# Supplementary material for: A Sister Lineage of Sampled Retroviruses Corroborates the Complex Evolution of Retroviruses
Source: PubMed Central journal article supplement — Mol Biol Evol. 2020 Nov 6;38(3):1031–9. doi: 10.1093/molbev/msaa272 (PMC7947760; doi:10.1093/molbev/msaa272), 2020-11-06
Supplement: msaa272_supplementary_data.pdf [file msaa272_supplementary_data.pdf]

## Supplemental Information

**Table S1. Estimated insertion time of endogenous lokiretroviruses**

| <b>Species</b>               | <b>Order</b>       | <b>Genome</b>   | <b>5'LTR-3'LTR Distance</b> | <b>Insertion Time/Mya</b> |
|------------------------------|--------------------|-----------------|-----------------------------|---------------------------|
| <i>Betta splendens</i>       | Anabantiformes     | GCF_900634795.2 | 0.001                       | 0.23                      |
| <i>Seriola rivoliana</i>     | Carangiformes      | GCA_002994505.1 | 0.006                       | 1.37                      |
| <i>Astyanax mexicanus</i>    | Characiformes      | GCF_000372685.2 | 0.011                       | 2.75                      |
| <i>Denticeps clupeioides</i> | Clupeiformes       | GCF_900700375.1 | 0                           | 0                         |
| <i>Labeo rohita</i>          | Cyprinodontiformes | GCA_000776015.1 | 0.013                       | 2.95                      |
| <i>Symphodus melops</i>      | Labriformes        | GCA_002819105.1 | 0                           | 0                         |
| <i>Perca flavescens</i>      | Perciformes        | GCF_004354835.1 | 0.009                       | 2.05                      |
| <i>Salmo trutta</i>          | Salmoniformes      | GCF_901001165.1 | 0.003                       | 0.68                      |
| <i>Nanorana parkeri</i>      | Anura              | GCF_000935625.1 | 0.162                       | 36.82                     |
| <i>Rana catesbeiana</i>      | Anura              | GCA_002284835.2 | 0.018                       | 4.09                      |
| <i>Xenopus tropicalis</i>    | Anura              | GCF_000004195.3 | 0.003                       | 0.68                      |

**Table S2. Information of genomes used in this study**

| <b>Organism Groups</b> | <b>Organism Name</b>                 | <b>Order</b>   | <b>Assembly</b> | <b>Level</b> | <b>Size(Mb)</b> | <b>GC%</b> | <b>Scaffolds</b> |
|------------------------|--------------------------------------|----------------|-----------------|--------------|-----------------|------------|------------------|
| Other animals (36)     | <i>Asymmetron lucayanum</i>          | Amphioxiformes | GCA_001663935.1 | Scaffold     | 460.59          | 40.4       | 212366           |
|                        | <i>Branchiostoma belcheri</i>        | Amphioxiformes | GCF_001625305.1 | Scaffold     | 426.12          | 41.4       | 2308             |
|                        | <i>Branchiostoma belcheri</i>        | Amphioxiformes | GCA_001625405.1 | Scaffold     | 707.9           | 41.3       | 10354            |
|                        | <i>Branchiostoma belcheri</i>        | Amphioxiformes | GCA_900128855.1 | Scaffold     | 417.04          | 39         | 2307             |
|                        | <i>Branchiostoma floridae</i>        | Amphioxiformes | GCF_000003815.1 | Scaffold     | 521.89          | 41.8       | 398              |
|                        | <i>Branchiostoma lanceolatum</i>     | Amphioxiformes | GCA_900088365.1 | Scaffold     | 495.29          | 39.8       | 10247            |
|                        | <i>Eucidaris tribuloides</i>         | Cidaroida      | GCA_001188425.1 | Scaffold     | 2187.26         | 37.2       | 637071           |
|                        | <i>Bathochordaeus stygius</i>        | Copelata       | GCA_004367955.1 | Scaffold     | 396.47          | 36.6       | 467514           |
|                        | <i>Fritillaria borealis</i>          | Copelata       | GCA_004368075.1 | Scaffold     | 143.09          | 40.5       | 142328           |
|                        | <i>Mesochordaeus erythrocephalus</i> | Copelata       | GCA_004367975.1 | Scaffold     | 874.02          | 36.4       | 745784           |
|                        | <i>Oikopleura albicans</i>           | Copelata       | GCA_004367875.1 | Scaffold     | 365.96          | 33.9       | 92906            |
|                        | <i>Oikopleura dioica</i>             | Copelata       | GCA_000209535.1 | Scaffold     | 70.47           | 40.2       | 1260             |
|                        | <i>Oikopleura dioica</i>             | Copelata       | GCA_000209555.1 | Scaffold     | 45.14           | 40.3       | 4196             |
|                        | <i>Oikopleura longicauda</i>         | Copelata       | GCA_004367895.1 | Contig       | 308.74          | 37.3       | 178440           |
|                        | <i>Oikopleura vanhoeffeni</i>        | Copelata       | GCA_004367855.1 | Scaffold     | 643.66          | 30.2       | 79827            |
|                        | <i>Hemicentrotus pulcherrimus</i>    | Echinoida      | GCA_003118195.1 | Scaffold     | 568.91          | 30.7       | 16251            |
|                        | <i>Strongylocentrotus purpuratus</i> | Echinoida      | GCF_000002235.4 | Scaffold     | 921.86          | 37.4       | 871              |
|                        | <i>Phallusia mammillata</i>          | Enterogona     | GCA_003260075.1 | Scaffold     | 233.92          | 36.1       | 11003            |
|                        | <i>Ciona intestinalis</i>            | Enterogona     | GCF_000224145.3 | Scaffold     | 115.23          | 36.02      | 1280             |
|                        | <i>Ciona intestinalis</i>            | Enterogona     | GCA_000183065.1 | Scaffold     | 116.73          | 36.1       | 2501             |
|                        | <i>Ciona savignyi</i>                | Enterogona     | GCA_000149265.1 | Scaffold     | 587.35          | 37.5       | 34009            |
|                        | <i>Ptychodera flava</i>              | Enteropneusta  | GCA_001465055.1 | Scaffold     | 1228.69         | 38.4       | 218255           |
|                        | <i>Saccoglossus kowalevskii</i>      | Enteropneusta  | GCF_000003605.2 | Scaffold     | 775.84          | 38.1       | 54120            |
|                        | <i>Ophionereis fasciata</i>          | Ophiurida      | GCA_900067615.1 | Scaffold     | 1184.53         | 32.6       | 3968282          |
|                        | <i>Ophiothrix spiculata</i>          | Ophiurida      | GCA_000969725.1 | Scaffold     | 2764.32         | 35.1       | 75696            |
|                        | <i>Botryllus schlosseri</i>          | Pleurogona     | GCA_000444245.1 | Scaffold     | 579.63          | 40.6       | 120139           |
|                        | <i>Salpa thompsoni</i>               | Salpida        | GCA_001749815.1 | Scaffold     | 318.75          | 34.2       | 478281           |
|                        | <i>Apostichopus japonicus</i>        | Synallactida   | GCA_002754855.1 | Scaffold     | 804.62          | 36.8       | 3278             |

|                |                                   |                    |                 |            |         |         |         |
|----------------|-----------------------------------|--------------------|-----------------|------------|---------|---------|---------|
|                | <i>Apostichopus japonicus</i>     | Synallactida       | GCA_001866495.1 | Scaffold   | 664.37  | 35.9    | 132607  |
|                | <i>Apostichopus parvimensis</i>   | Synallactida       | GCA_000934455.1 | Scaffold   | 873.09  | 38.7    | 21559   |
|                | <i>Lytechinus variegatus</i>      | Temnopleuridea     | GCA_000239495.2 | Scaffold   | 1061.2  | 36.9    | 322794  |
|                | <i>Acanthaster planci</i>         | Valvatida          | GCF_001949145.1 | Scaffold   | 383.86  | 41.5    | 1766    |
|                | <i>Acanthaster planci</i>         | Valvatida          | GCA_000950615.1 | Scaffold   | 2.58    | 41.5    | 2       |
|                | <i>Acanthaster planci</i>         | Valvatida          | GCA_001949165.1 | Scaffold   | 383.52  | 41.5    | 3274    |
|                | <i>Patiria miniata</i>            | Valvatida          | GCA_000285935.1 | Scaffold   | 811.03  | 40.5    | 60183   |
|                | <i>Patiriella regularis</i>       | Valvatida          | GCA_900067625.1 | Scaffold   | 949.33  | 37      | 3006458 |
| Fishes (4)     | <i>Eptatretus burgeri</i>         | Myxiniiformes      | GCA_900186335.2 | Scaffold   | 2608.38 | -       | 10846   |
|                | <i>Lethenteron camtschaticum*</i> | Petromyzontiformes | GCA_000466285.1 | Scaffold   | 1030.66 | 48.1    | 86125   |
|                | <i>Petromyzon marinus*</i>        | Petromyzontiformes | GCA_002833325.1 | Scaffold   | 1130.42 | 44.4    | 12061   |
|                | <i>Petromyzon marinus*</i>        | Petromyzontiformes | GCA_000148955.1 | Scaffold   | 885.53  | 46.8    | 25005   |
| Amphibians (7) | <i>Xenopus tropicalis*</i>        | Anura              | GCF_000004195.3 | Chromosome | 1440.4  | 40.5404 | 6822    |
|                | <i>Nanorana parkeri*</i>          | Anura              | GCF_000935625.1 | Scaffold   | 2053.87 | 42.7    | 25188   |
|                | <i>Xenopus laevis*</i>            | Anura              | GCF_001663975.1 | Chromosome | 2718.43 | 40.2325 | 108033  |
|                | <i>Rhinella marina</i>            | Anura              | GCA_900303285.1 | Contig     | 2551.76 | -       | 31391   |
|                | <i>Rana catesbeiana *</i>         | Anura              | GCA_002284835.2 | Scaffold   | 6250.35 | 43.6998 | 1544635 |
|                | <i>Pyxicephalus adspersus</i>     | Anura              | GCA_004786255.1 | Chromosome | 1563.37 | 39.2274 | 5411    |
|                | <i>Rhinatrema bivittatum*</i>     | Gymnophiona        | GCF_901001135.1 | Chromosome | 5319.24 | 44.44   | 1330    |
| reptiles (43)  | <i>Alligator mississippiensis</i> | Crocodylia         | GCF_000281125.3 | Scaffold   | 2161.73 | 44.4    | 7094    |
|                | <i>Alligator sinensis</i>         | Crocodylia         | GCF_000455745.1 | Scaffold   | 2270.57 | 44.6    | 9317    |
|                | <i>Crocodylus porosus</i>         | Crocodylia         | GCF_001723895.1 | Scaffold   | 2049.54 | 44.2    | 70      |
|                | <i>Sphenodon punctatus</i>        | Sphenodontia       | GCA_003113815.1 | Scaffold   | 4272.21 | -       | 16536   |
|                | <i>Anolis carolinensis</i>        | Squamata           | GCF_000090745.1 | Chromosome | 1799.14 | 40.8238 | 6646    |
|                | <i>Crotalus horridus</i>          | Squamata           | GCA_001625485.1 | Scaffold   | 1520.33 | 34.3    | 186068  |
|                | <i>Crotalus pyrrhus</i>           | Squamata           | GCA_000737285.1 | Scaffold   | 1126.79 | 38.5    | 473380  |
|                | <i>Crotalus viridis viridis</i>   | Squamata           | GCA_003400415.2 | Chromosome | 1340.2  | 39.3623 | 7043    |
|                | <i>Emydocephalus ijimae</i>       | Squamata           | GCA_004319985.1 | Scaffold   | 1625.2  | 40.3    | 157858  |
|                | <i>Gekko japonicus</i>            | Squamata           | GCF_001447785.1 | Scaffold   | 2490.27 | 45.5    | 191500  |
|                | <i>Hydrophis cyanocinctus</i>     | Squamata           | GCA_004023725.1 | Scaffold   | 1389.86 | 37.6    | 546690  |
|                | <i>Hydrophis hardwickii</i>       | Squamata           | GCA_004023765.1 | Scaffold   | 1296.39 | 37.2    | 616046  |
|                | <i>Hydrophis melanocephalus</i>   | Squamata           | GCA_004320005.1 | Scaffold   | 1402.64 | 34.8    | 122022  |
|                | <i>Lacerta bilineata</i>          | Squamata           | GCA_900245895.1 | Contig     | 1418.15 | -       | 7510    |

|             |                                      |                 |                 |            |         |         |        |
|-------------|--------------------------------------|-----------------|-----------------|------------|---------|---------|--------|
|             | <i>Lacerta viridis</i>               | Squamata        | GCA_900245905.1 | Contig     | 1439.84 | 43.7    | 4737   |
|             | <i>Laticauda colubrina</i>           | Squamata        | GCA_004320045.1 | Scaffold   | 2024.69 | 35.6    | 62906  |
|             | <i>Laticauda laticaudata</i>         | Squamata        | GCA_004320025.1 | Scaffold   | 1558.71 | 40.1    | 83587  |
|             | <i>Notechis scutatus</i>             | Squamata        | GCF_900518725.1 | Scaffold   | 1665.53 | 40.2    | 52414  |
|             | <i>Ophiophagus hannah</i>            | Squamata        | GCA_000516915.1 | Scaffold   | 1594.07 | 40.6    | 296399 |
|             | <i>Pantherophis guttatus</i>         | Squamata        | GCA_001185365.1 | Scaffold   | 1404.22 | 38.3    | 883920 |
|             | <i>Paroedura picta</i>               | Squamata        | GCA_003118565.1 | Scaffold   | 1694.16 | 40.7    | 110906 |
|             | <i>Podarcis muralis</i>              | Squamata        | GCF_004329235.1 | Chromosome | 1511.02 | 44.2081 | 2161   |
|             | <i>Pogona vitticeps</i>              | Squamata        | GCF_900067755.1 | Scaffold   | 1716.68 | 42.1    | 13749  |
|             | <i>Protobothrops flavoviridis</i>    | Squamata        | GCA_003402635.1 | Scaffold   | 1413.2  | 38.2    | 84502  |
|             | <i>Protobothrops mucrosquamatus</i>  | Squamata        | GCF_001527695.2 | Scaffold   | 1673.88 | 40.6    | 52280  |
|             | <i>Pseudonaja textilis</i>           | Squamata        | GCF_900518735.1 | Scaffold   | 1590.04 | 40.1    | 28550  |
|             | <i>Python bivittatus</i>             | Squamata        | GCF_000186305.1 | Scaffold   | 1435.05 | 39.7    | 39113  |
|             | <i>Salvator merianae</i>             | Squamata        | GCA_003586115.2 | Scaffold   | 2068.17 | 41.5    | 4512   |
|             | <i>Thamnophis sirtalis</i>           | Squamata        | GCF_001077635.1 | Scaffold   | 1424.9  | 41.8    | 7930   |
|             | <i>Thermophis baileyi</i>            | Squamata        | GCA_003457575.1 | Scaffold   | 1747.68 | -       | 20729  |
|             | <i>Varanus komodoensis</i>           | Squamata        | GCA_004798865.1 | Scaffold   | 1507.95 | 43.6    | 1411   |
|             | <i>Vipera berus berus</i>            | Squamata        | GCA_000800605.1 | Scaffold   | 1532.39 | 41.3    | 28883  |
|             | <i>Apalone spinifera</i>             | Testudines      | GCA_000385615.1 | Scaffold   | 1931.08 | 42.8    | 286620 |
|             | <i>Chelonia mydas*</i>               | Testudines      | GCF_000344595.1 | Scaffold   | 2208.41 | 43.7    | 140023 |
|             | <i>Chelonoidis abingdonii*</i>       | Testudines      | GCA_003597395.1 | Scaffold   | 2300.75 | 45.4    | 10623  |
|             | <i>Chrysemys picta bellii*</i>       | Testudines      | GCF_000241765.3 | Chromosome | 2365.77 | 44.564  | 78631  |
|             | <i>Cuora amboinensis*</i>            | Testudines      | GCA_004028625.2 | Scaffold   | 2214.83 | 43.9    | 89628  |
|             | <i>Cuora mccordi*</i>                | Testudines      | GCA_003846335.1 | Scaffold   | 2390.37 | 44.6    | 100020 |
|             | <i>Gopherus agassizii*</i>           | Testudines      | GCA_002896415.1 | Scaffold   | 2184.97 | 43      | 172559 |
|             | <i>Malaclemys terrapin terrapin*</i> | Testudines      | GCA_001728815.2 | Contig     | 2439.75 | 44.5    | 21684  |
|             | <i>Pelodiscus sinensis</i>           | Testudines      | GCF_000230535.1 | Scaffold   | 2202.48 | 44.4999 | 19904  |
|             | <i>Platysternon megacephalum*</i>    | Testudines      | GCA_003942145.1 | Scaffold   | 2319.09 | 43.7    | 359693 |
|             | <i>Terrapene carolina triunguis*</i> | Testudines      | GCF_002925995.2 | Scaffold   | 2571.27 | 44.6    | 52260  |
| Birds (146) | <i>Accipiter nisus</i>               | Accipitriformes | GCA_004320145.1 | Scaffold   | 1190.65 | 41.8    | 44975  |
|             | <i>Anser brachyrhynchus</i>          | Anseriforme     | GCA_002592135.1 | Scaffold   | 1116.99 | 41.1    | 2723   |
|             | <i>Anser cygnoides domesticus</i>    | Anseriforme     | GCF_000971095.1 | Scaffold   | 1119.15 | 41.5001 | 7593   |
|             | <i>Anser indicus</i>                 | Anseriforme     | GCA_006229135.1 | Scaffold   | 1143.09 | 40.8    | 10527  |
|             | <i>Anas platyrhynchos</i>            | Anseriformes    | GCF_003850225.1 | Chromosome | 1126.18 | 41.6676 | 2150   |
|             | <i>Anas zonorhyncha</i>              | Anseriformes    | GCA_002224875.1 | Scaffold   | 1310.8  | 37.7    | 20089  |

|                                            |                  |                 |            |         |         |        |
|--------------------------------------------|------------------|-----------------|------------|---------|---------|--------|
| <i>Calypte anna</i>                        | Apodiformes      | GCF_000699085.1 | Scaffold   | 1105.68 | 41.3    | 54736  |
| <i>Chaetura pelagica</i>                   | Apodiformes      | GCF_000747805.1 | Scaffold   | 1119.19 | 41.6    | 19072  |
| <i>Apteryx australis mantelli</i>          | Apterygiformes   | GCF_001039765.1 | Scaffold   | 1523.97 | 42.5    | 24720  |
| <i>Apteryx haastii</i>                     | Apterygiformes   | GCA_003342985.1 | Scaffold   | 1221.44 | 40.8    | 4183   |
| <i>Apteryx owenii</i>                      | Apterygiformes   | GCA_003342965.1 | Scaffold   | 1231.28 | 40.9    | 5096   |
| <i>Apteryx rowi</i>                        | Apterygiformes   | GCF_003343035.1 | Scaffold   | 1228.9  | 41.6    | 4120   |
| <i>Buceros rhinoceros silvestris</i>       | Bucerotiformes   | GCF_000710305.1 | Scaffold   | 1065.78 | 42.6    | 62257  |
| <i>Antrostomus carolinensis</i>            | Caprimulgiformes | GCF_000700745.1 | Scaffold   | 1119.68 | 40.8    | 70122  |
| <i>Cariama cristata</i>                    | Cariamiformes    | GCF_000690535.1 | Scaffold   | 1132.25 | 41.2    | 53474  |
| <i>Casuarius casuarius</i>                 | Casuariiformes   | GCA_003342895.1 | Scaffold   | 1209    | 41.4    | 3184   |
| <i>Dromaius novaehollandiae</i>            | Casuariiformes   | GCF_003342905.1 | Scaffold   | 1192.25 | 41.7    | 2778   |
| <i>Calidris pugnax</i>                     | Charadriiformes  | GCF_001431845.1 | Scaffold   | 1229.09 | 42.7    | 3753   |
| <i>Calidris pygmaea</i>                    | Charadriiformes  | GCA_003697955.1 | Scaffold   | 1178.37 | 44.2    | 29819  |
| <i>Charadrius vociferus</i>                | Charadriiformes  | GCF_000708025.1 | Scaffold   | 1219.86 | 42      | 15167  |
| <i>Himantopus himantopus leucocephalus</i> | Charadriiformes  | GCA_003993805.1 | Scaffold   | 1116.81 | 41.6    | 1442   |
| <i>Limosa lapponica baueri</i>             | Charadriiformes  | GCA_002844005.1 | Scaffold   | 1034.77 | 42.3    | 32319  |
| <i>Recurvirostra avosetta</i>              | Charadriiformes  | GCA_004023745.1 | Scaffold   | 1193.28 | 41.9    | 35873  |
| <i>Scolopax mira</i>                       | Charadriiformes  | GCA_004320125.1 | Scaffold   | 1091.29 | 41.6    | 40750  |
| <i>Uria lomvia</i>                         | Charadriiformes  | GCA_002289315.1 | Scaffold   | 1179.36 | 41.5    | 9327   |
| <i>Cathartes aura</i>                      | Ciconiiformes    | GCA_000699945.1 | Scaffold   | 1152.57 | 41.1    | 104141 |
| <i>Ciconia boyciana</i>                    | Ciconiiformes    | GCA_002002965.1 | Scaffold   | 1364.95 | 42.1    | 505419 |
| <i>Pterocles gutturalis</i>                | Ciconiiformes    | GCF_000699245.1 | Scaffold   | 1069.32 | 41.4    | 58607  |
| <i>Colius striatus</i>                     | Coliiformes      | GCF_000690715.1 | Scaffold   | 1075.93 | 40.9    | 70188  |
| <i>Columba livia</i>                       | Columbiformes    | GCF_000337935.1 | Scaffold   | 1107.99 | 41.6001 | 14923  |
| <i>Patagioenas fasciata monilis</i>        | Columbiformes    | GCA_002029285.1 | Scaffold   | 1089.15 | 40.9    | 9784   |
| <i>Streptopelia turtur</i>                 | Columbiformes    | GCA_901699155.1 | Chromosome | 1178.93 | 41.84   | 357    |
| <i>Leptosomus discolor</i>                 | Coraciiformes    | GCF_000691785.1 | Scaffold   | 1136.24 | 41.8    | 57160  |
| <i>Merops nubicus</i>                      | Coraciiformes    | GCF_000691845.1 | Scaffold   | 1062.96 | 41.7    | 53499  |
| <i>Cuculus canorus</i>                     | Cuculiformes     | GCF_000709325.1 | Scaffold   | 1153.89 | 41.7    | 14930  |
| <i>Aquila chrysaetos canadensis</i>        | Falconiformes    | GCF_000766835.1 | Scaffold   | 1192.74 | 41.9001 | 1142   |
| <i>Falco cherrug</i>                       | Falconiformes    | GCF_000337975.1 | Scaffold   | 1174.81 | 41.8    | 5863   |
| <i>Falco peregrinus</i>                    | Falconiformes    | GCF_000337955.1 | Scaffold   | 1171.97 | 41.8    | 7021   |
| <i>Haliaeetus albicilla</i>                | Falconiformes    | GCF_000691405.1 | Scaffold   | 1133.55 | 40.9    | 50905  |
| <i>Haliaeetus leucocephalus</i>            | Falconiformes    | GCF_000737465.1 | Scaffold   | 1178.41 | 41.8    | 1023   |
| <i>Bambusicola thoracicus</i>              | Galliformes      | GCA_002909625.1 | Scaffold   | 1032.3  | 0       | 163748 |

|                                        |                   |                 |            |         |         |        |
|----------------------------------------|-------------------|-----------------|------------|---------|---------|--------|
| <i>Callipepla squamata</i>             | Galliformes       | GCA_002218305.1 | Scaffold   | 1045.28 | 40.6    | 34302  |
| <i>Chrysolophus pictus</i>             | Galliformes       | GCA_003413605.1 | Scaffold   | 1023.99 | 41      | 14294  |
| <i>Colinus virginianus</i>             | Galliformes       | GCA_000599465.2 | Scaffold   | 1254.15 | 38.6    | 42369  |
| <i>Coturnix japonica</i>               | Galliformes       | GCF_001577835.1 | Chromosome | 927.657 | 41.3684 | 2531   |
| <i>Gallus gallus</i>                   | Galliformes       | GCF_000002315.6 | Chromosome | 1065.37 | 42.3032 | 525    |
| <i>Lagopus muta japonica</i>           | Galliformes       | GCA_004320205.1 | Scaffold   | 1002.56 | 41.4    | 62806  |
| <i>Lyrurus tetrix tetrix</i>           | Galliformes       | GCA_000586395.1 | Contig     | 657.025 | 40.9    | 971998 |
| <i>Meleagris gallopavo</i>             | Galliformes       | GCF_000146605.2 | Chromosome | 1128.34 | 41.7219 | 233806 |
| <i>Numida meleagris</i>                | Galliformes       | GCF_002078875.1 | Chromosome | 1043.26 | 41.8975 | 2739   |
| <i>Pavo cristatus</i>                  | Galliformes       | GCA_005519975.1 | Scaffold   | 1027.51 | -       | 179332 |
| <i>Phasianus colchicus</i>             | Galliformes       | GCA_004143745.1 | Scaffold   | 1017.51 | 40.9    | 39677  |
| <i>Syrnaticus mikado</i>               | Galliformes       | GCA_003435085.1 | Scaffold   | 1066.43 | 40.5    | 71281  |
| <i>Tympanuchus cupido pinnatus</i>     | Galliformes       | GCA_001870855.1 | Scaffold   | 983.777 | -       | 12186  |
| <i>Gavia stellata</i>                  | Gaviiformes       | GCF_000690875.1 | Scaffold   | 1129.69 | 41.1001 | 61831  |
| <i>Balearica regulorum gibbericeps</i> | Gruiformes        | GCF_000709895.1 | Scaffold   | 1127.62 | 41.2001 | 53491  |
| <i>Chlamydotis macqueenii</i>          | Gruiformes        | GCF_000695195.1 | Scaffold   | 1086.57 | 41.1    | 59693  |
| <i>Chlamydotis undulata undulata</i>   | Gruiformes        | GCA_003400225.1 | Scaffold   | 1307.64 | 39      | 80662  |
| <i>Eurypyga helias</i>                 | Gruiformes        | GCF_000690775.1 | Scaffold   | 1088.02 | 42.3    | 62699  |
| <i>Gallirallus okinawae</i>            | Gruiformes        | GCA_002003005.1 | Contig     | 1114.53 | 42.7    | 768680 |
| <i>Grus japonensis</i>                 | Gruiformes        | GCA_002002985.1 | Scaffold   | 1265.63 | 41.6    | 357545 |
| <i>Grus nigricollis</i>                | Gruiformes        | GCA_004360235.1 | Scaffold   | 1230.91 | 42.7    | 1812   |
| <i>Mesitornis unicolor</i>             | Gruiformes        | GCF_000695765.1 | Scaffold   | 1087.29 | 41.3    | 67520  |
| <i>Tauraco erythrolophus</i>           | Musophagiformes   | GCF_000709365.1 | Scaffold   | 1155.54 | 41.6    | 59587  |
| <i>Opisthocomus hoazin</i>             | Opisthocomiformes | GCF_000692075.1 | Scaffold   | 1203.71 | 42.7    | 10256  |
| <i>Acanthisitta chloris</i>            | Passeriformes     | GCF_000695815.1 | Scaffold   | 1035.88 | 41.6    | 53875  |
| <i>Acridotheres javanicus</i>          | Passeriformes     | GCA_002849675.1 | Scaffold   | 1051.58 | 39.9    | 4312   |
| <i>Ciccinnurus regius</i>              | Passeriformes     | GCA_003713305.1 | Scaffold   | 1059.54 | 41.8    | 4390   |
| <i>Corapipo altera</i>                 | Passeriformes     | GCF_003945725.1 | Scaffold   | 1095.75 | 41.9    | 9068   |
| <i>Corvus brachyrhynchos</i>           | Passeriformes     | GCF_000691975.1 | Scaffold   | 1091.31 | 42      | 10547  |
| <i>Corvus cornix cornix</i>            | Passeriformes     | GCF_000738735.2 | Scaffold   | 1042.28 | 41.7    | 113    |
| <i>Corvus hawaiiensis</i>              | Passeriformes     | GCA_003402825.1 | Contig     | 1497.61 | 42.9    | 2752   |
| <i>Cyanistes caeruleus</i>             | Passeriformes     | GCF_002901205.1 | Scaffold   | 1186.98 | 41.8    | 29297  |
| <i>Diphyllodes magnificus</i>          | Passeriformes     | GCA_003713285.1 | Scaffold   | 1065.98 | 41.5    | 3098   |
| <i>Empidonax traillii</i>              | Passeriformes     | GCF_003031625.1 | Scaffold   | 1123.49 | 42.4    | 7791   |
| <i>Eopsaltria australis</i>            | Passeriformes     | GCA_003426825.1 | Scaffold   | 1228.34 | 43      | 20702  |

|                                            |                |                 |            |         |         |        |
|--------------------------------------------|----------------|-----------------|------------|---------|---------|--------|
| <i>Erythrura gouldiae</i>                  | Passeriformes  | GCA_003676055.1 | Scaffold   | 1070.79 | 41      | 18372  |
| <i>Ficedula albicollis</i>                 | Passeriformes  | GCF_000247815.1 | Chromosome | 1118.34 | 44.2999 | 21836  |
| <i>Geospiza fortis</i>                     | Passeriformes  | GCF_000277835.1 | Scaffold   | 1065.29 | 41.7    | 27239  |
| <i>Hemignathus virens</i>                  | Passeriformes  | GCA_003286495.1 | Scaffold   | 1086.51 | 40.1    | 19546  |
| <i>Hirundo rustica rustica</i>             | Passeriformes  | GCA_003692655.1 | Scaffold   | 1213.74 | 41.6    | 364    |
| <i>Junco hyemalis</i>                      | Passeriformes  | GCA_003829775.1 | Scaffold   | 958.315 | 40.7    | 4457   |
| <i>Lepidothrix coronata</i>                | Passeriformes  | GCF_001604755.1 | Scaffold   | 1079.58 | 41.9    | 4612   |
| <i>Lonchura striata domestica</i>          | Passeriformes  | GCF_002197715.1 | Scaffold   | 1060.17 | 41.8001 | 3014   |
| <i>Manacus vitellinus</i>                  | Passeriformes  | GCF_001715985.2 | Scaffold   | 1213.15 | 42.3    | 15315  |
| <i>Mixornis gularis</i>                    | Passeriformes  | GCA_003546035.1 | Scaffold   | 1036.1  | -       | 9542   |
| <i>Neopelma chrysocephalum</i>             | Passeriformes  | GCF_003984885.1 | Scaffold   | 1142.8  | 42.4    | 42063  |
| <i>Paradisaea raggiana</i>                 | Passeriformes  | GCA_003713265.1 | Scaffold   | 1037.51 | 41.9    | 6544   |
| <i>Paradisaea rubra</i>                    | Passeriformes  | GCA_003713215.1 | Scaffold   | 1071.26 | 41.6    | 4376   |
| <i>Parotia lawesii</i>                     | Passeriformes  | GCA_003713295.1 | Scaffold   | 1056.92 | 42      | 3976   |
| <i>Parus major</i>                         | Passeriformes  | GCF_001522545.3 | Chromosome | 1020.31 | 41.5208 | 1675   |
| <i>Passer domesticus</i>                   | Passeriformes  | GCA_001700915.1 | Chromosome | 1042.72 | 41.1833 | 2571   |
| <i>Phylloscopus plumbeitarsus</i>          | Passeriformes  | GCA_001655115.1 | Scaffold   | 997.399 | 41.5    | 308480 |
| <i>Phylloscopus trochiloides viridanus</i> | Passeriformes  | GCA_001655095.1 | Scaffold   | 1003.33 | 41.4    | 158605 |
| <i>Phylloscopus trochilus acredula</i>     | Passeriformes  | GCA_002305835.1 | Scaffold   | 1066.52 | 41.2    | 5995   |
| <i>Pipra filicauda</i>                     | Passeriformes  | GCF_003945595.1 | Scaffold   | 1110.96 | 42.3    | 3744   |
| <i>Pseudopodoces humilis</i>               | Passeriformes  | GCF_000331425.1 | Scaffold   | 1043    | 41.8001 | 5406   |
| <i>Saxicola maurus maurus</i>              | Passeriformes  | GCA_900205225.1 | Scaffold   | 1020.37 | 39.6    | 2819   |
| <i>Serinus canaria</i>                     | Passeriformes  | GCF_000534875.1 | Scaffold   | 1152.1  | 42.6    | 304400 |
| <i>Setophaga coronata coronata</i>         | Passeriformes  | GCA_001746935.1 | Scaffold   | 1171.93 | 37.3    | 154686 |
| <i>Sporophila hypoxantha</i>               | Passeriformes  | GCA_002167245.1 | Scaffold   | 1067.76 | 40.6    | 5095   |
| <i>Sturnus vulgaris</i>                    | Passeriformes  | GCF_001447265.1 | Scaffold   | 1036.76 | 41.7    | 2361   |
| <i>Taeniopygia guttata</i>                 | Passeriformes  | GCF_000151805.1 | Chromosome | 1232.14 | 41.4526 | 37422  |
| <i>Zosterops lateralis melanops</i>        | Passeriformes  | GCA_001281735.1 | Scaffold   | 1036    | 41.3    | 2933   |
| <i>Zonotrichia albicollis</i>              | Passeriformes  | GCF_000385455.1 | Scaffold   | 1052.6  | 41.8    | 6018   |
| <i>Egretta garzetta</i>                    | Pelecaniformes | GCF_000687185.1 | Scaffold   | 1206.5  | 42.5    | 11791  |
| <i>Nannopterum auritus</i>                 | Pelecaniformes | GCA_002173455.1 | Scaffold   | 1246.05 | 42.1    | 27523  |
| <i>Nannopterum brasilianus</i>             | Pelecaniformes | GCA_002174335.1 | Scaffold   | 1346.19 | 42.2    | 266364 |
| <i>Nannopterum harrisi</i>                 | Pelecaniformes | GCA_002173475.1 | Scaffold   | 1202.99 | 42.1    | 2651   |
| <i>Nipponia nippon</i>                     | Pelecaniformes | GCF_000708225.1 | Scaffold   | 1223.86 | 42.0001 | 59555  |
| <i>Pelecanus crispus</i>                   | Pelecaniformes | GCF_000687375.1 | Scaffold   | 1160.92 | 41.4    | 63982  |

|                                   |                     |                 |            |         |         |        |
|-----------------------------------|---------------------|-----------------|------------|---------|---------|--------|
| <i>Phaethon lepturus</i>          | Pelecaniformes      | GCF_000687285.1 | Scaffold   | 1152.96 | 41.5    | 66785  |
| <i>Phalacrocorax carbo</i>        | Pelecaniformes      | GCF_000708925.1 | Scaffold   | 1138.97 | 41.3    | 64312  |
| <i>Urile pelagicus</i>            | Pelecaniformes      | GCA_002173435.1 | Scaffold   | 1210.66 | -       | 20951  |
| <i>Phoenicopterus ruber ruber</i> | Phoenicopteriformes | GCA_000687265.1 | Scaffold   | 1132.18 | 41.9    | 76189  |
| <i>Dendrocopos noguchii</i>       | Piciformes          | GCA_004320165.1 | Scaffold   | 1134.56 | 44.8    | 154720 |
| <i>Picoides pubescens</i>         | Piciformes          | GCF_000699005.1 | Scaffold   | 1167.32 | 44.6    | 31254  |
| <i>Podiceps cristatus</i>         | Podicipediformes    | GCA_000699545.1 | Scaffold   | 1134.92 | 41.5    | 82923  |
| <i>Fulmarus glacialis</i>         | Procellariiformes   | GCF_000690835.1 | Scaffold   | 1141.4  | 41.2    | 57389  |
| <i>Agapornis roseicollis</i>      | Psittaciformes      | GCA_002631895.1 | Scaffold   | 1121.79 | 41      | 52900  |
| <i>Amazona aestiva</i>            | Psittaciformes      | GCA_001420675.1 | Scaffold   | 1129.54 | 42.2    | 3232   |
| <i>Amazona collaria</i>           | Psittaciformes      | GCA_003947215.1 | Scaffold   | 1258.72 | -       | 10638  |
| <i>Amazona vittata</i>            | Psittaciformes      | GCA_000332375.1 | Scaffold   | 1175.4  | 41.7    | 182974 |
| <i>Ara macao</i>                  | Psittaciformes      | GCA_000400695.1 | Scaffold   | 1204.7  | 42.5001 | 192790 |
| <i>Melopsittacus undulatus</i>    | Psittaciformes      | GCF_000238935.1 | Scaffold   | 1117.37 | 41.4001 | 25212  |
| <i>Nestor notabilis</i>           | Psittaciformes      | GCF_000696875.1 | Scaffold   | 1053.56 | 41.1    | 42180  |
| <i>Psittacula krameri</i>         | Psittaciformes      | GCA_002870145.1 | Scaffold   | 1417.81 | 38.1    | 167560 |
| <i>Strigops habroptila</i>        | Psittaciformes      | GCA_004027225.1 | Chromosome | 1165.64 | 42.1216 | 100    |
| <i>Pterocnemia pennata</i>        | Rheiformes          | GCA_003342835.1 | Scaffold   | 1168.29 | 40.3    | 3019   |
| <i>Rhea americana</i>             | Rheiformes          | GCA_003343005.1 | Scaffold   | 1160.84 | 40.2    | 2162   |
| <i>Aptenodytes forsteri</i>       | Sphenisciformes     | GCF_000699145.1 | Scaffold   | 1254.35 | 42      | 10672  |
| <i>Pygoscelis adeliae</i>         | Sphenisciformes     | GCF_000699105.1 | Scaffold   | 1216.62 | 41.8001 | 19265  |
| <i>Pygoscelis antarcticus</i>     | Sphenisciformes     | GCA_003264595.1 | Scaffold   | 1209.83 | 39.6    | 1783   |
| <i>Pygoscelis papua</i>           | Sphenisciformes     | GCA_003264615.1 | Scaffold   | 1209.91 | 39.6    | 1783   |
| <i>Spheniscus humboldti</i>       | Sphenisciformes     | GCA_003264545.1 | Scaffold   | 1209.86 | 39.6    | 1783   |
| <i>Spheniscus magellanicus</i>    | Sphenisciformes     | GCA_003264715.1 | Scaffold   | 1209.86 | 39.6    | 1783   |
| <i>Spheniscus mendiculus</i>      | Sphenisciformes     | GCA_003264655.1 | Scaffold   | 1209.85 | 39.6    | 1783   |
| <i>Athene cunicularia</i>         | Strigiformes        | GCF_003259725.1 | Scaffold   | 1157.07 | 41      | 445    |
| <i>Bubo blakistoni</i>            | Strigiformes        | GCA_004320225.1 | Scaffold   | 1193.86 | 41.7    | 46772  |
| <i>Strix occidentalis caurina</i> | Strigiformes        | GCA_002372975.1 | Scaffold   | 1255.54 | 41.3    | 8108   |
| <i>Tyto alba</i>                  | Strigiformes        | GCF_000687205.1 | Scaffold   | 1120.14 | 40.2    | 62122  |
| <i>Struthio camelus australis</i> | Struthioniformes    | GCF_000698965.1 | Scaffold   | 1225.04 | 41.3    | 6915   |
| <i>Crypturellus cinnamomeus</i>   | Tinamiformes        | GCA_003342915.1 | Scaffold   | 1122.05 | 41.7    | 8086   |
| <i>Eudromia elegans</i>           | Tinamiformes        | GCA_003342815.1 | Scaffold   | 955.515 | 41.8    | 2364   |
| <i>Nothoprocta perdicaria</i>     | Tinamiformes        | GCF_003342845.1 | Scaffold   | 965.904 | 42.1    | 2217   |
| <i>Tinamus guttatus</i>           | Tinamiformes        | GCF_000705375.1 | Scaffold   | 1047.06 | 41.5    | 82514  |



## Fishes (226)

|                                   |                   |                 |            |         |         |        |
|-----------------------------------|-------------------|-----------------|------------|---------|---------|--------|
| <i>Apaloderma vittatum</i>        | Trogoniformes     | GCF_000703405.1 | Scaffold   | 1070.84 | 41.4    | 54728  |
| <i>Acipenser ruthenus</i> *       | Acipenseriformes  | GCA_004119895.1 | Scaffold   | 1732.55 | 34.4    | 215913 |
| <i>Anabas testudineus</i>         | Anabantiformes    | GCF_900324465.1 | Scaffold   | 569.722 | 40.5001 | 70     |
| <i>Betta splendens</i> *          | Anabantiformes    | GCF_900634795.2 | Chromosome | 441.389 | 45.2975 | 70     |
| <i>Channa argus var. Kimnra</i>   | Anabantiformes    | GCA_004786185.1 | Chromosome | 644.13  | 39.8556 | 562    |
| <i>Helostoma temminckii</i> *     | Anabantiformes    | GCA_900302695.1 | Scaffold   | 599.808 | -       | 21407  |
| <i>Anguilla anguilla</i> *        | Anguilliformes    | GCA_000695075.1 | Scaffold   | 1018.7  | 42.9    | 501148 |
| <i>Anguilla japonica</i> *        | Anguilliformes    | GCA_003597225.1 | Scaffold   | 966.917 | -       | 83292  |
| <i>Anguilla rostrata</i> *        | Anguilliformes    | GCA_001606085.1 | Scaffold   | 1413.03 | 41      | 79209  |
| <i>Guentherus altivela</i> *      | Ateleopodiformes  | GCA_900312595.1 | Scaffold   | 539.599 | 42.2    | 189411 |
| <i>Parasudis fraserbrunneri</i>   | Aulopiformes      | GCA_900302295.1 | Scaffold   | 707.987 | -       | 156389 |
| <i>Chatrabus melanurus</i> *      | Batrachoidiformes | GCA_900302635.1 | Scaffold   | 1128.44 | 41.4    | 238795 |
| <i>Oryzias javanicus</i> *        | Beloniformes      | GCA_003999625.1 | Chromosome | 809.68  | 38.9689 | 254    |
| <i>Oryzias latipes</i>            | Beloniformes      | GCF_002234675.1 | Chromosome | 734.057 | 40.8475 | 25     |
| <i>Oryzias melastigma</i> *       | Beloniformes      | GCF_002922805.1 | Scaffold   | 779.47  | 39.6    | 8603   |
| <i>Acanthochaenus luetkenii</i> * | Beryciformes      | GCA_900312575.1 | Scaffold   | 545.759 | 42.6    | 91087  |
| <i>Beryx splendens</i> *          | Beryciformes      | GCA_900312565.1 | Scaffold   | 533.268 | 43.3    | 117400 |
| <i>Monocentris japonicus</i>      | Beryciformes      | GCA_900323365.1 | Scaffold   | 556.024 | -       | 52108  |
| <i>Rondeletia loricata</i> *      | Beryciformes      | GCA_900302605.1 | Scaffold   | 568.598 | -       | 103827 |
| <i>Echeneis naucrates</i> *       | Carangiformes     | GCF_900963305.1 | Chromosome | 544.213 | 41.43   | 37     |
| <i>Selene dorsalis</i>            | Carangiformes     | GCA_900303245.1 | Scaffold   | 528.779 | 41.7    | 36113  |
| <i>Seriola dumerili</i> *         | Carangiformes     | GCF_002260705.1 | Scaffold   | 677.686 | 40.9002 | 34656  |
| <i>Seriola lalandi dorsalis</i> * | Carangiformes     | GCF_002814215.1 | Scaffold   | 732.51  | 40.9002 | 99598  |
| <i>Seriola quinqueradiata</i> *   | Carangiformes     | GCA_002217815.1 | Scaffold   | 639.27  | 40.9    | 384    |
| <i>Seriola rivoliana</i> *        | Carangiformes     | GCA_002994505.1 | Scaffold   | 666.142 | 40.5002 | 1343   |
| <i>Trachinotus ovatus</i> *       | Carangiformes     | GCA_900607315.1 | Scaffold   | 648.062 | 41.1    | 138    |
| <i>Scyliorhinus torazame</i>      | Carcharhiniformes | GCA_003427355.1 | Scaffold   | 4470.98 | 38.5    | 458049 |
| <i>Maccullochella peelii</i> *    | Centrarchiformes  | GCA_002120245.1 | Scaffold   | 633.241 | -       | 18198  |
| <i>Macquaria australasica</i> *   | Centrarchiformes  | GCA_005408345.1 | Scaffold   | 675.976 | 41      | 2962   |
| <i>Micropterus floridanus</i> *   | Centrarchiformes  | GCA_002592385.1 | Contig     | 1001.52 | 40.7    | 249768 |
| <i>Oplegnathus fasciatus</i> *    | Centrarchiformes  | GCA_003416845.1 | Scaffold   | 766.301 | 38.7    | 4149   |
| <i>Astyanax mexicanus</i> *       | Characiformes     | GCF_000372685.2 | Chromosome | 1335.24 | 38.409  | 2415   |
| <i>Pygocentrus nattereri</i> *    | Characiformes     | GCF_001682695.1 | Scaffold   | 1285.35 | 40.6001 | 283518 |
| <i>Callorhynchus milii</i>        | Chimaeriformes    | GCF_000165045.1 | Scaffold   | 974.499 | 42.5998 | 21204  |
| <i>Amphilophus citrinellus</i>    | Cichliformes      | GCA_000751415.1 | Scaffold   | 844.903 | 41.4    | 6637   |

|                                          |                    |                 |            |         |         |        |
|------------------------------------------|--------------------|-----------------|------------|---------|---------|--------|
| <i>Astatotilapia calliptera</i>          | Cichliformes       | GCF_900246225.1 | Chromosome | 880.446 | 41.0816 | 249    |
| <i>Haplochromis burtoni</i>              | Cichliformes       | GCF_000239415.1 | Scaffold   | 831.412 | 41.9    | 8001   |
| <i>Labeotropheus fuelleborni</i>         | Cichliformes       | GCA_000150875.1 | Scaffold   | 70.8584 | 42.1    | 58245  |
| <i>Maylandia zebra</i>                   | Cichliformes       | GCF_000238955.4 | Chromosome | 957.485 | 41.1537 | 1690   |
| <i>Mchenga conophoros</i>                | Cichliformes       | GCA_000150855.1 | Scaffold   | 73.4256 | 41.8    | 61923  |
| <i>Melanochromis auratus</i>             | Cichliformes       | GCA_000150895.1 | Scaffold   | 68.2386 | 41.5    | 63297  |
| <i>Neolamprologus brichardi</i>          | Cichliformes       | GCF_000239395.1 | Scaffold   | 847.91  | 42.0001 | 9099   |
| <i>Oreochromis aureus</i>                | Cichliformes       | GCA_005870065.1 | Scaffold   | 918.94  | 36.3    | 12951  |
| <i>Oreochromis niloticus</i>             | Cichliformes       | GCF_001858045.2 | Chromosome | 1005.68 | 40.7187 | 2460   |
| <i>Pundamilia nyererei</i>               | Cichliformes       | GCF_000239375.1 | Scaffold   | 830.133 | 41.9    | 7236   |
| <i>Rhamphochromis esox</i>               | Cichliformes       | GCA_000150935.1 | Scaffold   | 71.2951 | 42.3    | 55751  |
| <i>Simochromis diagramma</i>             | Cichliformes       | GCA_900408965.1 | Scaffold   | 848.827 | 40.9    | 823    |
| <i>Clupea harengus*</i>                  | Clupeiformes       | GCF_000966335.1 | Scaffold   | 807.712 | 44.5001 | 6915   |
| <i>Denticeps clupeoides*</i>             | Clupeiformes       | GCF_900700375.1 | Chromosome | 567.401 | 43.744  | 460    |
| <i>Sardina pilchardus</i>                | Clupeiformes       | GCA_900499035.1 | Scaffold   | 949.617 | -       | 117259 |
| <i>Tenualosa ilisha</i>                  | Clupeiformes       | GCA_003651195.1 | Scaffold   | 815.648 | 43.3    | 124209 |
| <i>Latimeria chalumnae*</i>              | Coelacanthiformes  | GCF_000225785.1 | Scaffold   | 2860.59 | 43      | 22819  |
| <i>Carassius auratus*</i>                | Cypriniformes      | GCF_003368295.1 | Chromosome | 1820.64 | 37.4838 | 6216   |
| <i>Cirrhinus molitorella*</i>            | Cypriniformes      | GCA_004028445.1 | Scaffold   | 920.273 | 34.3    | 478313 |
| <i>Cyprinus carpio*</i>                  | Cypriniformes      | GCF_000951615.1 | Chromosome | 1713.66 | 37.3325 | 9378   |
| <i>Danionella dracula*</i>               | Cypriniformes      | GCA_900490495.1 | Scaffold   | 665.208 | 37.5    | 996    |
| <i>Hypophthalmichthys molitrix*</i>      | Cypriniformes      | GCA_004764525.1 | Scaffold   | 1104.68 | 31.4    | 107095 |
| <i>Hypophthalmichthys nobilis*</i>       | Cypriniformes      | GCA_004193235.1 | Scaffold   | 1012.06 | 34.7    | 121326 |
| <i>Labeo rohita*</i>                     | Cypriniformes      | GCA_004120215.1 | Scaffold   | 1484.73 | 35.0001 | 13623  |
| <i>Leuciscus waleckii*</i>               | Cypriniformes      | GCA_900092035.1 | Scaffold   | 752.539 | 37.4    | 4888   |
| <i>Oxygymnocypris stewartii*</i>         | Cypriniformes      | GCA_003573665.1 | Scaffold   | 1849.22 | -       | 26281  |
| <i>Pimephales promelas*</i>              | Cypriniformes      | GCA_000700825.1 | Scaffold   | 1219.33 | 41.7    | 73057  |
| <i>Poropuntius huangchuchieni*</i>       | Cypriniformes      | GCA_004124795.1 | Scaffold   | 760.177 | 35.4    | 625277 |
| <i>Sinocyclocheilus anshuiensis*</i>     | Cypriniformes      | GCF_001515605.1 | Scaffold   | 1632.72 | 38.0001 | 85682  |
| <i>Sinocyclocheilus grahami*</i>         | Cypriniformes      | GCF_001515645.1 | Scaffold   | 1750.29 | 38.7    | 31277  |
| <i>Sinocyclocheilus rhinoceros*</i>      | Cypriniformes      | GCF_001515625.1 | Scaffold   | 1655.79 | 38.1    | 164173 |
| <i>Triplophysa siluroides*</i>           | Cypriniformes      | GCA_006030095.1 | Scaffold   | 583.43  | 39.5    | 1002   |
| <i>Anabarilius grahami*</i>              | Cypriniformes      | GCA_003731715.1 | Scaffold   | 991.887 | 36.7    | 80398  |
| <i>Austrofundulus limnaeus*</i>          | Cyprinodontiformes | GCF_001266775.1 | Scaffold   | 866.963 | 41.1    | 29785  |
| <i>Cyprinodon nevadensis pectoralis*</i> | Cyprinodontiformes | GCA_000776015.1 | Scaffold   | 1011.85 | 39      | 96516  |

|                                    |                    |                 |            |         |         |        |
|------------------------------------|--------------------|-----------------|------------|---------|---------|--------|
| <i>Cyprinodon variegatus*</i>      | Cyprinodontiformes | GCF_000732505.1 | Scaffold   | 1035.18 | 39.5001 | 9259   |
| <i>Fundulus heteroclitus*</i>      | Cyprinodontiformes | GCF_000826765.1 | Scaffold   | 1021.9  | 41.2    | 10180  |
| <i>Gambusia affinis</i>            | Cyprinodontiformes | GCA_003097735.1 | Scaffold   | 598.663 | 38.2    | 2943   |
| <i>Kryptolebias marmoratus*</i>    | Cyprinodontiformes | GCF_001649575.1 | Scaffold   | 680.367 | 40.6001 | 3073   |
| <i>Nothobranchius furzeri*</i>     | Cyprinodontiformes | GCF_001465895.1 | Chromosome | 1242.52 | 44.8104 | 6013   |
| <i>Poecilia latipinna</i>          | Cyprinodontiformes | GCF_001443285.1 | Scaffold   | 815.145 | 40.8    | 17988  |
| <i>Poecilia mexicana</i>           | Cyprinodontiformes | GCF_001443325.1 | Scaffold   | 801.711 | 40.7    | 18105  |
| <i>Poecilia reticulata</i>         | Cyprinodontiformes | GCF_000633615.1 | Chromosome | 731.622 | 40.2816 | 3029   |
| <i>Xiphophorus couchianus</i>      | Cyprinodontiformes | GCF_001444195.1 | Chromosome | 688.542 | 39.0399 | 68     |
| <i>Xiphophorus hellerii</i>        | Cyprinodontiformes | GCA_003331165.1 | Chromosome | 733.127 | 39.1072 | 85     |
| <i>Xiphophorus maculatus</i>       | Cyprinodontiformes | GCF_002775205.1 | Chromosome | 704.321 | 39.0265 | 102    |
| <i>Poecilia formosa</i>            | Cyprinodontiformes | GCF_000485575.1 | Scaffold   | 748.923 | 39.6    | 3985   |
| <i>Esox lucius</i>                 | Esociformes        | GCF_004634155.1 | Chromosome | 940.907 | 42.2905 | 811    |
| <i>Arctogadus glacialis</i>        | Gadiformes         | GCA_900303235.1 | Scaffold   | 428.792 | 44.5    | 139389 |
| <i>Bagarius yarrelli</i>           | Gadiformes         | GCA_005784505.1 | Scaffold   | 570.81  | 38      | 541    |
| <i>Bathygadus melanobranchus</i>   | Gadiformes         | GCA_900302375.1 | Scaffold   | 431.203 | -       | 92290  |
| <i>Boreogadus saida</i>            | Gadiformes         | GCA_900302515.1 | Scaffold   | 412.07  | -       | 137701 |
| <i>Bregmaceros cantori</i>         | Gadiformes         | GCA_900302395.1 | Scaffold   | 1144.1  | 42.9    | 258566 |
| <i>Brosme brosme</i>               | Gadiformes         | GCA_900302425.1 | Scaffold   | 412.731 | -       | 114910 |
| <i>Coryphaenoides rupestris</i>    | Gadiformes         | GCA_002895965.1 | Scaffold   | 829.209 | -       | 47680  |
| <i>Gadiculus argenteus</i>         | Gadiformes         | GCA_900302595.1 | Scaffold   | 396.767 | -       | 123363 |
| <i>Gadus chalcogrammus</i>         | Gadiformes         | GCA_900302575.1 | Scaffold   | 448.868 | 44.6    | 130159 |
| <i>Gadus morhua</i>                | Gadiformes         | GCA_000231765.1 | Scaffold   | 824.311 | 46.3    | 427427 |
| <i>Laemonema laureysi</i>          | Gadiformes         | GCA_900303225.1 | Scaffold   | 306.495 | -       | 86525  |
| <i>Lota lota</i>                   | Gadiformes         | GCA_900302385.1 | Scaffold   | 397.499 | -       | 106616 |
| <i>Macrourus berglax</i>           | Gadiformes         | GCA_900302365.1 | Scaffold   | 399.876 | -       | 118318 |
| <i>Malacocephalus occidentalis</i> | Gadiformes         | GCA_900312585.1 | Scaffold   | 350.34  | -       | 95829  |
| <i>Melanogrammus aeglefinus</i>    | Gadiformes         | GCA_900291075.1 | Scaffold   | 652.791 | 44.9    | 8420   |
| <i>Melanonus zugmayeri</i>         | Gadiformes         | GCA_900302345.1 | Scaffold   | 432.903 | -       | 82409  |
| <i>Merlangius merlangus</i>        | Gadiformes         | GCA_900323355.1 | Scaffold   | 423.942 | 44.4    | 122642 |
| <i>Merluccius capensis</i>         | Gadiformes         | GCA_900312945.1 | Scaffold   | 414.317 | -       | 110925 |
| <i>Merluccius merluccius</i>       | Gadiformes         | GCA_900312545.1 | Scaffold   | 401.035 | -       | 102914 |
| <i>Merluccius polli</i>            | Gadiformes         | GCA_900312625.1 | Scaffold   | 401.149 | -       | 113894 |
| <i>Molva molva</i>                 | Gadiformes         | GCA_900323295.1 | Scaffold   | 437.481 | -       | 111875 |
| <i>Mora moro</i>                   | Gadiformes         | GCA_900303205.1 | Scaffold   | 344.961 | -       | 100621 |

|                                        |                   |                 |            |         |         |        |
|----------------------------------------|-------------------|-----------------|------------|---------|---------|--------|
| <i>Muraenolepis marmoratus</i>         | Gadiformes        | GCA_900302325.1 | Scaffold   | 416.391 | -       | 138928 |
| <i>Phycis blennoides</i>               | Gadiformes        | GCA_900302315.1 | Scaffold   | 416.767 | -       | 62684  |
| <i>Phycis phycis</i>                   | Gadiformes        | GCA_900302335.1 | Scaffold   | 346.335 | -       | 100771 |
| <i>Pollachius virens</i>               | Gadiformes        | GCA_900312635.1 | Scaffold   | 394.928 | -       | 116705 |
| <i>Trachyrincus murrayi</i>            | Gadiformes        | GCA_900323305.1 | Scaffold   | 452.417 | -       | 40927  |
| <i>Trachyrincus scabrus</i>            | Gadiformes        | GCA_900303215.1 | Scaffold   | 369.862 | -       | 80958  |
| <i>Trisopterus minutus</i>             | Gadiformes        | GCA_900302415.1 | Scaffold   | 334.717 | -       | 106116 |
| <i>Boleophthalmus pectinirostris</i> * | Gobiiiformes      | GCF_000788275.1 | Scaffold   | 955.752 | 40.1001 | 16620  |
| <i>Lesueurigobius sanzi</i> *          | Gobiiiformes      | GCA_900303255.1 | Scaffold   | 810.626 | -       | 130360 |
| <i>Periophthalmus magnuspinnatus</i>   | Gobiiiformes      | GCA_000787105.1 | Scaffold   | 701.697 | 40      | 26060  |
| <i>Scartelaos histophorus</i>          | Gobiiiformes      | GCA_000787155.1 | Scaffold   | 695.009 | 39.1    | 156044 |
| <i>Periophthalmodon schlosseri</i>     | Gobiiiformes      | GCA_000787095.1 | Scaffold   | 679.761 | 40.2    | 46662  |
| <i>Electrophorus electricus</i> *      | Gymnotiformes     | GCF_003665695.1 | Scaffold   | 551.881 | 42.8    | 8786   |
| <i>Holocentrus rufus</i> *             | Holocentriiformes | GCA_900302615.1 | Scaffold   | 649.757 | -       | 58113  |
| <i>Myripristis jacobus</i> *           | Holocentriiformes | GCA_900302555.1 | Scaffold   | 720.397 | -       | 64974  |
| <i>Neoniphon sammara</i>               | Holocentriiformes | GCA_900302535.1 | Scaffold   | 659.226 | -       | 56655  |
| <i>Labrus bergylta</i> *               | Labriformes       | GCF_900080235.1 | Scaffold   | 805.481 | 40.9    | 13466  |
| <i>Symphodus melops</i> *              | Labriformes       | GCA_002819105.1 | Contig     | 614.569 | 41.6    | 5060   |
| <i>Lampris guttatus</i> *              | Lampridiformes    | GCA_900302545.1 | Scaffold   | 849.278 | 44.3    | 208230 |
| <i>Regalecus glesne</i> *              | Lampridiformes    | GCA_900302585.1 | Scaffold   | 656.004 | -       | 105196 |
| <i>Antennarius striatus</i>            | Lophiiformes      | GCA_900303275.1 | Scaffold   | 441.857 | 40.8    | 70398  |
| <i>Planiliza haematocheilus</i> *      | Mugiliformes      | GCA_005024645.1 | Contig     | 747.343 | 42.4    | 1453   |
| <i>Benthoosema glaciale</i> *          | Myctophiformes    | GCA_900323375.1 | Scaffold   | 676.314 | -       | 143923 |
| <i>Brotula barbata</i> *               | Ophidiiformes     | GCA_900303265.1 | Scaffold   | 485.061 | -       | 29854  |
| <i>Carapus acus</i>                    | Ophidiiformes     | GCA_900312935.1 | Scaffold   | 387.834 | -       | 46699  |
| <i>Lamprogrammus exutus</i> *          | Ophidiiformes     | GCA_900312555.1 | Scaffold   | 492.85  | -       | 120937 |
| <i>Chiloscyllium plagiosum</i>         | Orectolobiformes  | GCA_004010195.1 | Chromosome | 3776.55 | 42.0371 | 601049 |
| <i>Chiloscyllium punctatum</i>         | Orectolobiformes  | GCA_003427335.1 | Scaffold   | 3375.7  | 37.6    | 280241 |
| <i>Rhincodon typus</i>                 | Orectolobiformes  | GCF_001642345.1 | Scaffold   | 2931.6  | 41.8    | 57334  |
| <i>Osmerus eperlanus</i>               | Osmeriformes      | GCA_900302275.1 | Scaffold   | 342.759 | -       | 73274  |
| <i>Arapaima gigas</i>                  | Osteoglossiformes | GCA_900497675.1 | Scaffold   | 661.279 | -       | 5301   |
| <i>Paramormyrops kingsleyae</i> *      | Osteoglossiformes | GCF_002872115.1 | Scaffold   | 799.421 | 44.4    | 4667   |
| <i>Scleropages formosus</i>            | Osteoglossiformes | GCF_900964775.1 | Chromosome | 784.563 | 44.1597 | 72     |
| <i>Lateolabrax maculatus</i> *         | Pempheriformes    | GCA_004023545.1 | Chromosome | 519.239 | 41.0772 | 24     |
| <i>Gouania willdenowi</i> *            | Perciformes       | GCF_900634775.1 | Chromosome | 937.151 | 38.4531 | 441    |

|                                     |             |                 |            |         |         |        |
|-------------------------------------|-------------|-----------------|------------|---------|---------|--------|
| <i>Parablennius parvicornis</i>     | Perciformes | GCA_900302745.1 | Scaffold   | 599.249 | -       | 66539  |
| <i>Acanthochromis polyacanthus*</i> | Perciformes | GCF_002109545.1 | Scaffold   | 991.585 | 41.5    | 30414  |
| <i>Amphiprion ocellaris</i>         | Perciformes | GCF_002776465.1 | Scaffold   | 880.721 | 39.5001 | 6405   |
| <i>Amphiprion percula</i>           | Perciformes | GCA_003047355.2 | Chromosome | 908.956 | 39.5241 | 366    |
| <i>Anarrhichthys ocellatus*</i>     | Perciformes | GCA_004355925.1 | Scaffold   | 612.774 | 42.6    | 10816  |
| <i>Anoplopoma fimbria</i>           | Perciformes | GCA_000499045.1 | Contig     | 699.326 | 40.3    | 208506 |
| <i>Chaenocephalus aceratus</i>      | Perciformes | GCA_900302675.1 | Scaffold   | 623.452 | -       | 114963 |
| <i>Chromis chromis*</i>             | Perciformes | GCA_900302755.1 | Scaffold   | 834.429 | -       | 104482 |
| <i>Collichthys lucidus</i>          | Perciformes | GCA_004119915.1 | Chromosome | 877.615 | 41.8051 | 854    |
| <i>Cottoperca gobio</i>             | Perciformes | GCF_900634415.1 | Chromosome | 609.392 | 40.9976 | 322    |
| <i>Cottus rhenanus</i>              | Perciformes | GCA_001455555.1 | Scaffold   | 563.609 | 36.8    | 164693 |
| <i>Dicentrarchus labrax*</i>        | Perciformes | GCA_000689215.1 | Scaffold   | 675.917 | 40.4    | 25     |
| <i>Epinephelus lanceolatus*</i>     | Perciformes | GCA_005281545.1 | Chromosome | 1087.4  | 0.58246 | 4200   |
| <i>Epinephelus moara*</i>           | Perciformes | GCA_006386435.1 | Chromosome | 1030.46 | 41.53   | 4562   |
| <i>Gasterosteus aculeatus</i>       | Perciformes | GCA_006229165.1 | Scaffold   | 467.45  | 43.5    | 10242  |
| <i>Hypoplectrus puella*</i>         | Perciformes | GCA_900610375.1 | Scaffold   | 612.29  | 39.5    | 14375  |
| <i>Larimichthys crocea</i>          | Perciformes | GCF_000972845.2 | Chromosome | 657.94  | 41.3589 | 9998   |
| <i>Lates calcarifer</i>             | Perciformes | GCF_001640805.1 | Scaffold   | 668.481 | 40.8001 | 3808   |
| <i>Liparis tanakae</i>              | Perciformes | GCA_006348945.1 | Scaffold   | 498.98  | 40.7    | 27878  |
| <i>Miichthys miiuy</i>              | Perciformes | GCA_001593715.1 | Scaffold   | 619.301 | 39.3    | 6294   |
| <i>Morone chrysops</i>              | Perciformes | GCA_003610055.1 | Scaffold   | 620.984 | 40      | 84096  |
| <i>Morone saxatilis*</i>            | Perciformes | GCA_004916995.1 | Scaffold   | 598.11  | 39.8    | 629    |
| <i>Myoxocephalus scorpius</i>       | Perciformes | GCA_900312955.1 | Scaffold   | 520.316 | 41.9    | 85863  |
| <i>Nibea albiflora</i>              | Perciformes | GCA_900327885.1 | Scaffold   | 574.466 | -       | 11977  |
| <i>Notothenia coriiceps</i>         | Perciformes | GCF_000735185.1 | Scaffold   | 636.614 | 40.8002 | 38657  |
| <i>Ophiodon elongatus</i>           | Perciformes | GCA_004358465.1 | Scaffold   | 635.568 | 42.3    | 18379  |
| <i>Parambassis ranga</i>            | Perciformes | GCF_900634625.1 | Chromosome | 551.013 | 42.5376 | 156    |
| <i>Perca flavescens*</i>            | Perciformes | GCF_004354835.1 | Chromosome | 877.456 | 40.8426 | 268    |
| <i>Perca fluviatilis*</i>           | Perciformes | GCA_003412525.1 | Scaffold   | 958.225 | 45.1    | 31105  |
| <i>Pseudochromis fuscus*</i>        | Perciformes | GCA_900323345.1 | Scaffold   | 657.041 | -       | 52042  |
| <i>Pungitius pungitius</i>          | Perciformes | GCA_003399555.1 | Scaffold   | 441.09  | 37.9    | 7847   |
| <i>Sebastes aleutianus*</i>         | Perciformes | GCA_001910805.2 | Scaffold   | 899.65  | 40.9    | 10489  |
| <i>Sebastes koreanus*</i>           | Perciformes | GCA_004335335.1 | Contig     | 725.092 | 40.6    | 147157 |
| <i>Sebastes minor*</i>              | Perciformes | GCA_001910765.2 | Scaffold   | 681.653 | 40.8    | 166448 |
| <i>Sebastes nigrocinctus*</i>       | Perciformes | GCA_000475235.3 | Scaffold   | 746.045 | 40.8    | 15872  |

|                                       |                   |                 |            |         |         |         |
|---------------------------------------|-------------------|-----------------|------------|---------|---------|---------|
| <i>Sebastes norvegicus</i> *          | Perciformes       | GCA_900302655.1 | Scaffold   | 717.741 | -       | 75627   |
| <i>Sebastes nudus</i> *               | Perciformes       | GCA_004335365.1 | Contig     | 724.045 | 40.6    | 180312  |
| <i>Sebastes rubrivinctus</i> *        | Perciformes       | GCA_000475215.1 | Scaffold   | 756.297 | 40.7    | 68206   |
| <i>Sebastes schlegelii</i> *          | Perciformes       | GCA_004335315.1 | Contig     | 728.477 | 40.6    | 146105  |
| <i>Sebastes steindachneri</i> *       | Perciformes       | GCA_001910785.2 | Scaffold   | 648.011 | 40.7    | 279232  |
| <i>Stegastes partitus</i> *           | Perciformes       | GCF_000690725.1 | Scaffold   | 800.492 | 42.1    | 5818    |
| <i>Pseudoliparis sp. Yap Trench</i>   | Perciformes       | GCA_004335475.1 | Scaffold   | 840.641 | 43.8    | 3134    |
| <i>Percopsis transmontana</i>         | Percopsiformes    | GCA_900302285.1 | Scaffold   | 458.089 | -       | 53197   |
| <i>Typhlichthys subterraneus</i> *    | Percopsiformes    | GCA_900302405.1 | Scaffold   | 555.56  | 41.6    | 84841   |
| <i>Cynoglossus semilaevis</i> *       | Pleuronectiformes | GCF_000523025.1 | Chromosome | 470.199 | 41.2788 | 31181   |
| <i>Paralichthys olivaceus</i>         | Pleuronectiformes | GCF_001970005.1 | Scaffold   | 643.911 | 43.2001 | 9525    |
| <i>Pseudopleuronectes yokohamae</i> * | Pleuronectiformes | GCA_000787555.1 | Contig     | 547.831 | 42      | 525502  |
| <i>Reinhardtius hippoglossoides</i> * | Pleuronectiformes | GCA_006182925.1 | Scaffold   | 677.54  | 42.7    | 4,453   |
| <i>Scophthalmus maximus</i> *         | Pleuronectiformes | GCA_003186165.1 | Chromosome | 524.979 | 43.431  | 22      |
| <i>Polymixia japonica</i>             | Polymixiiformes   | GCA_900302305.1 | Scaffold   | 554.896 | 42.6    | 92198   |
| <i>Erpetoichthys calabaricus</i>      | Polypteriformes   | GCF_900747795.1 | Chromosome | 3811.04 | 39.4067 | 1885    |
| <i>Leucoraja erinacea</i>             | Rajiformes        | GCA_000238235.1 | Contig     | 1555.46 | 40.3    | 2962366 |
| <i>Hucho hucho</i> *                  | Salmoniformes     | GCA_003317085.1 | Scaffold   | 2487.55 | 32.9    | 71639   |
| <i>Oncorhynchus kisutch</i> *         | Salmoniformes     | GCF_002021735.1 | Chromosome | 2369.93 | 43.6225 | 22813   |
| <i>Oncorhynchus mykiss</i> *          | Salmoniformes     | GCF_002163495.1 | Chromosome | 2179    | 43.4875 | 139800  |
| <i>Oncorhynchus nerka</i> *           | Salmoniformes     | GCF_006149115.1 | Chromosome | 1927.14 | 43.63   | 38027   |
| <i>Oncorhynchus tshawytscha</i> *     | Salmoniformes     | GCF_002872995.1 | Chromosome | 2425.71 | 43.7341 | 15946   |
| <i>Salmo salar</i> *                  | Salmoniformes     | GCF_000233375.1 | Chromosome | 2966.89 | 43.8912 | 241573  |
| <i>Salmo trutta</i> *                 | Salmoniformes     | GCF_901001165.1 | Chromosome | 2371.88 | 43.57   | 1441    |
| <i>Salvelinus alpinus</i> *           | Salmoniformes     | GCF_002910315.2 | Chromosome | 2169.55 | 43.6053 | 16702   |
| <i>Thymallus thymallus</i> *          | Salmoniformes     | GCA_004348285.1 | Chromosome | 1564.83 | 41.9651 | 3831    |
| <i>Pampus argenteus</i> *             | Scombriformes     | GCA_000697985.1 | Scaffold   | 350.449 | 38.2    | 298139  |
| <i>Thunnus albacares</i> *            | Scombriformes     | GCA_900302625.1 | Scaffold   | 728.212 | -       | 38995   |
| <i>Thunnus orientalis</i> *           | Scombriformes     | GCA_000418415.1 | Contig     | 684.497 | 39.7    | 133062  |
| <i>Thunnus thynnus</i> *              | Scombriformes     | GCA_003231725.1 | Scaffold   | 648.209 | 39.3    | 354425  |
| <i>Lepisosteus oculatus</i> *         | Semionotiformes   | GCF_000242695.1 | Chromosome | 945.878 | 40.4083 | 2106    |
| <i>Ageneiosus marmoratus</i> *        | Siluriformes      | GCA_003347165.1 | Scaffold   | 1030    | 26.5    | 16063   |
| <i>Clarias batrachus</i> *            | Siluriformes      | GCA_003987875.1 | Scaffold   | 821.75  | -       | 10042   |
| <i>Ictalurus punctatus</i> *          | Siluriformes      | GCF_001660625.1 | Chromosome | 783.275 | 39.8391 | 9975    |
| <i>Pangasianodon hypophthalmus</i> *  | Siluriformes      | GCF_003671635.1 | Scaffold   | 715.76  | 39.0001 | 567     |

|               |                                  |                   |                 |            |         |         |        |
|---------------|----------------------------------|-------------------|-----------------|------------|---------|---------|--------|
|               | <i>Tachysurus fulvidraco</i> *   | Siluriformes      | GCF_003724035.1 | Scaffold   | 713.811 | 39.6001 | 663    |
|               | <i>Pagrus major</i> *            | Spariformes       | GCA_002897255.1 | Scaffold   | 875.465 | 38      | 886260 |
|               | <i>Sparus aurata</i> *           | Spariformes       | GCA_003309015.1 | Chromosome | 830.382 | 41.5049 | 34642  |
|               | <i>SpondylIOSoma cantharus</i> * | Spariformes       | GCA_900302685.1 | Scaffold   | 680.472 | -       | 47064  |
|               | <i>Borostomias antarcticus</i> * | Stomiiformes      | GCA_900323325.1 | Scaffold   | 430.363 | -       | 104734 |
|               | <i>Stylephorus chordatus</i> *   | Stylephoriformes  | GCA_900312615.1 | Scaffold   | 488.489 | -       | 128468 |
|               | <i>Mastacembelus armatus</i> *   | Synbranchiformes  | GCF_900324485.1 | Scaffold   | 593.082 | 40.9001 | 126    |
|               | <i>Monopterus albus</i> *        | Synbranchiformes  | GCF_001952655.1 | Scaffold   | 684.144 | 41.5001 | 20622  |
|               | <i>Hippocampus comes</i>         | Syngnathiformes   | GCF_001891065.1 | Scaffold   | 493.776 | 43.6998 | 37377  |
|               | <i>Syngnathus acus</i>           | Syngnathiformes   | GCA_901709675.1 | Chromosome | 324.33  | 43.45   | 87     |
|               | <i>Mola mola</i> *               | Tetraodontiformes | GCA_001698575.1 | Scaffold   | 639.452 | 41.2    | 5552   |
|               | <i>Takifugu bimaculatus</i>      | Tetraodontiformes | GCA_004026145.1 | Chromosome | 371.676 | 45.4074 | 22     |
|               | <i>Takifugu flavidus</i>         | Tetraodontiformes | GCA_003711565.1 | Chromosome | 366.288 | 45.623  | 867    |
|               | <i>Takifugu rubripes</i>         | Tetraodontiformes | GCF_000180615.1 | Chromosome | 391.485 | 45.8414 | 7091   |
|               | <i>Tetraodon nigroviridis</i>    | Tetraodontiformes | GCA_000180735.1 | Scaffold   | 342.403 | 46.6    | 25773  |
|               | <i>Cyttopsis rosea</i> *         | Zeiformes         | GCA_900302355.1 | Scaffold   | 546.506 | 43      | 111974 |
|               | <i>Zeus faber</i> *              | Zeiformes         | GCA_900323335.1 | Scaffold   | 610.433 | -       | 135758 |
| mammals (336) | <i>Chrysochloris asiatica</i>    | Afrosoricida      | GCF_000296735.1 | Scaffold   | 4210.11 | 41.8    | 20500  |
|               | <i>Echinops telfairi</i>         | Afrosoricida      | GCF_000313985.1 | Scaffold   | 2947.02 | 43.6    | 8402   |
|               | <i>Microgale talazaci</i>        | Afrosoricida      | GCA_004026705.1 | Scaffold   | 3236.15 | 43      | 788895 |
|               | <i>Acinonyx jubatus</i>          | Carnivora         | GCF_003709585.1 | Scaffold   | 2384.85 | 41.6    | 3220   |
|               | <i>Ailuropoda melanoleuca</i>    | Carnivora         | GCF_000004335.2 | Scaffold   | 2299.51 | 41.7    | 81467  |
|               | <i>Ailurus fulgens styani</i>    | Carnivora         | GCA_002007465.1 | Scaffold   | 2342.94 | -       | 11589  |
|               | <i>Callorhinus ursinus</i>       | Carnivora         | GCF_003265705.1 | Scaffold   | 2706.87 | 41.6    | 14230  |
|               | <i>Canis lupus dingo</i>         | Carnivora         | GCF_003254725.1 | Scaffold   | 2439.83 | 41.4    | 2444   |
|               | <i>Canis lupus familiaris</i>    | Carnivora         | GCF_000002285.3 | Chromosome | 2410.98 | 41.3022 | 3310   |
|               | <i>Cryptoprocta ferox</i>        | Carnivora         | GCA_004023885.1 | Scaffold   | 2458.85 | 41.5    | 464036 |
|               | <i>Enhydra lutris kenyoni</i>    | Carnivora         | GCF_002288905.1 | Scaffold   | 2455.28 | 41.6    | 6771   |
|               | <i>Eumetopias jubatus</i>        | Carnivora         | GCF_004028035.1 | Scaffold   | 2418.26 | 41.4    | 7472   |
|               | <i>Felis catus</i>               | Carnivora         | GCF_000181335.3 | Chromosome | 2521.86 | 41.8806 | 4525   |
|               | <i>Felis nigripes</i>            | Carnivora         | GCA_004023925.1 | Scaffold   | 2428.42 | 41.9    | 590124 |
|               | <i>Gulo gulo</i>                 | Carnivora         | GCA_900006375.2 | Scaffold   | 2423.18 | 37.6    | 47417  |
|               | <i>Helogale parvula</i>          | Carnivora         | GCA_004023845.1 | Scaffold   | 2392.47 | 41.8    | 189370 |
|               | <i>Hyaena hyaena</i>             | Carnivora         | GCA_003009895.1 | Scaffold   | 2374.72 | 41.3    | 5760   |
|               | <i>Leptonychotes weddellii</i>   | Carnivora         | GCF_000349705.1 | Scaffold   | 3156.9  | 43.8    | 16711  |

|                                            |                 |                 |            |         |         |         |
|--------------------------------------------|-----------------|-----------------|------------|---------|---------|---------|
| <i>Lycaon pictus</i>                       | Carnivora       | GCA_001887905.1 | Chromosome | 2358.14 | 41.1817 | 803     |
| <i>Lynx pardinus</i>                       | Carnivora       | GCA_900661375.1 | Scaffold   | 2413.21 | 46.3    | 41700   |
| <i>Mellivora capensis</i>                  | Carnivora       | GCA_004024625.1 | Scaffold   | 3091.17 | 42      | 2068312 |
| <i>Mirounga angustirostris</i>             | Carnivora       | GCA_004023865.1 | Scaffold   | 2407.32 | 41.5    | 321256  |
| <i>Mungos mungo</i>                        | Carnivora       | GCA_004023785.1 | Scaffold   | 2448.21 | 42      | 312364  |
| <i>Mustela putorius furo</i>               | Carnivora       | GCF_000215625.1 | Scaffold   | 2410.88 | 41.9    | 7783    |
| <i>Neomonachus schauinslandi</i>           | Carnivora       | GCF_002201575.1 | Scaffold   | 2400.93 | 41.6    | 7873    |
| <i>Neovison vison</i>                      | Carnivora       | GCA_900108605.1 | Scaffold   | 2447.19 | -       | 7175    |
| <i>Odobenus rosmarus divergens</i>         | Carnivora       | GCF_000321225.1 | Scaffold   | 2400.15 | 41.7    | 3893    |
| <i>Panthera onca</i>                       | Carnivora       | GCA_004023805.1 | Scaffold   | 2504.53 | 41.7    | 438792  |
| <i>Panthera pardus</i>                     | Carnivora       | GCF_001857705.1 | Scaffold   | 2578.02 | 41.9    | 50377   |
| <i>Panthera tigris altaica</i>             | Carnivora       | GCF_000464555.1 | Scaffold   | 2391.08 | 41.5    | 1479    |
| <i>Paradoxurus hermaphroditus</i>          | Carnivora       | GCA_004024585.1 | Scaffold   | 2477.23 | 42.5    | 438125  |
| <i>Phoca vitulina</i>                      | Carnivora       | GCA_004348235.1 | Scaffold   | 2363.59 | 41.4    | 5542    |
| <i>Prionailurus bengalensis euptilurus</i> | Carnivora       | GCA_005406085.1 | Scaffold   | 2435.35 | 41.1    | 65356   |
| <i>Pteronura brasiliensis</i>              | Carnivora       | GCA_004024605.1 | Scaffold   | 2602.28 | 41.7    | 644728  |
| <i>Puma concolor</i>                       | Carnivora       | GCF_003327715.1 | Scaffold   | 2432.97 | 41.8    | 2175    |
| <i>Spilogale gracilis</i>                  | Carnivora       | GCA_004023965.1 | Scaffold   | 2463.32 | 41.6    | 422009  |
| <i>Suricata suricatta</i>                  | Carnivora       | GCA_004023905.1 | Scaffold   | 2471.81 | 41.9    | 349868  |
| <i>Taxidea taxus jeffersonii</i>           | Carnivora       | GCA_003697995.1 | Scaffold   | 2416.01 | 41.2    | 145161  |
| <i>Ursus americanus</i>                    | Carnivora       | GCA_003344425.1 | Scaffold   | 2588.39 | 39.5    | 111495  |
| <i>Ursus arctos horribilis</i>             | Carnivora       | GCF_003584765.1 | Scaffold   | 2328.66 | 41.9    | 6673    |
| <i>Ursus maritimus</i>                     | Carnivora       | GCF_000687225.1 | Scaffold   | 2301.38 | 41.7    | 23819   |
| <i>Vulpes lagopus</i>                      | Carnivora       | GCA_004023825.1 | Scaffold   | 2688.56 | 41.9    | 1263345 |
| <i>Vulpes vulpes</i>                       | Carnivora       | GCF_003160815.1 | Scaffold   | 2421.57 | 41.3    | 82424   |
| <i>Zalophus californianus</i>              | Carnivora       | GCF_900631625.1 | Scaffold   | 2372.37 | 41.4    | 10423   |
| <i>Aepyceros melampus</i>                  | Cetartiodactyla | GCA_006408695.1 | Scaffold   | 2631.3  | 41.4    | 24102   |
| <i>Alcelaphus buselaphus</i>               | Cetartiodactyla | GCA_006408545.1 | Scaffold   | 3882.34 | 9.3     | 539659  |
| <i>Ammotragus lervia</i>                   | Cetartiodactyla | GCA_002201775.1 | Scaffold   | 2650.84 | 40.3    | 77320   |
| <i>Axis porcinus</i>                       | Cetartiodactyla | GCA_003798545.1 | Scaffold   | 2676.16 | 41      | 136093  |
| <i>Balaenoptera acutorostrata scammoni</i> | Cetartiodactyla | GCF_000493695.1 | Scaffold   | 2431.69 | 41.4    | 10776   |
| <i>Balaenoptera bonaerensis</i>            | Cetartiodactyla | GCA_000978805.1 | Scaffold   | 2234.64 | 40.7    | 421444  |
| <i>Beatragus hunteri</i>                   | Cetartiodactyla | GCA_004027495.1 | Scaffold   | 2697.26 | 42.3    | 535889  |
| <i>Bison bison bison</i>                   | Cetartiodactyla | GCF_000754665.1 | Scaffold   | 2828.03 | 42.2    | 128431  |
| <i>Bos grunniens</i>                       | Cetartiodactyla | GCA_005887515.1 | Chromosome | 2832.78 | 41.966  | 414     |



|                                   |                 |                 |            |         |         |         |
|-----------------------------------|-----------------|-----------------|------------|---------|---------|---------|
| <i>Bos indicus</i>                | Cetartiodactyla | GCF_000247795.1 | Chromosome | 2673.97 | 42.3689 | 32      |
| <i>Bos mutus</i>                  | Cetartiodactyla | GCF_000298355.1 | Scaffold   | 2645.16 | 42      | 41192   |
| <i>Bos taurus</i>                 | Cetartiodactyla | GCF_002263795.1 | Chromosome | 2715.85 | 41.9362 | 2211    |
| <i>Bubalus bubalis</i>            | Cetartiodactyla | GCF_003121395.1 | Chromosome | 2655.78 | 41.814  | 509     |
| <i>Camelus bactrianus</i>         | Cetartiodactyla | GCF_000767855.1 | Scaffold   | 1992.66 | 41.4    | 35455   |
| <i>Camelus dromedarius</i>        | Cetartiodactyla | GCF_000767585.1 | Scaffold   | 2004.06 | 41.3    | 32573   |
| <i>Camelus ferus</i>              | Cetartiodactyla | GCF_000311805.1 | Scaffold   | 2009.19 | 41.3    | 13334   |
| <i>Capra aegagrus</i>             | Cetartiodactyla | GCA_000978405.1 | Chromosome | 2828.87 | 42.4124 | 89498   |
| <i>Capra hircus</i>               | Cetartiodactyla | GCF_001704415.1 | Chromosome | 2922.81 | 43.1505 | 29907   |
| <i>Capra ibex</i>                 | Cetartiodactyla | GCA_006410555.1 | Scaffold   | 2701.36 | 42.2    | 55914   |
| <i>Capra sibirica</i>             | Cetartiodactyla | GCA_003182615.2 | Scaffold   | 2733.03 | 42.2    | 85609   |
| <i>Capreolus capreolus</i>        | Cetartiodactyla | GCA_000751575.1 | Scaffold   | 2785.38 | 41.8    | 3088511 |
| <i>Catagonus wagneri</i>          | Cetartiodactyla | GCA_004024745.1 | Scaffold   | 2593.59 | 42.3    | 1230162 |
| <i>Cephalophus harveyi</i>        | Cetartiodactyla | GCA_006410635.1 | Scaffold   | 2816.64 | 41.1    | 85160   |
| <i>Cervus elaphus hippelaphus</i> | Cetartiodactyla | GCA_002197005.1 | Chromosome | 3438.62 | 44.8578 | 11479   |
| <i>Connochaetes taurinus</i>      | Cetartiodactyla | GCA_006408615.1 | Scaffold   | 2644.04 | 41.1    | 78350   |
| <i>Damaliscus lunatus</i>         | Cetartiodactyla | GCA_006408505.1 | Scaffold   | 3127.76 | 39      | 92109   |
| <i>Delphinapterus leucas</i>      | Cetartiodactyla | GCF_002288925.1 | Scaffold   | 2358.52 | 41.3    | 6972    |
| <i>Elaphurus davidianus</i>       | Cetartiodactyla | GCA_002443075.1 | Scaffold   | 2584.69 | 40.5    | 194812  |
| <i>Eschrichtius robustus</i>      | Cetartiodactyla | GCA_002189225.1 | Scaffold   | 2849.45 | 30.7    | 57203   |
| <i>Eubalaena japonica</i>         | Cetartiodactyla | GCA_004363455.1 | Scaffold   | 2693.58 | 41.1    | 1353963 |
| <i>Eudorcas thomsonii</i>         | Cetartiodactyla | GCA_006408755.1 | Scaffold   | 2904.27 | 41.7    | 123308  |
| <i>Giraffa camelopardalis</i>     | Cetartiodactyla | GCA_006408565.1 | Scaffold   | 2473.18 | 40.2    | 78945   |
| <i>Giraffa tippelskirchi</i>      | Cetartiodactyla | GCA_001651235.1 | Scaffold   | 2705.07 | 41.4    | 513177  |
| <i>Hemitragus hylocrius</i>       | Cetartiodactyla | GCA_004026825.1 | Scaffold   | 2715.04 | 42.4    | 469163  |
| <i>Hippopotamus amphibius</i>     | Cetartiodactyla | GCA_002995585.1 | Scaffold   | 2425.75 | 38.8    | 128772  |
| <i>Hydropotes inermis</i>         | Cetartiodactyla | GCA_006459105.1 | Scaffold   | 2530.18 | 40.7    | 22246   |
| <i>Inia geoffrensis</i>           | Cetartiodactyla | GCA_004363515.1 | Scaffold   | 2596.28 | 42.1    | 1213610 |
| <i>Kobus ellipsiprymnus</i>       | Cetartiodactyla | GCA_006410655.1 | Scaffold   | 2895.34 | 39.6    | 88848   |
| <i>Kogia breviceps</i>            | Cetartiodactyla | GCA_004363705.1 | Scaffold   | 2759.7  | 41.9    | 1252072 |
| <i>Lagenorhynchus obliquidens</i> | Cetartiodactyla | GCF_003676395.1 | Scaffold   | 2334.47 | 41.3    | 5422    |
| <i>Lipotes vexillifer</i>         | Cetartiodactyla | GCF_000442215.1 | Scaffold   | 2429.21 | 41.4    | 30713   |
| <i>Litocranius walleri</i>        | Cetartiodactyla | GCA_006410535.1 | Scaffold   | 2979.34 | 40.4    | 79667   |
| <i>Madoqua kirkii</i>             | Cetartiodactyla | GCA_006408675.1 | Scaffold   | 2648.13 | 42      | 216116  |
| <i>Megaptera novaeangliae</i>     | Cetartiodactyla | GCA_004329385.1 | Scaffold   | 2265.79 | 38.6    | 2558    |

|                                                    |                 |                 |            |         |         |         |
|----------------------------------------------------|-----------------|-----------------|------------|---------|---------|---------|
| <i>Mesoplodon bidens</i>                           | Cetartiodactyla | GCA_004027085.1 | Scaffold   | 2797.69 | 41.7    | 1801720 |
| <i>Monodon monoceros</i>                           | Cetartiodactyla | GCF_005190385.1 | Scaffold   | 2355.57 | 41      | 6972    |
| <i>Moschus berezovskii</i>                         | Cetartiodactyla | GCA_006459085.1 | Scaffold   | 2818.01 | 39.8    | 77520   |
| <i>Moschus chrysogaster</i>                        | Cetartiodactyla | GCA_006461725.1 | Scaffold   | 4972.48 | 19.4    | 127198  |
| <i>Moschus moschiferus</i>                         | Cetartiodactyla | GCA_004024705.1 | Scaffold   | 2966.36 | 42.3    | 1175703 |
| <i>Muntiacus crinifrons</i>                        | Cetartiodactyla | GCA_006408485.1 | Scaffold   | 2681.2  | 41.5    | 21054   |
| <i>Muntiacus muntjak</i>                           | Cetartiodactyla | GCA_006409035.1 | Scaffold   | 2703.71 | 40.1    | 383561  |
| <i>Muntiacus reevesi</i>                           | Cetartiodactyla | GCA_006408525.1 | Scaffold   | 2601.89 | 40.9    | 200261  |
| <i>Nanger granti</i>                               | Cetartiodactyla | GCA_006408635.1 | Scaffold   | 3032.78 | 35.7    | 62189   |
| <i>Neophocaena asiaeorientalis asiaeorientalis</i> | Cetartiodactyla | GCF_003031525.1 | Scaffold   | 2284.63 | 41.3    | 13699   |
| <i>Neotragus moschatus</i>                         | Cetartiodactyla | GCA_006410615.1 | Scaffold   | 2675.73 | 40.9    | 218204  |
| <i>Neotragus pygmaeus</i>                          | Cetartiodactyla | GCA_006410875.1 | Scaffold   | 2895.87 | 40.5    | 354089  |
| <i>Odocoileus hemionus hemionus</i>                | Cetartiodactyla | GCA_004115125.1 | Scaffold   | 2343.7  | 36.9    | 16208   |
| <i>Odocoileus virginianus texanus</i>              | Cetartiodactyla | GCF_002102435.1 | Scaffold   | 2380.51 | 41.6    | 17026   |
| <i>Okapia johnstoni</i>                            | Cetartiodactyla | GCA_001660835.1 | Scaffold   | 2878.13 | 41.5    | 837179  |
| <i>Orcinus orca</i>                                | Cetartiodactyla | GCF_000331955.2 | Scaffold   | 2372.92 | 41.7    | 1668    |
| <i>Oreotragus oreotragus</i>                       | Cetartiodactyla | GCA_006410675.1 | Scaffold   | 3247.63 | 37.7    | 24892   |
| <i>Oryx gazella</i>                                | Cetartiodactyla | GCA_003945745.1 | Scaffold   | 2762.92 | 39      | 31177   |
| <i>Ourebia ourebi</i>                              | Cetartiodactyla | GCA_006417275.1 | Scaffold   | 2524.87 | 42      | 3508661 |
| <i>Ovis ammon</i>                                  | Cetartiodactyla | GCA_003121645.1 | Scaffold   | 2643.43 | 41.6    | 41955   |
| <i>Ovis aries</i>                                  | Cetartiodactyla | GCF_002742125.1 | Chromosome | 2869.91 | 41.9088 | 2641    |
| <i>Ovis canadensis</i>                             | Cetartiodactyla | GCA_004026945.1 | Scaffold   | 2863.66 | 43.2    | 1048136 |
| <i>Pantholops hodgsonii</i>                        | Cetartiodactyla | GCF_000400835.1 | Scaffold   | 2696.89 | 42.4    | 15059   |
| <i>Philantomba maxwellii</i>                       | Cetartiodactyla | GCA_006410695.1 | Scaffold   | 3145.94 | 30.5    | 25633   |
| <i>Phocoena phocoena</i>                           | Cetartiodactyla | GCA_003071005.1 | Scaffold   | 2441.14 | 37.2    | 142029  |
| <i>Physeter catodon</i>                            | Cetartiodactyla | GCF_002837175.2 | Chromosome | 2512.15 | 41.7225 | 14677   |
| <i>Platanista minor</i>                            | Cetartiodactyla | GCA_004363435.1 | Scaffold   | 2671.07 | 41.7    | 1098790 |
| <i>Pontoporia blainvillei</i>                      | Cetartiodactyla | GCA_004363935.1 | Scaffold   | 1685.1  | 46.7    | 1885058 |
| <i>Procapra przewalskii</i>                        | Cetartiodactyla | GCA_006410515.1 | Scaffold   | 2692.99 | 40.7    | 274130  |
| <i>Przewalskium albirostris</i>                    | Cetartiodactyla | GCA_006408465.1 | Scaffold   | 2692.23 | 41.1    | 171874  |
| <i>Pseudois nayaur</i>                             | Cetartiodactyla | GCA_003182575.1 | Scaffold   | 2584.17 | 42.1    | 214772  |
| <i>Rangifer tarandus</i>                           | Cetartiodactyla | GCA_004026565.1 | Scaffold   | 2897.3  | 42.1    | 1360739 |
| <i>Raphicerus campestris</i>                       | Cetartiodactyla | GCA_006410735.1 | Scaffold   | 3137.86 | 34.8    | 57517   |
| <i>Redunca redunca</i>                             | Cetartiodactyla | GCA_006410935.1 | Scaffold   | 2724.98 | 41.3    | 534502  |
| <i>Saiga tatarica</i>                              | Cetartiodactyla | GCA_004024985.1 | Scaffold   | 2876.19 | 42.5    | 1772199 |

|                                    |                 |                 |            |         |        |         |
|------------------------------------|-----------------|-----------------|------------|---------|--------|---------|
| <i>Sousa chinensis</i>             | Cetartiodactyla | GCA_003521335.2 | Scaffold   | 2339.09 | 40.9   | 20903   |
| <i>Sus scrofa</i>                  | Cetartiodactyla | GCF_000003025.6 | Chromosome | 2501.91 | 41.971 | 706     |
| <i>Sylvicapra grimmia</i>          | Cetartiodactyla | GCA_006408735.1 | Scaffold   | 3145.09 | 34.8   | 22324   |
| <i>Syncerus caffer</i>             | Cetartiodactyla | GCA_006408785.1 | Scaffold   | 2929.43 | 40.9   | 148371  |
| <i>Tragelaphus buxtoni</i>         | Cetartiodactyla | GCA_006411685.1 | Scaffold   | 3267.49 | 36.2   | 2910462 |
| <i>Tragelaphus eurycerus</i>       | Cetartiodactyla | GCA_006410755.1 | Scaffold   | 2962.04 | 36.2   | 1539703 |
| <i>Tragelaphus imberbis</i>        | Cetartiodactyla | GCA_006410775.1 | Scaffold   | 4038.24 | 32.5   | 272415  |
| <i>Tragelaphus scriptus</i>        | Cetartiodactyla | GCA_006410495.1 | Scaffold   | 2873.33 | 40.2   | 237860  |
| <i>Tragelaphus spekii</i>          | Cetartiodactyla | GCA_006411015.1 | Scaffold   | 3725.95 | 36.2   | 1769205 |
| <i>Tragelaphus strepsiceros</i>    | Cetartiodactyla | GCA_006410795.1 | Scaffold   | 2867.75 | 40.7   | 320432  |
| <i>Tragulus javanicus</i>          | Cetartiodactyla | GCA_004024965.1 | Scaffold   | 2582.63 | 42.7   | 1156990 |
| <i>Tragulus kanchil</i>            | Cetartiodactyla | GCA_006408655.1 | Scaffold   | 3053.42 | 33.9   | 185856  |
| <i>Tursiops aduncus</i>            | Cetartiodactyla | GCA_003227395.1 | Scaffold   | 2503.93 | -      | 16249   |
| <i>Tursiops truncatus</i>          | Cetartiodactyla | GCF_001922835.1 | Scaffold   | 2132.52 | 40.9   | 2648    |
| <i>Vicugna pacos</i>               | Cetartiodactyla | GCF_000164845.2 | Scaffold   | 2172.21 | 41.7   | 276725  |
| <i>Ziphius cavirostris</i>         | Cetartiodactyla | GCA_004364475.1 | Scaffold   | 3150.42 | 42     | 3758276 |
| <i>Antilocapra marsupialis</i>     | Cetartiodactyla | GCA_006408585.1 | Scaffold   | 3024.61 | 38.9   | 94522   |
| <i>Antilocapra americana</i>       | Cetartiodactyla | GCA_004027515.1 | Scaffold   | 2899.77 | 42     | 1643131 |
| <i>Artibeus jamaicensis</i>        | Chiroptera      | GCA_004027435.1 | Scaffold   | 2424.78 | 42.2   | 794376  |
| <i>Carollia perspicillata</i>      | Chiroptera      | GCA_004027735.1 | Scaffold   | 2689.41 | 42.7   | 1925339 |
| <i>Craseonycteris thonglongyai</i> | Chiroptera      | GCA_004027555.1 | Scaffold   | 2272.09 | 41     | 1224256 |
| <i>Desmodus rotundus</i>           | Chiroptera      | GCF_002940915.1 | Scaffold   | 2063.81 | 42.3   | 29801   |
| <i>Eidolon helvum</i>              | Chiroptera      | GCA_000465285.1 | Scaffold   | 1837.75 | 39.2   | 133538  |
| <i>Eonycteris spelaea</i>          | Chiroptera      | GCA_003508835.1 | Contig     | 1966.86 | 40.3   | 4469    |
| <i>Eptesicus fuscus</i>            | Chiroptera      | GCF_000308155.1 | Scaffold   | 2026.63 | 43.5   | 6789    |
| <i>Hipposideros armiger</i>        | Chiroptera      | GCF_001890085.1 | Scaffold   | 2236.58 | 42.2   | 7571    |
| <i>Hipposideros galeritus</i>      | Chiroptera      | GCA_004027415.1 | Scaffold   | 2440.75 | 41.3   | 840200  |
| <i>Lasiurus borealis</i>           | Chiroptera      | GCA_004026805.1 | Scaffold   | 2857.59 | 42.7   | 518900  |
| <i>Macroglossus sobrinus</i>       | Chiroptera      | GCA_004027375.1 | Scaffold   | 1897.64 | 39.6   | 171985  |
| <i>Megaderma lyra</i>              | Chiroptera      | GCA_004026885.1 | Scaffold   | 2620.95 | 40.8   | 1902801 |
| <i>Micronycteris hirsuta</i>       | Chiroptera      | GCA_004026765.1 | Scaffold   | 2314.65 | 42.4   | 550090  |
| <i>Miniopterus natalensis</i>      | Chiroptera      | GCF_001595765.1 | Scaffold   | 1803.1  | 42.4   | 1269    |
| <i>Miniopterus schreibersii</i>    | Chiroptera      | GCA_004026525.1 | Scaffold   | 1775.85 | 42.3   | 177620  |
| <i>Mormoops blainvillei</i>        | Chiroptera      | GCA_004026545.1 | Scaffold   | 2111.75 | 41.7   | 205259  |
| <i>Murina aurata feae</i>          | Chiroptera      | GCA_004026665.1 | Scaffold   | 2331.55 | 43.8   | 880177  |

|                                  |                 |                 |            |         |         |         |
|----------------------------------|-----------------|-----------------|------------|---------|---------|---------|
| <i>Myotis brandtii</i>           | Chiroptera      | GCF_000412655.1 | Scaffold   | 2107.24 | 42.9    | 169750  |
| <i>Myotis davidii</i>            | Chiroptera      | GCF_000327345.1 | Scaffold   | 2059.8  | 43.1    | 101769  |
| <i>Myotis lucifugus</i>          | Chiroptera      | GCF_000147115.1 | Scaffold   | 2034.58 | 42.7    | 11654   |
| <i>Myotis myotis</i>             | Chiroptera      | GCA_004026985.1 | Scaffold   | 2294.47 | 43.2    | 1045197 |
| <i>Noctilio leporinus</i>        | Chiroptera      | GCA_004026585.1 | Scaffold   | 2098.5  | 40.9    | 298222  |
| <i>Phyllostomus discolor</i>     | Chiroptera      | GCF_004126475.1 | Chromosome | 2117.76 | 42.4541 | 141     |
| <i>Pipistrellus pipistrellus</i> | Chiroptera      | GCA_004026625.1 | Scaffold   | 2090.67 | 42.9    | 726104  |
| <i>Pteronotus parnellii</i>      | Chiroptera      | GCA_000465405.1 | Scaffold   | 1960.32 | 40.8    | 177401  |
| <i>Pteropus alecto</i>           | Chiroptera      | GCF_000325575.1 | Scaffold   | 1985.98 | 39.9    | 65598   |
| <i>Pteropus vampyrus</i>         | Chiroptera      | GCF_000151845.1 | Scaffold   | 2198.28 | 40.5    | 36094   |
| <i>Rhinolophus ferrumequinum</i> | Chiroptera      | GCA_004115265.2 | Chromosome | 2075.79 | 40.5699 | 135     |
| <i>Rousettus aegyptiacus</i>     | Chiroptera      | GCF_001466805.2 | Scaffold   | 1910.25 | 40      | 2490    |
| <i>Tadarida brasiliensis</i>     | Chiroptera      | GCA_004025005.1 | Scaffold   | 2709.93 | 42.4    | 1067615 |
| <i>Tonatia saurophila</i>        | Chiroptera      | GCA_004024845.1 | Scaffold   | 2105.89 | 42      | 249810  |
| <i>Anoura caudifer</i>           | Chiroptera      | GCA_004027475.1 | Scaffold   | 2206.59 | 41.7    | 337255  |
| <i>Chaetophractus vellerosus</i> | Cingulata       | GCA_004027955.1 | Scaffold   | 5335.6  | 39.7    | 7677333 |
| <i>Dasyurus novemcinctus</i>     | Cingulata       | GCF_000208655.1 | Scaffold   | 3631.52 | 41.5    | 46559   |
| <i>Tolypeutes matacus</i>        | Cingulata       | GCA_004025125.1 | Scaffold   | 4115.03 | 39.2    | 2925507 |
| <i>Sarcophilus harrisii</i>      | Dasyuromorphia  | GCF_000189315.1 | Scaffold   | 3174.69 | 37      | 35974   |
| <i>Galeopterus variegatus</i>    | Dermoptera      | GCF_000696425.1 | Scaffold   | 3187.66 | 41.2    | 179514  |
| <i>Monodelphis domestica</i>     | Didelphimorphia | GCF_000002295.2 | Chromosome | 3598.44 | 38.1446 | 5223    |
| <i>Notamacropus eugenii</i>      | Diprotodontia   | GCA_000004035.1 | Scaffold   | 3075.18 | 40.4    | 277711  |
| <i>Phascolarctos cinereus</i>    | Diprotodontia   | GCF_002099425.1 | Contig     | 3192.58 | 39.1    | 1907    |
| <i>Vombatus ursinus</i>          | Diprotodontia   | GCF_900497805.2 | Scaffold   | 3486.6  | 38.9    | 15416   |
| <i>Condylura cristata</i>        | Eulipotyphla    | GCF_000260355.1 | Scaffold   | 1769.66 | 41.9    | 2040    |
| <i>Crociodura indochinensis</i>  | Eulipotyphla    | GCA_004027635.1 | Scaffold   | 3082.22 | 39.8    | 2415412 |
| <i>Erinaceus europaeus</i>       | Eulipotyphla    | GCF_000296755.1 | Scaffold   | 2715.72 | 42.4999 | 5803    |
| <i>Scalopus aquaticus</i>        | Eulipotyphla    | GCA_004024925.1 | Scaffold   | 2068.87 | 42      | 640296  |
| <i>Solenodon paradoxus</i>       | Eulipotyphla    | GCA_004363575.1 | Scaffold   | 2109.88 | 40      | 176618  |
| <i>Sorex araneus</i>             | Eulipotyphla    | GCF_000181275.1 | Scaffold   | 2423.16 | 43.4    | 12845   |
| <i>Uropsilus gracilis</i>        | Eulipotyphla    | GCA_004024945.1 | Scaffold   | 2112.71 | 41.1    | 723835  |
| <i>Heterohyrax brucei</i>        | Hyracoidea      | GCA_004026845.1 | Scaffold   | 3618.15 | 40.9    | 967933  |
| <i>Procavia capensis</i>         | Hyracoidea      | GCA_000152225.2 | Scaffold   | 3602.18 | 41.8    | 65694   |
| <i>Lepus americanus</i>          | Lagomorpha      | GCA_004026855.1 | Scaffold   | 3123.27 | 44.1    | 1592829 |
| <i>Ochotona princeps</i>         | Lagomorpha      | GCF_000292845.1 | Scaffold   | 2229.84 | 44      | 10421   |

|                                             |                |                  |            |         |         |         |
|---------------------------------------------|----------------|------------------|------------|---------|---------|---------|
| <i>Oryctolagus cuniculus</i>                | Lagomorpha     | GCF_000003625.3  | Chromosome | 2737.46 | 44.0526 | 3318    |
| <i>Elephantulus edwardii</i>                | Macroscelidea  | GCF_000299155.1  | Scaffold   | 3843.98 | 41.5    | 8768    |
| <i>Ornithorhynchus anatinus</i>             | Monotremata    | GCF_004115215.1  | Chromosome | 1858.55 | 46.1699 | 305     |
| <i>Ceratotherium simum simum</i>            | Perissodactyla | GCF_000283155.1  | Scaffold   | 2464.37 | 41.2    | 3087    |
| <i>Dicerorhinus sumatrensis sumatrensis</i> | Perissodactyla | GCA_002844835.1  | Scaffold   | 2949.86 | 39.2    | 1061589 |
| <i>Diceros bicornis</i>                     | Perissodactyla | GCA_004027315.1  | Scaffold   | 3020.7  | 41.2    | 2022658 |
| <i>Equus asinus</i>                         | Perissodactyla | GCF_001305755.1  | Scaffold   | 2391.05 | 41.4    | 2167    |
| <i>Equus caballus</i>                       | Perissodactyla | GCF_002863925.1  | Chromosome | 2506.97 | 41.5271 | 4701    |
| <i>Equus przewalskii</i>                    | Perissodactyla | GCF_000696695.1  | Scaffold   | 2395.95 | 41.3    | 53097   |
| <i>Tapirus indicus</i>                      | Perissodactyla | GCA_004024905.1  | Scaffold   | 2425.2  | 40.9    | 280135  |
| <i>Tapirus terrestris</i>                   | Perissodactyla | GCA_004025025.1  | Scaffold   | 2571.46 | 41.1    | 803506  |
| <i>Manis javanica</i>                       | Pholidota      | GCF_001685135.1  | Scaffold   | 2547.4  | 41.5    | 80670   |
| <i>Manis pentadactyla</i>                   | Pholidota      | GCA_000738955.1  | Scaffold   | 2204.73 | 41.6    | 92772   |
| <i>Manis tricuspis</i>                      | Pholidota      | GCA_004765945.1  | Scaffold   | 3013.4  | 40.8    | 2116242 |
| <i>Bradypus variegatus</i>                  | Pilosa         | GCA_004027775.1  | Scaffold   | 1502.48 | 42.8    | 1771805 |
| <i>Choloepus didactylus</i>                 | Pilosa         | GCA_004027855.1  | Scaffold   | 3390.66 | 39.8    | 2532333 |
| <i>Choloepus hoffmanni</i>                  | Pilosa         | GCA_000164785.2  | Scaffold   | 3286.01 | 40      | 269084  |
| <i>Myrmecophaga tridactyla</i>              | Pilosa         | GCA_004026745.1  | Scaffold   | 3547.27 | 39.5    | 1621408 |
| <i>Tamandua tetradactyla</i>                | Pilosa         | GCA_004025105.1  | Scaffold   | 3849.37 | 39.5    | 2144204 |
| <i>Cercocebus atys</i>                      | Primates       | GCF_000955945.1  | Scaffold   | 2848.25 | 41.1    | 11433   |
| <i>Cercopithecus neglectus</i>              | Primates       | GCA_004027615.1  | Scaffold   | 3278.86 | 41.2    | 2119200 |
| <i>Chlorocebus sabaeus</i>                  | Primates       | GCF_000409795.2  | Chromosome | 2789.66 | 40.9303 | 2022    |
| <i>Colobus angolensis palliatus</i>         | Primates       | GCF_000951035.1  | Scaffold   | 2970.12 | 41.6    | 13124   |
| <i>Erythrocebus patas</i>                   | Primates       | GCA_004027335.1  | Scaffold   | 3490.49 | 41.2    | 2563960 |
| <i>Gorilla gorilla gorilla</i>              | Primates       | GCF_000151905.2  | Chromosome | 3063.36 | 41.2224 | 40730   |
| <i>Homo sapiens</i>                         | Primates       | GCF_000001405.39 | Chromosome | 3272.09 | 41.48   | 919     |
| <i>Macaca fascicularis</i>                  | Primates       | GCF_000364345.1  | Chromosome | 2946.84 | 41.3398 | 7625    |
| <i>Macaca fuscata fuscata</i>               | Primates       | GCA_003118495.1  | Contig     | 2930.71 | 40.9    | 90905   |
| <i>Macaca mulatta</i>                       | Primates       | GCF_003339765.1  | Chromosome | 2971.33 | 41.1015 | 2979    |
| <i>Macaca nemestrina</i>                    | Primates       | GCF_000956065.1  | Scaffold   | 2948.7  | 41.3    | 9733    |
| <i>Mandrillus leucophaeus</i>               | Primates       | GCF_000951045.1  | Scaffold   | 3061.99 | 41.6    | 12821   |
| <i>Mandrillus sphinx</i>                    | Primates       | GCA_004802615.1  | Scaffold   | 2860.58 | 39.6    | 53550   |
| <i>Nasalis larvatus</i>                     | Primates       | GCA_000772465.1  | Chromosome | 3011.97 | 42.2536 | 319549  |
| <i>Nomascus leucogenys</i>                  | Primates       | GCF_000146795.2  | Chromosome | 2962.06 | 41.3958 | 17524   |
| <i>Pan paniscus</i>                         | Primates       | GCF_000258655.2  | Chromosome | 3286.64 | 42.3185 | 10984   |

|                                        |             |                 |            |         |         |         |
|----------------------------------------|-------------|-----------------|------------|---------|---------|---------|
| <i>Pan troglodytes</i>                 | Primates    | GCF_002880755.1 | Chromosome | 3050.4  | 40.8082 | 4432    |
| <i>Papio anubis</i>                    | Primates    | GCF_000264685.3 | Chromosome | 2959.37 | 41.0402 | 71135   |
| <i>Ptilocolobus tephrosceles</i>       | Primates    | GCF_002776525.2 | Scaffold   | 3038.01 | 40.9    | 47449   |
| <i>Pongo abelii</i>                    | Primates    | GCF_002880775.1 | Chromosome | 3065.05 | 40.8623 | 5300    |
| <i>Pygathrix nemaeus</i>               | Primates    | GCA_004024825.1 | Scaffold   | 3217.15 | 41      | 1431093 |
| <i>Rhinopithecus bieti</i>             | Primates    | GCF_001698545.1 | Scaffold   | 2977.07 | 41.5    | 105032  |
| <i>Rhinopithecus roxellana</i>         | Primates    | GCF_000769185.1 | Scaffold   | 2899.55 | 41      | 135512  |
| <i>Semnopithecus entellus</i>          | Primates    | GCA_004025065.1 | Scaffold   | 3033.04 | 41.3    | 1063749 |
| <i>Theropithecus gelada</i>            | Primates    | GCF_003255815.1 | Chromosome | 2889.63 | 41.1126 | 15308   |
| <i>Alouatta palliata</i>               | Primates    | GCA_004027835.1 | Scaffold   | 3033.62 | 40.8    | 1136565 |
| <i>Aotus nancymae</i>                  | Primates    | GCF_000952055.2 | Scaffold   | 2861.68 | 41.1    | 28922   |
| <i>Ateles geoffroyi</i>                | Primates    | GCA_004024785.1 | Scaffold   | 2897.03 | 40.7    | 869075  |
| <i>Callithrix jacchus</i>              | Primates    | GCF_000004665.1 | Chromosome | 2914.96 | 41.3414 | 16399   |
| <i>Cebus albifrons</i>                 | Primates    | GCA_004027755.1 | Scaffold   | 3058.67 | 41.1    | 1539166 |
| <i>Cebus capucinus imitator</i>        | Primates    | GCF_001604975.1 | Scaffold   | 2717.7  | 41      | 7156    |
| <i>Pithecia pithecia</i>               | Primates    | GCA_004026645.1 | Scaffold   | 2933.56 | 40.6    | 892330  |
| <i>Plecturocebus donacophilus</i>      | Primates    | GCA_004027715.1 | Scaffold   | 2959.76 | 41      | 1033983 |
| <i>Saguinus imperator</i>              | Primates    | GCA_004024885.1 | Scaffold   | 3493.72 | 40.8    | 1666189 |
| <i>Saimiri boliviensis boliviensis</i> | Primates    | GCF_000235385.1 | Scaffold   | 2608.59 | 41.1    | 2686    |
| <i>Cheirogaleus medius</i>             | Primates    | GCA_004024725.1 | Scaffold   | 2393.09 | 40.5    | 547751  |
| <i>Daubentonia madagascariensis</i>    | Primates    | GCA_004027145.1 | Scaffold   | 2498.42 | 40      | 342451  |
| <i>Eulemur flavifrons</i>              | Primates    | GCA_001262665.1 | Scaffold   | 2115.57 | 40.5    | 38367   |
| <i>Eulemur fulvus</i>                  | Primates    | GCA_004027275.1 | Scaffold   | 2748.89 | 41.4    | 1693913 |
| <i>Eulemur macaco</i>                  | Primates    | GCA_001262655.1 | Scaffold   | 2119.88 | 38.3    | 26772   |
| <i>Indri indri</i>                     | Primates    | GCA_004363605.1 | Scaffold   | 2701.85 | 41.3    | 1243540 |
| <i>Lemur catta</i>                     | Primates    | GCA_004024665.1 | Scaffold   | 2298.45 | 41.1    | 575427  |
| <i>Microcebus murinus</i>              | Primates    | GCF_000165445.2 | Chromosome | 2487.41 | 41.3423 | 7678    |
| <i>Mirza coquereli</i>                 | Primates    | GCA_004024645.1 | Scaffold   | 2340.87 | 40.8    | 440879  |
| <i>Nycticebus coucang</i>              | Primates    | GCA_004027815.1 | Scaffold   | 3294.56 | 40.7    | 1937143 |
| <i>Otolemur garnettii</i>              | Primates    | GCF_000181295.1 | Scaffold   | 2519.72 | 41.5    | 7793    |
| <i>Prolemur simus</i>                  | Primates    | GCA_003258685.1 | Scaffold   | 2411.59 | 37.8    | 128596  |
| <i>Propithecus coquereli</i>           | Primates    | GCF_000956105.1 | Scaffold   | 2798.15 | 43.2    | 22539   |
| <i>Carlito syrichta</i>                | Primates    | GCF_000164805.1 | Scaffold   | 3453.86 | 41      | 337189  |
| <i>Loxodonta africana</i>              | Proboscidea | GCF_000001905.1 | Scaffold   | 3196.74 | 40.9    | 2352    |
| <i>Acomys cahirinus</i>                | Rodentia    | GCA_004027535.1 | Scaffold   | 2306.07 | 42.7    | 371342  |

|                                   |          |                 |          |         |      |         |
|-----------------------------------|----------|-----------------|----------|---------|------|---------|
| <i>Allactaga bullata</i>          | Rodentia | GCA_004027895.1 | Scaffold | 3093.58 | 41.9 | 1284382 |
| <i>Apodemus speciosus</i>         | Rodentia | GCA_002335545.1 | Scaffold | 3494.29 | 24.2 | 336124  |
| <i>Apodemus sylvaticus</i>        | Rodentia | GCA_001305905.1 | Scaffold | 3758.14 | 22.6 | 559629  |
| <i>Capromys pilorides</i>         | Rodentia | GCA_004027915.1 | Scaffold | 3023.85 | 42   | 2352358 |
| <i>Castor canadensis</i>          | Rodentia | GCF_001984765.1 | Scaffold | 2518.31 | 39.7 | 21157   |
| <i>Cavia aperea</i>               | Rodentia | GCA_000688575.1 | Scaffold | 2716.4  | 42.2 | 3131    |
| <i>Cavia porcellus</i>            | Rodentia | GCF_000151735.1 | Scaffold | 2723.22 | 40.1 | 3144    |
| <i>Cavia tschudii</i>             | Rodentia | GCA_004027695.1 | Scaffold | 3077.35 | 40.1 | 1368179 |
| <i>Chinchilla lanigera</i>        | Rodentia | GCF_000276665.1 | Scaffold | 2390.87 | 41.4 | 2839    |
| <i>Cricetomys gambianus</i>       | Rodentia | GCA_004027575.1 | Scaffold | 2397.72 | 42.1 | 1102952 |
| <i>Cricetulus griseus</i>         | Rodentia | GCF_000223135.1 | Scaffold | 2399.79 | 41.6 | 109152  |
| <i>Ctenodactylus gundi</i>        | Rodentia | GCA_004027205.1 | Scaffold | 2322.47 | 42.7 | 860073  |
| <i>Ctenomys sociabilis</i>        | Rodentia | GCA_004027165.1 | Scaffold | 2834.81 | 40.7 | 807571  |
| <i>Cuniculus paca</i>             | Rodentia | GCA_004365215.1 | Scaffold | 3399.58 | 40.8 | 3768450 |
| <i>Dasyprocta punctata</i>        | Rodentia | GCA_004363535.1 | Scaffold | 3012.1  | 40.8 | 986664  |
| <i>Dinomys branickii</i>          | Rodentia | GCA_004027595.1 | Scaffold | 2688.56 | 41.8 | 1158438 |
| <i>Dipodomys ordii</i>            | Rodentia | GCF_000151885.1 | Scaffold | 2236.37 | 42.6 | 65193   |
| <i>Dipodomys stephensi</i>        | Rodentia | GCA_004024685.1 | Scaffold | 2346.42 | 41.9 | 1269643 |
| <i>Dolichotis patagonum</i>       | Rodentia | GCA_004027295.1 | Scaffold | 3289.61 | 39.8 | 1905764 |
| <i>Ellobius lutescens</i>         | Rodentia | GCA_001685075.1 | Scaffold | 2353.19 | 39.9 | 58423   |
| <i>Ellobius talpinus</i>          | Rodentia | GCA_001685095.1 | Scaffold | 2265.97 | 41.3 | 350460  |
| <i>Fukomys damarensis</i>         | Rodentia | GCF_000743615.1 | Scaffold | 2333.89 | 40.5 | 74730   |
| <i>Glis glis</i>                  | Rodentia | GCA_004027185.1 | Scaffold | 2462.09 | 42.3 | 433430  |
| <i>Grammomys surdaster</i>        | Rodentia | GCF_004785775.1 | Scaffold | 2412.66 | 41.3 | 23656   |
| <i>Graphiurus murinus</i>         | Rodentia | GCA_004027655.1 | Scaffold | 2815.01 | 41.5 | 1267939 |
| <i>Heterocephalus glaber</i>      | Rodentia | GCF_000247695.1 | Scaffold | 2618.2  | 41.2 | 4229    |
| <i>Hydrochoerus hydrochaeris</i>  | Rodentia | GCA_004027455.1 | Scaffold | 2734.59 | 39.8 | 655342  |
| <i>Hystrix cristata</i>           | Rodentia | GCA_004026905.1 | Scaffold | 2470.92 | 41.5 | 1136598 |
| <i>Ictidomys tridecemlineatus</i> | Rodentia | GCF_000236235.1 | Scaffold | 2478.39 | 40.5 | 12483   |
| <i>Jaculus jaculus</i>            | Rodentia | GCF_000280705.1 | Scaffold | 2835.25 | 42.7 | 10898   |
| <i>Marmota flaviventris</i>       | Rodentia | GCF_003676075.1 | Scaffold | 2582.14 | 40.1 | 32915   |
| <i>Marmota himalayana</i>         | Rodentia | GCA_005280165.1 | Scaffold | 2471.7  | 38   | 4363    |
| <i>Marmota marmota marmota</i>    | Rodentia | GCF_001458135.1 | Scaffold | 2510.59 | 40.2 | 14543   |
| <i>Meriones unguiculatus</i>      | Rodentia | GCF_002204375.1 | Scaffold | 2523.12 | 42.5 | 68793   |
| <i>Mesocricetus auratus</i>       | Rodentia | GCF_000349665.1 | Scaffold | 2504.93 | 43.2 | 21484   |

|                                           |            |                  |            |         |         |         |
|-------------------------------------------|------------|------------------|------------|---------|---------|---------|
| <i>Microtus agrestis</i>                  | Rodentia   | GCA_001305995.1  | Scaffold   | 3124.14 | 26.4    | 230202  |
| <i>Microtus ochrogaster</i>               | Rodentia   | GCF_000317375.1  | Chromosome | 2287.34 | 42.8312 | 6450    |
| <i>Mus caroli</i>                         | Rodentia   | GCF_900094665.1  | Chromosome | 2553.13 | 42.6193 | 3163    |
| <i>Mus musculus</i>                       | Rodentia   | GCF_000001635.26 | Chromosome | 2818.97 | 41.95   | 336     |
| <i>Mus pahari</i>                         | Rodentia   | GCF_900095145.1  | Chromosome | 2475.01 | 42.6694 | 2581    |
| <i>Mus spicilegus</i>                     | Rodentia   | GCA_003336285.1  | Scaffold   | 2496.08 | -       | 37536   |
| <i>Mus spretus</i>                        | Rodentia   | GCA_001624865.1  | Chromosome | 2625.59 | 42.3292 | 5404    |
| <i>Muscardinus avellanarius</i>           | Rodentia   | GCA_004027005.1  | Scaffold   | 2527.15 | 41.6    | 466805  |
| <i>Myocastor coypus</i>                   | Rodentia   | GCA_004027025.1  | Scaffold   | 2903.18 | 41.7    | 1669667 |
| <i>Myodes glareolus</i>                   | Rodentia   | GCA_004368595.1  | Scaffold   | 2396.23 | 39.8    | 50926   |
| <i>Nannospalax galili</i>                 | Rodentia   | GCF_000622305.1  | Scaffold   | 3061.42 | 41.6    | 154976  |
| <i>Neotoma lepida</i>                     | Rodentia   | GCA_001675575.1  | Scaffold   | 2353.86 | 36.2    | 119373  |
| <i>Octodon degus</i>                      | Rodentia   | GCF_000260255.1  | Scaffold   | 2995.89 | 42.5    | 7135    |
| <i>Octomys mimax</i>                      | Rodentia   | GCA_002564305.1  | Scaffold   | 2591.29 | 41.2    | 1257804 |
| <i>Ondatra zibethicus</i>                 | Rodentia   | GCA_004026605.1  | Scaffold   | 2562.75 | 41.6    | 565356  |
| <i>Onychomys torridus</i>                 | Rodentia   | GCA_004026725.1  | Scaffold   | 3202.22 | 41.6    | 2261735 |
| <i>Perognathus longimembris pacificus</i> | Rodentia   | GCA_004363475.1  | Scaffold   | 2601.7  | 41.8    | 2409818 |
| <i>Peromyscus leucopus</i>                | Rodentia   | GCF_004664715.1  | Scaffold   | 2474.07 | 42.2    | 1763    |
| <i>Peromyscus maniculatus bairdii</i>     | Rodentia   | GCF_000500345.1  | Scaffold   | 2630.54 | 42.7    | 30921   |
| <i>Peromyscus polionotus subgriseus</i>   | Rodentia   | GCA_003704135.2  | Chromosome | 2645.11 | 42.9297 | 5292    |
| <i>Petromus typicus</i>                   | Rodentia   | GCA_004026965.1  | Scaffold   | 2389.37 | 41.8    | 910679  |
| <i>Phodopus sungorus</i>                  | Rodentia   | GCA_001707965.1  | Contig     | 2003.23 | 41.3    | 1462128 |
| <i>Psammomys obesus</i>                   | Rodentia   | GCA_002215935.1  | Contig     | 2311.47 | 42      | 96427   |
| <i>Rattus norvegicus</i>                  | Rodentia   | GCF_000001895.5  | Chromosome | 2870.18 | 42.3282 | 1395    |
| <i>Rhizomys pruinosus</i>                 | Rodentia   | GCA_004026225.1  | Scaffold   | 3937.27 | 41.7    | 4150536 |
| <i>Sigmodon hispidus</i>                  | Rodentia   | GCA_004025045.1  | Scaffold   | 2730.6  | 39.8    | 883546  |
| <i>Spermophilus dauricus</i>              | Rodentia   | GCA_002406435.1  | Scaffold   | 3106.27 | 40.2    | 360804  |
| <i>Thryonomys swinderianus</i>            | Rodentia   | GCA_004025085.1  | Scaffold   | 2662.15 | 42.8    | 1889641 |
| <i>Tympanoctomys barrerae</i>             | Rodentia   | GCA_002564285.1  | Scaffold   | 2651.63 | 41.2    | 1558800 |
| <i>Urocitellus parryii</i>                | Rodentia   | GCF_003426925.1  | Scaffold   | 2520.51 | 41      | 15884   |
| <i>Xerus inauris</i>                      | Rodentia   | GCA_004024805.1  | Scaffold   | 2601.42 | 40      | 577370  |
| <i>Zapus hudsonius</i>                    | Rodentia   | GCA_004024765.1  | Scaffold   | 2611.19 | 42.3    | 1158100 |
| <i>Aplodontia rufa</i>                    | Rodentia   | GCA_004027875.1  | Scaffold   | 3005.54 | 40.6    | 1279526 |
| <i>Tupaia belangeri</i>                   | Scandentia | GCA_000181375.1  | Contig     | 2137.23 | 41.4    | 841006  |
| <i>Tupaia chinensis</i>                   | Scandentia | GCF_000334495.1  | Scaffold   | 2846.58 | 42      | 50750   |



|                                       |               |                 |          |         |         |         |
|---------------------------------------|---------------|-----------------|----------|---------|---------|---------|
| <i>Tupaia tana</i>                    | Scandentia    | GCA_004365275.1 | Scaffold | 3648.91 | 42      | 3883620 |
| <i>Trichechus manatus latirostris</i> | Sirenia       | GCF_000243295.1 | Scaffold | 3103.81 | 41.6    | 6323    |
| <i>Orycteropus afer afer</i>          | Tubulidentata | GCF_000298275.1 | Scaffold | 4444.08 | 42.0995 | 22509   |

---

\*indicates the presence of endogenous lokiretroviruses in corresponding species.

**Table S3. Information of queries used in this study**

| <b>Name</b>                           | <b>Abbreviation</b> | <b>Accession No.</b> |
|---------------------------------------|---------------------|----------------------|
| Friend murine leukemia virus          | MLV                 | NP_040333.1          |
| Walleye dermal sarcoma virus          | WDSV                | NP_045937.2          |
| Mouse mammary tumor virus             | MMTV                | NP_056880.1          |
| Human endogenous retroviruses type L  | HERV-L              | Ref. 1               |
| Eastern chimpanzee simian foamy virus | SFVcpz              | YP_009508551.1       |

## References

1. L. Vargiu, P. Rodriguez-Tomé, G. O. Sperber, M. Cadeddu, N. Grandi, V. Blikstad, E. Tramontano, J. Blomberg, Classification and characterization of human endogenous retroviruses; mosaic forms are common. *Retrovirology* **13**, 7 (2016).

**Table S4. Information of sequences used for phylogenetic analyses**

| <b>Type/Group</b> | <b>Name</b>                               | <b>Accession No.</b> |
|-------------------|-------------------------------------------|----------------------|
| Bacterium         | <i>Mycolicibacterium gilvum</i> RNase H   | WP_011893771.1       |
| Bacterium         | Mycobacteriaceae RNase H                  | WP_011560725.1       |
| Bacterium         | <i>Micromonospora aurantiaca</i> RNase H  | WP_013287786.1       |
| Bacterium         | <i>Buchnera aphidicola</i> RNase H        | WP_011091358.1       |
| Bacterium         | <i>Shewanella denitrificans</i> RNase H   | WP_011496458.1       |
| Bacterium         | <i>Helicobacter pylori</i> RNase H        | WP_001155465.1       |
| Belpaoviridae     | Kobel                                     | Gypsy Database 2.0   |
| Belpaoviridae     | Tamy                                      | Gypsy Database 2.0   |
| Belpaoviridae     | Zebel                                     | Gypsy Database 2.0   |
| Belpaoviridae     | Bel                                       | Gypsy Database 2.0   |
| Belpaoviridae     | Purbel                                    | Gypsy Database 2.0   |
| Belpaoviridae     | Cer10-1                                   | Gypsy Database 2.0   |
| Belpaoviridae     | ApBIN1h                                   | Gypsy Database 2.0   |
| Belpaoviridae     | ApBIN1j                                   | Gypsy Database 2.0   |
| Caulimovirus      | CaMV                                      | Gypsy Database 2.0   |
| Caulimovirus      | SbCMV                                     | Gypsy Database 2.0   |
| Caulimovirus      | ComYMV                                    | Gypsy Database 2.0   |
| Caulimovirus      | RTBV                                      | Gypsy Database 2.0   |
| Caulimovirus      | CSVMV                                     | Gypsy Database 2.0   |
| Caulimovirus      | PVCV                                      | Gypsy Database 2.0   |
| Cgin1             | HsCGIN1                                   | Gypsy Database 2.0   |
| Cgin1             | MmCGIN1                                   | Gypsy Database 2.0   |
| DIRS              | <i>Caenorhabditis briggsae</i> AF16 DIRS  | CAP25970.2           |
| DIRS              | <i>Panagrellus redivivus</i> DIRS         | CAA43185.1           |
| Eukaryote         | <i>Arabidopsis thaliana</i> RNase H       | AAF24611.1           |
| Eukaryote         | <i>Oryza sativa</i> RNase H               | AAK54296.1           |
| Eukaryote         | <i>Ostreococcus tauri</i> RNase H         | XP_003080907.1       |
| Eukaryote         | <i>Ignicoccus hospitalis</i> RNase H      | WP_012123294.1       |
| Eukaryote         | <i>Vulcanisaeta moutnovskia</i> RNase H   | WP_013604220.1       |
| Eukaryote         | <i>Ferroglobus placidus</i> RNase H       | WP_012965086.1       |
| Eukaryote         | <i>Pisum sativum</i> RNase H              | AAQ82037             |
| Eukaryote         | <i>Haloarcula marismortui</i> RNase H     | AAV48010.1           |
| Eukaryote         | <i>Natrinema pellirubrum</i> RNase H      | WP_006182114.1       |
| Eukaryote         | <i>Halorhabdus utahensis</i> RNase H      | WP_015788958.1       |
| Eukaryote         | <i>Halorubrum lacusprofundi</i> RNase H   | WP_012659552.1       |
| Eukaryote         | <i>Candida orthopsilosis</i> RNase H      | XP_003871485.1       |
| Eukaryote         | <i>Komagataella phaffii</i> GS115 RNase H | XP_002490024.1       |
| Eukaryote         | <i>Trypanosoma brucei</i> RNase H         | AAC47537.1           |
| Eukaryote         | <i>Homo sapiens</i> RNase H               | AAV38476.1           |
| Eukaryote         | <i>Caenorhabditis elegans</i> RNase H     | NP_001040786.1       |
| Gin1              | HsGIN1                                    | Gypsy Database 2.0   |
| Gin2              | DrGIN2-2                                  | Gypsy Database 2.0   |
| Gina              | HmGINA1                                   | Gypsy Database 2.0   |
| Ginger1           | HmGINGER1                                 | Gypsy Database 2.0   |
| Ginger2           | HmGINGER2-1                               | Gypsy Database 2.0   |
| Ginger2           | FcSCAND3                                  | Gypsy Database 2.0   |
| Ginger2           | HsSCAND3                                  | Gypsy Database 2.0   |
| Ginger2           | MeSCAND3                                  | Gypsy Database 2.0   |
| Ginger2           | HsKRBA2                                   | Gypsy Database 2.0   |
| Ginger2           | BtKRBA2                                   | Gypsy Database 2.0   |
| Ginger2           | LaKRBA2                                   | Gypsy Database 2.0   |
| Ginger2           | ApGINGER2a                                | Gypsy Database 2.0   |

|                   |            |                    |
|-------------------|------------|--------------------|
| Ginger2           | BmGINGER2a | Gypsy Database 2.0 |
| Ginny             | HmGINNY1   | Gypsy Database 2.0 |
| Gino              | HmGINO1    | Gypsy Database 2.0 |
| IS3/IS481         | ISSc       | Gypsy Database 2.0 |
| IS3/IS482         | ISAf       | Gypsy Database 2.0 |
| IS3/IS483         | ISLa       | Gypsy Database 2.0 |
| IS3/IS484         | ISTv1      | Gypsy Database 2.0 |
| IS3/IS485         | ISEc       | Gypsy Database 2.0 |
| Maverick/Polinton | DpCIN1     | Gypsy Database 2.0 |
| Maverick/Polinton | DrCIN1     | Gypsy Database 2.0 |
| Maverick/Polinton | SmCIN1     | Gypsy Database 2.0 |
| Metaviridae       | Maggy      | Gypsy Database 2.0 |
| Metaviridae       | Pyggy      | Gypsy Database 2.0 |
| Metaviridae       | Skippy     | Gypsy Database 2.0 |
| Metaviridae       | TF1        | Gypsy Database 2.0 |
| Metaviridae       | Amn-san    | Gypsy Database 2.0 |
| Metaviridae       | Sushi-ichi | Gypsy Database 2.0 |
| Metaviridae       | De1        | Gypsy Database 2.0 |
| Metaviridae       | Galadriel  | Gypsy Database 2.0 |
| Metaviridae       | CRM        | Gypsy Database 2.0 |
| Metaviridae       | Reina      | Gypsy Database 2.0 |
| Metaviridae       | Mdg3       | Gypsy Database 2.0 |
| Metaviridae       | Kabuki     | Gypsy Database 2.0 |
| Metaviridae       | RetroSor1  | Gypsy Database 2.0 |
| Metaviridae       | Tat4-1     | Gypsy Database 2.0 |
| Metaviridae       | Athila4-1  | Gypsy Database 2.0 |
| Metaviridae       | Diaspora   | Gypsy Database 2.0 |
| Metaviridae       | Cer4       | Gypsy Database 2.0 |
| Metaviridae       | SPM        | Gypsy Database 2.0 |
| Metaviridae       | Mag        | Gypsy Database 2.0 |
| Metaviridae       | Tor1       | Gypsy Database 2.0 |
| Metaviridae       | Tor2       | Gypsy Database 2.0 |
| Metaviridae       | SURL       | Gypsy Database 2.0 |
| Metaviridae       | Cer3       | Gypsy Database 2.0 |
| Metaviridae       | Gmr1       | Gypsy Database 2.0 |
| Metaviridae       | Woot       | Gypsy Database 2.0 |
| Metaviridae       | Mdg1       | Gypsy Database 2.0 |
| Metaviridae       | Tor4a      | Gypsy Database 2.0 |
| Metaviridae       | Cigr-1     | Gypsy Database 2.0 |
| Metaviridae       | Tom        | Gypsy Database 2.0 |
| Metaviridae       | Zam        | Gypsy Database 2.0 |
| Metaviridae       | Gypsy      | Gypsy Database 2.0 |
| Metaviridae       | ApGIN7a    | Gypsy Database 2.0 |
| Metaviridae       | ApGIN4c    | Gypsy Database 2.0 |
| Metaviridae       | ApGIN5c    | Gypsy Database 2.0 |
| Metaviridae       | ApGIN3c    | Gypsy Database 2.0 |
| Non-LTR           | TRAS1      | BAA07467.1         |
| Non-LTR           | CATS       | BAE44464.1         |
| Non-LTR           | You        | CAC16871.1         |
| Non-LTR           | I          | AAA70222.2         |
| Non-LTR           | Lian-Aa1   | AAB65093.1         |
| Non-LTR           | CgT1       | AAA85636.1         |
| Non-LTR           | MGR583     | AAB71689.1         |
| Non-LTR           | Mars1      | CAA67543.1         |
| Pseudoviridae     | 1731       | Gypsy Database 2.0 |
| Pseudoviridae     | pCretro6   | Gypsy Database 2.0 |

|               |            |                    |
|---------------|------------|--------------------|
| Pseudoviridae | SIRE1-4    | Gypsy Database 2.0 |
| Pseudoviridae | Vitico1-1  | Gypsy Database 2.0 |
| Pseudoviridae | Hydra1-2   | Gypsy Database 2.0 |
| Pseudoviridae | Copia      | Gypsy Database 2.0 |
| Pseudoviridae | Tnt-1      | Gypsy Database 2.0 |
| Pseudoviridae | Koala      | Gypsy Database 2.0 |
| Pseudoviridae | Ty1B       | Gypsy Database 2.0 |
| Pseudoviridae | Ty4        | Gypsy Database 2.0 |
| Pseudoviridae | CoDi6.3    | Gypsy Database 2.0 |
| Pseudoviridae | Zeco1      | Gypsy Database 2.0 |
| Pseudoviridae | CoDi6.7    | Gypsy Database 2.0 |
| Pseudoviridae | CoDi5.6    | Gypsy Database 2.0 |
| Retrovirus    | SRV-1      | M11841.1           |
| Retrovirus    | JSRV       | NC_001494.1        |
| Retrovirus    | MMTV       | NC_001503.1        |
| Retrovirus    | LDV        | U09568.1           |
| Retrovirus    | RSV        | NC_001407.1        |
| Retrovirus    | HIV-1      | NC_001802.1        |
| Retrovirus    | FIV        | NC_001482.1        |
| Retrovirus    | EIAV       | NC_001450.1        |
| Retrovirus    | HTLV-2     | NC_001488.1        |
| Retrovirus    | BLV        | NC_001414.1        |
| Retrovirus    | MuLV       | NC_001362.1        |
| Retrovirus    | FLV        | NC_001940.1        |
| Retrovirus    | KoRV       | AF151794.2         |
| Retrovirus    | REV        | NC_006934.1        |
| Retrovirus    | WDSV       | NC_001867.1        |
| Retrovirus    | Xen-1      | AJ506107.1         |
| Retrovirus    | MuERV-L    | Y12713.1           |
| Retrovirus    | HERV-L     | Ref. 1             |
| Retrovirus    | SnRV       | NC_001724.1        |
| Retrovirus    | BFV        | NC_001831.1        |
| Retrovirus    | EFV        | NC_002201.1        |
| Retrovirus    | FFV        | NC_039242.1        |
| Retrovirus    | SFV        | EU010385.1         |
| Retrovirus    | CoEFV      | Ref. 2             |
| Retrovirus    | AciFLERV   | Ref. 3             |
| Retrovirus    | AliFLERV   | Ref. 3             |
| Retrovirus    | NviFLERV-1 | Ref. 3             |
| Retrovirus    | HreFLERV   | Ref. 3             |
| Retrovirus    | CmiFLERV   | Ref. 3             |
| Retrovirus    | CmiFLERV   | Ref. 3             |
| Retrovirus    | XtrFLERV   | Ref. 3             |
| Retrovirus    | ZFERV-2    | CAAK05053864.1     |

---

## References

1. Vargiu L, Rodriguez-Tomé P, Sperber GO, Cadeddu M, Grandi N, Blikstad V, Tramontano E, Blomberg J. 2016. Classification and characterization of human endogenous retroviruses; mosaic forms are common. *Retrovirology* **13**:7.
2. Han GZ, Worobey M. 2012. An endogenous foamy-like viral element in the coelacanth genome. *PLoS Pathog.* **8**:e1002790.
3. Aiewsakun P, Katzourakis A. 2017. Marine origin of retroviruses in the early Palaeozoic Era. *Nat Commun.* **8**:13954.

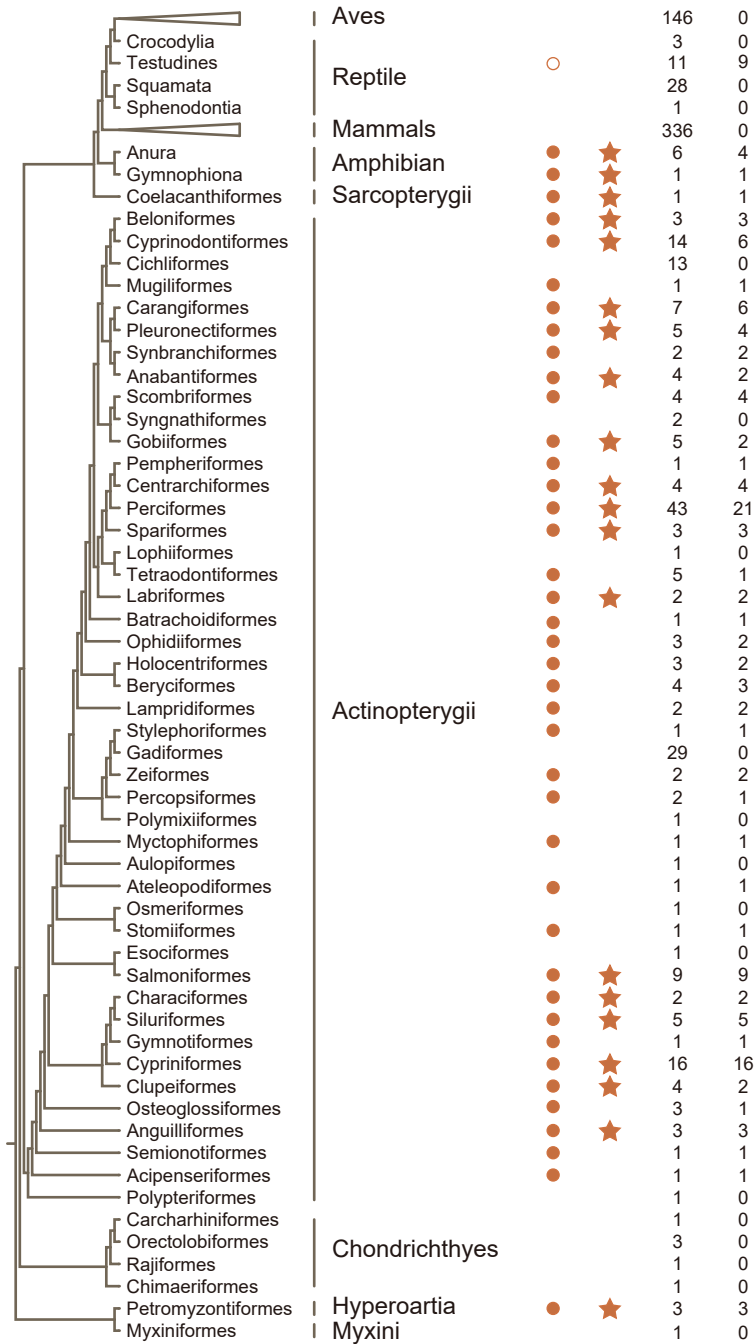

**Fig. S1. Distribution of endogenous lokiretrovirus elements.** Filled orange circle indicates the presence of endogenous lokiretrovirus elements in the corresponding order. Empty orange circle indicates endogenous lokiretroviruses in Testudines were highly degraded. Filled orange star indicates that at least one lokiretrovirus consensus sequence has been reconstructed in the corresponding order. The first column of numbers represents the number of genomes used to screen lokiretrovirus. The second column of numbers represent the number of genomes where lokiretroviruses were identified.

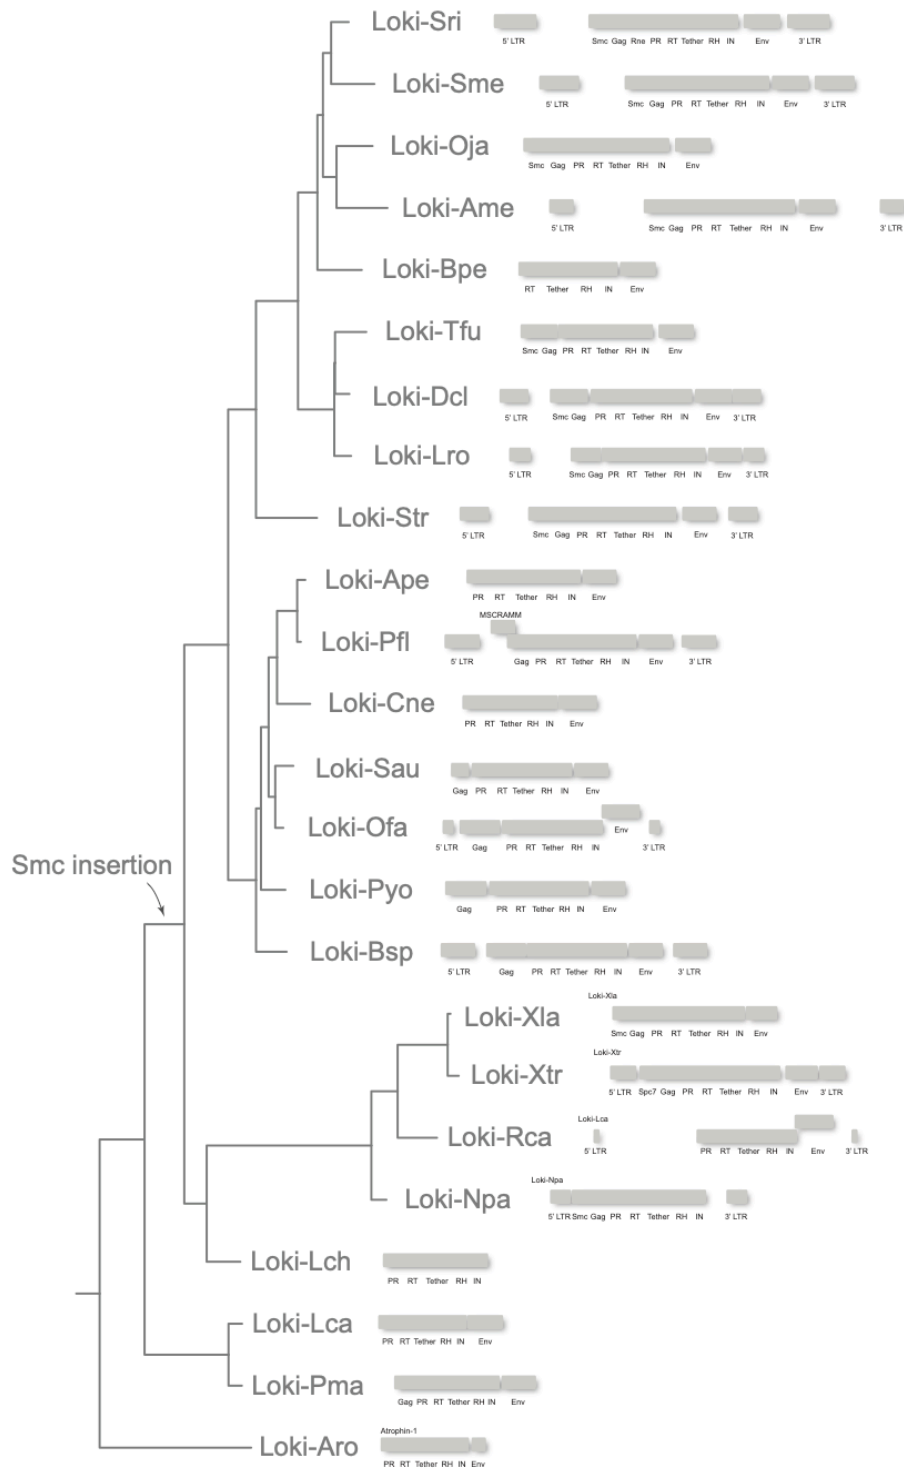

**Fig. S2. Genome structures of 24 lokiretrovirus consensus sequences.**



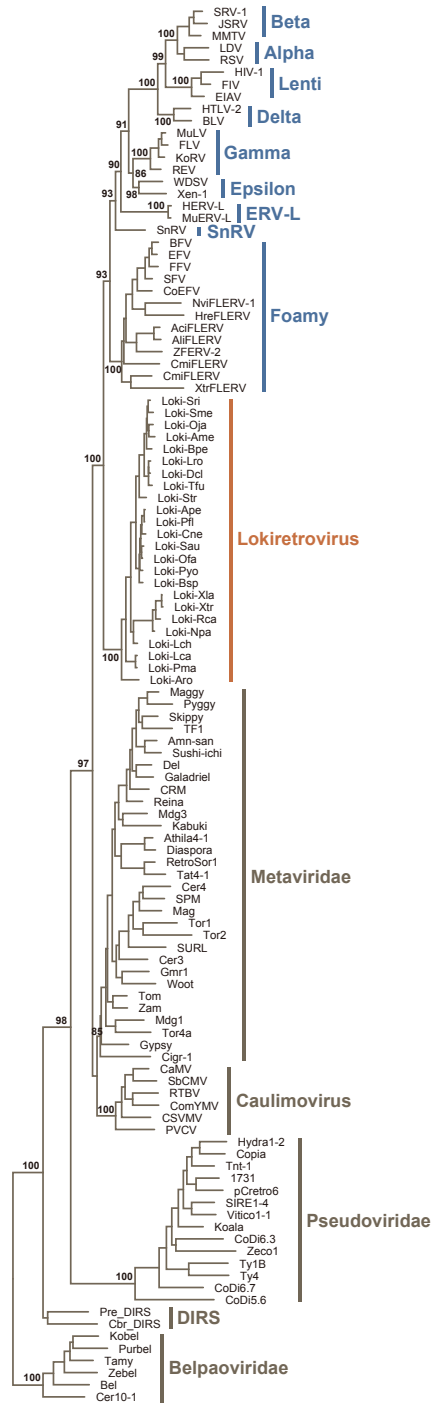

0.7

**Fig. S3. Phylogenetic relationship of lokiretroviruses, retroviruses, DIRS, and other orterviruses.** The supports for selected nodes were evaluated using ultrafast bootstrap approximation method with 1,000 replicates.

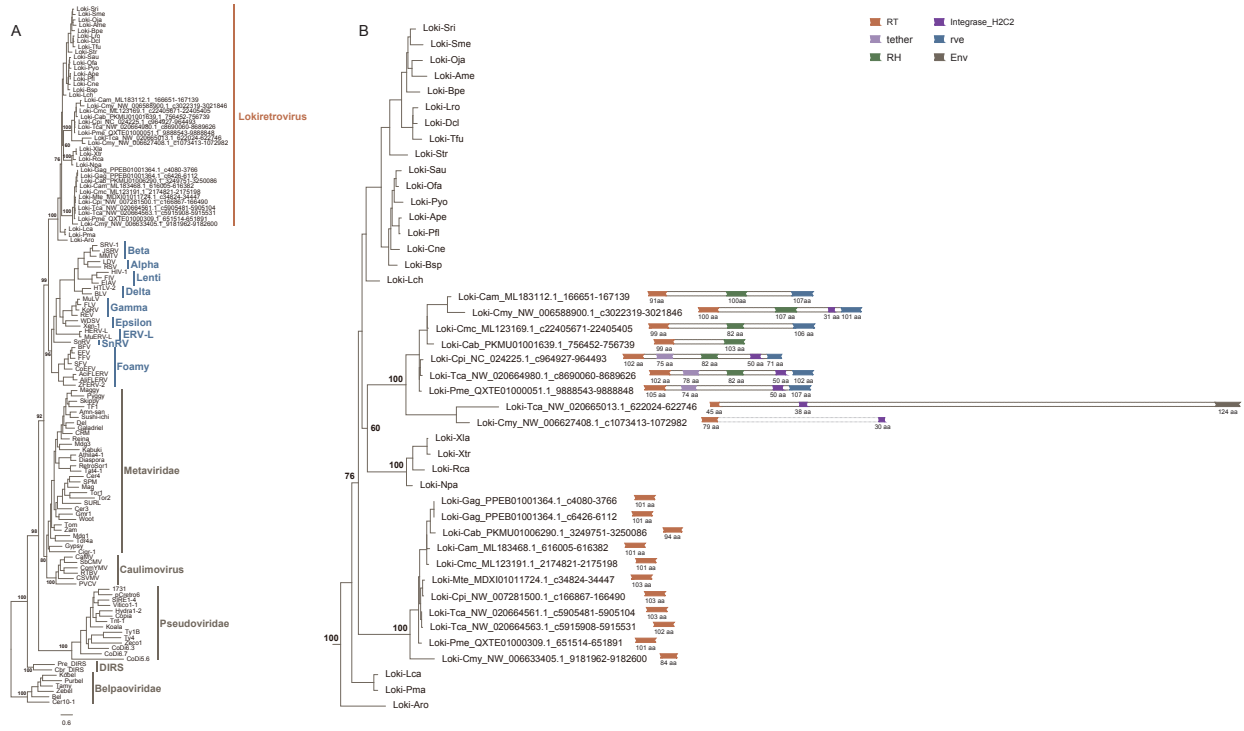

**Fig. S4. Lokiretroviruses in reptiles. (A)** Phylogenetic relationship among reptile lokiretroviruses and other reverse-transcribing viruses. **(B)** The length of domains within reptile lokiretroviruses. All the domains are very short in length, indicating reptile lokiretroviruses are highly degraded.

## Dataset S1. Reconstructed consensus sequences of lokiretroviruses

>Loki-Bsp consensus sequence

TCAGTGAAGTGTTGGGGGACCTCATATGTATAATCTGTTATTAACAGAATTATTATT  
AAGGTCCCACATGCTCAGACAAAGGAAATACTGCGGCCTGCATGTAAAGTCCTCAT  
CCTGATAGTAGTGAATGAGAACAAAGAGATTTCAAATCTCGGCGCCAAAACCAGGC  
GCCAGGCTGGGGAACCACACCTGGCTCCCCGCTGTGAAGGCCGAAACCCCGCTGAC  
ACAAGCGACAAACGGAGGAGAACTTGGACGTCAGCCATCCTGATTGGACCAAACA  
ATAGGATGGGCGTGACCAAAAACACGGTTATAAAAGTCGCCGTGACCCAAGACTCG  
TCCCTTGTCTCTTCGATCACCCGTTACCCCTTGTTCTCCCCCTTGTTCTTTCGATCT  
CCCGTTTCCCCTTCCCTCTTTCGACCCTCTCGCTGCCCCACCTGGAGCTTCCCTCGGC  
ACCAGCACGCCTGAAGCCTCCACCCGACGCCAGCAGCTGAACCAACGGAGACGTCGT  
CACAGAGAACGGGCCTGATCACCCATCTACTTCCAGCCATACGGCAGGAAACCGCC  
AGCTTAACCGCCTCACTCGCCGCCGATCAGCTGATCACGACGCGATCACCGCGACG  
CACACCTGGACCGGACCGGACCGCAACAGAGCAAGCACGCACGCACGCACGCACG  
CACGCAACGCCGGAGCTTCTCACCAGGATTGAGCAGTAAGGCAGAGGCATTCTTAA  
GTCTGAGCAGAGTAGAACTCTTAGGGTATCAGTAATTGTTTTATTGTTGTGTTTTCTT  
TTCCTGCACACACGATCTGACCGCTGTGTATTTCCGCGATCACGTGACTGTAACGCT  
GTTACAGATCTACGTGAATCTAAGAGGTGCACATTGAAGTGTTGTAACCTGTGATT  
CGCTAGCTTAAGTGCTTTATTGTGTTACTGTGTAGTGCTCTGTTTCTGCTGCGACCAC  
GCCAAGCGCACGTTTCAACCACTGCACGCTTCCGCGATCACGTGACTATATCGCAGA  
ATATAGCCCCACGTGTTTGTGTGACCACGAGCCTTATCCACGCTAGTCCCCTTAC  
ACTCCTTTACACGCTTCTTTCCCTGTGAGCGCCAGACACGCGCGCTCCATTCAAAGG  
GCTCACCGGCACACGCGCGCAGCTGTGCCACCTACCACGCCCTAAAGGGGGGCG  
CTCTCCTCCTCCTCCTTCTCTCTTCTCTCTCTCTCTCTCACCCTCACACACATATA  
CACACACACACACACACACACACACACACCCCTCTTATCTCAGGTAACGCGCATAAC  
ATACAGAACGCTAGACGAACACACCATATAATTAAGTTGTGATTTGCTGAGTTATTC  
AAGATAGTGTTGACACTAGAGTTAATATTAAGTGTTAATAAAGCGTTCATAATTTA  
ACTAGTCGTTGTTTGTGATTATTTGTATATGGTTTTGCAGCACTAGTGAATTGAGTCG  
GCTATGGTACGGAATTCACCCTTCAACTAACTTAAATACAAATGAGACTGTATTGGC  
TATCCCAAATCGGTTATTGGTCCCTGGAAACAGGGTGGTGCCCCGTAAATTAAGTAA  
TTATTAATTC AATTAATAATTATTAATCAATAATAGTAAGTGTTCACTTGCCAAAC  
TATAGACATTTGTCATATAGTTATATATATTTAAGCTAATAACCAAGATTTGTGAATC  
TAAATTATAAACATAATTGGTATCTCCACTCAGGAGCTATAAATCCAATTATTATAA  
TTTGTGCTCCTCGCATATCCCCAACATAATTGGTGCCCCGTGTGAGGCCGACAAAGA  
TTATTCACCGTGCTGTAAACCTGTACAAATAATCTACTGGTGGATGCAAGAATCCAC  
AACTCTGTGTGTAGAGACCAGGTTGCCTATTGGTAAAGCTAGTCGCCGAAAGGAACT  
TATTGAGTTTGG AAGCTGTGTTTACCTAGTGTTGATGTGCTAAGTGTGGGTGTTGCA  
TAAGTTACTGAAGCACCAGCATCACTAGCATTGCTCTGCTACCATCTTAGCTACCAG  
CATTAGCCAACAGCTAATATTA ACTTAGATGCCAGCGTAGCATTAGCAACAGTTGCT  
ATTAGCTTAGCAGCCAGCTTAAGCGGTAGCCTAGCGATAAGCTACAGTGGGTGAGC  
AGTAGTTGTCACCCTAGCCCAGCCACTGTGGTATTAGCTTAGCCTCAGCCATTGAAT  
AATACCAGTGCATATATATACACATATTGTTTTGCTCAGTGAGCATTCAAGTAAGTC  
GCAAGTAAACACTACTTGTGCGATACTATTCTAGCTGTTGTGAAAACCTTACAAATA  
AGGATGAGTAAACAAGGGCTCCCCTGGGTCAGGAAGTCTGGACTTCCAAGGTGTTGT  
GCAGGACTTGT CAGAATATCCACGAAAGAGCTAGAGCGCCTTAACAAGTATACTGT

CGCAGAGTGTGAGGGAGAAATGCAGAGGCTGATGTCCGGTCGTGAGTCAACCCACGG  
GAGAAACCCGCTGACTCAAGAGGTAGTGGGCCAGCTGGCATTGCTATGCCATCAG  
AAAGCCCAACTGGAGTCCGCAGAATCTGCTGAGAAGATCGCGGCCCTACACAGTAG  
CTACTTAGCTGAGCAAAAGACCGTCACCCATCTAGAGCATAGCTTAGAGGTAATGA  
AAAGGGAACCTGGAACAACCTCGAGGAGAGCTATAAGAGGTTGCAGCGAGACCATGA  
CATACCCCCTAGGTCCCGAACAGTTCACCAGGAGGAGGTAGGAGATAGGAATGAAA  
ATCAGTGCAGACAAATAGGTATGGCGGCTCAGTCAAGTGACCAAGAGCTGGACAAA  
CCTGGTCTTGGGAGTGAGACTTTCCACAGCCTAGAGGCCCCCAAAGTCAGTCCCCACA  
AACCGGACCAATCTAGCACAAAGAGAGCCCCGTGGGTCTTTGGAGAAGCGACCCC  
AGCTCACGCCACAAGGGCACTCATTCAAACCTTACCTCACTACTGACACCCCAGT  
CTACTACGCATCGACCATAGCCCATGGTAGCGTAGTCAGGGGAACAGGAAGACTGA  
ACAGGGACAGGTATGCACCCATGGATACGCCAATCCACAGAAATGTACTCCCGAGT  
TACCCCCAGCCAGAGCCACACCTCGAAGACCAGAGATGGCAAGGTCCTAGTAGAGA  
AACCTACTTTAAGCCTGAGCCACTAATGGTAGATATGAGCCACTGCCACCCAGTGG  
GGGATACCTTCTCGCAACGCCCCCCCCCCCTACGCCCTCACCCAGTCCCTTACTACGG  
GGGCGACTCAAGCTCAGAGGACTCTGACATTGTGAACCCTGTCCCAAGGCGGGGAGA  
TACGCACACGCCAACTCGAATCTATGGCTAAGGACATTGAGCGCTTTGATCCCAGTG  
ACAGGGAGTCCACCATAGATGACTACCTGCGGGAAGTTGAGCGGTGCCTCCTGGAC  
TTGCCTGAAGCAACAGCTCGCGAAAAGCTGAAGCTGATCTGGAAGACCACGGCTAG  
AAGTGTGCATAGTTTTATAGAAACCCTTCCCTGCAGCATACTGACAGTTACCCAAG  
GCTCTGTGATGCCCTTAGGGAAGAGTTCTCGCCCTTACTGACTCTGCCGCTGCCAC  
CCTTGGAGCATTGAGGTCCTGCACAAAAGGGACGAATCTCCAAGGAATATTATA  
GGCGCCTCCGAGCAGCCTACTTCCAGGGTCACAATGCCCCAGGTCTAGAGGAAGAC  
AGCGCATTCCGATCCCTCTTCTGCATAACCTCCACGAGAGCATTCCGGTATGAGGTG  
ACAATGCATAGCCAATCAGGTGACTCACTATGCAGGAACTCCGAAAATACGCGCA  
AATGGCCTGGCAAACCCGCGCACGACCAAGGCGTCCGCCCTGACCGGGACGCCAGAG  
TCCTGGGCATCCAAACTACGGACGACTTGGCGTTAGAAGGCCAGAATTACAGCGG  
GGAAGGGGAGAAAATAGAGTACAACCCCATGCCACAGAGTTTTCCCATAGGCCCGG  
GAGTCGACCCAGACAAGGTGGGGAACACACCCACCGGGCCTCAGAGAACAAACCAA  
CAGTATGACACTGCACCACAGAGATATAAGGGACGGAGTGAACAAAAGTCAGCTCC  
GAAAGGGAAGTACAGTAGAAAGGCTGATAACCATCTCAGTGCAGAACTGAGAGCA  
GCCATTGCGCAAGGCATAGCTGATGCTCTGGCCACGCAAAAATGCACCTGGGGGTTT  
CGCCCCGCTCAGAAATCCCCAAAAAAGCAAATAAAAAGTGAACCGTCTAAGTGAC  
TAAGCCGGGACCCGCTCCAGAAAGCCGCAAGGGTTTACCTCGTAGGCTGGGGGAGA  
GAAGCTGGCGTGCCCCAAGTAGACACTGCTCGTACACCAGACAACAACACTCCCC  
CTTCTTAACCTTCTTGGGAGACCTTGTCCGACAGGGTATGCCCGCCGCATTTACACGT  
CAGTGGTGATAGGGGGATGCTTCAGCTCCCTGGCCTTACTGGACTCTGGTTCTGAAA  
TCAGCCTAATGTCTTCAGATACTTTCAAGGCAATGTCCAGAACCATGTTGTCTCTTGG  
GAAACCCCTACAGGTGCAACCGTGTAAACATTAACATCACTAGTTACACACAAGACA  
AGTCCCCCATTGTTGAACGAGCCTGGGTTACTATTGCTTTCCAAGAGGTAACCTTTGT  
GCACCCTTTGTATATCTGCAATCTTGACACAGAGCCAGTGCTTATTGGCCAAGATCT  
GTTGGGCCGAGTGGCACCTCTTATTGACTGTCACAGAGGTCGCATCTGGGCCAGGT  
GAAAGTCCCCAAACCATTGGATCTTGGGGACAACCGACCAGGATGTGACGGACAGG  
TCACTGCAGTGGAGAGGCAAGGCCAAGAGTCCAACCCAGCTCTGAGGTGCCAGAC  
TTGCCAAACTCCTTCCAGACCCATGGTTTCAATTTCTCTGCGCTCTGACAAATGAGGGC  
CAAATCATCTACAGCCAAAGATCGTGGGGGGCATTTCATCTTGACAACCTTCTGTG

CCTGAGGCGCAACTGACACTCCGGTCAGAAAAGACCGCCATCAGCCAGGAATTGTA  
TGACGCCTTGTGCTTGAACGACCACCTCCCACCTTCGTGCAGCATAGTCATAGGCT  
CCTCCCAGCAGATCAGTCAAGACCCCTCCTTAAGGCAATCGGGGTCTGCGCCGCCAC  
CATTTCGAATTGGGGGTCGGGTCATCAAACATTTCTAAGTGTAGTTCCCCACTTGCA  
GCCGCCTGCTCTTGTGGGCGCCGATCTCCTTGTGCGGCTAGGTACGCACCTTGACAC  
CATCAACCAAGTCTTATGGTTCGACAGGTACGCCAAGAGACACCTCACAAAGTCCTG  
AAATAGAGAACATGAAATCGGGACAGACCATTCCCCACGCGTGCCAAGTTGCTGCG  
GAGAGCGACAAGACCATTCCCCCAGAACGGCAGGTAACCCGGTCCGTCTAGTAGT  
CATGAAGGGGCAGAAAATCCATGGCTCACAAAGCATTCTTCCAACCCCTTCTAGTTT  
CGCCGAACTTAACCTGACGGTCTGTGGCACCCCTCTCCTAGAACTGGACAATCGTGC  
AACCTACCTCTTGGTTCAGAATCCAACCAATGCACCGATCCTTGTTAAGGCCAACA  
ACCGCTGGGCGTCTTGGTAGAAAGTTCGTTTCATGACTTTGAGCTGACGGTACCCGT  
CATTGGGGAATTACCAGCGTCTCTAATCAGGGAGGGAAGTGTGGGAGACGTCCTCC  
TGTCTACCCAACGGGGATGATCTCTGTATTGCGCTATGAGCCACTGAGAGACCAAC  
CAATCTGTGGGGCAACACTTGAACCAGGGGGTGACATGCTGGTCTATACCTTGGCTG  
CCCAGCCAGAGTGCCTGCCCCAAGCGGGAACCAACACCTCTCCGGCGGGAGAGGAA  
CCTTACCCCGGCTTTGAAGCAGAAATCAACCAGCAACTTGAAAAAGCGGACGCATT  
GACAAATGAGGGGCAAAAAGAAGCCCTTCGAGATCTCTCCGCGAATTCAAACCA  
TCTTCTCACGAGATTCGCATGACTGTGGGGTCACTGACTTACACACCGTGCGCATTC  
CCACTGACCCCATGCACCACCAACGTTTGTGCGACAGTATAGGATTCCTCTGGCAG  
CATATGAGTCAATCCAAGAGATTCTGGACACACTGCTGAAGAAGGAGATCATAAGG  
GAATGTAACCTCGACATATAACTCGCCGATCTGGCCGGTTCTGAAACCGACAGGGAA  
ATGGCGTCTTACCATCGATTACCGACCCTTGAACAAAAACGTTCCCTTGTCTCGATG  
GCCCATGATTCACTTAGACCAAGAAGTGGCTAAGATAAAAAGACGCCCATTTCTTCTC  
CACTGTAGATGTTGCCAATGGCTTTTGGACCATGAGAGTGGATCCAGCTGACCAGTA  
TAAACTGGCCTTTTCTTCCGGCAACCGCCAGTACACCTGGAACCGTTGCCCTTCCG  
GTACTCAAACCTCCCCTGCAGAGTTCAATATCTTCTCCATAAAGCAATGAGTGACGC  
TGCCGCTCGCGGTAACCTCATCTACGTAGACGATATCCTCATGAGGAGTCAGACATT  
TGAAGGACACTTGGCAGAAATCCGACATGTGCTCTCACAACCTCGGCTGCAGGAG  
CCAAGTTAGCATTAAACCAAGGGTCAGTGGTGTGCAACCAAGGTGAAGTATGTCGGG  
CTGACAGTGGGCCAACATGGTATTGAGCCTCAGGCAGACAGAATCCAGGCTATTAG  
AACCATTAAGCCCCAACACACTGTCAGGACTCAGGAGCTTCTAGGGGTCTGTA  
ACTACTCACGCCAGTTTGTAGAAGACTATGCGGAGATAGCCAGACCCCTCACAGAA  
CTCCTTCGTAATGATACTCCCTATATATGGACGGAGCGCCAACAACAGTCATTTGAG  
AAAATGAAAGAAGCGCTCAGCACAGCCCCGTGCCTAGCTTATCCTGACAAGGATAA  
AGAATTCTATCTGGAAGCTAGCTTCTCCAACAAAGCCTCAGCGCTGCTCTGGCCCA  
AAAACATGACACAGACAAACGTGTTGTCGCCTATGCAAGCCGCCACTGAGTAGCG  
TGGAGATTAAGTTCTCAGACTGTGAGAAAGCCTTGCTAGCCACCATCTGGGCTGTGG  
AACATTTCCGCAGTTACATTGGTGGTCAAAGATCATCATTGAAACTTGTACCAAC  
CTGTGTCGTTCTTGAACAGCCAGAGGCTCAGAGAAGGCAGAGTTTCCAACAGTCGC  
ATTGCCGCGTGGATGATGGCCCTACAGGGCTATGATGTTGAAGTGAAGTACTCAA  
GAGTCACAAGGTAACACTCACCAAGGGCTAGCAGACTGCCAACACTGCGACTGTG  
AGGGACAACCAGATCCGTCACCGCTGGTCACAATCTCACCGACGCTTCCCTCTAACC  
ACCACTACTTCAATGAAAATGCCTGCCAGGGCCTCCCTGAAGTTTATGTGGACGGCT  
GCTCCTTCCGCTGTGACAGCCAACTCAGGGCTGGAGTAGGTATCGTGTGGGCCAATC  
GCCAGTTTGGAGGAGCCAAACCACTACCTGTTAGGCCCTAAAACAAGCCAGTATGCA

GAGATTGCCGCCGCTTTGATTGCCATTCAACAGGCAGCCAGACAAGCTCAATCGCA  
ACTTGTGATATGCTCAGACTCAAACCTATGCCCGCCACAGTTTCATCTCTCACTTCCCC  
ACATGGAAAGCCAGTGGGATGAAGAACGCCAGGAACAAACCTGTAAAACACGCAG  
AGTTATTCCTGGCATGCGATCAACTGGTAACAGACAAGGAATGACGGTGTACTGG  
CGGAAAGTCAAAGGTCATTCCCAAACCTCTGGCCAGACAAGAGGGGAACGATGA  
GGCAGACCGCCTGGCGAGACTGGGAGCAGAGGAGGGCCCCCTGTGGGAACCTCAAC  
CTGACGGGCTCCCAAACCTCCCAACAGCTGTACGGTTAATGCAGTCACCCGTAGGCAGT  
CCAGAGAACAGCAACATAGCCAGCCTGACAAGTACGAGATTCTGCACCTGGGTAGG  
AAACCAGGAGATGCGGATCTCATCACCATGCAGGAACAGGACCCACCATCTGCGC  
CGCCAGGAAGTGGGTAACCAACCCACCAGCAGCGGAGTCACTCCCTGACAGAACAG  
AGGAGCTGAAAGACCTGGGAGCAATGAGGCATGCCCTACCGCACCTGAGGCTGGAG  
AAAGGCCTATTGGTGTATGTCCATCACAAACCAAGGACCAATCCGCTGGGTTGTCCCC  
ACAGACCATAGGGGGGTGATGCTCAATCATGCCATGATTACCCAGTAGGGGGTCA  
CCGAGGCTACAAGGCCACTCTCCAGACCTTGCAGCAAGTGGCATACTGGCCCTCTAT  
GAGTAAAGATGTGAAAATCCATGTACAAAGTTGCCTGGTTTGCTGTCAATTCAACCC  
ATCACGACCACTAACAGGGCCCCACTTCAGAAAAGGGGTATGACATTCCCCTGGT  
CCCACATCCAAGTAGATTGGATCGGACCCGTCCCAAATCCTCCAGAGGTAATAAA  
TATCTCCTTACAGTGACCTGTGCATTTACCAAGTGGGTTCGAGTGCCTGCCAGCACA  
AATGACACAGCCGTCACCACCGCAGTCCTTCTACTAAACCATGTGTTTCAGCCGTTGG  
GGGCTGCCATTGTTCAGTCGACACAGACAGAGGGACACATTTACCTCCCATGTCATG  
ACCGAACTATAACCATATCCTAGGGGTGAACGTGAGATTCCACATATCTCACCACCCT  
CAATCATCAGGACAAGTAGAGCGTGCAAACCGCACCATTTGTCCAGATGCTTAAGAA  
ATACGTGAGCAGCCACGGCAAGGACTGGGACATGAAGTTGCCCTGGTGCTAATGG  
CTATCAGGGCCACCCACACAGAGCTACAGGTGTACACCTTTTCGAGATGATGACTG  
GAAGACAAATGACTTTACCCCTCCACCTCCTTACCAGGCAGAAGACGTCAGTGTGG  
TGACAGCCTACACCGCACACCAGTACGTGTCTGACCTGCGGGAGCACCTTCAGACG  
ACCTTTGCTTGGGCCCAAAGCAACTTGGGATCCAGTGCAGAGGGAGCCAAAGCCTA  
TTACGATAGAAAAGCATCCCACCGAGAGTACGAAGTAGGCGATAAGGTCCTGTACT  
TTCAGTTCGCAAACCTGTCCGACGCTCTGCAAAGTTCCTACCCAGCTGGTCAGGCC  
CCTTTGAGATTGTTCGGAAAACCTCTCCCCGGTAGCCTATAGAATACAGGTTTCAAAGC  
CCAGAAAGTCACCGGCATACAGATGGGTCCATGCAAACCAGATAAAGCCCTTCAAG  
CTTAACGTTTCCCAGCCAGGGGAAGCTGCTGTGTCAACCCAAAAGGACGAGCAGCC  
AACCCCTCGTAGCAACAACCTAACTCACAACCAGTCAGGGCAGCATGCTTAACTCCA  
CCTGCATGCACCGTAAGGCATAAATCCAACCCTATAATAACCAGAGCTTCATCTGTT  
GCAGATGAAACTCCCTTGGGCCATCATCATCCTCAACATACAGTGGGCCCTCTCCAT  
TGAGATAACCGAACCTGGCCCCGCCAGCCGGCATCGTCCTACAAAACGTACCTGGCC  
TTCTGATCACACATTGCCGTCTTTACACCCAGAGGATCTATGTCCGACTAGACCCCT  
GGGACGCCTATCGCAATCACATCCACCTACCCCTCGGTTAACTGAAGGCAGGCCA  
AGCGGGACCCAAACCCACGAGACTGTGGAACACACCCGCTCCACAGTGATCCACGT  
CCTAGAACAGCTGCAGAAGTTCCTTGTACAGAGGCAGACCTCAGCGGCAAAGGAA  
GACCAAACGGTTCCTAGGAGGTCTAATCGCAGCAGCATCAGCTATCGGGTCCCTCT  
TCTCTATCGGCCTATCTGCCGCAAACCTCAGTTAGCCTTAGCACACTCCAGCGACACG  
TTACCGAGCTTGATGAAGAGATGCCAGAGGTTACCAAAGCTTAGCTTTCAACAGC  
AGGAGTTGCAGAGTTTAGGAAAGACAGTACAGGGTACTATAACGACAGTAAACCTC  
CACTCAGCTCTCCTCAACAACACCTTGCATGCCCTCGAAACCCTGTCAGGGATTGTC  
AAAGAAGACCTTACCTACGTACGAGTGGTGAGAGACTTGATGCAAGAACTCATCAG

AGAAGTCAGCTCATCAATCAACAGCCTCAGTAGTGGTAGAATCCCCACTTACTTAGT  
TAACTTAGATTTGGTCAGAGATATCCTAGGATCCGCCACCACCACAGTGGTGCAACC  
TTCGAGGTCCATCTAGCCTACAACCTAGGCAGTGCTATTCCCATAGCTGTAGACCC  
CAAGAACCTGGAAGTAGGCTTTATTCTGAATTTGCCAATCATAGAAACTAGGAATAT  
ATATAAGTTAAAGTCTGTGTTGAATGTAGGATTTTGGCAAGACAACGCTCACATTCT  
ACTTAAGACACCTCCAGTGCTAGCATAACCATAGTGAAGACCCATCTCTCTACCTCGT  
TCCAAATCTCAACCTCTGCACCAACACCAGGGACATCCATTGGGTCTGCCAAGTAA  
CCCTTTCATCAGGGACACGACCAACTCCCTATGCGGCCTTAGGCCCGACGCCCCCGA  
GCAAAGTGCCAGGGCAGCCTGTGACAGAGGGACAGAGCAGCAGAACCTAGGGTG  
GAACGAGCTGGCAACCGATGGCTACTCAGCACACCCGCCACCGAAGCCTTGATTGT  
CTATGACCACCATGACACAACCACTACGTTGGCCCTACCAAACCAAACCTGTTCTT  
AACGGTACCTCAGGGTGCTACCGTCCATATTGAGGACATCATCCTCCATTACCTCAG  
TTCAGAGAGACATGACACTGAGATTGAGATCATGGACGTGTTCAAGGGTTACAATA  
TCACGATTGATGACACCCTTCAGCGGCAACTCATGCTAGAAGGGACCAAATTGGTA  
AAGTTTAGCCTCAGGCAGACGGGGCTGACCACAACCTACGCGGATCAGGTGACTCG  
CCCGGTAACCTACAGCGAACACCCAATCAGCATGGTCGCGTTGGGACTCCTTCTTAG  
TGGTTGGGTCATTACAGCAATGGTAGCATAACGGAATGTACAAATATATCAAGGAATT  
ACAAGCTAGGTTAGATTCTGCCCTGGTAGTGCCAGTACGCTTTCCCCCACAGCTTAA  
CGCACCTACATTCAACTTAGCCGCCAGGACCTAAGACACCCCAGGCTCCTGTCTTCC  
TCTCTCACACACATCTGTCCTTATCTGTCCTATCTTCCCTTTGCTCGTTTATTATTTTC  
CTTCATGGTTAACAAGAACCTTATGATGGTAATATCTAGAAATATTAGACTGTTGAC  
TCTGCTCAGACATTGCTTTTGCCCTCTGCTCAGACATTGCTTTTGCCCTCTGCTCAGACA  
TTGCTTTTGCCCTCTGCTCAGACATGCCTCTAAAATGCTCAGACTTGCCTCCAACCTTA  
GCAAACAAGGACTGTTTGGAAATACATGGACTGTCAATGAACATTGATAATGCCAC  
AGGAGATGACAAGTACACTGAGGACCTAACGAACCTGTCAGAGCACATGGACCCT  
TTCAACGTCTTGTTCCGAAGCGACGGCTGACACGCCATCATTCAGAACAAAAGGG  
GGGATGTTGGGGGACCTCATATGTATAATCTGTTATTAACAGAATTATTATTAAGGT  
CCCACATGCTCAGACAAAGGAAATACTGCGGCCTGCATGTAAAGTCCTCATCCTGAT  
AGTAGTGAATGAGAACAAAGAGATTTCAAATCTCGGCGCCAAAACCAGGCGCCAGG  
CTGGGGAACACACCTGGCTCCCCGCTGTGAAGGCCGAAACCCCGCTGACACAAGC  
GACAAACGGAGGAGAAACTTGGACGTCAGCCATCCTGATTGGACCAAACAATAGGA  
TGGGCGTGACCAAAAACACGGTTATAAAAGTCGCCGTGACCCAAGACTCGTCCCTT  
GTCCTCTTCGATCACCCGTTACCCCTTGTTCTCCCCCTTGTTCTCTTCGATCTCCCGTT  
TCCCCTTCTCTCTTCGACCCTCTCGCTGCCCCACCTGGAGCTTCCCTCGGCACCAGC  
ACGCCTGAAGCCTCCACCGCAGCCAGCAGCTGAACCAACGGAGACGTCGTACAGAA  
GAACGGGCCTGATCACCCATCTACTTCCAGCCATACGGCAGGAAACCGCCAGCTTA  
ACCGCCTCACTCGCCCGGCATCAGCTGATCACGACGCGATCACCGCGACGCACAC  
CTGGACCGGACCGGACCGCAACAGAGCAAGCACGCACGCACGCACGCACGCAACG  
CCGGAGCTTCTCACCAGGATTGAGCAGTAAGGCAGAGGCATTCTTAAGTCTGAGCA  
GAGTAGAACTCTTAGGGTATCAGTAATTGTTTTATTGTTGTGTTTCTTTTCCTGCACA  
CACGATCTGACCGCTGTGTATTTCCGCGATCACGTGACTGTAACGCTGTTACAGATC  
TACGTGAATCTAAGAGGTGCACATTGAAGTGTTGTAACCTGTGATTTCGCTAGCTTA  
AGTGCTTTATTGTGTTACTGTGTAGTGCTCTGTTTCTGCTGCGACCACGCCAAGCGCA  
CGTTTCAACCACTGCACGCTTCCGCGATCACGTGACTATATCGCAGAATATAGCCCC  
ACGTGTTTGTGTGACCACGAGCCTTATCCACGCTAGTCCCCTTACACTCCTTTACA  
CGCTTCTTTCCCTGTGAGCGCCAGACACGCGCGCTCCATTCAAAGGGCTCACCGGCA

CACGCGCGCAGCTGTGCCACCTCACCACGCCCTAAAGGGGGGCGCTCTCCTCCTCC  
TCCTCTTCTCTCTTTCTCTCTCTCTCTCACCCCTCACACACATATACACACACAC  
ACACACACACACACCCCTCTTATCTCAGGTAACGCGCATAACACATAACAGAACGCTA  
GACGAACACACCATATAATTAAGTTGTGATTTGCTGAGTTATTCAAGATAGTGTTGA  
CACTAGAGTTAATATTAAGTTAATAAAGCGTTCATAATTTAACTAGTCGTTGTTT  
GTGATTATTTGTATATGGTTTTGCAGCACTAGTGAATTGAGTCGGCTATGGTACGGA  
GTTACCCCTTCAACTAACTTAAATACAAATGAGACTGTATTGGCTATCCCAAATCGG  
TTATTGGTCCCTGGAAACAGGGTGGTGCCCCGTAAATTAAGTAATTATTAATTCAAT  
TAATAATTATTAATCAATAATAGTAAGTGTTTCACTTGCCAAACTATAGACATTTG  
TCATATAGTTATATATATTTAAGCTAATAACCAAGATTTGTGAATCTAAATTATAAA  
CATAATTGGTATCTCCACTCAGGAGCTATAAATCCAATTATTATAATTTGTGCTCCTC  
GCATATCCCCAACAGAAGTGAACAAATTT

> Loki-Bsp consensus sequence 5'LTR

TGTTGGGGGACCTCATATGTATAATCTGTTATTAACAGAATTATTATTAAGGTCCCA  
CATGCTCAGACAAAGGAAATACTGCGGCCTGCATGTAAAGTCCTCATCCTGATAGTA  
GTGAATGAGAACAAAGAGATTTCAAATCTCGGGCCAAAACCAGGGCGCCAGGCTGG  
GGAACCACACCTGGCTCCCCGCTGTGAAGGCCGAAACCCCGCTGACACAAGCGACA  
AACGGAGGAGAACTTGGACGTCAGCCATCCTGATTGGACCAAACAATAGGATGGG  
CGTGACCAAAAACACGGTTATAAAAGTCGCCGTGACCCAAGACTCGTCCCTTGTCCT  
CTTCGATCACCCGTTACCCCTTGTTCTCCCCCTTGTTCTCTTCGATCTCCCGTTTCCCC  
TTCCTCTCTTCGACCCTCTCGCTGCCCCACCTGGAGCTTCCCTCGGCACCAGCACGCC  
TGAAGCCTCCACCGCAGCCAGCAGCTGAACCAACGGAGACGTCGTCACAGAGAACG  
GGCCTGATCACCCATCTACTTCCAGCCATACGGCAGGAAACCGCCAGCTTAACCGCC  
TCACTCGCCGCCGCATCAGCTGATCACGACGCGATCACCGCGACGCACACCTGGAC  
CGGACCGGACCGCAACAGAGCAAGCACGCACGCACGCACGCACGCAACGCC  
GGAGCTTCTCACCAGGATTGAGCAGTAAGGCAGAGGCATTCTTAAGTCTGAGCAGA  
GTAGAACTCTTAGGGTATCAGTAATTGTTTTATTGTTGTGTTTTCTTTTCCTGCACAC  
ACGATCTGACCGCTGTGTATTTCCGCGATCACGTGACTGTAACGCTGTTACAGATCT  
ACGTGAATCTAAGAGGTGCACATTGAAGTGTGTAACCTGTGATTTTCGCTAGCTTAA  
GTGCTTTATTGTGTTACTGTGTAGTGCTCTGTTTCTGCTGCGACCACGCCAAGCGCAC  
GTTTCAACCACTGCACGCTTCCGCGATCACGTGACTATATCGCAGAATATAGCCCCA  
CGTGTGTTGTGACCACGAGCCTTATCCACGCTAGTCCCACCTTCACTCCTTTACAC  
GCTTCTTTCCCTGTGAGCGCCAGACACGCGCGCTCCATTCAAAGGGCTCACCGGCAC  
ACGCGCGCAGCTGTGCCACCTCACCACGCCCTAAAGGGGGGCGCTCTCCTCCTCCT  
CCTCTTCTCTCTTTCTCTCTCTCTCTCACCCCTCACACACATATACACACACACACA  
CACACACACACACACCCCTCTTATCTCAGGTAACGCGCATAACACATAACAGAACGCTA  
GACGAACACACCATATAATTAAGTTGTGATTTGCTGAGTTATTCAAGATAGTGTTGA  
CACTAGAGTTAATATTAAGTTAATAAAGCGTTCATAATTTAACTAGTCGTTGTTT  
GTGATTATTTGTATATGGTTTTGCAGCACTAGTGAATTGAGTCGGCTATGGTACGGA  
ATTCACCCTTCAACTAACTTAAATACAAATGAGACTGTATTGGCTATCCCAAATCGG  
TTATTGGTCCCTGGAAACAGGGTGGTGCCCCGTAAATTAAGTAATTATTAATTCAAT  
TAATAATTATTAATCAATAATAGTAAGTGTTTCACTTGCCAAACTATAGACATTTG  
TCATATAGTTATATATATTTAAGCTAATAACCAAGATTTGTGAATCTAAATTATAAA  
CATAATTGGTATCTCCACTCAGGAGCTATAAATCCAATTATTATAATTTGTGCTCCTC  
GCATATCCCCAAC

> Loki-Bsp consensus sequence 3'LTR



GTTGGGGGACCTCATATGTATAATCTGTTATTAACAGAATTATTATTAAGGTCCCAC  
ATGCTCAGACAAAGGAAATACTGCGGCCTGCATGTAAAGTCCTCATCCTGATAGTAG  
TGAATGAGAACAAGAGATTTCAAATCTCGGCGCCAAAACCAGGCGCCAGGCTGGG  
GAACCACACCTGGCTCCCCGCTGTGAAGGCCGAAACCCCGCTGACACAAGCGACAA  
ACGGAGGAGAACTTGGACGTCAGCCATCCTGATTGGACCAAACAATAGGATGGGC  
GTGACCAAAAACACGGTTATAAAAGTCGCCGTGACCCAAGACTCGTCCCTTGTCCCT  
TTCGATCACCCGTTACCCCTTGTCTCCCCCTTGTCTCTTCGATCTCCCGTTTCCCCT  
TCCTCTCTTCGACCCTCTCGCTGCCCCACCTGGAGCTTCCCTCGGCACCAGCACGCCT  
GAAGCCTCCACCGCAGCCAGCAGCTGAACCAACGGAGACGTCGTCACAGAGAACGG  
GCCTGATCACCCATCTACTTCCAGCCATACGGCAGGAAACCGCCAGCTTAACCGCCT  
CACTCGCCGCCGCATCAGCTGATCACGACGCGATCACCGCGACGCACACCTGGACC  
GGACCGGACCGCAACAGAGCAAGCACGCACGCACGCACGCACGCAACGCCGGAGC  
TTCTCACCAGGATTGAGCAGTAAGGCAGAGGCATTCTTAAGTCTGAGCAGAGTAGA  
ACTCTTAGGGTATCAGTAATTGTTTTATTGTTGTGTTTCTTTTCTGCACACACGATCT  
GACCGCTGTGTATTTCCGCGATCACGTGACTGTAACGCTGTTACAGATCTACGTGAA  
TCTAAGAGGTGCACATTGAAGTGTTGTAACCTGTGATTTTCGCTAGCTTAAGTGCTTT  
ATTGTGTTACTGTGTAGTGCTCTGTTTCTGCTGCGACCACGCCAAGCGCACGTTTCAA  
CCACTGCACGCTTCCGCGATCACGTGACTATATCGCAGAATATAGCCCCACGTGTTT  
GTGTGACCACGAGCCTTATCCACGCTAGTCCCCTTACACTCCTTTACACGCTTCTT  
TCCCTGTGAGCGCCAGACACGCGCGCTCCATTCAAAGGGCTCACCGGCACACGCGC  
GCAGCTGTGCCACCTACCACGCCCTAAAGGGGGGCGCTCTCCTCCTCCTCCTCTT  
CTCTCTTCTCTCTCTCTCTCACCCTCACACACATATACACACACACACACACACA  
CACACACCCCTCTTATCTCAGGTAACGCGCATAACACATAACAGAACGCTAGACGAAC  
ACACCATATAATTAAGTTGTGATTTGCTGAGTTATTCAAGATAGTGTTGACACTAGA  
GTTAATATTAAGTTAATAAAGCGTTCATAATTAAGTACGTTGTTTGTGATTA  
TTTGTATATGGTTTTGCAGCACTAGTGAATTGAGTCGGCTATGGTACGGAGTTCACC  
CTTCAACTAACTTAAATACAAATGAGACTGTATTGGCTATCCCAAATCGGTTATTGG  
TCCCTGAAACAGGGTGGTGCCCCGTAATTAAGTAATTATTAATTCAATTAATAAT  
TATTAATCAATAATAGTAAGTGTTCACTTGCCAACTATAGACATTTGTCATATA  
GTTATATATATTAAGCTAATAACCAAGATTTGTGAATCTAAATTATAAACATAATT  
GGTATCTCCACTCAGGAGCTATAAATCCAATTATTATAATTTGTGCTCCTCGCATATC  
CCCAACAG

> Loki-Bsp consensus sequence *gag* gene

TTGTGCGATACTATTCTAGCTGTTGTGAAAACCTTACAAATAAGGATGAGTAACAAG  
GGCTCCCCTGGGTCAGGAAGTCTGGACTTCCAAGGTGTTGTTGCAGGACTTGTGAGA  
ATATCCACGAAAGAGCTAGAGCGCCTTAAACAAGTATACTGTGCGCAGAGTGTGAGGG  
AGAAATGCAGAGGCTGATGTCGGTCGTGAGTCAACCCACGGGAGAAACCCGCCTGA  
CTCAAGAGGTAGTGGGCCAGCTGGCATTGCTATGCCATCAGAAAGCCCAACTGGAG  
TCCGCAGAATCTGCTGAGAAGATCGCGGCCCTACACAGTAGCTACTTAGCTGAGCA  
AAAGACCGTCACCCATCTAGAGCATAGCTTAGAGGTAATGAAAAGGGAAGTGGAAAC  
AACTCGAGGAGAGCTATAAGAGGTTGCAGCGAGACCATGACATACCCCTAGGTCC  
CGAACAGTTCACCAGGAGGAGGTAGGAGATAGGAATGAAAATCAGTGCAGACAAA  
TAGGTATGGCGGCTCAGTCAAGTGACCAAGAGCTGGACAAACCTGGTCCTGGGAGT  
GAGACTTTCCACAGCCTAGAGGCCCAAAGTCAGTCCCCACAAACCGGACCAATCT  
AGCACAAAGAGAGCCCCGTGGGTCTTTGGAGAAGCGACCCAGCTCACGCCACAA  
AGGGCACTCATTCAAACCTTACCTCACTACTGACACCCAGTCTACTACGCATCGA

CCATAGCCCATGGTAGCGTAGTCAGGGGAACAGGAAGACTGAACAGGGACAGGTAT  
GCACCCATGGATACGCCAATCCACAGAAATGTACTCCCGAGTTACCCCGAGCCAGA  
GCCACACCTCGAAGACCAGAGATGGCAAGGTCCTAGTAGAGAAACCTACTTTAAGC  
CTGAGCCCCTAATGGTAGATATGAGCCACTGCCACCCAGTGGGGGATACCTTCCTC  
GCAACGCCCCCCCCCTACGCCCTCACCCAGTCCCTTACTACGGGGGCGACTCAAGCT  
CAGAGGACTCTGACATTGTGAACCCTGTCCCAAGGCGGGAGATACGCACACGCCAA  
CTCGAATCTATGGCTAAGGACATTGAGCGCTTTGATCCCAGTGACAGGGAGTCCACC  
ATAGATGACTACCTGCGGGAAGTTGAGCGGTGCCTCCTGGACTTGCCTGAAGCAAC  
AGCTCGCGAAAAGCTGAAGCTGATCTGGAAGACCACGGCTAGAAGTGTGCATAGTT  
TTATAGAAACCCTTCCCTGCAGCATACTGACAGTTACCCAAGGCTCTGTGATGCC  
TTAGGGAAGAGTTCTCGCCCTTACTGACTCTGCCGCTGCCACCCTTGGAGCATTG  
AGGTCCTGCACAAAAGGGACGAATCTCCAAAGGAATATTATAGGCGCCTCCGAGCA  
GCCTACTTCCAGGGTCACAATGCCCCAGGTCTAGAGGAAGACAGCGCATTCCGATC  
CCTCTTCTGCATAACCTCCACGAGAGCATTTCGGTATGAGGTGACAATGCATAGCCA  
ATCAGGTCGACTCACTATGCAGGAACTCCGAAAATACGCGCAAATGGCCTGGCAA  
CCCGCGCACGACCAAGGCGTCGCCCTGACCGGGACGCCAGAGTCCTGGGCATCCAA  
ACTACGGACGACTTGGCGTTAGAAGGCCAGAATTACAGCGGGGAAGGGGAGAAA  
ATAGAGTACAACCCCATGCCACAGAGTTTTCCCATAGGCCCGGGAGTCGACCCAGA  
CAAGGTGGGGAACACACCCACCGGGCCTCAGAGAACAAACAGTATGACTACTGC  
ACCACAGAGATATAAGGGACGGAGTGAACAAAAGTCAGCTCCGAAAGGGAAGTAC  
AGTAGAAAGGCTGATAACCATCTCAGTGCAGAACTGAGAGCAGCCATTGCGCAAGG  
CATAGCTGATGCTCTGGCCACGCAAATGCACCTGGGGGTTCGCCCCGCCTCAGAA  
ATCCCCAAAAAAGCAAATAAAAAGTGAACCGTCTAAGTGA

> Loki-Bsp consensus sequence Gag protein

LCDTILAVVKTLQIRMSNKGSPGSGSLDFQGVVAGLVRIKELERLNKYTVAECEGEM  
QRLMSVVSQPTGETRLTQEVVGLALLCHQKAQLESAESAEDIAALHSSYLAEQKTVTH  
LEHSLEVMKRELEQLEESYKRLQRDHDIPRSRTVHQEEVGDNRNENQCRQIGMAAQSSD  
QELDKPGPGSETFHSLEAPKSVPTNRTNLAQREPRGSFGEATPAHAHKGTHSNSYLTTDT  
PVYYASTIAHGSVVRGTGRLNRDRYAPMDTPIHRNVLPSPYQPEPHLEDQRWQGPSRET  
YFKPEPTNGRYEPLPPSGGYLPRNAPPLRPHPVPYYGGDSSSESDIVNPVPRREIRTRQL  
ESMAKDIERFDPDSRESTIDDYLRVERCLLDLPEATAREKLKLIWKTARSVHSFIETLP  
CSIRDSYPRLCDALREEFSPFTDSAAATLGAFEVLHKRDESPKEYRRLRAAYFQGHNP  
GLEEDSAFRSLFLHNLHESIRYEVTMHSQSGRLTMQELRKYAQMAWQTRARPRRRPDR  
DARVLGIQTDDDLALEGPELQRGRGENRVQPHATEFSHRPGSRPRQGGGEHTHRASENNQ  
QYDTAPQRYKGRSEQKSAPKGKYSRKADNHLAELRAAIAQGIADALATQNAPGGSAP  
PQKSPKKQIKSEPSK\*

> Loki-Bsp consensus sequence *pol* gene

CTGGGGGAGAGAAGCTGGCGTGCCCCAAGTAGACACTGCTCGTACACCAGACAACA  
AACTCCCCCTTCTTAACCTTCTTGGGAGACCTTGTCCGACAGGGTATGCCCGCCG  
CATTACACGTCAGTGGTGATAGGGGGATGCTTCAGCTCCCTGGCCTTACTGGACTC  
TGGTTCTGAAATCAGCCTAATGTCTTCAGATACTTTCAAGGCAATGTCCAGAACCAT  
GTTGTCTCTTGGGAAACCCCTACAGGTCGAACCGTGTAACATTAACATCACTAGTTA  
CACACAAGACAAGTCCCCATTGTTGAACGAGCCTGGGTTACTATTGCTTTCCAAGA  
GGTAACTCTTGTGCACCCTTTGTATATCTGCAATCTTGACACAGAGCCAGTGCTTATT  
GGCCAAGATCTGTTGGGCCGAGTGGCACCTCTTATTGACTGTACAGAGGTCGCATC  
TGGGCCAGGTGAAAGTCCCCAAACCATTGGATCTTGGGGACAACCGACCAGGATG

TGACGGACAGGTCACTGCAGTGGAGAGGCAAGGCCAAGAGTCCAACCCCAGCTCTG  
AGGTGCCAGACTTGCCAAACTCCTTCCAGACCCATGGTTCATTTCTCTGCGCTCTGA  
CAAATGAGGGCCAAATCATCTACAGCCCAAAGATCGTGGGGGGCATTTCATCTTGAC  
AACCTTCCTGTGCCTGAGGCGCAACTGACACTCCGGTCAGAAAAGACCGCCATCAG  
CCAGGAATTGTATGACGCCTTGTGCTTGCAACGACCACCTCCCACCTTCGTGCAGCA  
TAGTCATAGGCTCCTCCAGCAGATCAGTCAAGACCCCTCCTTAAGGCAATCGGGGT  
CTGCGCCGCCACCATTTCGAATTGGGGGTCTGGGTCATCAAACATTTCTAAGTGTAGT  
TCCCCACTTGCAGCCGCCTGCTCTTGTGGGCGCCGATCTCCTTGTGCGGCTAGGTAC  
GCACCTTGACACCATCAACCAAGTCTTATGGTTCGCAGGTTCAGCCCAAGAGACACCTC  
ACAAAGTCCTGAAATAGAGAACATGAAATCGGGACAGACCATTCCCCACGCGTGCC  
AAGTTGCTGCGGAGAGCGACAAGACCATTCCCCCAGAACGGCAGGTAACCCGGTC  
CGTCTAGTAGTCATGAAGGGGCAGAAAATCCATGGCTCACAAGCATTCTTCCAACCC  
CTTCTAGTTTCGCCGAACCTTAACCTGACGGTCTGTGGCACCCCTCTCCTAGAACTG  
GACAATCGTGCAACCTACCTCTTGGTTCAGAATCCAACCAATGCACCGATCCTTGT  
AAGGCCAACAAACCGCTGGGCGTCTTGGTAGAAAGTTCGTTTCATGACTTTGAGCTG  
ACGGTACCCGTCATTGGGGAATTACCAGCGTCTCTAATCAGGGAGGGAAGTGTGGG  
AGACGTCCTCCTGTCTCACCCAACGGGGATGATCTCTGTATTGCGCTATGAGCCACT  
GAGAGACCAACCAATCTGTGGGGCAACACTTGAACCAGGGGGTGACATGCTGGTCT  
ATACCTTGGCTGCCAGCCAGAGTGCACCTGCCAAGCGGGAACCAACACCTCTCCG  
GCGGGAGAGGAACCTTACCCCGGCTTTGAAGCAGAAATCAACCAGCAACTTGAAAA  
AGCGGACGCATTGACAAATGAGGGGCAAAAAGAAGCCCTTCGAGATCTCTTCCGCG  
AATTCAAACCCATCTTCTCACGAGATTCGCATGACTGTGGGGTCACTGACTTACACA  
CCGTGCGCATTCCCCTGACCCCCATGCACCACCAACGTTTGTGCGACAGTATAGGA  
TTCCTCTGGCAGCATATGAGTCAATCCAAGAGATTCTGGACACACTGCTGAAGAAGG  
AGATCATAAGGGAATGTAACCTCGACATATAACTCGCCGATCTGGCCGGTTCTGAAAC  
CGACAGGGAAATGGCGTCTTACCATCGATTACCGACCCTTGAACAAAAACGTTCCCT  
TGTCTCGATGGCCCATGATTCACCTTAGACCAAGAACTGGCTAAGATAAAAGACGCC  
ATTTCTTCTCCACTGTAGATGTTGCCAATGGCTTTTGGACCATGAGAGTGGATCCAG  
CTGACCAGTATAAACTGGCCTTTTCCTTCGGCAACCGCCAGTACACCTGGAACCGTT  
GCCCCCTCGGGTACTCAAACCTCCCCTGCAGAGTTCAATATCTTCTCCATAAAGCAA  
TGAGTGACGCTGCCGCTCGCGGTAACCTCATCTACGTAGACGATATCCTCATGAGGA  
GTCAGACATTTGAAGGACACTTGGCAGAAATCCGACATGTGCTCTACAACCTCCTGG  
CTGCAGGAGCCAAGTTAGCATTAAACCAAGGGTCAGTGGTGTGCAACCAAGGTGAAG  
TATGTCGGGCTGACAGTGGGCCAACATGGTATTGAGCCTCAGGCAGACAGAATCCA  
GGCTATTAGAACCATTAAAGCCCCAACACACTGTCAGGACTCAGGAGCTTCCTAG  
GGGTCTGTAACCTACTCACGCCAGTTTGTAGAAGACTATGCGGAGATAGCCAGACCCC  
TCACAGAACTCCTTCGTAATGATACTCCCTATATATGGACGGAGCGCCAACAACAGT  
CATTTGAGAAAATGAAAGAAGCGCTCAGCACAGCCCCGTGCCTAGCTTATCCTGAC  
AAGGATAAAGAATTCTATCTGGAAGCTAGCTTCTCCCAACAAAGCCTCAGCGCTGCT  
CTGGCCCAAAAACATGACACAGACAAACGTGTTGTGCGCTATGCAAGCCGCCACT  
GAGTAGCGTGGAGATTAAGTTCTCAGACTGTGAGAAAGCCTTGCTAGCCACCATCTG  
GGCTGTGGAACATTTCCGCAGTTACATTGGTGGTCAAAGATCATCATTGAAACTTG  
TCACCAACCTGTGTCGTTCTTGAACAGCCAGAGGCTCAGAGAAGGCAGAGTTTCCAA  
CAGTCGCATTGCCGCGTGGATGATGGCCCTACAGGGCTATGATGTTGAAGTGAAGTA  
CTCAAAGAGTCACAAGGTAACACTCACCCAAGGGCTAGCAGACTGCCAACACTGCG  
ACTGTGAGGGACAACCAGATCCGTCACCGCTGGTCAATCTCACCGACGCTTCCCT

CTAACCACCACTACTTCAATGAAAATGCCTGCCAGGGCCTCCCTGAAGTTTATGTGG  
ACGGCTGCTCCTTCCGCTGTGACAGCCAACTCAGGGCTGGAGTAGGTATCGTGTGGG  
CCAATCGCCAGTTTGTAGGAGCCAACTACTGTTAGGCCCTAAAACAAGCCAG  
TATGCAGAGATTGCCGCCGCTTTGATTGCCATTCAACAGGCAGCCAGACAAGCTCAA  
TCGCAACTTGTGATATGCTCAGACTCAAATATGCCCGCCACAGTTTCATCTCTCACT  
TCCCCACATGGAAAGCCAGTGGGATGAAGAACGCCAGGAACAAACCTGTAAAACAC  
GCAGAGTTATTCCTGGCATGCGATCAACTGGTAACAGACAAGGGAATGACGGTGT  
CTGGCGGAAAGTCAAAGGTCATTCCCAAACCTCTGGCCCAGACAAAGAGGGGAAACG  
ATGAGGCAGACCGCCTGGCGAGACTGGGAGCAGAGGAGGGCCCCCTGTGGGAACTC  
CAACCTGACGGGCTCCAACTCCCCACAGCTGTACGGTTAATGCAGTCACCCGTAGG  
CAGTCCAGAGAACAGCAACATAGCCAGCCTGACAAGTACGAGATTCTGCACCTGGG  
TAGGAAACCAGGAGATGCGGATCTCATCACCATGCAGGAACAGGACCCCACCATCT  
GCGCCGCCAGGAAGTGGGTAACCAACCCACCAGCAGCGGAGTCACTCCCTGACAGA  
ACAGAGGAGCTGAAAGACCTGGGAGCAATGAGGCATGCCCTACCGCACCTGAGGCT  
GGAGAAAGGCCTATTGGTGTATGTCCATCACAACCAAGGACCAATCCGCTGGGTTGT  
CCCCACAGACCATAGGGGGGTGATGCTCAATCATGCCCATGATTCACCAGTAGGGG  
GTCACCGAGGCTACAAGGCCACTCTCCAGACCTTGCAGCAAGTGGCATACTGGCCCT  
CTATGAGTAAAGATGTGAAAATCCATGTACAAAGTTGCCTGGTTTGTGTCAATTCA  
ACCCATCACGACCACTAAACAGGGCCCCACTTCAGAAAAGGGGTATGACATTCCCC  
TGGTCCCACATCCAAGTAGATTGGATCGGACCCGTCCCAAATCCTCCAGAGGTAAT  
AAATATCTCCTTACAGTGACCTGTGCATTTACCAAGTGGGTTCGAGTGCCTGCCAGCA  
CCAAATGACACAGCCGTCACCACCGCAGTCCTTCTACTAAACCATGTGTTCAGCCGT  
TGGGGGCTGCCATTGTCAGTCGACACAGACAGAGGGACACATTTACCTCCCATGTC  
ATGACCGAACTATACCATATCCTAGGGGTGAACGTGAGATTCCACATATCTCACCAC  
CCTCAATCATCAGGACAAGTAGAGCGTGCAAACCGCACCATTTGTCCAGATGCTTAA  
GAAATACGTGAGCAGCCACGGCAAGGACTGGGACATGAAGTTGCCCTGGTGCTAA  
TGGCTATCAGGGCCACCCACACAGAGCTACAGGTGTCACACCTTTTCGAGATGATG  
ACTGGAAGACAAATGACTTTACCCCTCCACCTCCTCTACCAGGCAGAAGACGTCAGT  
GTGGTGACAGCCTACACCGCACACCAGTACGTGTCTGACCTGCGGGAGCACCTTCA  
GACGACCTTTGCTTGGGCCCAAAGCAACTTGGGATCCAGTGCAGAGGGAGCCAAAG  
CCTATTACGATAGAAAAGCATCCCACCGAGAGTACGAAGTAGGCGATAAGGTCTCG  
TACTTTCAGTTCGCAAAACCTGTTCGGACGCTCTGCAAAGTTCCTACCAGCTGGTCA  
GGCCCCTTTGAGATTGTTCGAAAACCTCTCCCCGGTAGCCTATAGAATACAGGTTTCA  
AAGCCCAGAAAGTCACCGGCATACAGATGGGTCCATGCAAACCAGATAAAGCCCTT  
CAAGCTTAACGTTTCCCAGCCAGGGGAAGCTGCTGTGTCAACCCAAAAGGACGAGC  
AGCCAACCCCTCGTAGCAACAATAA

> Loki-Bsp consensus sequence Pol protein

LGERSWRAPS RHCSYTRQQHSPLL NLLGRPCPTGYARRIYTSVVIGGCFSSLALLDSGSEI  
SLMSSDTFKAMSRTMLSLGKPLQVEPCNINITSYTQDKSPIVERAWVTIAFQEVTLVHPL  
YICNLDTEPVLIGQDLLGRVAPLIDCHRGRWAQVKVPKPLDLGDNRPGCDGQVTAVER  
QGQESNPSSEVPDLPN SFQTHGSFLCALTNEGQIIYSPKIVGGIHLDNLPVEAQLTLRSEK  
TAISQELYDALCLQRPPPTFVQHSRLLPADQSRPLKAIGVCAATIRIGGRVIKHFSLSV  
PHLQPPALVGADLLVRLGTHLDTINQVLWSQVSPRDTSSPEIENMKSGQTIPHACQVA  
AESDKTIPPRTAGNPVRLVVMKGGQKIHGSAFFQPLPSFAELNLTVCGTLPLELDNRATY  
LLVQNPTNAPILVKAQQPLGVLEVSSFHDFELTVPVIGELPASLIREGSGVDVLLSHPTGM  
ISVLRYEPLRDQPICGATLEPGDMLVYTLAAQPECTAQAGTNTSPAGEEPYPGF AEIN

QQLEKADALTNEGQKEALRDLFREFKPIFSRDSHDCGVTDLHTVRIPTDPHAPPTFVRQY  
RIPLAAYESIQEILD TLLKKEIIRECNSTYNSPIWPVLKPTGKWRLTIDYRPLNKNVPLSRW  
PMIHL DQELAKIKDAHFFSTVDVANGFWTMRVDPADQYKLAFSFGNRQYTWNRCPFG  
YSNSPAEFNIFLHKAMSDAAARGNLIYVDDILMRSQTFEGHLAEIRHVLSQLLAAGAKL  
ALTKGQWCRTKVKYVGLTVGQHGIPEQADRIQAIRTIKAPNTLSGLRSFLGVCNYSRQF  
VEDYAEIARPLTELLRNDTPYIWTERQQQSFEKMKEALSTAPCLAYPKDKKEYLEASF  
QQSLSAALAQKHDTDKRVVAYASRPLSSVEIKFSDCEKALLATIWA VEHF RSYIGGQKIII  
ETCHQPVSFLNSQRLREGRVSN SRIA AWMMALQGYDVEVKYSKSHKVTLTQGLADCQ  
HCDCEGQPDPSPLVTISPTLPSNHHYFNENACQGLPEVYVDGCSFRCD SQLRAGVGIVW  
ANRQFEENHYLLGPKTSQYAEIAAALIAIQQAARQAQSQLVICSDSNYARHSFISHFPT  
WKASGMKNARNKPVKHAELFLACDQLVTDKGMTVYWRKVKGHSQTS GPDKEGNDE  
ADRLARLGAE EGPLWELQPDGLTPH SCTVNAVTRRQSREQQHSQPKYEILHLGRKPG  
DADLITMQEQDPTICAARKWVTNPPAAESLPDRTEELKDLGAMRHALPHLRLEKGLLV  
YVHHNQGP IRWV VPTDHRGVMLNHAHDS PVGGHRGYKATLQTLQQVAYWPSMSKDV  
KIHVQSCLVCCQFNPSRPLNRAPLQKRGMTFPW SHIQVDWIGPVPKSSRGNKYLLTVTC  
AFTKWVECLPAPNDTAVTTAVLLL NHVFSRWGLPLSVDTDRGTHFTSHVMTELYHILG  
VNVRFHISHHPQSSGQVERANRTIVQMLKKYVSSHGKDWDMLPLVLMAIRATPHRAT  
GVTPEMMTGRQMTLPLHLLYQAEDVSVVTA YTAHQYVSDLREHLQTTFAWAQSNLG  
SSAEGAKAYYDRKASHREYEVGDKVLYFQFAKPVGRSAKFLPSWSGPFEIVGKLS PVA  
YRIQVSKPRKSPAYRWVHANQIKPFKLNVSQPGEAAVSTQKDEQPTPRSNN\*

> Loki-Bsp consensus sequence *env* gene

CTGTTGCAGATGAAACTCCCTGGGCCATCATCATCCTCAACATACAGTGGGCCCTC  
TCCATTGAGATAACCGAACCTGGCCCGCCAGCCGGCATCGTCCTACAAAACGTACCT  
GGCCTTCTGATCACACATTGCCGTCTTTACACCCAGAGGATCTATGTCCGACTAGAC  
CCCTGGGACGCCTATCGCAATCACATCCACCTACCCCTCGGTAACTGAAGGCAGG  
CCAAGCGGGACCCAAACCCACGAGACTGTGGAACACACCCGCTCCACAGTGATCCA  
CGTCCTAGAACAGCTGCAGAAGTTCCTTGTCACAGAGGCAGACCTCAGCGGCAAAG  
GAAGACCAAACGGTTCCTAGGAGGTCTAATCGCAGCAGCATCAGCTATCGGGTCC  
CTCTTCTCTATCGGCCTATCTGCCGCAAACCTCAGTTAGCCTTAGCACACTCCAGCGA  
CACGTTACCGAGCTTGATGAAGAGATGCCAGAGGTTACCAAAGCTTAGCTTTCAA  
CAGCAGGAGTTGCAGAGTTTAGGAAAGACAGTACAGGGTACTATAACGACAGTAAA  
CCTCCACTCAGCTCTCCTCAACAACACCTTGCATGCCCTCGAAACCCTGTCAGGGAT  
TGTCAAAGAAGACCTTACCTACGTACGAGTGGTGAGAGACTTGATGCAAGAACTCA  
TCAGAGAAGTCAGCTCATCAATCAACAGCCTCAGTAGTGGTAGAATCCCCACTTACT  
TAGTTAACTTAGATTTGGTCAGAGATATCCTAGGATCCGCCACCACCACAGTGGTGC  
AACCTTCGCAGGTCCATCTAGCCTACAACCTAGGCAGTGCTATTCCCATAGCTGTAG  
ACCCCAAGAACCTGGAAC TAGGCTTTATTCTGAATTTGCCAATCATAGAACTAGGA  
ATATATATAAGTTAAAGTCTGTGTTGAATGTAGGATTTTGGCAAGACAACGCTCACA  
TTCTACTTAAGACACCTCCAGTGCTAGCATAACCATAGTGAAGACCCATCTCTCTACC  
TCGTTCCAAATCTCAACCTCTGCACCAACACCAGGGACATCCATTGGGTCTGCCCAA  
GTAACCCTTTCATCAGGGACACGACCAACTCCCTATGCGGCCTTAGGCCCGACGCCC  
CCGAGCAAAGTGCCAGGGCAGCCTGTCAGACAGGGACAGAGCAGCAGAACCTAG  
GGTGAACGAGCTGGCAACCGATGGCTACTCAGCACACCCGCCACCGAAGCCTTGA  
TTGTCTATGACCACCATGACACAACCACTACGTTGGCCCTACCAAACCAAACCTGT  
TCTTAACGGTACCTCAGGGTGCTACCGTCCATATTGAGGACATCATCCTCCATTACCT  
CAGTTCAGAGAGACATGACACTGAGATTGAGATCATGGACGTGTTCAAGGGTTACA

ATATCACGATTGATGACACCCTTCAGCGGCAACTCATGCTAGAAGGGACCAAATTG  
GTAAAGTTTAGCCTCAGGCAGACGGGGCTGACCACAACCTACGCGGATCAGGTGAC  
TCGCCCCGTAACCTACAGCGAACACCCAATCAGCATGGTCGCGTTGGGACTCCTTCT  
TAGTGGTTGGGTCATTACAGCAATGGTAGCATAACGGAATGTACAAATATATCAAGG  
AATTACAAGCTAGGTTAGATTCTGCCCTGGTAGTGCCAGTACGCTTTCCCCCACAGC  
TTAACGCACCTACATTCAACTTAGCCGCCAGGACCTAA

> Loki-Bsp consensus sequence Env protein

LLQMKLPWAIILNIQWALSIEITEPGPPAGIVLQNVPLGLLITHCRLYTQRIYVRLDPWDA  
YRNHIHLPPRLTEGRPSGTQTHETVEHTRSTVIHVLEQLQKFLVTEADLSGKGRPKRFLG  
GLIAAASAIGSLFSIGLSAANSVSLSTLQRHVTELDEEMPEVHQKLSFQQQELQSLGKTV  
QGTITTVNLHSALLNNTLHALETLSGIVKEDLTYVRVVRDLMQELIREVSSSINSLSSGRI  
PTYLVNLDLVRDILGSATTTVVQPSQVHLAYNLGSAIPIAVDPKNLELGFILNLPPIETRNI  
YKLSVNLVGFWDNAHILLKTPPVLAYHSEDPSLYLVPNLNLCTNTRDIHWVCPSPNF  
IRDTTNSLCGLRPDAPEQKQCQGSLSDRDRAAEPRVERAGNRWLLSTPATEALIVYDHHH  
TTTTLALPNQTLFLVTPQGATVHIEDIILHYLSSERHDTEIEIMDVFKGYNITIDDLQRQL  
MLEGTKLVKFSLRQTGLTTTYADQVTRPVTYSEHPISMVALGLLLSGWVITAMVAYGM  
YKYIKELQARLDSALVVPVRFPPQLNAPTFNLAART\*

>Loki-Aro consensus sequence

TTGGCCTCTGCGACGACAACGAACACAAACGCTTTCGACATGACAAAGAAAACAGG  
AATTACCCTTTCTACTCCAGACTCAATGATCAAAATATGTTCCCTTAACCCGCAGAGG  
CCCTGCACACAGACCCCATGCCATGCTGCAGTTCGACCAGACTTTCAAGGTAGAGGC  
CCTTCTGGACACTGGCGCAGAAATCTCCCTCATGACTTACTCACTCTTTGAAGCATT  
CGAGAAACAAGGGAATGCACAGGTCACACCCTAAGCCTCAGTGAAAGCAACTGGA  
ACTTTACAGCCTATGGCAGTACTAAGCCACAAAACTAAAGGGAGTAATTGAGCTG  
AAACTAATTTTTGAAGGATTGTCCATAACACACCCCCTCTATGTGGCATCACATGAC  
CGTCCCATGCTTTTGATAGGCATGGACCTACTCAACCGCCTCAGGCCTACCATTGAC  
TGTGATAACAACCTACTCTGGGGTCACAAACCAAAGGCTGACCACTATGTTCCCTGGG  
CCCACAAAGGCTATTTGTGCTTGCACACTAGGTTGGGTCTCCTCCGACAACCATGAA  
ACGGGACGTGCACGCACCCCTACCCACCAAACACGTTCCAACCTACCCAGGCTCC  
ACTTGTCCCTAATAGCAAGACCACTCCGACAATACAGGAAAACCTGTATATATTCAG  
GCCAGAGATTAACCCCTCCGTCCTTCCAGACGCAGGATCTGACCTGCCAAAGATGCA  
TCACAATGCACAAATGGAAGAACTCCCTAACCCACCTGCTCGTACCAACCCCTATGC  
CAAAGCTCAAAGCACTGACCACCCTCCCTATGGCCGACCCCACTAATTCCACAGAC  
AAACCACAGATCTCTCAAATAGCGGCTAGCACAAACACTCCTAAAGCCGTTATGC  
AAATAAACGCGAACCAGCCCACCACAAGTGTCTCACCCTAACCCTAATGGTACC  
ACCCCTTCTCCTGAACCACACCCTAACTTGGACCCAAACCTCCTGCAACAAATCCAA  
AAACAAGTGGATACTGCCGACACCTTAAACACAGATGAAGANATGACTCGCCCTGA  
AAACCCTCATGCTCAGCTGTACTCCCAATCTGCGGCAAACTGNACTGCAGCAAAA  
CTGCTCTCCATGAAACCATAATTCCCACATTACCCAATGCTAACCCAGTGTATATCA  
GAAAATATCGTATTCCAATAGCCGCACATGACCCTGTACAGGACACCATTACGGAA  
ATCCTACATGCAGGAATTATCAGGAAATGCAATTCCACATACAACAGCCCTATTTGG  
CCTGTACTCAAACCCCTCTGGGAAACAGAGCCTCACAGTTGACTACAGAAAACCTAAT  
AAACAAGTTCCACTCTCGCGCTGCCTATGGCCTACCTGGATGAAACCCTTGCAAAAG  
TCCAGAATGCCACATACTTACAAGCTNAGACATATCAAATGGCTTCTGTACAATT  
CCAGTCCGTGAACAAGATCAACATAAACTGGCTTTTTTCATTCAACAATGTCCAATAC  
ACTTGGACAGTCACCCCTTTTGGCTATGCAAACCTCCCAGCCGAATTCAACATCTTC

TTCCACAAAGCAATCCCTGACGTCAACTCCAAGAACATCGCCATTTATGTGGATGAC  
ATCCTCATGTGGAGTGACTCTTGGGGGGAACACCAACAGCTGCTCTCCTATGTCCTT  
ACAAGACTCAGTCAAGCAGGCGCCAAAATATCATTGGACAAGGGCCAGTGGTGTAA  
ACGTGCTGTCAATTACCTGGGCTTCCAAGTCGGAGGTGATGGCATCAGACCCCGCAC  
CGAGGCACCCAAAGCAATTCCTGCACCCACTACTCTGAAGCAGCTGTGCAGCTTCTT  
AGGCATTTGCAACTTCTCCCAACATTTTGTGGCGGACTATGCCAAAATTTCCAGCC  
CCTCACACGGCTCCTAAAGAAAGACGTTCCATGGACATGGGGCCACAAACAAGATG  
CACCAATGAAAATACTCAAGGACTCCATCTCCTCGGCACCAGCCTTAGCCTTCCCAG  
ACAAAACCAAGCCTTTCATACTAGAAACCGCCTTCACACCCCTCAACATCACCGCAG  
ACCTCAAACAACAACAGGACCAAAAAACAAGGTTGTCTCTTATGCCAGCAAATCT  
CTCTCCCCAGTAGAACAAAGGTTTACTGACTGTGAAAAGGCCCTGTTTTCAGCCATA  
TGGGCCATCCAGCGATACCGCAACTTAGTCTGTGGAGCACAAATCATCATTGAAACC  
TGTCATCAAATACTCACCTACCTCACATGTGGGAAACTGAGAAAGGGAAAGGTTAC  
CAATGACCGCATAGCTGGTTGGATCCTAGCCACAGAAGGGCTTTCCTTACAGGTCAA  
ATATTCCAAAAGCAAAAACAATGTGCTGGCACATGGCCTTGCCACATTACACGATTG  
TGCATCATCACCGCAACAGACTGGTAAAGAATGCTTCTATACAGACTCACCCACT  
CCTTAACCACAAAAGTTTCTCTGATGCCCTTGTACCACTTTCCTTACAGGTCAA  
GACGGCTCTGCCACCGCAAAACGGGCACACCCGGTGTGGCGTTGGTTTACTCTGG  
ACAAATTGTGATTTGCCTCCACAAAATTCAGCTGGGACCTAAATCCAGCCAGTAT  
GCTGAAGTAGCGGGCACACTAATTGCCCTCNACGCAGCACAAAACAACACTACCATGA  
TCTTGTCAATTTGCACTGACTCAGACTACACGGTACGTAGTTTCTGGACTTTTTGCCA  
AACTGGCTCGCAAACAATATGATTAAGTCTGATGGTAAACTAGTGGCCACACTGA  
ACTGTTACGGCCGTTCAACACCTACTGGACACACACAACCTCACAGTATACTGGAA  
AAAGGTCCCGGGTCATTCCAAACTAGACAGCCCAAACAACACGGCAATGATCAGG  
CTGACACCTTGGTAAAAGAGGGAGTATCTACAGGCCAACCTGGGAATTTGCCCA  
CCAGTCATGCAGTTCCCGCAAACCCCTGCTCAGGTGGACATGGTGACCCCGCAGCCG  
TGCCAAGGCGCCAGACCTCACAGTCCCTTACAGCAGTACCACAGCTACCTGATCACC  
CCAGACACACACAATGACCTGGTACGAGCACAGGAAGAGGATCAGATTCTGATACA  
GTTCAAAAAAATCCTTCAAAACACAGCCTCAGTCGCCGACAGTGGGAACCTCAAAG  
CGGACCCATACTTCCAGATACTCTGGAGAGAAAAGGAAAGGCTGTCCCTGCGCGAC  
GACCTACTGATCTTCAAAGGAACAAATGTGACAGGTGCTGGTGTTTTGGTCTCAAG  
TANGGGCAAGGTCATTTTTAGTTTTTTACAGATTATGAAAGTGTATTATAAGTGG  
ATTATAAGATTTCAAATGATGTGTCATACATTGAAATCTGAAAATAATTGNAGATTG  
CGGACCTTTTCTCCAGCACCCGTCACAAATGATCAACACCATCGCTGGGTAGTTCCA  
CGACAATGGAGAGCCACCATGATCCGACATGCCCATGATGAGCCATGTGGGGGGCA  
CAGGGGAGAACAACCCACTATCCACATGCTATGGCAGGTGGCATACTGGTTCAAAA  
TATGGACTGATGTGAAGGACTATGTGAACGGCTGTACCATTTGTCATAAGTTCCAAC  
CCGTGTTGCCGCGACACAGGGCCCCCTCCAATCAGCCCCAAGCGCGCAACCGTGG  
TCACACATTCAAATTGACTGGATAGGTCCGGTCACTCGCTCTACTTGGGGAAACTAN  
TATGCCCTGACAATAACAGATAGATTCACCAAATGGACCAAGTGCCTGACTGCGCTG  
GCAGACACTGCAGAAACAACAGCCGTCTCCTCATGAAGCACGTCTTCACTCACTGG  
GGCCTGCCACAGAGCGTGGATTCTGATGGAGGCACACACTTCACTGCCACCATCATG  
GAAATCGAGGTGTGGAAAACACTGGGAGTAAAAAGACAATTGCACATAGCGTACCA  
ACCCAGTCATCCGGGCAAGTTGAGCGAGCTAACCAGACGGTCATCAACATGCTAA  
AAAAACAACCTGGATGCAAATCAGAAAGACTGGGACATCAAGCTGCCACTCGTCTT  
ATGACCATANGGGCTATGCCTTCAAAGCTACGCAGGTGTCCCTATTTGAAATGATG

ACTGATCGGCAGATAGTCCTACCCCTCCACCTCCTCTACACTACCCCAGTGGAAGAC  
ATCCATGAAGCAATGCACACAGCCAACCTACCTAGAGGAACTAGGCAGACACCTGCA  
GGACATTTTCAAGTTTTCCAGACAGAACCTGAAAACAGAGGCAACTGGGGTCAAAG  
CCTATTATGACAAAAGGCCTGCGACCGCGAGTATGAAGTGGGGGACAAAATTTTC  
TACTACCACTTCATGATCAAAAACGATCCAAAAGCTTCTTCAGAGTTGGCAAGGAC  
CGTACTTCATAACAGGCAAACCTCTCCCCTGTTGTGTATCGTATCAAAGTTCAGACCC  
CCCGTTCGGACTGCCTTTANAGTGGGTCCACATTAATCAACTCCGACCCTACACCCCA  
TCAGCACTCCAAACAGACACCGAAGAATGATTAAGCTCATGATGACAAGTCTCCCC  
CTTCTGTACACCACAACCCTCCTGCTCGCCCTCACAATTCCCAGCCTTGGTCTCAAAA  
TAACAGAGATTGTCCAACCTGGTCCCAAGACAAGAATCATCCTCAGAGACAACCTCA  
AGCTTCCTGGTAGCCGATGCCAGACTGTTACTCATCAAATCTATGTCTCCCTCGAC  
CCCCTTAATGTAATTTGGACGTACAAGAAAGAACCTCAACATGCCTACCGAGAAGA  
GACAAAGACGTGGTACCTGTATCACCTAGCACATACCCGGGCTGCAGTCAAACCA  
CCCTGAGACAGTTAGAGCGAACGGCTGTATACATGGACACCCCGGACAGACCTCTG  
CGGTCCAAAAGAGCAGTTTTCGGGGTCCTCCTATCCCTCTCCGCTGTTGGCAGCCTC  
TTCTCATCCTCCATGTCTGTAGCTAACACTGTCTCTTACAACGCCTTGAAGAAAAC  
ATGGAACTTTACAATGTGACCTGAAACACATAAACTACTGATACAACAGCAACA  
GTCCGCCCTTGAGGAAATGGGTACCACCCTAGGGGATACCATCCTGCTGCTAACCT  
ACACAACAAGCTCCTCAACTCGACTATCACCCAGTTACAGATCCTGACAAATAGTCT  
TGTGGGAGCAAGTTACATTTATATATGTTTCAGTTTGATAAATAAGCGCAGTCAGTA  
TTTTGTTTAA

> Loki-Aro consensus sequence *pol* gene

TTGGCCTCTGCGACGACAACGAACACAAACGCTTTCGACATGACAAAGAAAACAGG  
AATTACCCTTTCTACTCCAGACTCAATGATCAAAAATATGTTCCCTTAACCCGCAGAGG  
CCCTGCACACAGACCCCATGCCATGCTGCAGTTCGACCAGACTTTCAAGGTAGAGGC  
CCTTCTGGACACTGGCGCAGAAATCTCCCTCATGACTTACTCACTCTTTGAAGCATT  
CGAGAAACAAGGGAATGCACAGGTCACACCCTAAGCCTCAGTGAAAGCAACTGGA  
ACTTTACAGCCTATGGCAGTACTAAGCCACAAAACCTAAAGGGAGTAATTGAGCTG  
AAACTAATTTTTGAAGGATTGTCCATAACACACCCCCTCTATGTGGCATCACATGAC  
CGTCCCATGCTTTTGTAGGCATGGACCTACTCAACCGCCTCAGGCCTACCATTGAC  
TGTGATAACAACCTACTCTGGGGTCACAAACCAAAGGCTGACCACTATGTTCCCTGGG  
CCCACAAAGGCTATTTGTGCTTGCACACTAGGTTGGGTCTCCTCCGACAACCATGAA  
ACGGGACGTGCACGCACCCCTACCCACCAAACACGTTCCAACCTACCCAGGCTCC  
ACTTGTCCCTAATAGCAAGACCACTCCGACAATACAGGAAAACCTGTATATATTCAG  
GCCAGAGATTAACCCCTCCGTCCTTCCAGACGCAGGATCTGACCTGCCAAAGATGCA  
TCACAATGCACAAATGGAAGAACTCCCTAACCCACCTGCTCGTACCAACCCCTATGC  
CAAAGCTCAAAGCACTGACCACCCTCCCTATGGCCGACCCCACTAATTCCACAGAC  
AAACCACAGATCTCTCAAATAGCGGCTAGCACAAACACTCCTAAAGCCGTTATGC  
AAATAAACGCGAACCAGCCCACCACAAGTGTCTCACCCTAACCCTAATGGTACC  
ACCCCTTCTCCTGAACCACACCCTAACTTGGACCCAAACCTCCTGCAACAAATCCAA  
AAACAAGTGGATACTGCCGACACCTTAAACACAGATGAAGANATGACTCGCCCTGA  
AAACCCTCATGCTCAGCTGTACTCCCAATCTGCGGCAAAACTGNACTGCAGCAAAA  
CTGCTCTCCATGAAACCATAATTCCCACATTACCCAATGCTAACCAGTGTATATCA  
GAAAATATCGTATTCCAATAGCCGCACATGACCCTGTACAGGACACCATTACGGAA  
ATCCTACATGCAGGAATTATCAGGAAATGCAATTCCACATACAACAGCCCTATTTGG  
CCTGTACTCAAACCCCTCTGGGAAACAGAGCCTCACAGTTGACTACAGAAAACCTAAT



AAACAAGTTCCACTCTCGCGCTGCCTATGGCCTACCTGGATGAAACCCTTGCAAAAG  
TCCAGAATGCCACATACTTCACAAGCCTNAGACATATCAAATGGCTTCTGTACAATT  
CCAGTCCGTGAACAAGATCAACATAAACTGGCTTTTTTCATTCAACAATGTCCAATAC  
ACTTGGACAGTCACCCCTTTTGGCTATGCAAACCTCCCCAGCCGAATTCAACATCTTC  
TTCCACAAAGCAATCCCTGACGTCAACTCCAAGAACATCGCCATTTATGTGGATGAC  
ATCCTCATGTGGAGTGACTCTTGGGGGGAACACCAACAGCTGCTCTCCTATGTCCTT  
ACAAGACTCAGTCAAGCAGGCGCCAAAATATCATTGGACAAGGGCCAGTGGTGTAA  
ACGTGCTGTCAATTACCTGGGCTTCCAAGTCGGAGGTGATGGCATCAGACCCCGCAC  
CGAGGCACCCAAAGCAATTCCTGCACCCACTACTCTGAAGCAGCTGTGCAGCTTCTT  
AGGCATTTGCAACTTCTCCCAACATTTTGTGGCGGACTATGCCAAAATTTCCAGCC  
CCTCACACGGCTCCTAAAGAAAGACGTTCCATGGACATGGGGCCACAAACAAGATG  
CACCAATGAAAATACTCAAGGACTCCATCTCCTCGGCACCAGCCTTAGCCTTCCCAG  
ACAAAACCAAGCCTTTCATACTAGAAACCGCCTTCACACCCCTCAACATCACCGCAG  
ACCTCAAACAACAACAGGACCAAAAAACAAGGTTGTCTCTTATGCCAGCAAATCT  
CTCTCCCCAGTAGAACAAGGTTTACTGACTGTGAAAAGGCCCTGTTTTTCAGCCATA  
TGGGCCATCCAGCGATACCGCAACTTAGTCTGTGGAGCACAAATCATCATTGAAACC  
TGTCATCAAATACTCACCTACCTCACATGTGGGAAACTGAGAAAGGGAAAGGTTAC  
CAATGACCGCATAGCTGGTTGGATCCTAGCCACAGAAGGGCTTTCCTTACAGGTCAA  
ATATTCCAAAAGCAAAAACAATGTGCTGGCACATGGCCTTGCCACATTACACGATTG  
TGCATCATCACCGCAACAGACTGGTAAAGAATGCTTCTATACAGACTCACCCACACT  
CCTTAACCACAAAAGTTTCTCTGATGCCCTTGTACCCTTTCCCATGGTCTACATG  
GACGGCTCTGCCACCGCAAAACGGGCACACCCGGTGTGGCGTTGGTTTACTCTGG  
ACAAATTGTGATTTGCCTCCACAAAATTCAAGCTGGGACCTAAATCCAGCCAGTAT  
GCTGAACTAGCGGGCACACTAATTGCCCTCNACGCAGCACAAAACAACACTACCATGA  
TCTTGTCAATTTGCACTGACTCAGACTACACGGTACGTAGTTTCCTGGACTTTTTGCCA  
AACTGGCTCGCAAACAATATGATTAAGTCTGATGGTAAACTAGTGGCCCACTGA  
ACTGTTACGGCCGTTCAACACCTACTGGACACACACAACCTCACAGTATACTGGAA  
AAAGGTCCCGGGTCATTCCAAACTAGACAGCCCAAACAACACGGCAATGATCAGG  
CTGACACCTTGGTAAAAGAGGGGAGTATCTACAGGCCAACCTGGGAATTTCTGCCCA  
CCAGTCATGCAGTTCCCGCAAACCCCTGCTCAGGTGGACATGGTGACCCGCAGCCG  
TGCCAAGGCGCCAGACCTCACAGTCCCTTACAGCAGTACCACAGCTACCTGATCACC  
CCAGACACACACAATGACCTGGTACGAGCACAGGAAGAGGATCAGATTCTGATACA  
GTTCAAAAAAATCCTTCAAAACACAGCCTCAGTCGCCGACAGTGGGAACCTCAAAG  
CGGACCCATACTTCCAGATACTCTGGAGAGAAAAGGAAAGGCTGTCCCTGCGCGAC  
GACCTACTGATCTTCAAAGGAACAAATGTGACAGGTGCTGGTGTGTTTTGGTCTCAAG  
TANGGGCAAGGTCATTTTTTCAGTTTTTTTACAGATTATGAAAGTGTATTATAAGTGG  
ATTATAAGATTTCAAATGATGTGTCATACATTGAAATCTGAAAATAATTGNAGATTG  
CGGACCTTTTCTCCAGCACCCGTCACAAATGATCAACACCATCGCTGGGTAGTTCCA  
CGACAATGGAGAGCCACCATGATCCGACATGCCCATGATGAGCCATGTGGGGGGCA  
CAGGGGAGAACAACCCACTATCCACATGCTATGGCAGGTGGCATACTGGTTCAAAA  
TATGGACTGATGTGAAGGACTATGTGAACGGCTGTACCATTTGTCATAAGTTCCAAC  
CCGTGTTGCCGCGACACAGGGCCCCCTCCAATCAGCCCCAAGCGCGCAACCGTGG  
TCACACATTCAAATTGACTGGATAGGTCCGGTCACTCGCTCTACTTGGGGAAACTAN  
TATGCCCTGACAATAACAGATAGATTCACCAAATGGACCAAGTGCCTGACTGCGCTG  
GCAGACACTGCAGAAACAACAGCCGTCCTCCTCATGAAGCACGTCTTCACTCACTGG  
GGCCTGCCACAGAGCGTGGATTCTGATGGAGGCACACACTTCACTGCCACCATCATG

GAAATCGAGGTGTGGAAAACACTGGGAGTAAAAAGACAATTGCACATAGCGTACCA  
ACCCAGTCATCCGGGCAAGTTGAGCGAGCTAACCAGACGGTCATCAACATGCTAA  
AAAAACAACCTGGATGCAAATCAGAAAGACTGGGACATCAAGCTGCCACTCGTCCTT  
ATGACCATANGGGCTATGCCTTCAAAAGCTACGCAGGTGTCCCTATTTGAAATGATG  
ACTGATCGGCAGATAGTCCTACCCCTCCACCTCCTCTACACTACCCAGTGGAAGAC  
ATCCATGAAGCAATGCACACAGCCAACTACCTAGAGGAACTAGGCAGACACCTGCA  
GGACATTTTCAAGTTTTCCAGACAGAACCTGAAAACAGAGGCAACTGGGGTCAAAG  
CCTATTATGACAAAAAGGCCTGCGACCGCGAGTATGAAGTGGGGGACAAAATTTTC  
TACTACCACTTCATGATCAAAAACGATCCAAAAGCTTCTTCAGAGTTGGCAAGGAC  
CGTACTTCATAA

> Loki-Aro consensus sequence Pol protein

LASATTTNTNAFDMTKKTGITLSTPDSMIKICSLTRRGPAHRPHAMLQFDQTFKVEALLD  
TGAEISLMTYSLFEALRETRACTGHTLSLSESNWNFTAYGSTKPQKLKGVIELKLIFEGLS  
ITHPLYVASHDRPMLLIGMDLLNRLRPTIDCDNLLWGHKPKADHYVPGPTKAICACTL  
GWSSDNHETGRARTPTPPNTFQLPQAPLVPNSKTTPTIQENLYIFRPEINPSVLPDAGSD  
LPKMHHNAQMEELPNPPARTNPYAKAQSTDHPPYGRPPLIPQTNHRSLQIAASTNTPKA  
VMQINANQPTTSVSPLTTNGTTPSEPHPNLDPNLLQQIQKQVDTADTLNTDEXMTRPE  
NPHAQLYSQSAAKLXCSKTALHETIIPNLNANPVYIRKYRIPIAAHDPVQDTITEILHAGII  
RKCNSTYNSPIWPVLKPSGKQSLTVDYRKLKQVPLSRCLWPTWMKPLQKSRMPHTSQ  
AXDISNGFCTIPVREQDQHKLAFSNNVQYTWTVTPFGYANSPAEFNIFHKAIPDVNSK  
NIAIYVDDILMWSDSWGEHQQLLSYVLRSLQAGAKISLDKGQWCKRAVNYLGFQVGG  
DGIRPRTEAPKAIPAPTTLKQLCSFLGICNFSQHVFADYAKISQPLTRLLKKDVPWTWGH  
KQDAPMKILKDSISSAPALAFDPDKTKPFILETAFTPLNITADLKQQQDQKNKVVSYASKS  
LSPVEQRFTDCEKALFSAIWAIRYRNLVCGAQIIIETCHQILTYLTCGKLRKKGKVTNDRI  
AGWILATEGLSLQVKYSKSKNNVLAHGLATLHDCASSPQQTGKECFYTDSPDLLNHKSF  
SDAPCTTFPMVYMDGSAHRKTGTPGAGVGLLWTNCDLPPQKFKLGPKSSQY AELAGTL  
IALXAAQN NYHDLVICTDSDYTVRSFLDFLPNWLANNMIKSDGKLV AHTELFTAVQHLL  
DTHNLT VYWKKVPGHSKL DSPNKHGNDQADTLVKEGVSTGQPWEFCPPVMQFPQTPC  
SGGHGDPQPCQGARPSQSLQQYHSYLITPDTHNDLVRAQEEDQILIQFKKILQNTASVAD  
SGNLKADPYFQILWREKERLSLRDDLLIFKGTNVTGAGVLVLKXGQGHFSVFLQIMKVY  
YKWIIRFQMMCHTLKSENNXRLRTFSPAPVTNDQHHRWV VPRQWRATMIRHAHDEPC  
GGHRGEQPTIHMLWQVAYWFKIWTVDVKDYVNGCTICHKFQPVLP RHRAPLQSAPSAPQ  
WSHIQIDWIGPVTRSTWGNXYAL TITDRFTKWKCLTALADTAETTAVLLMKHVFTHW  
GLPQSVDS DGGTHFTATIMEIEVWKT LGVKRQLHIA YQPQSSGQVERANQTVINMLKKQ  
LDANQKDWDIKLPLVLM TIXAMPSKATQVSLFEMMTDRQIVLPLHLLY TTPVEDIHEAM  
HTANYLEELGRHLQDIFKFSRQNLKTEATGVKAYYDKKACDREYEVGDKIFY YHFMIK  
NDPKSFFRVGKDRTS\*

> Loki-Aro consensus sequence *env* gene

ATGATTAAGCTCATGATGACAAGTCTCCCCCTTCTGTACACCACAACCCTCCTGCTC  
GCCCTACAATTCCCAGCCTTGGTCTCAAATAACAGAGATTGTCCAACCTGGTCCC  
AAGACAAGAATCATCCTCAGAGACA ACTCAAGCTTCTGCTAGCCGATGCCAGAC  
TGTTACTCATCAAATCTATGTCTCCCTCGACCCCTTAATGTAATTTGGACGTACAAG  
AAAGAACCTCAACATGCCTACCGAGAAGAGACAAAGACGTGGTACCTGTATCACCT  
AGCACATAACCCGGGCTGCAGTCAAACCACCCTGAGACAGTTAGAGCGAACGGCTG  
TATACATGGACACCCCGGACAGACCTCTGCGGTCCAAAAGAGCAGTTTTTCGGGGTC  
CTCCTATCCCTCTCCGCTGTTGGCAGCCTCTTCTCATCCTCCATGTCTGTAGCTAACA

CTGTCTCTTACAACGCCTTGAAGAAAAACATGGAAACTTTACAATGTGACCTGAAAC  
ACATAAACTACTGATACAACAGCAACAGTCCGCCCTTGAGGAAATGGGTACCACC  
CTAGGGGATACCATCCTGCTGCTCAACCTACACAACAAGCTCCTCAACTCGACTATC  
ACCCAGTTACAGATCCTGACAAATAGTCTTGTGGGAGCAAGTTACATTTATATATGT  
TTCAGTTTGATAAATAAGCGCAGTCAGTATTTTGTTTAA

>Loki-Aro consensus sequence Env protein

MIKLMMTSLPLLYTTTLLLALTIPSLGLKITEIVQPGPKTRIILRDNSSFLVADAQTVTHQI  
YVSLDPLNVIWTYKKEPQHAYREETKTWYLYHLAHTRA AVKTTLRQLERTAVYMDTP  
DRPLRSKRAVFGVLLSLSAVGSLSFSSMSVANTVSYNALKKNMETLQCDLKHKLLIQQ  
QQSALEEMGTTLGDTILLNLHNKLLNSTITQLQILTNSLVGASYIYICFSLINKRSQYFV\*

>Loki-Oja consensus sequence

ATGACTGACGCAGTTTCTTCTGAGGCCTCTAGTCATGGGGACCTGTTTGATGATCTA  
GAAGCTGCTTTGACAGAAATCACTGAAAATCAAATTCAGGTTTTGAAGGTCGAGTT  
CGGAACTTAACCGCACCTGAACTGGAGACTAAGCTTTCTGAGATAGTGGCTGAAATT  
ACTAATGATCCACCGAAGGATAAGGAGTTGACCAAAACACTCGGTAGCCTAGCCAT  
ACTGCTCACAGCTCGACTCAAAGCGCTCACACCCTATTGAATCAAGCACTAGGGA  
AACTTGACACACGCTCGCAGAACTTTCTCAAACCCAGGGAGAAATTAAGCTTTTGC  
AGCATCAGCGCGAGGTTGCCCAAAGACGAACAGATGAGTTGGAGTGTGAGAACGAA  
GAACTAAAACACTGAAAATGATCAACTGAAAAGAGAAATAAAAGATTGTGAATCGCA  
GACCCAGGCCTGTCAGCATGAACTAACCGCAATGCATGTGCAGCTCATTGAAGTTAA  
AGAAACCTACAAAGCCTCTCAAATAGGACTTTACTCAGCTGAAGATGATATAATTA  
GTTGCAGCAAGAGAATGCTAATTTGACCAGACAGTTAGGTGACCAAAAAGAACAAG  
TTGAGCTAATGCGAGAGCAACTGGCCACCTTACCTCAAAGCTTGAGGCCTCTGACC  
AACGGTATGAACGCTTGATGGTGGAAACGAAAGTCTGTGACAACAGACATCAAACCA  
CCCATCGAATCTGACATCAGTCAGCAGTTTTATCCAAGTTTCAGAGACGTAAGGGG  
GGTGCACAGGCTGGAAGGGGTGCGTCTGTTGGATTACCTTTGGTCTCACCTGTACCT  
GCCCCCTTCAGGCTGAAAGGGGTGATTCTGGTGGATCACCTCGGTTGTCACCTGTA  
CCTGCTCCTCTTTCTGCATTGACTTCAAAGCCGACACAGGCAAATCTATTGCATGACT  
TTAGGGCAGAAGCCACTCGTCATCGTGCTCCTTCTGATCGAGATTTAGATAAAATTT  
CTCGAAATCTTACCAAGTTCGAACCAACCCCTGGTGGCTCTAATGATCCTCGAGCAT  
ACCTGGATGACATTGAGTTCTATCTCAGGAAATACTCGGAGGCCACCATTCAAGATA  
AGATTTATCTTATCAAACACTCACTTCGAGCCGTGAGGTAATCCGGTTCATCGAAAGGC  
AGCCAGAGTTTACCAGACGCGAATGGTACTTTTTGCGACAAGCCATTGAGAGGGAA  
TTCTCTGACTACACTATAACAATCAGGTTTAACGGTTGCCATGTCAGTAAAGCAAGGT  
AGGCAGGAGTCTCCACAGCAATACTATTACCGACTTTTGCGAGCATACTTTGGTACT  
CGTAATGAGCCAGGAATGGAGGAGGACTTGAACCTCAAATCTCTTTTCCTTCAGAAC  
CTCCATCCAGGAACCAGTCATCACTTGGGAGTCTTTGCAAACCCCCACACAGCAACA  
ATAAGTCACCTTCGTGAACTTGCTGCGTTGGGTTTCCAGAAGCAGAAACAGGTACAC  
CAAAGTCAGGCGACCCCATTTGTTCTGTCTACCACAGCAGATCAATCAACTTTGGAA  
CTTGAAGGTGCACCAAACCACAAGTTGTATGGACCTGGTTCCGTTGTATCTCATCCA  
CCCAGAGCCAAAGGCGACCCAAACGGGGTTCCGTCAAGGACACCCAAACCAAAGTGA  
GTCACGGAAACATTGGTCTGGGAAGAAAACACAACAGGAGGGGGCGAAAACAGAT  
GACACATCTGGGCCTAGGTCTAGCTGGCATAGAGGGAAACCTCAGCCAAAATGGTT  
TGACAATAACCCCTACCTACGAGAGACACAGGGATCATGGGAGACGACCACAAAACA  
GGTTTGGAGGCCAGTATGCTGGACCCCCACGTGATTTCCATGAGGGAAAAGAACC  
ACAGAAAATTTTTACTTAAAGAAATCTTGGCCCAAATCAGAAAAGGAAAGGGAATT

TTCAGGGTTAAGTAAAGAAGAAATACAGGAAATCAAACGTCTACTAAAAGACTTAG  
CACAGAAGCCTAAGCCAGATAAACCAGATGTGTTGGACCTCTCCCTGAGTCAATCC  
AACTTTGAACTAAATGGTCCGGTCCCAACCTCCGGTGACGGACCCAGACGAGCAC  
AGATCGTCACACTGCCAATCTGGTCCCTGTGACGGCCTCAGAGGGGGGGTGCCTTGC  
ATCCCCACCTATAAGCGATGAGGAAGAAAATGAGACCCTTCAATGCCCCAGTGCTG  
TATTGGTGGTTAGACTGGACCCACAACAACAGTCACTTGAGCAGGGTGACTCCATGT  
TTCCGGTCTACCCCCAGTACAACAATTTCTGTGCGACCTCACAGAGAAGGGACTCG  
CACGAAAATTTTACATGTCTACTAACCTAGAAAGATGTGTTAACACATGAGGCCTTAC  
TTGACACTGCTGCAGACATCACATTGATCTCATCCACCTTGTTTAAACCAGCTGCGCG  
CTGCCGTTAACGATGACAATAAAGACCTGAAACTGCAACCATGCTCTGTAAAGGTGC  
GTCCTTATGCCAACCAACACCATCTTGTCGCGCAGTGTGCTTATCCAACGTCTAT  
TGGTCCAATGACAGTGGTGCATCCAGTCTATGTGTCACCCATCAATTCGATTCCCTTC  
CTCGTGGGTAAGGATCTTCTTAATCGCTTTGAACCTTTGATCGATTTCCAACAGTTGA  
AACTGTGGGCACAAGTTCGACAACCCCTAAGCATTTCTTGGCCGAAGGACGCTTCAT  
CGGCTCACTGCTATGCTGTGAGAACTGAAGAGCTTCACCTCTCAGATGAACAGGACA  
GTTCAACCAGGGAAGCAGAAATGTCAGAGCCAACAGAGAAGAAACCCCTGCACA  
AAACGAACAGGTGATGTTCCAGCATGACACCTTCTTGTGTGCAATTAGCCCGCCAGA  
CTCGGAGGGAGAATACATTCCCCACATCCTTGGTGGCATCCAGATGCTGGGCCACAT  
GGCTAGCGACGCCACCTTGTACCTCTGGGCTGACCAGTCCGCCATCAGTCACGAGTT  
TTATCAAACCTCTGAAAAAAGAAAACCCTGAACTTCCATTTCGAGGAAAATCATGGC  
GTTTTCCAATCCATTCATGCTCGAACTTGACTTTGAAAGCCATAGGCGTGTGCTCACT  
CGCGCTAAAATGGAACCACCAAACTCACACATTCCTTCTTGGTGGTACCAGACCT  
GCCACATACTGCCTGCATAGGCAGTGACCTCCTAGTCCGGCTAGGTGTACAGGTAGA  
CACCATTAACAACGTCTTATGGTCCCCTGTACCGGCTCGAGAACTCCAATGACCCT  
CGACGCACTGAGGTCCGGACAGACCATTCCAGAAGCTTGTGAGGTGGTCACTTCGG  
ACCATGTATCCTTACCTGCTGGTATTCGGGAAGCCATCATCAGAATGCACATTCAAC  
CAGGCCAAAGTCTTGGTCATTCTCAAGCACTCTTCCAGCCGGCCCCTTTGTTTTTCAA  
ACTTGGACTTTCCTTGCCAGCCACACCTCTTTTGAGTCTGAATTCCAGAACCATATCT  
TTGAAGGTGAGTAATGACAACCACAATGAAGAACTCTTGTGCCAAGAGGGACCAC  
GTTGGGCTGGCTCATAAGTACAGATTTCCATGACTTTGAACTAACGGTCCCTGTTCT  
GGGAGGCATTCCCCACTCCCTTCTTGGTGAAGAGGTGTCAGATGTCATCTACACAAA  
ACCTTCCAAGGCTATCGCCATCTACTCTGTCATGGACCTGACATCCGATTCGGTGGG  
ACGTGTGGACTTGTGAGACAAAAATCACTTGGTTTTCCAGACCATGAATGACGTATC  
AATTAACACCATTGATGCACATCCCAACACTGAGACCCAAACTCAGCCTCCACCTTC  
CATCAGTGAACAAATTGATGAGGTTGTGAAATTGGCTGATGCTTTAACTACTGACAA  
TGAACGTCAACAGTTACGTCAGGTTCTGTTAAAGTATCAATCATCGTTGTCCACAGA  
TTCCCTTGATTGTGGATTAACCTTCTATCCACTCAGTGCGCATCCCAACACCAGAAAA  
CGCACCGCCTACCTTTGTTAGACAATAACAAGATTCCTCTTGCATCGTATGAACCGGT  
TCAGGAGATCATTGATGATCTGACCAACAAAGGGATCATTAGGCCCTGTAATAGCA  
CCTACTCAGCCCAATTTGGCCTGTACGTAAGCCAAATGGCAAATGGAGATTGACTA  
TCGACTACAGACGGTTGAACCAGCAGGTTCCCCTATCTAGATGGCCAATGACGCAG  
CTGGAACAGGAACTACCCAGGGTCAAAGAAGCTAAATACTTCTCTACCCTGGATGT  
AGCCTCAGGATTTTGGACAATCCCTGTCCATCCTGACGACCAGCACAAGCTAGCATT  
CACCTTTGCGAGGCAACAATACTTTTACCCGCTGTCCGTTTGGATATGCAAATTCT  
CCAGCAGAGTTTAAACATCTTTCTGAACAAAGCATGTCCCGATGCCACACAACGTGGT  
ACACTTATTTACGTAGATGACATTCTCATTCGTAATGCAACATTGGAAGATCACATT

GAAGAGATTGAACATGTACTTAAACAACCTCACCTCTGCTGGAGCCAAAATTTCTCTC  
TCTAAATGTCAGTGGTGTCTGAACCAAAGTCAACTATGTGGGCCTCCTGGTGGGACCC  
ACCGGAGTCCAACCACAAGTTGGCAGAGTTC AAGGTCTCAAGGACATTGCAGCTCC  
AACAAACCTCAAAGAATTAAGAAGCTTTCTAGGAGTATGCAATTA CTACGCCAGTT  
TATTGAGGACTATGCTGACATAGCTAAACCGCTCACTGAACTACTAAAAAAGGATGT  
GCCCTTCAGGTGGGCTCAACCACAACAACAAGCCATGGAAACTCTGATAACCAAAC  
TGAGTTCAGCCCCATGCTTGGCCTACCCTAACTGTGAAAAAGAATTCCACCTTGAAG  
TTGGATTCTCCAATAACTGTTTGGAGCGCTGGGTTGTATCAAATATATGACCAAGATA  
AACGCGTTGTTGCTTATGCTAGTAAGACACTCGCTACACCTGAACTGAAGTACTCGG  
ACTGTGAAAAAGCGTTGCTTGCCACTGTTTGGGCTGTGAAGCATTCTCTAACTATG  
TTGGAGGACAAAAGGTAATTGTTGAAACCCAACATCAGCCGGTCACATTCCTGAAC  
AGTCAGCGAATCAGAGACGGTGTGGTCACAAACGCACGTGTAGCTTCATGGCTAAT  
GGCACTGCAGAGCTTTGACCTCGAAATCAGGTACGCACAAAACAAAAGAATGCTT  
TGGGTACTGACCTAGCTGCATGCCAGCGTTGTGTTGACGACGCTCCAACAGAAATCA  
GAGTACAAAGTTCAGGGATCATCACTGATCCACACCACCCTACTTTGATCAAATA  
TCTGCCAAGATATGGTTACTGCATACGTGGATGGGTGTTCTTTCCGCAAGGATAAAG  
AACTCCTGGCTGGTGTGGGTATTGCATGGCTTCACGACGACCCCTGTGAACCCAAGA  
GTTTCCATCTTGGGTCTCAAACCTCACAATACGCAGAAATTGCTGCAGTTTTAATTGT  
TTTACAACCTTGCACTTTCTTTGAACATCCATACACTTGTGATCTGTACCGACTCAAAC  
TACGCACGACTGAGTTTTTTCATGTCATCTGGACCTCTGGAAACAGAACAATTTCCAG  
ACGTCCAACAGAAAACCAGTGAAAAACAAAGAGCTTTTTGTGGCATGCGATCACTT  
GATCACCTCTCACAACATCCAAATCTACTGGAAAAAGGTGAGAGGACATTCTCGAA  
TCCCTGGTCAGGACAAAGTGATGAATGACTTGAGTGACTCAATGGCAAACAGGGT  
GCATTGACGGGCGAACACTGGGACTTCGCTGAAACATGTCGGCTTTTTCCCCACCCA  
CCCGCCCTGAAGCTCAGATTTGCGCGGTCACCAGATCCACACCCTTGGCCTCCGTC  
TCGGCCAAACCCATTTATTCTGACGATGACCTCATCAAACCTGCAGGCAGACGATCCT  
GCCATTGCCAAGGTCCTGGATTTTCTGGTGCATCCGACCAACAACGCCCCCTCGTCT  
GGTGACTTTGAAACGATTCCAGA ACTTCGGGCTCTTTATGCCCTTCATTCTTCCTTGA  
AGGTGGTCAAGGGCATTCTTCTTCGTGTTTCCGGTGACCACGCTCCGCCGGCTCTCGT  
GGTCCCTCGTAACCAAAGGGGGGTGATGTTGATGTATGCCCATGACCTCCCCTCTTC  
AGGTCACAAAGGCATCAACGCAACATACTCTGCACTTAAACAGATCGCATTTTGGCC  
ACACATGAAGAAAGATGTGACAGATTATGTCAATGGCTGCTTGGTTTGCTGTGAGTT  
CCAACCAACTAACCCAACACACAGAGCACCCTGCAAAAAGAAAGGTATTTCAATTC  
CATGGTCAGACATCCAGATCGACTGGGTGGGCCCCTTGACAAAGTCATCCAGAGGA  
AATAAATACTTCCTGACAGTGACATGTGCCTTCACAAAATGGGTGGAGTGTCTACCA  
GCTCCAAATGACACTGCTCAAATGACCGCTCTGTTGCTTATGAACCACGTGTTCTCA  
CGTTTTGGTTTACCAATGCGAGTGAATTCGGATCGTGGTACTCACTTCACAGCCGAA  
GTGATGCAACAGGTCTGGAACACTCTGGGGGTAAAAGCGAACTTTCACGTGAGCCA  
CCACCCTCAATCCTCAGGGCAGGTGGAACGAGCAAACAGAACTGTAGTAAACATAC  
TGAAAAAGTATGTAGCGGCCAGTCACAAAGACTGGGACATCAAACCTACCTCTGGTA  
ATGATGGCCATCAGGGCCACCCTCATGAATCCACTGGTACATCACCTTTCGAGATG  
ATGACGGGGAGACAAATGACTTTGCCTCTACACCTTCTTTACCAGCCAGGAGAGGCT  
AGTGTAGCAACAGCCTACACGGCGCATCAATACGTGGCTGACCTGCATGAACACTT  
GAAGGCTACATTTGCTTTTTCGCAAAAAGCATATGGAGAAAGCAGCTGAGGGTTCGTA  
AACTTATTACGACCAGAAAGCGTCGCACCAAACGCTTGAGGTAGGAGACAAAGTC  
TGGTACTACCTTTTTGTCCAGCCAACGGGACAGGCCAACCAGAAGGTTGGCAAACCTG

GCCCGCAAACCTTCTTCCACGCTGGACAGGCCACATGTCATCACTGACAAGCTGTCCG  
CCAGTGGTATAACCAGATCAAATCAGCCAAGGCCGAAAGGAGCCCATTTTGAAATG  
GGTCCATCGCAACCAGCTCAAACCTGCACAAACACCCTGTGGGACTTGTTGGGTTCAA  
CCAAACCCAATCAAATTAACCACAGAGATTCCTTATTGTGGTGGTGTACCAGTTCA  
TCCATAACTGAGCACCCACCCCTCCAATAAGTGAAAGTAAGATTGTACAAATTGTG  
AGCTCAAACAATAGCACGTCAATAGTACAAATCTTGCTCCACTGGAATCGTTGTTT  
GTAAAACCTATTTGGCTTTGATCTCTTGGTGTGTTTTCTCTAAGATCCATAGTGTTACT  
AGTTACTGGCTGACCAATCGAGTTACGTTGTGTTTCTTAACCACAAAGGGTAAGTTT  
GCTAATACCAATCTACGTTGCCTCTCTGTCTTATCAGGAAGATGATACTGCTGGTGA  
TCGCAGTGCTCCTCCTTGTCTCAAGCCAGGCACGTTTGGAGATTGTTGAACCGGGAC  
CGGAGTCAGGAATTGTGCTGAAGGAACACCCCGGACTGTTAATCACGAACTGTCCG  
TGGCACACCCAAAAGATCTTTGTGAGGGCTCCGTCTGATGCAGTTTACAGAAAACAT  
GTGCAGGCGACATCCAGCTTTCTCTCTTGGGCTGCTGTTACCTGGACAATGGATGTA  
ATTTACATGCTGAGAATGATATCGTTCACATGCTAACTCAGATGCAAAAATTCACG  
ATCACCCAGTCTGAGCTAAGTGGCGTTGGACACCGTGATAAACGTTTTATCGCTGGG  
CTACTTACCGCTGCCTCAGCTATTGGTTCACTGTTTAGTCTGGGGGTTTTCCGCTGTAA  
ATGCAGTCACCCTAGCCACCCTCAAGCGTCACATGAATGAGCTACGTGATGAGATTC  
CCCAAATCCGGGGTCAGCTAGATATCCAACAATCACAGGTACAGACTATGGGAAAA  
ACTCTACAGGACACTGTGCTAATCGTGAACACCCACAGCGAGACTCTTAAAACTTA  
ACCAGGGCAGTAAACAAGTTGTTAAGCGTAGTTAGTATAGACTATGCACACATACA  
ACTGGTAACCATGCTACTGGCTGACATGACTCGAGACATCGGGTCATCCATTGATTC  
GCTAGTCCCTCGGTAGAATACCCCTTATCTAGTGTCACTAGAGTTGGTCCAACAAC  
CTTATCTGAAGCAACCAGAGAACAGATAACCCCTACAGGCCCATCTGGCCTACA  
CCTTGGGAAGTTCAATTCCCATCCATGTGGATCCGACGGCCAGGGAGCTAGCTTTCT  
TGATCCACATCCCATCGTCTCTCCAGAAAACATTTACAGACTCAAAGACGTCATAA  
ATGTAGGGATCTGGCAAGGTGACGTTTATGTGAGGATGCACACACCCAAGGTCATC  
GCGTACCATGACAGCGATCCAGAGTTGTACCTAGCGCCAAACTTACAGTTGTGTACG  
CCCACTAGAGATATTCACTACCTGTGCCCAAGCAAACCGTTCGTGCGAGATAGCACT  
GGTGGTCTGTGTGGACTTAAGCCAATCCACACAGATACTCGCTGCCCCACTACCATT  
ACCCCTCGCAGGCAAATGACCACCACGCAGGCGGAGATCGTTGGAAATCGGTGGTT  
GGTCTGACACCAGTAAACAACCGCGACCATCATGTATGATCAACATGACACCTCAAC  
CCGAATGGAACCTACCATGGAGTTCCATCTGGGTTGACGTCCCTAACGATGCTATGGT  
ACACGTGGACAACCTAGCCCTCTATCACCTTACCCAGATCAATATCAAGGTGAAGT  
AGAGATTTGACTTTCTTTAGCCAACATACGATCGAACTCAACTCTCGCACAGTGGA  
GCAAGTCGACTACGAAGGGTCGCGTGTAATTGATGTAGGCCCATTAATAAGGTCCCT  
CAAAGAAATGGAAGCACGTCAGAACCCTAATATTCAATCCCTTACTTACGCTTGGTC  
CACCGCAGATACTGTATTAGTAACTCTGGTAGGACTCGGATACCTTCTCACTTTTGG  
AACCACCTATCTTTATGTTAAGAAAACCCAACATCTTTGTAGTCAGATAGACAGGTG  
TCGCAGTCGATTGGCTCGAGGGACTCGACGGAGATTTGCTGAAAGAGAGAACCATG  
CTAACGACAGGACAGAGGGGTCCTCGAGATGAATCTTAGAACAGAACCTCTCTCT  
CCAACCATTCTCGACCTGGGCGATACTCTGTGA

> Loki-Oja consensus sequence *smc-gag-pol* gene

ATGACTGACGCAGTTTCTTCTGAGGCCTCTAGTCATGGGGACCTGTTTGATGATCTA  
GAAGCTGCTTTGACAGAAATCACTGAAAATCAAATTCAGGTTTTGAAGGTCGAGTT  
CGGAACTTAACCGCACCTGAACTGGAGACTAAGCTTTCTGAGATAGTGGCTGAAATT  
ACTAATGATCCACCGAAGGATAAGGAGTTGACCAAAACACTCGGTAGCCTAGCCAT

ACTGCTCACAGCTCGACTCAAAAGCGCTCACACCCTATTGAATCAAGCACTAGGGA  
AACTTGACACACGCTCGCAGAACTTTCTCAAACCCAGGGAGAAATTAAGCTTTTGC  
AGCATCAGCGCGAGGTTGCCCAAAGACGAACAGATGAGTTGGAGTGTGAGAACGAA  
GAACTAAAAACTGAAAATGATCAACTGAAAAGAGAAATAAAAAGATTGTGAATCGCA  
GACCCAGGCCTGTCAGCATGAACTAACCGCAATGCATGTGCAGCTCATTGAAGTTAA  
AGAAACCTACAAAGCCTCTCAAATAGGACTTTACTCAGCTGAAGATGATATAATTA  
GTTGCAGCAAGAGAATGCTAATTTGACCAGACAGTTAGGTGACCAAAAAGAACAAG  
TTGAGCTAATGCGAGAGCAACTGGCCACCTTACCTCAAAGCTTGAGGCCTCTGACC  
AACGGTATGAACGCTTGATGGTGGAAACGAAAGTCTGTGACAACAGACATCAAACCA  
CCCATCGAATCTGACATCAGTCAGCAGTTTTATCCAAGTTTCAGAGACGTAAAGGGG  
GGTGCACAGGCTGGAAGGGGTGCGTCTGTTGGATTACCTTTGGTCTCACCTGTACCT  
GCCCCCTTCAGGCTGAAAGGGGTGATTCTGGTGGATCACCTCGGTTGTCACCTGTA  
CCTGCTCCTCTTTCTGCATTGACTTCAAAGCCGACACAGGCAAATCTATTGCATGACT  
TTAGGGCAGAAGCCACTCGTCATCGTGCTCCTTCTGATCGAGATTTAGATAAAAATTT  
CTCGAAATCTTACCAAGTTCGAACCAACCCCTGGTGGCTCTAATGATCCTCGAGCAT  
ACCTGGATGACATTGAGTTCTATCTCAGGAAATACTCGGAGGCCACCATTCAAGATA  
AGATTTATCTTATCAAACCTCACTTCGAGCCGTGAGGTAATCCGGTTCATCGAAAGGC  
AGCCAGAGTTTACCAGACGCGAATGGTACTTTTTGCGACAAGCCATTGAGAGGGAA  
TTCTCTGACTACACTATAACAATCAGGTTTAACGGTTGCCATGTCAGTAAAGCAAGGT  
AGGCAGGAGTCTCCACAGCAATACTATTACCGACTTTTGCAGCATACTTTGGTACT  
CGTAATGAGCCAGGAATGGAGGAGGACTTGAACCTCAAATCTCTTTTCCTCAGAAC  
CTCCATCCAGGAACCAGTCATCACTTGGGAGTCTTTGCAAACCCCCACACAGCAACA  
ATAAGTCACCTTCGTGAACTTGCTGCGTTGGGTTTCCAGAAGCAGAAACAGGTACAC  
CAAAAGTCAGGCGACCCCATTTGTTCTGTCTACCACAGCAGATCAATCAACTTTGGAA  
CTTGAAGGTGCACCAAACCACAAGTTGTATGGACCTGGTTCCGTTGTATCTCATCCA  
CCAGAGCCAAAGGCGACCCAAACGGGGTTCCGTCAAGGACACCCAACCAAAGTGA  
GTCACGGAAACATTGGTCTGGGAAGAAAACACAACAGGAGGGGGCGAAAACCAGAT  
GACACATCTGGGCCTAGGTCTAGCTGGCATAAGAGGGAAACCTCAGCCAAAATGGTT  
TGACAATACCCCTACCTACGAGAGACACAGGGATCATGGGAGACGACCACAAAACA  
GGTTTGGAGGCCAGTATGCTGGACCCCCACGTGATTTCCATGAGGGAAAAGAACC  
ACAGAAAATTTTTACTTAAAGAAATCTTGGCCCAAATCAGAAAAGGAAAGGGAATT  
TTCAGGGTTAAGTAAAGAAGAAATACAGGAAATCAAACGTCTACTAAAAGACTTAG  
CACAGAAGCCTAAGCCAGATAAACCAGATGTGTTGGACCTCTCCCTGAGTCAATCC  
AACTTTGAACTAAATGGTCCGGTCCCAACCTCCGGTGACGGACCCACAGACGAGCAC  
AGATCGTCACACTGCCAATCTGGTCCCTGTGACGGCCTCAGAGGGGGGGTGCCTTGC  
ATCCCCACCTATAAGCGATGAGGAAGAAAATGAGACCCTTCAATGCCCCAGTGCTG  
TATTGGTGGTTAGACTGGACCCACAACAACAGTCACTTGAACAGGGTGACTCCATGT  
TTCCGGTCTACCCCCAGTACAACAATTTCTGTGCGACCTCACAGAGAAGGGACTCG  
CACGAAAATTTTACATGTCATAACCCTAGAAGATGTGTTAACACATGAGGCCTTAC  
TTGACACTGCTGCAGACATCACATTGATCTCATCCACCTTGTTTAAACCAGCTGCGCG  
CTGCCGTTAACGATGACAATAAAGACCTGAAACTGCAACCATGCTCTGTAAAGGTGC  
GTCCTTATGCCAACCAACACCATCTTGTCCGCAGTGTGCTTATCCAACCTGTCTAT  
TGGTCCAATGACAGTGGTGCATCCAGTCTATGTGTCACCCATCAATTCGATTCCTTTC  
CTCGTGGGTAAGGATCTTCTTAATCGCTTTGAACCTTTGATCGATTTCCAACAGTTGA  
AACTGTGGGCACAAGTTCGACAACCCCTAAGCATTTCTTGGCCGAAGGACGCTTCAT  
CGGCTCACTGCTATGCTGTGAGAAGTGAAGAGCTTACCTCTCAGATGAACAGGACA

GTTCAACCAGGGAAGCAGAAATGTCAGAGCCAACAGAGAAGAAAACCCCCTGCACA  
AAACGAACAGGTGATGTTCCAGCATGACACCTTCTTGTGTGCAATTAGCCCGCCAGA  
CTCGGAGGGAGAATACATTCCCCACATCCTTGGTGGCATCCAGATGCTGGGCCACAT  
GGCTAGCGACGCCACCTTGTACCTCTGGGCTGACCAGTCCGCCATCAGTCACGAGTT  
TTATCAAACCTCTGAAAAAGAAAACCCCTGAACTTCCATTTCGCAGGAAAATCATGGC  
GTTTTCCAATCCATTCATGCTCGAACTTGACTTTGAAAGCCATAGGCGTGTGCTCACT  
CGCGCTAAAATGGAACCACCAAACTCACACATTCCTTCTTGGTGGTACCAGACCT  
GCCACATACTGCCTGCATAGGCAGTGACCTCCTAGTCCGGCTAGGTGTACAGGTAGA  
CACCATTAACAACGTCTTATGGTCCCCTGTACCGGCTCGAGAACTCCAATGACCCT  
CGACGCACTGAGGTCCGGACAGACCATTCCAGAAGCTTGTGAGGTGGTCACTTCGG  
ACCATGTATCCTTACCTGCTGGTATTCGGGAAGCCATCATCAGAATGCACATTCAAC  
CAGGCCAAAGTCTTGGTCATTCTCAAGCACTCTTCCAGCCGGCCCCCTTGTTTTTCAA  
ACTTGGACTTTCCTTGCCAGCCACACCTCTTTTGAGTCTGAATTCCAGAACCATATCT  
TTGAAGGTGAGTAATGACAACCACAATGAAGAACTCTTGTGCCAAGAGGGACCAC  
GTTGGGCTGGCTCATAAGTACAGATTTCCATGACTTTGAACTAACGGTCCCTGTTCT  
GGGAGGCATTCCCCACTCCCTTCTTGGTGAAGAGGTGTCAGATGTCATCTACACAAA  
ACCTTCCAAGGCTATCGCCATCTACTCTGTCATGGACCTGACATCCGATTCGGTGGG  
ACGTGTGGACTTGTGAGACAAAAATCACTTGGTTTTCCAGACCATGAATGACGTATC  
AATTAACACCATTGATGCACATCCCAACACTGAGACCCAACTCAGCCTCCACCTTC  
CATCAGTGAACAAATTGATGAGGTTGTGAAATTGGCTGATGCTTTAACTACTGACAA  
TGAACGTCAACAGTTACGTCAGGTTCTGTTAAAGTATCAATCATCGTTGTCCACAGA  
TTCCCTTGATTGTGGATTA ACTTCTATCCACTCAGTGCGCATCCCAACACCAGAAAA  
CGCACCGCTACCTTTGTTAGACAATACAAGATTCTCTTGCATCGTATGAACCGGT  
TCAGGAGATCATTGATGATCTGACCAACAAAGGGATCATTAGGCCCTGTAATAGCA  
CCTACTCAGCCCAATTTGGCCTGTACGTAAGCCAAATGGCAAATGGAGATTGACTA  
TCGACTACAGACGGTTGAACCAGCAGGTTCCCCTATCTAGATGGCCAATGACGCAG  
CTGGAACAGGAACTACCAGGGTCAAAGAAGCTAAATACTTCTCTACCCTGGATGT  
AGCCTCAGGATTTTGGACAATCCCTGTCCATCCTGACGACCAGCACAAAGCTAGCATT  
CACCTTTGCGAGGCAACAATACACTTTTACCCGCTGTCCGTTTGGATATGCAAATTCT  
CCAGCAGAGTTTAAACATCTTTCTGAACAAAGCATGTCCCGATGCCACACAACGTGGT  
ACACTTATTTACGTAGATGACATTCTCATTTCGTAATGCAACATTGGAAGATCACATT  
GAAGAGATTGAACATGTA CTTAAACA ACTCACCTCTGCTGGAGCCAAAATTTCTCTC  
TCTAAATGTCAGTGGTGTGCAACCAAAGTCAACTATGTGGGCCCTCCTGGTGGGACCC  
ACCGGAGTCCAACCACAAGTTGGCAGAGTTCAAGGTCTCAAGGACATTGCAGCTCC  
AACAAACCTCAAAGAATTAAGAAGCTTTCTAGGAGTATGCAATTA CTACGCCAGTT  
TATTGAGGACTATGCTGACATAGCTAAACCGCTCACTGAACTACTAAAAAAGGATGT  
GCCCTTCAGGTGGGCTCAACCACAACAAGCCATGGAACTCTGATAACCAAAC  
TGAGTTCAGCCCCATGCTTGGCCTACCCTAACTGTGAAAAAGAATTCCACCTTGAAG  
TTGGATTCTCCAATAACTGTTTGGAGCGCTGGGTTGTATCAAATATATGACCAAGATA  
AACGCGTTGTTGCTTATGCTAGTAAGACACTCGCTACACCTGAACTGAAGTACTCGG  
ACTGTGAAAAAGCGTTGCTTGGCACTGTTTGGGCTGTGAAGCATTCTCTAACTATG  
TTGGAGGACAAAAGGTAATTGTTGAAACCCAACATCAGCCGGTCCACATTCCCTGAAC  
AGTCAGCGAATCAGAGACGGTGTGGTCACAAACGCACGTGTAGCTTCATGGCTAAT  
GGCACTGCAGAGCTTTGACCTCGAAATCAGGTACGCACAAAACAAAAGAATGCTT  
TGGGTA CTGACCTAGCTGCATGCCAGCGTTGTGTTGACGACGCTCCAACAGAAATCA  
GAGTACAAAGTTCAGGGATCATCACTGATCCACACCACCTACTTTGATCAAATA



TCTGCCAAGATATGGTTACTGCATACGTGGATGGGTGTTCTTTCCGCAAGGATAAAG  
AACTCCTGGCTGGTGTGGGTATTGCATGGCTTCACGACGACCCCTGTGAACCCAAGA  
GTTTCCATCTTGGGTCTCAAACCTCACAATACGCAGAAATTGCTGCAGTTTTAATTGT  
TTTACAACCTTGCAAGTTTCTTTGAACATCCATACTTGTGATCTGTACCGACTCAAAC  
TACGCACGACTGAGTTTTTCATGTCATCTGGACCTCTGGAAACAGAACAATTTCCAG  
ACGTCCAACAGAAAACCAGTGAAAAACAAAGAGCTTTTTGTGGCATGCGATCACTT  
GATCACCTCTCACAACATCCAAATCTACTGGAAAAAGGTGAGAGGACATTCTCGAA  
TCCCTGGTCAGGACAAAGTGATGAATGACTTGAGTGACTCAATGGCAAAACAGGGT  
GCATTGACGGGCGAACACTGGGACTTCGCTGAAACATGTCGGCTTTTTCCCCACCCA  
CCCGCCCCTGAAGCTCAGATTTGCGCGGTCACCAGATCCACACCCTTGGCCTCCGTC  
TCGGCCAAACCCATTTATTCTGACGATGACCTCATCAAACACTGCAGGCAGACGATCCT  
GCCATTGCCAAGGTCCTGGATTTTCTGGTTCGATCCGACCAACAACGCCCCCTCGTCT  
GGTGACTTTGAAACGATTCCAGAACTTCGGGCTCTTATGCCCTTCATTCTTCCTTGA  
AGGTGGTCAAGGGCATTCTTCTTCGTGTTTCCGGTGACCACGCTCCGCCGGCTCTCGT  
GGTCCCTCGTAACCAAAGGGGGGTGATGTTGATGTATGCCCATGACCTCCCCTCTTC  
AGGTCACAAAGGCATCAACGCAACATACTCTGCACTTAAACAGATCGCATTTTGGCC  
ACACATGAAGAAAGATGTGACAGATTATGTCAATGGCTGCTTGGTTTGTCTGTCAGTT  
CCAACCAACTAACCCAACACACAGAGCACCCTGCAAAAGAAAGGTATTTCAATTC  
CATGGTCAGACATCCAGATCGACTGGGTGGGCCCCTTGACAAAGTCATCCAGAGGA  
AATAAATACTTCTGACAGTGACATGTGCCTTACAAAATGGGTGGAGTGTCTACCA  
GCTCCAAATGACACTGCTCAAATGACCGCTCTGTTGCTTATGAACCACGTGTTCTCA  
CGTTTTGGTTTACCAATGCGAGTGAATTCGGATCGTGGTACTCACTTCACAGCCGAA  
GTGATGCAACAGGTCTGGAACACTCTGGGGGTAAAAGCGAACTTTCACGTGAGCCA  
CCACCCTCAATCCTCAGGGCAGGTGGAACGAGCAAACAGAAGTGTAGTAAACATAC  
TGAAAAGTATGTAGCGGCCAGTCACAAAGACTGGGACATCAAACACTACCTCTGGTA  
ATGATGGCCATCAGGGCCACCCTCATGAATCCACTGGTACATCACCTTTCGAGATG  
ATGACGGGGAGACAAATGACTTTGCCTCTACACCTTCTTTACCAGCCAGGAGAGGCT  
AGTGTAGCAACAGCCTACACGGCGCATCAATACGTGGCTGACCTGCATGAACACTT  
GAAGGCTACATTTGCTTTTTCGCGAAAAGCATATGGAGAAAGCAGCTGAGGGTTCGTA  
AACTTATTACGACCAGAAAGCGTCGCACCAAACGCTTGAGGTAGGAGACAAAGTC  
TGGTACTACCTTTTTGTCCAGCCAACGGGACAGGCCAACCAGAAGGTTGGCAAACCTG  
GCCCAGAACTTCTTCCACGCTGGACAGGCCACATGTCATCACTGACAAGCTGTCCG  
CCAGTGGTATAACCAGATCAAATCAGCCAAGGCCGAAAGGAGCCATTTTGAATG  
GGTCCATCGCAACCAGCTCAAACACTGCACAAACACCCTGTGGGACTTGTGGGTTCAA  
CCAAACCCAATCAAATTA

> Loki-Oja consensus sequence Smc-Gag-Pol polyprotein

MTDAVSSEASSHGDLFDDLEAALTEITENQIPGFEGVRNLTAPELETKLSEIVAEITNDP  
PKDKELTKTLGSLAILLTARLKSHTLLNQALGKLDTRSQKLSQTQGEIKLLQHOREVA  
QRRTDELECQNEELKTENDQLKREIKDCESQTQACQHELTAMHVQLIEVKETYKASQIG  
LYSAEDDIIKLQENANLTRQLGDQKEQVELMREQLAHLTSKLEASDQRYERLMVERK  
SVTTDIKPIESDISQQFYPSFRDVKGGAQAGRGASVGLPLVSPVPAPLQAERGDSGGSPR  
LSPVPAPLSALTSKPTQANLLHDFRAEATRHRAPSDRDLKISRNLTKFEPTPGGSNDPR  
AYLDDIEFYLRKYSEATIQDKIYLIKLTSSREVIRFIERQPEFTRREWYFLRQAIEREFSDYT  
IQSGLTVAMSVKQGRQESPQQYYRLLRAYFGTRNEPGMEEDLNFKSLFLQNLHPGTSH  
HLGVFANPHTATISHLRELAALGFQKQKQVHQKSGDPVLSSTADQSTLELEGAPNHKL  
YGPGSVVSHPPRAKGDPNGVPSRTPNQSESRRKHWSGKKTQQEGRKPDSTSGPRSSWHR

GKPQPKWFDNTPTYERHRDHGRRPQNRFGGQYAGPPRDFHEGKEPTENFYLKKS WPKS  
EKEREFSGLSKEEIQEIKRLLKDLA QKPKPDKPDVLDLSLSQSNFELNGPVPTS GDGPQTS  
TDRHTANLVPVTASEGGCLASPPISDEEENETLQCPSAVLVVRLDPQQQSLEQGDSMFPV  
YPPVQQFLCDL TEKGLARKFYMSLTLEDVLTHEALLDTAADITLISSTLFNQLRAAVNDD  
NKDLKLQPCSVKVRPYANTNTILSAVSLIQLSIGPMTVVHPVYVSPINSIPFLV GKDLLNR  
FEPLIDFQQLKLWAQVRQPLSISWPKDASSAHCYAVRTEELHLSDEQDSSTREAEMSEPT  
EKKPPAQNEQVMFQHDTFLCAISPPDSEGEYIPHILGGIQMLGHMASDATLYLWADQSA  
ISHEFYQTLKKENPEL PFAGKSWRFPIHSCSNLTLKAIGVCSLALKWNHQTLTHSFLVVP  
DLPHTACIGSDLLVRLGVQVDTINNVLWSPVPARETPMTLDALRSGQTIPEACQVVTSD  
HVSLPAGIREAIIRMHIQPGQSLGHSQALFQPAPLFFKLGLSLPATPLLSLNSRTISLKVSN  
DNHNEETLVPRGTTLGWLISTDFHDFELTPVVLGGIPHSLLGEEVSDVIYTKPSKAIAYS  
VMDLTSDSVGRVDLSDKNHLVFQTMNDVSINTIDAHNPNTETQTQPPPSISEQIDEVVKLA  
DALTTDNERQQLRQVLLKYQSSLSTDSLDCGLTSIHSVRIPTPENAPPTFVRQYKIPLASY  
EPVQEIIDDLTNKGIIRPCNSTYSAPIWPVRKPNGKWRLTIDYRRLNQQVPLSRWPMTQL  
EQELPRVKEAKYFSTLDVASGFWTIPVHPDDQHKLAFTFARQQYTFTRCPFGYANSPAE  
FNIFLNKACPDATQRGTLIYVDDILIRNATLEDHIEEIEHVLKQLTSAGAKISLSKQWCR  
TKVNYVGLLVGPTGVQPQVGRVQGLKDIAAPTNLKELRSFLGVCNYSRQFIEDYADIAK  
PLTELLKKDVPFRWAQPQQQAMETLITKLSSAPCLAYPNCEKEFHLEVGFSSNNCLSAGL  
YQIYDQDKRVVAYASKTLATPELKYS DCEKALLATVWAVKHFSNYVGGQKVIVETQH  
QPVTFLNSQRIRDGVVTNARVASWLMALQSFDLEIRYAQNKKNALGTDLAACQRCVD  
DAPTEIRVQSSGIITDPHHHYFDQNICQDMVTAYVDGCSFRKDKELLAGVGI AWLHDDP  
CEPKSFHLGSQTSQYAEIAAVLIVLQLAVSLNIHTLVICTDSNYARLSFSCHLDLWKQNN  
FQTSNRKPVKNKELFVACDHLITSHNIQIYWKKVRGHSRIPGQDKVMNDLSDSMAKQG  
ALTGEHWDFAE TCRLFPHPPEAQICAVTRSTPLASVS AKPIYSDDD LIKLQADDPAIA  
KVLDFLVDPTN NAPSSGDFETIPELRALYALHSSLKVVKGILLRVSGDHAPPALV VPRNQ  
RGVMLMYAHDLPSSGHKGINATYSALKQIAFWPHMKKDVTDYVNGCLVCCQFQPTNP  
THRAPLQKKGISFPWSDIQIDWVGPLTKSSRGNKYFLT VTCFTKWVECLPAPNDTAQM  
TALLLMNHVFSRFG LPMRVNSDRGTHFTA EVMQQVWNTLGVKANFHVSHHPQSSGQV  
ERANRTVVNILKKYVAASHKDWDIKLPLVMMAIRATPHESTGTSPFEMMTGRQMTLPL  
HLLYQPGEASVATA YTAHQYVADLHEHLKATFAFAQKHMEKAAEGRKTY YDQKASH  
QTLEVGDKVWYYL FVQPTGQANQKVGKLARKLLPRWTGPHVITDKLSPV VYQIKISQG  
RKEPILK WVHRNQLKLHKHPVGLVGFNQ TQSN\*

> Loki-Oja consensus sequence *env* gene

TTGCCTCTCTGTCTTATCAGGAAGATGATACTGCTGGTGATCGCAGTGCTCCTCCTTG  
TCTCAAGCCAGGCACGTTTGGAGATTGTTGAACCGGGACCGGAGTCAGGAATTGTG  
CTGAAGGAACACCCCGGACTGTTAATCACGAACTGTCGCTGGCACACCCAAAAGAT  
CTTTGTGAGGCTCCGTCCTGATGCAGTTTACAGAAAACATGTGCAGGCGACATCCAG  
CTTTCTCTCTGGGCTGCTGTTACCTGGACAATGGATGTAATTTACATGCTGAGAAT  
GATATCGTTCACATGCTAACTCAGATGCAAAAATTCACGATCACCCAGTCTGAGCTA  
AGTGGCGTTGGACACCGTGATAAACGTTTTATCGCTGGGCTACTTACCGCTGCCTCA  
GCTATTGGTTCACTGTTTAGTCTGGGGGTTTTCCGCTGTAAATGCAGTCACCCTAGCCA  
CCCTCAAGCGTCACATGAATGAGCTACGTGATGAGATTCCCCAAATCCGGGGGTCAG  
CTAGATATCCAACAATCACAGGTACAGACTATGGGAAAACTCTACAGGACACTGT  
GCTAATCGTGAACACCCACAGCGAGACTCTTAAAACTTAACCAGGGCAGTAAACA  
AGTTGTTAAGCGTAGTTAGTATAGACTATGCACACATACTGGTAACCATGCTAC  
TGGCTGACATGACTCGAGACATCGGGTCATCCATTGATTGCTAGTCCTCGGTAGAA

TACCCCTTATCTAGTGTCACTAGAGTTGGTCCAACAACCTCTTATCTGAAGCAACCA  
GAGAACAGATAACCCCCCTACAGGCCCATCTGGCCTACACCTTGGGAAGTTCAATTC  
CCATCCATGTGGATCCGACGGCCAGGGAGCTAGCTTTCTTGATCCACATCCCCATCG  
TCTCTCCAGAAAACATTTACAGACTCAAAGACGTCATAAATGTAGGGATCTGGCAA  
GGTGACGTTTCATGTGAGGATGCACACACCCAAGGTCATCGCGTACCATGACAGCGA  
TCCAGAGTTGTACCTAGCGCCAACTTACAGTTGTGTACGCCCACTAGAGATATTCA  
CTACCTGTGCCCAAGCAAACCGTTCGTGCGAGATAGCACTGGTGGTCTGTGTGGACT  
TAAGCCAATCCACACAGATACTCGCTGCCCACTACCATTACCCCTCGCAGGCAAAT  
GACCACCACGCAGGCGGAGATCGTTGGAATCGGTGGTTGGTTCTGACACCAGTAA  
CAACCGCGACCATCATGTATGATCAACATGACACCTCAACCCGAATGGAACCTACCA  
TGGAGTTCCATCTGGGTTGACGTCCCTAACGATGCTATGGTACACGTGGACAACCTA  
GCCCTCTATCACCTTCACCCAGATCAATATCAAGGTGAAGTAGAGATTTGACTTTC  
TTAGCCAACATACGATCGAACTCAACTCTCGCACAGTGGAGCAAGTCGACTACGA  
AGGGTCGCGTGTAATTGATGTAGGCCCATTAATAAGGTCCTCAAAGAAATGGAAG  
CACGTCAGAACCCTAATATTCAATCCCTTACTTACGCTTGGTCCACCGCAGATACTG  
TATTAGTAACTCTGGTAGGACTCGGATACCTTCTCACTTTTGGAAACCACCTATCTTTA  
TGTTAAGAAAACCAACATCTTTGTAGTCAGATAGACAGGTGTGCGCAGTCGATTGGC  
TCGAGGGACTCGACGGAGATTTGCTGAAAGAGAGAACCATGCTAACGACAGGACAG  
AGGGGTCCCTCGAGATGAATCTTAGAACAGAACCTCTCTCCAACCATTTCTCGACC  
TGGGCGATACTCTGTGA

> Loki-Oja consensus sequence Env protein

LPLCLIRKMILLVIAVLLLVSSQARLEIVEPGPESGIVLKEHPGLLITNCRWHTQKIFVRLR  
PDAVYRKHVQATSSFLSWAAVTWTMDVISHAENDIVHMLTQMOKFTITQSELSGVGHR  
DKRFIAGLLTAASAIGSLFSLGVSAVNAVTLATLKRHMNELRDEIPQIRGQLDIQQSQVQ  
TMGKTLQDVLIVNTHSETLKNLTRA VNKLLSVVSIDYAHIQLVTMLLADMTRDIGSSID  
SLVLGRIPPYLVSLELVQQLLSEATREQITPLQAHLAYTLGSSIPHVDPARELAFLIHIPI  
VSPENIYRLKDVINVGIWQGDVHVRMHTPKVIA YHDSPELYLAPNLQLCTPTRDIHYL  
CPSKPFVRDSTGGLCGLKPIHTDTRCPTTITPRRQMTTQAEIVGNRWLVLPVTTATIM  
YDQHDTSTRMELPWSSIWVDVPNDAMVHVDNLALYHLHPDQYQGEVEISTFFSQHTIE  
LNSRTVEQVDYEGSRVIDVGPINKVLKEMEARQNPNIQSLTYAWSTADTVLVTLVGLGY  
LLTFGTTYLYVKKTQHLC SQIDRCRSLARGTRRRFAERENHANDRTEGSLEMNLRTEP  
LSPTILDLGDTL\*

>Loki-Sri consensus sequence

GTAGCGGACACTGGTGGACGCCAGTGACCAGACACCAGATTTATGGTAAGGACACT  
GGGGTGCTCTGGAGGATATGGGGAGCCTCCCATGTCCACTTTCCCATCATCAAACCA  
TCACATGGATAGAAAACAGGGACGAAATGAGTTCCCCTCACCAATAGACTAGCTTTT  
GAAGATAACCATCGGAATTTATGGCTAGCTCATCGAACTCATTCTGAACCAACACTCC  
TGCACCAAATGGGAGACAAACACAACACTCTCCCCACAGACTGACAATGAATTCATG  
TTTCATCCCTGACACTCATCCGGGATTGATAGGAGGGTGCCACCTCTTATCAAATAA  
CATGAAAAGGAACATTTAGCCATCAAGGTGCTAAACCACCAGGATTCACACTCCTG  
GTTTCATCTTCTCTACAAGAGAAAACAACACTCTCACCTTTAACACCCCTTTCTTACCC  
AAAGGGGGGTCTCACGAGGAACCACAGACCCCCGCCATAAAACCATCCTACATTCC  
AAGCCGGATTGATGAACTATTCCACATTTTATAAAGCATGATTGAAATGTCATTGAA  
CCAAACGTCTATCACCAGGTAATTCATGCAGTATTACTCTGGAAAGATTTCAACTA  
AGTATGATCCGAAGTTCATTTCTGTAGCCACATGGAGGCTGAGATAGGTTTTATTA  
GTTCTAAGGTAATATCCACCATGTTACAATACTGCCATCTAAGGACCAGACTGGAC

CCCTTTTTCCCTTAGGGAATTAAGAAATAGACAAACTTAATGCATCACTCTGACATT  
ACTGTTTTATATTGTAAGTTAGCTATATATTTGTGTGGTTACAAATTGTTATCCTCTC  
ATTGATCTATGTATTCTATGTGTGTTGTTAAACATGATGATTTTATTAGTTATCTTGT  
ATATTCCAACTTTAGCTAGGTAGTTGATATAGGCCGTTGTCAAATGAATGGGCCA  
TGGTGGGAGTAGAATATGCAACACTTGC GCGTAAAACCAAATTAACAAATTA  
TAAGTTTTATTTCTCTCTTTCTTTATTGAAACAAAGAAAGAGAAGGAAGACCAAAG  
GGGTGGCGACAAGTGTCAAGCCCCCCCCAGCTACACACACCCCGAGGATAAAACAG  
CAGGATCCTCCAGGACTCGTCTTCTCGTTCTTTTTCTTCTTCTCGTTCTTCTTCTTC  
TTTTACGTCTTCTTTTGCATAGCTTCTTTTACAATCCTTCGTCTTACAACCTTTCTTAC  
AATCTTAACTCTTACGCCTCGTTTCGCGCACTAGCTCACGTTCTGTTTCTAGCTTAAAC  
TTTACTTCTTACACTTTGGTGC GCGATTTTGCCTTACTATTTCAACAAGCCAAGCCT  
TCCAAATTGAATCACACACAGGTGTGTATAAGTAATTTTGTTCGTTTTTCTTTTTGTGA  
CAAATCCAGCTTTTGTCTAGAAGATTTTGAAGTTTTGCGTCTGTTGGCCAACACC  
AACTCCTTCCAAGTTATCTGGCAAATTAAGTCAAATACTAGCGTTTATTCCGCTGTCA  
ACCTCCGGCCCTCCGGCTACACGCCACACCAGGACCGGCTAACCAGATCTCGAGAG  
TGCCTACGAAGAAAGTCTGCTGGCAGACTGCGCCGACGCTGATCCACCGAGACATC  
GGCAGAGCCCGTCACCCCTGGCAACGGCCGTCGTCTCTGAGAGAAACCCACTTGG  
GTGTGGCGTCCCGTCGCCTAGCAACCAAATCCGGGGCTCCAGCCAGGATCTCAAC  
AGCGCTCCGCTACTCAAAGTAGGCAACTCTATCCTTTGCTCCGAAGTGGGTTGATGT  
CGGAATAATACTAATCCCGATTTAATAATTCTCCACCGTTACGAATAAATGCTATAC  
ACATATCTAAATCCATTCTTTTACCATCGCCCAAATCACTGCTAGTTCAGCTGGTA  
GATATAGTTATTATTAGTTATAGATTCATGTCATTATCCTTGTTCAATTTACTGTGTT  
AGTTAGTCAATAAATATTATCAACGTAACCCAGTCGTTGCCTGTGTTTCTTTGAGGTG  
AAGATCGGAGATCCCTGTAATCGAGAAATCACAAGTTGGATGTGAGATTGATCAA  
AACAAATCTGACTTTAATCAAATTGTCTCCCTGAGGACTGGTGGCCCATCTTTTAA  
CGAGAGCAAATTCAAATTGTGGTATTCACGCTACATATATTGGTGCCCCGTGTGAG  
GCGATTTCAAATTACCGTTCTTCACTACAAAGAAACCTGTTGAATGCTGAGAGTGGC  
CTCACTCTCTATCTGCTGATTCAATTGCATTTTGGCTTTGTGCTTGTTACCTGTTGTGT  
GTGAGCATTTGAAACCTTGAAATTTTATTTGCAAATCCTAGAATCTAAGCTCAGTGG  
TAAACTGTGTGGTTGGATATAATAACGTGGACGCACGTTGATTAGGCTGAACACGTC  
GAACGGAGTCACTGCGCCGACAGTGATTTCCCGACCAGTGGTGGCGGTAACGTAC  
CTAAGCGTACACCCGTCAACGTTAATGATAGCCTAGAAAAGTGTGTTAGCTAGAGCC  
GGTGAGCTTTACGCTATTTATCTAAAATTGCATGCGACAGCGTGATCATAACGCTTAT  
TGAAAAGGCCTGTTGGTGGAAAAATAGCTATTGCGTGTCCCAATAGCCAGTTGTTAA  
TCCACCCTGAGTGTGGGTGGATTTGTCCGCGAGTCCCGGTGAATTCAGCCTGCCTCA  
GACCCTCGACGCTAGCCTGTTAGCTTAGCTACCTAACAAAGTCAGTAACTGCGACCTG  
TCGCAGCAGAGGTTTATACGTAGGGAATACCTACGCGGGAGATTTAAAGAGAAATC  
CCCGCCGTCTAACGTCAAACACCGTTGTGGTTTGAATGAGAAAGGAAATAAAGTGC  
TTTCTTGTCTGAGGTCCAGAACGGACCTGTGTTGAAAATTTTGAATATTGTCTCAAT  
TACGGAGCGTAACCCTAGCTCCGTGAATAATTGACAATACAAATAGGGATAGTGCTT  
GAAACGATTGATTGAAAAAAACCCAAAAGGAGACTTGGGTTGGAAATTGAATACTG  
CAGCAATAGTTGCGCGTGGTGTGTTGCCCGTGGTGGGTGCCCGAGGCCCGCCGTGCCTC  
GTGATTGATTCTTTGAAAAAGTTTAAAGCTGTGGAGAAGTTGCCTGCGTGGTGTCT  
GCGCAAGACTAACCTCGTCTCACCTGAGCTGCGATAGTCTTCCAGTGGGCGGGACTA  
AAGCCGCCATCGCTGACGACAGCCCCCTACTCTTCTCTTAATCCTAAATCGCGAA  
CCAAAACAGATAAACCTCTGTGCCCCCTGGTGGCCGATTAGGGTAACTGAGTTAAG

AGTGGGAATATTCAAACACTGACTCTGCGCATGAAACACCTCACAATCTAGAGCTTT  
AAAGCGACCTCGAACTGAAAATTGGTTGTAAACTCACAACCTTTATTACATTATAGCC  
TGTTTTTAACCTGCCACGCTATTGATTTAACCTGCATGCTACTCTCACATTCAGACCT  
TAGACTCTAACCCACTTGAAGTGAAATAGAACTAACTCTGAATCATATACTTTTTCT  
ATATCACCCGATACTTAGTGACTTGAAGTGTCTGCTGGTGCATGAACACATTATCAG  
CCCTTAGGTTAAGAAATACTACAGAGACACACTTGTGTTAACCTCTCAGACTCACTT  
CCTCACTATAGTATTAAGCGATATTAACCACACCTTCATACTACTCCTGATCCAAAG  
AGTGGACCTCACCTGGATATGCTTAAGAATTCGTGCATGCTTATGCGCTTTTCATGTC  
TTTGCATCGCTTTAAGTGGATTGCTTGTGTTGAAAATTCTTCTTATTGACAGTTTTATTA  
ACTCCTCCCTTTTACCTGAACACCACACCACGATTGAACAAATATTATCTAGGA  
AGATAATATCCCTAAGTTAACTAAATTAAGTTTCACTTGTGACTCCCTGTTTCGGTGT  
GCTGTCCCTCTGCCTGTGTTTCTCAGCTTGCATTGCTACTAGCTTTGATACTACAAGG  
TAGACTCATCAATTGGAGGTTCCAATTTGGGAGTTATCGTACCTGGACCTGGTTAAT  
CTGGAACTCTACCTATAAGGTGATCACTGCCCTCCAGTGACAACCTTAAACAGGTGTT  
CCAACCTTAAACACAGCAACGTGGGTCGTTAGCTTCCCAATTTTGAGTTCTATCCCTTT  
GAGAGCCAACCTGCCTTGGAGTCACTCACTGCTGATGATTGCTTGCTTGTAAATAAGGC  
ATTACAGTGACACCGCCGTGACTGCAGTCTCGAGAGCGATATATATGTATATACATA  
TATTTTTCTGTTTTTTTTATAATTGTTGTTGTTGGTAGTTTTCTAGTGCCTGCATATA  
TCAGTCTGCACTGTTATCGGCTCTGACACTATAAGGCAACCCTTCAATTGGAGGTT  
CCAATTTTGAAGGTTACTGCACCTGGACCTGGTCAATTTGAGTTCTACCCACACCAA  
GGGGTTCCAATTTGACACAGTAACGTGGGTCTTAACTATTCAATCTTGAGTTCTATC  
CCTTTGAGGACTAACTGCCCTAGAGTTACTCACTGCTGAGACGTGCTAATTGTAAGG  
CAAGGCAACTGCGGGACCAACCCCATTTGCTAGAATAATAACGCCATAACAGTTA  
AGTGGAAATAACACATAGCCCTCAGATATCTCAACGCTCATAACGAGTCCATAGTAA  
GAGTACACAGAGGTTGTGATTAGAACTCACAGAACGACTTGATAATCACATAAGGC  
CTACTAACAACCTGCTTACTGAACTGACGCTTCCCTCTCCTTTTTCTCACTTCCTGATT  
TGGAAGAACCACCAACTCAGTAACCTAACCACCAGCATGTCTACACCAGCAA  
GTAGACTCGGCAGCTGCTGCCACACCTATACCCAGAACCTCAAACCTGAGGACTC  
CCTTGAGAACTTAGAGAGTGCCTTAGTGGACTTAACGGAGGATGTGCTACCCGGCTA  
TGCCATTCTCATCCAAAACACCGCCCTTTAGAACTAGAACCAATAATGCTAACTT  
AGTCACTGAGGCCCTAACTAAACCCCTAAAAGATAAGGCGTTAACCAAAATGCTTG  
GCAACCTGGCCATCGTGGTGACAGCCCGACTCAAATACGCAAACGATTTGTTGACA  
CAAGCAGCCGATAAACTCAAAGTTCGTGCACAACAGCTTTCACAGTTACAAGAAGG  
GGCCACATTCTTTCAACATCAGCTAAACCGAGCCACCGAGCCTCGGATGAATCTGA  
AACACGCATTGAAGAGCTCGCAGCTCGACTTGATGTGGCCCAAGGAAGAGAAGTTG  
AGTTGGAGAACAGAAATCAAGAGTTAAAACGGTTACTCCAAAACCGCGAACAAGAG  
TCAACTGAACTTAAAGACCAACTTAATGAGATAAGTAAAGAACGAGATGAATCACA  
TGATCTCCTTAAACGGGCAATGGAAGAGATAGATGACGTAAAAGCCAAGAATCAGA  
CCTATGCAGATCACCTGCAGGATGATCAGAAACAGATTCAACGGCTACAAGAGCAT  
CTACACGAAGCGGAACTCAGGGCCAAGGCATCTCGCCAGCAACAGGAAAGCAAAG  
AGGCAGAGCTTGCATCAGTCAAGAAAGAGCTACAGCAGTCTTTGAAACAAGACGC  
ATGCAGCAAACGGGCCATATGAAATATTTGGAATAAAGATGACGAACCACCCAT  
GAGGGGAACTCAAGGTGACGTCCTACCTCTTTTCTCACCTCTTGTGTCAAATCCTTTC  
GACTGGCAAACGCTTCCAAAGCTGGCCACCACGACTTCTTCCCCGGAACCTAG  
GTTTCCCTCAAGCACCCGCACCTCGGGTGTCTCAGATCGAGACCTTGACAAGATTGC  
TCGCAACTTGCCACGCTTTGAACCCACTCCTGGTGGCTCCCAAACATCAGCAGCTA

CTTGAAGGACATCGACTTCTACCTGCGAAAGTTCCCAAATGCCACGGCTGATGACCG  
GATATACTTGATCAAAGTGACGTCCGGATGTCAGGTGGGTAGGTTCCCTTGAACGACA  
GACAGACTACGTCAGAAGCAACTACGACCTGCTTTGCCAGGCATTAATAAGGGAAT  
TCTCTGACCCTATCTCACAACAGGTCTAACAGCTGCTATGACCACCAAACAGGGGA  
GGCATGAGTCTCCTCATCAATATTACCACCGTCTTCTTTTGGCTTACTTTGGCAACCG  
AAACGAACCTGGTATGGAGGAAGACTTGAATTTCAAACCTCTCTTCGTACAAAACCT  
CCATCCTGGTACTAGCTGTCACTTAGGTGTCATGGCAAACCCGTACACCTCAACCAT  
CCAACAACCTACGTGAGCTTGCTACCCTTGGGTTTGCCAAACAAAAGCAATCCCCTC  
AAAACAGTCAGAACCCAACATCGTTCTGACCCTCAACGCCAATGCTCCGCCCATGG  
AGTTAGAAGGGGCCCCAAGCGGGGAGATACAGGGACCTGCCAACCAAAGCTCCAG  
AAGCCATCGATTTACAGAAGAACATAAAAAGGTACCTACCCCCACACAACCTACCACG  
AATCCTCAAGACCTCCCTGGTCTGGTAAGGGACAAAACCAACAAAGATACGAGCCA  
CGCCGTAACCTCAGTGGATCACCGCCGAAGCAGGTTCCACCCAATCAATGGGAAAA  
TCGTAGAGCGCGTGATGACCAGGGACAGCATCGATTCCGGCCCCAAGGTAGATACC  
CACAAGACAGGCGACAAGTACAACACACTCGCCAAGACTCATCCGAAGAAGACAC  
AAAGCAAAGTGGTGACTCACAAAATCTCCACGGAAATCCGACAAGACAGAAGGTA  
AGAACAAAACCTCTCGTCTAAGCGAGGAAGAGATGGAGACCATCAGGCGCCTCATC  
CAAAGAATGCAGCTGAATAGCAACAAGGCTGATCTCCTATCAATAACCTCAGTAGC  
CACTGAGGCTGGCCCTCAAACAATTCCCCCGACCAACCTGATATGGTGGTTGAAG  
AATTGTACCTAGCCCCTAGCTTACCTGAGTCTATGCCACCACAAGACCAGACGCTTT  
CGACCCACAGACGACAACGCTAACGAATCAGCTCAGGAAAGTAACAAATCGATGCC  
CCAAGCGCAGTCTTGGTGGTGCAGCTTGACCCCGAAGACAGGTCCCCTTGTGAAGA  
AGCCTCGGCCATCCAAGTCGAACCACCTGTTCAACAGTTTCTCTGCCACCTTGATGA  
GAAAGGGGTTGCACGGAAATTCTACATGTCTCTGACGCTTGAAGGAACGCTCAAAC  
ACGAAGCACTCCTTGACACGGCAGCAGACATCACGTTGATGTCATTAACACTTTTCA  
ATAAGCTACAGGGAATGGCTCGCCAATCTAACAAAACCTTGAACTCCAACCTTGT  
CTCTGGAGGTCCAGCCATACGCTCCCACCGGAACCACACTGACAACCATGTCAGCTA  
TACAACCTGACCATTTGGACCCATGACTCTGGTCCATCCGGTGTATGTGTCTCCCTTGA  
ACTCCATCCCCCTTCTCATTGGCAAAGACCTCCTCAATCGATTTGAACCCCTAATCG  
ACTTCAAACGCCTGAAGATGTGGGCACAAGTGCGACAGCCTCTGCCTATTTCTCTTC  
CCCAAGACACTCACATACAGTGTTCGTCCTTGAGACAGAAGGGGTCAACACTTTGG  
CCCAGCGTGCTCGGTCCAACCAACCAGACGTGACTCAGGTCAATGATGACCCCGAA  
GTGAGGACGGACACCGCCACAATACCAACGTGGCCACCTACAGACTCTCTGATCCA  
ACGAGAGACATTCTTGTGTGCATTAATCCCTCAACTAATGCCAACGAATACTGCC  
TCAAGTGGTCAGTGGCATAAGACTTGAAAACACTGACGTTGAGGACGTGACTCTAG  
CCCTCTGGGCCGACAAATCTGCTATTAGCCAAGAGCTATATAACTCCCTCTTACAAG  
CAAACCCCACTCTACAGCTTATGAAGAAAACCTTTTCGTTTTCCCTCAGACCCTACGC  
CACAGACTATGCTCACAGCAGAAGGTGTCTGCGCCTTGAAGCTACAGTGGAAATCAG  
AGGGAGCTCAAACATTTCTTCCCTGGTTCATCCCAGACCTACCACATCCTACCTGCATA  
GGCAGCGACATTCTGGTTAGGCTGGGTGCACAACTGGACACTGTCAACCATGTTTTG  
TGGTCACTCACCGGAGCTCGAAACGACTCAAGCTGCCCTGACCCTGAGAACATGAA  
GTCGGGACAAACCATCCCCGACGCTGTCAGATAAGTAATGAACATCACGTAACGG  
TACCACCATAACCAAAAACGTGTCAGTACGCGTACACCTGCGAACAGGTCAACGG  
CTTAATCACCCACAGGCACTCTTTCAACCATCTCCCCTTTTCTTCGAAATGGGACTCT  
CCTTGGAAAGCCACTCCCTTACTAGAGCTATGCTCCAGGTCAACTTACTTGTGGTTCA  
AAATACCACCGCAGAGACCATACTGATTCCCAGGTCCACACCACTAGGGTGGCTTAT

CAGTACAGAGTTCCACGATTTTGGAGTTAGGAATCCCAGTTATTGGGGCGTATACCCCC  
TCCTCTACTCCCTGACAACCTCAGACGTGCAGGTGGTATACACTAAACCATCAAAGC  
GATCGCGATCTTCCCAGTCATGGCGTTTGAACACGACTCCATCGGACGTGTTGATCT  
CACGGAGGATAATCAAATGTTGCTTCAGAGTATCAACGTTTTATCTCTGGATGTAAC  
GTCAGAGACAGCCCCCTACCCACCTCAATCAGACATCCAAAACGAACCTGGAGAGG  
CGACACTGGAACAGACAACCGAGCCACGCTCGGACTTCATGGCTCAAATAGACCAG  
GTGGTGACAGAAGCCGACGCACTGGACTGTGAAGAAGAACGCCAAAAACTCCGCA  
ACATACTCCTGAAATACCAAACATCCTTCGCTGAGGACTCTTTGACTGCGGACTCA  
CCACCATCCACTCAGTGCGCATCCCCACTCCACCTAATGCACCACCAACCTTTGTAC  
GACAATATAAGATTCTTTAGCATCGTATGAACCTGTACAGGAAATCATAGACAACC  
TGCTAGAGAAAGGAATCATCCGCCCTTGTAACAGCACCTACTCAGCACCGCTCTGGC  
CAGTGCTTAAACCCAACGGCAAATGGCGGGCTGACCATCGACTACCGTAAACTCAAC  
CAACAGGTGCCTCTGTCTAGATGGCCTATGACACAGCTTGAACAAGAGCTCCCTAAA  
ATCAGGGATGCCAAGTACTTCTCCACGCTTGACATCGCATCAGGATTCTGGACAATC  
CCAGTACATGTTGCCGACCAGCACAAACTGGCATTCACTTTCGCAAATCGACAATAC  
ACCTTCACCAGGTGCCCGTTTGGCTACGCCAACTCACCTGCTGAATTCAACATCTTCT  
TAAACAAAGCGTGCCCTGATGCTAACGACAGGGGCACACTCATCTATGTTGATGAC  
ATCCTCATGAGAAGTTCTACTCTGGACACGCATCTGGAGGAGATTGATCATGTCTG  
GAGCAGCTCACAGCCGCTGGCGCGAAGATATCACTCTCAAATGCCAATGGTGTA  
AACCAAAGTGAACATATGTTGGCCTCCTGGTAGGACCACGGGGGGTTGAGCCACAGA  
TAAATCGTGTACAAGGAGTCACAAACATCAAAGCACCAACGAATGTCTCTGAACTT  
CGTAGCTTCTTGGGGGTATGCAACTACTCCCGCCAATTCATTGAAAACACTACGCTGAC  
TTGGCCAAGCCATTAACAGAACTCCTTCGAAAAGATGCGCTATTTGTCTGGAACGAT  
TCACAACAACAGGCAATGCAGGCCCTTAAAGAAAAACTTTGCACGGCTCCTTGCTTG  
GCCTATCCGAACTGCAACAAAGAGTACCACTTGAAGTGGGATTCTCTAACCATTG  
TTGAGCGCAGGCCTTTACCAAAGCATGACCTCGACAAACGCGTTGTTGCATATGCC  
AGCAAAACTCTGTCACCCCCTGAACTTAAGTACACTGACTGTGAAAAAGCTCTCTTA  
GCGACGGTGTGGGCAGTCAAACACTTCTCCAATATCTTGGCGGACAAAAAGTGATT  
GTGGAAACCCACCACCAGCCAGTAACCTTCTCAACAGTCAGCGACTCAGAGATGG  
CGTAGTCACTAATGCACGCGTAGCGTCGTGGCTGATGGCCCTACAAAGCTTTAATAT  
GGAGGTGCGCTACGCTCAAACCCACAAAACACCCTTGGGCACAGGACTGGCAGCCT  
GCCAACGGTGTTCAGACGACTCCCCGACCAGCGTAGCACCCAGTCTGCGAACTGCCA  
CCTCCAACACCTCCACGCCACCACTACTTTGACCAAAACATATGCAAAGAGATGAC  
AACGGCATAACGTGGATGGCTGCTCTTTCCACCATGAAACTCAGATCCGTGCAGGCGT  
GGGAGTTGTGTGGGTCCATGACACCCCATATAAACCCAGATGTTCAAACCTGGGCTC  
CCAGTCTTCCCAGTATGCTGAAATTGCTGGCATCCTGATCACGCTGCAACTGGCTGT  
AGAAAAAGAAATCAAACGCTGGTAATCTGCACCGACTCCAATATGCGCGACTCA  
GTTTCTCTTGCCACCTTCCCCTCTGGCAACGCAATGGCTTCATAACTTCCAACAGGA  
AACAGTCAAGCACAAAGAGTTGTTTCGTGGCCTGCAACCACCTCGTGGACACACAA  
GACATGCAGGTCTACTGGAAAAAGGTCAGGGGCCACTCCCGTGTTCGGGGCAAGA  
CAAAGAACTGAACGACCTAACTGACACACTTGCTAAACGTGGCGCTGTTGAAGGCA  
CGCCGTGGTCACTGGAACCAGAACCTGTGCCTGAGCCGGATTCCCTTGCCCTCCCAC  
CCACCCCTAGCATCTGTGTCATCACTCGGTCTCATGCGGCCACTTCAGCGCTGCCAC  
GCCAACTGACATAACCACTGCCTCTGTCCGTCCGGCTTTCTCTGATTCGGACCTCAT  
CTCACTGCAAGCGTTGATCCAGCAATCAATACAATGATTGGCCACCTAACCGACCC  
AACTGCTCGGTTGATCACAAGCGATGAACTTGCCAACTACCAGACCTGAAGATCCT

CTTCAACGGACGTGCGTCCCTGCGCCTGCTCAAAGGCATCCTGGTTTATGCTTCCGA  
TGCGCTCACTTCACCTGTGTTCGTGGTACCTCGTAACCACAGGGGGGTGATGCTAAT  
GCATGCCACGACTCCCCATGCGCAGGACACAAAGGCTCCAAAGCGACATACAATG  
CACTCAGGCAGGTCGCCTACTGGCCACAAATGCGAAAAGATGTGGCTGACTACATC  
AAAGGCTGCTTAGTCTGCTGCCAGTTTCAACCAGCCAATCCTGTGCACAGAGCCCC  
TTACAGCGAAGAGGCATTTCCCTCCCCTGGTCCGACCTCCAAATCGACTGGGTTGGA  
CCTCTGACCAAATCAACCAGAGGCAACAAATACTTCCTCACGGTCACATGCGCATTC  
ACTAAATGGCTCGAGTGCTTACCAGCCCCAAACGACACAGCTCAAACAACCGCATA  
CCTACTGATGAACCACATCTTCTCCAGGTTCCGGTCTGCCGAGCCGCGTCAACTCGGA  
CCGGGGCACACATTTCACTGCGGATGTAATGCAAGAACTCTGGCAGATACTCGGTGT  
GAAGGCCAACTTCCACATCAGCCATCATCCCCAAGCCTCTGGTCAGGTAGAACGAG  
CTAATCGAACCGTGGTTAGCGTTCTAAAGAAGTACGTGACTTCAAACCACAGGGACT  
GGGATGTGAAACTGCCGCTGGTCTTAATGGCCATCAGAGCAACACCGCATGAAGCA  
ACGGGGTTTTCCGCATTTGAAATGATGACAGGCCGACAAATGACACTCCCCTGAC  
CTGCTTTACCAACCAGGTGAAGCTAGCGTTGCAACAGCATAACAACCCACCAGTA  
CATGACGGACTTGAACCAACACCTTCAAGCCACCTTCGCCTTTGCCCAAAAACACCT  
GGACAAAAGCGCAGAAGGACGTAAGGCCTACTATGACCAAAAAGGCTTCACATGAAG  
AACTCCAAGTGGGGGACAAGGTGTGGTACTACAATTTCTTCCAACCAACAGGTCAA  
ACCAACCCAAGCACGGGAAGGCTCGCCCCGAAAGCTCCTCCCTCGGTGGGCCGGTCC  
CTACCTGATCACAGACAAGCTTTCCCCCGTTGTGTACCAAATCAAGGTTAGCAAGGG  
CCAGAAAGAACCGACCCTCAAATGGGTCCACCGCAACCAGATCAAACCACATAAGA  
CCCCCATGGGATATACAGGGGACGACAGCACCCAGTCAGGTCATAAACTGATTAT  
AAAACCCTTAGCACACCTAGATATCGCTCACCAACATCGAACAATCGCGATAGTGC  
CTCGATCGTTGTGCTAACCTAAGAACGAGAAATCGAATTAATAACTACACTACGAACCC  
AAATTTTAAACTAAAACCCCAATCTACCTTCAAGCCCGTTCAACACTTCCAACAAGT  
GATTGACCTCGCAAAGTGAAGTAGTGGGGGTGACTTAACTAATCGCCAGCCCATTTC  
AAACGAAACACTAACTAAATTGGTGGCGCTAATAACCGGTAACCCTGTGTGTTTTTC  
CCATCAGGATGACGTGGCTGCTGCTCGCCATCGTGACTCTCGGGATGATAACTACCC  
CGGCGAACCCCGAGACCGTCGAACCTGGGCCTAACTCGGGGATTGTTCTAAAGGAA  
CAACCAGGACTTCTAATCACAAATTGTCGTCTACACACCCAGAAAGTGTTGTTAGTA  
TTCAACCCTGAGATGGTTTGTGCGCGAAATGTCCCACCACAGCCAAACTAACCTCT  
TGGGCTGGCATTGCTGGAACAAGGAGGTTATAACCCACGCAGAGGTAGACATAAC  
CCACATGCTGCAACAGCTTCAGAAATTCACCATCACTCGGTCTGAATTAAGCGGTGC  
CAACAAAAGAGAGAAGCGGTTTCAATTGGAGGCTTGCTAACCGCAGCTGCTGCTCTCG  
GCTCTCTCTTTAGTCTAGGGGTCTCCTCAGTTAATGCTGTAAACATTGCCGCTGTCAA  
ACGACACATGGGGGAGCTGCAGGCTGAAATCCCCGGGATTCAGGAACAAATGGTAA  
ACAACAAGCACAGCTAAAACTATTGGGAAGACGTTGCAGGGAACAGTCCTAGTA  
CTTAACACTCACAGTGAAACCTTGCTCAAGACTTTAGGAGCGGTAGACCTGTTACTG  
TCAGTCCTGCAGGCAGACTATGCTCACACAACTGGTGACTATGCTAATGTCCGAC  
ATGCTTAGGGATATTGGGTCATCAATTGATAGTCTAGCTATAGGTAGGATCCCTCCC  
TACCTGGTTCCACTCTCCCTGGTACAGGACATCCTTGCCACTGCCACTCGAGACATA  
GTGACACCACTACAGGCTCATTTAGCTTACACCCTAGGTAGCTCAGTACCAATCTAT  
GTAGACCCAGAGGCCAGAGAAGTAGCCTTTATTATAAATCTACCCATAGTGACACCT  
GAGAACATCTACAGACTGAAGGACGTAGTTAATGTTGGCTCTTGGCAGGGTGAAC  
GCACGTCAAAGTGCACACACCACCGTTGTGGCATAACCACGACAGCAACCCTGACT  
TATACCTTGCTCCCAACCTCCGCATGTGTACACTGACAAAAGACATCCACTACCTCT



GCCCCAGCAAACCATTCGTACGTGATAAACACAGGTGGTATCTGCGGCATTCAAACC  
ATGTCTAAAGACTCTCAATGCCCAACAACAGTCACGCCCTCTACCAAATGACTACG  
ACTCAGGCAGAAATAGTGGGAAGTCGCTGGTTAGTTAACACCCCAGCGAAAATAGC  
AACTCTCACTTATGACCGACACGACACCTCCACCCGTATCGAACTACCTCACCGCAC  
CCTGTGGGTTACCGTGCCTGAGGGTGCCATCTTTCACATAGACGACTTAGCCCTCTA  
CCATCTAAACCCTGACCAGTATGAGAGTAACATTGAGGTGTCTGACTTCTTCAACAA  
ACATGCCCTCGAGTTGGATTCCGAGACCCTAACCCAAGTCCAATACGAGGGAACTC  
AGACCATAGACGTAGGCCCTGTTGACAACGTTCTAAAAGAAATTGCCTCCCAGACC  
CATACTCCTAGCCAGCCTTTAACCTATGCCTGGTCTACTCCAGACACTGCCATAGCC  
GCCCTTGTGGCTTAGGATACATCCTGACCTTTGGTTTGACGTGCCTATACATCAGGC  
GCATGAAAACCTTGGCAGTGTACGTAGATCAGGGTCTGGACAGACTGAACAGAGGA  
ATAAGAATGAGGAAAAGAGAAACGAAACCAACCACTAATGACCTAGTGACTGTTGA  
CGATGAGACAACCTTCACCCGAAACCCTTCAGTGGCCCTGCCATCCTGGAACCTATT  
ATGCGACTAGTTAGATAAACCCATGTACCCAGTAGTATCGATATAGAGCCTAGTAAG  
CACTACTGGTAAGAAGTAGTTTAGATTTAGTGTCTTAATATAGGAAGTAACTATGCT  
AGTTTTTCTTTGTTTTCTCAAGTTGACACCCTACATACATAACTGATACACACTTAGT  
TAAAGACATCAACCCAGATTGCAATGGTAGTGTACTGTCACGTCACTGCCACCCAGA  
TGTCTCAACTCAGCTCAACGGTCCAAAACCTCCCTGGACAGCGACCATTGGACCGAG  
TGGGGGAATGTAGCGGACACTGGTGGACGCCAGTGACCAGACACCAGATTTATGGT  
AAGGACACTGGGGTGTCTCTGGAGGATATGGGGAGCCTCCCATGTCCACTTTCCCATC  
ATCAAACCATCACATGGATAGAAAACAGGGACGAAATGAGTTCCCTCACCAATAG  
ACTAGCTTTTGAAGATAACATCGGAATTTATGGCTAGCTCATCGAACTCATTCTGAA  
CCAACACTCCTGCACCAAATGGGAGACAAACACAACACTCTCCCCACAGACTGACAA  
TGAATTCATGTTTCATCCCTGACACTCATCCGGGATTGATAGGAGGGTGCCACCTCT  
TATCAAATAACATGAAAAGGAACATTTAGCCATCAAGGTGCTAAACCACCAGGATT  
CACACTCCTGGTTCATCTTCTCTCACAAGAGAAAACAACACTCTCACCTTTAACACC  
CTTTCTTACCCAAAGGGGGGTCTCACGAGGAACCACAGACCCCCGCCATAAAACCA  
TCCTACATTCCAAGCCGGATTGATGAACTATTCCACATTTTATAAAGCATGATTGAA  
ATGTCATTGAACCAAACGTCCTATCACCAGGTAATTCATGCAGTATTACTCTGGAAA  
GATTTCAACTAAGTATGATCCGAAGTTCATTTCTGTAGCCACATGGAGGCTGAGAT  
AGGTTTTATTAGTTCTAAGGTAAATATCCACCATGTTACAATACTGCCATCTAAGGA  
CCAGACTGGACCCCTTTTCCCTTAGGGAATTAAGAAATAGACAACTTAATGCATC  
ACTCTGACATTACTGTTTTATATTGTAACCTAGCTATATATTTGTGTGGTTACAAATT  
GTTATCCTTTCATTGATCTATGTATTCTATGTGTGTTGTTAAACATGATGATTTTATTA  
GTTATCTTGTATATTCCAACTTTAGCTAGGTAGTTGATATAGGCCGTTGTCAAATG  
AATGGGCCATGGTGGGAGTAGAATATGCAACACTTGCGCGTAAAACCAAATTAAC  
AAATTAACCTAAGGTTTTATTTCTCTCTTTCTTTATTGAAACAAAGAAAGAGAAGGA  
AGACCAAAGGGGTGGCGACAACCTGTCAAGCCCCCCCCAGCTACACACACCCCGAGG  
ATAAAACAGCAGGATCCTCCAGGACTCGCTCTTCTCGTTCTTCTTCTTCTCGTTCTTC  
TTCTTCTTCTTTTACGTCTTCTTTTGCATAGCTTCTTTTACAATCCTTCGTCTTACAAC  
TTTCTTACAATCTTAACTCTTACGCCTCGTTTCGCGCACTAGCTCACGTTCTGTTTCTA  
GCTTAAACTTTACTTCTTACACTTTGGTGGCGGATTTTTGCCTTACTATTTCAACAAG  
CCAAGCCTTCCAAATTGAATCACACACAGGTGTGTATAAGTAATTTTGTGTTTTTCT  
TTTTGTGACAAAATCCAGCTTTTGTCTAGAAGATTTTGAAGGTTTTGCGTCTGTTTGGC  
CAACACCAACTCCTTCCAACTTATCTGGCAAATTAAGTCAAATACTAGCGTTTATTC  
CGCTGTCAACCTCCGGCCCTCCGGCTACACGCCACACCAGGACCGGCTAACCCAGATC

TCGAGAGTGCCTACGAAGAAAGTCTGCTGGCAGACTGCGCCGACGCTGATCCACCG  
AGACATCGGCAGAGCCCGTCACCCCTGGCAACGGCCGTCGTCTCTGAGAGAAACCC  
ACTTGGAGTGTGGCGTCCCCGTCGCCTAGCAACCAAACCTCCGGGGCTCCAGCCAGG  
ATCTCAACAGCGCTCCGCTACTCAAAGTAGGCAACTCTATCCTTTGCTCCGAACTGG  
GTTGATGTCGGAATAATACTAATCCCGATTTAATAATTCTCCACCGTTACGAATAAA  
TGCTATACACATATCTAAATCCATTCTCTTTCACCATCGCCCAAATCACTGCTAGTTC  
AGCTGGTAGATATAGTTATTATTAGTTATAGATTCATGTCATTATCCTTGTTTCATTTT  
ACTGTGTTTAGTTAGTCAATAAATATTATCAACGTAACCCAGTCGTTGCCTGTGTTTC  
TTTGAGGTGAAGATCGGAGATCCCTGTAATCGAGAAATCACAACCTTTGGATGTGAG  
ATTGATCAAAACAATCTGTACTTTAATCAAATTGTCCTCCCTGAGGACTGGTGCCCC  
ATTCTTTTAACGAGAGCAAATTCAAATTGTGGTATTCACGCTACAC

> Loki-Sri consensus sequence 5'LTR

TGGTGGACGCCAGTGACCAGACACCAGATTTATGGTAAGGACACTGGGGTGCTCTG  
GAGGATATGGGGAGCCTCCCATGTCCACTTTCCCATCATCAAACCATCACATGGATA  
GAAAACAGGGACGAAATGAGTTCCCCTCACCAATAGACTAGCTTTTGAAGATACCA  
TCGGAATTTATGGCTAGCTCATCGAACTCATTCTGAACCAACACTCCTGCACCAAAT  
GGGAGACAAACACAACCTCTCCCCACAGACTGACAATGAATTCATGTTTCATCCCTG  
ACACTCATCCGGGATTGATAGGAGGGTGCCACCTCTTATCAAATAACATGAAAAGG  
AACATTTAGCCATCAAGGTGCTAAACCACCAGGATTCACACTCCTGGTTCATCTTCT  
CTCACAAGAGAAAACAACACTCTCACCTTTAACACCCTTTCTTACCCAAAGGGGGGT  
CTCACGAGGAACCACAGACCCCGCCATAAAACCATCCTACATTCCAAGCCGGATT  
GATGAACTATTCCACATTTTATAAAGCATGATTGAAATGTCATTGAACCAAACGTCC  
TATCACCAGGTAATTCATGCAGTATTACTCTGGAAAGATTTCAACTAAGTATGATCC  
GAAGTTCATTTCTGTAGCCCACATGGAGGCTGAGATAGGTTTTATTAGTTCTAAGGT  
AAATATCCACCATGTTACAATACTGCCATCTAAGGACCAGACTGGACCCCTTTTCC  
CTTAGGGAATTAAGAAATAGACAAACTTAATGCATCACTCTGACATTACTGTTTTAT  
ATTGTAACCTTAGCTATATATTTGTGTGGTTACAAATTGTTATCCTCTCATTGATCTAT  
GTATTCTATGTGTGTTGTTAAACATGATGATTTTATTAGTTATCTTGTATATTCCAAA  
CTTTAGCTAGGTAGTTGATATAGGCCGTTGTCAAATGAATGGGCCATGGTGGGAGT  
AGAATATGCAACACTTGCGCGTAAAACCAAATTAACAAATTAACCTTAAGGTTTTAT  
TTCTCTTTTCTTTATTGAAACAAAGAAAGAGAAGGAAGACCAAAGGGGTGGCGAC  
AACTGTCAAGCCCCCCCCAGCTACACACACCCCGAGGATAAAACAGCAGGATCCTC  
CAGGACTCGTCTTCTCGTTCTTTTTCTTCTTCTCGTTCTTCTTCTTCTTTTACGTCT  
TCTTTTGCATAGCTTCTTTTACAATCCTTCGTCTTACAACCTTTTCTTACAATCTTAACT  
CTTACGCCTCGTTTCGCGCACTAGCTCACGTTTCGTTTCTAGCTTAAACTTTACTTCTT  
ACACTTTGGTGCGCGATTTTTGCCTTACTATTTCAACAAGCCAAGCCTTCCAAATTGA  
ATCACACACAGGTGTGTATAAGTAATTTTGTGCGTTTTTCTTTTTTGTGACAAAATCCAG  
CTTTTGTCTAGAAGATTTTGAAGGTTTTGCGTCGTTTGGCCAACACCAACTCCTTCCA  
ACTTATCTGGCAAATTAAGTCAAATACTAGCGTTTATTCCGCTGTCAACCTCCGGCC  
CTCCGGCTACACGCCACACCAGGACCGGCTAACCAGATCTCGAGAGTGCCTACGAA  
GAAAGTCTGCTGGCAGACTGCGCCGACGCTGATCCACCGAGACATCGGCAGAGCCC  
GTCACCCCTGGCAACGGCCGTCGTCTCTGAGAGAAACCCACTTGGAGTGTGGCGTCC  
CCGTCGCCTAGCAACCAAACCTCCGGGGCTCCAGCCAGGATCTAACAGCGCTCCGCT  
ACTCAAAGTAGGCAACTCTATCCTTTGCTCCGAACTGGGTTGATGTCGGAATAATAC  
TAATCCCGATTTAATAATTCTCCACCGTTACGAATAAATGCTATACACATATCTAAA  
TCCATTCTCTTTCACCATCGCCCAAATCACTGCTAGTTCAGCTGGTAGATATAGTTAT

TATTAGTTATAGATTCATGTCATTATCCTTGTTTCATTTTACTGTGTTTAGTTAGTCAAT  
AAATATTATCAACGTAACCCAGTCGTTGCCTGTGTTTCTTTGAGGTGAAGATCGGAG  
ATCCCTGTAATCGAGAAATCACAACCTTTGGATGTGAGATTGATCAAAACAATCTGTA  
CTTTAATCAAATTGTCCTCCCTGAGGACTGGTGCCCCATTCTTTAACGAGAGCAAA  
ATTCAAATTGTGGTATTCACGCTACATATAATTGGTGCCCCGTGTGAGGCGATTTCAA  
ATTACCGTTCTTCACTACAAAGAAACCTGTTGAATGCTGAGAGTGGCCTC

> Loki-Sri consensus sequence 3'LTR

TGGTGGACGCCAGTGACCAGACACCAGATTTATGGTAAGGACACTGGGGTGCTCTG  
GAGGATATGGGGAGCCTCCCATGTCCACTTTCCCATCATCAAACCATCACATGGATA  
GAAAACAGGGACGAAATGAGTTCCCCTCACCAATAGACTAGCTTTTGAAGATACCA  
TCGGAATTTATGGCTAGCTCATCGAACTCATTCTGAACCAACACTCCTGCACCAAAT  
GGGAGACAAACACAACACTCTCCCCACAGACTGACAATGAATTCATGTTTCATCCCTG  
ACACTCATCCGGGATTGATAGGAGGGTGCCACCTCTTATCAAATAACATGAAAAGG  
AACATTTAGCCATCAAGGTGCTAAACCACCAGGATTCACACTCCTGGTTCATCTTCT  
CTCACAAGAGAAAACAACACTCTCACCTTTAACACCCTTTCTTACCCAAAGGGGGGT  
CTCACGAGGAACCACAGACCCCGCCATAAAACCATCCTACATTCCAAGCCGGATT  
GATGAACTATTCCACATTTTATAAAGCATGATTGAAATGTCATTGAACCAAACGTCC  
TATCACCAGGTAATTCATGCAGTATTACTCTGGAAAGATTTCAACTAAGTATGATCC  
GAAGTTCATTTCTGTAGCCACATGGAGGCTGAGATAGGTTTTATTAGTTCTAAGGT  
AAATATCCACCATGTTACAATACTGCCATCTAAGGACCAGACTGGACCCCTTTTTCC  
CTTAGGGAATTAAGAAATAGACAAACTTAATGCATCACTCTGACATTACTGTTTTAT  
ATTGTAACCTAGCTATATAATTTGTGTGGTTACAAATTGTTATCCTTTCATTGATCTAT  
GTATTCTATGTGTGTTGTTAAACATGATGATTTTATTAGTTATCTTGTATATTCCAAA  
CTTTAGCTAGGTAGTTGATATAGGCCGTTGTCAAAATGAATGGGCCATGGTGGGAGT  
AGAATATGCAACACTTGCGCGTAAAACCAAATTAACAAATTAACCTAAGGTTTTAT  
TTCTCTCTTTCTTTATTGAAACAAAGAAAGAGAAGGAAGACCAAAGGGGTGGCGAC  
AACTGTCAAGCCCCCCCCAGCTACACACACCCCGAGGATAAAACAGCAGGATCCTC  
CAGGACTCGCTCTTCTCGTTCTTCTTCTTCTCGTTCTTCTTCTTCTTTTACGTCTTC  
TTTTGCATAGCTTCTTTTACAATCCTTCGTCTTACAACCTTTTCTTACAATCTTAACTCT  
TACGCCTCGTTTCGCGCACTAGCTCACGTTCTGTTTCTAGCTTAAACTTTACTTCTTAC  
ACTTTGGTGCAGGATTTTGCCTTACTATTTCAACAAGCCAAGCCTTCCAAATTGAAT  
CACACACAGGTGTGTATAAGTAATTTGTGCGTTTTCTTTTTGTGACAAAATCCAGCT  
TTTGTCTAGAAGATTTTGAAGTTTTGCGTCGTTTGGCCAACACCAACTCCTTCCAAC  
TTATCTGGCAAATTAAGTCAAATACTAGCGTTTATTCCGCTGTCAACCTCCGGCCCTC  
CGGCTACACGCCACACCAGGACCGGCTAACCAGATCTCGAGAGTGCCTACGAAGAA  
AGTCTGCTGGCAGACTGCGCCGACGCTGATCCACCGAGACATCGGCAGAGCCCCTC  
ACCCCTGGCAACGGCCGTCGTCTCTGAGAGAAACCCACTTGGAGTGTGGCGTCCCCG  
TCGCTAGCAACCAAACCTCCGGGGCTCCAGCCAGGATCTCAACAGCGCTCCGCTACT  
CAAAGTAGGCAACTCTATCCTTTGCTCCGAACTGGGTTGATGTCGGAATAATACTAA  
TCCCGATTTAATAATTCTCCACCGTTACGAATAAATGCTATACACATATCTAAATCC  
ATTCTCTTTCACCATCGCCCAAATCACTGCTAGTTCAGCTGGTAGATATAGTTATTAT  
TAGTTATAGATTCATGTCATTATCCTTGTTTCATTTTACTGTGTTTAGTTAGTCAATAA  
ATATTATCAACGTAACCCAGTCGTTGCCTGTGTTTCTTTGAGGTGAAGATCGGAGAT  
CCCTGTAATCGAGAAATCACAACCTTTGGATGTGAGATTGATCAAAACAATCTGTACT  
TTAATCAAATTGTCCTCCCTGAGGACTGGTGCCCCATTCTTTAACGAGAGCAAAAT  
TCAAATTGTGGTATTCACGCTACA

> Loki-Sri consensus sequence *smc-gag-pol* gene

CTGCTTACTGAACTGACGCTTTCCTCTCCTTTTTCTCACTTCCTGATTTGGAAAGAA  
CCACCCAACCTCAGTAACCTAACCACCAGCATGTCTACACCAGCAAAGTAGACTCG  
GCAGCTGCTGCCACACCTATACCCAGAACCTCAAACCTGAGGACTCCCTTGAGAA  
CTTAGAGAGTGCCTTAGTGGACTTAACGGAGGATGTGCTACCCGGCTATGCCATTCT  
CATCCAAAACACCGCCCCCTTTAGAACTAGAACCAATAATGCTAAACTTAGTCACTGA  
GGCCCTAACTAAACCCCTAAAAGATAAGGCGTTAACCAAATGCTTGGCAACCTGG  
CCATCGTGGTGACAGCCCGACTCAAATACGCAAACGATTTGTTGACACAAGCAGCC  
GATAAACTCAAAGTTCGTGCACAACAGCTTTCACAGTTACAAGAAGGGGCCACATT  
CTTTCAACATCAGCTAAACCGAGCCCACCGAGCCTCGGATGAATCTGAAACACGCA  
TTGAAGAGCTCGCAGCTCGACTTGATGTGGCCCAAGGAAGAGAACTTGAGTTGGAG  
AACAGAAATCAAGAGTTAAAACGGTACTCCAAAACCGCGAACAAGAGTCAACTGA  
ACTTAAAGACCAACTTAATGAGATAAGTAAAGAACGAGATGAATCACATGATCTCC  
TTAAACGGGCAATGGAAGAGATAGATGACGTAAAAGCCAAGAATCAGACCTATGCA  
GATCACCTGCAGGATGATCAGAAACAGATTCAACGGCTACAAGAGCATCTACACGA  
AGCGGAACTCAGGGCCAAGGCATCTCGCCAGCAACAGGAAAGCAAAGAGGCAGAG  
CTTGCATCAGTCAAGAAAGAGCTACAGCAGTCCTTTGAAACAAGACGCATGCAGCA  
AACGGGCCCATATGAAATATTTCCGAAAAAAGATGACGAACCACCCATGAGGGGAA  
CTCAAGGTGACGTCCTACCTCTTTTCTCACCTCTTGTGTCAAATCCTTTTCGACACTGG  
CAAAACGCTTCAAAGCTGGCCACCACGACTTCTTCCCCGGAACCTAGGTTTCCCTC  
AAGCACCCGCACCTCGGGTGTCTCAGATCGAGACCTTGACAAGATTGCTCGCAACTT  
GCCACGCTTTGAACCCACTCCTGGTGGCTCCCAAACATCAGCAGCTACTTGAAGGA  
CATCGACTTCTACCTGCGAAAGTTCCCAAATGCCACGGCTGATGACCGGATATACTT  
GATCAAAGTGACGTCCGGATGTCAGGTGGGTAGGTTCCCTTGAACGACAGACAGACT  
ACGTCAGAAGCAACTACGACCTGCTTTGCCAGGCATTAATAAGGGAATTCTCTGACC  
CTATCTCACAAACAGGTCTAACAGCTGCTATGACCACCAAACAGGGGAGGCATGAG  
TCTCCTCATCAATATTACCACCGTCTTCTTTTGGCTTACTTTGGCAACCGAAACGAAC  
CTGGTATGGAGGAAGACTTGAATTTCAAACCTCTTTCGTACAAAACCTCCATCCTG  
GTACTAGCTGTCACTTAGGTGTCATGGCAAACCCGTACACCTCAACCATCCAACAAC  
TACGTGAGCTTGCTACCCTTGGGTTTGCCAAACAAAAGCAATCCCACTCAAACAGT  
CAGAACCCAACATCGTTCTGACCCTCAACGCCAATGCTCCGCCATGGAGTTAGAAG  
GGGCCCAAGCGGGGAGATACAGGGACCTGCCAACCAAAGCTCCAGAAGCCATCG  
ATTTACAGAAGAACATAAAAGGTACCTACCCCCACACAACCTACCACGAATCCTCAA  
GACCTCCCTGGTCTGGTAAGGGACAAAACCAACAAAAGATACGAGCCACGCCGTAAC  
TCAGTGGATCACCGCCGAAGCAGGTTCCACCCAATCAATGGGAAAATCGTAGAGC  
GCGTGATGACCAGGGACAGCATCGATTCCGGCCCCAAGGTAGATACCCACAAGACA  
GGCGACAAGTACAACACACTCGCCAAGACTCATCCGAAGAAGACACAAAAGCAAAG  
TGGTGACTCACAAAATCTCCACGGAAATCCGACAAGACAGAAGGTAAGAACAAAA  
CCTCTCGTCTAAGCGAGGAAGAGATGGAGACCATCAGGCGCCTCATCCAAAGAATG  
CAGCTGAATAGCAACAAGGCTGATCTCCTATCAATAACCTCAGTAGCCACTGAGGCT  
GGCCCTCAAACAATTTCCCCGACCAACCTGATATGGTGGTTGAAGAATTGTACCTA  
GCCCTAGCTTACCTGAGTCTATGCCACCACAAGACCAGACGCTTTCGACCCACAGAC  
GACAACGCTAACGAATCAGCTCAGGAAAGTAACAAATCGATGCCCCCAAGCGCAGT  
CTTGGTGGTGCAGCTTGACCCCGAAGACAGGTCCCCTTGTGAAGAAGCCTCGGCCAT  
CCAAGTCGAACCACCTGTTCAACAGTTTCTCTGCCACCTTGTGAGAAAGGGGTTGC  
ACGGAAATTCTACATGTCTCTGACGCTTGAAGGAACGCTCAAACACGAAGCACTCCT

TGACACGGCAGCAGACATCACGTTGATGTCATTAACACTTTTCAATAAGCTACAGGG  
AATGGCTCGCCAATCTAACAAAACTTGAACTCCAACCTTGTCTCTGGAGGTCCA  
GCCATACGCTCCCACCGGAACCACACTGACAACCATGTGAGCTATACAACCTGACCAT  
TGGACCCATGACTCTGGTCCATCCGGTGTATGTGTCTCCCTTGAACCTCCATCCCCCTT  
CTCATTGGCAAAGACCTCCTCAATCGATTTGAACCCCTAATCGACTTCAAACGCCTG  
AAGATGTGGGCACAAGTGCAGACAGCCTCTGCCTATTTCTCTTCCCCAAGACACTCAC  
ATACAGTGTTGCGTCCTTGAGACAGAAGGGGTCAACACTTTGGCCCAGCGTGCTCGG  
TCCAACCAACCAGACGTGACTCAGGTCAATGATGACCCCGAAGTGAGGACGGACAC  
CGCCACAATACCAACGTGGCCACCTACAGACTCTCTGATCCAACGAGAGACATTCTT  
GTGTGCATTAATCCCTCAACTAATGCCAACGAATACTGCCCTCAAGTGGTCAATGG  
CATAAGACTTGAAAACACTGACGTTGAGGACGTGACTCTAGCCCTCTGGGGCCGACA  
AATCTGCTATTAGCCAAGAGCTATATAACTCCCTCTTACAAGCAAACCCCACTCTAC  
AGCTTATGAAGAAAACCTTTTCGTTTTCCCTCAGACCCTACGCCACAGACTATGCTCA  
CAGCAGAAGGTGTCTGCGCCTTGAAGCTACAGTGGAATCGGAGGGAGCTCAAACAT  
TTCTTCCTGGTCATCCCAGACCTACCACATCCTACCTGCATAGGCAGCGACATTCTG  
GTTAGGCTGGGTGCACAACCTGGACACTGTCAACCATGTTTTGTGGTCACTCACCGGA  
GCTCGAAACGACTCAAGCTGCCCTGACCCTGAGAACATGAAGTCGGGACAAACCAT  
CCCCGACGCCTGTCAGATAAGTAATGAACATCACGTAACGGTACCACCATACACCA  
AAAACGTGTCAGTACGCGTACACCTGCGAACAGGTCAACGGCTTAATCACCCACAG  
GCACTCTTCAACCATCTCCCCTTTTCTTCGAAATGGGACTCTCCTTGGAAGCCACTC  
CCTTACTAGAGCTATGCTCCAGGTCAACTTACTTGTGGTTCAAATACCACCGCAG  
AGACCATACTGATTCCCAGGTCCACACCACTAGGGTGGCTTATCAGTACAGAGTTCC  
ACGATTTTGAGTTAGGAATCCCAGTTATTGGGCGTATACCCCCTCCTCTACTCCCTGA  
CAACTCAGACGTGCAGGTGGTATACACTAAACCATCAAAAGCGATCGCGATCTTCC  
CAGTCATGGCGTTTGAACACGACTCCATCGGACGTGTTGATCTCACGGAGGATAATC  
AAATGTTGCTTCAGAGTATCAACGTTTTATCTCTGGATGTAACGTCAGAGACAGCCC  
CTACACCACCTCAATCAGACATCCAAAACGAACCTGGAGAGGCGCACTGGAACAG  
ACAACCGAGCCACGCTCGGACTTCATGGCTCAAATAGACCAGGTGGTGACAGAAGC  
CGACGCACTGGACTGTGAAGAAGAACGCCAAAAACTCCGCAACATACTCCTGAAAT  
ACCAAACATCCTTCGCTGAGGACTCTCTTGACTGCGGACTCACCACCATCCACTCAG  
TGCGCATCCCCACTCCACCTAATGCACCACCAACCTTTGTACGACAATATAAGATTC  
CTTTAGCATCGTATGAACCTGTACAGGAAATCATAGACAACCTGCTAGAGAAAGGA  
ATCATCCGCCCTTGTAACAGCACCTACTCAGCACCGCTCTGGCCAGTGCTTAAACCC  
AACGGCAAATGGCGGCTGACCATCGACTACCGTAAACTTAACCAACAGGTGCCTCT  
GTCTAGATGGCCTATGACACAGCTTGAACAAGAGCTCCCTAAAATCAGGGATGCCA  
AGTACTTCTCCACGCTTGACATCGCATCAGGATTCTGGACAATCCCAGTACATGTTG  
CCGACCAGCACAACTGGCATTCACTTTCGCAAATCGACAATACACCTTACCAGGT  
GCCCCGTTTGGCTACGCCAACTCACCTGCTGAATTC AACATCTTCTTAAACAAAGCGT  
GCCCTGATGCTAACGACAGGGGCACACTCATCTATGTTGATGACATCCTCATGAGAA  
GTTCTACTCTGGACACGCATCTGGAGGAAATTGATCATGTCCTGGAGCAGCTCACAG  
CCGCTGGCGCGAAGATATCACTCTCCAAATGCCAATGGTGTAAAACCAAAGTGAAC  
TATGTTGGCCTCCTGGTAGGACCACGGGGGTTGAGCCACAGATAAATCGTGTACA  
AGGAGTCACAAACATCAAAGCACCAACGAATGTCTCTGAACTTCGTAGCTTCTTGGG  
GGTATGCAACTACTCCCGCCAATTCATTGAAAACACTACGCTGACTTGGCCAAGCCATT  
AACAGAACTCCTTCGAAAAGATGCGCTATTTGTCTGGAACGATTCACAACAACAGG  
CAATGCAGGCCCTTAAAGAAAAACTTTGCACGGCTCCTTGCTTGGCCTATCCGAACT

GCAACAAAGAGTACCACTTGGAAGTGGGATTCTCTAACCATTGCTTGAGCGCAGGC  
CTTTACCAAAAGCATGACCTCGACAAACGCGTTGTTGCATATGCCAGCAAACTCTG  
TCACCCCTGAACTTAAGTACACTGACTGTGAAAAAGCTCTCTTAGCGACGGTGTGG  
GCAGTCAAACACTTCTCCAACATCTTGCGGACAAAAAGTGATTGTGGAAACCCAC  
CACCAGCCAGTAACCTTCCCTCAACAGTCAGCGACTCAGAGATGGCGTAGTCACTAAT  
GCACGCGTAGCGTCGTGGCTGATGGCCCTACAAAGCTTTAATATGGAGGTGCGCTAC  
GCTCAAAACCACAAAACACCCTTGGGCACAGGACTGGCAGCCTGCCAACGGTGTTC  
AGACGACTCCCCGACCAGCGTAGCACCAGTCTGCGAACTGCCACCTCCAACACCTCC  
ACGCCACCACTACTTTGACCAAAACATATGCAAAGAGATGACAACGGCATACTGTGG  
ATGGCTGCTCTTTCCACCATGAAACTCAGATCCGTGCAGGCGTGGGAGTTGTGTGGG  
TCCATGACACCCCATATAAACCCAGATGTTCAAACCTGGGCTCCCAGTCTTCCCAGT  
ATGCTGAAATTGCTGGCATCCTGATCACGCTGCAACTGGCTGTAGAAAAAGAAATC  
AAAACGCTGGTAATCTGCACCGACTCCAACATATGCGCGACTCAGCTTCTCTTGCCAC  
CTTCCCCTCTGGCAACGCAATGGCTTCATAACTTCCAACAGGAAACCAGTCAAGCAC  
AAAGAGTTGTTTCGTGGCCTGCAACCACCTCGTGGACACACAAGACATGCAGGTCTA  
CTGGAAAAAGGTCAGGGGCCACTCCCCTGTTCCCGGGCAAGACAAAGAACTGAACG  
ACCTAACTGACACACTTGCTAAACGTGGCGCTGTTGAAGGCACGCCGTGGTCACTGG  
AACCAGAACCTGTGCCTGAGCCGGATTCCCTTGCCCTCCCACCCACCCCTAGCATCT  
GTGTCATCACTCGGTCTCATGCGGCCACTTCAGCGCTGCCACGCCCAACTGACATAA  
CCACTGCCTCTGTCCGTCCGGCTTTCTCTGATTTCGGACCTCATCTCACTGCAAGCGCT  
TGATCCAGCAATCAATAACAATGATTGGCCACCTAACCGACCCAACCTGCTCGGTTGAT  
CACAAGCGATGAACTTGCCCAACTACCAGACCTGAAGATCCTCTTCAACGGACGTG  
CGTCCCTGCGCCTGCTCAAAGGCATCCTGGTTTATGCTTCCGATGCGCTCACTTCACC  
TGTGTTTCGTGGTACCTCGTAACCACAGGGGGGTGATGCTAATGCATGCCACGACTC  
CCATGCGCAGGACACAAAGGCTCCAAAGCGACATAACAATGCACTCAGGCAGGTGCG  
CCTACTGGCCACAAATGCGAAAAGATGTGGCTGACTACATCAAAGGCTGCTTAGTCT  
GCTGCCAGTTTCAACCAGCCAATCCTGTGCACAGAGCCCCCTTACAGCGAAGAGGC  
ATTTCCCTTCCCCTGGTCCGACCTCCAAATCGACTGGGTTGGACCTCTGACCAAATCA  
ACCAGAGGCAACAAATACTCCCTCACGGTCACATGCGCATTCACTAAATGGCTCGA  
GTGCTTACCAGCCCCAAACGACACAGCTCAAACAACCGCATACTACTGATGAACC  
ACATCTTCTCCAGGTTTCGGTCTGCCGAGCCGCGTCAACTCGGACCCGGGGCACACATT  
TCACTGCGGATGTAATGCAAGAACTCTGGCAGATACTCGGTGTGAAGGCCAACTTCC  
ACATCAGCCATCATCCCCAAGCCTCTGGTCAGGTAGAACGAGCTAATCGAACCGTG  
GTTAGCGTTCTAAAGAAGTACGTGACTTCAAACCACAGGGACTGGGATGTGAAACT  
GCCGCTGGTCTTAATGGCCATCAGAGCAACACCGCATGAAGCAACGGGGTTTTTCGC  
CATTTGAAATGATGACAGGCCGACAAATGACACTCCCCTGACCTGCTTTACCAAC  
CAGGTGAAGCTAGCGTTGCAACAGCATAACAACCCACCAGTACATGACGGACTTG  
AACCAACACCTTCAAGCCACCTTCGCCTTTGCCCAAAAACACCTGGACAAAAGCGC  
AGAAGGACGTAAGGCCTACTATGACCAAAAGGCTTCACATGAAGAACTCCAAGTGG  
GGGACAAGGTGTGGTACTACAATTTCTTCCAACCAACAGGTCAAACCAACCCAAGC  
ACGGGAAGGCTCGCCCGAAAGCTCCTCCCTCGGTGGGCGGTCCCTACCTGATCACA  
GACAAGCTTTCCCCCGTTGTGTACCAAATCAAGGTTAGCAAGGGCCAGAAAGAACC  
GACCCTCAAATGGGTCCACCGCAACCAGATCAAACCACATAAGACCCCCATGGGAT  
ATACAGGGGACGACAGCACCCAGTCAGGTCATAA

> Loki-Sri consensus sequence Smc-Gag-Pol polyprotein

LLTELTLSLSFFSLPDLERTTQLSNLTTSMSSTPSKVDSAAAATPIPRTSKPEDSLENLESAL  
VDLTEDVLPGYAILIQNTAPLELEPIMLNLVTEALTKPLKDKALTKMLGNLAIVVTARLK  
YANDLLTQAADKLVRAQQLSQLQEGATFFQHQLNRAHRASDESETRIEELAARLDVA  
QGRELELENRNQELKRLQNREQESTELKDQLNEISKERDESHDLLKRAMEEIDDVKAK  
NQTYADHLQDDQKQIQRLQEHLHEAELRAKASRQQQESKEAELASVKKELQQSFETR  
MQQTGPYEIFRKKDDEPPMRGTQGDVLPFLSPLVSNPFDTGKTLPLKATTTSSPEPRFPSS  
TRTSGVSDRDLDKIARNLPRFEPTPGGSQNISSYLKIDIFYLRKFPNATADDRIYLIKVTS  
GCQVGRFLERQTDYVRSNYDLLCQALIREFSDPISQTGLTAAMTTKQGRHESPHQYYHR  
LLAYFGNRNEPGMEEDLNFKTLFVQNLHPGTSCHLGVMANPYTSTIQQRELATLGFA  
KQKQSHSKQSEPNIVLTLNANAPMELEGAPSGEIQGPANQSSRSRHFTEEHKRYLPPHN  
YHESSRPPWSGKGQNQQRYEPRRNSVDHRRSRFPNQQWENRRARDDQGQHRFRPQGR  
YPQDRRQVQHTRQDSSEEDTKQSGDSQKSPRKSDEGKNTSRLSEEEMETIRRLIQR  
MQLNSNKADLLSITSVATEAGPQNNSPDQPDMMVVEELYLAPSLPESMPQDQTLSTPDD  
NANESAQESNKSMPPSAVLVVQLDPEDRSPCEEASAIQVEPPVQQFLCHLDEKGVARKF  
YMSLTLEGTLKHEALLDTAADITLMSLTLFNKLQGMARQSNKNLKLQPCSLEVQPYAPT  
GTTLTMSAIQLTIGPMTLVHPVYVSPNSIPLLIGKDLLNRFEPIDFKRLKMWAQVRQP  
LPISLPQDTHIQCCVLETEGVNTLAQRARSNQPDVTQVNDDEVRTDTATIPTWPPTDSL  
QRETFLCALNPSTNANEYCPQVNGIRLENTDVEDVTLALWADKSAISQELYNLLQAN  
PTLQLMKKTFRFPSPDTPQTMLTAEGVCALKLQWNRRELKHFFLVIPDLPHPTCIGSDIL  
VRLGAQLDVTNHVLSLGTGARNDSSCPDENMKSGQTIPDACQISNEHHVTVPPYTKN  
VSVRVHLRTGQRLNHPQALFQPSPLFFEMGLSLEATPLLELCSRSTYLLVQNTTAETILIP  
RSTPLGWLISTEFHDFELGIPVIGRIPPLPDNSDVQVVYTKPSKAIAIFPVMFAFEHDSIGR  
VDLTEDNQMLLQSINVLSDVTSETAPTPPQSDIQNEPGEATLEQTTEPRSDFMAQIDQV  
VTEADALDCEEERQKLRNILLKYQTSFAEDSLDCGLTTIHSVRIPTPPNAPPTFVRQYKIP  
LASYEPVQEIIDNLEKGIIRPCNSTYSAPLWPVLKPNGKWRLTIDYRKLNNQQVPLSRWP  
MTQLEQELPKIRDAKYFSTLDIASGFWTIPVHVADQHKLAFTFANRQYTFTRCPFGYAN  
SPAEFNIFLNKACPDANDRGTLIYVDDILMRSSTLDTHLEEIDHVLEQLTAAGAKISLSKC  
QWCKTKVNYVGLLVGPRGVEPQINRVQGVNTNIKAPTNVSELRSFLGVCNYSRQFIENYA  
DLAKPLTELLRKDALFVWNDSQQQAMQALKEKLTAPCLAYPNCNKEYHLEVGFNSH  
CLSAGLYQKHDLDRVVAYASKTLPPELKYTDCEKALLATVWAVKHFSNYLGGQKVI  
VETHHQPVTFLNSQRLRDGVVTNARVASWLMALQSFNMEVRYAQNHKTPPLGTGLAAC  
QRCSDDSPTSVAPVCELPPPTPPRHYYFDQNICKEMTTAYVDGCSFHHETQIRAGVGVV  
WVHDTYPYKPMFKLGSQSSQYAEIAGILITLQLAVEKEIKTLVICTDSNYARLSFSCHLPL  
WQRNGFITSNRKPVKHKELFVACNHLVDTQDMQVYWKKVRGHSRVPQGDKELNDLT  
DTLAKRGAVEGTPWSLEPEPVPEPDSLALPPTPSICVITRSHAATSALPRPTDITTA SVRPA  
FSDSDLISLQALDPAINTMIGHLTDPTARLITSDELAQLPDLKILFNGRASLRLKLGILVYA  
SDALTSPVFVPRNHRGVMMLMAHADSPCAGHKGSKATYNALRQVAYWPQMRKDVAD  
YIKGCLVCCQFQPANPVHRAPLQRRGISFPWSDLQIDWVGPLTKSTRGNKYSLTVTCAF  
TKWLECLPAPNDTAQTTAYLLMNHIFSRFGLPSRVNSDRGTHFTADVMQELWQILGVK  
ANFHISHHPQASGQVERANRTVVSVLKKYVTSNHRDWDVKLPLVLMAIRATPHEATGF  
SPFEMMTGRQMTLPLHLLYQPGEASVATAYTTHQYMTDLNQHLQATFAFAQKHLDKS  
AEGRKAYYDQKASHEELQVGDKVWYYNFFQPTGQTNPSTGRLARKLLPRWAGPYLIT  
DKLSPVVYQIKVSKGQKEPTLKWVHRNQIKPHKTPMGYTGDDSTPVRS\*

> Loki-Sri consensus sequence *env* gene

CTGTGTGTTTTTCCCATCAGGATGACGTGGCTGCTGCTCGCCATCGTGACTCTCGGGA  
TGATAACTACCCCGGCGAACCCCGAGACCGTCTGAACCTGGGCCTAACTCGGGGATT

GTTCTAAAGGAACAACCAGGACTTCTAATCACAAATTGTCGTCTACACACCCAGAAA  
GTGTTTCGTTAGATTCAACCCTGAGATGGTTTGGCCCGAAATGTCCCCACACAGCC  
AAACTAACCTCTTGGGCTGGCATTTCGCTGGAACAAGGAGTTATAACCCACGCAGA  
GGTAGACATAACCCACATGCTGCAACAGCTTCAGAAATTCACCATCACTCGGTCTGA  
ATTAAGCGGTGCCAACAAAAGAGAGAAGCGGTTTCATTGGAGGCTTGCTAACCGCAG  
CTGCTGCTCTCGGCTCTCTCTTTAGTCTAGGGGTCTCCTCAGTTAATGCTGTAAACAT  
TGCCGCTGTCAAACGACACATGGGGGAGCTGCAGGCTGAAATCCCCGGGATTGAGG  
AACAAATGGTAAAACAACAAGCACAGCTAAAAACTATTGGGAAGACGTTGCAGGG  
AACAGTCCTAGTACTTAACACTCACAGTGAACCTTGCTCAAGACTTTAGGAGCGGT  
AGACCTGTTACTGTCAGTCCTGCAGGCAGACTATGCTCACACACAACCTGGTGACTAT  
GCTAATGTCCGACATGCTTAGGGATATTGGGTCATCAATTGATAGTCTAGCTATAGG  
TAGGATCCCTCCCTACCTGGTTCCACTCTCCCTGGTACAGGACATCCTTGCCACTGCC  
ACTCGAGACATAGTGACACCACTACAGGCTCATTTAGCTTACACCCTAGGTAGCTCA  
GTACCAATCTATGTAGACCCAGAGGCCAGAGAAGTAGCCTTTATTATAAATCTACCC  
ATAGTGACACCTGAGAACATCTACAGACTGAAGGACGTAGTTAATGTTGGCTCTTG  
CAGGGTGAAACGCACGTCAAAGTGCACACACCACCCGTTGTGGCATAACCACGACAG  
CAACCCTGACTTATACCTTGCTCCCAACCTCCGCATGTGTACACTGACAAAAGACAT  
CCACTACCTCTGCCCCAGCAAACCATTCGTACGTGATAACACAGGTGGTATCTGCGG  
CATTCAAACCATGTCTAAAGACTCTCAATGCCCAACAACAGTCACGCCCTCTACCA  
AATGACTACGACTCAGGCAGAAATAGTGGGAAGTCGCTGGTTAGTTAACACCCAG  
CGAAAATAGCAACTCTCACTTATGACCGACACGACACCTCCACCCGTATCGAACTAC  
CTCACCCGACCCCTGTGGGTTACCATGCCTGAGGGTGCCATCTTTCACATAGACGACT  
TAGCCCTCTACCATCTAAACCCTGACCAGTATGAGAGTAACATTGAGGTGTCCGACT  
TCTTCAAACAAACATGCCCTCGAGTTGGATTCCGAGACCCTAACCCAAAGTCCAATACG  
AGGGAACCTCAGACCATAGACGTCGGCCCTGTTGACAACGTTCTAAAAGAAATTGCC  
TCCAGACCCATACTCCTAGCCAGCCTTTAACCTATGCCTGGTCTACTCCAGACACT  
GCCATAGCCGCCCTTGTGGCTTAGGATACATCCTGACCTTTGGTTTGACGTGCCTAT  
ACATCAGGCGCATGAAAACCTTGGCAGTGTACGTCAGTATCAGGGTCTGGACAGACTG  
AACAGAGGAATAAGAATGAGGAAAAGAGAAACGAAACCAACCACTAATGACCTAG  
TGACTGTTGACGATGAGACAACCTTCACCCGAAACCCTTCCAGTGGCCCTGCCATCC  
TGGAACCTATTATGCGACTAG

> Loki-Sri consensus sequence Env protein

LCVFPIRMTWLLLAIIVTLGMITTPANPETVEPGPNSGIVLKEQPGLLITNCRLLHTQKVFVR  
FNPEMVCRRNVPTTAKLTSWAGIRWNKEVITHAEVDITHMLQQLQKFTITRSELSGANK  
REKRFIGGLLTAAAALGSLFSLGVSSVNAVNIAAVKRHMGEAQAEIPGIQEQMVKQQAQ  
LKTIGKTLQGTVLVLNTHSETLLKTLGAVDLLLSVLQADYAHTQLVTMLMSDMLRDIG  
SSIDSLAIGRIPPYLVPVSLVQDILATATRDIVTPLQAHLAYTLGSSVPIYVDPEAREVAFII  
NLPVTPENIYRLKDVVNVGSWQGETHVKVHTPPVVAYHDSNPDLYLAPNLRMCTLTK  
DIHYLCPSKPFVRDNTGGICGIQTMSKDSQCPTTVTPLYQMTTQAEIVGSRWLVNTPAK  
IATLTYDRHDTSTRIELPHRTLWVTMPEGAIHDDLALYHLNPDQYESNIEVSDFFNKH  
ALELDSETLTQVQYEGTQTIDVGPVDNLKEIASQHTPSQPLTYAWSTPDTAIAALVGL  
GYILTFGLTCLYIRRMKTWQCHVDQGLDRLNRGIRMRKRETKPTTNDLVTVDDETTFT  
NPSSGPAILELLCD\*

> Loki-Ofa consensus sequence

AAGTGTTTCAGCGTTCCACACTTAACATTTTCACCATTATGAGTACACCATCCGGGTA  
CTCATAGTGCCTGACTGATTTTGGCATAATTGTCAGTGTGAACACACTTATGCACTCAA



AACAGCGAGTGTAAGTACGGAAGAACAATTTGAGACACAGCACAAGACTCTAGA  
ACCATATTTTGCAAAGGTACAAGGATTCATTTTGCTGTACCACTTTTTGGTGTGACCA  
GGCCAATGTTGCCAACTCTTTACCAGTGAAAGTAGCTAGCACTAGCTCAAAAAGTTG  
CTTGTATATTTGAAGTTAAAAAGTTTAAAGAAAAAATGTATGAAGGAGGGAGAAGG  
TCAAACAAACTATTTACATATTTACAAGTTTTAGGAACACCCTAACCCAGAGATCCA  
TAAAGAAAAAGTATTTATATACGGAATAATTATTCTATATCGTGGTATGAAAGCTT  
AGAGCATACTATAGCACACCACTTTCTCGCGTTTTGAAAAGTTATGTTGGGACCTCA  
CCACGTGGGTGAACAAAGGAGAGGCCTACATGTAAAGACAAAAGCCTGAAACAAT  
GAAACGGCGCCAATCCCATCAGGCCTTGCACTTCACACCTTGGTGTGAAGTTTGGT  
TTAAATTCAAACACTGGTGTTCATTGGATGAAACTCACGGGAACCCAGGGAGTCC  
CCGTGACGCGGCCATGACGTCACCAGGAATATAATAACCGGCCCGCACCTCTGCAC  
GGGGCCGTCCGCTGTGACCCCGAGTCCGACAGGAGGTGACCCAAACGTTTTGTATTT  
AACTAGCCGAGGCAACAGTCCCTAACTCGCTGGCCGAGAGCAGACTGTTTTATTTTG  
TTTTTGTTTTTTTTGTTTTACATCCGGACCCGGAAACAGATCGCCTGCAACGAGCCGAT  
CTTGTTCATTACCTGCAGAAGGAAGAAACATTCTTCAAGAAAGAGAAGGATAACTT  
CTACGCCCCGCTCTCTTTCAATTAAGTCGACTCTCGCTGTTTCCTCCGCTGCCATAC  
GAGGACCAGCTGATTCGCCGTTCAACCCTCCACAAAGTGAGGTAACGGCTCCGTCAT  
NTGTTTCGAGTAGCAGTTTAGCACACTATTTGGTTTTGAGATCTGTAAGGCAGCCTAA  
CACAGCTATTACTCATCAGAGGGACCGAGGTCACCTACTAACATCCTAACAGGAT  
AAGCTATACGAGAGTAATAGGCACCTAACACATTGTAAGCCACAGGTTGAAGCCTC  
TCGCCTGTGCAAACGCTTTTGTATTGCAGCAACTTTTCAGTCACGACAAGTGATTAG  
AACCACTGGGTGTCGCCCTTTTACTAGAAAAGTAAAATGAGTAGCCAAGACCCCCGT  
AGATCAGGAGTTGAAGCTCCCCAGGAGTCAGACGATCTATCCCTGCAGGATGCGGT  
CGCTGGCTCCTCCACCTCTCTGTAGAGGACCGAAGTAACCTCGACAGCTACACTGT  
TGACGCATGTAATGAGAAATTGAAGGAGCTGGTGGCTTATGTCAATCACCCGGCCG  
GGAAGCCACAGCGCACCATCTCTGACGTGCTTGGTGAATACTTCTCCTCTCTCAGC  
GCAAAGCCCGACTGCAAGCTGCAGAGCATAAGGTGCAGCTTGCCCAGCTGCAGCGG  
AGCAATGCCAGCCTGCGACAGGAAGTCCAGGCCGCACAACTGAGATCTCCAGAT  
ACAGGATGATCATGATCAGCTGCAGGGGTATGCAGAAACCCTGCATGCGCAGCTCC  
AGACTGCCCAACAAAAACAGAGGTCAGGCGTGAAGAACAGATCGGCCAGGTAAG  
TACCGTTGCCGACCCCTTCGCCCAAGAGTCACTTGAAGATGCCCTGACCTTGAAGC  
GGCTCCTCCTCAGGTCGCAGTCAGCCGACCCGTGCTCATAAGAGCACAGCCGACCTG  
GACGAGTCTGACCGACTGCGCTCAGAACTTCATGCCGCCCGCANTGAGAGAAACAG  
CCCTGCTCCAGAGACTTGAGGTTGCCCGACCGAGTGACCAAACCACTCCGGCCAAC  
CCAGGAGCCATGACTGGGAACCTTAGCGGCCACAGCAGCGCGTTCTCTGAGCTGGT  
CACAGTTGACAGCTATCAAGCACCTCTATCGGCCCGCTCATTGACATGGGTGCTCC  
ACCTCCCTTTAGCCGCCCTACCTTGCCTACTGACAGGAGGGGATTCCCTCCCTCCG  
GGGTGGGGATTACTCCCAAGTCCCGAGCGGCATAAGTGGTTTTAAGCCCTCATCCAC  
TAGCGAGCAATATACATCGCGCAGCTCGCGCCTGCGCCTCAATAGGACTCCATCCCC  
ACCGCAAAGGGGGGAAGTCATCCTCACCGTTATATTGCATTGAGTGACCATGGGA  
CGTCAGATGACTCAGACGGCCCATGGCCGACCGAGAACAAGGCCTACGTACTCGC  
CAGGTCGAGTCCCTCGCCAGGGATGTAGAGCGCTTCGACCCGGGCAATCGAGAGTC  
AAACATCAATGACTACCTCAGAGAAGTAGAGCGTTGTCTCCTTGACCTACCTCACGC  
TTTGTACGTGAGAACTGAAGCTTATCTGGAAGACCACGGCTAGGAGCGTCCATGT  
CTTCATGGAAACGCTCCACCTGGGACCAGAGACCGCTACTCAGCACTCTGCAAGG  
CCCTACGGGAGGAGTACTCATTGTACACCGACCGAGCTTCCGCCACTCTCGGCGCCT

TCGCAATCATGCAAAAAGAAGCATGAACCTCCAAGGGAGTATTATAGGCGTCTGAGA  
GCTGCGTACTTCCTGGGACGTAATGCCCCAGGCCTGGAGGAGGATCAGGCTTTCAAG  
TCCCTGTTCTCCACAACCTCCACGAGAGTGTGCGCTATGATATAACTATGCACTGC  
AGGACGCATGATCTCACCATGCCGGAGATCAGGAAATATGCGCAGATGGCATGGGA  
GACACGTGCACGCCCTGTTAGGAGGTACGAAGACGACGCCAGGGTCCTTGGGATCC  
AAGCCTCGGCAAACACAGACTTAGCGCTAGAAGGTGACGAAATCCCTCGCGTTAAG  
ACAAACACCAGAGCAGTACCTCAGGGTTCGACGGCCATTTCCGCAAACAGAACTGGCA  
ACAGAACCAAGGGGGTGGAGAGACAGCATTACTCCAAAACAGGTCAGGCCTCGAC  
AACCAAACACCCCTCAACCAGGAAGGCAAGGTTGGTTCGAGAGAAACCTTAAGCAA  
GGAGGTAAGTATGATGGTAAGATCCCAAACAAACAGAAAGGAGATGGTTCTAAGCA  
GGACATGGAGAGCCTGATTCGGAAATGCTTGGCGGAGGCAATGAAACAGCTCGAGA  
CATCCCGTCATTCACCAATGACGCCGGACCCTTCAAAGGGACCTGATACCAAACCC  
CGCCCTTATGACTAGGCCCGGCGACCTTCTCTTCGACCGCCAAGGTCTACTTTGTCTG  
GTTGGGGAAGAGAAACAAAGGAGCCCAGGACATTCCCCGAAACAGCCACTCCTCTC  
CCTTTACACACTCCTTTCTTGACCTTCTTAGGTGATCTCATCCGCAAGGGCAACGCC  
AACGGATATACACCTCAGTAGTAGTAGGGGGGTGTGTCAGCACCCCTCGCCCTGCTAG  
ACTCTGGTTCTGAAATAAGCTTGATGTGTTCCAGTACCTTCGCTGAGGTCGCCAGAG  
CGATGCTCTCCCTCGGCAAGCCGTTACAAGTCGAGACCTGTAACGTCAACATCACCA  
GCTACACACAAGATAAATCACCCATCACGAAACGTGCTTGGTTTGATATTTCCCTTCC  
AGGAGATGACACTAGCGCATCCCATCTACATCTGTATCCTCGATACAGAACCTTTAC  
TTATCGGTCAGGACCTCTTGGACCGACTGGCCCCACTCATTGACTGCCACCGTGGAC  
ATATGTGGGCTCAGGTTGACACCCCAAAGCCTCTTGGCTCCATGGGCTGTCCGCCAG  
CTCTGAACGGACAAGTCGCCGTTATCCAAGAGTCCAGAGGACCCGTACCGATGCTC  
ATGCCCTCTCCAGAGCCTGATCCTGACTCTGAGCCTTCTATGCCACTGGCAAGCTCA  
CAACCGCTGCAGATTGGAATGCAAACCTCCTTCCACGCTCACGAGTCTTTCCCTTGC  
TCGCTGAGAAACACAACTCAGCACTATACAGCCCCATGTGGTTGGAGGCATACA  
CCTCAATGGCATTACGGCTCCAGAGGTAATACTAGCGCTCTGGTCTGAGAAGTCTGC  
CGTCAGCCAAGACCTGTACAACAGCCTGAGTCAGCGCAACCCTCGTTTGGCTTTTGT  
GCAAAGAAGCCACCGCCTTCTTTCTGCAGATTCACCACAGACTCTCCTCAAGGCAAT  
TGGGGTATGCGTTCTCTCCATACAGATTGGAAAAACAAGTCACTCACTTTGTGAG  
TGTTGTTCTCGACTCCACCCCCATTCTCTATAGGGGCGGATCTTCTTGTGAGGCTC  
GGCGCCAGCTGGACACGGTGAACCAAATCCTGTGGTTCGACGGCCAACACAAAGGA  
CTACCCCTTAACCACCGAGCCAGAACACATGCTATCAGGGCAGACCATCCCTCAGG  
CATGCCAGGTCGCCAGTGAAGTCGACGTGACTGTTCTGACGAACAGCAGGGGTT  
CCCATTGCTTGCATCCTTAAGGGACAGAAGATGCCTGACCTGCAGGCATTCTTC  
CAACCTCTACCCCATTTCTGGGAACCTCAACCTGACAGTCTGCGGTACACCCCTGCTT  
GAGTTGAACAATCGTTCAACCTATTTACTGGTTCAGAACCTGACGCACGTCCCAATT  
CAGGTGAGGGCACGGCAACCACTAGGGATGCTGGTTCGACAGCTCTTCCACGACTTT  
GAACTGACAGTGCCTGTCATAGGAGATCTGCCCCATCCTTAGCCAGGGATGACAA  
CCTGGACAATGCCCTTTTCACTTTTCCGACCAAATGACCACCATTGCCCGTCACGA  
AATGCTACAGAACGAAGCGATCTGCGGCACCGCCCTGGGCACTGAAGGTGACATGG  
TCGTGTACGCTCTCGTACTCAGCCAGGAGACACGACCTCAGGTAGCAACGGAACC  
CGTTCCTCACCAGAGGAACCGTACCCCGGCTTTGAGTCCGAAATTGAGCAGCAGCTT  
GCCAAAGCAAATGCTCTGACAACAGAGTACCAGAGAGATGCACTTCGGAAGTTATT  
CCGTGATTTCCAGTCTATCTTCTCGAGGGACTCTAACGACTGTGGAGTCACTGACCTT  
CACACTGTTGTCATTCCCACTGACCCAGAAACACCACCGTCATTTGTACGCCAGTAC

AGAATCCCGTTGGCTGCCTATGAGTCGATCCAAGAGATACTCGATAACTTGCTGCAG  
AAGCAAATTATCAGGGGAATGTA ACTCAACCTACA ACTCGCCAATCTGGCCGGTGTTA  
AAACCAACTGGTAAGTGGCGCCTAAC AATTGACTACCGCCCTTTGAACAAACAAGTT  
CCACTTTCACGCTGGCCCATGATCCACCTGGATCAAGAACTGGCCAAGGTAAAAGG  
GGCCTGCTTCTTCTCAACGGTGGATGTGGCCAATGGTTTCTGGACCATGAGAGTCAA  
TCCGGCTGACCAATAACAAGCTGGCTTTCTCCTTTGGCAACCGCCAGTTCACCTGGAA  
CCGTTGCCCATTTGGATACTCGAACTCCCCAGCTGAGTTCAACATTTTCTCCTCCACAA  
AGCGATGAGTGATGCCGCTGCCCGCGGGAATCTCATTTACGTGGATGACATCCTCAT  
GAGGAGTCGAACCTTGNAAGAACACCTGGCAGAGATCCGTCATGTCTCAACCAAC  
TTTCTGCCGCCGGAGCCAACTGGCCATCGCCAAGGGCCAATGGTGCCGTACCAAG  
GTGGAATATGTGGGTTTGACAGTGGGTGCTGATGGCATCGAACCCAGGCTGGGAG  
GATTCGAGCCATCCAAGACATCAAAGCCCCGACGGGCGTGTCCGAACTCAGGAGCT  
TCCTGGGTGTCTGCAACTACTCCCGACAGTTCATTGAGGACTACGCGGAGATAGCCA  
GACCCCTCACGGAGCTCCTTCGCAAAGACAAGTCCTTTGAGTGGGGAGAACCTCAA  
GAGCAGTCTTCCGCAAAAATGAAGGAGAACTCTGCTCTGCATCTTGTTTGGCTTAC  
CCAGACAAGGACAAAGAGTTCCACCTTGAGGCAAGTTTCTCTCCCCACAGCCTCAGT  
GCTGCCTTGGCGCAGAAATACGACACAGACAAGCGGGTCGTCGCCTACGCGAGCCG  
ACCTCTAAGCAGCGTCGAGATTAAATTCTCTGATTGCGAGAAAGCCCTCCTTGCTAC  
CGTCTGGGCTGTAGAACACTTCCGCAGCTACATCGGAGGCCAGAAGGTAATCATCG  
AGACTTGTACCAACCTGTCACTTTCTTGAACAGCCAGCGGCTGAGAGAAGGACGTG  
TATCTAATAGCCGCATCGCCTCCTGGATGATGGCACTGCAAGGCTACGACATCACGG  
TCAAGTATGCTCAGAACCACAAGATGGCCTTGGGCCAGGGCCTGGCCGAATGTCAG  
CATTGCGACTGTGAGGAGCAACCCAACTCCCAGCCCCTTCTCTTAACCACTCCATCG  
CTTCTTCCAATCATCATTATTATGATGAGAACGTTTGTCAAGACCTTCCAAGGGTCT  
ATGTGGATGGCTGCTCGTTCACCATGAAAGCCAGACACGGGCTGGAGTTGGCATTG  
TTTGGGTCAACCACAAGGTTGACGAACCAAACCACTACCAGTTGGGGCCCTAAGACA  
AGTCAGTATGCAGAGATCGCTGCAGTGCTGATCACCTCCAACAAGCTGCCAAGCT  
AGCCATCGTGCAGCTGGTGATCTGCTCCGACTCTAACTACGCTCGTCACAGCTTTATT  
TCCCACTTTCCCGTGTGGAAAGAGAACGGCATGAAAACGCACGGAATAAAGAAGT  
CAAACACTCAGAACTCTTCTTGGCTTGCACCAACTTGTGACGGACCGAGGGATGAC  
CGTGTACTGGAAGAAGGTCAAAGGTCAATCCCAAACCGCAGGTCCCGACAAGGATG  
GTAACGATGAAGCCGACCGCCTAGCCAAGCTAGGTGCGGAACAGGGCACGCCCTGG  
GAGTTCCAGAGTGATTGGCTCCCAATTCCCCAAACGTGTGCAGTGAATGCCATTACC  
CGCCGGCAGGCAAGAGAAAAACGAGAGGACCCTCAAGCCTGCACCCAAACTCTACA  
CCTGGGTCCGCGCACCCAGCGATGCAGATTTAGTTACTATGCAGGAACAAGACCCTG  
CCATTCAAGCCATCCGTCAGTGGATGTTGAACCCTCCACGGCAAGGGGTCTCACAAA  
CCTCACTGGTCGAGTCAGAGGAGCTGCGAACTCTCCGCTCCGACCAGCTTCACCTCA  
AACTGGAAAAGGGTCTGCTCGTCTACACCTACAACGGCCAGGGACCGACCCGTTGG  
GTCGTCCCAACCAACCATAGGGGGGTGATGCTAGCCCACGCTCACGACTCTCCCGTC  
GGAGGCCACCGGGGTTACAGAGCCACTCTCAAACCCTCCAGCAAGTCGCCTATTG  
GCCATTGATGGCTCGTGACACTAAATCCTACGTCCAAGGATGTCTGGTCTGCTGCCA  
GTTCCAGCCGTCGACCTCTGGGTCTGCCCCACTCCAGAAAAGGGGGGTCACATT  
CCCATGGTCTCACCTCCAGGTTGACTGGGTCCGACCAGTCCCCAAGTCATCACGAGG  
AAATAAATATCTTCTCACTGTCACGTGCGCCTTACCAAATGGGTGGAATGCCTCCC  
GGCACCCAACGATACTGCTATGACGACAGCAACCCTCCTGCTGAACCATGTGTTTAG  
CCGCTGGGGGCTACCCCTCTCTGTCGACTCAGATCGAGGCACCCATTTACGTCTAG

TGTCATGACCACCCTGTATGACATCCTGGGAGTGGAAGTAAAATTCCACATCTCGCA  
TCATCCCCAGTCATCCGGCCAGGTCGAACGCGCCAACCGCACCATTTGTTAGCATGCT  
CAAGAAGTATGTCAGCAGCAATGGCAAGGATTGGGATGTGAAACTTCCTTTGGTGCT  
GATGGCCATCAGGTCCACCCCGCACCGCTCCACAGGAGTCACACCCTTTGAAATGAT  
GACTGGAAGAGAGATGACCCTTCCACTACATCTCTTGTATCATCCTGAAGATGTCAG  
TGTTGCAACCGCCTATACGGCGCATCAATATGTGACGGACTTGCGCGACCACCTTCG  
AGCCACGTTTCGCGTGGGCCAGACAACTTGGAGGCCAGCGTTGAAGGATCAAAAG  
CCTACTATGACAGGAAAGCGTCCCACCGCGAGTACCAAGTAGGGCATAAAAATCTTG  
TACTTCAGATTCGCCAAACCGGTAGGAATCTCCAAGAAGTTCCTACCGAGCTGGTCA  
GGCCCGTTCGAGATTGTGGGAAAACCTCTACCGGTAGCTTATCGGATCAGAGTCTCG  
AAACCAAAGCAACCACCAGCATACAAATGGGTCCATGCAAATCAAATTAACCCTA  
CCAGTCATCCTCCCTCTCAAGGGGAGAGGAAGCCTCTACACCCGAAAGGGGGGAGC  
AGTCTTCACTCCAAGAGGGAGAAGACTCAGTCCAGTAAACCCATAGGGATAGCTGC  
ATGCCTCAACTACCCCGTCGGCATGCACTAACTCCTAATACGTTTCATCCCCCTTTTT  
CCCTACAATAATTCAACTCTGGTTTGTTCAGGATGAACTCCTTTGGATCTTCGGCA  
TTCTCATCAGTCTACGAGTACCCTGTCTATGGAAGTGGTGAACCCGGGCCACCGA  
CCGGCATCGTCTACAAGAGTCACCCGGACTCTTAATCACCCGTTGTGGACTCTACA  
CCAGAGAGTCTATGTACGCCTCGATCCTTGGAAATGTGTACCGCAAACACGTCCGCT  
TACCCCCACGACTAACGGAGGGGAAGGTTAAGTGGAAATCCAAACTCATGACACAGTT  
GAACGTGCTAAACAGACAACCTGTCCATGTCTCGAGCAATTACAGAAGTTCCTGGTC  
ACTGAGGAGGACCTCAGTGGCAAGAAACGACCAAAGCGATTCTTGGTGGTCTGCT  
CGCCGCGGCGTCAGCCATCGGGTCACTATTCTCCATTGGCCTCTCAGCTGCCAACTC  
AATCAGCCTTAGTGCGCTCCAAAAACACATGGGTGAACTCGACAACGAAATGCCAG  
AAATCCAACAGAGACTCCTCCTTCAACAAGAACAATTACAGGGCCTGGGTAAAACC  
ATCCAGGGTACCATAGTCACTGTAAACTTACACTCCACTCTCCTCAATAACACTTTG  
CATGCCTTAGAAACCTTGTCAGAAGTTGTCAAAGAAGATATAACCTATGTACGAGTA  
GTCAGAGATCTAATGCAGGACCTCATCAGAGAAGTTAGTTCCTCAGTCAACAGCCTG  
AGTGGTGGGAAGATCCCAGCCTATCTGGTCCCCCTGGACCTTGTTGAGAAAATCCTC  
AAATCTGCGACTACCACTGTGGTTCAATCCTCACAAGTACACCTGGCATAACAGTCTT  
GGTAGTGCAATTCCAATTTAGTAGACCCAAAGAATCTAGAGATAGGATTTATTCTT  
AATCTACCCATCGTAGAAAGGCAAAACGTATACCGACTGAAGTCTGTACTAAATGTT  
GGGTTTTGGAAAGGCAACACACACGTGTACCTTAAGACACCACCAACCATTGCCTA  
CCACGATGATGATCCCTCGCTCTACCTCATTCTAACCCTAAACATGTGCACTAAAAC  
GAAGGACATCCATTGGGTTTGCCCAAGCAATCCCTTTGTTAGAGATGTAACCAACTA  
CCTTTGTGGCTTGAGAGCTGACTCCCCTGAACAAAGGTGCCAGGGTAGCATGTCCGC  
CAAAGACGAAGGAATAGAGACGAGAGTAGAACGAGCTGGTAATCGATGGCTCGTC  
AGCACACCTGCCACCGAAGCCCTAATGTCCTACGACCGCCATGATACAACCCTAA  
GCTAACCTTACCGAACCGAGACGATGTTCTTGACGGTTCCTGAAGGAGCCACTATA  
CATCGATGACATTGTCCTCATTATCTCAACCCCGACAGGCATGACGTGGAGATTGA  
GATTATGGACGCATTAGAGGTCACAACCTCACAATTGATGACGCCCTTCAACAACA  
GCTTCTAGCTGAAGGGACTAAATTGATTCAGTTCAGCCTCAAGCCAACCTGGACTTAT  
CACTACACCCTTTAGTCACGTAAGCAGGTCAACACCCTACCAAGAACACCCCATCAG  
TGTAGTCGCCCTTGGGCTGCTTCTTAGTGGTTGGATCATCACGGCAATTGTGCACA  
CATCATGTACAAATACATTCAAAAGCTACAGGCCAAGCTGGATTCCCTCCTGTTTGT  
GCCACCACGCTTTACACACCAGTCTGCGACTATCCCACGGGCTAACTCCACCCCTTT  
CCAGGAGTAAGCCTACTAATCTCTAACCCTCTTCTTTTTTTTTTTTGTGTGTTTTGTA

TCTTACGAGTTTTTTAGGACATCACCAATGATCAAATGCAGCAAAGACTGTATTAGGG  
TTAATGTCATGTTTACCCTTGATTTGAAATTTGTATATTGATGTATGATGTTCAATGT  
CGTTAGATAGTTAGAAGTCATCTGCCAGATGCTGCCTCAATGTCTGCCAGACACC  
ATAGTCTCTCCAACACCTATGAACTTTATAACTGCTTGGACTGTTTAAACCCCTTCC  
TGCCCCCAGGAATACATGGACGGTGTAACCTCAGGTTACCCTTGCTACATGGACTG  
TTCGGCCCTAGTTTGGCCCTAAAGACTGTGGCCAGCACCCACCCCTTCAGGTCAAAGG  
GGGGATGTTGGGACCTCACCACGTGGGTGAACAAAGGAGAGGCCTACATGTAAAGA  
CAAAGCCTGAAACAATGAAACGGCGCCAAATCCCATCAGGCCTTGCCTTCACAC  
CTTGGTGTGAAGTTTGGTTTAAATTCAAACACTGGTGTTCATTGGATGAACTCAC  
GGGAACCCAGGGAGTCCCCGTGACGCGGCCATGACGTCACCAGGAATATAATAAC  
CGGCCCGCACCTCTGCACGGGGCCGTCCGCTGTGACCCCGAGTCCGACAGGAGGTG  
ACCCAAACGTTTGTATTTCAACTAGCCGAGGCAACAGTCCCTAACTCGCTGGCCGAG  
AGCAGACTGTTTTATTTTGTTTTTGTGTTTTGTGTTTTACATCCGGACCCGGAAACAGA  
TCGCCTGCAACGAGCCGATCTTGTTTCATTACCTGCAGAAGGAAGAAACATTCTTCA  
AGAAAGAGAAGGATAACTTCTACGCCCCGCTCTCTTTCAATTAAGTCGACTCTCGCT  
GTTTCCTCCGCTGCCATACGAGGACCAGCTGATTCGCCGTTCAACCCCTCCACAAG  
TGAGGTAACGGCTCCGTCATCGTCTGAGCCTGCCGCTAAGCGCCGCCGACGTACG  
GACTAAAGCACAC

> Loki-Ofa consensus sequence *gag* gene

ATGAGTAGCCAAGACCCCCGTAGATCAGGAGTTGAAGCTCCCCAGGAGTCAGACGA  
TCTATCCCTGCAGGATGCGGTGCTGGCCTCCTCCACCTCTCTGTAGAGGACCGAAG  
TAACCTCGACAGCTACACTGTTGACGCATGTAATGAGAAATTGAAGGAGCTGGTGG  
CTTATGTCAATCACCCGGCCGGGAAGCCACAGCGCACCATCTCTGACGTGCTTGGTG  
AAATACTTCTCCTCTCTCAGCGCAAAGCCCGACTGCAAGCTGCAGAGCATAAGGTGC  
AGCTTGCCCAGCTGCAGCGGAGCAATGCCAGCCTGCGACAGGAAGTCCAGGCCGCA  
CAAAGTGAAGATCTCCAGATACAGGATGATCATGATCAGCTGCAGGGGTATGCAGA  
AACCCCTGCATGCGCAGCTCCAGACTGCCCAACAAAAACAGAGGTCAGGCGTGAAG  
AACAGATCGGCCAGGTAAGTACCGTTGCCGACCCCTTCGCCCAAGAGTCACTTGAA  
GATGCCCTGACCTTGAAGCGGCTCCTCCTCAGGTCGCAGTCAGCCGACCCGTGCTC  
ATAAGAGCACAGCCGACCTGGACGAGTCTGACCGACTGCGCTCAGAACTTCATGCC  
GCCCGCANTGAGAGAAACAGCCCTGCTCCAGAGACTTGAGGTTGCCCGACCGAGTG  
ACCAAACCACTCCGGCCAACCCAGGAGCCATGACTGGGAACTTAGCGGCCACACGC  
AGCGCGTTCTCTGAGCTGGTCACAGTTGACAGCTATCAAGCACCTCTATCGGCCCGC  
TCATTCGACATGGGTGCTCCACCTCCCTTTAGCCGCCCTACCTTGCGTACTGACAGG  
AGGGGATTCCCTCCCCTCCGGGGTGGGGATTACTCCCAAGTCCCGAGCGGCATAAGT  
GGTTTTAAGCCCTCATCCACTAGCGAGCAATATACATCGCGCAGCTCGCGCCTGCGC  
CTCAATAGGACTCCATCCCCACCGCCAAAGGGGGGAAGTCATCCTCACCGTTATATT  
GCATTGAGTGACCATGGGACGTCAGATGACTCAGACGGCCCATGGCCGACCGAGA  
ACAAGGCCTACGTACTCGCCAGGTGAGTCCCTCGCCAGGGATGTAGAGCGCTTCG  
ACCCGGGCAATCGAGAGTCAAACATCAATGACTACCTCAGAGAAGTAGAGCGTTGT  
CTCCTTGACCTACCTCACGCTTTGTACGTGAGAACTGAAGCTTATCTGGAAGACC  
ACGGCTAGGAGCGTCCATGTCTTCATGGAAACGCTCCACCTGGGACCAGAGACCG  
CTACTCAGCACTCTGCAAGGCCCTACGGGAGGAGTACTCATTGTACACCGACCGAG  
CTTCCGCCACTCTCGGCGCCTTCGCAATCATGCAAAAAGAAGCATGAACCTCCAAGGG  
AGTATTATAGGCGTCTGAGAGCTGCGTACTTCTGGGACGTAATGCCCCAGGCCTGG  
AGGAGGATCAGGCTTCAAGTCCCTGTTCTCCACAACCTCCACGAGAGTGTGCGCT

ATGATATAACTATGCACTGCAGGACGCATGATCTCACCATGCCGGAGATCAGGAAA  
TATGCGCAGATGGCATGGGAGACACGTGCACGCCCTGTTAGGAGGTACGAAGACGA  
CGCCAGGGTCCTTGGGATCCAAGCCTCGGCAAACACAGACTTAGCGCTAGAAGGTG  
ACGAAATCCCTCGCGTTAAGACAAACACCAGAGCAGTACCTCAGGGTCGACGGCCA  
TTTCGCCAACAGAACTGGCAACAGAACCAAGGGGGTGAGAGACAGCATTACTCCCA  
AAACCAGGTCAGGCCTCGACAACCAAACACCCTCAACCAGGAAGGCAAGGTTGGT  
TCGAGAGAAACCTTAAGCAAGGAGGTAAGTATGATGGTAAGATCCCAAACAAACAG  
AAAGGAGATGGTTCTAAGCAGGACATGGAGAGCCTGATTCGGAAATGCTTGGCGGA  
GGCAATGAAACAGCTCGAGACATCCCGTCATTCACCAATGACGCCGGACCCTTCAA  
AGGGACCTGATACAAAACCCCGCCCTTATGA

> Loki-Ofa consensus sequence Gag protein

MSSQDPRRSQVEAPQESDDLQDAVAGLLHLSVEDRSNLDSYTVDACNEKLKELVAY  
VNHPAGKPQRTISDVLGEILLLSQRKARLQAAEHKVQLAQLQRSNASLRQEVQAAQTEI  
SQQDDHDQLQGYAETLHAQLQTAQQKTEVRREEQIGQVSTVADPFAQESLEDAPDLEA  
APPQVAVSRPVLIRAQPTWTSITDCAQNFMPXRETALLQRLEVARPSDQTTTPANPGA  
MTGNLAHSSAFSELVTVDSYQAPLSARSFDMGAPPPSRPTLRDTRRGFPPLRGGDYS  
QVPSGISGFKPSSTSEQYTSRSSRLRNRTSPPPKGGSHPHRYIALSDHGTSDSDGPWP  
HREQGLRTRQVESLARDVERFDPGNRESNINDYLREVERCLLDLPHALSREKLKLIWKT  
TARSVHVMETLPPGTRDRYSALCKALREEYSLYTDRASATLGAFAIMQKKHEPPREYY  
RRLRAAYFLGRNAPGLEEDQAFKSLFLHNLHESVRYDITMHCRTDLMPEIRKYAQM  
AWETRARPVRRYEDDARVLGIQASANTDLALEGDEIPRVKTNTRAVPQGRPFRRQNW  
QQNQGGERRQHYSQNQVRPRQPNTQPGRQGWFERNLKQGGKYDGKIPNKQKGDGSKQ  
DMESLIRKCLAEAMKQLETSRHSPMTPDPSKGPDTKTPPL\*

> Loki-Ofa consensus sequence *pol* gene

TTGACCTTCTTAGGTGATCTCATCCGCAAGGGCAACGCCCAACGGATATACACCTCA  
GTAGTAGTAGGGGGGTGTGTGCAGCACCTCGCCCTGCTAGACTCTGGTTCTGAAATA  
AGCTTGATGTGTTCCAGTACCTTCGCTGAGGTGCCAGAGCGATGCTCTCCCTCGGC  
AAGCCGTTACAAGTCGAGACCTGTAACGTCAACATCACCAGCTACACACAAGATAA  
ATCACCCATCACGAAACGTGCTTGGTTTGATATTTCTTCCAGGAGATGACACTAGC  
GCATCCCATCTACATCTGTATCCTCGATACAGAACCTTTACTTATCGGTCAGGACCTC  
TTGGACCGACTGGCCCCACTCATTGACTGCCACCGTGGACATATGTGGGCTCAGGTT  
GACACCCCAAAGCCTCTTGGCTCCATGGGCTGTCCGCCAGCTCTGAACGGACAAGTC  
GCCGTTATCCAAGAGTCCAGAGGACCCGTACCGATGCTCATGCCTCTCCAGAGCCT  
GATCCTGACTCTGAGCCTTCTATGCCACTGGCAAGCTCACAACCGCTGCAGATTGGA  
AATGCAAACCTCTTCCACGCTCACGAGTCTTTCTTTGCTCGCTGAGAAACACAAAC  
TCAGCACTATACAGCCCCATGTGGTTGGAGGCATACACCTCAATGGCATTACGGCT  
CCAGAGGTAATACTAGCGCTCTGGTCTGAGAAGTCTGCCGTCAGCCAAGACCTGTAC  
AACAGCCTGAGTCAGCGCAACCCTCGTTTGGCTTTTGTGCAAAGAAGCCACCGCCTT  
CTTTCTGCAGATTCACCACAGACTCTCCTCAAGGCAATTGGGGTATGCGTTCTCTCCA  
TACAGATTGGAAAAAACAAGTCACTCACTTTGTGAGTGTGTTCTCTCGACTCCACC  
CCCCATTCTCTATAGGGGCGGATCTTCTTGTGAGGCTCGGCGCCAGCTGGACACGG  
TGAACCAAATCCTGTGGTTCGAGGCAACACAAAGGACTACCCCTTAACCACCGAG  
CCAGAACACATGCTATCAGGGCAGACCATCCCTCAGGCATGCCAGGTCGCCAGTGA  
AGTCGACGTGACTGTTCTGACGAACAGCAGGGGTTCCCATTCGCCTTGCATCCT  
TAAGGGACAGAAGATGCCTGACCTGCAGGCATTCTTCCAACCTTACCCATTCTG  
GGAACCTAACCTGACAGTCTGCGGTACACCCTGCTTGAGTTGAACAATCGTTCAAC

CTATTTACTGGTTCAGAACCTGACGCACGTCCCAATTCAGGTGAGGGCACGGCAACC  
ACTAGGGATGCTGGTTCGACAGCTCTTCCACGACTTTGAACTGACAGTGCCTGTCAT  
AGGAGATCTGCCCCATCCTTAGCCAGGGATGACAACCTGGACAATGCCCTTTTCAC  
TTTTCCGACCAAAATGACCACCATTGCCCGTCACGAAATGCTACAGAACGAAGCGA  
TCTGCGCACCCGCCCTGGGCACTGAAGGTGACATGGTTCGTGTACGCTCTCGTGACTC  
AGCCAGGAGACACGACCTCAGGTAGCAACGGAACCCGTTCCCTCACCAGAGGAACCG  
TACCCCGGCTTTGAGTCCGAAATTGAGCAGCAGCTTGCCAAAGCAAATGCTCTGACA  
ACAGAGTACCAGAGAGATGCACTTCGGAAGTTATTCCGTGATTTCCAGTCTATCTTC  
TCGAGGGACTCTAACGACTGTGGAGTCACTGACCTTCACACTGTTTCGCATTCCCCT  
GACCCAGAAACACCACCGTCATTTGTACGCCAGTACAGAATCCCGTTGGCTGCCTAT  
GAGTCGATCCAAGAGATACTCGATAACTTGCTGCAGAAGCAAATTATCAGGGAATG  
TAACTCAACCTACAACCTCGCCAATCTGGCCGGTGTAAAACCAACTGGTAAGTGGCG  
CCTAACAAATTGACTACCGCCCTTTGAACAAACAAGTTCCACTTTCACGCTGGCCCAT  
GATCCACCTGGATCAAGAAGTGGCCAAGGTAAGGGGGCCTGCTTCTTCTCAACGGT  
GGATGTGGCCAATGGTTTCTGGACCATGAGAGTCAATCCGGCTGACCAATACAAGCT  
GGCTTTCTCCTTTGGCAACCGCCAGTTCACCTGGAACCGTTGCCCATTTGGATACTCG  
AACTCCCCAGCTGAGTTCAACATTTTCTCCACAAAGCGATGAGTGATGCCGCTGCC  
CGCGGGAATCTCATTTACGTGGATGACATCCTCATGAGGAGTCGAACCTTGNAAAG  
ACACCTGGCAGAGATCCGTCATGTCTCAACCAACTTCTGCCGCCGGAGCCAAACT  
GGCCATCGCCAAGGGCCAATGGTGCCGTACCAAGGTGGAATATGTGGGTTTGACAG  
TGGGTGCTGATGGCATCGAACCCAGGCTGGGAGGATTCGAGCCATCCAAGACATC  
AAAGCCCCGACGGGCGTGTGCGAACTCAGGAGCTTCCTGGGTGTCTGCAACTACTCC  
CGACAGTTCATTGAGGACTACGCGGAGATAGCCAGACCCCTCACGGAGCTCCTTCG  
CAAAGACAAGTCCTTTGAGTGGGGAGAACCCTCAAGAGCAGTCCTTCCGCAAAATGA  
AGGAGAACTCTGCTCTGCATCTTGTTGGCTTACCCAGACAAGGACAAAGAGTTCC  
ACCTTGAGGCAAGTTTCTCTCCCCACAGCCTCAGTGCTGCCTTGGCGCAGAAATACG  
ACACAGACAAGCGGGTCGTCGCCTACGCGAGCCGACCTCTAAGCAGCGTCGAGATT  
AAATTCTCTGATTGCGAGAAAGCCCTCCTTGCTACCGTCTGGGCTGTAGAACAACCTC  
CGCAGCTACATCGGAGGCCAGAAGGTAATCATCGAGACTTGTCACCAACCTGTCAC  
TTTCTTGAACAGCCAGCGGCTGAGAGAAGGACGTGTATCTAATAGCCGCATCGCCTC  
CTGGATGATGGCACTGCAAGGCTACGACATCACGGTCAAGTATGCTCAGAACCACA  
AGATGGCCTTGGGCCAGGGCCTGGCCGAATGTCAGCATTGCGACTGTGAGGAGCAA  
CCAACTCCCAGCCCCTTCTCTTAACCACTCCATCGCTTCCTTCCAATCATCATTATT  
ATGATGAGAACGTTTGTCAAGACCTTCCAAGGGTCTATGTGGATGGCTGCTCGTTCC  
ACCATGAAAGCCAGACACGGGCTGGAGTTGGCATTGTTTGGGTCAACCACAAGGTT  
GACGAACCAAACTACTACCAGTTGGGCCCTAAGACAAGTCAGTATGCAGAGATCGC  
TGCAGTGCTGATCACCTCCAACAAGCTGCCAAGCTAGCCATCGTGCAGCTGGTGAT  
CTGCTCCGACTCTAACTACGCTCGTCACAGCTTTATTTCCACTTTCCCGTGTGGAAA  
GAGAACGGCATGAAAAACGCACGGAATAAAGAAGTCAAACACTCAGAACTCTTCTT  
GGCTTGCACCAACTTGTGACGGACCGAGGGATGACCGTGTACTGGAAGAAGGTCA  
AAGGTCAATCCCAAACCGCAGGTCCCGACAAGGATGGTAACGATGAAGCCGACCGC  
CTAGCCAAGCTAGGTGCGGAACAGGGCACGCCCTGGGAGTTCCAGAGTGATTGGCT  
CCCAATTCCCCAAACGTGTGCAGTGAATGCCATTACCCGCCGGCAGGCAAGAGAAA  
AACGAGAGGACCCTCAAGCCTGCACCCAACTCTACACCTGGGTGCGCACCCAGC  
GATGCAGATTTAGTTACTATGCAGGAACAAGACCCTGCCATTCAAGCCATCCGTCAG  
TGATGTTGAACCCTCCACGGCAAGGGGTCTCACAACCTCACTGGTCGAGTCAGA

GGAGCTGCGAACTCTCCGCTCCGACCAGCTTCACCTCAAACCTGGAAAAGGGTCTGCT  
CGTCTACACCTACAACGGCCAGGGACCGACCCGTTGGGTCGTCCCAACCAACCATA  
GGGGGGTGTATGCTAGCCCACGCTCACGACTCTCCCGTCGGAGGCCACCGGGGTTAC  
AGAGCCACTCTCCAAACCCTCCAGCAAGTCGCCTATTGGCCATTGATGGCTCGTGAC  
ACTAAATCCTACGTCCAAGGATGTCTGGTCTGCTGCCAGTTCAGCCGTCCCGACCT  
CTGGGTCGTGCCCCACTCCAGAAAAGGGGGGTCACATTCCCATGGTCTCACCTCCAG  
GTTGACTGGGTTCGGACCAGTCCCCAAGTCATCACGAGGAAATAAATATCTTCTCACT  
GTCACGTGCGCCTTCACCAAATGGGTGGAATGCCTCCCGGCACCCAACGATACTGCT  
ATGACGACAGCAACCCTCCTGCTGAACCATGTGTTTAGCCGCTGGGGGGTACCCCTC  
TCTGTGACTCAGATCGAGGCACCCATTTACGTCTAGTGTCATGACCACCCTGTAT  
GACATCCTGGGAGTGGAAGTAAAATCCACATCTCGCATCATCCCCAGTCATCCGGC  
CAGGTCGAACGCGCCAACCGCACCAATTGTTAGCATGCTCAAGAAGTATGTCAGCAG  
CAATGGCAAGGATTGGGATGTGAAACTTCCTTTGGTGTGATGGCCATCAGGTCCAC  
CCCGCACCGCTCCACAGGAGTCACACCCTTTGAAATGATGACTGGAAGAGAGATGA  
CCCTTCCACTACATCTCTTGTATCATCCTGAAGATGTCAGTGTTGCAACCGCCTATA  
GGCGCATCAATATGTGACGGACTTGCGCGACCACCTTCGAGCCACGTTTCGCGTGGGC  
CCAGACAAACTTGGAGGCCAGCGTTGAAGGATCAAAGCCTACTATGACAGGAAAG  
CGTCCCACCGCGAGTACCAAGTAGGCGATAAAAATCTTGTACTTCAGATTCGCCAAAC  
CGGTAGGAATCTCCAAGAAGTTCCTACCGAGCTGGTCAGGCCCGTTTCGAGATTGTGG  
GAAAACCTCACCGGTAGCTTATCGGATCAGAGTCTCGAAACCAAAGCAACCACCA  
GCATACAAATGGGTCCATGCAAATCAAATTAACCCCTACCAGTCATCCTCCCTCTCA  
AGGGGAGAGGAAGCCTCTACACCCGAAAGGGGGGAGCAGTCTTCACTCCAAGAGG  
GAGAAGACTCAGTCCAGTAA

> Loki-Ofa consensus sequence Pol protein

LTFLGDLIRKGNARQRIYTSVVVGGCVSTLALLDSGSEISLMCSSTFAEVARAMLSLKGPL  
QVETCNVNITSYTQDKSPITKRAWFDISFQEMTLAHPYICILDTEPLLIGQDLLDRLAPLI  
DCHRGHMWAQVDTPKPLGSMGCPPALNGQVAVIQESRGPVPMMLPEPDPDSEPSMP  
LASSQPLQIGNANSFHAFHESFLCSLRNTNSALYSPHVVGGIHLNGITAPEVILALWSEKSA  
VSQDLYNLSQRNPRLAFVQRSHRLLSADSPQTLLKAIGVCVLSIQIGKKQVTHFVSVVP  
RLHPPFSIGADLLVRLGAQLDTVNQILWSQANTKDYPLTTEPEHMLSGQTIPQACQVASE  
VDVTVPARTAGVPIRLAILKGQKMPDLQAFFQPLPHFWELNLTVCGTPLLELNNRSTYL  
LVQNLTHVPIQVRARQPLGMLVDSSFHDFELTVPVIGDLPPSLARDDNLDNALFTFPTK  
MTTIARHEMLQNEAICGTALGTEGDMVVYALVTQPGDTSNGSNGTRSSPEEPYPGFESEI  
EQQLAKANALTTEYQRDALRKLFRDFQSIFSRDSNDCGVTDLHTVRIPTDPETPPSFVRQ  
YRIPLAAYESIQEILDNLLQKQIIRECNSTYNSPIWPVLKPTGKWRLTIDYRPLNKQVPLSR  
WPMIHLQELAKVKGACFFSTVDVANGFWTMRVNPADQYKLAFSFGNRQFTWNRCPF  
GYSNSPAEFNIFLHKAMSDAAARGNLIYVDDILMRSRTLXHLAEIRHVLNQLSAAGAK  
LAIKGGQWCRTKVEYVGLTVGADGIEPQAGRIRAIQDIKAPTGVSELRSFLGVCNYSRQF  
IEDYAEIARPLTELLRKDKSFEGEPQEQSFRKMKEKLCASCLAYPKDKKEFHLEASF  
PHLSAALAKYDTRVAYASRPLSSVEIKFSDCEKALLATVWAVEHFRSYIGGQKV  
IETCHQPVTFLNSQRLREGRVSNRIASWMMALQGYDITVKYAQNHKMALGQGLAEC  
QHCDCEEQPNSQPLLLTTPSLPSNHYYDENVCQDLPRVYVDGCSFHESQTRAGVGIV  
WVNHKVDEPNHYQLGPKTSQYAEIAAVLITLQQAALAIQVQLVICSDSNYARHSFISHFP  
VWKENGMKNARNKEVKHSELFLACDQLVTDRGMTVYWKVKGHSQTAGPDKDGND  
EADRLAKLGAEQGTPEWFQSDWLPQPQCAVNAITRRQAREKREDPQACTQTLHLGRAP  
SDADLVTMQEQDPAIQAIRQWMLNPPRQGVSTSLVESEELRTLRSQDLHLKLEKGLLV



YTYNGQGPTRWVVPNTNHRGVMLAHAHDSVGGHRGYRATLQTLQQVAYWPLMARDT  
KSYVQGCLVCCQFQPSRPLGRAPLQKRGVTFPWSHLQVDWVGPVPSKSSRGNKYLLT  
CAFTKWVECLPAPNDTAMTTATLLLNHVFSRWGLPLSVSDRGTHFTSSVMTTLYDILG  
VEVKFHISHHPQSSGQVERANRTIVSMLKKYVSSNGKDWVVKLPLVLMAIRSTPHRSTG  
VTPFEMMTGREMTLPLHLLYHPEDVSVATAYTAHQYVTDLRDHLRATFAWAQTNLEA  
SVEGSKAYYDRKASHREYQVGDKILYFRFAKPVGISKKFLPSWSGPFIVGKLSPVAYRI  
RVSKPKQPPAYKVVHANQIKPYQSSSLSRGEEASTPERGEQSSLQEGEDSVQ\*

> Loki-Ofa consensus sequence *env* gene

ATGCAAATCAAATTAACCCCTACCAGTCATCCTCCCTCTCAAGGGGAGAGGAAGCC  
TCTACACCCGAAAGGGGGGAGCAGTCTTCACTCCAAGAGGGAGAAGACTCAGTCCA  
GTAAACCCATAGGGATAGCTGCATGCCTCAACTACCCCGTCGGCATGCACTAACTC  
CTAATACGTTTCATCCCCCTTTTCCCTACAATAATCAACTCTGGTTTGTTCAGGAT  
GAAACTCCTTTGGATCTTCGGCATTCTCATCAGTCTACGAGTCACCCTGTCTATGGAA  
GTGGTTCGAACCCGGCCACCGACCGGCATCGTCCTACAAGAGTCACCCGGACTCTTA  
ATCACCCGTTGTGGACTCTACACCCAGAGAGTCTATGTACGCCTCGATCCTTGGAA  
GTGTACCGCAAACACGTCGGCTTACCCCCACGACTAACGGAGGGAAGGTTAAGTGG  
AATCCAACTCATGACACAGTTGAACGTGCTAAACAGACAACACTGTCCATGTCCTCGA  
GCAATTACAGAAGTTCCTGGTCACTGAGGAGGACCTCAGTGGCAAGAAACGACCAA  
AGCGATTCTTGGTGGTCTGCTCGCCGCGGCGTCAGCCATCGGGTCACTATTCTCCA  
TTGGCCTCTCAGCTGCCAACTCAATCAGCCTTAGTGCGCTCCAAAAACACATGGGTG  
AACTCGACAACGAAATGCCAGAAATCCAACAGAGACTCCTCCTTCAACAAGAACAA  
TTACAGGGCCTGGGTAAAACCATCCAGGGTACCATAGTCACTGTAAACTTACTACTCC  
ACTCTCCTCAATAACACTTTGCATGCCTTAGAAACCTTGTGAGAAGTTGTCAAAGAA  
GATATAACCTATGTACGAGTAGTCAGAGATCTAATGCAGGACCTCATCAGAGAAGT  
TAGTTCCTCAGTCAACAGCCTGAGTGGTGGGAAGATCCCAGCCTATCTGGTCCCCCT  
GGACCTTGTGAGAAAATCCTCAAATCTGCGACTACCACTGTGGTTCAATCCTCACA  
AGTACACCTGGCATAACAGTCTTGGTAGTGCAATTCCAATTTTCAGTAGACCCAAAGAA  
TCTAGAGATAGGATTTATTCTTAATCTACCCATCGTAGAAAGGCAAAACGTATACCG  
ACTGAAGTCTGTACTAAATGTTGGGTTTTGGAAAGGCAACACACACGTGTACCTTAA  
GACACCACCAACCATTGCCTACCACGATGATGATCCCTCGCTCTACCTCATTCTTAA  
CCTAAACATGTGCACTAAAACGAAGGACATCCATTGGGTTTGCCTAAGCAATCCCTT  
TGTTAGAGATGTAACCAACTACCTTTGTGGCTTGAGAGCTGACTCCCCTGAACAAAG  
GTGCCAGGGTAGCATGTCCGCCAAAGACGAAGGAATAGAGACGAGAGTAGAACGA  
GCTGGTAATCGATGGCTCGTCAGCACACCTGCCACCGAAGCCCTAATGTCCTACGAC  
CGCCATGATAACAACCACTAAGCTAACCTTACCGAACCAGACGATGTTCTTGACGGTT  
CCTGAAGGAGCCACTATAACACATCGATGACATTGTCCTCCTCATTATCTCAACCCCGAC  
AGGCATGACGTGGAGATTGAGATTATGGACGCATTCAGAGGTCACAACCTCACAAT  
TGATGACGCCCTTCAACAACAGCTTCTAGCTGAAGGGACTAAATTGATTTCAGTTCAG  
CCTCAAGCCAACTGGACTTACTACTACACCCTTTAGTCAAGCAAGGTCACACACC  
CTACCAAGAACACCCCATCAGTGTAGTCGCCCTTGGGCTGCTTCTTAGTGGTTGGAT  
CATCACGGCAATTGTCGCACACATCATGTACAAATACATTCAAAGCTACAGGCCA  
AGCTGGATTCCCTCCTGTTTGTGCCACCACGCTTACACACCAGTCTGCGACTATCCC  
ACGGGCTAACTCCACCCTTTCCAGGAGTAA

> Loki-Ofa consensus sequence Env protein

MQIKLNPTSHPPSQGERKPLHPKGGSSLHSHKREKTQSSKPIGIAACLNSPRRHALTPNTFIP  
LFPYNNSTLVCFRMKLLWIFGILISLRVTLMSMEVVEPGPPTGIVLQESPLITRCGLYTQR

VYVRLDPWNVYRKHVRLPPRLTEGRLSGIQTHDTVERAKQTTVHVLEQLQKFLVTEED  
LSGKKRPKRFLGGLLAAASAIGSLFSIGLSAANSISLSALQKHMGE LDNEMPEIQRLLL  
QQEQLQGLGKTIQGTIVTVNLHSTLLNNTLHALET LSEVVKEDITYVRVVRDLMQDLIRE  
VSSSVNSLSGGKIPAYLVPLDLVEKILKSATTTVVQSSQVHLAYSLSAIPISVDPKNLEIG  
FILNLPIVERQNVYRLKSVLNVGFWKGNTHVYLKTPPTIAYHDDDPSLYLIPNLNMCTKT  
KDIHWVCPSPNFVRDVTNYLCGLRADSP EQRCQGSMSAKDEGIETRVERAGNRWL VST  
PATEALMSYDRHDTTTLKLTLPNQTMFLTVPEGATIHIDDIVLHYLNPDRHDVEIEIMDAF  
RGHNL TIDDALQQQLLAEGTKLIQFSLKPTGLITTPFSHVSRSTPYQEHPISVVALG LLLSG  
WIITAIVAHIMYKYIQKLQAKLDSLLFVPPRFTHQSATIPRANSTPFQE\*

>Loki-Ame consensus sequence

TTGATCATTTAAGAATGTTAAGGTTTAGAAATTATACTTGCAGTTAGGAAACCTATC  
ACAAGTTAGGGCCAATACGTCACGAAGGGAACGTGTTTTCCAATAAAGGGGGATGT  
TAGTTCATTCAGTAGTAGTTCGTGGTTCGCAGTTCGGAGTTCGTGCGCTTTTTAGGTT  
TAGTTAAGTTCAATTTTTTTTTTAAGTAATTTAACTTAGAGTTTTAGTTAGAATTTG  
TACTCTCTCTTTGGTTTTACTTTCTCTTAGATTCAGCTTAGTGATTCTTAAGTTCGTG  
AGTCATAGATCCTAGCTCTAGCTGCGCTTGCAGCGCACCCGGGCTGACTAACACAAG  
TCCAGCGATTATCAACAGAATTAGAGAATTAGGTGCTTCCAGCTATTGAACCACCTT  
AGCGCTACGGAGCTGCCTATAGTTCACCGCTCATACTTAGCGTTATACATCGCTCGC  
CGTACCAGACCCAGACGCGAAGAGAATCCTGAATCAATCAGCTGCCCGGAGCGAGG  
CTCCCGCTTGCCGTTGGAACCGAAGCCCTGCTTGCACCGTGAAGTCCACCTGAAGAA  
CCCGCTTGGCCACCTGGATCGAGCTACCCTTCTGGCGGTCGACACCGACGGTTCCC  
TTCGCGGCAGAGACGACACCGGTTGCCGAGGCCGGTCAACGCAAAGTGAGGCGCTG  
GTTAAATCTCTAATTCTCTGGTGGCGTTCTGTTGGTCTGGTTAGGTTGAGTCTTGCTA  
AGTTTTCAAGTTATAGGTATTCCGGTTGAGATGGTGGTGATCTCTGTCAGTTCCATAGT  
TCTAATGTAATCTAGTTAACTCAAGTAGCTTGGGTTTAGGGCGTTTTTGCTTCTTTA  
GTAGTTAGTTCGTTTATAGCAGTATATAATCACTTATAATCTTGTTAATCTCCTAAT  
ATTCTTATAGTGGGTTTAGTTATCCATATTTAGGTTTATCTCCTAGTGGGTTATCATA  
ATTACTTCCCCTTTGGTATATTAAGTGGGTATTGATTTGTTTATTTTTATCTACTTAT  
ACATTTCTGTTGTTTGGGTCTAAAGTGTTTTGAGTTATTCATATATGCGATGAGAAGG  
TTTGGTTGTAAGACTGTTATCATCAGCGTGCTTGAATTTCACTCTCAAATTGTTGTTT  
GAATTATGCCCTTATCTAATTCTGCATATATCCATGTATTACTTTTATTCTAAATAA  
ACATTACTTGATTTAGCCAATTCCTGACTTAAGTGTGTTCCCTCCCGTGGTTCAAAGAC  
TTTCTGAAACCGACAAGA ACTCACCTGAGGTTAAATATAAATTTTG TAGCTAGCCG  
CTACTGGCGCCCTATTAACCTTTAATATTAATATTA AAAATTAATATTGATATCAGGTA  
AATAGTTCGGTATCCATTGTAACCACTACATATTTGGCGCCCAACGTGGGGCCAACG  
TCACATCTCTGATCTACGGGAGAAAGCACGGAGTTAAGAAACGTATTGGTGTGTTGT  
GTTTATTAATATCTACCTTACGCTCCGCGTTAGTAAAACGCCAGCGGGCTGGCGAA  
AGCTAACCGGGTCACTCCTCTGTCTGTGTGCGCGCACATCTATATACATCTATATATA  
TATCCAACCTCTTTATGTGTATGTGTTTTAAAGAGCATTGGTAATCACTTGTGAAACG  
CCTCATATTACTCGCCAAAGAGCTGATCAGTGTGAGTGC GTGTGTGTATTGTAGACG  
CCGCTGTACGTCTGCTTTCATTATCACTGTTATTGGTGCTTTACATTTACCCGGGGTA  
TCTAAACAGGCTCAGCCGACA ACTATTATCACGTGAATTATATCAGCGCTATTTGTA  
AAGGCCTCAGCGAGGTTGCTGTAGCTGCGGATTTCCAGTGCAGTAAACCCGCTTCCC  
AGTTTAAACGGCCCGTGTGCGCGGATTTCCGCACCCCGGTCG TACTGGGACCCTCTC  
GTGTGCCCGCGGCTTTGCAAACCGCGGCGTAACGCTATCCTTTTAGGTTGGTAGAGA  
GTTTTACAGTCGCGAAAACGCGACGGGCGAGGATCACGCCCTCAGCGGAAGCCCCG



AAAAAAAAAACTACACTTTTGGCTTATTAGATTCACTAGGGACTACGCATCAAAGTTG  
TTACCCTAGCATCAATCTCTCCAATCTCAGCAGCAGTGCTAAGTCACCCATCCGGGA  
CTGGCTTCCAATACAGCTCGCATCGCTTGACCCTCGTCAAGTCAAATGAGTTCTCC  
AAGAGAGGCAGGGTCCCCGCTCCTCAGCGAGGCTGAGTCGGTGGACCAAGTAGAAG  
CCACTCTTCTTGATTTAGTAAGCTGCCGCATTCCAGACTATGCTGAAGGCGTGCAAC  
AGGCAGATGATGCCACCTTCAGAGTTTGATGACTAGCTGTGTGGACGACCACCTAA  
CTAAATCCCTAAAAATAAAAGAACAATAGACACCGTGTACAAAATGGCCCTCATA  
CTCTGGAGACAACCTCAACTCTCACAAGAGAGAGCAACATGCTACTAACCCTG  
TACAGCTCTCCAGCAAACCTAACCAAAAACCTCAGGGACGAATTGGCGCAATGGCATA  
ATACTGGTTCAGAGATAACAATCCCAACAAGAAGCCCTTGAACATAAAGTAAAGTCA  
CTGCAGGAAGAGGCCGCAACAGCCACAAAGCTTGCCATCCAGTCACGAGGTAAGCT  
GGAGGAAGCCCAGGAGCAGCAGACCGAACTCGAGGCTGAACTAACACAGGCTATG  
AGTGCTTTAAGATTAGCTCGTATAGAAAAAAGGGATGCAGAAACGCAGTTGGCAGA  
GTTCAAATTAGAACGGGATGAGACATATCCCGGGGGCCAAAGGTAAGCCCAACAA  
AGGGTAGACCAGCGACCCACATCTCTTTAAGACGGAGGTACATACTCCTACGCCC  
GTAACCTCCATGGGTTACCAGGGAGGAGCTGAAGCTCCTCGATCACCCATCAGAGTC  
AAACCGGAACCGGCTGGCCCCAAAAGGTGAACCGGACCCTGTTTGGCTGGGACGA  
ATCTGAACACACCCGACGACCCCAACAATGCAGATATGGCCAGGCCATAACAC  
CCTCAGATAGAGATTTGGATAAAGTTGCCCGCAATATCAGCCGGTTTGAACCTAAGC  
CTGGCTGCCCTAATGATATCCACCTTATCTAAATGACATTGATTACTATCTACGGCG  
CTTCCCTCTGGCCACCATAGACGACAGAATCTATCTCATTAAAATAACATCCAGCCG  
CGACGTTAGCAGTTTCATTGAACGCCAACACCACACGTAAGGGGGAACTATAGGG  
CTCTCTGCCAAGCATTGGAGGCAGAATTCTCTAGCTTCTCAACCCAGTTAGGCCTCT  
CCGCTGCATTCACGGTGAGGCAGAACAGGCAGGAGGGTCCCGAACAGTACTACTAT  
CGCCTCAGGCGCGCTTACTTTGGCTTCAAGAATGAACCAGAGATGGAGGAGGACGA  
AAATTTCAAGGTCCTGTTTGTCCAGAACCTCCATCCTTCAACCAGCCACCATTTAGGT  
GTCTCGGCTTGTCCCCGCACCCTGACTAGTCGGCAGCTAAGAGATCTAGCTCTTAGA  
GGCTTTGCAAAGTTCAGCAAAGTTTGGGTAAAAAAACCGACTCCGAGGTCCTTGC  
AGTAGCCAGTAACCCTTGTATGGAACCTAGAGGGGAAGCACAGCTTCCAGGGAAACAG  
ATAAGACTCACGGGTCCAGACCCTATAGACAAGAACCAGCCCAAAGTCAGCAGGTC  
GATCCACAGCGACGCCGCTCACCTACTTATAAGGTGAATCGCGGCCAGGGCAGACC  
CCATCGAGGTCGAGCCTCCCACCATCAACGTGGTGGCAGGCCACACCATCATGGGA  
ATAACAGGCACTCTGGACCAAACCAGACTGCAAAAAGCCCTAAATCATCACTTGAC  
AAAACCCTTAACGGCCTGGAGGCAGGGGATCTTGAGTTAATCCTGCAATGGGTAA  
CCAAATGCGCAAGGAGAAAAGGGGTAACTCAACCAAGGGCGCAACATCCAGGAG  
CAGTCGAGCACTGCTCCCCATGAAAAAGACCCCAACGAGCTACTTGGGAGCATGC  
CCAAGACTGCACCTAGTGCAGTCCTAGTTGTGGAACCTAGACACTGACCACTCTCT  
CAAGGAAGAAGACCCATTTCTAATTCGGGGGGAGCTTCCCTTTCCGACAGTTCTTGGG  
CCATCTGAGCGAAAGGGGGGTGGCCAGAAAATCTATCTTGCTACTACTTTGGAGGA  
TGAATTTGTGCAAGATGCTCTTCTTGACACGGCATCAGACATCACACTGATGTCCAT  
GTCCCTTTTTAACCAGGTGCGGGCATCCGCTCGGGCAGCGAATAGGGAGATACAGCT  
GAGTAACTGTTCTCTCAATATCCAGCCCTACTCACACACGGGCATCACCATAACATC  
GATGGCCCTAATTCAACTTACGATTGGGCCCGTGACTGTTGTTTCATCCAATTCATGTG  
TCTCCCTTGGAGTCCATCCATTCCTCGCAGGAAAAGATCTTCTTAATCGGTTTCGAGC  
CCCTTATCGACTTTCAAGGTCTTAAGATCTGGGCGCAGGTTTCGGCAACCCCTTCCGT  
TCTTCCCTCTCGTGAGGAGGAGATCCAGTGCTACCGTCTTTGTGGACAGTTCCAACC

ATGCAAGGAACTGATCGACCCCGTGGTTCCTATGGAGATTGAGGAAGAGCCTACAG  
CCGCCGTTTCACAGTTTACAAATCCTTCTTGGCCTCCAAGCTCAGTCTTGGAACAAC  
GTGACACCTTCTTGTGTACCATGGTCCCATCTGAAAATCTTGGGGAATATTGTCCA  
GAGTGGAGAAGGGGGTACATTGGACGACTTCCAGGTGGATGACGTGGTCATCGCC  
CTGTGGTCGGACAAATCCGCAGTCAGCCAAGACTTAGTAAACTCATTATCGGCAACC  
CATGCTAGCTTTCATTTCAATCCCAGGGAGCTTTTCCGCTTGGGCCCGTTCCTC  
AACCACCTTGCCGGCAGTCGGCACTTGTCTTTGACCGTCCGTTGGAACAAGAAAG  
AGTTCACCCAGCTTTTTCTTGTGGTCCCAGACTTACCTCATTCCATCTATGTGGGCGG  
TGACGTGTTGGTCAGGTTGGATGTTCAAGTAGACACCATCAATAACATCCTTTGGTC  
CCTCACAACACTCAGGCAGATGGCTCTTCCCCTGAGCCAGAGTATCTGCACTCGGG  
TCAGACCATACTGAAGTTTGTGAGGTGGCAAACAACCAAGCCATCACCCACCAGG  
CAAATACCAAAAATATCGGCCCTCTACCTGACCATCCTACCTGGACAACAACACTATGTC  
ACCCCATGCACTGTTCCAACCCTCACATCGATTCTTTGATCTTGGTCTGACCGTGGA  
AGCCACACCTCTTGTGGAGTTACGTGCTAGGTCAGTCTACTTGTTCGTTCAAAATTGT  
ACAACCCAGGACATAGTGATTCCCCAACTCACAGAACTGGGTTGGCTGGTTAGCAC  
CAAATTTCACTGACTTTGAACTGCGGCTTCCAGTCATCGGTCCGATTCCCTCAGCAGTTG  
CTCCCAAAGCAAGAGTCCAAGACATTATACACCCGACCGTCTGGGGCAATTGCTATT  
TTTCTGTCTTGGAGACCAATGAAGATGCGTTGTACCGCATTGATCTGACCCACAGG  
GACCAAATGGTCTTGGATACAGTCACTGTCCTTAGTCTCGATTCTGTCCCATCACCTG  
GCACTAACACAGTCTGGTGAAGCAGAAGGAGGAGGCCGACAGTTTTCTTCAACT  
CAAACAGAGTTTGAGAAGCAACTACAGCAAATGCTGTTAGATGCGGATGCATTGCA  
ATCAGACGAAGAGCGTGTAAAGCTCAGAACAGTGCTGACTAAGTATCGCGCGTCTT  
TCTCTCAAGATTCTATGGATTGTGGATTGACCCACATCCATATGATTTCGTATTCCGAC  
GCATCCCGACGCTGCTCCTGCTTACGTTCCGCAATACAAGATTCCACTTGCATCATA  
CGGGCCGGTGCAAGAGATCATAGATGATCTTLAGACAAAGGAATAATCCGACCAT  
GCAACAGCACCTACTCTGCGCCACTTTGGCCGGTGTGTAAGCCCAATGGCAAATGGC  
GTCTGACTATTGACTATCGCCGCTAAATGACCAGGTCCCTCTTTCTAGATGGCCCAT  
GACCCAATTGGAGCAAGAACTCCCTAGGGTCAGAGATGCCAAATATTTTTCAACCTT  
AGATGTGGCATCGGGGTTCTGGACCATTCCGGTCCATGTGGAAGACCAACACAAC  
TGGCATTCACATTCGCCGGCCGTCAATTTACATTCACCCGCTGCCATTCCGATATTC  
CAATTCACCAGCTGAATTCAACATCTTTCTCAACAAAGCTTGTCTGATGCAAGAGA  
ACGAGGAACCTTGATTTATGTTGACGATGTTCTTATCCGGAACAATTCTCTCGATGCT  
CACTTGGAAAGAGATTGATCATGTGCTAGATCAGCTCACAAAAGCAGGTGCGAAAAT  
ATCCCTAGCCAAATGTCAGTGGTGCAAAACTAAGGTCAACTATGTGGGCCTTTTGGT  
TGGTCCAGATGGTGTCTCCCGCAACCATGTCGTGCCCAAGGCATCGTGGATATCGC  
GGAACCAAAAACCATCCACGCCCTTCGCAGCTTCTTGGGGGTATGCAACTACTCCCG  
CCAGTTCAATTGAAAACCTTTGCGGAACTGGCCAAGCCACTGTACCAGCTGTTAAAGCA  
GGATGTACCTTTCATTTGGGGTGAGGCCCAAGCCATGCAAACCCTCAAAG  
ACAACTGGCATANGACAAACTGGCATTACATTCGCCGGCCGTCAATTTACATTCA  
CCCGCTGCCCATTCGGATATTCCAATTCACCAGCTGAATTCAACATCTTTCTCAACA  
AAGCTTGTCTGATGCAAGAGAACGAGGAACCTTGATTTATGTTGACGATGTTCTTA  
TCCGGAACAATTCTCTCGATGCTCACTTGGAAAGAGATTGATCATGTGCTAGATCAGC  
TCACAAAAGCAGGTGCGAAAATATCCCTAGCCAAATGTCAGTGGTGCAAAACTAAG  
GTCAACTATGTGGGCCTTTTGGTGGTCCAGATGGTGTCTCCCGCAACCATGTCGTG  
CCCAAGGCATCGTGGATATCGCGGAACCAAAAACCATCCACGCCCTTCGCAGCTTCT  
TGGGGGTATGCAACTACTCCCGCCAGTTCATTGAAAACCTTTGCGGAACTGGCCAAGC

CACTGTACCAGCTGTTAAAGCAGGATGTACCTTTCATTTGGGGTGAGGCCCAGGCAC  
AAGCCATGCAAACCTCAAAGACAACTGGCATCGGCACCCTGTTAACCTATCCG  
GACCACAGCAGAGAATTCTACCTTCAAGTTGGGTTTTTCAGAGCACTGTGTGAGTGCT  
GGTCTATAACCAGGTACACGATCGAGACAAGAGAGTGGTGGCTTATGCAAGCAAAGC  
TTTGATGGCTCCGGAACCTCAAATACTCTGACTGTGAGAAAGCACTTCTGGCCACGGT  
CTGGGCAGTGAAACACTTCTCCAACCTACCTTGGGGGACAAAAGATCATTGTAGAAA  
CGAACCACCAGCCAGTGGTCTTTCTCAACAGTCAGCGCATTTCGAGAAGGTGTGGTCA  
CCAACGCACGAGTCGCCTCCTGGTAAATGGCCCTACAAAGTTTTGAGGTTGAGGTGC  
GCTATGCGCAAAACTCGAGATTACCTCTAGGCACTGATCTGGCGGCATGTCAGCGAT  
GTGAAACTGACATACCGGCCACATCAACGCCATTCCCAATCTCGCCTCCAAAAAC  
CCACAAACCATCGTTACTTTGACCCCAAGGAGTGTGAAAACATTCCCACGGTCTACG  
TAGATGGATGCTCTTCCGACATGACCAAGAAGGCCTCAAAGCCGGTGCAGGAATC  
GTCTGGCTTGATGACAATCCTTGCGAACCACAACAGTTCAAACTAGGATCACAACT  
TCTCAGTATGCCGAAATCGCTGCCATACTCATCACAATTCAACTTGCTATCGACCAG  
GGGGTAAAAACCTGGTAATCTGTACAGATTCCAACCTACGCACGTCTAAGTTTCACA  
TGTCACCTTGCCAATCTGGAAAACCAAGGTTTTCTCACATCTGGCAGGAAAGCAGTC  
AAACACACAGAGCTGTTACAGCCGCGGACTACCTGGTAGTTCGGCATGACATGCTT  
GTCTACTGGAAAAAGGTGAGGGGACACTCACGTGTCCAGGGACAGACAAGACATA  
CAATGATCAAGCTGATTCACTGGCCAAAAGAGGTGCCTTGGAAGGAGTTTCATGGG  
TCTTTGACCCGTTGAAATACCCAACCCAACCCAACCCCACTGTTTTAGCCGTGACTA  
GAGCACAAGCTAAACAAACCTCAACAACAGAAATCCCACCCTGCGCTGCGGTCTCC  
ATTGATCCAGAAATCACAGATGCTGATTTGATCACGCTACAAGACGCAGACCCCGA  
CATCAAATCTATTAAGGCTTTCTTGCTTGATCCCACCAACAATCCCATAACCAGCCA  
AATGCTGGAGGCATCAATTCGCTTAAACAACCTTTGGACAACCGCGCATTCTTGAA  
GGTGGTCAAGGGCTTGCTTGTTGATGTCACTGAGACCCACACTTCTCCTGCGTTCGTT  
GTGCCTCCGTGCCACAGGGGGGTAATGTTGGGGCACGCCCATGACTCTCCATCAGCA  
GGTCACAAAGGGATCAAGGAAACCTATAGGACACTCAAACAGGTGGCCTTTTGGCC  
ACGAATGCGGGAGCATGTAGCTAGTTACATTAAGGATGCTTGGTGTGCTGCCAGTT  
CCAGCCGGCGAATCCTCTGCACAGGGCTCCCTTACAGAGAAAGGGGTTAACCTTCCC  
GTGGTCCGATCTGCAAATGGATTGGGTGGGCCCCGCTCACAAAGTCTGCTCGAGGGA  
ACAAATATTTCTCACAGTCACATGTGCATTCACCAAGTGGGTGGAGTGTCTTCCAG  
CCGCCAATGACACCGCTATAACCACAGCGTGTCTCCTGGTTAATCATATCTTACCC  
GGTTTGGTCTTCTTGTAGGGTTGACTCAGATCGAGGTACTCATTTACGCGCAGAAG  
TCATGCAACAAATGTGGCACGTCTCCTCGGTGTAAAAGCCAAGTTGCACGTGAGCTACC  
ACCCCAGTCTCTGGTCAGGTCGAACGGGCTAACCGCACAGTGGTTCAGCATCCTCA  
AGAAATTTGTGGCCACGCATCACCGCGACTGGGATGTGAAATTGCCGTTGGTACTCA  
TGGCCATTAGGGCAACTCCTCACGATTCCACCGGCGTCTCTCCATTCGAGGTGATGA  
CAGGCAGACAGATGACACTTCCGCTACATCTGTTATATCAGCCAGGTGGAACAGAT  
ACCTCAGTTGCCTACACAACACAGCAGTACATAGACGATTTGCAGAAACACCTAAA  
ATCCACTTTTGGCTTTTGGCCAACAGCACATGGCACGAAGTGCCAGGGTCGGAAGGC  
CTACTATGATCAGAAGGCGTCTATGACGAGCTTCAGGTGGGAGATAAGGTGTGGT  
ACTACATTTTCGCTCAACCTGTGAGAAACCCCAATCGAATACGGGTAGGCTGGCTC  
GCAAACCTCATGCCTCGCTGGACTGGACCCACACAATCACGGACAAATTGTCCCCG  
GTGGTGTACCAGATCCAGATCAGCCAAGGTTCTAAGGAGCCAACCCGCAAGTGGGT  
ACCCGCAACCAATTAAGCCACACCAAGCCCTATGGGACAAGTCGGGGCCGCCA  
ATGCCTTGATTAGAGTCTAATCAGGTGGACAAAACCCCTGCTAGACCCCTAGGTGTT

TAGCAACTCCTAGCTGTACAACCTGGCAACTAAACTAATAACTTCATTTTTAAAATTT  
AGGAATACATTGATCTTTGATCCATATACAGTAGTCTGTTGTTTGAATTTCAACCCA  
AGTACCATTACACATCTGCCGATCAAGCCAGCCAACAGAACCATCATTTTTGTGCCTG  
GGAATAGGATATCACTGATTGTTAGCCACTTATCTGTTAGATTCTACTTCATTGGTGG  
TTCACACTAGTACACCCAGGTTAATCATGTACATTTGTCTCGTTAGGAAGATGAGGA  
CTCTCCTGCTCCTGACGCTCGTGCTGGGGACGATCGTCGCGGCCCTGATGTGATCT  
CCCCCGGACCTACCTCAGGAGTAGTTCTTAGGGATAAATTCGGGACTACTAATCACAA  
ACTGCCGGTTACATACCCAAAGGGTGTTTGTACGACTGAACCCGGAGGAAGTATGT  
AAAAGAAGTTCCTGATTGGTCCCGCCAAGTGGGGTGGGCTGGGCATTGGTGGGT  
ACGAGAGGCAGTAAGCCATGCCGAACGAGACACCACCCACATGCTACAACAGCTGC  
AAAATTTGCGGTCACACAGTCTGAACTGAATGGGGCTCAAAGAGATCCAAACGG  
TTTCTTGCAGGTTTATTAAGTCTGCTGCCGCCGTGTAGGCTCACTCCTGGCGTCCGCA  
CATCCGCTGTTAATGCCGTGGGCCTAGCCACGGTCCGCCGTAATGTAGGGGAACTAC  
AGGCAGAACTACCACACATCAAGGACCAATAGACACCCAACAGAGACAGCTACA  
GGCAATTGGACAACTTTACAGGGTACCATTGTGGTCCCTCAATACCCACACGGTAGC  
TTTAAACAAAACCTCTGCAAACGATCACCTCCCTGACCCGGGCAATCCAGACAGATAT  
GGCTCACATCCAAGTGATTAACATGCTTTTGAATGACATGCTACAGGAAGTGGGATC  
CTCAGTAGACAGTCTAGCTATGGGCAAGATACCAGCTTATCTGGTGCCTTTAACCT  
GGTACAGGAAATCCTCAGTCGGGCTACCCGAGAGGAAGTTACTGATCTCCAAGCAC  
ATTTAGCCTATACACTCGGAAGTGCAGTACCTCTTTATGTCAATCCAGAAAATAGAG  
AAGTAGCTTTTCTGGTCAACTTACCTATAATAGCTGCGGAAAACATTTATCGCTTAA  
AAAGAGTGGTAAATGTTGGGTTTTGGCAAAAAGAAGCACACATCAAATTCAGACT  
CCGACCTTGGTAGCTTACCAAGACATCAATCCTGGACTTTATCTGGCCCCAAATTTG  
CGCATGTGTACCCTGTCCAAGGATATACACTATCTCTGTCCCAGTAAACCGTTCCT  
CGAGAGGGTGCCGGCAATCTTTGTGGCCTTAAGCCCATGCTCACTAAGGACCAGTGT  
CCTGCCACTGTCACTCATAGGTACCAACAGGTCGAGACTCAGGTTGAAATCGTAGGG  
AGCCGGTGGTTGGTAAATACTGCGGCACGGGAAGCGGTGTTGTCCTATGACCAGCA  
TGATATCGATGAACGTATTCCTTCCCGGAACAACATTTTGGGTAGACGTACCACC  
TGGGGTACTCTGCATGTTGGGGAATGGTCCCTGTACCCTTAGTACCTGATCAATA  
TGAGAGTGAAATTGAGGTGTCTGATTTCTTTACTACCCACTCCTTAGAACTCAGCCCT  
GACACCCTTGGTCGGATACAGTATGAGGGTCCCCAGTCTATCGATTTGACCCCCATC  
ATAATGTCTTAAAAGAGATCGAGGCACGTCCACATGGACAGTCCAACCTGTAAG  
ATACTCCTGGTCATTGCCCGATACCTTGTTAGCTGTGCTGGTATGTCTGGGGTATGTA  
GCAACCTTTGGTATAACGTGTTTTTATCGTAGGAAGACCGTGAAGCTACAGAGACAA  
ATGGATTCATGGTCGGGTAAGGTGGTTAGATTTGTGAGACGTAGAAGGGGGGGTCA  
AGAAGTGTCAAGTGGAACTCAGGAGGACGCAACTGATGAACCTATGCAGGTAGCTG  
CAGTAAGGGAAGTGGTTTAGCTACACACACACACACACACACACACACACACACACAC  
ACACACACACACACACACACACACACACACACACACACACACACACACACACACACAC  
ACACACACACACACACACACACACACACACACACACACACACACACACACACACACAC  
ACACACACACACACACACACACACACACACACACACACACACACACACACACACACAC  
ACACACACACACACACACACACACACACACACACACACACACACACACACACACACAC  
ACACACACACACACACACACACACACACACACACACACACACACACACACACACACAC  
ACACACACACACACACACACACACACACACACACACACACACACACACACACACACAC  
ACACACACACACACACACACACACACACACACACACACACACACACACACACACACAC  
ACACACACACACACACACACACACACACACACACACACACACACACACACACACACAC  
ACACACACACACACACACACACACACACACACACACACACACACACACACACACACAC  
ACACACACACACACACACACACACACACACACACACACACACACACACACACACACAC





TATCTCCTAGTGGGTTATCATAAATTACTTCCCCTTTGGTATATTAAACTGGGTATTGA  
TTTGTATATTTTATCTACTTATACATTTCTGTTGTTTGGGTCTAAAGTGTTTTGAGTT  
ATTCATATATGCGATGAGAAGGTTTGGTTGTAAGACTGTTATCATCAGCGTGCTTGA  
ATTTCACTCTCAAATTGTTGTTTGAATTATGCCCCTTATCTAATTCTGCATATATCCAT  
GTATTACTTTTATTCTAAATAAACATTACTTGATTTAGCCAATTCTTGATTTAAGTGT  
GTTCCCTCCCGTGGTTCAAAGACTTTCTGAAACCGACAAGAACTCCA

> Loki-Ame consensus sequence 5'LTR

TGTTAAGGTTT TAGAAATTATACTTGCAGTTAGGAAACCTATCACAAGTTAGGGCCAA  
TACGTCACGAAGGGAACGTGTTTTCCAATAAAGGGGGATGTTAGTTCATT CAGTAGT  
AGTTCGTGGTTCGCAGTTCGGAGTTCGTGCGCTTTTTAGGTTTAGTTAAGTTCAATTT  
TTTTTTTAAAGTAATTTTAACTTAGAGTTTTAGTTAGAATTTTGTACTCTCTTTTTGGT  
TTACTTTCTCTTAGATTCAGCTTAGTGATTCTTAAGTTCGTGAGTCATAGATCCTAG  
CTCTAGCTGCGCTTGCAGCGCACCCGGGCTGACTAACACAAGTCCAGCGATTATCAA  
CAGAATTAGAGAATTAGGTGCTTCCAGCTATTGAACCACCTTAGCGCTACGGAGCTG  
CCTATAGTTCACCGCTCATACTTAGCGTTATACATCGCTCGCCGTACCAGACCCAGA  
CGCGAAGAGAATCCTGAATCAATCAGCTGCCCGGAGCGAGGCTCCCGCTTGCCGTT  
GGAACCGAAGCCCTGCTTGCACCGTGAAGTCCACCTGAAGAACCCGCTTGCCACC  
TGGATCGAGCTACCCTTCCTGGCGGTTCGACACCGACGGTTCCTTCGCGGCAGAGAC  
GACACCGGTTGCCGAGGCCGGTCAACGCAAAGTGAGGCGCTGGTTAAATCTCTAAT  
TCTCTGGTGGCGTTCTGTTGGTCTGGTTAGGTTGAGTCTTGCTAAGTTTT CAGTTATA  
GGTATTCCGGTTGAGATGGTGGTGATCTCTGTCAGTTCATAGTTCTAATGTAATCTA  
GTTTAACTCAAGTAGCTTGGGTTTAGGGCGTTTTTGCTTCTTTAGTAGTTAGTTCGTT  
TATAGCAGTATATAATCACTTATAATCTTGTTAATCTCCTAATATTCTTATAGTGGG  
TTTAGTTATCCATATTTAGGTTTATCTCCTAGTGGGTTATCATAAATTACTTCCCCTTTG  
GTATATTA AACTGGGTATTGATTTGTTATTTTTATCTACTTATACATTTCTGTTGTT  
GGGTCTAAAGTGTTTT GAGTTATTCATATATGCGATGAGAAGGTTTGGTTGTAAGAC  
TGTTATCATCAGCGTGCTTGAATTTCACTCTCAAATTGTTGTTTGAATTATGCCCCTT  
ATCTAATTCTGCATATATCCATGTATTACTTTTATTCTAAATAAACATTACTTGATTT  
AGCCAATTCTTGACTTAAGTGTGTTCCCTCCCGTGGTTCAAAGACTTTCTGAAACCGA  
CA

> Loki-Ame consensus sequence 3'LTR

TGATTGGGTTTTT TAGAAATTATACTTGCAGTTAGGAAACCTATCACAAGTTAGGGCC  
AATACGTCACGAAGGGAACGTGTTTTCCAATAAAGGGGGATGTTAGTTCATT CAGTA  
GTAGTTCGTGGTTCGCAGTTCGGAGTTCGTGCGCTTTTTAGGTTTAGTTAAGTTCAAT  
TTTTTTTTAGAAAGTAATTTTAACTTAGAGTTTTAGTTAGAATTTTGTACTCTCTTTTT  
GTTTTACTTTCTCTTAGATTCAGCTTAGTGATTCTTAAGTTCGTGAGTCATAGATCCT  
AGCTCTAGCTGCGCTTGCAGCGCACCCGCGCTGACTAACACAAGTCCAGCGATTATC  
AACAGAATTAGAGAATTAGGTGCTTCCAGCTATTGAACCACCTTAGCGCTACGGAGC  
TGCCTATAGTTCACCGCTCATACTTAGCGTTATACATCGCTCGCCCGACCAGACCCA  
GACGCGAAGAGAACCCTTGATCAATCAGCTGTCCGGAGCGAGGCTCCCGCTTGCCG  
TTGGAACCGAAGCCCTGCTTGCACCGTGAAGTCCACCTGAAGAACCCGCTTCGGCCA  
CTTGATCGAGCTACCCTTCCTGGCGGTTCGACACCGACGGTTCCTTCGCGGCAGAG  
ACGACACCGGTTGCCCGAGGCCGGTCAACGCAAAGTGAGGCGCTGGTTAAATCTCT  
AATCTCTGGTGGCGTTCTGTTGGTCTGGTTAGGTTGAGTCTTGCTAAGTTCTCAGTT  
ATAGGTATTCCGGTTGAGATGGTGGTGATCTCTGTCAGTTCATAGTTCTAATGTAGT  
CTAGTTTAACTCAAGTAGCTTGGGTTTAGGGCGTTTTTGCTTCTTTAGTAGTTAGTTC

GTTTATAGCAGTATATAATCACTTATAATCTTGTTAATCTCCTAATATTCTTATAGT  
GGGTTTAGTTATCCATATTTAGGTTTATCTCCTAGTGGGTTATCATAATTACTTCCCC  
TTTGGTATATTAAGTGGGTTATTGATTTGTTTATTTTTATCTACTTATACATTTCTGTT  
GTTTGGGTCTAAAGTGTTTTGAGTTATTCATATATGCGATGAGAAGGTTTGGTTGTA  
AGACTGTTATCATCAGCGTGCTTGAATTTCACTCTCAAATTTGTTGTTTGAATTATGCC  
CCTTATCTAATTCTGCATATATCCATGTATTACTTTTTATTCTAAATAAACATTACTTG  
ATTTAGCCAATTCTTGATTTAAGTGTGTTCCCTCCCGTGGTTCAAAGACTTTCTGAAAC  
CGACA

> Loki-Ame consensus sequence *smc-gag-pol* gene

ATGAGTTCTCCAAGAGAGGCAGGGTCCCCGCTCCTCAGCGAGGCTGAGTCGGTGGGA  
CCAAGTAGAAGCCACTCTTCTTGATTTAGTAAGCTGCCGCATTCCAGACTATGCTGA  
AGGCGTGCAACAGGCAGATGATGCCACCTTCAGAGTTTGATGACTAGCTGTGTGG  
ACGACCACCTAACTAAATCCCTAAAAATAAAAAGAACAAATAGACACCGTGTACAAA  
ATGGCCCTCATACTCTGGAGACAACCTCAACTCTCACAAGAGAGAGAGCAACATGC  
TACTAACCACTGTACAGCTCTCCAGCAAACCTAACCAAAAACCTCAGGGACGAATTGG  
CGCAATGGCATAATACTGGTTCAGAGATACAATCCCAACAAGAAGCCCTTGAACAT  
AAAGTAAAGTCACTGCAGGAAGAGGCCGCAACAGCCACAAAGCTTGCCATCCAGTC  
ACGAGGTAAGCTGGAGGAAGCCAGGAGCAGCAGACCGAACTCGAGGCTGAACTA  
ACACAGGCTATGAGTGCTTTAAGATTAGCTCGTATAGAAAAAAGGGATGCAGAAAC  
GCAGTTGGCAGAGTTCAAATTAGAACGGGATGAGACATATTCCCGGGGGCCAAAGG  
TAAGCCCAACAAAGGGTAGACCAGCGACCCACATCTCTTTAAGACGGAGGTACAT  
ACTCCTACGCCCGTAACTTCCATGGGTTACCAGGGAGGAGCTGAAGCTCCTCGATCA  
CCCATCAGAGTCAAACCGGAACCGGCTGGCCCCAAAAGGTGAACCGGACCCTGTT  
TGGCTGGGACGAATCTGAACACACCCGACGACCCCAAACAAATGCAGATATGGCCA  
GGCCATAACACCCTCAGATAGAGATTTGGATAAAGTTGCCCGCAATATCAGCCGGT  
TTGAACCTAAGCCTGGCTGCCCTAATGATATCCACCTTTATCTAAATGACATTGATTA  
CTATCTACGGCGCTTCCCTCTGGCCACCATAGACGACAGAATCTATCTCATTAAAT  
AACATCCAGCCGCGACGTTAGCAGTTTCATTGAACGCCAACCACCACACGTAAGGG  
GGA ACTATAGGGCTCTCTGCCAAGCATTGGAGGCAGAATTCTCTAGCTTCTCAACCC  
AGTTAGGCCTCTCCGCTGCATTCACGGTGAGGCAGAACAGGCAGGAGGGTCCCGAA  
CAGTACTACTATCGCCTCAGGCGCGCTTACTTTGGCTTCAAGAATGAACCAGAGATG  
GAGGAGGACGAAAATTTCAAGGTCCTGTTTGTCCAGAACCTCCATCCTTCAACCAGC  
CACCATTTAGGTGTCTCGGCTTGTCCCCGCACCCTGACTAGTCGGCAGCTAAGAGAT  
CTAGCTCTTAGAGGCTTTGCAAAAGTTCAGCAAAGTTTGGGTAAAAAAACCGACTCC  
GAGGTCCTTGCAAGTAGCCAGTAACCCTTGATGGA ACTAGAGGGGAAGCACAGCTT  
CCAGGGAACAGATAAGACTCACGGGTCCAGACCCTATAGACAAGAACCAGCCCAA  
GTCAGCAGGTCGATCCACAGCGACGCCGCTCACCTACTTATAAGGTGAATCGCGGC  
CAGGGCAGACCCCATCGAGGTCGAGCCTCCCACCATCAACGTGGTGGCAGGCCACA  
CCATCATGGGAATAACAGGCACTCTGGACCAAACCAGACTGCAAAAAGCCCTAAAT  
CATCACTTGACAAAACCTTAACGGCCTGGAGGCAGGGGATCTTGAGTTAATCCTGC  
AATGGGTAAACCAAATGCGCAAGGAGAAAAGGGGTAACTCAACCAAGGGCGCAA  
CATCCAGGAGCAGTCGAGCACTGCTCCCCATGAAAAAGACCCCAAACGAGCTACTT  
GGGAGCATGCCCAAGACACTGCACCTAGTGCAGTCCTAGTTGTGGA ACTAGACT  
GACCACTCTCTCAAGGAAGAAGACCCATTTCTAATTCCGGGGGGAGCTTCTTTCCGA  
CAGTTCTTGGGCCATCTGAGCGAAAGGGGGGTGGCCAGAAAATTCTATCTTGCTACT  
ACTTTGGAGGATGAATTTGTGCAAGATGCTCTTCTTGACACGGCATCAGACATCACA

CTGATGTCCATGTCCCTTTTTAACCGAGTGCGGGCATCCGCTCGGCGACGGAATAGG  
GAGATACAGCTGAGTAACTGTTCTCTCAATATCCAGCCCTACTCACACACGGGCATC  
ACCATACATTCGATGGCCCTAATTCAACTTACGATTGGGCCCGTACTGTTGTTTCATC  
CAATTCATGTGTCTCCCTTGGAGTCCATCCCATTCCCTCGCAGGAAAAGATCTTCTTAA  
TCGGTTCGAGCCCCTTATCGACTTTCAAGGTCTTAAGATCTGGGCGCAGGTTCCGGCA  
ACCCCTTCCCTGTTCTTCCCTCTCGTGAGGAGGAGATCCAGTGCTACCGTCTTTGTGGA  
CAGTTCCAACCATGCAAGGAACTGATCGACCCCGTGGTTCCTATGGAGATTGAGGA  
AGAGCCTACAGCCGCCGTTTACAGTTTACAAATCCTTCTTGGCCTCCAAGCTCAGT  
CTTGGAAACAACGTGACACCTTCTTGTGTACCATGGTCCCATCTGAAAATCTTGGGGA  
ATATTGTCCCAGAGTGGAGAAGGGGGTACATTGGACGACTTCCAGGTGGATGACG  
TGGTCATCGCCCTGTGGTCGGACAAATCCGCAGTCAGCCAAGACTTAGTAAACTCAT  
TATCGGCAACCCATGCTAGCTTTCATTTCAATCCAGGGAGCTTTTCCGCTTGG  
GCCCGTTCCTCAACCCACCTTGCCGGCAGTCGGCACTTGTTCTTTGACCGTCCGTTGG  
AACAAGAAAGAGTTCACCCAGCTTTTTCTTGTGGTCCCAGACTTACCTCATTCCATCT  
ATGTGGGCGGTGACGTGTTGGTCAGGTTGGATGTTCAAGTAGACACCATCAATAACA  
TCCTTTGGTCCCTCACAAACACTCAGGCAGATGGCTCTTCCCCTGAGCCAGAGTATC  
TGACTCGGGTCAGACCATACTGAAGTTTGTGAGGTGGCAAACAACCAAGCCATC  
ACCCTACCGGCAAATACCAAAAATATCGGCCTCTACCTGACCATCTACCTGGACAA  
CAACTATGTCACCCCATGCACTGTTCCAACCCTCACATCGATTCTTTGATCTTGGTC  
TGACCGTGGAAGCCACACCTCTTGTGGAGTTACGTGCTAGGTCAGTCTACTTGTTCG  
TTCAAATTTGTACAACCCAGGACATAGTGATTCCCAACTCACAGAAGTGGGTTGGC  
TGGTTAGCACCAAATTTTCATGACTTTGAACTGCGGCTTCCAGTCATCGGTCCGATTCC  
TCAGCAGTTGCTCCCAAAGCAAGAGTCCAAGACATTATACACCCGACCGTCTGGGG  
CAATTGCTATTTTTCTGTCTTGGAGACCAATGAAGATGCGTTGTACCGCATTGATCT  
GACCCACAGGGACCAAATGGTCTTGGATACAGTCACTGTCCTTAGTCTCGATTCTGT  
CCCATCACCTGGCACTAACACAGTCTTGGTGAAGCAGAAGGAGGAGGCCGACAGTT  
TTCCTTCAACTCAAACAGAGTTTGGAGAAGCAACTACAGCAAATGCTGTTAGATGCGG  
ATGCATTGCAATCAGACGAAGAGCGTGTAAGCTCAGAACAGTGCTGACTAAGTAT  
CGCGCGTCTTTCTCTCAAGATTCTATGGATTGTGGATTGACCCACATCCATATGATTC  
GTATTCCGACGCATCCCGACGCTGCTCCTGCTTACGTTCCGCAATACAAGATTCCAC  
TTGCATCATACGGGCGGTGCAAGAGATCATAGATGATCTCTTAGACAAAGGAATA  
ATCCGACCATGCAACAGCACCTACTCTGCGCCACTTTGGCCGGTGTGAAGCCCAAT  
GGCAAATGGCGTCTGACTATTGACTATCGCCGCCTAAATGACCAGGTCCCTCTTTCT  
AGATGGCCCATGACCCAATTGGAGCAAGAACTCCCTAGGGTCAGAGATGCCAAATA  
TTTTTCAACCTTAGATGTGGCATCGGGTCTGGACCATTCCGGTCCATGTGGAAGA  
CCAACACAAACTGGCATTACATTGCGCCGGCGTCAATTTACATTCACCCGCTGCC  
ATTCGGATATTCCAATTCACCAGCTGAATTCAACATCTTTCTCAACAAAGCTTGTCT  
GATGCAAGAGAACGAGGAACCTTGATTTATGTTGACGATGTTCTTATCCGGAACAAT  
TCTCTCGATGCTCACTTGGAAAGAGATTGATCATGTGCTAGATCAGCTCACAAAAGCA  
GGTGCGAAAATATCCCTAGCCAAATGTCAGTGGTGCAAAACTAAGGTCAACTATGT  
GGGCCTTTTGGTTGGTCCAGATGGTGTCTCCCGCAACCATGTCGTGCCCAAGGCAT  
CGTGGATATCGCGGAACCAAAAACCATCCACGCCCTTCGCAGCTTCTTGGGGGTATG  
CAACTACTCCCGCCAGTTCATTGAAAACCTTTGCGGAACTGGCCAAGCCACTGTACCA  
GCTGTTAAAGCAGGATGTACCTTTCATTTGGGGTGAAGGCCAGGCACAAGCCATGCA  
AACCTCAAAGACAAACTGGCATANGACAAACTGGCATTACATTCGCCGGCCGTC  
AATTTACATTCACCCGCTGCCCATTCGGATATTCCAATTCACCAGCTGAATTCACAT

CTTTCTCAACAAAGCTTGTCTGATGCAAGAGAACGAGGAACCTTGATTTATGTTGA  
CGATGTTCTTATCCGGAACAATTCTCTCGATGCTCACTTGGGAAGAGATTGATCATGT  
GCTAGATCAGCTCACAAAAGCAGGTGCGAAAATATCCCTAGCCAAATGTCAGTGGT  
GCAAAACTAAGGTCAACTATGTGGGCCTTTTGGTTGGTCCAGATGGTGTCTCCCGC  
AACCATGTTCGTGCCCAAGGCATCGTGGATATCGCGGAACCAAAAACCATCCACGCC  
CTTCGCAGCTTCTTGGGGGTATGCAACTACTCCCGCCAGTTCATTGAAAACCTTTGCG  
GAACTGGCCAAGCCACTGTACCAGCTGTTAAAGCAGGATGTACCTTTTCAATTTGGGGT  
GAGGCCAGGCACAAGCCATGCAAACCCTCAAAGACAAACTGGCATCGGCACCCTG  
TTAACCTATCCGGACCACAGCAGAGAATTCTACCTTCAAGTTGGGTTTTTCAGAGCA  
CTGTGTGAGTGCTGGTCTATAACCAGGTACACGATCGAGACAAGAGAGTGGTGGCTT  
ATGCAAGCAAAGCTTTGATGGCTCCGGAACCTCAAATACTCTGACTGTGAGAAAGCA  
CTTCTGGCCACGGTCTGGGCAGTGAAACACTTCTCCAACCTACCTTGGGGGACAAAAG  
ATCATTGTAGAAACGAACCACCAGCCAGTGGTCTTTCTCAACAGTCAGCGCATTTCGA  
GAAGGTGTGGTCACCAACGCACGAGTCGCCTCCTGGTTAATGGCCCTACAAAGTTTT  
GAGGTTGAGGTGCGCTATGCGCAAAACTCGAGATTACCTCTAGGCACTGATCTGGCG  
GCATGTCAGCGATGTGAAACTGACATAACGGCCACATCAACGCCATTCCCAATCTC  
GCCTCCCAAAAACCCACAAACCATCGTTACTTTGACCCCAAGGAGTGTGAAAACATT  
CCCACGGTCTACGTAGATGGATGCTCTTTCCGACATGACCAAGAAGGCCTCAAAGCC  
GGTGCAGGAATCGTCTGGCTTGATGACAATCCTTGCGAACCACAACAGTTCAAACCTA  
GGATCACAAACTTCTCAGTATGCCGAAATCGCTGCCATACTCATCACAAATTCAACTT  
GCTATCGACCAGGGGGTAAAAACCCTGGTAATCTGTACAGATTCCAACCTACGCACGT  
CTAAGTTTCACATGTCACTTGCCAATCTGGAAAACCAAGGTTTTTCTCACATCTGGC  
AGGAAAGCAGTCAAACACACAGAGCTGTTACAGCCGCGGACTACCTGGTAGTTTCG  
GCATGACATGCTTGTCTACTGGAAAAAGGTGAGGGGACACTCACGTGTCCAGGGA  
CAGACAAGACATACAATGATCAAGCTGATTCACTGGCCAAAAGAGGTGCCTTGAA  
GGAGTTTCATGGGTCTTTGACCCGTTGAAATACCCAACCCAACCCAACCCCACTGTT  
TTAGCCGTGACTAGAGCACAAAGCTAAACAAACCTCAACAACAGAAATCCCACCCTG  
CGCTGCGGTCTCCATTGATCCAGAAATCACAGATGCTGATTTGATCACGCTACAAGA  
CGCAGACCCCGACATCAAATCTATTAAGGCTTTCTTGCTTGATCCCACCAACAATCC  
CATAACCAGCCAAATGCTGGAGGCATCAATTCCGCTTAAACAACCTTTGGACAACC  
GCGCATTCTTGAAGGTGGTCAAGGGCTTGCTTGTTTCATGTCACTGAGACCCACACTT  
CTCCTGCGTTTCGTGGTGCCCTCCGTGCCACAGGGGGGTAATGTTGGGGCACGCCATG  
ACTCTCCATCAGCAGGTCAAAAGGGATCAAGGAAACCTATAGGACACTCAAACAG  
GTGGCCTTTTGGCCACGAATGCGGGAGCATGTAGCTAGTTACATTAAGGATGCTTG  
GTGTGCTGCCAGTTCAGCCGGCGAATCCTCTGCACAGGGCTCCCTTACAGAGAAAG  
GGGTTAACCTTCCCCTGGTCCGATCTGCAAATGGATTGGGTGGGCCCCGCTCACAAAG  
TCTGCTCGAGGGAACAAATATTTCTCACAGTCACATGTGCATTACCAAGTGGGTG  
GAGTGTCTTCCAGCCGCAATGACACCGCTATAACCACAGCGTGTCTCTGGTTAAT  
CATATCTTACCCGGTTTGGTCTTCTTGTAGGGTTGACTCAGATCGAGGTAATCATT  
TCACGGCAGAAGTCATGCAACAAATGTGGCACGTCTCCTCGGTGTAAAAGCCAAGTTG  
CACGTGAGCTACCACCCCAAGTCTCTGGTCAGGTCGAACGGGCTAACCGCACAGT  
GGTCAGCATCCTCAAGAAATTTGTGGCCACGCATCACCGCGACTGGGATGTGAAATT  
GCCGTTGGTACTCATGGCCATTAGGGCAACTCCTCACGATTCCACCGGCGTCTCTCC  
ATTCGAGGTGATGACAGGCAGACAGATGACACTTCCGCTACATCTGTTATATCAGCC  
AGGTGGAACAGATACCTCAGTTGCCTACACAACACAGCAGTACATAGACGATTTGC  
AGAAACACCTAAAATCCACTTTTGGCTTTTGGCCAAACAGCACATGGCACGAAGTGCC

AGGGTCGGAAGGCCTACTATGATCAGAAGGCGTCCTATGACGAGCTTCAGGTGGGA  
GATAAGGTGTGGTACTACATTTTCGCTCAACCTGTGAGAAACCCCAATCGAATACG  
GGTAGGCTGGCTCGCAAATCATGCCTCGCTGGACTGGACCCACACAATCACGGA  
CAAATTGTCCCCGGTGGTGTACCAGATCCAGATCAGCCAAGGTTCTAAGGAGCCAA  
CCCACAAGTGGGTACACCGCAACCAATTAAGCCACACCAAGCCCTATGGGACAA  
GTCGGGGCCCAATGCCTTGATTAGAGTCTAA

> Loki-Ame consensus sequence Smc-Gag-Pol polyprotein

MSSPREAGSPLLSEAESVDQVEATLLDLVSCRIPDYAEGVQQADDAHLQSLMTSCVDDH  
LTKSLKIKEQIDTVYKMALILWRQLQLSQEREQHATNHCTALQQTNQKLRDELAQWHN  
TGSEIQSQEALHKVKSLEEEAATATKLAIQSRGKLEEAQEQQTELEAELTQAMSALR  
LARIEKRDAETQLAEFKLERDETYSRGPKVSPTKGRPATPHLFKTEVHTPTVTSMGYQ  
GGAEAPRSPIRVKPEPAGPKKVNRTLFGWDESEHTRRPQTNADMARPITPSDRDLKVA  
RNISRFEFKPGCPNDIHLYLNDIDYYLRRFPLATIDDRIYLIKITSSRDVSSFIERQPPHVRG  
NYRALCQALEAEFSSFSTQLGLSAAFTVRQNRQEGPEQYYRLRRAYFGFKNEPEMEED  
ENFKVLFVQNLHPSTSHHLGVSACPRTLTSRQLRDLALRGFAKVQQLGKKTSEVLAV  
ASNPCMELEGKHSFQGTDKTHGSRPYRQEPAQSQQVDPQRRRSPTYKVNRRGQGRPHRG  
RASHHQRGGRPHHHGNNRHSGPNQTAKSPKSSLDKTLNGLEAGDLELILQWVNQMRK  
EKRGNLNQGRNIQEQSSTAPHEKDPKRATWEHAQDTAPSAVLVVELDTHSLKEEDPFL  
IRGELPFRQFLGHLSEKRVARVYLAATLEDEFVQDALLDTASDITLMSMSLFNRVRASA  
RRRNREIQLSNCSLNIQPYSHGTITISMAILIQLTIGPVTVVHPIHVSPLESIPFLAGKDLLN  
RFEPLIDFQGLKIWAQVRQPLPVLPSREEEIQCYRLCGQFQPCKEIDPVVPMEEIEEPTA  
AVSQFTNPSWPPSSVLEQRDTFLCTMVPSENLEGEYCPRVEKGVTLDDFQVDDVVIALWS  
DKSAVSQDLVNSLSATHASFHFIQSQGAFLGPVQPTLPAVGTCSLTVRWKKEFTQLF  
LVVPDLPHSIYVGGDVLVRLDVQVDTINNILWSLTNTQADGSSPEPEYLHSGQTIPEVCQ  
VANNQAITLPANTKNIGLYLTILPGQQLCHPHALFQPSHRFFDLGLTVEATPLVELRARS  
VYLFVQNCTTQDIVIPQLTELGLVSTKFDHDFELRLPVIGPIQQQLPKQESKTLTYTRPSG  
AIAIFPVLETNEDALYRIDLTHRDQMVLDTVTVLSLDSVPSPGTNTVLVKQKEEADSFPS  
TQTEFEKQLQQMLLDADALQSDEERVKLRTVLTKYRASFSQDSMDCGLTHIHMIRIPHT  
PDAAPAYVRQYKIPLASYGPVQEIIDLLDKGIIRPCNSTYSAPLWPVLKPNGKWRLTID  
YRRLNDQVPLSRWPMTQLEQELPRVRDAKYFSTLDVASGFWTIPVHVEDQHKLAFATFA  
GRQFTFTRCPFGYSNSPAEFNIFLNKACPDARERGTLIYVDDVLIRNNSLDAHLEEIDHVL  
DQLTKAGAKISLAKCQWCKTKVNYVGLLVGPDGVLPQPCRAQGIVDIAEPKTIHALRSF  
LGVCNYSRQFIENFAELAKPLYQLLKQDVPIWGEAQAQAMQTLKDKLAXDKLAFATFA  
GRQFTFTRCPFGYSNSPAEFNIFLNKACPDARERGTLIYVDDVLIRNNSLDAHLEEIDHVL  
DQLTKAGAKISLAKCQWCKTKVNYVGLLVGPDGVLPQPCRAQGIVDIAEPKTIHALRSF  
LGVCNYSRQFIENFAELAKPLYQLLKQDVPIWGEAQAQAMQTLKDKLASAPCLTYPD  
HSREFYLQVGFSEHCVSAGLYQVHDRDKRVVAYASKALMAPELKYSDCEKALLATVW  
AVKHFSNYLGGQKIIVETNHQPVVFLNSQRIREGVVTNARVASWLMALQSFEVEVRYA  
QNSRLPLGTDLAACQRCETDIPATSTPIPNLASQKPTNHRYFDPKECENIPTVYVDGCSFR  
HDQEGKAGAGIVWLDDNPCEPQQFKLGSQTSQYAEIAAILITIQLAIDQGKTLVICTDS  
NYARLSFTCHLPIWKTKGFLTSGRKA VKHTELFTAADYLVVRHDMLVYWKVVRGHSR  
VPGTDKTYNDQADSLAKRGALGVSWFVDFPLKYPTQPNPTVLAVTRAQAKQTSTTEIPP  
CAAVSIDPEITDADLITLQDADPDIKSIKAFLLDPTNNPITSQMLEASIPKQLLDNRAFLK  
VVKGLLVHVTETHTSPAFAVPPCHRGMVGLGHADSPSAGHKGIKETYRTLKQVAFWPR  
MREHVASYIKGLVCCQFQPANPLHRAPLQRKGLTFPWSDLQMDWVGPLTKSARGNK  
YFLTVTCAFTKWVECLPAANDTAITTA CLLVNHFTRFGLPCRVDSDRGTHFTA EVMQQ

MWHVLGVKAKLHVSYPQSSGQVERANRTVVSILKKFVATHHRDWDVKLPLVLMAIR  
ATPHDSTGVSPFEVMTGRQMTLPLHLLYQPGGTDTSVAYTTQQYIDDLQKHLKSTFAFA  
QQHMARSAQGRKAYYDQKASYDELQVGDKVWYYIFAQPVEKPOSNTGRLARKLMR  
WTGPHTITDKLSPVVYQIQISQGSKEPTRKWWHRNQIKPHQSPMGQVGAANALIRV\*

> Loki-Ame consensus sequence *env* gene

TTGTTAGCCACTTATCTGTTAGATTCTACTTCATTGGTGGTTCACACTAGTACACCCA  
GGTTAATCATGTACATTTGTCTCGTTAGGAAGATGAGGACTCTCCTGCTCCTGACGC  
TCGTGCTGGGGACGATCGTCGCGGCCCTGATGTGATCTCCCCGGACCTACCTCAG  
GAGTAGTTCTTAGGGATAATTCGGGACTACTAATCACA AACTGCCGGTTACATACCC  
AAAGGGTGTGGTACGACTGAACCCGGAGGAAGTATGTAAAAAGAACTCCCTGAT  
TGGTCCCGCCAAGTGGGGTGGGCTGGGCATTGGTGGGTACGAGAGGCAGTAAGCCA  
TGCCGAACGAGACACCACCCACATGCTACAACAGCTGCAAAAATTTGCGGTCACAC  
AGTCTGAACTGAATGGGGCTCAAAGAGATCCAAACGGTTTCTTGCAGGTTTATTAA  
CTGCTGCCGCCGCTGTAGGCTCACTCCTTGGCGTCGGCACATCCGCTGTTAATGCCG  
TGGGCCTAGCCACGGTCCGCCGTAATGTAGGGGAACTACAGGCAGAACTACCACAC  
ATCAAGGACCAAATAGACACCCAACAGAGACAGCTACAGGCAATTGGACAACTTT  
ACAGGGTACCATTGTGGTCCTCAATACCCACACGGTAGCTTTAAACAAA ACTCTGCA  
AACGATCACCTCCCTGACCCGGGCAATCCAGACAGATATGGCTCACATCCAAGTGA  
TTAACATGCTTTTGAATGACATGCTACAGGAAGTGGGATCCTCAGTAGACAGTCTAG  
CTATGGGCAAGATACCAGCTTATCTGGTGCCTTTAACCCTGGTACAGGAAATCCTCA  
GTCGGGCTACCCGAGAGGAAGTTACTGATCTCCAAGCACATTTAGCCTATACACTCG  
GAAGTGCAGTACCTCTTTATGTCAATCCAGAAAATAGAGAAGTAGCTTTTCTGGTCA  
ACTTACCTATAATAGCTGCGGAAAACATTTATCGCTTAAAAAGAGTGGTAAATGTTG  
GGTTTTGGCAAAAAGAAGCACACATCAA AATTCAGACTCCGACCTTGGTAGCTTACC  
AAGACATCAATCCTGGACTTTATCTGGCCCCAAATTTGCGCATGTGTACCCTGTCCA  
AGGATATACACTATCTCTGTCCCAGTAAACCGTTCACTCGAGAGGGTGCCGGCAATC  
TTTGTGGCCTTAAGCCCATGCTCACTAAGGACCAGTGTCTGCCACTGTCACTCATA  
GGTACCAACAGGTCGAGACTCAGGTTGAAATCGTAGGGAGCCGGTGGTTGGTAAAT  
ACTGCGGCACGGGAAGCGGTGTTGTCCTATGACCAGCATGATATCGATGAACGTATT  
CCCCTCCGGAACAAACATTTTGGGTAGACGTACCACCTGGGGCTACTCTGCATGTT  
GGGGAATGGTCCCTGTACCACTTAGTACCTGATCAATATGAGAGTGAAATTGAGGTG  
TCTGATTTCTTTACTACCCACTCCTTAGAACTCAGCCCTGACACCCTTGGTCGGATAC  
AGTATGAGGGTCCCCAGTCTATCGATTTGACCCCATCAATAATGTCTTAAAAGAGA  
TCGAGGCACGTCCCACATGGACAGTCCAACCTGTAAGATACTCCTGGTCATTGCCCG  
ATACCTTGTTAGCTGTGCTGGTATGTCTGGGGTATGTAGCAACCTTTGGTATAACGT  
GTTTTTATCGTAGGAAGACCGTGAAGCTACAGAGACAAATGGATTCATGGTCGGGT  
AAGGTGGTTAGATTTGTGAGACGTAGAAGGGGGGGTCAAGAAGTGTGAGTGAAAC  
TCAGGAGGACGCAACTGATGAACCTATGCAGGTAGCTGCAGTAAGGGAAGTGGTTT  
AG

> Loki-Ame consensus sequence Env protein

LLATYLLDSTSLVVHTSTPRLIMYICLVKMRLLLLTLVLGTIVAAPDVISPGPTSGVVL  
RDNSGLLITNCR LHTQRV FVRLNPEEVCKKNFPDWSRQVGVWAGHWVREAVSHAERD  
TTHMLQQLQKFAVTQSELNGAQKRSKRFLAGLLTAAA AVGSLLGVGTSAVNAVGLAT  
VRRNVGELQAE LPHIKDQIDTQQRQLQAIGQTLQGTIVVLNTHTV ALNKT LQTITSLTRA  
IQDMAHIQVINMLLNDMLQEVGSSVDSLAMGKIPAYLVPLTLVQEILSRATREEVTDL  
QAHLAYTLGSAVPLYVNPENREVAFLVNLPIIAAENIYRLKRVVNVGFVWQKEAHIKIQTP

TLVAYQDINPGLYLAPNLRMCTLSKDIHYLCPSKPFTREGAGNLCGLKPMLTKDQCPAT  
VTHRYQQVETQVEIVGSRWLVNTAAREAVLSYDQHDIDERIPLPEQTFWVDVPPGATLH  
VGEWSLYHLVPDQYESEIEVSDFFTTHSLELSPDTLGRIQYEGPQSIDLTPINNVLKEIAR  
PTWTVQPVRYSWSLPDTLLAVLVCLGYVATFGITCFYRRKTVKLRQMQMDSWSGKVVRF  
VRRRRGGQEVSVETQEDATDEPMQVA AVREVV\*

>Loki-Dcl consensus sequence

TGCTACGCACTGTAGCGTCTGCGTAGGATCACAGATGGTTGATCTTCAAAGAACCTT  
TTAACCTGTGACATTTACATAACCAATTACAACCCTGGACCCTCACTCTGATCGTCCC  
GTCTTCCCCCACTGTCACAAATGTAGCGTCTGCGTAGGATCATAGATGGTTGATCTT  
CAAAGAACCTTTTAACCTTTGACATTTACATACAAATTACAACCTGGACCCTCAGCC  
TGATTGTCCCGTCTGCCCCCACTGTCACCAAGACGATGCGAAACAGACGGGGTCTGC  
AAACTGCTCATCGGGGCTCCAAGCTTCAAAGCATTCCAAGACCTCCTGCCTGGCCC  
CACCGTCGCAATACACAATCACGCACACACTTAAACATATTGTCTGTATCTTGTGC  
TAGGAATATGTGATTATAAGTGGATCCCGTATATGCACGCGTTGTGTGTACGTTCCC  
TTGTATGAATTATACTAGTTACAACCTTTCTATTGTACATTAGGTAAACTTTAATTACC  
TATAATTAAGTGTATAAGTGTATCTCTACTTTTCTACCTCCTAAAGGTCCCTTTCTTG  
GTGTCAGAAGGAACCTTCTCTTTACTACTGGAACAGTGATGCATACCATGTGATCACA  
AAATACATCATACAATTTCTATAAGGTAGAAATTGTAACCTGCAACAACTACAGTCT  
CTCTCTGGACCAGCCATAAACATTCCGGTTCAGTCGTAACCCAGACAAAGGGAACT  
TCTCCCGCCAAAATGTCACACTTGTGATTGGCTATTCAGGCCACATGATGGGCGTGC  
CAGAAAACATTCAAAAAGGAGCGTCACACAGGCACGAATGCTCAGAACTTCTCTTC  
TTCCTTCCGAGACACCTTTTCTTTCAACACTTTGTTACTCTTTGGCAAATTTACCTTC  
AAGGAGAACCTCCAGCGCCAGACCTAAGGATCGAGGATCGTGACCCTACCGCATCA  
GGACTCTTTTGCATGAAATAAGGACCAATGCAAGTAACTATTTAGATGCACGTTTAA  
ACCCCTTTTTAAGGTGAACTTAAGAATTCTCTGACGATTCTCATTAGGCTGTGGTTAA  
TTGATGTGTAATACTGCCATTCTCTTTTCATCACTTTCCTTTACCCTGTATGTATATGT  
TTGTCTAATTGTTGTATGTTAGCTATAGCCGTGTTTATTA AATTCTTTAAATTCACAA  
TCGTTTGTCTGTGTGCTGCTCACAGCTGAGTCACTGAACGTTGACCTTTTAAGCTA  
CATGCTAAGTTACTGCTAGCACGCAGAGTCGGGAAAGCTACCTTTCCTGGCCAAGAG  
GGGGGATAATCGTTCCAGAAATTGATAAATAATTATATTATCTGCTCCGTGGACGGA  
CAGATCAAGTAATTGTAACATTAATTCTGCTACAGTTTATCCCAAATCTAATCTAA  
ATGTTTATTATTAATTATAACCAGTTATAATTAATTCTAGATATTTCTCTTGAGCTA  
ATTCGTTACATTTAATGGTGGAGAATGCGGGCAGTTCAAACTTATTTTGTGAGCAA  
ACTCAGTAACAATCTTTTTGTGTTTTTATGCAAGCTTAAAGTGAGGCAAGACTCACT  
CTCGTGATTGGTTGGTTCAAGACCACCTCCATATGTGTATTTCAACAGCCATTGTCTG  
TTAAAGTACACAGCCATTAGTTCATAATATTA AAAATTGTGCTGTAAAGACGAAGAAA  
TCTCTTTGCTGTACATTTTAATATTATCAGATCGCCTGTTGGAACGAAGAAATCTTCC  
TTCATCGCGATAAAGATTGATTTGAGCGACGTTCCCTCTTGTCATCTTTTATAGGCCT  
TATTCGTA AATGAGAGCCCTAAATGCATATGTGTAGAAACAGCTAAGGAACCCTGTT  
TTTAATTGTTAGTGTGTAAGAGGGCGGCGAAGAAATCCTGCCACACATTGCTGTGCA  
ACTAACTGCATTTGTGTA AAAACGGCGAAGAAATCCCGTTTTTAATTTTTAGTGTGT  
AACAGGCAGCGAAGAAATCCTGCCACACACCCCTTTTGGTGCAGCTAAATTGCATTT  
GTTTTAAAGCAGCGAAGAATTCCTGTTTTTAATTGTTAGTGTGTGAAAGGCAGCGAA  
GAAATCCTGCCACACCCTGTCTAACACTCCTAAATTCCA ACTCCACCCCTCTGTTCT  
AACCCCTGGGGCTCACCCACGCCACCTTGTGGCCGGTCTCAGTAGGTGGGTTTTCTT  
GGTTGGTTGGCCTAAGCCTGCCAGTTTATCTGAAAGGCTTAGTCTGACTCTTTGCCTC

TTAACTTGATTCTTGTTATTACTGAGTCAAGCCTCTCTCTCCTGTTTATGATTTATTT  
AAATTTAGTCTAAACAGTGTTTGAATTTAAATTTAGAATCGATTTCTATATTCTACAC  
CTGTGTGTTTACTTATAGGTAGTGCTCCCCCTCAATCCTATACCTCTCCTCTGTGTTTG  
GCGTATTTGTTTGTCTTACCTGGTTTCTGTTTGTTTACCAAACCTTTGAGAATC  
ATCAGGGAAGGCTGAGTAATACATTGACAACCCAAGCTGCCAAAGTCTTAAGACTG  
TCACGCGGTCAAATCTAAGTACTATAGGCGCAGTCATTAACACTGGTAGGACTTGCA  
TTGGTTTTGTTTTGTGCTGTCCCTCTCTCTCGCTCCCTTTCTCTCCCTCTCTCGCTGA  
CCAGCAAGCCAACATGTCTCGATCATCCAGCCCTGAGGCCACTGGGATCGTCTAGA  
AGTCTGGCTGAACGCCCTGACTAGCAATCTTCTTCATGAACCCACCGGGGACCTGCA  
GAACCTGAGCCAAGAGCAGATTGACGACAACCTGAGCATCTTGATGGCCCGCATC  
CGACGCAGGACTACAGCCACAAGGAGCTGGCCAAGATCACCGCGTCACTGGCTCAC  
AACCTCCTCGGCCAGGCAAAGCTGAGTGAAGCAACAATCCACCACCAGGAACGGCA  
GACTGCAGCACTAAAGCTTCAGGATGAGAGAGCACAGAGGAATCTGACGCTCGTTC  
GAAGACAACCTGGAGCAACTGGAGACTCAGGACAGGACAGCACACAAACAGCACCC  
AGAGCTACAGGAGGAATTGGAGAGACTCCAGAACGCCTTGACTGATCTCCGCGCGG  
ACACAGCACACCGGGAAGAGCAGGAAAAGGACGCCAGAGAAGAGCTGAGGGAAG  
AACTCAACGAGGCTAAGACCCTCCTGATGAGAGCAGAGACTGAACTTAAAGAAAGA  
GAAGCCTGGGCAAGGGCCTGTGAGGGCCACCTGCAAACCTGCCCGGGCCGAGGTCAG  
TACTCTGTCCCAACAAAGAGACTATCTGAAAGATGAACTTGACACAGTTTCGCAGAG  
AGCTCAAGCACTCATATAGACTGCACGATGACCCTAGAAGAGAGATGCACCCCGCA  
GAGTTTCCCCTAACCCAGCAGCAAAAGGGAGGAGAGCCAGTGCTCAGGACATCACC  
TGCCAGCATCCCAAACCCCCCGCCAGCAGCAAGGGGGTGGGAACCCTCTCAAAGAC  
TACATTCCAGTCATGGCGTGTCAACCAAAGAACTGGATAAGCTGGCGAGGAACATT  
CCTATTTTCACTCCCAACCCTGCAGGAGGCCATGATGTCCACTCATACCTCGATGAT  
GTGGACTTCCACTTGCAAACCTGTTGCTAACGTTACCACACGCGACAGACTTTATCTG  
CTCAGAATCACTGCTAGCCGTGAGGTGCGCAGTTTCTGGACCGACAGCCAGAGAG  
CGTCAAAATGGATCATCAGCAACTGCAGCAAGCGCTAATCAGGGAGTTCTCTGACC  
CAGAGTCAGAGCATGGACTGATCACTGCCATGGACCTTAAACAGGGCAGACAGGAA  
ACCACGCAAGCCTACTACAACAGACTCCGACAGGCCTACTTCGGAGCACGCAACGA  
GCCAGGAATGGAGGACGATTTCAATTTAGATCCCTGTTCCCTCCGGAACCTGCACCC  
CACAGTAAGTCACTATCTGGGGGTTCTGGCATGCCACGGACGATGTCCACCCAACA  
GCTGAGAGACTTGGCCCAAGGCCCTTCGCCAAACAAAGAGCTGTTTCGGAAAAGA  
CAGCGAAAACCCACACCATCTATCCTGTCTCCACTCAGAGTGCAGAACTCACTCTAG  
AGGGCGCCGAGCAAAGCCACCATGACAACAGATGGTCACGAACCTTTCCAGCCAAC  
AGGGGGCAGCGTGGACATGACGGGGCCCGACACAAACACCAAACCTGGTCATTCCGG  
AAGATCCTGGGACAGGTCACAACCACCCTCCAACCCAAGGGATGAAGCCACATGGG  
AAGGAAAGAGACGACCCAGAAGGAGCCAATTTTCAGCAACACAAGCGTCAAGATC  
AGATTGGCAGCAGCCGAACCCTTCTCAACACTCTCTGGATCAGTCCAGATTTAAATC  
ACCAGCAGGACCAAACCTGGGAAGCCACATCTGAAGCAGCAGAGATTATGAGAGTTT  
TGAAGGAACTCCTCCAGGAAAGGCACCACAGGGGGGACAAAAAGGATGAGTCAGA  
TCAGGCATGACTAAGCGTGCAGTCTGACCCTATCACCCAATCAAAGTCCCCTCAACA  
TAATCCTCCCAACCAACTCAAACATAATCCTCTGCTGACCACAGAACGAGAGGTCCC  
ACCACCAAGTGATATCACGCAACCACAGCAGATGACTACAGAACCACCAGAGCCAG  
CCAATTTCCAGCATCACACCTCAAGCCAGGACCTTGATGTACCTGAGAGTGCTGTCT  
TGGTGGTCTGTCTGCCGGAAGAGTCACGGGAGACTGGTCCTGACTGCTTACCGATTA  
CCACACAAGCCCAATACCAAGACTGTTGGGGAACCTAATTGAAAGGGGGGTAGCC



AAGAAACTGTACCTGACCACCACTTTGGAGAATGAGGTAAGGCTAGAGGCCCTGGT  
GGACACGGGAGCAGACCTGACTCTGATGTCAGCCCAGCTTTTCGACAGACTTCAGAT  
TGCTGCCAAGAGACAGAATCGAACTCTCGAATATAAGAAGTGTGTGCTGAACGTAC  
AATCATACAGCCAAAATGATGTACAAC TAGAACA ACTAGCTCCCATTCACCTAACC  
ATCGGCCCTATGACCTTAGTACACCCTGTGTACATCTCTCCATTTGACACATAACCCTC  
TCCTTATTGAAAAGACCTGCTAGACCGCTTTGAGCCCCTATTGGACTTCAAACATC  
TAAAAATTTGGGCTCAAGTGCGAGAACCTCTGCCTCCTCAGTCACCAAGATCACGCC  
AGACAGACTGCCAGGTCACAAAGGCCACAGAAGGTCTCGCCAACA ACTGCGGGAAC  
ACACCGACCAAGAGCAAGGTTCAAGGTCATCACTATGCACTTTCCAGCTAGCTAA  
AGACTCTGACTCCCACGGCCCTCAGGTTATGGGGGCCTTACAGCTGAATGATGTCAC  
AACAAACAGACTCTGTGCTTGCCTGTGGGCAGACA ACTCAGCAATCAGCTCCTCACT  
GTTCAATGCTCTCATAACAGCAAACAGGGAACGTCCCTACTGCCAGCAAACGTACCC  
GCTTCCCTCTGAATCCCTGCCTGTCAACTATGGTAACCGCCAAGTGCATCTGTGCTCT  
GAACCTGAAGTGGAATGACAGATGTTTGACGCATTACTTCTGGTCCCTCCCAGACAT  
ATCACATGACGTGTACATTGGAGCGGACATTTTGATTTCGCCTCAGGGCTCATGTGGA  
CATGATCAATGACGTGGTATGGGCTCCAACAACCTCACAGGCCCCCACTGTTCCCGT  
CAAACCTTAAAAACCTCCAGTCAGGTCAAACCATCCCTGAGGCCTGCACAATGGTCA  
GTGAAGAAGAACTGTAATACCAGCCTACACCAAAGGGGTCACTGTTGACTCAAC  
CTGCGATCTGGTCAGACCTGCAGCCACACATTGGGCTTCTTCCAACCCTTGCTGAG  
TGTGGGGAACCTGGGCCTCACTCTAGAAGCTACACCCTTGTGAAATAACATCCCGG  
GCAGTGTACATACTGTTCAATAACTGCACCGCAACGGATGCCAAAGTGCCTAAGGC  
CCACCGCCTGGGTTGGCTAGTGAGTTACGACTTTCATGACTTCGAACTGATCCTCCC  
AGTAATTGGACCCATCCCAGAGTCAATGATTCCGGAAGAAAGCTCGGGCAACTCAG  
TGTCAACAGCACCATTCAAGACCATCACCATAGCTTCAGTCATGCCAGTAGTCAAAG  
AGCAGGTGTGTAGAACGGAGCTGACAGAAGACCAACATCTTGCAGTGTATACAGTC  
TCTAACCACTACCAACAAAATGACAGAAGAGCCATACCCAGGTTTTTGAGACCCA  
AGTCCAGCAAATTCTGAAAGACGCCGATGCCATACAGGAGGAGGCAGACCGCCAAA  
AGCTCCGCCAAGTCTGTACAAATACAAAGAATCATTTGCCAAGGACCCTTTAGACT  
GTGGCCTCACTAATCTTACGTGATGCGCATACCAACACACCCGAAAGCTCCTCCCA  
CTTTCGTCAAGCAATACAAGATACCCTTAGAATCGTACGAACCCGTACAAGAGATCA  
TCGATTCTATGCTCGAAAAAGGCGTTATTTCGGCCATGCAACAGCACCTATTCTGCCC  
CAATTTGGCCTGTCCCTCAAACCAATGGCAAGTGGCGACCAACCATCGACTACAGA  
AAACTGAACCAGCAGGTACCATTATCACGGTGGCCCATGACCCAGCTCGAACAGGA  
AATCCCAAGAATCAGAGGGGCCACCATCTTCTCCACGCTTGATGTGGCCTCAGGATT  
TTGGACTATACCGGTACATCCAGATGACCAACATAAGCTGGCTTTCACCTTCAGTAA  
CCGGCAATACACCTTCAACAAGGTGCCCATTCGGCTATGCCAACTCACCTGCCGAATT  
TAATATTTTTCTTAACAAGGCGTGTCCAGATGCAAGAGTGAGAGGGAACCTAATCTA  
TGTTGATGATGTTCTCATGAAAAGCATGACCGTGGCCGATCACCTGAAAGAAATTGA  
CCACGTGTTGCACCAACTGACTGCCGCTGGTGCCAAGATCGCCCTTCAACAAGGGACA  
ATGGGGAAAGTCTAAGGTTAACTATGTAGGTCTACTCATCGGACCACAAGGTATCG  
AGCCTCAATCCAGCCGCATTCAAGCCATCCAGACCATCAAGCCACCTGTCAATGTCT  
CAGA ACTCAGAAGTTTTCTCGGCGTGTGCAACTATTCACGGCAATTTATCGAAA ACT  
ACTCAGACATTGCACGCCCTCTCACTACACTGTTGAAGAAGGACTGCCATTTGCCT  
GGACAGAGGATCAGCAAGAAGCTATGGATGAACTGAAACGACACCTGTGCACTGCA  
CCATGTCTGGCCTATCCTGATCCACAAAACGAGTTCTATTTGGACGCTGGATTCTCC  
AGCCACTGTCTCAGCGCCGGGTTATACCAACGACTGGACCAGGACAAAAGGGTGGT

AGCATATGCCAGCAAGACTCTTCTTCCCCCAGAGTGTAATACTCAGACTGTGAAAA  
AGCCCTGCTCTGCACTGTGTGGGCCCTACAAAGATTCTCTAACTACATTGGAGCACA  
GAAAGTTATAATAGAAACCTGCCACCAGCCGGTCACATTTCTCAACAGCCAGCGCA  
TCAGAGACGGAGTGGTCACAAACGCACGCATAGCCACATGGTTAATGGCCCTCCAG  
GGGCGCAATGTGGAAGCACGATACGCCAAAACCACAAGTCACCGCTGGGTGACGG  
CCTGGCAGCCTGCCAGAGTTGCTCCGATGACTCACAAACAGAGAACACAGAAGCAG  
AACGGACCCAAGTACAGCCGTCTACCTGCCACAGGTATTTTGACGAGAATGTGTGCC  
AAGGCATCCCCACGGCCTACGTTGATGGATGTTTCTACAACCAAGAAGGCCAAACTA  
AAAGCAGGTGCCGGGGTTCTCTGGCTAGACAATCGACCTTGCCCACCACAACACTTC  
AAACTGGGCCACAATCATCACAATACGCAGAGATTGCAGCCATTCTCATAACCCTG  
CAAATCGCCTCGACTCATAACATCAGAGAAGTGTCTCATCTGCACAGACTCGAACTAT  
GCCAGACTCAGCTTCATGTGCCATCTTCCAAACTGGAAACAAAATGGTTTCAAGACC  
GCAAACAAAAAACCAGTTAAGCACCAACAACACTGTTCCAGGCTTGTGACAACATCAC  
AAGGGAACACGATATAATGGTCTACTGGAAAAAAGTGAAAGGACACTCTAAACAAC  
CTGGTTTAGACAAGGACCTTAACGACCAACAGATGCACTAGCTACAGCAGGTGCA  
CTACACGGCGAGTTATGGTATCCACCTGCCACCCACCCACCCTTAATGTGGCTGCC  
ATAACCCGCAGCAAACAGACTCAGCCCACTTCAATGACCACCTCACAGCCGCTTAC  
GCTGGCTCCTCAAATCACCACCATGGACATTGCTGACATGCAGGCCTCTGACCCAGC  
TATACACACTATCCCTCACCACCTCTCTGACCCCTCCAACCGCCCTATCACAGCTGC  
ACAAATGGCCAATACGCCAACCTCAAAGCACTACTCAACGTGAAACCTATGCTGT  
GTGTGACGCACAATATTCTTGGGTACTGCCCTGATGACGTCCTGCGCCAAGGCTTG  
TGGTGCCACAGTGCCTAAGGGGGGTCATGCTAATATATGCTCACGACACACCAAGC  
GCGAGACACCACGGCACAAGTACCACGTATGAGACACTAGAACAAGCGGCATACTG  
GCCAGCATGCAGCAAGATTTGGCAGAGTATGTGAAAGAATTCTTTCTTGTACCA  
ATTCCAACCAACAAAAACAAACCACAGAGCCTCACTGCAGCGCAGAGGAGTCACAT  
CTCCTTGGTCAGACCTCAAAGTGACTGGGTTGGACCCCTGCCTAGGTCAACTAGAG  
GCTACAAGTATTTCTCAGTCGTATTCCAGTTCACAAAGTGGGTAGAATGCCTCC  
CGGCACCGAATGCACTGCACAGACTACAGCATACTCCTGATGAATCACATATTCT  
CCAGGTTTCGGGCTGCCACTGAGAGTCAACTCGGACAGGGGCACCCACTTCACAGCT  
GAGATCATGCAGCAAACCTGGAACTTCTGGGAATACAAGCACGCCTTCACATAAG  
TCAACACCCTATCGCGTCCAGACAAGTGGAACGTATGAACCGGACCGTAGTCAGCA  
TGCTACGAAAGTTTGTGTCCCCAACCAAAAGGACTGGGATGTGAAACTTCCACTGG  
TGCTCATGGCCATCAGAGCAACTCAAATGAAGCAACAGGTGTGTCTCCCTTCGAAC  
TGATGACAGGCCGGCAAATGACATTGCCATTACACCTGCTATAACCAGCCAGGAGAC  
ACCAACCTTGTACCGCCTACACCACTACCAGTACCTTGATGAACTGCACCGGCAT  
TTGAGAACCACATTTGCTTTTGCCCAACAACGACTCCAAAAGAGTGCAGAAGGCCA  
GAAAGCATATTACGACCGGAAGGCATCACACCACGAACTGGACGTGGGTGACAAGG  
TCTGGTATTACCGCTACACACAGCTGCCTCAGACATCCTCTCATCAGCTGTCAAAGA  
AGTTTCTGCCCACTGGACTGGACCGCATGAGATCATGGACAAACTCTCTCTGTGCG  
CATAACCGGATCAAGCTAAGCCGGGGACAGAAAGAACCAGCTTTCAAATGGGTCCAT  
CGTAACCAGATCAAGAGACATGTGGCTACTGGCAGGGGAAGACAAGGGGGGGCTA  
GTAAGTACTGACTAGACCTTACAAAAAATAAAAAAAAAAAAAAAAAAAAAAAAAAACT  
GAAGACCGCTCTGAACAGGCGAGAACTTCTTTGCTGATCCACTGCCTTTCTCCTTC  
CTCTCTGAAACAGGATGCTGCTGTGGCTCTCCATGCTATGCCTCCAGCTAACCAGAG  
GACAACCACAACCTGACATCACATCCCCGGGCCAGCATCTGGTATTGCACTAAGG  
GACCAACCTGGACTTCTCGTCACCAACTGCAGAACATATACCCAAAAGGTGTATGTC

CGTCTGGACCCCCGAAATGTCTACAGGAAACATTACCCTGAGGCAACTGCACGCTA  
CAGTTGGGCAGGTGCCCGGTGGACAGAGGATGCCCTAGGTACAGCAGAAGCTGATG  
TCAAACACATGCTCACTCAACTAAAAAGATGACTGTCACACAAGCAGAGCTAAAT  
GGACACAACAAACGTAACAAACGTTTCCTGGGGGCCTTGCTCGGAGCTGCTGCTGC  
CGTAGGAACCTTGTTCAACCTAGGAGTGACCAGCGTCAACTCCGTGCGCCTGTCTAC  
CCTGAAGCAACATGTAGAGGAAATCCAAACCGAGGTTCCCAACTAAGAGAACAAC  
TTGCACTACAGGGACAAACCCTACAGACTATCGGCAAATCATTGAAGGGCACCTTG  
GTGGTTCTGAACACTCACAGTGTCTTTTAAACAAAACCTGTGAACTCTGTGAAACAG  
CTATTCTCCATTATACAGAATGACGTTGCCCAAGCTCAGCTGGTCACCACACTGATG  
TCCGACATGCTACGTGAGGTGAGCTCTTCCATTGACAGCATAGCTATGGGTAGAATT  
CCCCGTATCTCGTGCCCTGAGCCTTGTAACAAGCAGTGTTATCCTCCGCTACCACTC  
ATCCACCGGACTCGCTCCAAGCCCACCTGGCCTACTCCCTGGGAGGTTCCATCCTGT  
TACATGTTGACCCTGAACAGAGTGAGATGGCATTCTCCTAAACCTCCCCATCATTG  
ACTCTGACAACATTTACAGACTCAAGGACATTGTCAATGTCGGATTTTGGCAAGGAA  
ACACACACATCAGGATACTCACGCCAGATGTTGTAGCCTACCACGACAGTAACCCA  
CAGTTATACCTGGCCCCAAACCTGCGCATGTGTACCCTGACCAAAGACATCCATTAT  
CTCTGCCCCAGTAAACCCTTCCTCCGTGACAATACGGAAGGAATCTGTGGCTTACAG  
GCCATGCCGAAAGAGACACTCTGCCCTGCTGAGGGCCAAAACCTCGAGCACACGTCAC  
AGAAACGCATGCAGAGATTGTGGGGAATCAGTGGCTGGTTAACACACCCATCAGTA  
CCGCCACACTGACCTATGATCAACATGACACTGCCACCCGGATCAACGTGCCCAACC  
AAAGTATGTGGATTCAAGTGCCGAAAGGTGCCATCCTCCACATCGGGGACCTGGCG  
TTGTACCACCTCCGAGCGATGAGTACCAGTCCGAGGTGGAACCTCCATCTTTCTTC  
AAGGATCACAGTCTCACCCCTGGAGCCCGAATTGGAACAGAGCATTGAGGAAGGGGG  
GTCTCAGATAATTGATATCACCCCAATCGACACAGCCCTCCAAGCATTGTCTAGGCA  
ACCTGTCCAGACCAACTTTCCTGTTGCCCGATCCTGGACTGCGGCCGACACAGCTCT  
TTGCCCTCGCCACAGCGATCGGTTGCACCCTAACTCTCGGCCTTGCCCTTCGTCCTGTTT  
AACAGAGTAAATTTGGTGCAAAGGTCCATGAACCGGTGCACGGCTGCATTTCCCCG  
GACCTTCAAGAAAAACCGCCGTAGGAGAGTACCCAGGGCGGAGGCAGTGCTGAACT  
TGACCAAGGGGAACACCCGGGTGGAAGACCCAAAGGCTTGCTGGTCCACCTGCCAT  
CTGACTTACAGGATCCATCTGTCATCCCACCTTCATGATCCAATGTGTCTGATAAGGT  
TTCTAGTTGAACACTTTTCAGCCACAAGGGGGGATTTGTAGCGTCTGCGTAGGATCA  
CAGATGGTTGATCTTCAAAGAACCTTTTAAACCTTTGACATTTACATAACCAATTACAA  
CCCTGGACCCTCACTCTGATCGTCCCGTCTTCCCCACTGTCACAAATGTAGCGTCTG  
CGTAGGATCATAGATGGTTGATCTTCAAAGAACCTTTTAAACCTTTGACATTTACATA  
CAAATTACAACCTGGACCCTCAGCCTGATTGTCCCGTCTGCCCCACTGTCACCAAG  
ACGATGCGAAGCAGACGGGGTCTGCAAACCTGCTCATCGGGGCTCCAAGCTTCAAAG  
CATTCAAAGACCTCCTGCCTGGCCCCACCGTCGCAATACACAATCACGCACACACT  
TAAACATATTGTCTGTATCTTGTGCTAGGAATATGTGATTATAAGTGGATCCCGTA  
TATGCACGCGTTGTGTGTACGTTCCCTTGATGAATTATACTAGTTACAACCTTTCTAT  
TGTACATTAGGTAAACTTTAATTACCTATAATTAAGTGTATAAGTGTATCTCTACTTT  
CCTACCTCCTAAAGGTCCCTTTTCTTGGTGTGAGAAGGAACTTCTCTTTACTACTGGAA  
CAGTGATGCATACCATGTGATCACAAAATACATCATACAATTTCTATAAGGTAGAAA  
TTGTAACCTGCAACAACTACAGTCTCTCTCTGGACCAGCCATAAACATTCCGGTCAG  
TCGTAAACCCAGACAAAGGGAACCTTCTCCCGCCAAAATGTCACACTTGTGATTGGCT  
ATTCAGGCCACATGATGGGCGTGCCAGAAAACATTCAAAAGGAGCGTCACACAGG  
CACGAATGCTCAGAACCTTCTCTTCTTCCGAGACACCTCTTCAACACTTTGACT

CTTTGGCAAATTTACCTTCAAGGAGAACCTCCAGCGCCAGACCTAAGGATCGAGG  
ATCGTGACCCTACCGCATCAGGACTCTTTGCATGAAATAAGGACCAATGCAAGTAAC  
TATTTAGATGCACGTCTAAACCCCTTTTTAAGGTGAACTTAAGAATTCTCTGACGATT  
CTCATTAGGCTGTGGTTAATTGATGTGTAATACTGCCATTCTCTTTTCATCACTTTCT  
TTACCCTGTATGTATATGTTTGTCTAATTGTTGTATGTTAGCTATAGCCGTGTTTATTA  
AAATCTTTAAATTCACAATCGTTTGTCTGTGTGCTGCTCACAGCTGAGTCACTGAA  
CGTTGACCTTTTAAGCTACATGCTAAGTACTGCTAGTACGCAGAGGGGAAAGCTAC  
CTTTCCTGGCAAGAGGGGGGATAATCGTTCCCAGAATTGATAAATAATTATATTAT  
CTGCTCCGTGGACGGACAGATCAAGTAATTGTAACATTAATTCTGCTACAGTTTATC  
CCCAAATCTAGTCTAAATGTTTATTATTAATTATAACCAGTTATAATTAATTCTAGAT  
ATTTCTCTTGAGCTAATTCGTTACAGCACCCCTGA

> Loki-Dcl consensus sequence 5'LTR

TGTAGCGTCTGCGTAGGATCACAGATGGTTGATCTTCAAAGAACCTTTTAACCTGTG  
ACATTTACATAACCAATTACAACCCTGGACCCTCACTCTGATCGTCCCGTCTTCCCCCA  
CTGTCACAAATGTAGCGTCTGCGTAGGATCATAGATGGTTGATCTTCAAAGAACCTT  
TTAACCTTTGACATTTACATACAAATTACAACCTGGACCCTCAGCCTGATTGTCCCGT  
CTGCCCCACTGTCACCAAGACGATGCGAAACAGACGGGGTCTGCAAACCTGCTCAT  
CGGGGCTCCAAGCTTCAAAGCATTCCAAGACCTCCTGCCTGGCCCCACCGTTCGCAA  
TACACAATCACGCACACACTTAAAACATATTGTCTGTATCTTGTGCTAGGAATATGT  
GATTATAAGTGGATCCCGTATATGCACGCGTTGTGTGTACGTTCCCTTGTATGAATTA  
TACTAGTTACAACCTTTCTATTGTACATTAGGTAACTTTAATTACCTATAATTAAGTG  
TATAAGTGTATCTCTACTTTCCTACCTCCTAAAGGTCCCTTTCTTGGTGTCAGAAGGA  
ACTTCTCTTTACTACTGGAACAGTGATGCATACCATGTGATCACAAAATACATCATA  
CAATTTCTATAAGGTAGAAATTGTAACCTGCAACAACTACAGTCTCTCTCTGGACCA  
GCCATAAACATTCCGGTCAGTCGTAAACCCAGACAAAGGGAACCTTCTCCCGCCAAA  
ATGTCACACTTGTGATTGGCTATTCAGGCCACATGATGGGCGTGCCAGAAAACATTC  
AAAAAGGAGCGTCACACAGGCACGAATGCTCAGAACTTCTCTTCTTCCCTTCCGAGAC  
ACCTTTTCTTTCAACACTTTGTTACTCTTTGGCAAATTTACCTTCAAAGGAGAACCTC  
CAGCGCCAGACCTAAGGATCGAGGATCGTGACCCTACCGCATCAGGACTCTTTTGCA  
TGAAATAAGGACCAATGCAAGTAACTATTTAGATGCACGTTTAAACCCCTTTTTAAG  
GTGAACCTAAGAATTCTCTGACGATTCTCATTAGGCTGTGGTTAATTGATGTGTAAT  
ACTGCCATTCTCTTTTCATCACTTTCCTTTACCCTGTATGTATATGTTTGTCTAATTGT  
TGTATGTTAGCTATAGCCGTGTTTATTAATTCCTTAAATTCACAATCGTTTGTCTCT  
GTGTGCTGCTCACAGCTGAGTCACTGAACGTTGACCTTTTAAGCTACATGCTAAGTT  
ACTGCTAGCACGCAGAGTCGGGAAAGCTACCTTTCCTGGCCAAGAGGGGGGATAAT  
CGTTCCCAGAATTGATAAATAATTATATTATCTGCTCCGTGGACGGACAGATCAAGT  
AATTGTAACATTAATTCTGCTACAGTTTATCCCAAATCTAATCTAAATGTTTATTAT  
TAATTATAACCAGTTATAATTAATTCTAGATATTTCTCTTGAGCTAATTCGTTACA

> Loki-Dcl consensus sequence 3'LTR

TGTAGCGTCTGCGTAGGATCACAGATGGTTGATCTTCAAAGAACCTTTTAACCTTTG  
ACATTTACATAACCAATTACAACCCTGGACCCTCACTCTGATCGTCCCGTCTTCCCCCA  
CTGTCACAAATGTAGCGTCTGCGTAGGATCATAGATGGTTGATCTTCAAAGAACCTT  
TTAACCTTTGACATTTACATACAAATTACAACCTGGACCCTCAGCCTGATTGTCCCGT  
CTGCCCCACTGTCACCAAGACGATGCGAAGCAGACGGGGTCTGCAAACCTGCTCAT  
CGGGGCTCCAAGCTTCAAAGCATTCCAAGACCTCCTGCCTGGCCCCACCGTTCGCAA  
TACACAATCACGCACACACTTAAAACATATTGTCTGTATCTTGTGCTAGGAATATGT

GATTATAAGTGGATCCCGTATATGCACGCGTTGTGTGTACGTTCCCTTGTATGAATTA  
TACTAGTTACAACCTTTCTATTGTACATTAGGTAACTTTAATTACCTATAATTAAGTG  
TATAAGTGTATCTCTACTTTCTACCTCCTAAAGGTCCCTTTCTTGGTGTGAGAAGGA  
ACTTCTCTTTACTACTGGAACAGTGATGCATACCATGTGATCACAAAATACATCATA  
CAATTTCTATAAGGTAGAAATTGTAACCTGCAACAACTACAGTCTCTCTCTGGACCA  
GCCATAAACATTCCGGTCAGTCGTAAACCCAGACAAAGGGAACCTTCTCCCGCCAAA  
ATGTCACACTTGTGATTGGCTATTCAGGCCACATGATGGGCGTGCCAGAAAACATTC  
AAAAAGGAGCGTCACACAGGCACGAATGCTCAGAACTTCTCTTCTTCCCTCCGAGAC  
ACCTCTTTCAACACTTTGACTCTTTGGCAAAATTTACCTTCAAGGAGAACCTCCAGC  
GCCAGACCTAAGGATCGAGGATCGTGACCCTACCGCATCAGGACTCTTTGCATGAA  
ATAAGGACCAATGCAAGTAACTATTTAGATGCACGTCTAAACCCCTTTTTAAGGTGA  
ACTTAAGAATTCTCTGACGATTCTCATTAGGCTGTGGTTAATTGATGTGTAATACTGC  
CATTCTCTTTTCATCACTTTCCCTTTACCCTGTATGTATATGTTTGTCTAATTGTTGTAT  
GTTAGCTATAGCCGTGTTTATTAATAATCTTTAAATTCACAATCGTTTGTCTGTGTG  
CTGCTCACAGCTGAGTCACTGAACGTTGACCTTTTAAGCTACATGCTAAGTTACTGC  
TAGTACGCAGAGGGGAAAGCTACCTTTCCCTGGCAAGAGGGGGGGGATAATCGTTCCC  
AGAATTGATAAATAATTATATTATCTGCTCCGTGGACGGACAGATCAAGTAATTGTA  
ACATTAATTCTGCTACAGTTTATCCCCAAATCTAGTCTAAATGTTTATTATTAATTAT  
AACCAGTTATAATTAATTCTAGATATTTCCCTCTTGAGCTAATTCGTTACA

> Loki-Dcl consensus sequence *smc-gag* gene

CTGGTAGGACTTGCATTGGTTTTGTTTTGTGCTGTCCCTCTCTCTCGCTCCCTTTCTCT  
CCCTCTCTCGCCTGACCAGCAAGCCAACATGTCTCGATCATCCAGCCCTGAGGCCCA  
CTGGGATCGTCTAGAAGTCTGGCTGAACGCCCTGACTAGCAATCTTCTTCATGAACC  
CACCGGGGACCTGCAGAACCTGAGCCAAGAGCAGATTGACGACAACCTGAGCATCT  
TGATGGCCCGCGATCCGACGCAGGACTACAGCCACAAGGAGCTGGCCAAGATCACC  
GCGTCACTGGCTCACAACCTCCTCGGCCAGGCAAAGCTGAGTGAAGCAACAATCCA  
CCACCAGGAACGGCAGACTGCAGCACTAAAGCTTCAGGATGAGAGAGCACAGAGG  
AATCTGACGCTCGTTCGAAGACAACCTGGAGCAACTGGAGACTCAGGACAGGACAGC  
ACACAAACAGCACCCAGAGCTACAGGAGGAATTGGAGAGACTCCAGAACGCCTTGA  
CTGATCTCCGCGCGGACACAGCACACCGGGAAGAGCAGGAAAAGGACGCCAGAGA  
AGAGCTGAGGGAAGAACTCAACGAGGCTAAGACCCTCCTGATGAGAGCAGAGACTG  
AACTTAAAGAAAGAGAAGCCTGGGCAAGGGCCTGTGAGGGCCACCTGCAAACCTGCC  
CGGGCCGAGGTCAGTACTCTGTCCCAACAAAGAGACTATCTGAAAGATGAACTTGA  
CACAGTTCGCAGAGAGCTCAAGCACTCATATAGACTGCACGATGACCCTAGAAGAG  
AGATGCACCCCGCAGAGTTTCCCCTAACCAGCAGCAAAGGGAGGAGAGCCAGTG  
CTCAGGACATCACCTGCCAGCATCCCAAAACCCCGCCAGCAGCAAGGGGGTGGGA  
ACCCTCTCAAAGACTACATTCCAGTCATGGCGTGTCAACCAAAGAACTGGATAAGCT  
GGCGAGGAACATTCCTATTTTCACTCCCAACCCTGCAGGAGGCCATGATGTCCACTC  
ATACCTCGATGATGTGGACTTCCACTTGCAAACCTGTTGCTAACGTTACCACACGCGA  
CAGACTTTATCTGCTCAGAATCACTGCTAGCCGTGAGGTGCGCAGTTTCCCTGGACCG  
ACAGCCAGAGAGCGTCAAAATGGATCATCAGCAACTGCAGCAAGCGCTAATCAGGG  
AGTTCTCTGACCCAGAGTCAGAGCATGGACTGATCACTGCCATGGACCTTAAACAGG  
GCAGACAGGAAACCACGCAAGCCTACTACAACAGACTCCGACAGGCCTACTTCGGA  
GCACGCAACGAGCCAGGAATGGAGGACGATTTCAATTTAGATCCCTGTTCCCTCCGG  
AACCTGCACCCACAGTAAGTCACTATCTGGGGGTTCTGGCATGCCACGGACGATG  
TCCACCCAACAGCTGAGAGACTTGGCCCAACAGGCCTTCGCCAAACAAAGAGCTGT

TTCGGAAAAGACAGCGAAAACCCACACCATCTATCCTGTCTCCACTCAGAGTGCAG  
AACTCACTCTAGAGGGCGCCGAGCAAAGCCACCATGACAACAGATGGTCACGAACC  
TTTCCAGCCAACAGGGGGCAGCGTGGACATGACGGGGCCCGACACAAACACCAAAC  
TGGTCATTCCGGAAGATCCTGGGACAGGTCACAACCACCTCCAACCCAAGGGATG  
AAGCCACATGGGAAGGAAAGAGACGCCAGAAGGAGCCAATTTTCAGCAACACA  
AGCGTCAAGATCAGATTGGCAGCAGCCGAACCCTTCTCAACACTCTCTGGATCAGTC  
CAGATTTAAATCACCAGCAGGACCAAACCTGGGAAGCCACATCTGAAGCAGCAGAGA  
TTATGAGAGTTTTGAAGGAACTCCTCCAGGAAAGGCACCACAGGGGGGACAAAAAG  
GATGAGTCAGATCAGGCATGA

> Loki-Dcl consensus sequence Smc-Gag polyprotein

LVGLALVLFCAVPLSRSLPLSPDQQANMSRSSSPEAHWDRLEVWLNALTSNLLHEPT  
GDLQNSLSEQIDDNLSILMARDPTQDYSHKELAKITASLAHNLLGQAKLSEATIHQER  
QTAALKLQDERAQRNLTIVRRQLEQLETQDRTAHKQHPELQEELERLQNALTDLRADT  
AHREEQEKDAREELREELNEAKTLLMRAETELKEREAWARACEGHLQTARAEVSTLSQ  
QRDYLKDELDTVRRELKHSYRLHDDPRREMHPAEFPLTSSKREESPVLRTSPASIPNPP  
AARGWEPSQRLHSSHGVSTKELDKLARNIPIFTPNPAGGHDVHSYLLDDVDFHLQTVANV  
TTRDRLYLLRITASREVRSFLDRQPESVKMDHQQLQALIREFSDPESEHGLITAMDLKQ  
GRQETTQAYYNRLRQAYFGARNEPGMEDDFNFRSLFLRNHPTVSHYLGVLACPRTMS  
TQQLRDLAHKAFKQRAVSEKTAKTHTIYPVSTQSAELTLEGAEQSHHDNRWSRTFPA  
NRGQRGHDGARHKHQTGHSGRSWDRSQPPSNPRDEATWEGKRRPRRSQFSATQASRS  
DWQQPNSQHSLDQSRFKSPAGPNWEATSEAAEIMRVLKELLQERHHRGDKKDESDQA

\*

> Loki-Dcl consensus sequence *pol* gene

CTGCTGACCACAGAACGAGAGGTCCCACCACCAAGTGATATCACGCAACCACAGCA  
GATGACTACAGAACCACAGAGCCAGCCAATTTCCAGCATCACACCTCAAGCCAGG  
ACCTTGATGTACCTGAGAGTGCTGTCTTGGTGGTCTGTCTGCCGGAAGAGTCACGGG  
AGACTGGTCCTGACTGCTTACCGATTACCACACAAGCCCCAATACCAAGACTGTTGG  
GGAACCTAATTGAAAGGGGGGTAGCCAAGAACTGTACCTGACCACCACTTTGGAG  
AATGAGGTAAGGCTAGAGGCCCTGGTGGACACGGGAGCAGACCTGACTCTGATGTC  
AGCCCAGCTTTTCGACAGACTTCAGATTGCTGCCAAGAGACAGAATCGAACTCTCGA  
ATATAAGAAGTGTGTGCTGAACGTACAATCATAACAGCCAAAATGATGTACAACCTAG  
ACAACCTAGCTCCCATTACCTAACCATCGGCCCTATGACCTTAGTACACCCTGTGT  
ACATCTCTCCATTTGACACATACCCTCTCCTTATTGGAAAAGACCTGCTAGACCGCTT  
TGAGCCCCTATTGGACTTCAAACATCTAAAAATTTGGGCTCAAGTGCGAGAACCCTCT  
GCCTCCTCAGTCACCAAGATCACGCCAGACAGACTGCCAGGTCACAAAGGCCACAG  
AAGGTCTCGCCAACAACCTGCGGGAACACACCGACCCAAGAGCAAGGTTCAAGGTCA  
TCACTATGCACTTTCCAGCTAGCTAAAGACTCTGACTCCCACGGCCCTCAGGTTATG  
GGGGCCTTACAGCTGAATGATGTCACAACAACAGACTCTGTGCTTGAAGTGTGGGCA  
GACAACTCAGCAATCAGCTCCTCACTGTTCAATGCTCTCATAACAGCAAACAGGGAAC  
GTCCCTACTGCCAGCAAACGTACCCGCTTCCCTCTGAATCCCTGCCTGTCAACTATG  
GTAACCGCCAAGTGCATCTGTGCTCTGAACCTGAAGTGAAGTGAAGTGAAGTGAAGT  
CATTACTTCCTGGTCTCCTCCAGACATATCACATGACGTGTACATTGGAGCGGACATT  
TTGATTCGCCTCAGGGCTCATGTGGACATGATCAATGACGTGGTATGGGCTCCAACA  
ACCTCACAGGCCCCCACTGTTCCCGTCAAACCTTAAAAACCTCCAGTCAGGTCAAACC  
ATCCCTGAGGCCTGCACAATGGTCAGTGAAGAAGAACTGTAATACCAGCCTACAC  
CAAAGGGGTCCTGTTGACTCAACCTGCGATCTGGTCAGACCTGCAGCCACACATT

GGGCTTCTTCCAACCCTTGCCTGAGTGTGGGGA ACTGGGCCTCACTCTAGAAGCTAC  
ACCCCTTGTTGAAATAACATCCC GGGCAGTGTACATACTGTTCAATAACTGCACCGC  
AACGGATGCCAAAGTGCCTAAGGCCACCGCCTGGGTTGGCTAGTGAGTTACGACTT  
TCATGACTTCGAACTGATCCTCCCAGTAATTGGACCCATCCCAGAGTCAATGATTCC  
GGAAGAAAGCTCGGGCAACTCAGTGTCAACAGCACCATTCAAGACCATCACCATAG  
CTTCAGTCATGCCAGTAGTCAAAGAGCAGGTGTGTAGAACGGAGCTGACAGAAGAC  
CAACATCTTGCAGTGTATACAGTCTCTAACCACACTACCAACAAAATGACAGAAGA  
GCCATACCCAGGTTTTGAGACCCAAGTCCAGCAAATTCTGAAAGACGCCGATGCCA  
TACAGGAGGAGGCAGACCGCCAAAAGCTCCGCCAAGTCCTGTACAAATACAAAGAA  
TCATTTGCCAAGGACCCTTTAGACTGTGGCCTCACTAATCTTCACGTGATGCGCATA  
CCAACACACCCGAAAGCTCCTCCC ACTTTTCGTCAAGCAATACAAGATACCCTTAGAA  
TCGTACGAACCCGTACAAGAGATCATCGATTCTATGCTCGAAAAAGGCGTTATTCGG  
CCATGCAACAGCACCTATTCTGCCCAATTTGGCCTGTCCTCAAACCAAATGGCAAG  
TGGCGACCAACCATCGACTACAGAAA ACTGAACCAGCAGGTACCATTATCACGGTG  
GCCATGACCCAGCTCGAACAGGAAATCCCAAGAATCAGAGGGGCCACCATCTTCT  
CCACGCTTGATGTGGCCTCAGGATTTTGGACTATACCGGTACATCCAGATGACCAAC  
ATAAGCTGGCTTTCACCTTCAGTAACCGGCAATACACCTTCACAAGGTGCCATTTCG  
GCTATGCCAACTCACCTGCCGAATTTAATATTTTTCTTAAACAAGGCGTGTCCAGATG  
CAAGAGTGAGAGGGAACCTAATCTATGTTGATGATGTTCTCATGAAAAGCATGACC  
GTGGCCGATCACCTGAAAGAAATTGACCACGTGTTGCACCAACTGACTGCCGCTGGT  
GCCAAGATCGCCCTTCACAAGGGACAATGGGGAAAGTCTAAGGTTAACTATGTAGG  
TCTACTCATCGGACCACAAGGTATCGAGCCTCAATCCAGCCGCATTCAAGCCATCCA  
GACCATCAAGCCACCTGTCAATGTCTCAGAACTCAGAAGTTTTCTCGGCGTGTGCAA  
CTATTCACGGCAATTTATCGAAA ACTACTCAGACATTGCACGCCCTCTCACTACACT  
GTTGAAGAAGGACTGCCATTTGCCTGGACAGAGGATCAGCAAGAAGCTATGGATG  
AACTGAAACGACACCTGTGCACTGCACCATGTCTGGCCTATCCTGATCCACAAAACG  
AGTTCTATTTGGACGCTGGATTCTCCAGCCACTGTCTCAGCGCCGGGTTATACCAAC  
GACTGGACCAGGACAAAAGGGTGGTAGCATATGCCAGCAAGACTCTTCTTCCCCCA  
GAGTGTAATACTCAGACTGTGAAA AAGCCCTGCTCTGCACTGTGTGGGCCCTACAA  
AGATTCTCTAACTACATTGGAGCACAGAAAGTTATAATAGAAACCTGCCACCAGCC  
GGTCACATTTCTCAACAGCCAGCGCATCAGAGACGGAGTGGTCACAAACGCACGCA  
TAGCCACATGGTTAATGGCCCTCCAGGGGCGCAATGTGGAAGCACGATACGCCCAA  
AACCACAAGTCACCGCTGGGTGACGGCCTGGCAGCCTGCCAGAGTTGCTCCGATGA  
CTCACAAACAGAGAACACAGAAGCAGAACGGACCCAAGTACAGCCGTCTACCTGCC  
ACAGGTATTTTGACGAGAATGTGTGCCAAGGCATCCCCACGGCCTACGTTGATGGAT  
GTTCTTACAACCAAGAAGGCAA ACTAAAAGCAGGTGCCGGGGTTCTCTGGCTAGAC  
AATCGACCTTGCCACCACAACACTTCAA ACTGGGCCACAATCATCACAATACGCA  
GAGATTGCAGCCATTCTCATAACCCTGCAAATCGCCTCGACTCATAACATCAGAGAA  
CTGCTCATCTGCACAGACTCGAACTATGCCAGACTCAGCTTCATGTGCCATCTTCCA  
AACTGGAAACAAAATGGTTTCAAGACCGCAAACAAAAAACCAGTTAAGCACCAACA  
ACTGTTCCAGGCTTGTGACAACATCACAAGGGAACACGATATAATGGTCTACTGGA  
AAAAAGTGAAAGGACACTCTAAACAACCTGGTTTAGACAAGGACCTTAACGACCAA  
ACAGATGCACTAGCTACAGCAGGTGCACTACACGGCGAGTTATGGTATCCACCTGC  
CCACCCACCCACCCTTAATGTGGCTGCCATAACCCGCAGCAAACAGACTCAGCCCAC  
TTCAATGACCACCTCACAGCCGCTTACGCTGGCTCCTCAAATCACCACCATGGACAT  
TGCTGACATGCAGGCCTCTGACCCAGCTATACACACTATCCCTCACCACCTCTCTGA

CCCCTCCAACCGCCCTATCACAGCTGCACAAATGGCCAATACGCCAACCCCTCAAAGC  
ACTACTCAACGTGAAACCTATGCTGTGTGTGACGCACAATATTCTTGGGTACTGCCC  
TGATGACGTCACTGCGCCAAGGCTTGTGGTGCCACAGTGCCTAAGGGGGGTCATGCT  
AATATATGCTCACGACACACCAAGCGCGAGACACCACGGCACAAGTACCACGTATG  
AGACACTAGAACAAGCGGCATACTGGCCCAGCATGCAGCAAGATTTGGCAGAGTAT  
GTGAAAGAATTCTTTCCTTGTTACCAATTCCAACCAACAAAACAAACCACAGAGCC  
TCACTGCAGCGCAGAGGAGTCACATCTCCTTGGTCAGACCTCCAAAGTGACTGGGTT  
GGACCCCTGCCTAGGTCAACTAGAGGCTACAAGTATTTCCCTCACAGTCGTATTCCAG  
TTCACAAAGTGGGTAGAATGCCTCCCGGCACCGAATGACACTGCACAGACTACAGC  
ATACCTCCTGATGAATCACATATTCTCCAGGTTCCGGGCTGCCACTGAGAGTCAACTC  
GGACAGGGGCACCCACTTCACAGCTGAGATCATGCAGCAAACCTGGAAACTTCTGG  
GAATACAAGCACGCCTTCACATAAGTCAACACCCTATCGCGTCCAGACAAGTGGA  
CGTATGAACCGGACCGTAGTCAGCATGCTACGAAAGTTTGTGTCCCCCAACCAAAA  
GGACTGGGATGTGAAACTTCCACTGGTGCTCATGGCCATCAGAGCAACTCCAATG  
AAGCAACAGGTGTGTCTCCCTTCGAACTGATGACAGGCCGGCAAATGACATTGCCAT  
TACACCTGCTATACCAGCCAGGAGACACCAACCTTGTACCCGCCTACACCACTCACC  
AGTACCTTGATGAACTGCACCGGCATTTGAGAACCACATTTGCTTTTGCCCAACAAC  
GACTCCAAAAGAGTGCAGAAGGCCAGAAAGCATATTACGACCGGAAGGCATCACA  
CCACGAACTGGACGTGGGTGACAAGGTCTGGTATTACCGCTACACACAGCTGCCTC  
AGACATCCTCTCATCAGCTGTCAAAGAAGTTTCTGCCACACTGGACTGGACCGCATG  
AGATCATGGACAAACTCTCTCCTGTCGCATACCGGATCAAGCTAAGCCGGGGACAG  
AAAGAACCAGCTTTCAAATGGGTCCATCGTAACCAGATCAAGAGACATGTGGCTAC  
TGGCAGGGGAAGACAAGGGGGGGCTAGTACTGACTAG

> Loki-Del consensus sequence Pol protein

LLTTEREVPSPDITQPQQMTTEPPEPANFQHHTSSQDLDPESAFLVCLPEESRETGPD  
CLPITTQAPIPRLGNLIERGVAKKLYLTTTLENEVRLEALVDTGADLTLMSAQLFDRLQI  
AAKRQNRLEYKNCVNLVQSYSQNDVQLEQLAPIHLTIGPMTLVHPVYISPFDTYPLIG  
KDLLDRFEPLLDKHLKIWAQVREPLPPQSPRSRQTDCQVTKATEGLANNCGNTPTQEQ  
GSRSSLCTFQLAKSDSHGPQVMGALQLNDVTTTDSVLALWADNSAISSSLFNALIQQT  
GNVPTASKRTRFPLNPCLSTMVTA KCICALNLKWNDRCLTHYFLVLPDISHDVYIGADIL  
IRLRAHVD MINDV V WAPTTSQAPTVPVKLKNLQSGQTIPEACTMVSEEETVIPAYTKGV  
TVRLNLRSGQTCSHTLGFFQPLPECGELGLTLEATPLVEITSRAVYILFNNCTATDAKVPK  
AHLRGWLVSDFHDFELILPVIGPIPESMIPESSGNSVSTAPFKTITIASVMPVVKEQVCR  
TELTEDQHLAVYTVSNHTTNKMTEEPYPGFETQVQQILKDADAIQEEADRQKLRQVLY  
KYKESFAKDPLDCGLTNLHVMRIPTHKAPPTFVKQYKIPLSYEPVQEIIDSMLEKGVIR  
PCNSTYSAPIWPVLKPNGKWRPTIDYRKL NQQVPLSRWPMTQLEQEIPRIRGATIFSTLD  
VASGFWTIPVHPDDQHKLAF TFSNRQYTFTRCPFGYANSPA EFNIFLNKACPDARVRGN  
LIYVDDVLMKSMTVADHLKEIDHVLHQLTAAGAKIALHKGQWGKSKVNYVGLLIGPQ  
GIEPQSSRIQAIQTIKPPVNVSELRSFLGVCNYSRQFIENYSDIARPLTLLKKDCPFAWTE  
DQQEAMDELKRHLCTAPCLAYPDPQNEFYLDAGFSSHCLSAGLYQRLDQDKRVVAYA  
SKTLLPPECKYSDCEKALLCTVWALQRF SNYIGA QKVIIETCHQPVTFLNSQRIRDGVVT  
NARIATWLMALQGRNVEARYAQN HKSPLGDGLAACQSCSDDSQTENTEAERTQVQPST  
CHRYFDENV CQGIPTAYVDGCSYNQEGK LKAGAGVLWLDNRPCPPQHFKLGPQSSQYA  
EIAAILITLQIASHNIRELLICTDSNYARLSFMCHLPNWKQNGFKTANKKPVKHQQLFQ  
ACDNITREHDIMVYWKVKGHSKQPGLDKDLNDQTDALATAGALHGELWYPPAHPPT  
LNVAAITRSKQTQPTSM TTSQPLTLAPQITTM DIADMQASDPAIHTIPHHLSDPSNRPITA



AQMANTPTLKALLNVKPMMLCVTHNILGYCPDDVTAPRLVVPQCLRGVMLIYAHDTPSA  
RHHGTSTTYETLEQAAYWPSMQQDLAEYVKEFFPCYQFQPTKTNHRASLQRRGVTSPW  
SDLQSDWVGPLPRSTRGYKYFLTVVFQFTKWVECLPAPNDTAQTTAYLLMNHIFSRFGL  
PLRVNSDRGTHFTAEMQQTWKLGIQARLHISQHPASRQVERMNRVTVVSMLRKFVSP  
NQKDWDVKLPLVLMAIRATPNEATGVSPFELMTGRQMTLPLHLLYQPGDTNLVTAYTT  
HQYLDELHRHLRTTFAFAQQLQKSAEGQKAYYDRKASHHELDVGDKVWYYRYTQLP  
QTSSHQLSKKFLPHWTGPHEIMDKLSPVAYRIKLSRGQKEPAFKWVHRNQIKRHVATGR  
GRQGGASTD\*

> Loki-Dcl consensus sequence *env* gene

ATGCTGCTGTGGCTCTCCATGCTATGCCTCCAGCTAACCAGAGGACAACCACAACCT  
GACATCACATCCCCGGGCCAGCATCTGGTATTGCACTAAGGGACCAACCTGGACTT  
CTCGTCACCAACTGCAGAACATATACCCAAAAGGTGTATGTCCGTCTGGACCCCCGA  
AATGTCTACAGGAAACATTACCCTGAGGCAACTGCACGCTACAGTTGGGCAGGTGC  
CCGGTGGACAGAGGATGCCCTAGGTACGCAGAAAGCTGATGTCAAACACATGCTCA  
CTCAACTAAAAAAGATGACTGTCACACAAGCAGAGCTAAATGGACACAACAACGT  
AACAACGTTTCTGGGGGCCTTGCTCGGAGCTGCTGCTGCCGTAGGAACCTTGTTTC  
AACCTAGGAGTGACCAGCGTCAACTCCGTGCGCCTGTCTACCCTGAAGCAACATGTA  
GAGGAAATCCAAACCGAGGTTCCCAACTAAGAGAACAACCTTGCCTACAGGGACA  
AACCTACAGACTATCGGCAAATCATTGAAGGGCACCTTGGTGGTTCTGAACACTCA  
CAGTGTCTTTTTAAACAAAACCTGTGAACTCTGTGAAACAGCTATTCTCCATTATACA  
GAATGACGTTGCCAAGCTCAGCTGGTCACCACACTGATGTCCGACATGCTACGTGA  
GGTGAGCTCTTCCATTGACAGCATAGCTATGGGTAGAATTCCCCCGTATCTCGTGCC  
CCTGAGCCTTGTACAAGCAGTGTTATCCTCCGCTACCACTCATCCACCGGACTCGCT  
CCAAGCCCACCTGGCCTACTCCCTGGGAGGTTCCATCCTGTTACATGTTGACCCTGA  
ACAGAGTGAGATGGCATTCTCCTAAACCTCCCCATCATTGACTCTGACAACATTTA  
CAGACTCAAGGACATTGTCAATGTTCGGATTTTGGCAAGGAAACACACACATCAGGA  
TACTCACGCCAGATGTTGTAGCCTACCACGACAGTAACCCACAGTTATACCTGGCCC  
CAAACCTGCGCATGTGTACCCTGACCAAAGACATCCATTATCTCTGCCCCAGTAAAC  
CCTTCTCCGTGACAATACGGAAGGAATCTGTGGCTTACAGGCCATGCCGAAAGAG  
AACTCTGCCCTGCTGAGGCCAAAACCTCGAGCACACGTCACAGAAACGCATGCAGA  
GATTGTGGGGAATCAGTGGCTGGTTAACACACCCATCAGTACCGCCACACTGACCTA  
TGATCAACATGACACTGCCACCCGGATCAACGTGCCCAACCAAAGTATGTGGATTTC  
AAGTGCCGAAAGGTGCCATCCTCCACATCGGGGACCTGGCGTTGTACCACCTTCCGA  
GCGATGAGTACCAGTCCGAGGTGGAACCTCCATCTTTCTTCAAGGATCACAGTCTCA  
CCCTGGAGCCCGAATTGGAACAGAGCATTGAGGAAGGGGGGTCTCAGATAATTGAT  
ATCACCCCAATCGACACAGCCCTCCAAGCATTGTCTAGGCAACCTGTCCAGACCAAC  
TTTCTGTTGCCCGATCCTGGACTGCGGCCGACACAGCTCTTTGCCTCGCCACAGCG  
ATCGGTTGCACCCTAACTCTCGGCCTTGCCCTTCGTCCTGTTTAAACAGAGTAAATTTGG  
TGCAAAGGTCCATGAACCGGTGCACGGCTGCATTTCCCCGGACCTTCAAGAAAAAC  
CGCCGTAGGAGAGTACCCAGGCGGAGGCAGTGCTGAACTTGACCAAGGGGAACAC  
CCGGGTGGAAGACCCAAAGGCTTGCTGGTCCACCTGCCATCTGACTTACAGGATCCA  
TCTGTCATCCCACCTTCATGATCCAATGTGTCTGATAAGGTTTCTAGTTGAACACTTT  
TCAGCCACAAGGGGGGATTTGTAG

> Loki-Dcl consensus sequence Env protein

MLLWLSMLCLQLTRGQPQPDITSPGPASGIALRDQPGLLVTNCRITYTQKVYVRLDPRNV  
YRKHYPEATARYSWAGARWTEALGHAEADVXKMLTQLKKMTVTQAEINGHNKRN

KRFLGALLGAAAAVGTLFNLGVTSVNSVRLSTLKQHVEEIQTEVPQLREQLALQGQTLQ  
TIGKSLKGTLLVVLNTHSVLLNKTVNSVKQLFSIIQNDVAQAQLVTTLMSDMLREVSSSID  
SIAMGRIPPYLVPLSLVQAVLSSATTHPPDSLQAHLAYSLGGSILLHVDPEQSEMAFLLNL  
PIIDSDNIYRLKDIVNVGFVWQGNTHIRILTPDVVAYHDSNPQLYLAPNLRMCTLTCKDIHY  
LCPSKPFRLDNTEGICGLQAMPKETLCPAEAKTRAHVTEETHAEIVGNQWL VNTPISTATL  
TYDQHDTATRINVPNQSMWIQVPGAILHIGDLALYHLPSEYQSEVELPSFFKDHSLLTL  
EPELEQSIEEGGSQIIDITPIDTALQALSROPVQTNFPVARSWTAADTALCLATAIGCTLTL  
GLAFVLFNRVNLVQRSMNRCTAAFPRTFKKNRRRRVPQAEAVLNLTGKGNTRVEDPKAC  
WSTCHLTYRIHLSSHLHDPMCLIRFLVEHFSATRGLD\*

>Loki-Lch consensus sequence

TCCAGACAGAGAAAGTAGATCAATTGACTAGTGATACAAGTAAAAATACAGATTTG  
AAGTAACTGGATTAAGGAAACATAAATTTTTCCTTGGGAACCTTATTCCAAAAGGT  
GAAAGATACTATGTAAGTGTGATTTGCAAGAAATGTATAGTTGTGAGGCTTTGATA  
GACACAGCTTCAGAAAGTACTTTGATTACTCAAAGTATGTTTGATAAATTGATTGAT  
GTCATTGGTAAAAAGAAGAATTTTAGAATTCTTCCCTTGTGATCTCCATTTAATAGATT  
ATGGAGGCAATTCTCAAAAACCTTGTGGAAAAGTCTGGATAAAAAGTAAAAATAGGG  
AAAATGAGTGTTACACATCCTGTGTATATCACAAATAAATGTGAAGAAGAGTTTTTA  
TTGGGAAATGATTTGCTGAAAAGACTTTCTCCAGTCATGGATTATTTACATGAGATT  
TTGTGGTCTCAAGTTAATAGACCAATACCATATGGAAAATATCTTCAAGATCGTGAA  
AAGAAGGTAGAACTTGTTTTATTGAACAAGAAGATTCCAAGTTAAAATTGAATTTT  
ATTCGTTTCAAGCAATCCTACTTACTAGTGTTAGGAGATCCAATAAATTAGTGACT  
TGGAAGACAGAGATAATTTTGTTCCTATATCAAAGGAAAAAATTGTTAAAACCTGA  
ACTGGAACCTAATGGATTAATTTCTTTTTATCTCCAACAGAAGCAGATGCTTTTGA  
CTGTTTAAACACAGCAACAGAAAACCTGTGAGTAATGTTGATGTAGCAACAGCTCAA  
GTTTGCAAGAAAATGACAAAGGAAAGTCATTAACACATCCTAGAGAGTTGTGTTGC  
ATTGAAAAGGAACAGGGTTTTCTTTACATACCTGTTAAAATAGAAAAGTTACAAGCA  
ATGAAAACCTTTGTTGTGCATGGAATATGAGAATTCACTAATAAGTGAGACTTTCTTT  
AGAAAGTTAAAAGGCAAGAATCTGATTTACTTTTTAAAAGAAATAAAAAGTGGGT  
TACAAATGTACCTTGTGAAGAAAAGATTTGATTAGTCCTGGGATCTGTGCTTTACA  
AATCCAAATAGGAAACAAGAATATGATGCACTACTTTCAAGTAGTTAGGGGGTTAA  
GTTATCCAATTTGTATTGGATCAGATTGTCTTGTACGAATGGGATCCTATGTAGATTT  
AATTAACCATATGTTATGGTCTCGATTGGAAAATGATCCCAAACCTCTTAAAGGTAC  
TATACAGTCTTTGAAATCAGGACAACTGTGCCACAGGCATGTCAGGTAGTGAGTG  
AGTTTACATTTACTATACTGAGTAATGTAATGAATTTTCTCTCCAAATTAATAAAA  
AAGGGGTCAGGAAATATCTGATTCACTGGCTTTCTTTGAACCAAGTAAAGAATTTGT  
TAATATGGGTTTAAAAGTTTATGGAACCTCTTGTTTAGATGTGAGTAAAAGGTTTAC  
ATATTTGTTGGTTCAAATGCAACTCCAAGACTATTGTTTTGGAGAAAGATACTGA  
AATTGGAGTATTAGTTGAAAAATCATTTTATGATTTAGAATTGGCCATCCCTGTTATT  
GGAAAATTACCAGAAAACATAACTGGGGGGGGGGGTGAGTTTGAAGAAAGTGTTAA  
AACTTATCCTAAAGGCTTAATTACAATCCAATCAATCTGGCCATATGATAAGGATCA  
TACTTATCAATGTAAAATAGAACCTGATTGTTTGATCTTAGAACGAAAAGAGTTGTT  
GGAAAATGAGACTGATACAGTTAAAACCTGTAATGCAGTTACTGTTGAAGATTTTTTC  
AGAAAAAATTGAAGGAAAAATTGAGTTAGGTGAAAACCAAATTTTCTCTGAATTTG  
AACAAATGGTAAAACAACAATTGAAGCTGCTGATGCTTTAGAATCTGATTCTGAA  
AGGGAACAATTAAGAAAATGTTCCCTGATTTTAAAGATCTTTTTGCTAAAGATGCA  
TATGATTGTGGAGAAACAGATTTGCATATAACTAAAATACCTACAGATTGCAACAA

AAAACCCACATTTGTACGACAATACAGAATACCATTATCGTCCTATGAATCTGTGCA  
AGAAATTTTACATACTTTGATGGAAAGAGAAATTATTAGAGAATGTAATTCTACATA  
CAATTCTCCTATTTGGCCTGTTTTGAAACCAAATGGAAAGTGGCGACTTACAATAGA  
TTACAGGCAATTAATAAAACAAGTGCCTTTGTCTCATTGGCCTATGACCTATCTGGA  
TCAAATTTGACAAAATTGCTGGTGCAAAATATTTTACTACATTAGATATAGCTAA  
TGGTTTTTGGACTGTAAAAGTAGATCCAAAAGATCAATATAAATTGGCTTTCTCTTT  
GGTAAGAGACAATATACTTGAATAGATGTCCTTTTGGATATTTAAATTCCCCTGCA  
GATTTCAATATTTTCTTACACAAAGCAATGCCAGATGCTGAAGAAAGAGGAAATTTG  
ATATATGTGGATGATATATTGATAAAAAGCAACTCAGCTTCAGATCATTAGATGAG  
ATTAGGTATGTTCTTACTCAGCTGAAAAATGCTGGTGCTAAATTGTCATTAACAAA  
GGACAATGGTGTAGAAAGCGGGTAAATATTTAGGATATGATGTTGGACCAGATGG  
ACTTCGTCCACAACAGAACAGGATTAAGCTATTCAAGCTATCAGAAGTCCTACTAA  
TATAACAGAATTACGTAGTTTTCTTGAATTTGTAATTATTCTCGTCAATTCATTGAG  
AATTATGCAGAAATTTACAACCACTCACAAAATTGTTAAGGAAAAATGAACCATG  
GGTATGGGAATCTACACAAGAAAATGCTGTAAGTGAATTAAGGAAAGGCTTAGTA  
AAGTTCATGCCTTGCCTATCCAGAGAAAGATAAAGAATTTTTCCTAGAAACAGGTT  
ATACTGATTCTAGTATCAGTGCAGTATTGTACCAAAAACATGACACAGATAACAGA  
GTAGTTGCTTATGCAAGTAAACTCTTAGTGAGGTTGAAAAGAAATTTTCAGATTGT  
GAAAAGGCACTTTTTTCTACAGTTTGGGCTGTACAATATTTTAGAAATTACATACAA  
GGAGAAAAATTAATAATTGAAACATGTCATCAGCCCATAGCTTTTCTGGGGAGCCA  
GAAAATTAGAGATGGTAATGTTTCTAGTAGTAGAATAGTGGCCTGGACTTTAGCACT  
TCAGGGATTACCTTTTGAAGTTAAATATGCTAAAAATAAGAAAAACATTTTGGCACA  
AGGAATAGCTGAATTACATGATTGTACTGCTACTGAACAAGAAAAACAAAATTGTG  
GTTGTAATTTAGATTTGCCATTACCTTTGGAATCTAATAGACATCTTGTATATAATGA  
AAATGTTTGGCAAAATCTTCCAAAAGCATATGTAGATGGTTGTTCTTTTACCAGTGA  
AGGACAATTACAAGCAGGAATAGGAATATTTTGGGAAGGAAATTTCCATGTACTC  
CTTTGCAATATAAATTGGGACCCAAGTCTAGTCAATTTTTCAGAAATTGCAGCTGTAT  
TTGTAGCTATAGAACTGCAGTGAAAAATAAATTGTCAGATATAGTGATATGTACTG  
ATTCAGATTATGCTAGACATAGTTTTTGTAAATTTTGGCAACATGGAAAGCTAATG  
GAATGAAGAATTCTAGAGGAAAAACAGTAAAACATGCTGAACTTATATTGGCTGTT  
GATCAATTGGTATTGGAAAATGAAATAACAGTTTACTGGAAAAAGGTAAAAGGCCA  
TGCTAAAGACTCTAGTCAAGATAAGTATGGAAATGATTTGGCTGATAAGCTAGCAA  
AAGAAGGAGCAATTACAGGTGAACTGTGGGAGTTTAAGCCTATTCCACAAGTAAAT  
GTTAATGTGGTTACTAGACAAGAAAGTAAACAAAAGCCAATTAATACTGTGTTACA  
GTTGTGCAGTGAAGTACCTAGTTTTGATTTAGTCAAAATGCAGAAGGAGGATGATAC  
TTTAGGAAAATTTTATCAGTATATTGAAAATCCTGAAGAAAATGAGATTTACCTTA  
TGACCTTCAAACAAATTTTGAATTAAGAACAATGTTTAATAAAAAACAAAATTTCA  
GTTAAGAAATGGATTGTTAATTCGAATAGGTAAATCTGGAATGATTCAAGTGGGTTGT  
CCCTTTGTCTTACAGAGGGATAATGTTACAACATGCTCATGATGAAGAATGTGGAGG  
TCACAGAGCAGATAGAGCTACTTATGAAACACTTAAACAAGTGGCCTACTGGCCAA  
ATATGTACCAAGATGTACAAGATTATACAAAAGGTTGTTTAGTTTGTGTAGGTTTC  
AGTCTTCTCTCCTAAACATAGAGCTCCATTGCAAACAAAAGGAATTACTATGCCTT  
GGTCTGATTTACAGATAGATTGGATAGGACCAGTTACTAGATCTTCCAGAGGAAATA  
AGTATCTACTTACAGTAACTTGTTTATTTACAAAATGGATAGAATGTTTACCAGCAC  
CTAATGACACTGCTGAACTACAGCTATGTTATTGATAAATCATGTGTTTAGTTGTTG  
GGATTTACCAATGAGGATAGAGTCTGATAGAGGTTCTCATTTTACTGAAAAGTGAT

AGAAAATGTTTGGAACTCTTGGAGTTCAAAGGAAATTACATGTGTCACATCACCC  
ACAATCCTCAGGACAAGTGGAGCGTGCAAACAAAACCTATAGTGAATATCTTAAAGA  
AATATATTTCTACTTCTGGTAAAAATTGGGATGTGAAGTTACCATTAGTCTTAATGG  
CAATAAAAAGCTACTCCTAATAAATCTACAGGTGTCACACCTTTTGAAATGATGACAG  
GAAGAGAAATGACTTTACCCTTACATCTTTGTACAGGACTTATGATGTAAATTTAG  
CAAGTGCTACAACACTTTTGACTATGTGACAAATTTAAAGCAACATCTTCAAAGTA  
CTTTTGCTTTTGCTCAAAAGAATTTGGATAAAAGTGCTCAAGGTAGAAAAGCATATT  
ATGATAAAAAGACAACCTGTAAAAGAGTATGAAATTGGAGACAAAGTATTCTACTTT  
AACTACAGTAGAAATAATGCAAAAGTAAAGAAATTTTACCAAGCTGGAATGGTCC  
ACATATTATTACAGATAAAGTCTCATCTGTGGCTTATCAAATTAACCTAAAAAACC  
TACAGGAGATGAAGTTTCAAGTGGGTACATATAAACCAACTTAAACCCTATTATTC  
TCAAAGAGAACACAAACCAATGAAACAGAAAATACAGAATGAATTGCTATCTAAC  
TATTGAGATTTTATTTTGCAGATGGCGTTCCAAACCCTCAATGAGGAGAGAACATTA  
ATCCAACCAGTTAGATTGTTAATACAAGATTTGCTATGAGAAATTGACAGTAGCATA  
AGTGATTTGATTAAGGGACAAATTCCTACTTATCTTGTTCCTCAAGAAATTGTTTATG  
ATGCATTCAAACAAATTTCAAGGAATCCTATTGAACCAATTCAGATACAAGTTGCAT  
ATAATATGGGAAGTGCTATTCCTATTTATCTGAATGCTGAAAATTTGGAAATTGCTTT  
TGTTTTAAATTTGCCTTATATAATTCCAGATAATGTTTATCAACTAAAATCTGTCTTG  
AATGTAGGTAATTGGCATAGAGATGTCTACGTAAGTGAATACTCCAGAATTGGT  
AGCCTATCAAGAATATAACCCAGGACAGTATTTGATTCCAAATTTAGAAATGTGTAA  
AAAGGCAAAAGATATTCATTGGTTATGTCCTGGAAAACCTTTCTTAAAAGATACTAC  
TGAAGTTTTATGTGGTTTGACTTCAGAAAATGTTATGGAAAAGTGTAATTTGGTAT  
GACTAAATTGGATGATTTTTCTGAAACAAAAGTTGCTATTGCAAATGCACAGTGGTT  
AGTTAGTATTCCTCTTAAAGAAATCACAGTATCATATAGTAAACATGATGTACTGAC  
TAAATGATTTTACCAAGTAATATTTCAATTAATTACTGTTCCCTAAAGACACTATCGTA  
TATGTTGGTGATGTTTCTCTGTATTACTTAGAACAGAATATTCATGAAGCAAACATA  
GAAATCCTTGATGTTTTCAAAGGACATGAACTGAACTGGGGAGATGACATCAATTAT  
TTGTTGAACTATAAAAACCTCCACACTATAGAAATGAGTGTTAA

> Loki-Lch consensus sequence *pol* gene

TTGACTAGTGATACAAGTAAAAATACAGATTTGAAGTTAACTGGATTAAGGAAACA  
TAAATTTTTCTTGGGAACCTTATTCCAAAAGGTGAAAGATACTATGTAAAAGTTGA  
TTTGCAAGAAATGTATAGTTGTGAGGCTTTGATAGACACAGCTTCAGAAGTGACTTT  
GATTACTCAAAGTATGTTTGATAAATTGATTGATGTCATTGGTAAAAAGAAGAATTT  
TAGAATTCCTTGTGATCTCCATTTAATAGATTATGGAGGCAATTCTCAAAAACCT  
TGTGGAAAAGTCTGGATAAAAGTAAAAATAGGGAAAATGAGTGTTACACATCCTGT  
GTATATCACAATAAATGTGAAGAAGAGTTTTTATTGGGAAATGATTTGCTGAAAAG  
ACTTTCTCCAGTCATGGATTATTTACATGAGATTTTGTGGTCTCAAGTTAATAGACCA  
ATACCATATGGAAAATATCTTCAAGATCGTGAAAAGAAGGTAGAACTTGTTTTATT  
GAACAAGAAGATTCCAAGTTAAAATTGAATTTTATTCGTTCAAGCAATCCTACCTTA  
CTAGTGTTAGGAGATCCAAATAAATTAGTACTTGGAAAGACAGAGATAATTTTGT  
CCTATATCAAAGGAAAAAATTGTTAAAACCTGAACTGGAACCTAATGGATTAATTTCT  
TTTTATCTCCAACAGAAGCAGATGCTTTTGACTGTTTAAACACAGCAACAGAAAACCT  
GTGAGTAATGTTGATGTAGCAAACAGCTCAAGTTTGAAGAAAATGACAAAGGAAA  
GTCATTAACACATCCTAGAGAGTTGTGTTGCATTGAAAAGGAACAGGGTTTTCTTTA  
CATACCTGTTAAAATAGAAAAGTTACAAGCAATGAAAACCTTTGTTGTGCATGGAATA  
TGAGAATTCATAATAAGTGAGACTTTCTTTAGAAAGTTAAAAGGCAAGAATCTG

ATTTACTTTTTAAAAGAAATAAAAAAGTGGGTTACAAATGTACCTTGTGAAGAAAA  
GATTTGATTAGTCCTGGGATCTGTGCTTACAAATCCAAATAGGAAACAAGAATATG  
ATGCACTACTTTCAAGTAGTTAGGGGGTTAAGTTATCCAATTTGTATTGGATCAGAT  
TGTCTTGTACGAATGGGATCCTATGTAGATTTAATTAACCATATGTTATGGTCTCGAT  
TGGAAAATGATCCCAAACCTCTTAAAGGTACTATACAGTCTTTGAAATCAGGACAAA  
CTGTGCCACAGGCATGTCAGGTAGTGAGTGAGTTTACATTTACTATACTGAGTAATG  
TAATGAATTTTCCTCTCCAAATTAATATAAAAAGGGGTCAGGAAATATCTGATTAC  
TGGCTTTCTTTGAACCAAGTAAAGAATTTGTTAATATGGGTTTAAAAGTTTATGGAA  
CTCCTTGTTTAGATGTGAGTAAAAGGTTACATATTTGTTGGTTCAAATGCAACTCC  
CAAGACTATTGTTTTGGAGAAAGATACTGAAATTGGAGTATTAGTTGAAAAATCATT  
TTATGATTTAGAATTGGCCATCCCTGTTATTGGAAAATTACCAGAAAACATAACTGG  
GGGGGGGGGTGAGTTTGAAGAAAGTGTTAAAACCTATCCTAAAGGCTTAATTACAA  
TCCAATCAATCTGGCCATATGATAAGGATCATACTTATCAATGTAAAATAGAACCTG  
ATTGTTTGATCTTAGAACGAAAAGAGTTGTTGGAAAATGAGACTGATACAGTTAAA  
ACTGTAAATGCAGTTACTGTTGAAGATTTTTTCAGAAAAAATTGAAGGAAAAATTGA  
GTTAGGTGAAAACCAAATTTTCCTGAATTTGAACAAATGGTAAAACAACAATTG  
AAGCTGCTGATGCTTTAGAATCTGATTCTGAAAGGGAACAATTAAGAAAAATGTTCC  
TTGATTTTAAAGATCTTTTTGCTAAAGATGCATATGATTGTGGAGAAACAGATTTGC  
ATATAACTAAAATACCTACAGATTGCAACAAAAAACCCACATTTGTACGACAATAC  
AGAATACCATTATCGTCCTATGAATCTGTGCAAGAAATTTTACATACTTTGATGGAA  
AGAGAAATTATTAGAGAATGTAATTCTACATACAATTCTCCTATTTGGCCTGTTTTGA  
AACCAAATGGAAAGTGGCGACTTACAATAGATTACAGGCAATTAATAAACAAGTG  
CCTTTGTCTCATTGGCCTATGACCTATCTGGATCAAATTTGACAAAAATTGCTGGTG  
CAAATATTTTACTACATTAGATATAGCTAATGGTTTTTGGACTGTAAAAGTAGATC  
CAAAGATCAATATAAATTGGCTTTCTCTTTTGGTAAGAGACAATATACTTGGAAATA  
GATGTCCTTTTGGATATTTAAATCCCCTGCAGATTTCAATATTTTCTTACACAAAGC  
AATGCCAGATGCTGAAGAAAGAGGAAATTTGATATATGTGGATGATATATTGATAA  
AAAGCAACTCAGCTTCAGATCATTAGATGAGATTAGGTATGTTCTTACTCAGCTGA  
AAAATGCTGGTGCTAAATTGTCATTAACAAAAGGACAATGGTGTAGAAAGCGGGTA  
AATTATTTAGGATATGATGTTGGACCAGATGGACTTCGTCCACAACAGAACAGGATT  
AAAGCTATTCAAGCTATCAGAAGTCCTACTAATAACAGAATTACGTAGTTTTCTT  
GGAATTTGTAATTATTCTCGTCAATTCATTGAGAATTATGCAGAAATTTACAACCA  
CTCACAAAATTGTTAAGGAAAAATGAACCATGGGTATGGGAATCTACACAAGAAAA  
TGCTGTAAGTGAATTAAGGAAAGGCTTAGTAAAGTCCATGCCTTGCCTATCCAGA  
GAAAGATAAAGAATTTTCTAGAAACAGGTTATACTGATTCTAGTATCAGTGCAGT  
ATTGTACCAAAAACATGACACAGATAACAGAGTAGTTGCTTATGCAAGTAAAACCTC  
TTAGTGAGGTTGAAAAGAAATTTTACAGATTGTGAAAAGGCACTTTTTTCTACAGTTT  
GGGCTGTACAATATTTTAGAAATTACATAAAGGAGAAAAATTAATAATTGAAACA  
TGTCATCAGCCATAGCTTTTCTGGGGAGCCAGAAAATTAGAGATGGTAATGTTTCT  
AGTAGTAGAATAGTGGCCTGGACTTTAGCACTTCAGGGATTACCTTTTGAAGTTAAA  
TATGCTAAAAATAAGAAAAACATTTTGGCACAAGGAATAGCTGAATTACATGATTG  
TACTGCTACTGAACAAGAAAAACAAAATTGTGGTTGTAATTTAGATTTGCCATTACC  
TTTGAATCTAATAGACATCTTGTATATAATGAAAATGTTTGCCAAAATCTTCCAAA  
AGCATATGTAGATGGTTGTTCTTTTACCCTGAAGGACAATTACAAGCAGGAATAGG  
AATATTTTGGGAAGGAAATTTCCATGTACTCCTTTGCAATATAAATTGGGACCCAA  
GTCTAGTCAATTTTCAGAAATTGCAGCTGTATTTGTAGCTATAGAACTGCAGTGAA

AAATAAATTGTCAGATATAGTGATATGTACTGATTTCAGATTATGCTAGACATAGTTT  
TTGTAAATTTTTGCCAACATGGAAAGCTAATGGAATGAAGAATTCTAGAGGAAAA  
CAGTAAAACATGCTGAACCTTATATTGGCTGTTGATCAATTGGTATTGGAAAATGAAA  
TAACAGTTTACTGGAAAAAGGTAAAAGGCCATGCTAAAGACTCTAGTCAAGATAAG  
TATGGAAATGATTTGGCTGATAAGCTAGCAAAGAAGGAGCAATTACAGGTGAACT  
GTGGGAGTTTAAGCCTATTCCACAAGTAAATGTTAATGTGGTTACTAGACAAGAAAG  
TAAACAAAAGCCAATTAATACTGTGTTACAGTTGTGCAGTGAAGTACCTAGTTTTGA  
TTTAGTCAAAATGCAGAAGGAGGATGATACTTTAGGAAAATTTTATCAGTATATTGA  
AAATCCTGAAGAAAATGAGATTTACCTTATGACCTTCAAACAAAATTTTGAATTAAG  
ACAATGTTTAATAAAAAACAAAAATTTTCAGTTAAGAAATGGATTGTTAATTCGAAT  
AGGTAAATCTGGAATGATTCAGTGGGTTGTCCCTTTGTCTTACAGAGGGATAATGTT  
ACAACATGCTCATGATGAAGAATGTGGAGGTCACAGAGCAGATAGAGCTACTTATG  
AAACTTAAACAAGTGGCCTACTGGCCAAATATGTACCAAGATGTACAAGATTAT  
ACAAAAGGTTGTTTAGTTTGTGTTAGGTTTCAGTCTTCTCCTAAACATAGAGCTC  
CATTGCAAACAAAAGGAATTACTATGCCTTGGTCTGATTTACAGATAGATTGGATAG  
GACCAGTTACTAGATCTTCCAGAGGAAATAAGTATCTACTTACAGTAACTTGTAT  
TTACAAAATGGATAGAATGTTTACCAGCACCTAATGACACTGCTGAAACTACAGCTA  
TGTTATTGATAAATCATGTGTTTAGTTGTTGGGATTTACCAATGAGGATAGAGTCTG  
ATAGAGGTTCTCATTTTACTGGAAAAGTGATAGAAAATGTTTGGAACTCTTGGAG  
TTCAAAGGAAATTACATGTGTACATCACCCACAATCCTCAGGACAAGTGGAGCGT  
GCAAACAAAACACTATAGTGAATATCTTAAAGAAATATATTTCTACTTCTGGTAAAAAT  
TGGGATGTGAAGTTACCATTAGTCTTAATGGCAATAAAAGCTACTCCTAATAAATCT  
ACAGGTGTCACACCTTTTGAATGATGACAGGAAGAGAAATGACTTTACCCTTACAT  
CTTTTGTACAGGACTTATGATGTAAATTTAGCAAGTGCTACAACACTTTTACTATG  
TGACAAATTTAAAGCAACATCTTCAAAGTACTTTTGGCTTTTGGCTCAAAGAATTTGG  
ATAAAAGTGCTCAAGGTAGAAAAGCATATTATGATAAAAAGACAACACTGTAAAAGAG  
TATGAAATTGGAGACAAAGTATTCTACTTTAACTACAGTAGAAAATAATGCAAAGT  
AAAGAAATTTTACCAAGCTGGAATGGTCCACATATTATTACAGATAAAGTCTCATC  
TGTGGCTTATCAAATTAACCTAAAAAACCTACAGGAGATGAAGTTTTCAAGTGGGT  
ACATATAAACCAACTTAAACCCTATTATTCTCAAAGAGAACACAAACCAATGAAA  
CAGAAAATACAGAATGA

> Loki-Lch consensus sequence Pol protein

LTSDTSKNTDLKLTGLRKHKFFLGNLIPKGERYYVKVDLQEMYSCEALIDTASEVTLITQ  
SMFDKLIDVIGKKKNFRILPCDLHLIDYGGNSQKPCGKVVWIKVKIGKMSVTHPVYITNKC  
EEEFLLGNDLLKRLSPVMDYLHEILWSQVNRPIPYGKYLQDREKKVETCFIEQEDSKLKL  
NFIRSANPTLLVLGDPNKLVTWKDRDNFVPISKEKIVKTELEPNGLNFFLSPTEADAFDC  
LTQQQKTVSNVDVANSSSLQENDKGKSLTHPRELCCIEKEQGFLYIPVKIEKLQAMKTLL  
CMEYENSLISETFFRKLKRQESDLLFKRNKKWVTNVPCEEKDLISPGICALQIQIGNKMN  
MHYFQVVRGLSPYICIGSDCLVRMGSYVDLINHMLWSRLENDPKPLKGTIQSLKSGQTV  
PQACQVVSEFTFTILSNVMNFPLQINIKRGQEISDSLAFPEPSKEFVNMGLKVYGTPLD  
SKRFTYLLVQNATPKTIVLEKDTEIGVLVEKSFYDLELAIPVIGKLPENITGGGGFEFESV  
KTPKGLITIQSIWPYDKDHTYQCKIEPDCLILERKELLENETDVTVKNVAVTVEDEFSEKI  
EGKIELGENQNFPEFEQMVKQQIEAADALESDSEREQLKKMFLDFKDLFAKDAYDCGET  
DLHITKIPTDCNKKPTFVRQYRIPLSSYESVQEILHTLMEREIIRECNSTYNSPIWPVLKPN  
GKWRLTIDYRQLNKQVPLSHWPMTYLDQNLTKIAGAKYFTTLDIANGFWTVKVDPKD  
QYKLAFSFGKRQYTWNRCPFGYLNSPADFNIFLHKAMPDAEERGNLIYVDDILIKSNSAS

DHLDEIRYVLTQLKNAGAKLSLTKGQWCRKRVNYLGYDVGPDGLRPQQNRKAIQAIR  
SPTNITELRSFLGICNYSRQFIENYAEISQPLTKLLRKNEPWVWESTQENAVSELKERLSK  
VPCLAYPEKDKEFFLETGYTDSSISAVLYQKHDTDNRVVAYASKTLSEVEKKFSDCEKA  
LFSTVWAVQYFRNYIQGEKLIETCHQPIAFLGSQKIRDGNVSSSRIVAWTLALQGLPFEV  
KYAKNKKNILAQGIAELHDCTATEQEKGQNCGCNLDLPLPLESNRHLVYNENVCQNLPK  
AYVDGCSFHREGQLQAGIGIFWEGNFPCTPLQYKLGPKSSQFSEIAAVFVAIETAVKNKL  
SDIVICTDSYARHSFCKFLPTWKANGMKNSRGKTVKHAELILAVDQLVLENEITVYWK  
KVKGHAKDSSQDKYGNDLADKLAKEGAI T GELWEFKPIQVNVNVVTRQESKQKPINT  
VLQLCSEVPSFDLVKMQKEDDTLGKIFYQYIENPEENEISPYDLQTNFELRTMFNKKQKF  
QLRNGLLIRIGKSGMIQWVPLSYRGIMLQHAHDEECGGHRADRATYETLKQVAYWPN  
MYQDVQDYTKGCLVCCRFSQSSPKHRAPLQTKGITMPWSDLQIDWIGPVTRSSRGNKY  
LLVTCLFTKWIECLPAPNDTAETTAMLLINHVFSCWDLPMRIESDRGSHFTGKVIENVW  
NTLGVQRKLVHSHHPQSSGQVERANKTIVNILKKYISTSGKNWDVKLPLVLMAIKATPN  
KSTGVTPFEMMTGREMTLPLHLLYRTYDVNLSAATTTFDYVTNLKQHLQSTFAFAQKN  
LDKSAQGRKAYYDKKTTVKEYEIGDKVIFYFNYSRNNAKVKKFLPSWNGPHIITDKVSS  
VAYQIKLKKPTGDEVFKWVHINQLKPYYSQKRTQTNETENTE\*

> Loki-Lch consensus sequence *env* gene

TTGATTAAGGGACAAATTCCTACTTATCTTGTTCCCTCAAGAAATTGTTTATGATGCAT  
TCAAACAAATTTCAAGGAATCCTATTGAACCAATTCAGATACAAGTTGCATATAATA  
TGGGAAGTGCTATTCCTATTTATCTGAATGCTGAAAATTTGGAAATTGCTTTTGT  
AAATTTGCCTTATATAATTCAGATAATGTTTATCAACTAAAATCTGTCTTGAATGTA  
GGTAATTGGCATAGAGATGTCTACGTAAGTGAATACTCCAGAATTGGTAGCCTAT  
CAAGAATATAACCCAGGACAGTATTTGATTCCAAATTTAGAAATGTGTAAAAAGGC  
AAAAGATATTCATTGGTTATGTCCTGGAAAACCTTTCTTAAAAGATACTACTGAAGT  
TTTATGTGGTTTACTTCAGAAAATGTTATGGAAAAGTGTAAAATTGGTATGACTAA  
ATTGGATGATTTTCTGAAACAAAAGTTGCTATTGCAAATGCACAGTGGTTAGTTAG  
TATTCCTCTTAAAGAAATCACAGTATCATATAGTAAACATGATGTACTGACTAAAAT  
GATTTTACCAAGTAATATTTCAATTAATTAATGTTTCTTAAAGACACTATCGTATATGTT  
GGTGTGTTTCTCTGTATTACTTAGAACAGAATATTCATGAAGCAAACATAGAAATC  
CTTGATGTTTTCAAAGGACATGAACTGAACTGGGGAGATGACATCAATTATTTGTTG  
AACTATAAAAACCTCCACACTATAGAAATGAGTGTTAA

> Loki-Lch consensus sequence Env protein

LIKQIPTYLVPQEIVYDAFKQISRNPPIPIQIQVAYNMGSAIPIYLNAENLEIAFVLNLPYII  
PDNVYQLKSVLNVGNWHRDVYVKVNTPELVAYQEYNPGQYLIPNLEMCKKAKDIHWL  
CPGKPFKDTTEVLCGLTSENVMEKCKIGMTKLDDFSETKVAIANAQWLVSIPLKEITVS  
YSKHDVLTKMILPSNISLITVPKDTIVYVGDVSLYYLEQNIHEANIEILDVFKGHELNWGD  
DINYLLNYKNFHTIEMSVX

>Loki-Lro consensus sequence

TGGTACTAGTTAATCTCTAAAGGTGTATTTTCAATGTATGAATGTATCTCTGGTTTA  
ATATCTCCTAGATGTTTCATTCTTGGTATCAAACAATCTGCACTTTATTTTCTGAAC  
AATGGTGTACACCATGTGATTAGAAAATGCATCATACTGTTTGTACTATATTGTGGG  
TAAACTGCATCAATCCCCAGGCCAGCAATAAACATGCAAATGGGCCATAAATGG  
AGACAAAGAGAAGTTCTCCCGCTCAGCAATACAACTTTGTATTGGCCAATTCACCC  
AAAGGTGGGTGTGGTAGGGAACTATCAAAGACCCTAACACCAACCCATCCAATG  
CTCAAACCCTTCGAGACACTCTCCAAGACTCTCCCTTGAGTCAATTTCCGGTAGTT  
TATCTTCAAGTAACTTTGTGCGACTCGCTGTGGATTTTCTATCTTCGAACGAACTAGA

GAAAACCTCCGGAACACCTAAAGGAATTCATCGAGAACTTCCATTGTCTACCGCATC  
AGGACTCTTGTTGAGCAACAAAGCCAATGCAAGTAACCTTTACAACCTATTAGATGC  
GCGTTTTAAGTTGAGCCCCTGTTTAAGGTGATTTTGCTTCTCTGATGATTCTCATGTG  
GTCGCTGGTTAACTGATGCTAAATACTGCCATTCTTGCCTCTCTGTCTGCTCTCTCTC  
TCTCTCTCCTTTCTCACTCTCTTTCTCTATGTATATGTACACGTGTTTTGCTTAGTT  
AGTTGTATGTTAACTGTAGTTCCATTTATTA AATTGCATATATTCACAATTGATTGTC  
TCTGTGTGCTGCTCACAATTTGAAGTCACTGAATATTTGATCTTGCTACATGCTACAT  
TTTGAATTTACTACGAGTTAAGTTACTGCTAGTACTAACTGAAGTAGGAAATGTATT  
CTTTCTTGGCCAGAAAGTAACCTTTCCTAGAATTGATGAATGATTATACTGTCTATTC  
GGTGGACGAACAGATCAAATAATTGTAACGTTAATTCTGCTACAGTTGATTCTAAGA  
TCTGATTA AATATTCATAATTAATTATAACCAGTTATAATTAATCATAAATATTTCCC  
TTTTGAGCTAATTTATTACAGATTTATGGTGGAGAACGAGTGGCAATATTCAAACTT  
TGTTTTGTGAGCAAACCTGGAATTAATCTAATTGTTAGATATATGTTTTTTATATTAC  
GCGCGCTTAGAGTGAGACAAGTCGCAACGCGAACTCACTTTTCTGATTGGACGGCTT  
AAAGCCACCCCCAGA ACTTTTAAACAGCATCTATTTGTCTAACATTTAGTCACTGCTA  
ATTGTTGATATAAACTGCAGTTCATAATATTA A AATTGTTCTGTAAAGACGAAGAAA  
TCTCTTTGCAGTACATTTTAAATATTATTAGAGTCGCCTGTTGGAACGAAGAAATCTTC  
CTTCACCGCGATAAAGATTGATTTGAGCGATGTTCCCTCTCTTCATCTTTTTAAAAGGC  
CTTATTTGATGATATCGCTAGATTGAAGTCATTACATGTTAATTTCACTCACTAGAC  
GATCTCACTCCCTTAGGTTTAAATCATTAGAGTAGCTTACTAATGTGTGCCTAACGTAC  
AGATCTGATCACAAGAACACTGCGAGCCAGTAACTGATTGGAATGTA AATGGGAGT  
TTTTACAATCTTGATCAAGTGATAAATTTTGTAAACAGCGAAGAAACCCTGTTGCATA  
TAATTGTTATTGGGTAAACAACAGCAAAGAAACCCTGTTGCTATAATTGTTATTGGGT  
AACAACAGCGAAGAAACCCTGTTGCTTATAATTTTATTGTGTAACAACAGCGAAGA  
AACCCTGTTGCTCATAATTTTTAGTGTGTACTGGCAGCGAAGAAATCCTGCTACACA  
TAATTGTGCAGTTAAGTTGCACAAACTCTAAGAATCTGTGGGTTCTAAATCACATTG  
TTCTTGTGATAGCTGCAATAAATCGGCCGTTAAGTCCTAACGCGTTCAGATTTATGC  
ACGATTGGAGTTAAGGCACAGTACCTATGACTAACACTAGAGGGCAGGCTGTTTAA  
GTTTCTAACACCTCTTAAACTCCACCTCAACCCTTTGGTTTTCACGGTGCCTGGGCTCA  
CCACTCCATCTTGTGGGCATTCTCAGTTAGGTTAACTTCTCACTCCCCAAGTCCTTG  
CATTTCATTTTGTGTTGTTTATTTTCCATCTATTTGTTTTATCATTATTTTCTCACC  
ATCTTGGTTACCTCCAGTTTTATTTATCTACTTTATTATTGTTTTGTCTTACCTTTTTA  
TTTTATTTCAATTATCAATTTAGTTTTATTTTTATTTTTATTTTATTATTTTTTTTT  
TTATTTACGTTTTTCTCTCCCTCTTCTCTCTCATTTCACTACCCACTCATTTAAATTTAA  
TTTAAACAGAGTTTGAATTTAAATTTAAAGTTAATTTCTGTATCTAACTACTTGTGTT  
TGCTATAGGTAGCACTCCCCCTAGTGCTTAGTTGGTGAAGTGACTGGACCGCGTCCG  
ATCCATCACTAAGCCTAGCCATAGAATACAGATCCATCCAGTTGGTGAAACCCCAA  
ACTAGGTTTTTCTCAATCTTTCAGGA ACTTAGCCTGCTCCTGCTGTCCCAACAAGGC  
CAAAACCCCGAATGTTATGACCCAGCAGTGCCCCCTACGCTGTGGGCCCCTGTCATAA  
CCCCGACAGCAGTGAAAGGCCTAAACCTGCTCTCTCTTCTATCTCTATCTGTGTTTG  
ATTTGTTGGTTTGTGTTTAAATTTTGTGTTTGTGTTTGCATAGAGACCAACCTTTGAG  
AATCATCAGGGAAGGCTGAGTAATAGATTGACGACCCAAGCTGCCAAAGTCTTTAG  
ACGATCACGCTGTCAACAATCTTTAGTTAGACCCTTCCGGTGCCCCACAACAAGTAG  
ACACACCTGACCATTCTCGGCCGAGATAACAGGTGCCCGGTCTACACTTCGCTAACT  
GTTTGTACCCAAACCGTACCAAGCGAATATAGTTAATAGTATTGCAGCCGCTAACAC  
TGTAAGGACTTGCATTGGCCCTTTTTGCTGTCTTTCTCTCTCTCAGTGAGCCACCAT



GTCTCGTTCATCCAGCCCTGATGCCCACTGGGATCGACTAGAGGCCTGGCTGAGTGC  
CATGACGGGTACCCTTCTGCCTGACGCCGCTGGTGGCCTGCAGCACCTGAGCCGGGA  
ACAGCTTGACGACAACCTGAGTGGCTTGATGTCCATGATCCCACGCAGGACTACA  
ACCACAAAGACCTCGCCAAGATCATCGGGTCACTTGCCACAACCTCCTCGCTCAGG  
CAAGGCTGAGCGAAGCAAGCATCTCCCGCCTGGAACAGGAAGCAGCCGCGCTAAAG  
CTCCGAGCTGAGGAGGCTCAGAGGGACCTGGCACTTGCCCAAAGTCAACTGGACCA  
GCTGGAGACGGAGACACCGCAAAGTGACTCTGAAAGGGAAATGCACACCACAGAA  
TTTCCATAACCAGTAAACTAGTGCCTCCTAGTCAAGA ACTCTCACTCCAGAAGGGG  
GGTCAAAGCCCCCTTCCCAAGACATCTCCTGCCAGCATCCAGAACACCCACACCA  
GCACGGGGGTGGGAGCCTTTCAAGGGAACACTGCCTACCAGTCACGGTGTAGCCCC  
CAAAGAACTAGACAAGCTGGCCAGAAACATTCCCATGTTTACCCCGAACCCCTGCAG  
GAGGCCATGACGTGCACGCCTACCTGAAAGACATTAATTTCCACTTGCAAGGTGTGG  
CCAATGTAACCACACGAGACAGACTTTACCTGCTCAGAATCACCTCCAGCCGTGAG  
GTGCGAAGCTTCTAGATCGACAGCCCGAAACGGTCAAAGCGGATTACCAGCAGCT  
ACAACAGGCTTTGATCACGGAATTTTCTGACCCAGAGTCAGAACAAGGACTGATTAC  
TGCCATGGACCTCAAACAGGCCCGACAAGAAACCTCGCAAGCCTACTACACCAGGC  
TCCGACAGGCCTACTTCGGGGCACGGAACGAGCCAGGAATGGAAGAGGACTTTAAC  
TTCAAGACTCTGTTCCCTCCGGAACATGCACCCTACAGTGAGTCACCACTTGGGGGTC  
TTGGCTTGCCACGAAGCATGTCCATTCAACAGCTGCGAGACTTAGCCCACAAGGCC  
TATGTCAAACAAGAGCTGCTTCGGAAAAGACTGTGAAAACCCCCACAATTTGCCCT  
GTCTCTGATCAGAGTCCAGA ACTGGCTCTAGAGGGCGCCCAACAACACTACAGTGA  
CAAACCTTTCAACAAGATGTCAAGGCCATTCCCTGCCAGCAGAGGGCAGTATGGCC  
ATGGCGGTGCCCGTTCCAAGCATCGAACAGAGCGCCCTGAGACATCCTGGGACAAG  
CCACAGCCAGCCTTCCACCCGAAGGGAGGAACCACGTGGGAAGGAAAAAGACGGC  
ACAAGGGCAGTCGACCTTCCCCAGCTCAAGCATCAAGCTCGAACTGCCAGCTACAG  
AATCCCTTTAAACATGCCCTAGCCCAGCCAAAGTCTGAACCATCAGGAGAGCAGGA  
CAGAGAAGCTACA ACTGAGTCAGCAGAGATCCTGAGGCTTTTAAGGGGACTTCTCC  
GAGAAAAGCACAACAAGGGAGACAAGAGGGACAAGCCAGATCAAGCATGACTAAG  
CATGGGATCTCACCTCAACTCCCACTCAGAGAACTCTCAA ACTGAACCTCACAACCA  
GATCACTGCTAATCCACTGTCAACCACAGAACCAGATACTTCTCACCAAGTGATGT  
CCGCACTCAACCGTCTCAGCAGACTGTTGAACTGCCAGAGCCAACCAACATCCAAA  
GCCACACTTCCAGCCAGGATTCCAACGTGCCTGAGAGTGCAGTTTTTGGTAGTCTGCC  
TCCCCGACGAGCCACATGAGACCAGCCCTGACTGCCTGGCAGTCAACACACAAGTC  
CCAGTGCCAAGACTCCTGGGAAACCTGATCGAACGGGGGGTGGCTAAAAAACTTTA  
CCTGGTCATCACATTGGAAAAGGAGGTGAGACTGGAAGCCCTCGTAGACACTGGAG  
CCGACCTGACTTTAATGTCCAGCCAGCTTTTTCGACAGACTTCAGACTGAAGCCAAGA  
GACAGAATCGAACTCTGAAATATCAGCAGTGTGTGCTGAATGTGCAGTCATACAGC  
CAGAATGAGGTCCA ACTTGAACAAGTAGCTCCCATTCACCTGACTATCGGCCCTATG  
AGTTTGGTGCACCCTGTGTACATCGCTCCAGTTGACACCTACCCTCTTCTCATTGGCA  
AAGACCTGCTAGACCGCTTTGAGCCCCTGTTAGACTTTAAACAGCTGAAAATCTGGG  
CTCAAGTGCGAGAGCCTCTGCCTCCTCAGTCTCCAAGGTCACCCGAGACAGACTGCC  
AGGCCACCAAGGTCACAGAAAATCCCACCGCCAGCCGTGGGAACGTCTCAACCCAA  
GAGCAAGGTTCAAGGTCGATGCTCTGTGCTTTCCAGCTAGACAAAGACTTTGACTCA  
GATGGCCCCCAAATTTCTGGCAGGCCTACAGCTGAATGATGTCACAACAACAGACCT  
CATACTGGCACTGTGGGCAGACA ACTCGGCTATCAGCCTCACACTTTTCAACGCTCT  
CAAGAGACACACAACAACATCTCCTTTGCCAACAAGCGCACACGTTTCGCTTTGAA

CCCCGGCCTGTCAACCCTGGTGACTGCCAAGGTCATCTGTGCCCTGAACTTGAATTG  
GAATGACAGGTGCTTAACGCATTACTTCCTGGTCCTGCCAGACCTACCGCATGATGT  
TTACATCGGAGCGGACCTTCTGATTCGCCTCAAGGCTCACGTGGACCTGCTAAATGG  
AGTAATATGGGCCCAATGACCTCACAGGCTCTGCTGTTCTGTCAACCCCGAGAA  
TCTCTGTCAAGGCCAAACCATTCCCGAGGCTGCACACTAATCAGCGAACAAGAGA  
CTGTAATACCAGCTTACACCAAAGGGGTCGCTGTTTCGACTCAACCTGCGATGTGGCC  
AAACCCTCAGCCACAGCCTAGGCTTCTTCCAGCCTTCACCCGAGTGTGTGGAAGTGG  
GCCTCACTCTAGAAGCCACCCCTCTCGTTGAAGTGACATCTCGGGCCTTGTACATCC  
TGTTCAACAACTGCATGGCAATGGATGTCAGAGTGCCTAAAGCCTACCGTCTGGGTT  
GGCTAGTGAGTTATGACTTCCAGGACTTTGAACTTGTTTTACCAGTAATTGGACCTCT  
CCCTGTTTTCCATGATTCCAGAGGGGAGCTCAAGCCACACAGTGTGACAGTACCTTT  
CAAGATCATCACCATCCTCTCAGTCGTGCCAGTGGTCAAGGAGCAGGTGTGCAGAA  
CAGAGCTAACGGTGGACCAACACCTTGTGTGTACACAGTCTCTAGCCATCCCACCT  
GCGAGACTGACAACGCTACTGCACCCCGACTGTCCACCAAACAGATGATGTAAAG  
ACAGGAGAGCCGTACCCTGGTTTTGAGACACAAGTTCAGCAAATTCTGAGGGATGC  
TGATGCCCTACGGGAGGATGCAGATCGCCACAACTTCGTCAAGTCTGTACAAATA  
CAAAGACTCATTGCCAAGGACTCTTAGACTGTGGCCTCACTGACCTGCATGTGGT  
GCGAATCCCAACGCACCCAAAAGCTCCACCCACCTTTGTCAAGCAGTACAAGATTCC  
TCTCGAATCGTATGAACCTGTGCAGGACATCATCACCTCGATGCTTGAGAAGGGTGT  
CATCCGTCCATGTAACAGCACCTACTCTGCCCCATCTGGCCTGTCCTCAAACCAA  
CGGCAAGTGGCGGCCAACCATCGACTATAGGAAGCTGAATCAACAGGTGCCATTAT  
CGCGGTGGCCCATGACACAGCTGGAACAGGAGATACCAAGAATCAGAGGAGCTAC  
AATCTTCTCCACGCTTGATGTGGCCTCAGGATTTTGGACTATAACCAGTGCATCCAGA  
TGATCAACACAAGTTAGCCTTCCGTTTTGACAATCGTCAATACACGTTACAAGGTG  
CCATTCGGCTATGCCAACTCACCCGCCGAATTTAACATCTTCCTCAACAAGGCGTG  
CCAGATGCCAGGGTAAGAGGAAACCTTGTTTTTGTGGATGATATCCTCCTGAAACA  
CACAACGGTGGCTGATCATCTGAAGGAGATCGACCACATCCTGAACCAACTGACTA  
CCGCTGGTGCCAAGATTGCCCTTCAAAAGGACAATGGTGCAAAATCAAAGTCAAC  
TATGTGGGCCTGCTCATCGGACCACAGGGCATCGAGCCACAAACCAACCGTATCCA  
GGCCATTCAAAACATCAAGCCTCCTGCCAACGTCTCAGAACTTCGCAGTTTCCTAGG  
TGTGTGCAACTATTCACGTCAGTTCATTGAGAATACTCCGACATTGCACGCCCTCTC  
ACTGCACTCCTGAAAAAAGACTGCCCATTCATCTGGACAGACACTCAGCAAGATGC  
CATGAATGAACTGAAGCAGCATTTGTGCACTGCACCATGCCTGGCTTACCCGGATCC  
ACAGAAGGAGTTCTATTTGGATGCTGGATTCTCCAGCCACTGCCTTAGTGCCGGTCT  
ATACCAACGGCATGACCAGGACAGACGCGTGGTCGCGTATGCCAGCAAGACCCTGC  
TTCCACCAGAGTGCAAATACTCAGACTGTGAGAAAGCCCTGCTCTGTACAGTATGGG  
CAATCCAGAGATTCTCCAACATCGGAGCACAGAAGGTGATCATAGAGACCTGC  
CACCAGCCTGTACCTTTCTCAACAGCCAACGTATCCGCGACGGCGTTGTCACAAAC  
GCCCGCATAGCCACATGGCTAATGGCCCTCCAGGGGCGTAATGTGGAAGCACGCTA  
TGCTCAAAACTACAAGTCGGCGCTGGGTAACGGCCTGGCAGCTTGCCAAAGCTGCT  
CTGATGACACACCAACGGTGTGTCGTAAGCTGAAACGCCCCCAGACCTGCCGCTT  
ACCTGCCACAGGTATTTGGAAGAGAGCGTGTGCCAAGGCATGCCACAGCCTACGT  
CGATGGGTGTTTCGTACAACCACGAAGGCCTCCTAAAGGCAGGTGCAGGCGTTCTCTG  
GCTGAACGATCGACCGTGCCACCACAACACTTCAAGTTGGGCCCCCAGTCATCACA  
ATATGCTGAGGTAGCAGCTATTCTCATAACCCTGCAAATAGCATCAGCTCATAACAT  
CAGAGACCTGCTTATTTGCACAGACTCTAACTATGCCAGACTTAGCTTCACATGCCA

TCTTCCAAACTGGAAACAAAATGGCTTCAAGACAGCAAACAACAAACCGGTGAAAC  
ACCAACACCTGTTCCAGATCTGCGATGACCTCACAAGTAAACACGACATGATCATCT  
ACTGGAAAAAGGTGAAAGGTCACTCAAAGCAACCTGGCACAGACAAAGACCTCAAT  
GACCAAACAGACGCCCTTGCCAAAGCAGGGGCACTACACGGCGAGTTATGGACTCC  
ACCAACCCACCCACCCACCCCTAACGTGGCAGCCATAACCCGCAGCAAACGAACTG  
TACCCACCACAGTACCCACGTACAGCCACTAATGCTGGCTCCTCAAATCTCCACGA  
ATGACATTGCTGACATGCAAGCTACTGACTCCTCCATACAAATATTCTTCACCACC  
TCTCTGACCCCTCCAACCACCCTATCACACCTGCTCAGCTCGCTAATGCCCAAGCC  
TAAACGGCTACACGACCTCAAACCCATGCTGCGTGTGATGGACGACATTCTTTGGT  
ATGTCCCTGACGACAACGCTGCACCAAGGCTTGTGGTGCCGCAGGGCCAAAGGGGG  
GTCTGGTTGATGAATGCACACGACGCAGCATGTGCGGGACATCATGGCACAAGAGC  
CACGTACGAGACACTTAAACAAGTGGCATACTGGCCCCGGCATGCAGCAAGATGTGG  
CAGAGTATGTGAAAGGATGCCTTGTGGTGTCAATTCCAACCGGCAAACCCAAACC  
ACAGAGCTCCACTGCAGCGCAGAGGAGTACATTTCCCTTGGTCTGACCTGCAAATTG  
ACTGGGTAGGGCCCCCTACCCAGATCAACAAGGGGCAACAAGTATTTCCCTCACAGTT  
GTATGCCAGTTCACCAAGTGGGTGGAGTGCCTTCCAGCACCCAATGACACGGCCCA  
AACTACCGCATACTCCTGATGAATCACATCTTCTCCAGGTTCCGGGCTACCGCTGAA  
AGTCAACTCAGACAGAGGCACCCACTTCACAGCTGAGATCATGCAGCAGATTTGGA  
AACTTCTGGGAATACATGCTCAACTGCACATCAGCCATCACCCAATTTCTTCGGGTC  
AAGTGGAACGATCTAATCAGACCGTGGTCAGCATGCTAAGGAAATATGTTTCTGCCA  
ACCAGAAAGACTGGGATGTGAAACTTCCCTTAGTGCTCATGGCCATCAGAGCAACTC  
CAAATGAATCAACAGGTGTGTCGCCCTTTGAACTAATGACCGGGCCGGCTAATGACAT  
TGCCACTGCACCTGCTGTACCAGCCAGGAGACTCAAACCTTGTACCGCTTACACCA  
CACATCAGTACCTTGATGAACTACGCCGTCATTTGAGATCCACATTCGCTTTCGCC  
AACACGACTCCAAAAGAGTGCAGAAGGCCAAAAAGCATACTACGACCGCAAGGC  
GTCACACGCAGAACTGGATGTGGGTGACAAGGTTTGGTACTACCAGTACGCACAGC  
CACCTCAGACAACCTCTCATCGGCTGTCAAAGAAGTTCCTGCCACACTGGACAGGAC  
CTCACGAGATTGTGGACAACTATCCCCTGTTGCATACCGGATCAAACCTGAGCAGGG  
GACAGAAAGATCCAGTTTTCAAATGGGTCCACCGTAACCAGATCAAGAGACATGTG  
GCTGCTGGCAGGGAAAGGCAGGGGGGGGCTAGTGCTTAGTAGGACCTGCTGTAGTT  
CTGCAACAAAGAACTGTCCTGAACAGCCGAGAACCTCCCTCACTGACCCACTGCCTT  
TCTTCTTCTTCTTCTTCTTCTTCTTCTTCTTCTTCTGAAATCAGGATGCTGCTGTGGCTCTCCC  
TTCTGTGTCTCCAGCTAACCCGAGGACAGCTGCAACCTGATATCACCTCACCGGGTC  
CAGCATCAGGCATTGTACTGAGGGACCAAGCTGGACTCCTCATCACCAACTGCAGG  
ACTCACACTCAGAAAGTGTGTTGTCAGACTTGACCCTCGAAAGGTCTACCTAACACAC  
TACCCCCAGGCGACAGCCCACTACAGTTGGAGAGCTGCCCTATGGACTGAGAATGC  
CCTCCTTACGCAGAGGCTGACACCAAACACATGCTCACTCAGTTGCAGAAGATGA  
CTGTCACCCAGTCAGAGTTAAGTGGACACAACAGACGCAACAAACGTTTTCTCGGG  
GCTCTGCTCGGAGCTGCCGCTGCTGTTGGAACCTCTATTCAACCTGGGGGTGACCAGC  
ATTAACCTCTGTGAGCCTGTCTACCCTGAGACAACACGTGAAGGAGATCCAGACTGA  
GATTTCCCAGCTGAGAGAACATCTCACGCAACAGGGCGAAACCTACAGACTATAG  
GCAAATCATTAAGGGGCACCTTGGTGGTTCTCAACACCCACAGTGTCTGCTGAACC  
AACTGTGAACTCCATGAAACAGTTATTCTCTGTCATACAGAATGATGTTGCCACA  
TTCAGCTGGTAGCCTCCCTAATGTCAGACATGCTGCGGGAGGTGAGCTCCTCCATTG  
ACAGCTTAGCCATGGGTAGGATTCACCATATCTGGTGCCGCTAAGCCTAGTACAGA  
CTGTGTTGTCTCGATCACCACTCATCCACCTGACTCTCTTCAAGCCCACCTCGCCTA

CTCCCTGGGAGGGTCCATCCTGCTGCATGTCGACCCTGAACAGAGTGAGCTGGCTTT  
TCTCCTGAATCTACCCATTGTTGAATCCAACAACATTTATAGACTCAAGGACATTGTT  
AATGTTGGGTTTTGGCAAGGAAACACTCACATCACGATAAACACCCAGATGTTGTG  
GCCTATCATGACAGCAACCCACAGCTATACCTGGCTCCGAACCTGCGCATGTGTACC  
CTGACCAAAGACATTCACTATCTCTGCCCCAGCAAGCCATTCCTTCGAGACAACAG  
GAAGGAATCTGCGGTCTGCAACCCATGCAGAGAGACATGGTCTGTCCCCTGAGGC  
CAAGCCTCGCACCCAGGTACAGAAACACGAGCAGAGATCGTGGGAAACCAGTGGC  
TTGTCAACACTCCCATCCGCACAGCCACACTGACTTATGACCAGCACGACACTGCCA  
CCCGTGTGAGCCTGCCCAACCAGAGTATGTGGATTCAAGTACCCAAGGGAGCCATC  
CTCCACCTAGGTGACCTGGCACTATACCATCTCCCAAGTGAAGAATACCAATCCGAG  
ATAGAAATTCCAGCCTTCTTCAGGAATCAGAATCTCACCCCTGGAACCTGAATTGGAA  
CTGAGCATTGAGGAAGGGGGTCCCAGACAATCGACATCACCCCACTCGACACGGC  
CCTCCAAGCTCTGTCCCGCCTGCCTGTCTAAACAACCTTTCCCGTTGCACGGTCTTG  
ACCGCCGCCGACACGGCACTTTGCCTCGCCACAGCAGTCGGGTACACCCTAACCTT  
GGCCTTGCCTTCGTCCTGTTCAACAGAGTCAACGGGGTGCAGAGGTCCATGAACAG  
TGCACCGCTGCCCTTCTCGGACCTTCAAACGGAAACACCGGAAAATGCTATATTAG  
CCCAGTTACCCCTCGTTATTGGTACTAGTTAATCTCTAAATGTGTATTTTTCAATGTA  
TGAATGTATCTCTGGTTAATAACCTTCTAGATGTTTCATTCTTGGTATCAAAACGATC  
TGACTTTATTGTATGAACAATGGTGTACACCATGTGATTAGAAAATGCATCATACT  
GTTTGTACTATATTGTGGGTAAAACCTGCATCAATTCCCCAGGCCAGCAATAAACATG  
CAATTGGGCCATAAATGGAGACAAAGAGAAGTTCTCCCGCTCAGCAATCAAACCTT  
GTATTGGCCAATTCACCCAAAGGTGGGTGTGGTAGGGAAACTATCAAAGACCCTA  
ACACCAACCCATCCTTGCTCAAACCCTTCGAGACACTCTCCAGGACTCATCCTTTGA  
GTCAATTTCCGGTAGTTTATCTTCAAGTAACTTTGTGCGACTCGCTGTGGATTTTCT  
ATCTTCGAACAAACTAGAGAAAACCTCCAGAACACCTAAAGGAATTCATCGAGAAC  
TTCCATTGTCTACCGCATCAGGACTCTTGTTTCAGCAACAAAGCCAATGCAAGTAACC  
TTTACAACATTTAGTTGCGCGTTTTAAGTTGAGCCCCTGTTAAGGTGATTTTGCTT  
CTCTGATGATTCTCATGTGGTCGCTGGTTAACTGATGCTAAATACTGCCATTCTTGCC  
TTCTCTCTCTCTCTCTTTTCTCACTTTCTTTCTCTATGTATATGTACACGTGTTTTGC  
TTAGTTAGTTGTATGTTAACTGCATTTCCATTTATTAATTGCATATATTCACAATTG  
ATTGTCTCCGTGTGCTGCTCACAATTTGAAGTCACTGAACATTTGATCTTGCTACATG  
CTATATTTGAGTTTACCACAAGTTAAGTTACTGCTAGTACTGACTGAAGTAGGAAA  
GTTATTCTTTCTTGGCCCGAAAGTAACCTTTCTAGAAATTGATGAATGATTATACTGT  
CTATTCGGTGGACGAACAGATCAAATAAATTGTAACGTAAATTCTGCTACAGTTAATT  
CTAAGATCTGATTAATAATTCATAATTAATTATAACCAGTTATAATTAATCATATTT  
CCCTTTTGAGCTAATTTGCTACA

> Loki-Lro consensus sequence 5'LTR

TGGTACTAGTTAATCTCTAAAGGTGTATTTTTCAATGTATGAATGTATCTCTGGTTTA  
ATATCTCCTAGATGTTTCATTCTTGGTATCAAACAATCTGCACTTTATTTTCTGAAC  
AATGGTGTACACCATGTGATTAGAAAATGCATCATACTGTTTGTACTATATTGTGGG  
TAAAACCTGCATCAATTCAGGCCAGCAATAAACATGCAAATGGGCCATAAATGG  
AGACAAAGAGAAGTTCTCCCGCTCAGCAATACAACTTTGTATTGGCCAATTCACCC  
AAAGGTGGGTGTGGTAGGGAAACTATCAAAGACCCTAACACCAACCCATCCAATG  
CTCAAACCCTTCGAGACACTCTCAAGACTCTTCCCTTGAGTCAATTTCCGGTAGTT  
TATCTTCAAGTAACTTTGTGCGACTCGCTGTGGATTTTCTATCTTCGAACGAACTAGA  
GAAAACCTCCGGAACACCTAAAGGAATTCATCGAGAACTTCCATTGTCTACCGCATC

AGGACTCTTGTTTCAGCAACAAAGCCAATGCAAGTAACCTTTACAAC TATTTAGATGC  
GCGTTTTAAGTTGAGCCCCTGTTTAAGGTGATTTTGCTTCTCTGATGATTCTCATGTG  
GTCGCTGGTTAACTGATGCTAAATACTGCCATTCTTGCCTCTCTGTCTGCTCTCTC  
TCTCTCTCCTTTCTCACTCTCTTTCTCTATGTATATGTACACGTGTTTTGCTTAGT  
AGTTGTATGTTAACTGTAGTTCCATTTATTA AATTGCATATATTCACAATTGATTGTC  
TCTGTGTGCTGCTCACAATTTGAAGTCACTGAATATTTGATCTTGCTACATGCTACAT  
TTTGAATTTACTACGAGTTAAGTTACTGCTAGTACTAACTGAAGTAGGAAATGTATT  
CTTTCTTGGCCAGAAAGTAACCTTTTCTAG AATTGATGAATGATTATACTGTCTATTC  
GGTGGACGAACAGATCAAATAATTGTAACGTTAATTCTGCTACAGTTGATTCTAAGA  
TCTGATTA AATATTCATAATTAATTATAACCAGTTATAATTAATCATAAATATTTCCC  
TTTTGAGCTAATTTATTACA

> Loki-Lro consensus sequence 3'LTR

TGGTACTAGTTAATCTCTAAATGTGTATTTTTCAATGTATGAATGTATCTCTGGTTTA  
ATACCTTCTAGATGTTTCATTCTTGGTATCAAACGATCTGCACTTTATTGTATGAAC  
AATGGTGTACACCATGTGATTAGAAAATGCATCATACTGTTTGTACTATATTGTGGG  
TAAACTGCATCAATTTCCCAGGCCAGCAATAAACATGCAATTGGGCCATAAATGG  
AGACAAAGAGAAGTTCTCCCGCTCAGCAATCAAACCTTTGTATTGGCCAATTCACCCA  
AAGGTGGGTGTGGTAGGAACTATCAAAGACCCTAACACCAACCCATCCTTGCT  
CAAACCCTTCGAGACACTCTCCAGGACTCATCCTTTGAGTCAATTTTCCGGTAGTTTA  
TCTTCAAGTAACTTTGTGCGACTCGCTGTGGATTTTCCTATCTTCGAACAAACTAGAGA  
AAACCTCCAGAACACCTAAAGGAATTCATCGAGA ACTTCCATTGTCTACCGCATCAG  
GACTCTTGTTTCAGCAACAAAGCCAATGCAAGTAACCTTTACA ACTATTTAGTTGCGC  
GTTTTAAGTTGAGCCCCTGTTTAAGGTGATTTTGCTTCTCTGATGATTCTCATGTGGT  
CGCTGGTTAACTGATGCTAAATACTGCCATTCTTGCCTTCTCTCTCTCTCTCTTTTC  
TCACTTTCTTTCTCTATGTATATGTACACGTGTTTTGCTTAGTTAGTTGTATGTTAACT  
GCATTTCCATTTATTA AATTGCATATATTCACAATTGATTGTCTCCGTGTGCTGCTCA  
CAATTTGAAGTCACTGAACATTTGATCTTGCTACATGCTATATTTGAGTTTACCACA  
AGTTAAGTTACTGCTAGTACTGACTGAAGTAGGAAAGTTATTCTTTCTTGGCCCGAA  
AGTAACCTTTTCTAG AATTGATGAATGATTATACTGTCTATTCGGTGGACGAACAGA  
TCAAATAATTGTAACGTTAATTCTGCTACAGTTAATTCTAAGATCTGATTA A AATATT  
CATAATTAATTATAACCAGTTATAATTAATCATATTTCCCTTTTGAGCTAATTTGCTA  
CA

> Loki-Lro consensus sequence *smc-gag* gene

ATGTCTCGTTCATCCAGCCCTGATGCCCACTGGGATCGACTAGAGGCCTGGCTGAGT  
GCCATGACGGGTACCCTTCTGCCTGACGCCGCTGGTGGCCTGCAGCACCTGAGCCGG  
GAACAGCTTGACGACAACCTGAGTGGCTTGATGTCCCATGATCCCACGCAGGACTA  
CAACCACAAAGACCTCGCCAAGATCATCGGGTCACTTGCCCAACCTCCTCGCTCA  
GGCAAGGCTGAGCGAAGCAAGCATCTCCCGCCTGGAACAGGAAGCAGCCGCGCTAA  
AGCTCCGAGCTGAGGAGGCTCAGAGGGACCTGGCACTTGCCCAAAGTCAACTGGAC  
CAGCTGGAGACGGAGACACCGCAAAGTGACTCTGAAAGGGAAATGCACACCACAG  
AATTTCCATAACCAGTAAACTAGTGCCTCCTAGTCAAGAACTCTCACTCCAGAAGG  
GGGGTGAAAGCCCCCTTCCAAGACATCTCCTGCCAGCATCCCAGAACACCCCA  
CCAGCACGGGGGTGGGAGCCTTTCAAGGGAACACTGCCTACCAGTCACGGTGTAGC  
CCCCAAGA ACTAGACAAGCTGGCCAGAAACATTCCCATGTTTACCCCGAACCCCTG  
CAGGAGGCCATGACGTGCACGCCTACCTGAAAGACATTAATTTCCACTTGCAAGGTG  
TGCCAATGTAACCACACGAGACAGACTTTACCTGCTCAGAATCACCTCCAGCCGTG

AGGTGCGAAGCTTCCTAGATCGACAGCCCGAAACGGTCAAAGCGGATTACCAGCAG  
CTACAACAGGCTTTGATCACGGAATTTTCTGACCCAGAGTCAGAACAAGGACTGATT  
ACTGCCATGGACCTCAAACAGGCCCCGACAAGAAACCTCGCAAGCCTACTACACCAG  
GCTCCGACAGGCCTACTTCGGGGCACGGAACGAGCCAGGAATGGAAGAGGACTTTA  
ACTTCAAGACTCTGTTCCCTCCGGAACATGCACCCTACAGTGAGTCACCCTTGGGGG  
TCTTGGCTTGCCACGAAGCATGTCCATTCAACAGCTGCGAGACTTAGCCCAACAAG  
CCTATGTCAAACAAGAGCTGCTTCGAAAAGACTGTGAAAACCCCCACAATTTGC  
CCTGTCTCTGATCAGAGTCCAGAAGTGGCTCTAGAGGGCGCCCAACAACACTACAGT  
GACAAACCTTTCAACAAGATGTCAAGGCCATTCCCTGCCAGCAGAGGGCAGTATGG  
CCATGGCGGTGCCCGTTCCAAGCATCGAACAGAGCGCCCTGAGACATCCTGGGACA  
AGCCACAGCCAGCCTTCCACCCGAAGGGAGGAACCACGTGGGAAGGAAAAAGACG  
GCACAAGGGCAGTCGACCTTCCCAGCTCAAGCATCAAGCTCGAACTGCCAGCTAC  
AGAATCCCTTTAAACATGCCCTAGCCCAGCCAAAGTCTGAACCATCAGGAGAGCAG  
GACAGAGAAGCTACAAGTGTGAGTCAAGCAGAGATCCTGAGGCTTTTAAGGGGACTTCT  
CCGAGAAAAGCACAAACAAGGGAGACAAGAGGGACAAGCCAGATCAAGCATGA

> Loki-Lro consensus sequence Smc-Gag polyprotein

MSRSSPDAHWRLEAWLSAMTGTLIPDAAGGLQHLSREQLDDNLSGLMSHDPTQDY  
NHKDLAKIIGSLAHNLLAQARLSEASISRLEQEAALKLRAEEAQRDLALAQSLDQLET  
ETPQSDSEREMHTTEFPITSKLVPPSQELSLQKGGESPLPKTSPASIPHPPTARGWEPFKG  
TLPTSHGVAPKELDKLARNIPMFTPNPAGGHDVHAYLKDINFHLQGVANVTTRDRLYLL  
RITSSREVRSLDRQPETVKADYQQLQALITEFSDPESEQGLITAMD LKQARQETSQAY  
YTRLRQAYFGARNEPGMEEDFNFKTLFLRNMHPTVSHHLGVLACPRSMSIQQLRDLAH  
KAYVKQRAASEKTVKTP TICPVS DQSP ELA LEGAQQHYSDKPFNKMSRPFASRGQYGH  
GGARSKHRTERPETSWDKPQPAFHPKGGTTWEGKRRHKGSRPSPAQASSNCQLQNP  
KHALAQPKSEPSGEQDREATTESA EILRLLRGLLREKHNKGDKRDKPDQA\*

> Loki-Lro consensus sequence *pol* gene

ATGGGATCTCACCTCAACTCCCACTCAGAGAACTCTCAAACCTGAACCTCACAACCAG  
ATCACTGCTAATCCACTGTCAACCACAGAACCAGATACTTCCTCACCAAGTGATGTC  
CGCACTCAACCGTCTCAGCAGACTGTTGAACTGCCAGAGCCAACCAACATCCAAAG  
CCCACTTCCAGCCAGGATTCCAACGTGCCTGAGAGTGCAGTTTTGGTAGTCTGCCT  
CCCCGACGAGCCACATGAGACCAGCCCTGACTGCCTGGCAGTCAACACACAAGTCC  
CAGTGCCAAGACTCCTGGGAAACCTGATCGAACGGGGGGTGGCTAAAAAACTTTAC  
CTGGTCATCACATTGGAAAAGGAGGTGAGACTGGAAGCCCTCGTAGACTGGAGC  
CGACCTGACTTTAATGTCCAGCCAGCTTTTCGACAGACTTCAGACTGAAGCCAAGAG  
ACAGAATCGAACTCTGAAATATCAGCAGTGTGTGCTGAATGTGCAGTCATACAGCC  
AGAATGAGGTCCAACCTGAACAAGTAGCTCCATTACCTGACTATCGGCCCTATGA  
GTTTGGTGACCCCTGTGTACATCGCTCCAGTTGACACCTACCCTCTTCTCATTGGCAA  
AGACCTGCTAGACCGCTTTGAGCCCCTGTTAGACTTTAAACAGCTGAAAATCTGGGC  
TCAAGTGCGAGAGCCTCTGCCTCCTCAGTCTCCAAGGTCACCCGAGACAGACTGCCA  
GGCCACCAAGGTACAGAAAATCCCACCGCCAGCCGTGGGAACGTCTCAACCCAAG  
AGCAAGGTTCAAGGTCGATGCTCTGTGCTTTCCAGCTAGACAAAGACTTTGACTCAG  
ATGGCCCCCAAATTCTGGCAGGCCTACAGCTGAATGATGTCACAACAACAGACCTC  
ATACTGGCACTGTGGGCAGACAACTCGGCTATCAGCCTCACACTTTTCAACGCTCTC  
AAGAGACACACAACAACATCTCCTTTGCCAACAAGCGCACACGTTTCGCTTTGAAC  
CCCGGCCTGTCAACCCTGGTGACTGCCAAGGTCATCTGTGCCCTGAACTTGAATTGG  
AATGACAGGTGCTTAACGCATTACTTCCTGGTCCTGCCAGACCTACCGCATGATGTT

TACATCGGAGCGGACCTTCTGATTCGCCTCAAGGCTCACGTGGACCTGCTAAATGGA  
GTAATATGGGCCCAATGACCTCACAGGCCTCTGCTGTTCCCTGTCAACCCCGAGAAT  
CTCCTGTCAGGCCAAACCATTCCCGAGGCCTGCACACTAATCAGCGAACAAGAGAC  
TGTAATACCAGCTTACACCAAAGGGGTGCTGTTGACTCAACCTGCGATGTGGCCA  
AACCTCAGCCACAGCCTAGGCTTCTTCCAGCCTTCACCCGAGTGTGTGGAACCTGGG  
CCTCACTCTAGAAGCCACCCCTCTCGTTGAAGTGACATCTCGGGCCTTGTACATCCT  
GTTCAACAACCTGCATGGCAATGGATGTCAGAGTGCCTAAAGCCTACCGTCTGGGTTG  
GCTAGTGAGTTATGACTTCCAGGACTTTGAACTTGTTTTACCAGTAATTGGACCTCTC  
CCTGTTTTCCATGATTCCAGAGGGGAGCTCAAGCCACACAGTGTGCGACAGTACCTTTC  
AAGATCATCACCATCCTCTCAGTCGTGCCAGTGGTCAAGGAGCAGGTGTGCAGAAC  
AGAGCTAACGGTGGACCAACACCTTGCTGTGTACACAGTCTCTAGCCATCCCACCTG  
CGAGACTGACAACGCTACTGCACCCCGACTGTCCACCAAACAGATGATGTAAAGA  
CAGGAGAGCCGTACCCTGGTTTTGAGACACAAGTTCAGCAAATTCTGAGGGATGCT  
GATGCCCTACGGGAGGATGCAGATCGCCACAACTTCGTCAAGTCCTGTACAAATA  
CAAAGACTCATTTGCCAAGGACTCTTTAGACTGTGGCCTCACTGACCTGCATGTGGT  
GCGAATCCCAACGCACCCAAAAGCTCCACCCACCTTTGTCAAGCAGTACAAGATTCC  
TCTCGAATCGTATGAACCTGTGCAGGACATCATCACCTCGATGCTTGAGAAGGGTGT  
CATCCGTCCATGTAACAGCACCTACTCTGCCCCATCTGGCCTGTCCTCAAACCAA  
CGGCAAGTGGCGGCCAACCATCGACTATAGGAAGCTGAATCAACAGGTGCCATTAT  
CGCGGTGGCCCATGACACAGCTGGAACAGGAGATACCAAGAATCAGAGGAGCTAC  
AATCTTCTCCACGCTTGATGTGGCCTCAGGATTTTGGACTATAACCAGTGCATCCAGA  
TGATCAACACAAGTTAGCCTTCCGTTTTGACAATCGTCAATACACGTTCACAAGGTG  
CCATTCGGCTATGCCAACTCACCCGCCGAATTTAACATCTTCTCAACAAGGCGTG  
CCCAGATGCCAGGGTAAGAGGAAACCTTGTTTTTGTGGATGATATCCTCCTGAAACA  
CACAACGGTGGCTGATCATCTGAAGGAGATCGACCACATCCTGAACCAACTGACTA  
CCGCTGGTGCCAAGATTGCCCTTCAAAAGGACAATGGTGCAAATCAAAGTCAAC  
TATGTGGGCCTGCTCATCGGACCACAGGGCATCGAGCCACAAACCAACCGTATCCA  
GGCCATTCAAACATCAAGCCTCCTGCCAACGTCTCAGAACTTCGCAGTTTCTAGG  
TGTGTGCAACTATTCACGTCAGTTCATTGAGA ACTACTCCGACATTGCACGCCCTCTC  
ACTGCACTCCTGAAAAAGACTGCCCATTCATCTGGACAGACACTCAGCAAGATGC  
CATGAATGAACTGAAGCAGCATTGTGCACTGCACCATGCCTGGCTTACCCGGATCC  
ACAGAAGGAGTTCTATTTGGATGCTGGATTCTCCAGCCACTGCCTTAGTGCCGGTCT  
ATACCAACGGCATGACCAGGACAGACGCGTGGTCGCGTATGCCAGCAAGACCCTGC  
TTCCACCAGAGTGCAAATACTCAGACTGTGAGAAAGCCCTGCTCTGTACAGTATGGG  
CAATCCAGAGATTCTCCA ACTACATCGGAGCACAGAAGGTGATCATAGAGACCTGC  
CACCAGCCTGTCACCTTTCTCAACAGCCAACGTATCCGCGACGGCGTTGTCACAAAC  
GCCCCATAGCCACATGGCTAATGGCCCTCAGGGGCGTAATGTGGAAGCACGCTA  
TGCTCAAAACTACAAGTCGGCGCTGGGTAACGGCCTGGCAGCTTGCCAAAGCTGCT  
CTGATGACACACCAACGGTGATCGTACAAGCTGAAACGCCCCAGACCTGCCGCTT  
ACCTGCCACAGGTATTTCGAAGAGAGCGTGTGCCAAGGCATGCCACAGCCTACGT  
CGATGGGTGTTGCTACAACCACGAAGGCCTCCTAAAGGCAGGTGCAGGCGTTCTCTG  
GCTGAACGATCGACCGTGCCACCACAACACTTCAAGTTGGGCCCCAGTCATCACA  
ATATGCTGAGGTAGCAGCTATTCTCATAACCCTGCAAATAGCATCAGCTCATAACAT  
CAGAGACCTGCTTATTTGCACAGACTCTAACTATGCCAGACTTAGCTTCACATGCCA  
TCTTCAAACCTGGAAACAAAATGGCTTCAAGACAGCAAACAACCAACCGGTGAAAC  
ACCAACACCTGTTCCAGATCTGCGATGACCTCACAAGTAAACACGACATGATCATCT

ACTGGAAAAAGGTGAAAGGTCACTCAAAGCAACCTGGCACAGACAAAGACCTCAAT  
GACCAAACAGACGCCCTTGCCAAAGCAGGGGCACTACACGGCGAGTTATGGACTCC  
ACCAACCCACCCACCCACCCCTAACGTGGCAGCCATAACCCGCAGCAAACGAACTG  
TACCCACCACAGTACCCACGTACAGCCACTAATGCTGGCTCCTCAAATCTCCACGA  
ATGACATTGCTGACATGCAAGCTACTGACTCCTCCATACAAATAATTCTTACCACC  
TCTCTGACCCCTCCAACCACCCTATCACACCTGCTCAGCTCGCTAATGCCCAAGCC  
TAAAACGGCTACACGACCTCAAACCCATGCTGCGTGTGATGGACGACATTCTTTGGT  
ATGTCCCTGACGACAACGCTGCACCAAGGCTTGTGGTGCCGCAGGGCCAAAGGGGG  
GTCTGGTTGATGAATGCACACGACGCAGCATGTGCGGGACATCATGGCACAAGAGC  
CACGTACGAGACACTTAAACAAGTGGCATACTGGCCCGCATGCAGCAAGATGTGG  
CAGAGTATGTGAAAGGATGCCTTGTGCTGTCAATTCCAACCGGCAAACCCAAACC  
ACAGAGCTCCACTGCAGCGCAGAGGAGTCACATTCCTTGGTCTGACCTGCAAATTG  
ACTGGGTAGGGCCCCTACCCAGATCAACAAGGGGCAACAAGTATTTCTCACAGTT  
GTATGCCAGTTCACCAAGTGGGTGGAGTGCCTTCCAGCACCCAATGACACGGCCCA  
AACTACCGCATACTCCTGATGAATCACATCTTCTCCAGGTTCCGGGCTACCGCTGAA  
AGTCAACTCAGACAGAGGCACCCACTTCACAGCTGAGATCATGCAGCAGATTTGGA  
AACTTCTGGGAATACATGCTCAACTGCACATCAGCCATCACCCAATTTCTTCGGGTC  
AAGTGGAACGATCTAATCAGACCGTGGTCAGCATGCTAAGGAAATATGTTTCTGCCA  
ACCAGAAAGACTGGGATGTGAAACTTCCCTTAGTGCTCATGGCCATCAGAGCAACTC  
CAAATGAATCAACAGGTGTGTGCGCCCTTTGAACTAATGACCGGCCGGCTAATGACAT  
TGCCACTGCACCTGCTGTACCAGCCAGGAGACTCAAACCTTGTACCGCTTACACCA  
CACATCAGTACCTTGATGAACTACGCCGTCATTTGAGATCCACATTCGCTTTCGCC  
ACAACGACTCCAAAAGAGTGCAGAAGGCCAAAAAGCATACTACGACCGCAAGGC  
GTCACACGCAGAACTGGATGTGGGTGACAAGGTTTGGTACTACCAGTACGCACAGC  
CACCTCAGACAACCTCTCATCGGCTGTCAAAGAAGTTCCTGCCACACTGGACAGGAC  
CTCACGAGATTGTGGACAACTATCCCCTGTTGCATACCGGATCAAACCTGAGCAGGG  
GACAGAAAGATCCAGTTTTCAAATGGGTCCACCGTAACCAGATCAAGAGACATGTG  
GCTGCTGGCAGGGAAAGGCAGGGGGGGGCTAGTGCTTAG

> Loki-Lro consensus sequence Pol protein

MGSHLNSHSENSQTEPHNQITANPLSTTEPDTSSPSDVRTQPSQQTVELPEPTNIQSHTSS  
QDSNPESA VLVVCLPDEPHETSPDCLAVNTQVPVPRLLGNLIERGVAKKLYLVITLEKE  
VRLEALVDTGADLTLMSQLFDRLQTEAKRQNRRLKYQQCVLNVQSYSQNEVQLEQV  
APIHLTIGPMSLVHPVYIAPVDTYPLLIGKDLLDRFEPLDFKQLKIWAQVREPLPPQSPR  
SPETDCQATKVTENPTASRGNVSTQEQGSRSMLCAFQLDKDFDSDGPQILAGLQLNDVT  
TTDLILALWADNSAISLTLFNALKRHTTNISFANKRTRFALNPGLSTLVAKVICALNLN  
WNRCLTHYFLVLPDLPHDVYIGADLLIRLKAHVDLLNGVIWAPMTSQASAVPVNPN  
LLSGQTIPEACTLISEQETVIPAYTKGVAVRLNLRGQTLSHSLGFFQPSPECVELGLTLE  
ATPLVEVTSRALYILFNNCMAMDVRVPKAYRLGWLVSYDFQDFELVLPVIGPLPVSMIP  
EGSSHTVSTVPFKIITILSVVPVKEQVCRTELTVDQHLAVYTVSSHPTCETDNATAPPT  
VHQTDDVKTGEPYPGFETQVQQILRDADALREDADRHLRQVLYKYKDSFAKDSLDCG  
LTDLHVVRIPHTPKAPPTFVKQYKIPLESYEPVQDIITSMLEKGVIRPCNSTYSAPIWPVLK  
PNGKWRPTIDYRKLNQVPLSRWPMTQLEQEIPRIRGATIFSTLDVASGFWTIPVHPDDQ  
HKLAFRFDNRQYTFTRCPFGYANSPAEFNIFLNKACPDARVRGNLVFVDDILLKHTTVA  
DHLKEIDHILNQLTTAGAKIALHKGQWCKIKVNYVGLLIGPQGIQPQTNRIQAIQNIKPPA  
NVSELRSFLGVCNYSRQFIENYSDIARPLTALLKKDCPFIWTDQDAMNELKQHLCTA  
PCLAYPDPQKEFYLDAGFSSHCLSLAGLYQRHDQDRRVVAYASKTLLPPECKYSDEKA



LLCTVWAIQRFSNYIGAQKVIIETCHQPVTFLNSQRIRDGVVTNARIATWLMALQGRNV  
EARYAQNYKSALGNGLAACQSCSDDTPTVIVQAETPPDLPLTCHRYFEESVCQGMPTAY  
VDGCSYNHEGLLKAGAGVLWLNDRPCPPQHFKLGPQSSQYAEVAAILITLQIASAHNIR  
DLICTDSNYARLSFTCHLPNWKQNGFKTANNKPVKHQHLFQICDDLTSKHDMMIYWKK  
VKGHSKQPGTDKDLNDQTDALAKAGALHGELWTPPTHPTPNVAAITRSKRTVPTTVPT  
SQPLMLAPQISTNDIADMQATDSSIQTILHLS DPSNHPITPAQLANAPSLKRLHDLKPML  
RVMDDILWYVPDDNAAPRLVVPQQRGVWLMNAHDAACAGHHGTRATYETLKQVA  
YWPGMQQDVAEYVKGCLVCCQFQPANPNHRAPLQRRGVTFPWSDLQIDWVGPLPRST  
RGNKYFLT VVCQFTKWVECLPAPNDTAQTTAYLLMNHIFSRFGLPLKVNDRGTHFTA  
EIMQQIWKLLGIHAQLHISHHPISGQVERSNQTVVSMRKYVVSANQKDWDVKLPLVL  
MAIRATPNESTGVSPFELMTGRLMTLPLHLLYQPGDSNLVTAYTTHQYLDELRRHLRST  
FAFAQURLQKSAEGQKAYYDRKASHAELDVGDKVWYYQYAQPQTTSRHSKFLPH  
WTGPHEIVDKLSPVAYRIKLSRGQKDPVFKWVHRNQIKRHVAAGRERQGGASA\*

> Loki-Lro consensus sequence *env* gene

ATGCTGCTGTGGCTCTCCCTTCTGTGTCTCCAGCTAACCCGAGGACAGCTGCAACCT  
GATATCACCTCACCGGGTCCAGCATCAGGCATTGTACTGAGGGACCAAGCTGGACT  
CCTCATCACCAACTGCAGGACTCACACTCAGAAAGTGTTTGT CAGACTTGACCCTCG  
AAAGGTCTACCTAACACACTACCCCGAGGCGACAGCCACTACAGTTGGAGAGCTG  
CCCTATGGACTGAGAATGCCCTCCTTCACGCAGAGGCTGACACCAAACACATGCTCA  
CTCAGTTGCAGAAGATGACTGTCACCCAGTCAGAGTTAAGTGGACACAACAGACGC  
AACAAACGTTTTTCTCGGGGCTCTGCTCGGAGCTGCCGCTGCTGTTGGA ACTCTATTC  
AACCTGGGGGTGACCAGCATTAACTCTGTGAGCCTGTCTACCCTGAGACAACACGTG  
AAGGAGATCCAGACTGAGATTCCCAGCTGAGAGAACATCTCACGCAACAGGGCGA  
AACCTACAGACTATAGGCAAATCATTAAAGGGCACCTTGGTGGTTCTCAACACCCA  
CAGTGCTCTGCTGAACCAA CTGTGAACTCCATGAAACAGTTATTCTCTGT CATA  
GAATGATGTTGCCACATT CAGCTGGTAGCCTCCCTAATGTCAGACATGCTGCGGGA  
GGTGAGCTCCTCCATTGACAGCTTAGCCATGGGTAGGATTCCACCATATCTGGTGCC  
GCTAAGCCTAGTACAGACTGTGTTGTCTCGATCACC ACTCATCCACTGACTCTCTT  
CAAGCCCACCTCGCTACTCCCTGGGAGGGTCCATCCTGCTGCATGTCGACCCTGAA  
CAGAGTGAGCTGGCTTTTCTCCTGAATCTACCCATTGTTGAATCCAACAACATTTATA  
GACTCAAGGACATTGTTAATGTTGGGTTTTGGCAAGGAAACACTCACATCACGATAA  
ACACCCAGATGTTGTGGCCTATCATGACAGCAACCCACAGCTATACCTGGCTCCGA  
ACCTGCGCATGTGTACCCTGACCAAAGACATTCACTATCTCTGCCCCAGCAAGCCAT  
TCCTTCGAGACAACACGGAAGGAATCTGCGGTCTGCAACCCATGCAGAGAGACATG  
GTCTGTCCCCTGAGGCCAAGCCTCGCACCCAGGTCACAGAAACACGAGCAGAGAT  
CGTGGGAAACCAGTGGCTTGTCAACACTCCCATCCGCACAGCCACACTGACTTATGA  
CCAGCACGACACTGCCACCCGTGTCAGCCTGCCCAACCAGAGTATGTGGATTCAAGT  
ACCCAAGGGAGCCATCCTCCACCTAGGTGACCTGGCACTATACCATCTCCAAGTGA  
AGAATACCAATCCGAGATAGAAATTCCAGCCTTCTTCAGGAATCAGAATCTCACCCCT  
GGAACCTGAATTGGA ACTGAGCATTGAGGAAGGGGGTCCCAGACAATCGACATCA  
CCCCACTCGACACGGCCCTCCAAGCTCTGTCCCCTGCCTGTCTAAACA ACTTTC  
CCGTTGCACGGTCTTGACC GCGCCGACACGGCACTTTGCCTCGCCACAGCAGTGC  
GGTACACCCTAACCTTGGCCTTGCCTTCGTCCTGTTCAACAGAGTCAACGGGGTGC  
AGAGGTCCATGAACAGGTGCACCGCTGCCCTTCTCGGACCTTCAAACGGAAACAC  
CGGAAAATGCTATATTAG

> Loki-Lro consensus sequence Env protein

MLLWLSLLCLQLTRGQLQPDITSPGPASGIVLRDQAGLLITNCRTHHTQKVFVRLDPRKVY  
LTHYPQATAHYSWRAALWTENALLHAEADTKHMLTQLQKMTVTQSELSGHNRRNKR  
LGALLGAAA AVGTLFNLGVT SINSVSLSTLRQHVKEIQTEIPQLREHLTQQGETLQTIGKS  
LKGTLVVLNTHSVLLNQT VNSMKQLFSVIQNDVAHIQLVASLMSDMLREVSSSIDSLAM  
GRIPPYLVPLSLVQTVLSSITTHPPDSLQAHLAYSLGGSILLHVDPEQSELAFLNLPIVES  
NNIYRLKDIVNVGFWQGNTHITINTPDVVAYHDSNPQLYLAPNLRMCTLT KDIIHYLCPS  
KPFLRDNTEGICGLQPMQRDMVCPAEAKPRTQVTETRAEIVGNQWL VNTPIRTATLTYD  
QHDTATRVS LPNQSMWIQV PKGAILHLGLDALYHLPSEEYQSEIEIPAFFRNQNL TLEPEL  
ELSIEEGGSQTIDITPLDTALQALSRLPVLNNFPVARSWTAADTALCLATAVGYTLTLGL  
AFVLFNRVNGVQRSMNRCTAALPRTFKRKHRKMLY\*

>Loki-Cne consensus sequence

CAGTGCTTTCGGCATA CAGCAGAAAAGAAATGAGTCGCCGAGAGAGT TTTACCGTC  
GTTTACGAGCTGCATATTTTCAGGGAGCGCCCCTGGACAGGAGGAAGACCACACAC  
TAAAATATCTGTTCCCTCCACAATCTTCATGAAAGCATCAAATACGATGTTACCATGT  
ACTGCCGAACCAGAACCCTTACCATGCAAGAAATAAAGAAGTATGCTCAGATGGCA  
TGGGAAACACGTGCTCGGGTCAACAAGGAACTGACCGGAGCAATAGGGTTTTACA  
GGTCCGGGCCGAAGGAGGTAAAGACCTAGAACTGGAGGGACGAGAGATTCCCTCCT  
CTGACAACAGATCCAGGAACGAATCCAAAGGACGTCAGAAGTTCAACCCACAGGAG  
AAGAAAGGGATGATGAGAGAAAGATGGAGTCGAGACGGGAAAGAAGGTAAGGAGT  
CCAATGTGAGAGTCAAACCGGACAGAGCGAAGTCTGACAGCCACCATGAAAAGAA  
GGTAAGGCCTAAAGATGCAGACGAGAAAGGACAACAACAGATGATGAGGGGAGATG  
GAGGCCACCTTACGCAGGCTGCTTACAGAAACGGTGCAACAGATGACCAACGCATC  
CCAGCCGCCAACAACTCCACCAATACCCGAAACAAACCAGATCCAAAACCTCCGT  
CCGCATGACTAGGCGTGGATCCAGACCCATCCACCAAAGGGTCTACCGGATTGAG  
TGGGGAACACAGCCCCTCGAACC GGGTGAATCCTCCGAAACCCACACAAAAC  
ACCGTTCTTGAGGTTCTTGGGTGAGCTCCATCTCACCAAAAACGCACGCCGCCTCTA  
TTGTTCTGCCGTAATAGGTGGGTGCATCACAGCTGATGCTCTTCTGGACACAGGTTT  
AGAAATTAGCCTAATGTGCGCCATGCTTTTCGAAAAGGTGATGAGAGCCATGAACA  
CCCTTGAAAACCAATCCAGGTGGAGACCTGCAATGTAGGGATCACCAGCTACACT  
CAACATAAGTCTTGCATCACCAAGCGGGTGTGGTTAGATGTCACCTCCGAGACATG  
ACTCTAATCCATCCTATCTACATTTGCACATTAGATACAGAACCCTTTCTGGTGGGCC  
AAGACCTACTGGACAGACTGGCCCCACTCATTGACTGCAACCAGGGACACCTGTGG  
GCCCAAGTGGAAAATCCAAAGCCGTTCCCCTCTACAGAGAAACAGCTTGTCCCTACC  
CATCTGGTAACATGTTCCAACGAGCCAGTGAAACACCAAGAGCAACCACTTCTCCT  
GCAGAACCGCTTTTCGGGGTTTCAGCTTCAAAGACACAGACGGACAACCAAAGTGC  
ATCTTTCCGCAGTCATGAATCCTTCTCTGCACTCTCACACCTTCCGATAATGAACCC  
TTAATCCCAGAGTGACTGAAGGCATTCACTTGGAAGATGTTTTCCAACCAATGCG  
GTTTTGGCCCTATGGTTGGAAAAGTCAGCCATAAGCAGAGGACTGTACCTTTCGCGA  
GGCGAAGCCTGCCTGGTTGAAGTAAGACGTTGCCACCACCTACTTTCAGACGATCGG  
CCCCGCCGACTCCTGAAGGCTACTGGGGTATGTATGCTTAAGGTAACATTGGATCC  
AAACACATATCACATACCTTTAGCATCGTGGAACATCCACTCACCCCGGTTCTGATT  
GGCGCCGACCTCCTGGTGCGACTAGGAGTACAACCTTGACACATGCAACCAGGTCTT  
GTGGGCCCGGGCCCGAACACCACCCTGTTCTTCTTGA AAAACCCGAGGTCATGAG  
GTCAGGGCAGACCATTCCCAAGCCTGCCAGGTTGCATGTGAAACAGACATGCTGA  
TACCAGCATATAACCACCGGTGTCCAGTCAGGCTAGTTATCCTTAAAGGTCAGGAAA  
TGAGAAACCCCGGGTCCATTTCCAACCTCTGCCTCACTTTCACGAACTGAATCTAG

TGGTCCGGGGAAACCCCTTGCTTGAGTTGAACAATCGTTCAACCTACCTCTTGGTTCG  
AAAATCCAACCGCGGTCCCAATCCCCTAAAACCGCTAAACCTCTCGGGGTGCTA  
ATCGATAGTTCGTTCCACGACTTCGAGTTGAGCATTCCCGTCATTGGAGAACTACCT  
TCTTCCCTGATCACCACACAGGGTTTCACAGACAGTGCCTCCACCTTCCCCTCGAAA  
ATGATAACTGTCAGAAGGGGAGAGGGCGCTGCCTGTCATATCCCTGTTTGGTGCCACT  
CTTGAAGCCGAAGGGAACCTTGGTAGTGTACTCGCTAGAAGCCCGTTCCACAAAAGA  
CAGCCAAGTGAACCTGCCCCGAGCCGTACCCAGGGTTCGAAGACGAAGTAAACCAAC  
AGTTAGAGAAGGCTGACGCTTTGTCCACTGAAGCTGAAAAAGTGGCACTCAGGGAC  
CTTTTCTACGAGTTCCAGACCATCTTATCCAGAGACTCTAATGACTGCGGGGTTACA  
GGTTTGCATACGGTCCGTATTCCCACGAAACCAACGCTCCTCCAACCTTCGTGCGT  
CAGTATAAAATTCCTCTAGCCGTTATGGCTCAATCCAAGAGATCCTCAATAAGCTG  
CTAGAGAAAAACATAATTCCGGGAATGCAACTCCACCTACAACCTCCCCATCTGGCC  
GGTGTAAAACCGACAGGAAAATGGCGTCTACCATCGATTACCGTGCTTTAAACAA  
GCAGGTACCGCTTTCGCGTTGGCCCATGATTCACTTAGACCAAGAAGTGGCAAAAGT  
GAAAGACGCCCGCTTCTTCTCAACCGTGGACGTGGCTAATGGCTTTTGGACAATGAA  
GGTGGACCCGGCTGACCGGTATAAATTGGCGTCTCTTTTGGGAACCGCCAATATNG  
GAACAGGTGTCCTTTCGGATACTCCAACCTACCAGCCGAGTTCAACATCTTCCTTCA  
TAAGGCGATGTCCGATGCTACAGAACGAGGAAACCTCATTATGTCGATGACATCCT  
AATGAGGAGCAGAACCTTCAAAGAACATCTTGAGGAAATCTGNCACGTTCTAGGCC  
AGCTAGCGGCTGCAGGAGCCAAGTTAGCATTAAAGCAAGGGTCAGTGGTGCAGGAAA  
AAGGTGGACTACGTAGGGCTCACGGTCGGACCAAACGGCATTGAACCTCAAGCCGA  
CAGAATCAGGGCCATCCAGGATATAGCAGCCCCGACCAACCTCTCCGAACCTCCGGA  
GCTTCTCGGGGTCTGCAACTACTCCCGTCAGTTTATCGAAGACTATGCAGACATGG  
CGAGGCCACTCACCGAGTTGTTACGCAAAAACACTCCGTTTCGATTTGGGAGAACCTC  
AGGAGCAGGCTTCCAATGGATGAAGCAGAAGCTGGTGTGACCTCCTGCTTAGCAT  
ACCCAGACAAGGACCGTGAGTTCTATCTGGAAGCCAGCTTCTCATCTCACTGCCTGA  
GTGCAGCACTGAGACAGAAATACGACCAGGACATGCGAGTCGTAGCATATGCGAGC  
AAACCACTAAGCGAGGTTGAAATAAAATTTTCAGACTGTGAAAAGGCCCTCCTCTCC  
ACAGTCTGGGCGGTGGAACACTTCCGCAGCTACATAGGAGGACAAAAGGTGATTAT  
CGAAACATGTCACCAGCCAGTAACTTTCCTAACAGTCAGCGTCTGAGGGAAGGGA  
GAGTGTGCAACAGCCGGATCGCGACATGGATGATGGCATTACAAGGCTACGACATT  
GAGGTAAGTACGGTCAAACAACCGGATGGCACTGGGACAAGGGCTAGCCGGAT  
GTAACCACTGCGAGTGCGATACACCTCAACCCCAACCTGACATACCCACAGCTGTG  
GGAACAACGCTCTCCGCCACCGCTATTATGATGAGAACATATGCAAAGGGCTCCC  
AAGAGTGTATACCGATGGCTGTGCGTTCATGCACGAACACCAACTCCGAGCTGGGG  
TAGGTATAGTTTGGACAGGAATCGACTCAATCCTCATCACGATCCAACAAGCAGCTG  
CCTTGAACCAGAAACAGCTAGTGATCTGCTCCGACTCCAACCTACGCTAGGCTTAGTT  
TCATCTCCCACCTACCCGTTTGGAAAACCTAACGGAATGAAGAACGCTAGGAATAAA  
GAAGTCAAACACTCAAATATATTCCTAGCATGTGAAAAACTCACACAGAGAACGA  
CATGACCATCTATTGGAAAAAGGTTAAAGGACATTCTCGCACCCCTGGGCCAAGACA  
AGGATGGAAACGACGAAGCAGACCGCCTTGCCAGGCTGGGGGCAGAGAGTGGAAC  
TCCCTGGGAGTTTCGTGAGGACTGGGCTAAGCCCGTTGAAAACCACACAGTTTGCAC  
CATAACGCGACAACAGGTAAGAGCCAACCAAAAACAAGCTCGGAAACGCTAAAGAG  
ATGCTCTGCCTCGGACGCAAACCAATGACCAGGACTTGTGTACCATGCAGGACCA  
AGATCCGACCCTGCACGCCATCAAGGAGTTGGTATGCAATGGTACGTCACCTGGAA  
ATCAACCATCACAACCTGGAGAACCCAAGGAGCTAAAGTCGTTTCGTCATAGCTTAC

CCCACTTGAGGATAGAAAAGGGGTTGCTAGTCTACTCCAAAGATGGACACGACCCA  
CTCCGATGGGTTCGTTCCAATGGATCACAGAGGAATCATGCTCGCTCACGCACATGAT  
TCGCCTGTGGGAGGACACAGAGGCTACAAAGCAACCCTACACACGCTTCAGCAGGT  
GGCATACTGGCCTTTAATGGCAAATGATNAACGAAGGGGGGTTACATTCCCATGGTC  
ACACATACAGATAGACTGGGTTGGACCGGTTCCGAGATCAGCAAGAGGCAACAAAT  
ACTTCCCTCACCGTAACCTGCAGCTTACAAAGTGGGTTGAGTGCCTACCCGCACCCA  
ACGACACAGCTACCACCACCGCGGTTCTCCTGCTGAACCATGTGTTTACGCCGTTGGG  
GCCTCCCACTGTCAGTTGACTCAGACAGAGGGACCCACTTCACTTTCGAATGTTATGA  
CGGCACTCTTCGAGATGCTAGGGGTTGAGGTCAGGTTTACATCTCATATCATCCCC  
AGTCATCAGGACAGGTGGAGAGGATGAACCGCACGGTGGTTAATATGCTAAGAAAA  
TATGTTGACAGCCATGCTAAGGACTGGGACGTCAAACCTGCCCTGGTCTGATGGCT  
ATCCGGTTCACACCGCAGACATCCACTGGCGTTACGCCCTTCGAGATGATGACAGGC  
AGGCAAATGACTCTTCCGCTACACCTTATCTATCAGCCAGAATATGTTAGCGTCACG  
ACTGCCTATACAGCACATCAATACGTCTCCGATCTGAAAGATCATCTTAGAGCAACA  
TTCGCATGGGCTCAAAAGAAATTAGAGGCCAGCGTGAAAGGAGCCAAGGCCTACTA  
TGACCGCAAGGCCACACACACAGAGTATGAAGTGGGAGATAAGATTTTCTACTTCA  
AATTTGCTCAACCACCCGGCCGAGCCAAAAAGTTCCTTCCACGATGGGCTGGACCAT  
TCGAGATCGTGGGAAACTCTCACCAGTGGCCTATAGAATAAGGACCTCCAAACCC  
AGGCAAGCACCTGAATACAGGTGGGTCCATGGGAATCAAATAAAACCTTAAATCC  
TCCTCCCAACCAACCAACGCGACACCGCCACGGAGGAAGGAAAAGATGCATAGA  
GCTGAAGTTGTGCATAACAAATAGGGCCAAAAGACACATAACCTGTACACACTCCG  
TCATAATTTGGGTCTCTCTATTGCAGATGGAGATCTTCTGGGTAATCGGCTTCTCCT  
GGGATCAACCATGGGCCAACCATCCAGTGTAATAGAGACAGGACCTCCAACCGGCA  
CCGCTCTCCAAGACACACCTGGACTACTCATCACACACTGTTANCTCCATACACAAC  
GGATGTTTCGTCGGACTCGATCCATGGGACGTGTACCGAAAACATATTAACCTACCGC  
CTCAAATAGGAGAAGGACGACAACAAGGCAGTCAGATCCGTGACACAGTGAACCAT  
GCCAAACATAACCACAACCCACATCCTTAAACAACCTCGAAAAGTATATGGTTACTGA  
ACAGGATCTCGTCGGAAGTAAACGCCCGAAAAGATTTTTAGGCGGACTCATAGCCT  
CTGTGGCCGCAGTCGGATCACTGTTTTCCATAGGCCTCTCAGCGGCAAATGCTGTTA  
GTCTGAAAACAATTCAAAGCATGTACAAGAACTGGACTCTGAAATGCCAGAAATC  
CAGCAAAGGCTCCTCATAACAACAAAACCTACTGAACATCCAGACAAAACACTTCA  
AGGCACAGTGGTCACGGTTAACCTACACTCTGCCCTTATAACAACACCATGCATGC  
ACTGGAAACACTGACAGAAGTGGTAAAGAATGATCTAATGTACACGCAAGTTGTGA  
GAGATTTAATGCAGGATCTCATCCGAGAGGTTGGTGAATCGGTAAACAGCCTAGCT  
GAGGGAAGGATCCCTCCTTACTTAGTCCCCGTGGAAGTACTAGTAAAATGTGCTGAA  
ATCCGCTGTCAGTGTCTGCAATCACCGCAAACCTCACCTGGCTTATAGCTTAGG  
TAGTGCAATACCAATCTTTGTAGATCCCGATAACTTAGAAATCGGATTCATGTTAAA  
TCTCCCAATCATTGAAAGAGCTAATGAGTATAGACTAAAATCAGTACTAAACGTTGG  
ATTTTGAAAGATAAAACCCACGTCCACTTAAAAACTCCGTCCATGTTGGCTTTCAA  
CGACGCCAACCCCGAGCTCTATTTGGTCCCTAACTTAGACTTATGCACCAAAAACCTAA  
AGAAATCCACTGGGTCTGCCCCAGCAACCCATTCTTAGAGATGTAACAGACCGCCT  
CTGCGGACTTACAGAACAACAACTGCCAAGCTAAAATGACTCTAAAAGATGCAGGAG  
TAGAAACAATGATAGAGCGCGCAGGTAATAAATGGCTAGTGAGTACACCAGCTACC  
GAAGCACTGCTGTCTACGAACTACACGACACAGTCACTAGAATTCACCTTCCCAAT  
CAAACAATGTTGATTTCAAGTTCCTCAAGGCGCCGTGATCCATACTAGAAGTGTGGTA  
AATGTACAACAGATGTCTGTGTCTCAATGTTTAGAAATACTGANNATAGTCTTACAC

CATCTCAATGTTGAACGATACGACTCAGAAATTGAAATTCTAGACGTCTTCAAAGGA  
TATAACTTCAGTATTGATGTCGAAATTGGAAAACAACCTCTAGCAGCAGGCACTCAG  
CTAGTTAAATTCAGCCTCACACCATCTGAATTA CTCTACCCACATTTCCATTATC  
GACAAGACAATGCCTGGCCAAATACCCACACCATGTCTATTCCGATCATTGTTTTTA  
TTTTTGGTTGGGTCATCACTACGATAATGACGTATAAGGCATACCAAAGATAAAGG  
TGTTACAGAATAAGTTCTATCAACCATCCATTATTATCTGCAGGACATTATATTTCC  
ACAACACTTTGTGCAAAGGACATTAAGGTTTCCCTTACTGAATGTAGTGAAACCGT  
TCAGGGGGTTTTTCGGGACCTTTCTGACCTCCTTGTCGCAGTTCCTGTCCATTATCAC  
ATTCTTTTCATTTGTCATATCCATTTTTTTTTGTCATATCCATCTATGATGCTGGGAGGT  
CGAGGGAACCGATGGCACAGCCAGCAACCCTCCATATTCTAGGTTTGAATTGGGTTG  
CTGTCTCCTTGGAATTCCACACACCTGTG

> Loki-Cne consensus sequence *pol* gene

TTGAGGTTCTTGGGTGAGCTCCATCTCACCAAAAACGCACGCCGCTCTATTGTTCT  
GCCGTAATAGGTGGGTGCATCACAGCTGATGCTCTTCTGGACACAGGTTCAGAAATT  
AGCCTAATGTGCGCCATGCTTTTTCGAAAAGGTGATGAGAGCCATGAACACCCTTGGA  
AAACCATTCAGGTGGAGACCTGCAATGTAGGGATCACCAGCTACACTCAACATAA  
GTCTTGCATACCAAGCGGGTGTGGTTAGATGTCACCTCCGAGACATGACTCTAAT  
CCATCCTATCTACATTTGCACATTAGATACAGAACCCTTTCTGGTGGGCCAAGACCT  
ACTGGACAGACTGGCCCCACTCATTGACTGCAACCAGGGACACCTGTGGGCCCCAAG  
TGGAAAATCCAAAGCCGTTCCCCTCTACAGAGAAACAGCTTGTCCCTACCCATCTGG  
TAACATGTTCCAACGAGCCAGTGAAACACCAAGAGCAACCACTTCCTCCTGCAGAA  
CCGCTTTTCGGGGTTTCAGCTTCAAAGACACAGACGGACAACCAAAGTGCATCTTTC  
CGCAGTCATGAATCCTTCTCTGCACTCTCACACCTTCCGATAATGAACCCTTTAATC  
CCAGAGTGAAGGCATTCACTTGGAAAGATGTTTTCCAACCAAATGCGGTTTTGG  
CCCTATGGTTGGAAAAGTCAGCCATAAGCAGAGGACTGTACCTTTCGCGAGGGCGAA  
GCCTGCCTGGTTGAAGTAAGACGTTGCCACCACCTACTTTCAGACGATCGGCCCCCGC  
CGACTCCTGAAGGCTACTGGGGTATGTATGCTTAAGGTAACATTGGATCCAAACAC  
ATATCACATACCTTTAGCATCGTGGAACATCCACTACCCCGGTTCTGATTGGCGCC  
GACCTCCTGGTGCAGACTAGGAGTACAACCTGACACATGCAACCAGGTCTTGTGGGCC  
CGGGCCCGAACACCACCCTGTTCTTTCCTTGAAAACCCGAGGTCATGAGGTCAGGG  
CAGACCATTCCCAAGCCTGCCAGGTTGCATGTGAAACAGACATGCTGATACCAGC  
ATATACCACCGGTGTCCAGTCAGGCTAGTTATCCTTAAAGGTCAGGAAATGGAGA  
ACCCCGGGTCCATTTCCAACCTCTGCCTCACTTTCACGAACTGAATCTAGTGGTCC  
GGGGAAACCCCTTGCTTGAGTTGAACAATCGTTCAACCTACCTCTTGGTCGAAAATC  
CAACCGCGGTCCAATCCCACTAAAACCGCTAAACCTCTCGGGGTGCTAATCGATA  
GTTCTGTTCCACGACTTCGAGTTGAGCATTCCCGTCATTGGAGAACTACCTTCTTCCCT  
GATCACACACAGGGTTTCACAGACAGTGCTCCACCTTCCCCTCGAAAATGATAAC  
TGTCAGAAGGGGAGAGGCGCTGCCTGTCATATCCCTGTTTGGTGCCACTCTTGAAGC  
CGAAGGGAACCTTGGTAGTGTACTCGCTAGAAGCCCGTTCACAAAAGACAGCCAAG  
TGAACCTGCCCAGCCGTACCCAGGGTTCGAAGACGAAGTAAACCAACAGTTAGAG  
AAGGCTGACGCTTTGTCCACTGAAGCTGAAAAGTGGCACTCAGGGACCTTTTCTAC  
GAGTTCAGACCATCTTATCCAGAGACTCTAATGACTGCGGGGTTACAGGTTTGCAT  
ACGGTCCGTATTCCCACGAAACCAAACGCTCCTCCAACCTTCGTGCGTCAGTATAAA  
ATTCTCTAGCCGCTTATGGCTCAATCCAAGAGATCCTCAATAAGCTGCTAGAGAAA  
AACATAATTCGGGAATGCAACTCCACCTACAACCTCCCCATCTGGCCGGTGTTAAAA  
CCGACAGGAAAATGGCGTCTCACCATCGATTACCGTGCTTTAAACAAGCAGGTACC

GCTTTCGCGTTGGCCCATGATTCACTTAGACCAAGAAGTGGCAAAAAGTGAAAGACG  
CCCGTCTTCTCAACCGTGGACGTGGCTAATGGCTTTTGGACAATGAAGGTGGACC  
CGGCTGACCGGTATAAATTGGCGTTCTCTTTTGGGAACCGCCAATATNGGAACAGGT  
GTCCTTTCGGATACTCCAACCTCACCAGCCGAGTTCAACATCTTCTTCATAAGGCGA  
TGTCGGATGCTACAGAACGAGGAAACCTCATTTATGTCGATGACATCCTAATGAGGA  
GCAGAACCTTCAAAGAACATCTTGAGGAAATCTGNCACGTTCTAGGCCAGCTAGCG  
GCTGCAGGAGCCAAGTTAGCATTAAAGCAAGGGTCAGTGGTGCAGGAAAAAGGTGGA  
CTACGTAGGGCTCACGGTCGGACCAAACGGCATTGAACCTCAAGCCGACAGAATCA  
GGGCCATCCAGGATATAGCAGCCCCGACCAACCTCTCCGAACCTCCGGAGCTTCTCG  
GGGTCTGCAACTACTCCCGTCAGTTTATCGAAGACTATGCAGACATGGCGAGGCCAC  
TCACCGAGTTGTTACGCAAAAACACTCCGTTTCGATTTGGGAGAACCTCAGGAGCAG  
GCTTTCGAATGGATGAAGCAGAAGCTGGTGTACGCTCCTGCTTAGCATACCCAGAC  
AAGGACCGTGAGTTCTATCTGGAAGCCAGCTTCTCATCTCACTGCCTGAGTGCAGCA  
CTGAGACAGAAATACGACCAGGACATGCGAGTCGTAGCATATGCGAGCAAACCACT  
AAGCGAGGTTGAAATAAAATTTTCAGACTGTGAAAAGGCCCTCCTCTCCACAGTCTG  
GGCGGTGGAACACTTCCGCAGCTACATAGGAGGACAAAAGGTGATTATCGAAACAT  
GTCACCAGCCAGTAACTTTCCTTAACAGTCAGCGTCTGAGGGAAGGGAGAGTGTG  
AACAGCCGGATCGCGACATGGATGATGGCATTACAAGGCTACGACATTGAGGTAAG  
ATACGGTCAAACAACCGGATGGCACTGGGACAAGGGCTAGCCGGATGTAACCACT  
GCGAGTGCGATACACCTCAACCCCAACCTGACATACCCACAGCTGTGGGAACAACG  
CTCTCCGCCACCGCTATTATGATGAGAACATATGCAAAGGGCTCCCAAGAGTGTAT  
ACCGATGGCTGTGCGTTCATGCACGAACACCAACTCCGAGCTGGGGTAGGTATAGTT  
TGACAGGAATCGACTCAATCCTCATCACGATCCAACAAGCAGCTGCCTTGAACCA  
GAAACAGCTAGTGATCTGCTCCGACTCCAACCTACGCTAGGCTTAGTTTCATCTCCA  
CCTACCCGTTTGGAAAATAACGGAATGAAGAACGCTAGGAATAAAGAAGTCAAAC  
ACTCAAATATATTCCTAGCATGTGAAAAACTCACACAGAGAACGACATGACCATCT  
ATTGAAAAAGGTTAAAGGACATTCTCGCACCTGGGCCAAGACAAGGATGGAAAC  
GACGAAGCAGACCGCCTTGCCAGGCTGGGGGCAGAGAGTGGAACTCCCTGGGAGTT  
TCGTGAGGACTGGGCTAAGCCCGTTGAAAACCACACAGTTTGCACCATAACGCGAC  
AACAGGTAAGAGCCAACCAAAAACAAGCTCGGAAACGCTAAAGAGATGCTCTGCCTC  
GGACGCAAACCAATGACCAGGACTTGTGTACCATGCAGGACCAAGATCCGACCCT  
GCACGCCATCAAGGAGTTGGTATGCAATGGTACGTCACCTGGAAATCAACCATCAC  
CAACTGGAGAACCCAAGGAGCTAAAGTCGTTTCGTCATAGCTTACCCCACTTGAGGA  
TAGAAAAGGGGTTGCTAGTCTACTCCAAGATGGACACGACCCACTCCGATGGGTC  
GTTCCAATGGATCACAGAGGAATCATGCTCGCTCACGCACATGATTTCGCTGTGGGA  
GGACACAGAGGCTACAAAGCAACCCTACACACGCTTCAGCAGGTGGCATACTGGCC  
TTAATGGCAAATGATNAACGAAGGGGGTTACATTCCCATGGTCACACATACAGA  
TAGACTGGGTTGGACCGGTTCCGAGATCAGCAAGAGGCAACAAATACTTCTCACC  
GTAACCTGCAGCTTCACAAAGTGGGTTGAGTGCCTACCCGCACCCAACGACACAGC  
TACCACCACCGCGTTCTCCTGCTGAACCATGTGTTTCAGCCGTTGGGGCCTCCCACT  
GTCAGTTGACTCAGACAGAGGGACCCACTTCACTTCGAATGTTATGACGGCACTCTT  
CGAGATGCTAGGGGTTGAGGTCAGGTTTCACATCTCATATCATCCCCAGTCATCAGG  
ACAGGTGGAGAGGATGAACCGCACGGTGGTTAATATGCTAAGAAAATATGTTGACA  
GCCATGCTAAGGACTGGGACGTCAAACCTGCCCTGGTCTGATGGCTATCCGGTTCA  
CACCGCAGACATCCACTGGCGTTACGCCCTTCGAGATGATGACAGGCAGGCAAATG  
ACTCTCCGCTACACCTTATCTATCAGCCAGAATATGTTAGCGTCACGACTGCCTATA

CAGCACATCAATACGTCTCCGATCTGAAAGATCATCTTAGAGCAACATTCGCATGGG  
CTCAAAGAAATTAGAGGCCAGCGTGAAAGGAGCCAAGGCCTACTATGACCGCAAG  
GCCACACACACAGAGTATGAAGTGGGAGATAAGATTTTCTACTTCAAATTTGCTCAA  
CCACCCGGCCGAGCCAAAAAGTTCCTTCCACGATGGGCTGGACCATTCGAGATCGT  
GGGAAACTCTCACCAGTGGCCTATAGAATAAGGACCTCCAAACCCAGGCAAGCAC  
CTGAATACAGGTGGGTCCATGGGAATCAAATAAAACCTTAA

> Loki-Cne consensus sequence Pol protein

LRFLGELHLTKNARRLYCSAVIGGCITADALLDTGSEISLMCAMLFEKVMRAMNTLGKP  
FQVETCNVGITSYTQHKSCITKRVLVDVTRDMTLIHPIYICTLDTEPFLVGGQDLLDRLAP  
LIDCNQGHLLWAQVENPKPFPSTEKQLVPTHLVTCSNEPVKHQEQPLPPAEPLFGVSASKT  
QTDNQSASFRSHESFLCTLTPSDNEPFNPRVTEGIHLEDVFPNAVLAALWLEKSAISRGL  
YLSRGEACLVEVRRCHLLSDDRPRRLKATGVCMLKVNIGSKHISHTFSIVEHPLTPVL  
IGADLLVRLGVQLDTCNQVLWARARTPPCSFLEKPEVMRSGQTIPQACQVACETDMLIP  
AYTTGVPVRLVILKQEMENPRVHFQPLPHFHELNLVVRGNPLLELNNRSTYLLVENPT  
AVPIPLKTAKPLGVLIDSSFHDFELSIPVIGELPSSLITTQGFDTDSASTFPSKMITVRRGEAL  
PVISLFGATLEAEGNLVVYSLEARSTKDSQVNLPEYPGFEDVNVQLEKADALSTEAEK  
VALRDLFYEFQTILSRDSNDCGVTGLHTVRIPTKPNAPPTFVRQYKIPLAAYGSIQEILNK  
LLEKNIIRECNSTYNSPIWPVLKPTGKWRLTIDYRALNKQVPLSRWPMIHLDDQELAKVK  
DARFFSTVDVANGFWTMKVDPADRYKLAFSFGNRQYXNRCPEFGYSNSPAEFNIFLHKA  
MSDATERGNLIYVDDILMRSRTFKEHLEEIXHVLGQLAAAGAKLALSKGQWCRKKVDY  
VGLTVGPNIEPQADRIRAIQDIAAPTNLSELRSFLGVCNYSRQFIEDYADMARPLTELLR  
KNTPFDLGEPQEQAQFQWMKQKLVASCLAYPDKDREFYLEASFSSHCLSAALRQKYDQ  
DMRVVAYASKPLSEVEIKFSDCEKALLSTVWAVEHFRSYGGQKVIHETCHQPVTFLNSQ  
RLREGRVSNRIATWMMALQGYDIEVRYGQNNRMALGQGLAGCNHCECDTPQPQPDIP  
TAVGTTLSAHRYYDENICKGLPRVYTDGCAFMHEHQLRAGVGVWWTGIDSILITIQQAA  
ALNQKQLVICSDSNYARLSFISHLPVWKTNGMKRNARNKEVKHSNIFLACEKLTENDMT  
IYWKVKVGHRTLGQDKDGNDEADRLARLGAESGTPWEFREDWAKPVENHTVCTITR  
QQVRANQNKLGNAKEMLCGRKPNDQDLCTMQDQDPTLHAIKELVCNGTSPGNQPS  
TGEPKELKSFRHSLPHLRIEKGLLVYSKDGHDPLRWVVPMDHRGIMLAHAHDSVGGH  
RGYKATLHTLQQVAYWPLMANDXRRGVTFPWSHIQIDWVGPVPRSARGNKYFLTVTC  
SFTKWVECLPAPNDTATTTAVLLLNHFVSRWGLPLSVDSDRGTHFTSNVMTALFEMLG  
VEVRFHISYHPQSSGQVERMNRVTVNMLRKYVDSHAKDWDVKLPLVLMAIRFTPQTST  
GVTPFEMMTGRQMTLPLHLIYQPEYVSVTTAYTAHQYVSDLKDHLRATFAWAQKLE  
ASVKGAKAYYDRKATHTEYEVGDKIFYFKFAQPPGRAKKFLPRWAGPFEIVGKLSVA  
YRIRTSKPRQAPEYRWVHGNQIKP\*

> Loki-Cne consensus sequence *env* gene

CTGAAGTTGTGCATAACAAATAGGGCCAAAAGACACATAACCTGTACACACTCCGT  
CATAATTTGGGTCTCTCTATTGCAGATGGAGATCTTCTGGGTAATCGGCTTCCTCCTG  
GGATCAACCATGGGCCAACCATCCAGTGTAAATAGAGACAGGACCTCCAACCGGCAC  
CGCTCTCCAAGACACACCTGGACTACTCATCACACTGTTANCTCCATACACAACG  
GATGTTCTGCTCCGACTCGATCCATGGGACGTGTACCGAAAACATATTAACCTACCGCC  
TCAAATAGGAGAAGGACGACAACAAGGCAGTCAGATCCGTGACACAGTGAACCATG  
CCAAACATACCACAACCCACATCCTTAAACAACCTCGAAAAGTATATGGTACTGAA  
CAGGATCTCGTCCGGAAGTAAACGCCCGAAAAGATTTTATAGGCGGACTCATAGCCTCT  
GTGGCCGCGAGTCGGATCACTGTTTTCCATAGGCCTCTCAGCGGCAAATGCTGTTAGT  
CTGAAAACAATTCAAAGCATGTACAAGAACTGGACTCTGAAATGCCAGAAATCCA

GCAAAGGCTCCTCATACAACAAAACTACTGAACATCCAGACAAAAACACTTCAAG  
GCACAGTGGTCACGGTTAACCTACACTCTGCCCTTATAAACAACACCATGCATGCAC  
TGGAACACTGACAGAAGTGGTAAAGAATGATCTAATGTACACGCAAGTTGTGAGA  
GATTTAATGCAGGATCTCATCCGAGAGGTTGGTGAATCGGTAAACAGCCTAGCTGA  
GGGAAGGATCCCTCCTTACTTAGTCCCCGTGGAAGTAGTAGAAAATGTGCTGAAATC  
CGCTGTCACTGATGCTCTGCAATCACCGCAAACCTCACCTGGCTTATAGCTTAGGTTAG  
TGCAATACCAATCTTTGTAGATCCCGATAACTTAGAAATCGGATTCATGTTAAATCT  
CCCAATCATTGAAAGAGCTAATGAGTATAGACTAAAATCAGTACTAAACGTTGGATT  
TTGGAAAGATAAAACCCACGTCCACTTAAAAACTCCGTCCATGTTGGCTTTC AACGA  
CGCCAACCCCCAGCTCTATTTGGTCCCTAACTTAGACTTATGCACCAAACTAAAGA  
AATCCACTGGGTCTGCCCCAGCAACCCATTCTTAGAGATGTAACAGACCGCCTCTG  
CGGACTTACAGAACAAAACCTGCCAAGCTAAAATGACTCTAAAAGATGCAGGAGTAG  
AAACAATGATAGAGCGCGCAGGTAATAAATGGCTAGTGAGTACACCAGCTACCGAA  
GCACTGCTGTCCTACGAACTACACGACACAGTCACTAGAATTCACCTTCCCAATCAA  
ACAATGTTGATTCAGTTCCTCAAGGCGCCGTGATCCATACTAGAAGTGTGGTAAAT  
GTACAACAGATGTCTGTGTCTCAATGTTTAGAAATACTGANNATAGTCTTACACCAT  
CTCAATGTTGAACGATACGACTCAGAAATTGAAATTCTAGACGTCTTCAAAGGATAT  
AACTTCAGTATTGATGTCGAAATTGGAAAACAACTCCTAGCAGCAGGCACTCAGCTA  
GTTAAATTCAGCCTCACACCATCTGAATTACTCTCTACCCACATTTCCATTATCGAC  
AAGACAATGCCTGGCCAAATACCCACACCATGTCTATTCCGATCATTGTTTTTATTTT  
TGGTTGGGTCATCACTACGATAATGACGTATAAGGCATACCAAAAGATAAAGGTGT  
TACAGAATAAGTTCTATCAACCATCCATTATTCTGCAGGACATTATATTTCCACA  
ACACTTTGTGCAAAGGACATTAAGGTTTTCCCTTACTGAATGTAGTGAAACCGTTCA  
GGGGGTTTTTCGGGACCTTTCTGACCTCCTTGTCGCAGTTCCTGTCCATTCATCACATT  
CTTTTCATTTGTCATATCCATTTTTTTTTGTCATATCCATCTATGA

> Loki-Cne consensus sequence Env protein

LKLCITNRAKRHITCTHSVIIWVSLQMEIFWVIGFLLGSTMGQPSSVIETGPPTGTALQD  
TPGLLITHCXLHTQRMFVRLDPWDVYRKHIKLPQIGEGROQGSQIRDTVNHAKHTTTTHI  
LKQLEKYMVTEQDLVGSKRPKRFLGGLIASVAAVGSLFSIGLSAANA VSLKTIQKHVQE  
LDSEMPEIQRLLIQKLLNIQTKTLQGTVVTVNLHSA LINNTMHALETLEVVKN DLM  
YTQVVRDLMQDLIREVGESVNSLAEGRI PPYLVPVELVENVLKSAVTDALQSPQTHLAY  
SLGSAIPIFVDPDNLEIGFMLNLP IIERANEYRLKSVLNVGFWKDKTHVHLKTPSMLAFN  
DANPQLYLVPNLDLCTKTKEIHWVCP SNPFLRDVTDRLCGLTEQNCQAKMTLKDAGVE  
TMIERAGNKWL VSTPATEALLSYELHDTVTR IHLPNQTM LISVPQGA VIHTRS VVNVQQ  
MSVSQCLEILXIVLHHLNVERYDSEIEILDVFKGYNFSIDVEIGKQLLAAGTQLVKFSLTP  
SELLSTPHFH YRQDNA WPNTHTMSIPIIVFIFGWVITTIMTYKAYQKIKVLQNKFYQPSIH  
YLQDIIFPQH FVQR TLKVSLTECSETVQGVFGTFLT SLSQFLSIHHILFICH IHHFFCH IHL\*

>Loki-Bpe consensus sequence

ATGGCCGACCCAACCGCAGCTGACGCCAGCTGTCAGACGACCTGCTAAGCCAGGC  
CGAAACTGCCCTTTTCCATGCAACCCAACAGTAGTACCAGGATACTGGGAAAAGA  
GAAAACCTGCAACCATCAAAGAACATGAAATTGAGCTTAAAACCTTAGCAAGTAGT  
GTTCCAAAAGCAGATGCGGAGGACGACGAGTGGACCATTTGGCTGAGCCATATGTC  
CGTCACCTACCACCTCCTTAGTGTAAGGAACAAAACATTAATCCTCCGCCTTAAAAG  
CTCCGCAGATGCCAGAAAAGCTGAGTTAAGTGCCCTACAGGACCAAATTGCCAGAT  
TGAGGACAGAACTGGAGCAGGCCGGAGTGACCAACCTCTGTGGACTTTC AACGACT  
AAAATTTGGGCACAGGTAAGGAAACCCCTCCAATGCCAGCCCCACCAGCACTAG



CCCAGTGCTGCACGCTGGAGATTACATCTCCAGAGCTCGACGCCAAAGGCGACCTTC  
GAGGGACAGCTTCTTATGTGAATTTACTTCTTTTGGAGGAATCCCCAAGTCCGCGGCT  
AGTGGACGGCGTGACTCTTGAGACCACCAGGGTGGATGACGCAAGACTAGCCATAT  
GGACGGACAGGTCAGCTATTAGCCTTGAAGTGTACAAGATGCTTAACGGTATGAAA  
CAAACATACCCTTCATGCCTAAAACGTCACGGTTCACACAGATCACAAGTCTGGG  
AATGTCTTTACAGCTGTTGGCTTCTGTTCACTGTCAGTGACTTTAAAAAACAGAAAA  
CTAAACCACGTTTTTCGTGGTAGTGCCTAACCTATCACACCCGTTGTACGTCGGGGGG  
GACATTCTTGTCCGATTGGACGCCCAAATAGACACCATAAACAATGTCATATGGTCT  
CTCATAGGGGTGTCTGAAAATGCCTGCACGCCATCCCAGGAAAACCTGAAGTCTGG  
GCAGACCATTCCCGAAGTGTGCCAGGTCACCAACCAGTGCCCGGTGGTCATCCCACC  
CAATACCGCTACGCCCTTAACCGTGGTTGCCTGCCCTGGACAACAGACCACCAACAA  
CCAAGCCTTCTTCCAACCTTCCCACCTGTTTTTCAGAACTTGGGCTCTCCGTCGAGGCC  
ATGCCCTTGCTCATGGTCAAGAACCGCATGGCATGTCTTGTGGTGGTAAACAACACT  
ACCCAAGAAGTCCATATTCCCCGAGCTACTCCTTTAGGCTGGTTGATTGATACAAAG  
TTTCATGACTTTGAACTCAAACCTTCCCGTGATGGGAAAACCTGCCAGCATCTTTCCTTG  
AAGACCCCGACAGGAAGGTGTTCTATACAAAACCTTGAGGGCTATCGCCCTGCAC  
TCAATGCTTGTCCGGACGTAGAGGACATCTGTGCGGTAGACCTGACGGACCAGAA  
AGAAATGGTCATTCAAACGGTTTTCCGTCATTAGTCTTGAGCCCGGAAAACCTGATGA  
AACGCCAGACGCTACAAGCCCGACTCCACAAGCTGACTCCTCGGGTTCTAACCCCTAC  
CGTTGAGGAGCAATTGAACCAGGTGATAGCTGAAGCAGATGGGCTTAACAGCGACG  
ATCAGCGTGAAAAACTTCGAGAAATACTGATGAAATATAAGGCCTTTTTCTCCACAG  
GGCCTACGGACTGCGGCCTTACAAACATTCACACGGTCCGTATTCAGACCGTGCCGA  
ACGCACCCCAACTTACGTACGCCAATACAAAATACCCCTGGCGTCATACGAACCG  
ATTCAAGAAATAATCGATGATCTGCTGACGAAAGGCGTTATACGACCTTGCAACAG  
CACATATTCAGCGCCGATATGGCCCGTGTGAAAGCCCAACGGTAAGTGGAGACTGA  
CGGTCGACTACCGACAGCTAAACACTAGAGTGCCCTGTCTCGATGGCCTATGACCC  
AACTTGGACAGGACCTGCCAAAGGTGAGAGACGCCAAGTACTTCTCCACGCTTGAT  
ATCGCGTCTGGTTTTCTGGACTATACCAGTACACCCTGACGACCAACACAAACTCGCC  
TTCAGCTTCGCCAATCGTCAATACACCTTCACACGCTGTCCTTTTGGACTAGCCAACT  
CACCGGCTGAGTTCAACATCTTTTTGAACAAAGCATGCCCAATGCAGCCAGTCGTG  
GAACGCTCATCTACGTGGACGATATCTTGATCAGAACTACGACATTGGACGATCACT  
TGAAAGAAATCGACCATGTGTTGGACCAACTAACCTCCGCAGGAGCAAAGATTTCT  
CTGTCAAATGCCAGTGGTGAAGACAAAGGTAAACTATGTAGGCCTCCTAGTNCG  
GAGCAGTAGAATTCAAGGAATCACAACCTCAAAGTGCCTGCAAATGTGTCTGAAC  
TACGCAGCTTCTCGGAGTTTGTAACTCAAGACAATTTGTGCAAACTACGCCG  
AGTTAGCTAAACCGCTAACCGACCTCCTCAAGAAAGACGAAACTTTCTCATGGGGC  
CAAAGCCAAGACAATGCCATGAAAGCCCTGGTAGACCAGCTCTGCCAGGCCCCATG  
CTTGGCGTATCCGGACCCCAACAAACCCTTTCACCTCGAGGTAGGCTTCTCAGAGCA  
AAGCCTCAGCGCAGGTCTCTACCAAATTCATGATACCGACAAACGAGTCATTGCTTA  
TGCCAGCAAGCCGCTGACAGACCCCGAGAGGAAATTCTCGGATTGTGAGAAAGCAC  
TCCTAGGCACAGTTTGGGCGGTGAAACATTTCTCAAACCTACGTAGGTGGACAAAAA  
GTGGTGGTGAATACCAACCACCAGCCAGTAACATTCCTAGCCAGTCAGAGACTCAG  
AGACGGGGTGGTCACTAACGCCAGAGTGGCATCTTGGCTCATGGCACTCCAAAGCTT  
TGACATAGAAGTGCCTACGCACAGAACCACAAGTCCCACCTAGGAATGGAAGCTG  
CCGCATGTCAAAGCTGCGAAAAGGACATACCGGCAGGAACTGCACCATGCGCAGAA  
CCCCTACCAGTGTGCAACCAACACCATTACTTTGACCCAAACACATGCCAGGACATG

CCAACCGTCTACGTTGATGGTTGCTCCTTTACCATGAGGCTACAGTCCGCGCCGGA  
GCTGGAACCGTATGGCTCAACAACGACCCATGTGAGCCCGAAAAATTTCAACTAGG  
CGCACAAACCTCACAGTACGCTGAAATTTCCGCAGTGCTGATCGCACTGAACCAAG  
CAGCTGCTCATGACGTAGACACGTTTCGTCATTTGCACTGACTCGAACTATGCCCCGTC  
TTAGCTTTTCATGCCACCTCCCATTATGGAAAAGCAACGGCTTCCCTCACAGCTGCGA  
AAAAGTCTGTTAAACATAAGGAACTGTTTATAGCATGTGACCGACTTGTGCAAACCA  
AAAACATGAAAGTTTACTGGAAAAGGTCCGAGGCCACTCACGTGAACCAGGACCT  
GACAAAGAACTGAATGACAGGGCAGACGCCCTGGCTAAGCAAGGCGCTTTAGACGG  
TACCCCTGGCGTTTCCAACCAAACCGCCAGACGTGATACCCCTTCCCACCCAACC  
CACCTTTTCTGTCTGTGCCGTCACCTCGCTCCCGCGCAGTACCTACTTACGACCGCCGA  
GACACAGTCTCCGCCTCCGTAAACCTGGCTCTCACTGACTCTGACTTAACGTCACTT  
CAGTCTTCCGACGCCGCTATTAGCCGCATGGTCACCTTCCCTGTCCGACCCCTTGCTCC  
ACCCAATCTCGGCCGATGATCTGGCCTCCGACCAGGCCCTCAATCTTTTGTGGCGCG  
TCCGCGACAAACTCCTCCTACGTATGGCCTGTTGCTATACGCCTCTGACTCCCTCAC  
TTCACCCGCGTTCGTAGTGCCTCAGAGCCTCAGGGGGGTTATGCTCACACACGCACA  
TGACACACCAGTCGCAGGCCACAGGGGGGTACAAGCCACATAACCAGGCCCTACAGC  
AGGTGGCCTATTGGCCACACATGAGAAAAGATGTACAAGAATACACAAAAGGGTGC  
CTGGTTTGCTGTCAGTTTCAGCCCTCTAGACCGCTCCACCGTGCACCTCTGCACAAA  
AGAGGCATTACCTTCCCCTGGTCAGACTTACAAATAGACTGGGTCCGACTGCTAACG  
AAATCCGCAAGAGGAAACAAGTACATCTTGATGGTCACCTGTGCTTTCACCAAATGG  
GTAGAGGGCTTACCAGCCCCGAATGACACGGCTCAAACCACGGCCTTCCCTGCTCATG  
AACCATGTGTTCTCTCGCTTCGGCTTGCCGTGCAAAAATCGACTCTGATCAAGGTACG  
CACTTACAGCCGCAGTAATGTCCGAATTGTGGCAGACCCTTGGCGTAAAAGCTACC  
TTCCACATCAGTCACCACCCAATGGCCTCTGGGCAGGTGGAAAGAACCAACCGGAC  
TGTGATTAACATACTGAAAAAGTATGTGTCAGCTAATCAGAGAGATTGGGACGTGA  
AACTTCCCCTAGTCCTCATGGCTATCAGAGCCACCCCCAACAAATCAACCGGGATTT  
CCCCTTTGAGATGATGACAGGAAGACAAATGACTCTGCCCTGCATCTATTGTACC  
AGCCAGGTGAAGCCAGCATTGCCACAGCTTACACCACACACCAGTACATGACAGAC  
TTGCAGAGACATTTAAAAGCAACCTTCGCATTTGCCCAAGAGAACTAGAGAAAAG  
TGCAGAAGGACGTAAGGCCTACTATGACCAGAAAGCGTCACACGAGGAACTCCAAG  
TAGGCGACAAGGTCTGGTACTATATCTTTGCACAACCTGCAGGACAATCCCAGGAAC  
GCACGGCCAGGCTAATCCGGAAGTTCCTACCCAGACGGTCCGGGGCCGTACGAGATT  
GTGAACAACTATCCTCGGTGGTATATCAAATAAAGATTACCAAAGGACACAAAGA  
GCCAACCCTCAAGTGGGTGCACCGAAACCAGATCAAACCTCACAAAAACCCCATGG  
GACAAGTCGGGAACACTGAGGCGCCCCATTAAGACACTTGAGAGTCTAAACCCACA  
TTAGGATAGGGACCTTTACTAACACTCGCAATATCCCTAACCCCTAAATTAACCAACT  
AATGTTAACCTCTAACTAATCAATAAAAATTACTCAACAAAGTGAGACCAAAGTTCT  
AAAGATACTCGTTTGTGTGTTGACAGGAACATGGAACCGCGTTTCCCTGATCCTACTG  
GTCTGCGCGTCCAGCCTAGTAAAAACAGAAGTTGTAGAGCCCGGACCGGCCTCAGG  
AATCGTCTTAAGGACCAACCTGGATTACTCATAACGAACGTCCGACTCCCACTCA  
AAAGGTCGTCGTGAGACTCAATCCCCGCGACGTATGCAGGAAAAACGTCCCTATCA  
CGGCGAGCCTCACGGGTGGGCTGGCACTCAGTGGAACTAGAGGCCATCCAACAC  
GCGGAATCAGACATAACACATATGTTAGAGCAACTCGAGAAATTCACAACAACCA  
GGCAGAAATTAGAGGTATGCCGCACCCACGCTCTAAACGCTTTATAGGAGGCATCTT  
AGCCGCAGCTTCCACCGTAGGAACCATATTAACCTCGGGTTAACACGATAAACAC  
GGTCAGCATAGCCTCCCTCAAGCGCCACGTGAGCGAATTACAAGGAGAATTACCGG

TGATCAAACCCAGCTCGATCAACAGCAGAAAGATCTAGTGACTTTCGGTGAAACC  
CTCCGCGGTACAGTGCTGGTAGTAAACACCCATAGCATAGCCCTAAATAAAACAAT  
ACAGGCTGTCAACTCCCTCATGGCCGTAGTTCACGTGGATTATGCGCACCTACAGTT  
AGTCACCATGCTGTANAACGACATGCTTCGCGACATAGGGTCCTCGGTAGATAGCCT  
AGCCATGGGTCGAATCCCACCATACTTGGTGCCCCCTGACCCTGGTACAAGACTTACT  
ATCCACTGCGACCCGCGACATAGTCACGCCTCTCCAGGCCACCTAGCATAACACGCT  
CGGAAGCGCCATCCCTATCCTCGTGAACCCCGCAGGCCGCGAAATCGCTTTCCTTAAT  
TAACCTGCCAATCGTAGCTTCCGATAACATTTACCGCCTTAAAGACATAAATGTTCGG  
GTCGTGGCAGGGAGAAATGCACGTTAGAATTCAAACCCCAAGCCTGGTTCGCATATC  
ACGACAGTAACCCAGACCTGTACTTGACACCAAACCTACGTATGTGCTCTCTTATGA  
AAGACATTCATTATCTCTGCCCCAGCAAACCTTTTGTTCAGAGATAGCACCGACGGCA  
TCTGCGGGCTCAAACCCATGACACCGGGTAACAGATGCCCCGACCACAATCACGGCT  
CGTGGGAAAGTCCTAGAAACTCAGGCCGAAATCGTGGGGGGGGCGCTGGCTAATAAA  
CACTCNGGCAACCCTCACGTACGACAAACACGACACCTCGTCCAGAATCATACTGC  
CAGAACAGACAATCTGGGTGGATATCCCAACTAACGCCATCCTCCATATTGGGGAC  
ATCGCGCTATTTCCGCTCAGTCCGAACCAATATGAGGAAAACCTTTGAAGTCCCAGAG  
TTCTTTGCGGAAAGAACTCTGAAACTCCAACCTGCAACGATTAATCAAGTGTCTAC  
GAAGGCACCCAAATAATCGATATCACACCCGTCGACAACCTCCTGACAGAAATTAC  
CAATCGACCTTAACGCCGATCCAACCCGTGTCTTACTCTTGGTTCAGGCCCTGACTC  
ACTCCTTGCCATCGCGATAGGAATTGGGTATATTTGCGCTATAATTGCCACCCTTATC  
TTAAACAAAAGATTGAACAGAATTATAGGGCAATTCAGGCAGCACAGAAGAAGTAG  
GGCAGTCAAACGCCAGTTGACAACAGAGGGCACAAACCGAATCGACGAACGCGTGT  
CGTACTCAGTCCGGGACGCAGACTATGAGGATCTCCAAACAACCAATGAAGGGTTA  
GTTGTGATCCCGGCCCCAGGCGTCTAGCAGTGCACCACTAACCTCGAGAACCACGC  
GCTGTTCGGCATCTACCAGTGCACGTTCTCCCGAAACCAAATTCACACTCTATGCTC  
AGATTCTGACTACCGAAGGAAGTGAATCATAGGCAGATCACTACATCTTATAATTTT  
TTTACCTATTTCTTTTTCTTGTATATACACTTATAAGAAGTTTTGTTATATCCTTAA  
AACGTCCCTAATTTCAATCCAGGGAATCCATTACCGCAAACAAAAACAACAACCAA  
AAAAAAAACAATTTTTTTTTATTATGTTTGCACCAAACCTTTGTTTCGTCACCTAC  
ATATTTGGATAGTGCATAAAA

> Loki-Bpe consensus sequence *pol* gene

ATGGCCGACCCAACCGCAGCTGACGCCAGCTGTCAGACGACCTGCTAAGCCAGGC  
CGAAACTGCCCTTTTCCATGCAACCCAACAGTAGTACCAGGATACTGGGAAAAGA  
GAAAACCTGCAACCATCAAAGAACATGAAATTGAGCTTAAAACCTTAGCAAGTAGT  
GTTCCAAAAGCAGATGCGGAGGACGACGAGTGGACCATTTGGCTGAGCCATATGTC  
CGTCACCTACCACCTCCTTAGTGTAAGGAACAAAACATTAATCCTCCGCCTTAAAAG  
CTCCGACAGATGCCAGAAAAGCTGAGTTAAGTGCCCTACAGGACCAAATTGCCAGAT  
TGAGGACAGAACTGGAGCAGGCCGGAGTGACCAACCTCTGTGGACTTTCAACGACT  
AAAAATTTGGGCACAGGTAAGGAAACCCCTCCAATGCCAGCCCCACCAGCACTAG  
CCAGTGCTGCACGCTGGAGATTACATCTCCAGAGCTCGACGCCAAAGGCGACCTTC  
GAGGGACAGCTTCTTATGTGAATTTACTTCTTTTGGAGGAATCCCCAAGTCCGCGGCT  
AGTGGACGGCGTGACTCTTGAGACCACCAGGGTGGATGACGCAAGACTAGCCATAT  
GGACGGACAGGTCAGCTATTAGCCTTGAAGTGTACAAGATGCTTAACGGTATGAAA  
CAAAACATAACCTTCATGCCTAAAACGTCACGGTTCCCCACAGATCACAAGTCTGGG  
AATGTCTTTACAGCTGTTGGCTTCTGTTCACTGTCAGTGACTTTAAAAACAGAAAA  
CTAAACCACGTTTTTCGTGGTAGTGCCTAACCTATCACACCCGTTGTACGTCGGGGGG

GACATTCTTGTCCGATTGGACGCCCAAATAGACACCATAAACAATGTCATATGGTCT  
CTCATAGGGGTGTCTGAAAATGCCTGCACGCCATCCCAGGAAAACCTGAAGTCTGG  
GCAGACCATTCCCGAAGTGTGCCAGGTACCAACCAGTGCCCGGTGGTCATCCCACC  
CAATACCGCTACGCCCTTAACCGTGGTTGCCTGCCCTGGACAACAGACCACCAACAA  
CCAAGCCTTCTTCCAACCTTCCCACCTGTTTTTCAGAACTTGGGCTCTCCGTCGAGGCC  
ATGCCCTTGCTCATGGTCAAGAACCGCATGGCATGTCTTGTGGTGGTAAACAACACT  
ACCCAAGAAGTCCATATTCCCCGAGCTACTCCTTTAGGCTGGTTGATTGATACAAAG  
TTTCATGACTTTGAACTCAAACCTTCCCGTGATGGGAAAACCTGCCAGCATCTTTCCTTG  
AAGACCCCGACAGGAAGGTGTTCTATACAAAACCTTGAGGGCTATCGCCCTGCAC  
TCAATGCTTGTCCGGACGTAGAGGACATCTGTCGCGTAGACCTGACGGACCAGAA  
AGAAATGGTCATTCAAACGGTTTCCGTCATTAGTCTTGAGCCCGGAAAACCTGATGA  
AACGCCAGACGCTACAAGCCCGACTCCACAAGCTGACTCCTCGGGTTCTAACCCCTAC  
CGTTGAGGAGCAATTGAACCAGGTGATAGCTGAAGCAGATGGGCTTAACAGCGACG  
ATCAGCGTGAAAAACTTCGAGAAATACTGATGAAATATAAGGCCTTTTTCTCCACAG  
GGCCTACGGACTGCGGCCTTACAAACATTCACACGGTCCGTATTCAGACCGTGCCGA  
ACGCACCCCAACTTACGTACGCCAATACAAAATACCCCTGGCGTCATACGAACCG  
ATTCAAGAAATAATCGATGATCTGCTGACGAAAGGCGTTATACGACCTTGCAACAG  
CACATATTCAGCGCCGATATGGCCCGTGTGAAAGCCCAACGGTAAGTGGAGACTGA  
CGGTCGACTACCGACAGCTAAACACTAGAGTGCCCTGTCTCGATGGCCTATGACCC  
AACTTGGACAGGACCTGCCAAAGGTGAGAGACGCCAAGTACTTCTCCACGCTTGAT  
ATCGCGTCTGGTTTCTGGACTATACCAGTACACCCTGACGACCAACACAAACTCGCC  
TTCAGCTTCGCCAATCGTCAATACACCTTCACACGCTGTCCTTTTGGACTAGCCAACT  
CACCGGCTGAGTTCAACATCTTTTTGAACAAAGCATGCCCAATGCAGCCAGTCGTG  
GAACGCTCATCTACGTGGACGATATCTTGATCAGAACTACGACATTGGACGATCACT  
TGAAAGAAATCGACCATGTGTTGGACCAACTAACCTCCGCAGGAGCAAAGATTCT  
CTGTCAAATGCCAGTGGTGAAGACAAAGGTAAACTATGTAGGCCTCCTAGTNCG  
GAGCAGTAGAATTCAAGGAATCACAAACCTCAAAGTGCCTGCAAATGTGTCTGAAC  
TACGCAGCTTCTCGGAGTTTGTAACTCAAGACAATTTGTGCAACACTACGCCG  
AGTTAGCTAAACCGCTAACCGACCTCCTCAAGAAAGACGAAACTTCTCATGGGGC  
CAAAGCCAAGACAATGCCATGAAAGCCCTGGTAGACCAGCTCTGCCAGGCCCCATG  
CTTGGCGTATCCGGACCCCAACAAACCTTTCACCTCGAGGTAGGCTTCTCAGAGCA  
AAGCCTCAGCGCAGGTCTCTACCAAATTCATGATACCGACAAACGAGTCATTGCTTA  
TGCCAGCAAGCCGCTGACAGACCCCGAGAGGAAATTCTCGGATTGTGAGAAAGCAC  
TCCTAGGCACAGTTTGGGCGGTGAAACATTTCTCAAACACTACGTAGGTGGACAAAAA  
GTGGTGGTGAATACCAACCACCAGCCAGTAACATTCCTAGCCAGTCAGAGACTCAG  
AGACGGGGTGGTCACTAACGCCAGAGTGGCATCTTGGCTCATGGCACTCCAAGCTT  
TGACATAGAAGTGCCTACGCACAGAACCACAAGTCCCACCTAGGAATGGAACCTGG  
CCGCATGTCAAAGCTGCGAAAAGGACATACCGGCAGGAACTGCACCATGCGCAGAA  
CCCCTACCAGTGTGCAACCAACACCATTACTTTGACCCAAACACATGCCAGGACATG  
CCAACCGTCTACGTTGATGGTTGCTCCTTTCACCATGAGGCTACAGTCCGCGCCGGA  
GCTGGAACCGTATGGCTCAACAACGACCCATGTGAGCCCGAAAAATTTCAACTAGG  
CGCACAAACCTCACAGTACGCTGAAATTTCCGCAGTGCTGATCGCACTGAACCAAG  
CAGCTGCTCATGACGTAGACACGTTCTGTCATTTGCACTGACTCGAACTATGCCCGTC  
TTAGCTTTTCATGCCACCTCCCATTATGGAAAAGCAACGGCTTCTCACAGCTGCGA  
AAAAGTCTGTAAACATAAGGAACTGTTTATAGCATGTGACCGACTTGTGCAAAACCA  
AAAACATGAAAGTTTACTGGAAAAGGTCCGAGGCCACTCACGTGAACCAGGACCT

GACAAAGAACTGAATGACAGGGCAGACGCCCTGGCTAAGCAAGGCGCTTTAGACGG  
TACCCCTGGCGTTTCCAACCAAAACCGCCAGACGTGATACCCCTTCCCACCCAACC  
CACCCTTTCTGTCTGTGCCGTCACTCGCTCCCGCGCAGTACCTACTTACGACCGCCGA  
GACACAGTCTCCGCCTCCGTAAACCTGGCTCTCACTGACTCTGACTTAACGTCACCT  
CAGTCTTCCGACGCCGCTATTAGCCGCATGGTCACCTTCCCTGTCCGACCCCTTGCTCC  
ACCCAATCTCGGCCGATGATCTGGCCTCCGACCAGGCCCTCAATCTTTTGTGGCGCG  
TCCGCGACAACTCCTCCTACGTGATGGCCTGTTGCTATACGCCTCTGACTCCCTCAC  
TTCACCCGCGTTCGTTAGTGCCTCAGAGCCTCAGGGGGGTTATGCTCACACACGCACA  
TGACACACCAGTCGCAGGCCACAGGGGGGTACAAGCCACATAACCAGGCCCTACAGC  
AGGTGGCCTATTGGCCACACATGAGAAAAGATGTACAAGAATACACAAAAGGGTGC  
CTGGTTTGTGCTGTCAGTTTCAGCCCTCTAGACCGCTCCACCGTGCACCTCTGCACAAA  
AGAGGCATTACCTTCCCCTGGTCAGACTTACAAATAGACTGGGTCCGACTGCTAACG  
AAATCCGCAAGAGGAAACAAGTACATCTTGATGGTCACCTGTGCTTTCACCAAATGG  
GTAGAGGGCTTACCAGCCCCGAATGACACGGCTCAAACCACGGCCTTCCCTGCTCATG  
AACCATGTGTTCTCTCGCTTCGGCTTGCCGTGCAAAAATCGACTCTGATCAAGGTACG  
CACTTACAGCCGCGAGTAATGTCCGAATTGTGGCAGACCCTTGGCGTAAAAGCTACC  
TTCCACATCAGTCACCACCAATGGCCTCTGGGCAGGTGGAAAGAACCAACCGGAC  
TGTGATTAACATACTGAAAAAGTATGTGTCAGCTAATCAGAGAGATTGGGACGTGA  
AACTTCCCCTAGTCCTCATGGCTATCAGAGCCACCCCCAACAAATCAACCGGGATTT  
CCCCCTTTGAGATGATGACAGGAAGACAAATGACTCTGCCCTGCATCTATTGTACC  
AGCCAGGTGAAGCCAGCATTGCCACAGCTTACACCACACACCAGTACATGACAGAC  
TTGCAGAGACATTTAAAAGCAACCTTCGCATTTGCCCAAGAGAACTAGAGAAAAG  
TGCAGAAGGACGTAAGGCCTACTATGACCAGAAAGCGTCACACGAGGAACTCCAAG  
TAGGCGACAAGGTCTGGTACTATATCTTTGCACAACCTGCAGGACAATCCCAGGAAC  
GCACGGCCAGGCTAATCCGGAAGTTCCTACCCAGACGGTCGGGGCCGTACGAGATT  
GTGAACAACTATCCTCGGTGGTATATCAAATAAAGATTACCAAAGGACACAAAGA  
GCCAACCTCAAGTGGGTGCACCGAAACCAGATCAAACCTCACAAAACCCCATGG  
GACAAGTCGGGAACACTGAGGCGCCCCATTAA

> Loki-Bpe consensus sequence Pol protein

MADPTAADAQLSDDLSSQAETALFHATQPVVPGYWEKRKPATIKEHEIELKTLASSVPK  
ADAEDDEWTIWLHMSVTYHLLSVRNKTLILRLKSSADARKAELSALQDQIARLRTELE  
QAGVTNLCGLSTTKNLGTGKETPPNASPTSTSPVLHAGDYISRARRQRRPSRDSFLCEFT  
SFEESPSRLVDGVTLETTRVDDARLAIWTDRAISLELYKMLNGMKQNIPMPKTSRFP  
TDHKSQNVFTAVGFCSLSVTLKNRKLNHFVVPVNL SHPLYVGGDILVRLDAQIDTINN  
VIWSLIGVSENACTPSQENLKSGQTIPEVCQVTNQCPVIPPNTATPLTVVACPGQQTIN  
NQAFFQPShLFSELGLSVEAMPLLMVKNRMACLVVVNNTTQEVHIPRATPLGWLIDTKF  
HDFELKLPVMGKLPA SFLEDPDRKVFYTKPLRAIALHSM LVPDVEDICRVDLTDQKEMV  
IQTVSVISLEPGKPD ETPDATSPTPQADSSGSNPTVEEQLNQVIAEADGLNSDDQREKLRE  
ILMKYKAFFSTGPTDCGLTNIHTVRIQTPVNPAPPTYVRQYKIPLASYEPIQEIIDLLTKGV  
IRPCNSTYSAPIWPVLKPNGKWRLTVDYRQLNTRVPLSRWPMTQLGQDLPKVRDAKYF  
STLDIASGFWTIPVHPDDQHKLAFS FANRQYTFTRCPFLANSPAEFNIFLNKACPNAAS  
RGTLIYVDDILIRTTTLDHDLKEIDHVL DQLTSAGAKISLSKCQWCKTKVNYVGLLXRSS  
RIQGITNLKVPANVSELRSFLGVCNYSRQFVEHYAELAKPLTDLLKKDETFSWGQSQDN  
AMKALVDQLCQAPCLAYDPNKP FHFLEVGFSEQSL SAGLYQIHDTDKRVIAYASKPLTD  
PERKFS DCEKALLGTVWAVKHFSNYVGGQKVVVNTNHQPVTFLASQRLRDGVVTNAR  
VASWLMALQSF DIEVRYAQNHKSHLGMELAA CQSCEKDIPAGTAPCAEPLPVS NQHYY

FDPNTCQDMPTVYVDGCSFHHEATVRAGAGTVWLNNDPCEPEKFQLGAQTSQYAEISA  
VLIALNQAAAHVDVTFVICTDSNYARLSFSCHLPLWKSNGFLTAAKKSVKHKELFIACD  
RLVETKNMKVYWKKVRGHSREPGDKELNDRADALAKQGALDGTWPWFQPKPPDVIP  
LPTQPTLSVCAVTRSRAVPTYDRRDTVSASVNLALTDSDLTSLQSSDAAISRMVTFSDP  
LLHPISADDLASDQALNLLWRVRDKLLLRHGLLLYASDSLTPAFVVPQSLRGVMLTHA  
HDTPVAGHRGVQATYQALQQVAYWPHMRKDVQEYTKGCLVCCQFQPSRPLHRAPLH  
KRGITFPWSDLQIDWVGLLTKSARGNKYILMVTCAFTKWVEGLPAPNDTAQTTAFLLM  
NHVFSRFLPCKIDSQGTHFTAAMSELWQTLGVKATFHISHHPMASGQVERTNRTVI  
NILKKYVSANQRDWDVKLPLVLMAIRATPNKSTGISPFEMMTGRQMTLPLHLLYQPGE  
ASIATAYTTHQYMTDLQRHLKATFAFAQEKLEKSAEGRKAYYDQKASHEELQVGDKV  
WYYIFAQPAGSQERTARLIRKFLPRRSGPYEIVNKLSSVVYQIKITKGHKEPTLKWVHR  
NQIKPHKNPMGQVGNTEAPH\*

> Loki-Bpe consensus sequence *env* gene

TTGTGTGTTGACAGGAACATGGAACCGCGTTCCTGATCCTACTGGTCTGCGCGTCC  
AGCCTAGTAAAAACAGAAGTTGTAGAGCCCGGACCGGCCTCAGGAATCGTCCTTAA  
GGACCAACCTGGATTACTCATAACGAACGTCCGACTCCACACTCAAAGGTCGTCGT  
GAGACTCAATCCCCGCGACGTATGCAGGAAAAACGTCCCTATCACGGCGAGCCTCA  
CGGGTTGGGCTGGCACTCAGTGGAACCTAGAGGCCATCCAACACGCGGAATCAGAC  
ATAACACATATGTTAGAGCAACTCGAGAAATTCACAACAACCCAGGCAGAAATTAG  
AGGTATGCCGCACCCACGCTCTAAACGCTTTATAGGAGGCATCTTAGCCGCAGCTTC  
CACCGTAGGAACCATATTTAACCTCGGGTTAACACGATAAACACGGTCAGCATAG  
CCTCCCTCAAGCGCCACGTCAGCGAATTACAAGGAGAATTACCGGTGATCAAACC  
CAGCTCGATCAACAGCAGAAAGATCTAGTGACTTTCGGTGAAACCCTCCGCGGTAC  
AGTGCTGGTAGTAAACACCCATAGCATAGCCCTAAATAAAACAATACAGGCTGTCA  
ACTCCCTCATGGCCGTAGTTCACGTGGATTATGCGCACCTACAGTTAGTCACCATGC  
TGTANAACGACATGCTTCGCGACATAGGGTCCCTCGGTAGATAGCCTAGCCATGGGTC  
GAATCCCACCATACTTGGTGCCCCTGACCCTGGTACAAGACTTACTATCCACTGCGA  
CCC GCGACATAGTCACGCCTCTCCAGGCCACCTAGCATAACGCTCGGAAGCGCC  
ATCCCTATCCTCGTGAACCCCGCAGGCCGCGAAATCGCTTTCTTAATTAACCTGCCA  
ATCGTAGCTTCCGATAACATTTACCGCCTTAAAGACATAAATGTCGGGTCGTGGCAG  
GGAGAAATGCACGTTAGAATTCAAACCCCAAGCCTGGTTCGCATATCACGACAGTAA  
CCCAGACCTGTACTTGACACCAAACCTACGTATGTGCTCTCTTATGAAAGACATTCA  
TTATCTCTGCCCCAGCAAACCTTTTGTGAGAGATAGCACCGACGGCATCTGCGGGCT  
CAAACCCATGACACCGGGTAACAGATGCCCGACCACAATCACGGCTCGTGGGAAAG  
TCCTAGAAACTCAGGCCGAAATCGTGGGGGGGCGCTGGCTAATAAACACTCNGGCA  
ACCCTCACGTACGACAAACACGACACCTCGTCCAGAATCATACTGCCAGAACAGAC  
AATCTGGGTGGATATCCCAACTAACGCCATCCTCCATATTGGGGACATCGCGCTATT  
TCCGCTCAGTCCGAACCAATATGAGGAAAACTTTGAAGTCCAGAGTTCTTTGCGGA  
AGA ACTCTGAAACTCCAACCTGCAACGATTAATCAAGTGTCTTACGAAGGCACCC  
AAATAATCGATATCACACCCGTCGACAACCTCCTGACAGAAATTACCAATCGACCTC  
TAACGCCGATCCAACCCGTGTCTTACTCTTGGTTCAGGCCCTGACTCACTCCTTGCCAT  
CGCGATAGGAATTGGGTATATTTGCGCTATAATTGCCACCCTTATCTTAAACAAAAG  
ATTGAACAGAATTATAGGGCAATTCAGGCAGCACAGAAGAACTAGGGCAGTCAAAC  
GCCAGTTGACAACAGAGGGCACAAACCGAATCGACGAACGCGTGTCTACTCAGTC  
CGGGACGCAGACTATGAGGATCTCAAACAACCAATGAAGGGTTAGTTGTGATCCC  
GCCCCAGGCGTCTAG

> Loki-Bpe consensus sequence Env protein

LCVDRNMEPRFLILLVCASSLVKTEVVEPGPASGIVLKDQPGLLITNVRLHTQKVVVRLN  
PRDVCRKNVPITASLTGWAGTQWNLEAIQHAESDITHMLEQLEKFTTTQAEIRGMPHPR  
SKRFIGGILAAASTVGTIFNLGLTTINTVSIASLKRHVSELQGELPVIKTQLDQQKDLVTF  
GETLRGTVLVVNTHSIALNKTIQAVNSLMAVVHVDY AHLQLVTMLXNDMLRDIGSSVD  
SLAMGRIPPYLVPLTLVQDLLSTATRDIVTPLQAHLAYTLGSAIPILVNPAGREIAFLINLPI  
VASDNIYRLKDINVGSWQGEMHVRIQTPSLVAYHDSNPDLYLTPNLRMCSLMKDIHYL  
CPSKPFVRDSTDGICGLKPMTPGNRCPTTITARGKVLETQAEIVGGRWLINTXATLTYDK  
HDTSSRIILPEQTIWVDIPTNAILHIGDIALFPLSPNQYEENFEVPEFFAERTLKLQPATINQ  
VSYEGTQIIDITPVDNLLTEITNRPLTPIQPVSYSWSGPDSLLAIAIGIGYICAIATLILNKRL  
NRIIGQFRQHRRTRAVKRQLTTEGTNRIDERVSYSVRDADYEDLQTTNEGLVVIPAGV\*

>Loki-Sme consensus sequence

TCATAGACTATGTTACGAATAATTCCTTATCTATCTAAAGTCACAAAAGGGCCTCCA  
CTGGAGTCTTCGAGTCTGCTCACACTCACCATCTGTGTTGACTTAAATCAACATTTTT  
ATGACTCTCTACCCTGTTTTCCGACACGGCAATCTGTCACAGATGCTCACCCTTTCC  
ATCTTAAAGAACCTTCTCACCTTGTGGATTTTTAAAGGACAACATCATCAAAGACTCT  
AATACACAATCCCCGCTCTGAACCCTGGATGAAACCAGTTCCTCCTTTTTGGGTCAT  
AAATTTAATGACTTTAAGATAACACTTTCACCTGATTTACATGACCCCTCTAACCC  
ACAGGAATTCCTAACTTTTGGTTGAACCCAATAAAAAGAAAGGGACCAGATGTCTTC  
ATGATTCAAATGTATATCAATTAACATGTATTTTCCATTTTTAGGTCAAGAATCTTTC  
TACACACATGTTTATAAACTTCCTCGTCCAAACCGTATTCAAACGGGTAATCTACC  
GTAAAGTTACAAAAGAATCATGTCAAGGTATAATCCCCTGCTGCAACTCAAGGATTC  
TCATGGACCGCTACCGCCATCTAGCGGTTCTTTAAGTCAATGTTTTCGTAAATAAA  
CAGTACCTTAATCTTTGTCGTTTAAATGTTGCATTCGGGATTAATACTATGTACCTTT  
TCAGTTTATTGTCTCTATATGTTGTCTCATTGTTTATTGAAACTATCAATGGAAGTTG  
GCGAACTCTACATATGTCACAATTCAATGATAGTCCGTGTTTGGATTCATTTTAAAG  
GTTATAACGATACATTGTTATTTTTATCCAAAATTAGTAGTAACACTCCAGTATGGTG  
TAGTGTTAAAACGGCTAATTCAGATTTTATTAACCTTCTAACGAAGTACGAGTTTTTGT  
TTTTTTCGACTCGTTCCTCCCCTAAAACTCGCGTCAGCGGAGGGGCGTGTATCATCTT  
AGGTGCTTTTTAACTGAAACGCGCACGTTTCTCGGCCCTTCTTTGCCCCTTCTTTT  
AGCCTCTCTTATTACCTGTTGGATCCTTCACGTATTTTCTTGTTTTATACTCCGTC  
GGAACCTTGTAGCCAGGACGGAACCTTGAACACAGTTTTTCTTCTGTTTTCGAACTTT  
AATTTTTCGAGTTATCATTTTTCTTTAAGGACTTGAACGCTTCCAGTTTTTCTCAAT  
ATTCACCAGCTAAGAAACATTCTATCGATGCTCGGGAAAGAGCAATTTAATAGAATT  
GTCTCTATCGATTTTTGGACATTTTTCTGTTTTTCAAAGTGAACGATAAGCTGATC  
GTCAAACCTTTGGACAATATCCTGAGTTCCTGTTGGGACAGAGCGGACGCGCCGGCACA  
TTTCTGAAGACCCGTTAACAACAGAACACGACCAGAATTATTGCGGTAATTCAGGAC  
TGCAGTGATCGGAGACGGAACCTCCAATACCCGCTTCTTACTCCAGTACCAACTCG  
GCGAGTTCGTTGGGTCTACAACAAGTAAGACGCTCTACAGCTTGTTGTCAATACAGA  
GAAATGCGTGTGCATGCGTGCTCACGATTAAGTCCCCTCTCACTTCACTTCAATATA  
ATCCCAACTCCCCTTTTTCCCTCTTTTGCCGTTCAATAATTTTTCCGAATTTAATCAAT  
AATCTGGTTAGACAGACGTTAAACACTGTGCCATACTGGATTAGTTACAAATAACAT  
TTGTTATCTCTGGGTGCTCTGCATATCTGACGCATTGGGTATCGTTCCGTTATTCTGA  
TTTCTTTGTTTATTATTATTAAAGTAATCACGTATAAAATTCAGAAGTGTGTTG  
TATTGATTATTGGTGGTTGAACGTTTCGTGTAACCTCCGGACCAAAGAATTGGAGACT  
GATTTAGAGAAATTAATAAAGAAATACACTTATCGATTTTCATAACTTTCCATAACT

TATTAATCATAATCAATAAGTTTTGTTCCCTGGTGAGCCAGGTGGTGCCCTTCTTCTTA  
CGAGGTTTGTAAATCCATTTAACGTAATATTAATGATTATTTCCACAACATATTGGT  
GCCCCGTCGCGAGGCGAACTTGCATCAGAAACCGATAATTTACGAATACAGCAC  
TCTAAAAAGCTCATACCTACCACATTATAAAACCATTAAATCCACTGTCCGCTGATG  
ACCAAAACGGCTTTTGTATTTTGTTTAAAACTCGAAGCAGTGTCCCTAATAAAATGTT  
TAAAGATTGGGGGATACCCTTCTGGCTCAGCTGAGTGACATCATCAAAGACGATGA  
CGCATTAAAATCAGCTGATTGGAATTCCTGTGTTATTGTTTTGAATTGTGAAGTATG  
ATCAGAAGCATTGTTGTTGATCGTGTGCGCCGCACACATTTTTCCTGCAGAAGTATTT  
GCCGCTGAGCAATATTGATGTGATATAGGCCTTCTAAACCGCTTTTGTGCGGAGA  
TTCCGAATAAAAGTCTGAGTTTAGCCGTGGTATACGAAATAAGGCACGAGTTTCTGC  
CTTACTGAGTCACTACCGGAAACCCATTATTAGTTTGCAAAGTAGCTAATTGTGAA  
CTTTTAAACGCAATTCGTTGTGGGGTTATTAGGACGTTCCCTCTCTAAAAGAAGGATT  
CGTCGATGTTTTGAACAAGTTGATCGCTTGTGAGTGAGTGTGCACGTTGGTAGCTAA  
GGTTAGCCACGGAGCTAATCCTTCCCTCCTCGTGGCCTCCGGCTCTTGGAGCAACTTG  
GAGTCATTATCGCCCTAGAGGTGGGTGTAGTGATTGATTGCCCGTGATTACGGTCTC  
GTAGGAGCTAAAGTGTTAGCCACAGAGCTAACGGAACCTTCTTCGGGGTTTTTGTG  
TTTTTGACTTCTGGCTCTTTGAGTAACTACCGCCCCCTACCGGTGGGGAGTAGTAATT  
GATCGCTTGTAAGTGTGCCACGTGGTAACTTAGGTGTTAGCCACAGAGCCAACAGG  
AGGCCTCGCCCTCGTCACTCCCGGCTCTTTGGGTCACTACCGTCCCCTAGCGGTGAG  
GAGTAGTAGTGGATCGTTCCCTTGATACAGTTGGAGCAAGAGACTCCATCCTGTGCC  
TGTTTTGAGTAACTGCGGTTATTTAAAAAGTGAATAAAGACTTTAATTAATTCATGA  
CCCTGACGAAACAGACTTGTAAGCTCCTTCCCTCGTTGCATGATCTCTTGTTAACT  
CTGTTTGAAATTTAATGATTTATTTCCCTGCGAAGGCAAACATAACTTTAATTTAAA  
ATTTTCTGACAGGACAGACAAATAGAGCATTAAAGCTAAATCAAAGTAGTTTCCACTT  
TTTGGTTAAGATTGATTTGTTAGTTTGAATAAAATTAATTAACATCAATCCTAAATTT  
CTCCAAACTTTAGTCTAACATAAATAATTAGGGCTACAGCCTCGTGTTAGATTTAAA  
ACGTCCTAGGCAATATCACATTCAAATAACAATCTAATTTGCTGGGTGATGATGCTC  
ATTGTTGTGTTCTGAGAATAATTTAATTCCAGTCTATTAGGTGACCATCAACACCCCA  
GTGAACTTAGACTTGTATTTTATTCCCATAAATTTTTCAAATCCATGTTTTTCCCTCCT  
TATCAAAGGTGCCTAATAATCAGTCAACCATAACTAGCTGTCGTTTAGAACTATTAG  
CTCAGACTAATTAATAAACCAGGACTATTAGTGCACCTTTAAATTGTCAACCAATT  
TTGATTCCTTCTATTCAATTTAATTCGGTCAACACTAGGCTTACACCCTAAGTTTGGT  
TTAATTCGGTTTAAATCTTTAATTTTCCAGCTTTAATCCAATTAGATTTAGATTGGAT  
TTAGGATTTAAAACCTTTAAACTAAACTATTTAAATTGATTTCCAACCTTTAATTAATT  
TCATAATTAAGACCTTTCGATTTTTCTCTTCATTAATTTAATTTTAAATTTACTTTTTA  
ATTTTAAATTTCAATTTTAAATTGTAAATTCTAATTTCAATTTTAAATTGTAAATTTAATT  
TTAATTTAGATTTTTGATTTAGATTTTTTTTTTATTTTAAATTTAAATTTTAAATTT  
TAATTTCCGATTTTCGAATTGCGAATAATAATTTAATTTTAAATTTCAATTTTAAATTT  
AATTTCAATTTTAAATTGATTTTAAATTTTAAATTTTAAATCTTGATTTTAAATTCGGATT  
TTAATTTTGTTTAATTTTAAATTTTAAATTTTAAATTTTAAACATTAATTTTAAACCTTGAA  
TTTTTTTTTCTTTCTTTTCTTTTCTTAGTTCTTTTGCCTCTCCTTTCACTCCTTTCTTAA  
TCTGGTTGACAGTTGATAAGACCCAAACATGGAGGCCCGCCGATAGCCCGCCACCTG  
CAGGCTTCGGTGACCCATTAGATCACTTTGATTCGGTCTGACAGACCTAGTTGGAC  
CACCTCTGCGTGAGTTCGTGACTGAAATTGAGACGACTGACCCCTCTCGACTTCAAG  
AAAAGCTTTCAGACTTGGTTGCCAAGGCTATGTTTGGGCAGGTTAAGGAGAAAGAC  
AAACATAAGATTCTTTCACAAATGGCTGTAATCATGGCAGCCCAAGAGAGACATAC



CCAGAAGTTACTAAACCAGCAGGAGAAGAGCAATAAAGCCCTTCTGCTTATGATTG  
AACAGAAAGACGAACCTCCTCGTCCAGGCCGATGAGAACATCGCAAAGCTTGAGGAA  
GCCAAAGCCCTCCTACAAGCAGAAAAGGAGAATGAGGAAGATAATAGGGAAGATG  
AGTTGAGAGCAACTCTTCATGAGAAAAGAAAATGAGTTGCAGTCAGTTCATAAACAG  
CTCACTGCAGCTGCCAAACGGCTCGACCAGTCTGATGTCCTCCTGATTAAGGCTCAA  
GATAAGTTCCACGACTTAAATGCTACCATCAAAGACCTGACCTCACAATAGAAAG  
GCGGGAACAACACGAATGTGACCTCCAAGCCAAGTTGGACGACGTTTCATTGCGAG  
TAAGCCTGTTTAAACAGCAGCACGCAATGAAAGAGGATGAATTAGCGAGGGTCAGA  
AGACAACCTCAATCTGCTCTGGACCTAGATCCAGGTGACAAACGACCTGGTAATGAA  
TCACCCTTCGAGAGAAAGGATGTTTCGTAGTCCAAGAGAGAATCCTCCTCGATCTGGT  
CTTGTGATTACCCCGATGATTCCCTTGTGGTCTCGAAATCTCGAGCACAGCCCTTACA  
GAAGACTCCGATCTCCTATTTCTGAGGAGCGCCAATCTCTGCCAAGCCCCTCATA  
GAGATTTGGACAAAATAGCTCGTAACATCACCCGTTTCGAGCCGGGTAACAAGGGT  
GGTTTTGAGATTAGCCTATATCTCAAAGACCTTGAGTACCACCTGCGAAAGTTTTCA  
GGTGCTACCACGGACGACAAAATCTATTTGATCAGGATGACGTCCAACAGGACTAT  
CGGCAGTTTTATCGAACGTCAGCCTGACAGGGTTAGGAGTGACTACAAGTTATTGTG  
CCAAAGGTTGATAGACGAATATTCTGATTACATCCACCCACAGGGTTGGCGGCTGC  
TCTTGATCAAAACAAGAAAGAGATGAGTCTCCCCAGGTGTATTACAACCGAATACT  
TCAAGCTTACTTCGGTCCTAAAATGAAATTGGGATGGAAGACGATGTGAACCTTAA  
GGTCCTTTTCATTCAAACCTCCATCCAACAACCTAGCCATCATCTCGGTGTGGCGGC  
TTGTCCACGCACCCTCACCAGTCGACAACCTGCGTGATCTGGCCGTGAGAGGCTTCGC  
CAAATACAAACAGGTCTCTGTCAAAAAGCCCGACACCAACGTCATATTCAGCATTG  
ACACAAACAACATACCCCTCGAGCTTGAAGGAGCCACCGAAAGTATTCGTGAGAAT  
CCTTCAAGGCCAAAGGAAAGGCCATTTAGAGACCACAAACCTTTCCGACCTTCACC  
GGCCAGTGAAAGCCGGAGGGAACAACCACATTCTGGGTTTCGTGGTAATTATCACC  
AACCTGAATCAAGTCGTCACTTCTCTGACATTCGACGACCCAAGTTTCCACCCAGGC  
AGTGGAACAATTGGGACACCCGTGACGGTCAGGCCAAGAGTGGCATCAGA ACTAC  
CGCCCTCGGCCGAGAGACCAACCACGTAACCCAAGGGTCCGAAACGAGTTTCCCAA  
CCAACAGATGCGGGAAACGAGCGATCAAACCCTCCACAAACATATGAGAAGGGC  
AAGGAAGAAGCTATCCATCTTTCAGAGAAAGAGGTAGAAGCTATAAAAAGATTGCT  
AAAGCAGCAATCAAACAAAGGTAAGAAGGCCGACCTACTAGCAGTAAGTTTGGTCA  
AACCTGAAACATCCCCTCCAGACCAGGAAACGAACGTGGAGGAGGAAGAACTCTAT  
CGAAGCGATGATAGCAGCCAGGATATGGTAGAACTTCAATTGATACTGAACCTCT  
AAAATCAGAGGATAAATCAGTTAGCGCAGTCTTGGTAGTCAGTGCTAATTCCACAG  
ACACCTCCAACGGTCAAACCTTGAAGTCATCCAAGGTGAACCACCTTTTCAACAAT  
TCTTGTGTCATCTGATCGAAAGGGGGTAGCACGAAAATTCTACCTGTGACCATTC  
TTGAGGATGAGGTCGAACATGAAGCCCTCCTGGACACAGCAGCCGATGTCACCTTG  
ATGTCATTTGCCCTTTTCAATAAGCTACGTCAGGTAGCTCATCAGTCCAACAGGGAC  
CTGAAACTCCAGCCTTGCCTAATGAACATTCAACCTTACTCGAATGGTAATACGATT  
ATTAAGAAGCTGGCGCTGATAAACTGACCCTGGGACCAATGACAGTCATTCATCC  
AGTTTATGTGTCTCCACTCAGTTCAATCCCTCTTCTTGTGCGCAAGGATCTGCTTAA  
CGCTTCGAACCCCTCATCGACTTTAAACGCTCGAAGATTTGGGCTCAGGTTTCGCAGT  
CCTCTGCCTATATCGCTCCCTTCTCACGACACAGCTCACTGTCTCGTCCTTGAAGGTA  
AAATAGACACACTTGATGGTCAGCCAACACAGTTTACGACCGCCGAAGCGGACGAC  
GACTTTGGCACAACCACAGATGCCAATTCGGGAAAAGGATGGTACCCATCCGACAC  
TCTCGCTCAGCAAGATAACTTCCTCTGTGCTTTTTTCAAACCCCTCGGGGACAGACGA

ATACTGCCCGATGGTAAACCAAGGCATCCATCTCAACGACACACATGTCGAAGACG  
TGGCCTTGGCCCTCTGGGCTGATCAAACCGCCATTAGTCAAGAGCTGTTCAACTCTT  
TGACAAAGGCCAACCCCTGATATCTTGTCTACTCGGGTGCTGAACGCTTTCCTCTCCA  
ACCCAGTCACGAGAGACCATGTCTGCTCAAGGTGCCTGTACCTTGAAGGTGCGCTG  
GAATCACCGAGAGCTACATCATAACTTCTTGGTTCGTTCCCAACCTCCCTCATCCAGC  
CTACATAGGCAGCGACCTGCTAGTCAGGCTGGACGTGCAAATCGACACCATAAACA  
ATCTGCTGTGGTCCCTCAAACCTGTTGGAGACAACACGGCTCCTGATCTGGATAACC  
TCAAATCGGGTCAATCCATTCCAGAAGCATGTCAGGTGGCAAACGCCTTCACGTGG  
TTGTACCAGCAAACACGACAAACATGTCTATAAGGTTGAACATACGACCGGGGCAA  
CGTCGACCCCACTCACAGGTGTTCTTTCAACCATCGTTGCTTTTCTTCACTTGGGCC  
TTACCATTACAGGCCACCCCTTGATGGATCTAGCCTCCAGATCCACACACCTGCTGG  
TACAAAACGAGACCAGGCAGGATATACTGATTCCCAAGTCCACCCCTTGGGGCTGG  
CTGATCAGTACAGAATTTTCATGATTTTGAGCTGAGAATTCCGGTGATAGGACAAATA  
CCTCCACTGTTACTCTCCGGCAGCAACGACGAAAACGTGGTTTACACCAAACCAGCA  
GGAGCTATAACTCTCTTCCCTGCTGTAACACTAACCAAGACACGGTCTGCCGGGTC  
GATCTCACTGACAGTACCCAAATGGTTCTCAAACAGTCCAGGTCATGTCAGTCGAT  
TCATCACCCGATCCAGACACGTATCTTGAGGCAGAGCCGTCACGATCAACTTCAGAC  
ACACCTGCATCTACCAACTTGGACTTCAAACCCAAAGTGGATCAGGTGGTGATAGA  
AGCAGACGCTCTACAGTCAGACGAAGAACGCGAACAACCTTCGCAACATTCTGCTCA  
AGTATGAAAAGTCGTTTGCACAAGATTCACTTGATTGTGGTCTTACCGACATTCCT  
CAGTGCGTATTCCGACGCCACCCGCGGCTCCTCCACGTTTCGTACGCCAATACAAAA  
TACCCTTGGCATCGTACGAACCCGTGCAGGAGATTATTGATGACCTTCTTCACAGAG  
GCATCATTAGACCATGTAATAGTACCTACTCAGCGCCTGTGTGGCCGGTACTTAAAC  
CAAACGGCAAATGGCGACTAACTATCGACTACCGGAAACTGAACCAACAAGTTCCC  
TTGTCCAGGTGGCCGATGACACAATAAACCAGGAACTTCAAAGGTTAAAGACGC  
CAAATACTTCTCTTCCATGGACATTGCGTCCGGATTCTGGACTATTCTGTCCACATA  
GCAGACCAACATAAGCTGGCGTTCACTTTTGCAGGTGACAGTACACGTTACCCAGA  
TGTCCGTTTGGATATGCCAACTCTCCGGCAGAATTCAACATCTTCTTGAACAAATCG  
TGCCCTGACGCCAGCGAGCGTGGCACTCTCATCTATGTTGATGATATCCTTATTCGG  
ACTCCAACCATGAAGGGTCATATAGACGAGATAGAACATGTGCTCGACCAGCTCAC  
CACTGCCGGAGCCAAAATATCTCTGTCCAAATGTCAATGGTGTAAGACAAAGGTAA  
ACTATGTGGGACTCCTAGTCCGGCTCGAATGGCGTAGAACCAACAACCAATAGGGTG  
CAAGGAGTTATGAACATCAAACCTCAAATAACATCTCTGAGCTACGCAGCTTCTTA  
GGTGTTTGCAACTATTCACGCCAATTCATACCCGACTTTGCAGACATTGCGAAACCA  
CTCACTGATCTTCTAAAGAAGGATTCCTTTTACCTTTGGCGAACCTCAAAAAGAG  
GCCATGCAATCTCTGAAACAGCTATTATGCACGGCTCCTTGTCTGGCGTACCCGGAC  
TACCAAAAGGAATTCCATCTGGAAGTTGGATTCTCCAGTCACTGTCTAAGTGCAGGA  
CTTTATCAAGTTCACGACTCAGACAAACGGGTAGTTGCCTACGCCAGCAAGACCCTA  
GCCGCACCTGAGATCAAATACACTGATTGCGAAAAAGCTCTGTTGGCCACAGTCTGG  
GCCACAAAGCACTTCTCAAATACTTGGAGGCCAAAGGGTGATAGTTGAGACTAAT  
CACCAACCAGTTACTTTCTTAAACAGCCAACGGATTAGGGACGGAGTTGTGACGAAC  
TCCCGAGTCGCGTCTTGGTTGATGGCCCTGCAAAGTTTTGACATGGAAGTGCCTAT  
GCTCAGAATCGCAAACGCCTCTCGGCATGGAACCTGCAGCATGCCAACATTGTTCC  
GAAGAATCGCCAATTGACTCAATTGTGCTAACCGACAGTGTGCTCCCTGAACCTTCT  
AACCACCATTACTTTGACCCCAATGTCTGTGCAGACATGGTCACAGCATATGTGGAT  
GGGTGTTCAATTCCACCATGAAACTCAAGTAAGGTCGGGAGCAGGAGTTCTGTGGGTC

CACGACACTCCATGTGAACCACAATGTTTTCAACTTGGGTCACAATCGTCCCAATAC  
GCCGAGATCGCGGCGATCCTGATAACATTGCAATTAGCAAAAAGAAAACGATGTCAA  
AAATCTGACAATATGCACTGACTCGAACTACGCTCGTTTGAGTTTCACCTCCCACTT  
ACCATTGTGGATCAAAAATGGCTTCATGACTTCAAACCGTAAACCGGTCAAACACA  
AAGAACTTTTCATAGCTTGCAAACAACCTGTAGACACGTGCGATATGCAAATCTACT  
GGAAAAGGTCAGAGGTCCTCCGAGTCCCTGGTGCAGGACAAGGATCTGAACGAC  
CAGGCAGACAACTGGCCAAACAGGGGGCCATTATCGGCACACCCTGGCAGTTTGA  
CGGAACTCGGTTCCACCCAAGCCCTTCCCACTGTTTGTGCTGTTACACGTTTCAGG  
CACGACAGCGACACCAGATCCTCGTCGACCATCGCCTGTTTCGGCCTCGGTGTCACC  
TGCCTTCGCCAGCTCGGATCTCTTGACACTACAAACCGAAGACTCATCTATTCGTGC  
TATGACACTATTTCTTTTCAGATCCTTCTGCTCACCCAATCTCCAAAGATGATCTTGAT  
TCAGATGACACCTTGGCGTTTCTTTTTTCGGGCACGTGCTTCTTTCAAAGTCGTCAATG  
GGCTGCTTGTTCATGTCTCTGACACACTACCACACCTGCGTTTGTGGTGCCTCAGAG  
CCTAAGGGGGGTGATGCTAACCATGCCATGACTCCCCTTGTTTCAGGCCACAGAGG  
TATCAAAGCCACCCTGAAGTCATTACAGGAAGTCGCCTACTGGCCACACATGCAGA  
AAGATGTGTTAGATTACATCAAGGGTTGCTTGGTGTGCTGTCAATTCCAACCAGCAA  
GCACTCTTACCGAGCACCCTACAGCGACGAGGTGTCTCATTCCCCTGGTCTGATC  
TTCAAATCGACTGGGTGGGACCCCTCACAAAATCCACCAGAGGCAACAAATACTTT  
CTCACGGTGGTATGTGCATTCACCAAATGGGTGGAATGCTTACCTGCACCGAATGAC  
ACAGCTCAAACCACCGGTACCTCTTGATGAATCATATCTTCTCGAGGTTTCGGTCTG  
CCTGGCAGAGTTAACTCTGACAGAGGCACACACTTCACGGCTGAAATGATGCAGCA  
GCTATGGCAGCTGCTGGGTGTGAAAGCCAACTTTCACATCAGTTACCGTCCACAATC  
GTCAGGACAAGTGGAACGGGCTAACCGAACAGTCGTGAACATCCTCAGAAAGTATG  
TGTCTCAAACCACAAGGATTGGGACGTTAAACTCCCCCTTGCTTGTATGGCCATCA  
GGGCGACACCCACGAGTCAACCGGACTCTCGCCCTTCGAGTTGATGACGGGAAGG  
CAGATGACTCTGCCCTGCACTTGCTCTATCAACCGGGTGAAGCCAGCATCGCCACG  
GCTTACACCGCACACCAGTACATGACTGACCTACACCAACACTTGAGTGCCACTTTC  
GTTTTCGCCAGAAAAATCTGGACAAGAGCGCAGAAGGAAGCAAAACCTACTATGA  
CAAAAAGGCATCCCACGATGAACTCCAGGTGGGAGATAAAGCGTGGTTTTACATCT  
TTGCTCAAACCATAGACAACGACAACCACAATGCTGGAAAACATGGTTCGTAAGTTC  
CTGCCCCACTGGGCTGGACCTTACGTCATCACACAGAACTCTCCCCTGTGGTATAT  
CAGCTCAAGATTACCAAAGGACAGAAAGAACCTATGCTGAAATGGGTACATCGCAA  
CCAAATTAAGCCACACAAAAACCCCATGGGACTAGTCGGGGACTCCAACGTCCCAG  
TTAGGTCATAAAAGCTAGAAAGACCAAAGTTCTAGAGGGAAGAAGAGTTAGGCTAC  
AGTACTAATTAGTTCAGAGAAACAGTTAATAACTCTTGCTTGCTCTATCTTTTCTCTA  
ATCCTCTACTCTCATTTCAAATTACAGACGACCAGACCTTTGACGTTACACCCGGCCG  
AAAAGAATGAATCCGTTGCTGCTCCTCGCGACCTTTTTGGTGATGGGTGTCCCGGTC  
TCTCCAGAGATGGTACAGACGGGACCCCGTCCGGGATTGCGCTAACGCCAATCC  
CGGACTACTGATACCAACTGTCGCCTGCACACACAGAAGGTGTTTGTGAGGTTCCG  
CCCCGTGAGGTACTCCAGAAGCATCTCCAAGCGACTGGAAGCCTCACCAGTTGGG  
CTGGAATGACCTGGACCAGGAACGCGATTAAGCACGCTGAGGCAGACGTGGCTCAT  
ATGCTCCTTCAACTACAGAAATTCACGGTGTCTCAAGATGAACTACAGGGAAAGAA  
CAAAAGGCAGAAACGGTTTATCGGAGCCCTACTTACTGCAGCCACAGCAGTAGGCT  
CCCTATTCAGCATCGGACTCTTCCGTCAATGCCGTCAGCCTAGCAACCGTCAAAC  
GTCACATCACAGAGTTAGACGCGAGAAATCCCGAAATACAGTCACGACTACACCTT  
CAACAACAGTCGCTCCAAACCATAGGAGAACTCTTAAGGGAACGGTCTGATTGT

GAATACTCAGAGTCTCGCTCTGAACCGAACCATCAGGGCTGTAGACTCCCTTCTGAC  
AGTAATGCAGGTGGACTACGCTCACACACAACCTGGTGGACATGCTAATGACAGACA  
TGCTGAGAGAGGTGGGTCATCAGTAGACAGTCTAGCTACAGGCCAGATTCCCCCTT  
TCCTTGTCCCCCTCTCCCTAGTACAGAACCTCTTAGCCAAAGCCACTAAGGAAACCA  
TCACACCCCTACAAGCCCATCTAGCGTATACCCTTGGTAGTGCTGTTCCCTCTACGT  
CAACCCTGAAAGCGGAGACGTATCCTTCCCTCAACCTTCCCATAATAGCTTCAGA  
AAACATTTATCGGCTCAAGAACGTGGTGAATGTGGGATGGTGGCAAGGAGATACCC  
ATCTGAAGGTGCAAACACCCACGATGGTGGCCTACCATGACGATAGTCCCGAATTGT  
ATTTGGCACCCAACCTGCGAATGTGCACCCTTACCAAGGAAATCCATTACCTGTGTC  
CAAGCAAACCATTCGTACGTGACAGTACTAATGGAATTTGTGGACTCAAGCCCATGT  
TGGCAGAAACTCGCTGTCCCAACTGCCACTTCTCGATCCCAGGTCACAGACACCC  
AAATTGAAATCGTAGGTGATAGATGGCTAGTAAACACTCCGTTCAAAGTAGCCACTC  
TCACTTACGGACAACATGACACTGCTACACGGGTTCCCTCCCAGAGGAGACGTTAT  
GGATTACCGTCCCTGAAAACGCTATCCTCCACATTGACGACATGGCCATCTACTATC  
TAAACTCCGAACAATACGAGACTGACATTGAACTTCCCGATTTCTTCAAAAACCTACC  
AAGTAAAATCGACCCCAACGCTATCGCTCAAATACAATATGTAGGAACCCAAACT  
ATTGACCTAACACCACTTAACGACATCTTACAGATCACTACACCATCAGAAAGACCA  
CCCATAACAACCGTTAAACTACACATGGTCCACCCCGACACCTTACTCGCCCTTACC  
ATAGGACTCGGGTATGTGTTAACGTTTGCCATAGCCTTCATATGTGCTAGACGTA  
CGAGCCCTCCAGAGGCAACTAAACAAGTGTCCACTAGTATGTCCAAACTGCGTAA  
ACACCACGGCAGGAGTAGAACCACTGAAAGGGATGACGAAGACGAAGATGTCGCT  
ACCAAATCTCTCCTACTCTTATAGAGCTAGAATCCGAAACCTCCGTGCCCATTTAGT  
CTAGATCACCGCCACATAGTGGTCCTGGATCCATGAGCACCTCAGACCCTTAAGCTC  
ATGTTATATTATTGACTTCATACTTCCAATTATTAGGCATTGTATGGCCATTCATAA  
AATTATTAGATTAGTGACATAATTACTTGTACCCCATATACTTAGATTTTTGTTTTT  
GGTGTATTATTGTTTATTCATGACACGATTTCTCTGTGACACCTGCTGTTGATGCTGTT  
TACTGTTTGTGTCATCACCTTAATTGGCCTGCNGATTCTCTCTCCAAGGATTCACA  
TGCCAAAAGGGGGGACTGTTACGAATAATTCCTTATCTATCTAAAGTCACAAAAGG  
GCCTCCACTGGAGTCTTCGAGTCTGCTCACACTCACCATCTGTGTTGACTTAAATCAA  
CATTTTTATGACTCTCTACCCTGTTTTCCGACACGGCAATCTGTCACAGATGCTCACC  
ACTTTCATCTTAAAGAACCTTCTCACCTTGTGGATTTTAAAGGACAACATCATCAA  
AGACTCTAATACACAATCCCCCGTCTGAACCCTGGATGAAACCAGTTCCTCCTTTTT  
GGGTCATAAATTTAATGACTTTAAGATAAACACTTTCACCTGATTTACATGACCCCT  
CTAACCCACAGGAATTCCTAACTTTTGGTTGAACCCAATAAAAAGAAAGGGACCAG  
ATGCTTTCATGATTCAAATGTATATCAATTAACATGTATTTTCCATTTTTAGGTC AAG  
AATCTTTCTACACACATGTTTATAAACTTCCTCGTCCAAACCGTATTCAAACGGGT  
AATCTACCGTAAAGTTACAAAAGAATCATGTCAAGGTATAATCCCCTGCTGCAACTC  
AAGGATTCTCATGGACCGCTACCGCCATCTAGCGGTTCCTTTAAGTCAATGTTTTCGT  
TAATAAACAGTACCTTAATCTTTGTCGTTTAAATGTTGCATTCGGGATTAATACTATG  
TACCTTTTCAGTTTATTGTCTCTATATGTTGTCTCATTGTTTATTGAAACTATCAATGG  
AAGTTGGCGAACTCTACATATGTCACAATTCAATGATAGTCCGTGTTTGGATTCATTT  
TAAAGGTTATAACGATACATTGTTATTTTTATCCAAAATTAGTAGTAACACTCCAGT  
ATGGTGTAGTGTTAAAACGGCTAATTCAGATTTTATTAACCTTCTAACGAAGTACGAG  
TTTTTGTTTTTTCGACTCGTTCCTCCCCTAAAACCTCGCGTCAGCGGAGGGGCGTGTAT  
CATCTTAGGTGCTTTTTAAACTGAAACGCGCACGTTTCTCGGCCCTTCTTTTGCCCT  
TCTTTAGCCTCTCTTTATTACCTGTTGGATCCTTCACGTATTTTCCCTGTTTTATACT

CCGTCGGAAC TTTGTAGCCAGGACGGAAC TTTGAAAACAGTTTTTCTTCTGTTTTTCGA  
ACTTTAATTTTTTCGAGTTATCATTTTTCTTTAAGGACTTGAACGCTTCCAGTTTTTCC  
TCAATATTCACCAGCTAAGAAACATTCTATCGATGCTCGGGAAAGAGCAATTTAATA  
GAATTGTCTCTATCGATTTTTGGACATTTTTCTGTTTTTCAAAGTGAACGATAAGC  
TGATCGTCAAAC TTTGGACAATATCCTGAGTTCCTGTTGGGACAGAGCGGACGCGCCG  
GCACATTTCTGAAGACCCGTTAACAACAGAACACGACCAGAATTATTGCGGTAATTC  
AGGACTGCAGTGATCGGAGACGGAAC TTTCCAATACCCGCTTCTTACTCCAGTACCA  
ACTCGGCGAGTTCGTTGGGTCTACAACAAGTAAGACGCTCTACAGCTTGTTGTCAAT  
ACAGAGAAATGCGTGT CATGCGTGT CACGATTAAGTCCC ACTCTCACTTCAGTTTA  
ATATAATCCCAACTCCCCTTTTTCCCTCTTTTGCCGTTCAATAATTTTTCCGAATTTAA  
TCAATAATCTGGTTAGACAGACGTTAAACACTGTGCCATACTGGATTAGTTACAAAT  
AACATTTGTTATCTCTGGGTGCTCTGCATATCTGACGCATTGGGTATCGTTCCGTTAT  
TCTGATTTCTTTGTTT CATTATTATT CATTAAAGTAATCACGTATAAAATTCAGAAGTG  
TGTTGTATTGATTATTGGTGGTTGAACGTTTTCGTGTA ACTCCGGACCAAAGAATTGG  
AGACTGATTTAGAGAAATTAATAAAGAAATACACTTATCGATTTTCATAACTTTCCA  
TAACTTATTAATCATAATCAATAAGTTTTGTTCTGTTGAGCCAGGTGGTGCCCTTCT  
TCTTACGAGGTTTGTTAATCCATTTAACGTAATATTAATGATTATTTCCACAACAAC  
TATG

> Loki-Sme consensus sequence 5'LTR

TGTTACGAATAATTCCTTATCTATCTAAAGTCACAAAAGGGCCTCCACTGGAGTCTT  
CGAGTCTGCTCACACTCACCATCTGTGTTGACTTAAATCAACATTTTTATGACTCTCT  
ACCCTGTTTTCCGACACGGCAATCTGTCACAGATGCTCACC ACTTTCCATCTTAAAG  
AACCTTCTCACCTTGTGGATTTTAAAGGACAACATCATCAAAGACTCTAATACACAA  
TCCCCCGTCTGAACCCTGGATGAAACCAGTTCCTCCTTTTTGGGT CATAAATTTAAT  
GACTTTAAGATAACACTTTCACCTGATTTACATGACCCCTCTAACCACAGGAATT  
CCTAACTTTTGGTTGAACCAATAAAAAGAAAGGGACCAGATGTCTTCATGATTCAA  
ATGTATATCAATTAACATGTATTTTCCATTTTTAGGTCAAGAATCTTTCTACACACAT  
GTTTATAAACTTCTCGTCCAAACCGTATTTCAAACGGGTAATCTACCGTAAAGTTA  
CAAAGAATCATGTCAAGGTATAATCCCCTGCTGCAACTCAAGGATTCTCATGGACC  
GCTACCGCCATCTAGCGGTTCTTTAAGTCAATGTTTTCGTAAATAAACAGTACCTTA  
ATCTTTGTCGTTTAAATGTTGCATTTCGGGATTAATACTATGTACCTTTTCAGTTTATT  
GTCTCTATATGTTGTCTCATTGTTTATTGAAACTATCAATGGAAGTTGGCGAACTCTA  
CATATGTCACAATTCAATGATAGTCCGTGTTTGGATTCATTTTAAAGGTTATAACGAT  
ACATTGTTATTTTTATCCAAAATTAGTAGTAACACTCCAGTATGGTGTAGTGTTAAA  
ACGGCTAATTCAGATTTTATTA ACTTCTAACGAAGTACGAGTTTTTGTTTTTTTCGAC  
TCGTTCCCTCCCCTAAA ACTCGCGTCAGCGGAGGGGCGTGTATCATCTTAGGTGCTTTT  
TAAACTGAAACGCGCACGTTTCTCGGCCCTTCTTTTGCCCTTCTTTTAGCCTCTCTTT  
ATTACCTGTTGGATCCTTCACGATTTTTCCCTGTTTTATACTCCGTCGGAAC TTTGTA  
GCCAGGACGGAAC TTTGAAAACAGTTTTTCTTCTGTTTTCGAAC TTTAATTTTTTCGAG  
TTATCATTTTTCTTTAAGGACTTGAACGCTTCCAGTTTTTCTCAATATTCACCAGCT  
AAGAAACATTCTATCGATGCTCGGGAAAGAGCAATTTAATAGAATTGTCTCTATCGA  
TTTTTGGACATTTTTCTGTTTTTCAAAGTGAACGATAAGCTGATCGTCAAAC TTTG  
GACAATATCCTGAGTTCCTGTTGGGACAGAGCGGACGCGCCGGCACATTTCTGAAGAC  
CCGTTAACAACAGAACACGACCAGAATTATTGCGGTAATTCAGGACTGCAGTGATC  
GGAGACGGAAC TTTCCAATACCCGCTTCTTACTCCAGTACCAACTCGGCGAGTTCGT  
TGGGTCTACAACAAGTAAGACGCTCTACAGCTTGTTGTCAATACAGAGAAATGCGTG

TCATGCGTGCTCACGATTAAGTCCCCTCTCACTTCAGTTTAATATAATCCCAACTCC  
CCTTTTTCCCTCTTTTGCCGTTCAATAATTTTTCCGAATTTAATCAATAATCTGGTTAG  
ACAGACGTTAAACACTGTGCCATACTGGATTAGTTACAAATAACATTTGTTATCTCT  
GGGTGCTCTGCATATCTGACGCATTGGGTATCGTTCCGTTATTCTGATTTCTTTGTTT  
ATTATTATTCATTAAAGTAATCACGTATAAAATTCAGAAGTGTGTTGTATTGATTATT  
GGTGGTTGAACGTTTCGTGTAACCTCCGGACCAAAGAATTGGAGACTGATTTAGAGA  
AATTAATAAAGAAATACACTTATCGATTTTCATAACTTTCCATAACTTATTAATCATA  
ATCAATAAGTTTTGTTTCTGGTGAGCCAGGTGGTGCCTTCTTCTTACGAGGTTTGTT  
AATCCATTTAACGTAATATTAATGATTATTTTCCACAACA

> Loki-Sme consensus sequence 3'LTR

TGTTACGAATAATTCCTTATCTATCTAAAGTCACAAAAGGGCCTCCACTGGAGTCTT  
CGAGTCTGCTCACACTCACCATCTGTGTTGACTTAAATCAACATTTTTATGACTCTCT  
ACCCTGTTTTCCGACACGGCAATCTGTCACAGATGCTCACCCTTTCCATCTTAAAG  
AACCTTCTCACCTTGTGGATTTTAAAGGACAACATCATCAAAGACTCTAATACACAA  
TCCCCCGTCTGAACCCTGGATGAAACCAGTTCCTCCTTTTTGGGTCATAAATTTAAT  
GACTTTAAGATAACACTTTCACCTGATTTACATGACCCCTCTAACCACAGGAATT  
CCTAACTTTTGGTTGAACCAATAAAAAGAAAGGGACCAGATGTCTTCATGATTCAA  
ATGTATATCAATTAACATGTATTTCCATTTTTAGGTCAAGAATCTTTCTACACACAT  
GTTTATAAACTTCCTCGTCCAAACCGTATTCAAAACGGGTAATCTACCGTAAAGTTA  
CAAAAGAATCATGTCAAGGTATAATCCCCTGCTGCAACTCAAGGATTCTCATGGACC  
GCTACCGCCATCTAGCGGTTCCTTAAGTCAATGTTTTCGTTAATAAACAGTACCTTA  
ATCTTTGTCGTTTAAATGTTGCATTTCGGGATTAATACTATGTACCTTTTTCAGTTTATT  
GTCTCTATATGTTGTCTCATTGTTTATTGAAACTATCAATGGAAGTTGGCGAACTCTA  
CATATGTCACAATTCAATGATAGTCCGTGTTTGGATTCATTTTAAAGGTTATAACGAT  
ACATTGTTATTTTTATCCAAAATTAGTAGTAACACTCCAGTATGGTGTAGTGTTAAA  
ACGGCTAATTCAGATTTTATTAACCTTCTAACGAAGTACGAGTTTTTGTTTTTTCGACT  
CGTTCCTCCCCTAAAACCTCGCGTCAGCGGAGGGGCGTGTATCATCTTAGGTGCTTTTT  
AAACTGAAACGCGCACGTTTCTCGGCCCTTCTTTTGCCCCTTCTTTTAGCCTCTCTTT  
ATTACCTGTTGGATCCTTCACGTATTTTTCCTTGTTTTATACTCCGTCGGAACCTTTGTA  
GCCAGGACGGAACCTTGAAAACAGTTTTTCTTCTGTTTTCGAACTTTAATTTTTCGAG  
TTATCATTTTTCTTTAAGGACTTGAACGCTTCAGTTTTTCTCAATATTCACCAGCT  
AAGAAACATTCTATCGATGCTCGGGAAAGAGCAATTTAATAGAATTGTCTCTATCGA  
TTTTTGACATTTTTCTGTTTTTCAAAGTGAACGATAAGCTGATCGTCAAACCTTG  
GACAATATCCTGAGTTCCTGTTGGGACAGAGCGGACGCGCCGGCACATTTCTGAAGAC  
CCGTTAACAACAGAACACGACCAGAATTATTGCGGTAATTCAGGACTGCAGTGATC  
GGAGACGGAACCTCCAATACCCGCTTCTTACTCCAGTACCAACTCGGCGAGTTCGT  
TGGGTCTACAACAAGTAAGACGCTCTACAGCTTGTTGTCAATACAGAGAAATGCGTG  
TCATGCGTGCTCACGATTAAGTCCCCTCTCACTTCAGTTTAATATAATCCCAACTCC  
CCTTTTTCCCTCTTTTGCCGTTCAATAATTTTTCCGAATTTAATCAATAATCTGGTTAG  
ACAGACGTTAAACACTGTGCCATACTGGATTAGTTACAAATAACATTTGTTATCTCT  
GGGTGCTCTGCATATCTGACGCATTGGGTATCGTTCCGTTATTCTGATTTCTTTGTTT  
ATTATTATTCATTAAAGTAATCACGTATAAAATTCAGAAGTGTGTTGTATTGATTATT  
GGTGGTTGAACGTTTCGTGTAACCTCCGGACCAAAGAATTGGAGACTGATTTAGAGA  
AATTAATAAAGAAATACACTTATCGATTTTCATAACTTTCCATAACTTATTAATCATA  
ATCAATAAGTTTTGTTTCTGGTGAGCCAGGTGGTGCCTTCTTCTTACGAGGTTTGTT  
AATCCATTTAACGTAATATTAATGATTATTTTCCACAACA

> Loki-Sme consensus sequence *smc-gag-pol* gene

ATGGAGGCCCGCCGATAGCCCGCCACCTGCAGGCTTCGGTGACCCATTAGATCACTTT  
GATTCGGTTCTGACAGACCTAGTTGGACCACCTCTGCGTGAGTTCGTGACTGAAATT  
GAGACGACTGACCCCTCTCGACTTCAAGAAAAGCTTTCAGACTTGGTTGCCAAGGCT  
ATGTTTGGGCAGGTTAAGGAGAAAGACAAACATAAGATTCTTTCACAAATGGCTGT  
AATCATGGCAGCCCAAGAGAGACATACCCAGAAGTTACTAAACCAGCAGGAGAAG  
AGCAATAAAGCCCTTCTGCTTATGATTGAACAGAAAGACGAACTCCTCGTCCAGGCC  
GATGAGAACATCGCAAAGCTTGAGGAAGCCAAAGCCCTCCTACAAGCAGAAAAGG  
AGAATGAGGAAGATAATAGGGAAGATGAGTTGAGAGCAACTCTTCATGAGAAAGA  
AAATGAGTTGCAGTCAGTTCATAAACAGCTCACTGCAGCTGCCAAACGGCTCGACC  
AGTCTGATGTCCTCCTGATTAAGGCTCAAGATAAGTTCCACGACTTAAATGCTACCA  
TCAAAGACCTGACCTCACAAATAGAAAGGCGGGAACAACACGAATGTGACCTCCAA  
GCCAAGTTGGACGACGTTTCATTGCGAGTAAGCCTGTTTAAACAGCAGCACGCAATG  
AAAGAGGATGAATTAGCGAGGGTCAGAAGACAACCTTCAATCTGCTCTGGACCTAGA  
TCCAGGTCGACAACGACCTGGTAATGAATCACCCCTTCGAGAGAAAGGATGTTTCGTA  
GTCCAAGAGAGAATCCTCCTCGATCTGGTCTTGTGATTACCCCGATGATTCCCTTG  
GTCTCGAAATCTCGAGCACAGCCCTTACAGAAGACTCCGATCTCCTATTTCTGAGGA  
GCGCCAATCTCTGCCAAGCCCTCATAACAGAGATTTGGACAAAATAGCTCGTAACAT  
CACCCGTTTCGAGCCGGGTAACAAGGGTGGTTTTGAGATTAGCCTATATCTCAAAGA  
CCTTGAGTACCACCTGCGAAAGTTTTAGGTGCTACCACGGACGACAAAATCTATTT  
GATCAGGATGACGTCCAACAGGACTATCGGCAGTTTTATCGAACGTCAGCCTGACA  
GGGTTAGGAGTGACTACAAGTTATTGTGCCAAAGGTTGATAGACGAATATTCTGATT  
ACATCCACCCACAGGGTTGGCGGCTGCTCTTGTGATCAAACAAGAAAGAGATGAG  
TCTCCCAGGTGTATTACAACCGAATACTTCAAGCTTACTTCGGTCCTAAAAATGAA  
ATTGGGATGGAAGACGATGTGAACTTAAGGTCCTTTTCATTCAAACCTCCATCCA  
ACAACCTAGCCATCATCTCGGTGTGGCGGCTTGTCCACGCACCCTACCAGTCGACAA  
CTGCGTGATCTGGCCGTGAGAGGCTTCGCCAAATACAAACAGGTCTCTGTCAAAAA  
GCCCGACACCAACGTCATATTCAGCATTGACACAAACAACATAACCCCTCGAGCTTGA  
AGGAGCCACCGAAAGTATTCGTGAGAATCCTTCAAGGCCAAAGGAAAGGCCATTTA  
GAGACCACAAACCTTTCCGACCTTCACCGGCCAGTGAAAGCCGGAGGGAACAACCA  
CATTCTGGGTTTCGTGGTAATTATCACCACCTGAATCAAGTCGTCACTTCTCTGACA  
TTCGACGACCCAAGTTTCCACCCAGGCAGTGGAACAATTGGGACACCCGTGACGGT  
CAGGCCCAAGAGTGGCATCAGAACTACCGCCCTCGGCCGAGAGACCAACCACGTAA  
CCCAAGGGTCCGAAACGAGTTTCCCAACCAACAGATGCGGGAAAACGAGCGATCAA  
ACCCTCCACAAACATATGAGAAGGGCAAGGAAGAAGCTATCCATCTTTCAGAGAAA  
GAGGTAGAAGCTATAAAAAGATTGCTAAAGCAGCAATCAAACAAGGTAAGAAGG  
CCGACCTACTAGCAGTAAGTTTGGTCAAACCTGAAACATCCCCTCCAGACCAGGAA  
ACGAACGTGGAGGAGGAAGAACTCTATCGAAGCGATGATAGCAGCCAGGATATGGT  
AGAACTTCAATTGATACTGAACCTCTAAAATCAGAGGATAAATCAGTTAGCGCAG  
TCTTGGTAGTCAGTGCTAATTCCACAGACACCTCCAACGGTCAAACCTTTGAAGTCA  
TCCAAGGTGAACCACCTTTTCAACAATTCTTGTGTCATCTGATCGAAAGGGGGGTAG  
CACGAAAATTCTACCTGTCGACCATTCTTGAGGATGAGGTCGAACATGAAGCCCTCC  
TGGACACAGCAGCCGATGTCACCTTGATGTCATTTGCCCTTTTCAATAAGCTACGTC  
AGGTAGCTCATCAGTCCAACAGGGACCTGAAACTCCAGCCTTGCCTAATGAACATTC  
AACCTTACTCGAATGGTAATACGATTATTAAGAAGCTGGCGCTGATAAACTGACCC  
TGGGACCAATGACAGTCATTCATCCAGTTTATGTGTCTCCACTCAGTTCAATCCCTCT

TCTTGTCGGCAAGGATCTGCTTAACCGCTTCGAACCCCTCATCGACTTTAAACGCTC  
GAAGATTTGGGCTCAGGTTGCGAGTCCTCTGCCTATATCGCTCCCTTCTCACGACAC  
AGCTCACTGTCTCGTCCTTGAAGGTAATAAGACACACTTGATGGTCAGCCAACACA  
GTTTACGACCGCCGAAGCGGACGACGACTTTGGCACAACCACAGATGCCAATTCGG  
GAAAAGGATGGTACCCATCCGACACTCTCGCTCAGCAAGATAACTTCCTCTGTGCTT  
TTCAAACCCCTCGGGGACAGACGAATACTGCCCGATGGTAAACCAAGGCATCCAT  
CTCAACGACACACATGTGGAAGACGTGGCCTTGGCCCTCTGGGCTGATCAAACCGCC  
ATTAGTCAAGAGCTGTTCAACTCTTTGACAAAGGCCAACCCCTGATATCTTGTCTACT  
CGGGTGCTGAACGCTTTCCTCTCCAACCCAGTCACGAGAGACCATGTCTGCTCAAG  
GTGCCTGTACCTTGAAGGTGCGCTGGAATCACCGAGAGCTACATCATAACTTCTTGG  
TCGTTCCCAACCTCCCTCATCCAGCCTACATAGGCAGCGACCTGCTAGTCAGGCTGG  
ACGTGCAAATCGACACCATAACAATCTGCTGTGGTCCCTCAAACCTGTTGGAGACA  
ACACGGCTCCTGATCTGGATAACCTCAAATCGGGTCAATCCATTCCAGAAGCATGTC  
AGGTGGCAAACGCACTTCACGTGGTTGTACCAGCAAACACGACAAACATGTCTATA  
AGGTTGAACATACGACCGGGGCAACGTCGACCCCACTCACAGGTGTTCTTCAACCA  
TCGTTGCTTTTCTTTCACTTGGGCCTTACCATTGAGGCCACCCCTTGTGATGATCTAG  
CCTCCAGATCCACACACCTGCTGGTACAAAACGAGACCAGGCAGGATATACTGATT  
CCCAAGTCCACCCCTTGGGCTGGCTGATCAGTACAGAATTCATGATTTTGAGCTG  
AGAATTCCGGTGATAGGACAAATACCTCCACTGTTACTCTCCGGCAGCAAACGACGA  
AAACGTGGTTTACACCAAACCAGCAGGAGCTATAACTCTTCCCTGCTGTAACACT  
AACCCAAGACACGGTCTGCCGGTTCGATCTCACTGACAGTACCCAAATGGTTCTCCA  
AACAGTCCAGGTCATGTGAGTCGATTCATCACCCGATCCAGACACGTATCTTGAGGC  
AGAGCCGTCACGATCAACTTCAGACACACCTGCATCTACCAACTTGGACTTCAAAC  
CCAAGTGGATCAGGTGGTGATAGAAGCAGACGCTCTACAGTCAGACGAAGAACGCG  
AACAACTTCGCAACATTCTGCTCAAGTATGAAAAGTCGTTTGCACAAGATTCACTTG  
ATTGTGGTCTTACCGACATTCACTCAGTGCATATTCCGACGCCACCCGCGGCTCCTC  
CCACGTTTCGTACGCCAATACAAAATACCCTTGGCATCGTACGAACCCGTGCAGGAG  
ATTATTGATGACCTTCTTCACAGAGGCATCATTAGACCATGTAATAGTACCTACTCA  
GCGCCTGTGTGGCCGGTACTTAAACCAAACGGCAAATGGCGACTAACTATCGACTA  
CCGGAAACTGAACCAACAAGTTCCCTTGTCCAGGTGGCCGATGACACAACCTAAACC  
AGGAACTTCCAAAGGTTAAAGACGCCAAATACTTCTCTTCCATGGACATTGCGTCCG  
GATTCTGGACTATTCCCTGTCCACATAGCAGACCAACATAAGCTGGCGTTCACTTTTG  
CAGGTGACAGTACACGTTACCCAGATGTCCGTTTGGATATGCCAACTCTCCGGCAG  
AATTCAACATCTTCTTGAACAAATCGTGCCCTGACGCCAGCGAGCGTGGCACTCTCA  
TCTATGTTGATGATATCCTTATTCGGACTCCAACCATGAAGGGTCATATAGACGAGA  
TAGAACATGTGCTCGACCAGCTCACCCTGCCGGAGCCAAAATATCTCTGTCCAAT  
GTCAATGGTGTAAAGACAAAGGTAACCTATGTGGGACTCCTAGTCGGCTCGAATGGC  
GTAGAACCACAAACCAATAGGGTGAAGGAGTTATGAACATCAAACCTCCAACATA  
CATCTCTGAGCTACGCAGCTTCTTAGGTGTTTGCAACTATTACGCCAATTCATACCC  
GACTTTGCAGACATTGCGAAACCACTCACTGATCTTCTAAAGAAGGATTCCCTTTTC  
ACCTTTGGCGAACCTCAAAAAGAGGCCATGCAATCTCTGAAACAGCTATTATGCACG  
GCTCCTTGTCTGGCGTACCCGGACTACCAAAGGAATTCATCTGGAAGTTGGATTCT  
TCCAGTCACTGTCTAAGTGCAGGACTTTATCAAGTTCACGACTCAGACAAACGGGTA  
GTTGCCTACGCCAGCAAGACCCTAGCCGCACCTGAGATCAAATACACTGATTGCGA  
AAAAGCTCTGTTGGCCACAGTCTGGGCCACAAAGCACTTCTCCAACCTATCTTGGAGG  
CCAAAGGGTGATAGTTGAGACTAATACCAACCAGTTACTTTCCTTAACAGCCAACG



GATTAGGGACGGAGTTGTGACGAACTCCCGAGTCGCGTCTTGGTTGATGGCCCTGCA  
AAGTTTTGACATGGAAGTGCCTATGCTCAGAATCGCAAACGCCTCTCGGCATGGA  
ACTTGCAGCATGCCAACATTGTTCCGAAGAATCGCCAATTGACTCAATTGTGCTAAC  
CGACAGTGTGCTCCCTGAACCTTCTAACCACCATTACTTTGACCCCAATGTCTGTGC  
AGACATGGTCACAGCATATGTGGATGGGTGTTCAATCCACCATGAACTCAAGTAAG  
GTCCGGGAGCAGGAGTTCTGTGGGTCCACGACACTCCATGTGAACCACAATGTTTTCA  
ACTTGGGTCAACAATCGTCCCAATACGCCGAGATCGCGGCGATCCTGATAACATTGCA  
ATTAGCAAAAAGAAAACGATGTCAAAAATCTGACAATATGCACTGACTCGAACTACG  
CTCGTTTGTGTTTACCTCCACTTACCATTGTGGATCAAAAATGGCTTCATGACTTC  
AAACCGTAAACCGGTCAAACACAAAGAACTTTTCATAGCTTGCAAACAATTGTAG  
ACACGTGCGATATGCAAATCTACTGGAAAAAGGTGAGAGGTCACTCCCGAGTCCCT  
GGTGCAGGACAAGGATCTGAACGACCAGGCAGACAAACTGGCCAAACAGGGGGCCA  
TTATCGGCACACCCTGGCAGTTTGTGCGAACTCGGTTCCACCCAAGCCCTTCCCA  
CTGTTTGTGCTGTTACACGTTTACAGGCACGACAGCGACACCAGATCCTCGTCGACCAT  
CGCCTGTTTCGGCCTCGGTGTACCTGCCTTCGCCAGCTCGGATCTCTTGACACTACA  
AACCGAAGACTCATCTATTCGTGCTATGACACTATTTCTTTCAGATCCTTCTGCTCAC  
CCAATCTCAAAGATGATCTTGATTCAGATGACACCTTGGCGTTTCTTTTTCGGGCAC  
GTGCTTCTTTCAAAGTCGTCAATGGGCTGCTTGTTCATGTCTCTGACACACTACCAC  
ACCTGCGTTTGTGGTGCCTCAGAGCCTAAGGGGGGTGATGCTAACCCATGCCCATGA  
CTCCCCTTGTTCAGGCCACAGAGGTATCAAAGCCACCCTGAAGTCATTACAGGAAGT  
CGCCTACTGGCCACACATGCAGAAAGATGTGTTAGATTACATCAAGGGTTGCTTGGT  
GTGCTGTCAATTCCAACCAGCAAGCACTCTTACCGAGCACCACTACAGCGACGAG  
GTGTCTCATTCCCCTGGTCTGATCTTCAAATCGACTGGGTGGGACCCCTCACAAAAT  
CCACCAGAGGCAACAATACTTTCTCACGGTGGTATGTGCATTACCAAATGGGTGG  
AATGCTTACCTGCACCGAATGACACAGCTCAAACCACCGGTACCTCTTGATGAATC  
ATATCTTCTCGAGGTTTCGGTCTGCCTGGCAGAGTTAACTCTGACAGAGGCACACACT  
TCACGGCTGAAATGATGCAGCAGCTATGGCAGCTGCTGGGTGTGAAAGCCAACTTTT  
ACATCAGTTACCGTCCACAATCGTCAGGACAAGTGGAACGGGCTAACCGAACAGTC  
GTGAACATCCTCAGAAAGTATGTGTCTCAAACCACAAGGATTGGGACGTTAAACTC  
CCCCTTGTCTTGATGGCCATCAGGGCGACACCCACGAGTCAACCGGACTCTCGCCC  
TTCGAGTTGATGACGGGAAGGCAGATGACTCTGCCCTGCACTTGTCTATCAACCG  
GGTGAAGCCAGCATCGCCACGGCTTACACCGCACACCAGTACATGACTGACCTACA  
CCAACACTTGAGTGCCACTTTCGCTTTCGCCAGAAAAATCTGGACAAGAGCGCAG  
AAGGAAGCAAAACCTACTATGACAAAAAGGCATCCCACGATGAACTCCAGGTGGGA  
GATAAAGCGTGGTTTTACATCTTTGCTCAAACCATAGACAACGACAACCACAATGCT  
GGAAAACATGGTTCGTAAGTTCCTGCCCACTGGGCTGGACCTTACGTCATCACACAG  
AAACTCTCCCCTGTGGTATATCAGCTCAAGATTACCAAAGGACAGAAAGAACCTAT  
GCTGAAATGGGTACATCGCAACCAAATTAAGCCACACAAAAACCCCATGGGACTAG  
TCGGGGACTCCAACGTCCAGTTAGGTCATAA

> Loki-Sme consensus sequence Smc-Gag-Pol polyprotein

MEAADSPPPAGFGDPLDHFDSVLTDLVGPPLREFVTEIETDPSRLQEKLSDLVAKAMFG  
QVKEKDKHKILSQMAVIMAAQERHTQKLLNQQEKS NKALLMIEQKDELLVQADENIA  
KLEEKALLQAEKENEEDNREDEL RATLHEKENELQSVHKQLTAAKRLDQSDVLLIK  
AQDKFHDLNATIKDLTSQIERREQHECDLQAKLDDVSLRVSLFKQQHAMKEDELARVR  
RQLQSALDLDPGRQRPGNESPFERKDVRSRENPPRSGLVITPDDSLWSRNLEHSPYRRL  
RSPISEERQSLSPSYRDLDKIARNITRFEPGNKGGFEISLYLKDLEYHLRKFSGATTDDKI

YLIRMTSNRTIGSFIERQPDRVRSYKLLCQRLIDEYSYIHPTGLAAALVIKQERDESPQ  
VYYNRILQAYFGPKNEIGMEDDVNFKVLFIQNLHPTTSHHLGVAACPRTLTSRQLRDLA  
VRGFAKYKQVSVKKPDTNVIFSIDTNNIPLLEGATESIRENPSRPKERPFRDHKPFRRSPA  
SESRREQPHSGFRGNHQPESRRHFSDIRRPKFPQRQWNNWDTRDGQAQEWHQNYRPR  
PRDQPRNPRVRNEFPNQQMRENERSNPPQTYEKGKEEAIHLSEKEVEAIKRLKQQSNK  
GKKADLLAVSLVKPETSPPDQETNVEEEELYRSDDSSQDMVETSIDTEPLKSEDKSVSAV  
LVVSANSTDTNNGQTLEVIQGEPPFQQFLCHLIERGVARKFYLSSTILEDEVEHEALLDTAA  
DVTLMFALFNKLRQVAHQSNRDLKLQPCVMNIQPYNSGNTIIKKLALIKLTLGPMTVIH  
PVYVSPSSIPLLVGKDLLNRFELIDFKRSKIWAQVRSPLPISLPSHDTAHCLVLEGKIDT  
LDGQPTQFTTAEADDDFGTTTDANSGKGWYPSDTLAQQDNFLCAFSNPSGTDEYCPMV  
NQGIHLNDTHVEDVALALWADQTAISQELFNSLTKANPDILFYSGAERFPLQPQSRETMS  
AQQACTLKVRWNHRELHFNFLVVPNLPHPAYIGSDLLVRLDVQIDTINNLLWSLKTVG  
DNTAPDLNLSKSGSIPEACQVANALHVVPANTTNMSIRLNIRPGQRRPHSQVFFQPSL  
LFFHLGLTIQATPLMDLASRSTHLLVQNETRQDILIPKSTPLGWLSTEFHDFELRIPVIGQI  
PPLLSGSNDENVVYTKPAGAITLFPVAVTLTQDTVCRVDLTDSTQMVLTQVQVMSVDSS  
PDPDTYPEAEPSRSTSDTPASTNLDKFTQVDQVVEADALQSDEEREQLRNILLKYEKSF  
AQDSLDCGLTDIHSVRIPTPPAAPPTFVRQYKIPLASYEPVQEIIDDLLHRGHIRPCNSTYSA  
PVWPVLKPNGKWRLTIDYRKLNQVPLSRWPMTQLNQELPKVKDAKYFSSMDIASGF  
WTIPVHIADQHKLAFTRAGRQYTFTRCPFGYANSPAEFNIFLNKSCPDASERGTLIYVDDI  
LIRTPMKGHIDEIEHVLDQLTTAGAKISLSKCQWCKTKVNYVGLLVGNSGVPEPQTNRV  
QGVMNITPTNISELRSFLGVCNYSRQFIPDFADIAKPLTDLLKKDSLFTFGEPQKEAMQS  
LKQLLCTAPCLAYPDYQKEFHLEVGFSHCLSAGLYQVHDSDKRVVAYASKTLAAPEIK  
YTDCEKALLATVWATKHFSNYLGGQRVIVETNHQPVTFLNSQRIRDGVVTNSRVASWL  
MALQSFDMEVRYAQNRKTPLGMELAACQHCSEEPSIDSIVLTDVLPESNHHYFDPNV  
CADMVTAYVDGCSFHETQVRSGAGVLWVHDTPEPQCFQLGSQSSQYAEIAAILITLQ  
LAKENDVKNLTICTDSNYARLSFTSHLPLWIKNGFMSTNRKPVKHKELFIACKQLVDTC  
DMQIYWKKVRGHSRVPGADKDLNDQADKLAKQGAIGTPWQFDGNSVPTQALPTVCA  
VTRSGTTATPDRRSPSPVSASVSPAFASSDLLTLQTEDSSIRAMTLFLSDPSAHPISKDDLD  
SDDTLAFLFRARASFVKVNGLLVHVSDDLTPAFVVPQSLRGVMLTHAHDSPCSGHRGI  
KATLKSLEVAYWPHMQKDVLDYIKGCLVCCQFQPASTLHRAPLQRRGVSPWSDLQI  
DWVGPLTKSTRGNKYFLTVCFTKWVECLPAPNDTAQTTAYLLMNHIFSRFGLPGRV  
NSDRGTHFTAEMMQQLWQLLGVKANFHISYRPQSSGQVERANRTVVNLRKYVSSNHK  
DWDVKLPLVLMAIRATPHESTGLSPFELMTGRQMTLPLHLLYQPGEASIAATYTAHQY  
MTDLHQHLSATFAFAQKNLDKSAEGSKTYDYDKKASHDELQVGDKAWFYIFAQTIDND  
NHNAGKHGRKFLPHWAGPYVITQKLSPVVYQLKITKGQKEPMLKWVHRNQIKPHKNP  
MGLVGDSNPVRS\*

> Loki-Sme consensus sequence *env* gene

TTGACGTTACCCGGCCGAAAAGAATGAATCCGTTGCTGCTCCTCGCGACCTTTTTG  
GTGATGGGTGTCCCGGTCTCTCCAGAGATGGTACAGACGGGACCCCGTCCGGGATT  
GCGCTAACGCCCAATCCCGGACTACTGATCACCAACTGTCGCCTGCACACACAGAA  
GGTGTTTGTGAGGTTCCGCCCGGTGAGGTAATCCAGAAGCATCTCCAAGCGACTGG  
AAGCCTCACCAGTTGGGCTGGAATGACCTGGACCAGGAACGCGATTAAGCACGCTG  
AGGCAGACGTGGCTCATATGCTCCTTCAACTACAGAAATTCACGGTGTCTCAAGATG  
AACTACAGGGAAAGAACAAAAGGCAGAAACGGTTTATCGGAGCCCTACTTACTGCA  
GCCACAGCAGTAGGCTCCCTATTCAGCATCGGACTCTCTCCGTC AATGCCGTCAGC  
CTAGCAACCGTCAAACGTCACATCACAGAGTTAGACGCAGAAATCCCGAAATACA

GTCACGACTACACCTTCAACAACAGTCGCTCCAAACCATAGGAGAACTCTTAAGG  
GAACGGTCTGATTGTGAATACTCAGAGTCTCGCTCTGAACCGAACCATCAGGGCTG  
TAGACTCCCTTCTGACAGTAATGCAGGTGGACTACGCTCACACACAACCTGGTGGACA  
TGCTAATGACAGACATGCTGAGAGAGGGTCGGGTCATCAGTAGACAGTCTAGCTACA  
GGCCAGATTCCCCCTTCTTGTCCCCCTCTCCCTAGTACAGAACCCTCTTAGCCAAAG  
CCACTAAGGAAACCATCACACCCCTACAAGCCCATCTAGCGTATACCCTTGGTAGTG  
CTGTTCCCCTCTACGTCAACCCTGAAAGCGGAGACGTATCCTTCCTCCTCAACCTTCC  
CATAATAGCTTCAGAAAACATTTATCGGCTCAAGAACGTGGTGAATGTGGGATGGT  
GGCAAGGAGATACCCATCTGAAGGTGCAAACACCCACGATGGTGGCCTACCATGAC  
GATAGTCCCGAATTGTATTTGGCACCCAACCTGCGAATGTGCACCCTTACCAAGGAA  
ATCCATTACCTGTGTCCAAGCAAACCATTCGTACGTGACAGTACTAATGGAATTTGT  
GGACTCAAGCCCATGTTGGCAGAACTCGCTGTCCCACAACCTGCCACTTCTCGATCC  
CAGGTCACAGACACCCAAATTGAAATCGTAGGTGATAGATGGCTAGTAAACACTCC  
GTTCAAAGTAGCCACTCTCACTTACGGACAACATGACACTGCTACACGGGTTCCCCT  
CCCAGAGGAGACGTTATGGATTACCGTCCCTGAAAACGCTATCCTCCACATTGACGA  
CATGGCCATCTACTATCTAAACTCCGAACAATACGAGACTGACATTGAACTTCCCGA  
TTTCTTCAAAAACCTACCAAGTAAAAATCGACCCCAACGCTATCGCTCAAATACAATA  
TGTAGGAACCCAAACTATTGACCTAACACCACTTAACGACATCTTACAGATCACTAC  
ACCATCAGAAAGACCACCATAACAACCGTTAAACTACACATGGTCCACCCCCGACA  
CCTTACTCGCCCTTACCATAGGACTCGGGTATGTGTTAACGTTTGCCATAGCCTTCAT  
ATGTGCTAGACGTACTCGAGCCCTCCAGAGGCAACTAAACAAGTGTTCCACTAGTAT  
GTCCAAACTGCGTAAACACCACGGCAGGAGTAGAACCCTGAAAGGGATGACGAA  
GACGAAGATGTCGTCTACCAAATCTCTCCTACTCTTATAGAGCTAGAATCCGAAACC  
TCCGTGCCCATTTAG

>Loki-Sme consensus sequence Env protein

LTFTRPKRMNPLLLLATFLVMGVVSPPEMVQTPPSGIALTPNPGLLITNCR LHQKVFV  
RFRPREVLQKHLQATGSLTSWAGMTWTRNAIKHAEADV AHMLLQLQKFTVSDDELQG  
KNKRQKRFIGALLTAATAVGSLSIGLSSVNAVSLATVKRHITELDAEIQSRLHLQQQ  
SLQTIGETLKGTVLIVNTQSLALNRTIRAVDSLLTVMQVDYAHTQLVDMLMTDMLREV  
GSSVDSLATGQIPFLVPLSLVQNLLAKATKETITPLQAHLAYTLGSAVPLYVNPESGDV  
SFLNLPIIASENIYRLKNVVNVGWQGDTHLKVQTPTMVAYHDDSPELYLAPNLRMC  
TLKEIHLYCPSKPFVRDSTNGICGLKPM LAETRCPTTATSRSQVTD TQIEIVGDRWL VNT  
PFKVATLTYGQHDTATR VPLPEETLWITVPENAILHIDDMAIYYLNSEQYETDIELP DFFK  
NYQVKIDPNIAIAQIQYVGTQTIDL TPLNDILQITTPSERPPIQPLNYTWSTPD TLLALTIGL  
GYVLTFAIAFICARRTRALQRQLNKCSTSMSKLRKHHGRSRTTERDDEDV VYQISPTL  
IELESETSVPI\*

>Loki-Lca consensus sequence

TTTACATAACATTTGATACTTTGCTGGGTTATTTAATTTTAGTGTGTTTCTTTCTCTC  
CCTAAGCCTGCTCACTTCTTTTTGTACTAATTGACATGTACATTTTGTCTCTAACCCCT  
CCCTCTCGCTGCCTCCGCCCCCTCTGTCTATTTAAGGCCACCCACAGAGACGATC  
ACCCCTCTCTGTACCTGTGTTGCCCGCTCTGTGTATCTGTCTGCTTATATGTCTGTCTA  
TACATTTTTCTGGTTAGATTGTATGTCGCTATTTCAATTATACCTGATGATGATTGCTT  
GTGTTGCAATCGAAACGTCGTATGCTATTATTTAATTTATTATTTTTCTTTATACGTG  
ACTTTACCGAAAGAACCAAGAATAATTCCTGCAGTCACGAAAGCTCCAAAGTTAA  
GATTGACCCACCGCCAACCACAACAATGGATCTAGGGACGAGGCAAGAGTAAGCT  
GGCACCCGCGACAACCACCACCAGGGAATGCCGACACAAGCGAATCCTGGAACAAC

CACGGGGGGTGGAGAGCGAACGATGGACCACCCACACCCCGGGGAGGCCGACGCC  
CACCAAACCAATCACCATAACCGCCTCCCCTGCGGTCTCCACTAGCCATAGAGCATA  
GACCATACCAACCAACTGGAATCGATATGCTCACCACATCCGGATGGAAAGGGAA  
CCCCTAGAGAATAGGAAGACTCCCATGCAAACAGCAAAGGCAAGGACATCAACAG  
AACACACGCAGGAAGAGGACGCACCCAACGCAAAGATAGCCCAAGTGAACATCGG  
AAGCTCAAGAAACCCCGAAGCAGCCACTGAGGTGATACCCGAGGGTAGAGGCTACC  
ATCTGGGAGAACTAATTCCTGTAGGACCGGTCCGACGAGTCCACCTGGAAGTAAGA  
CTGCAAGACACTCTGACCAGCCAGGGCCTGTGTGATACCCGAGCAGAAATATCAAT  
GATTTCCGATCACCTATTTGGTGAACCTCAGACTGCCCTCCAGCGGAAAAATGAAGC  
ACTACAGATGATGCCAAGTAAGCTTACCTACTCAGGATGCGAAGGGACCCACATGC  
GACCTTTGGGCAAAGTCATGATGAAGCTCACGTTCAACGGGATCAACATGAACCAT  
CCACTATATGTCGTACAATACCCAGGAAAAGAGCTGATCATTGGGATCGAACTACTG  
AATCGGCTAAAACCCATTGTGAACCTTGGATCCCGACAAATCTGGGCACAATCAATA  
CCGGAATGGCATAGAGATCCAGAGGACGAAGAAGAAGAACGAAGCCCCACGGGAA  
CCCAAGTGCTAGCACAAGAACTCAACGACCTGTCACCCGACAATCAAAGACAAAAAC  
AAGATTCCGGCTGAAATACGAACCACTCAACTAATGACCAACGGACGGGGAAAGGA  
CCTTGACGAAGCCGACCTACGGCCGGTTTTTCCGAAGGACCATCACTCCAGAGAGTA  
TCGACAGCCCACTAGTGGCCAAACAGGTGAACAGGAAACAAAGGGAGAGCCCAAG  
GGCAAGAGCTCATCCCCTTCGAGTGAAGCAACGGCGATCCAACCACCACTAACGCA  
AGGAAAACACCAAACCTGAGCCGCCCGAAACCACGAAGGCCCTAGATCCAAACCAA  
GAGAAAAGAGTCCTCACAATAGAAGAACAATAGAACAACAATTGAAGCAGCAG  
ACGCCCTAGAGAATGACACTCAACGAGACGAGCTACGACAACCTGCTCCAAAAATAC  
AACTCCCTGTTCTCCGAAGACTCCTATGATTGTGGCAAAACCGACCTACATGTGGTA  
TCCATTCCCACACTGGAGGGGGCACCAGCGGTATACGTGAAACAATACAAGATTCC  
ACTGGCCGCCTATGAATCGATCCAAGAAACCCTGGAGAACCTACTCAAAAAGAACA  
TAATCCGGGAATGCAACTCGACCTACAACCTCGCCATTTGGCCAGTACTAAAACCCA  
CGGGAAAATGGAGACTCACCATCGACTACCGGCAACTCAATAAAACAGTTCCCCTA  
TCTCGATGGCCAATGGCAGAAATCGACCACGGTCTCAACCAAATAAAAAGGCGCAAA  
GGTACTCACCACAATGGACCTAGCAAATGGCTTCTGGACCATGCCAGTAAAAGAAA  
CCGATCAATAACAAGTTGGCCTTCACCTTCGACAGAATACAGTATACTTGGAATCGCT  
GCCCCGTTCCGATACTCGAACTCACCTGCAGACTTCAACATATTCTACACAAGGCGA  
TGGGCGACGCAAAAGAGCGAGGCACCATCGTCTACGTCGACGACATACTAGTCAAG  
GACTCCTCATGGCAAGAACATCTCAAGAGCCTCCAACATAACCCTTGAACAATTTAAA  
GGAAGCAGGAGCAAAAATCTCAATACAAAAGGGCAGTGGGCACGAAAAAGGGTT  
GACTATCTTGGGTTTCAGATTGGCACTGAGGGATTGCTACCCCAAACAACAGAATT  
GAAGCCCTCCTCGCACTCAAGTCGCCAACACAGTCCCAGCCCTCCGGAGTTTCTTG  
GGAATCTGCAACTACCTCCGACAGTTTCGTGGACGACTATGCAGGGATCACTCGACCC  
TTAGTCAAACCTACTACAAAAGGACGAGCCATGGGAGTGGGGACCAGAACAGGAAG  
CTGCAGAAAAAGAATTGAAACAACAGATCACAAGAGCATCCTGCCTAGCATATCCC  
GAGAAAGGAAAGGAATACTACCTAGAGACTGCCTACTCAGACCACAGTATCAGCTC  
GGTACTGTACCAGAGACAAGAGGCAGAGAAACAAATTATTGCCTATGCCAGTAAAG  
CACTCCGGGGAGTAGAGACAAAGTTCTCCGAATGTGAGAAGGCAATATTCGGAAAC  
ATCTGGGCTATAACAACATTTTCGGAACCTTGTGAATGGGGAAAAGATCATCTTGAA  
ACAAATCATGAATCCTTGGCGTATCTCAACAGCAAGAAGATTCGGGAGGGCCGCGT  
GACCAGCAGCCGAATAGCCAATTGGGCACTGACCCTCCAAGGTTTACCAATCACAG  
TAAAATACGCGAAAAATAAGAAAAGCCCAGTAGCCCAAGGACTTGCCGATCTACAT

GATTGCACCCTAGACAGCGTAGGAGCACATGACGTAGGGGTACCTCCCGAGGACAG  
CCGGCACCTTCCCTTTGACAAAGAAACATGTGCCAACATACCAAGGGTGTACATCG  
ATGGATGCGCCAAAATGAAAGAAAACAAGCTCCACGCTGGAGCAGGAATCATGTGG  
GAATCCGGACCACTCACAGGCATCCAAGAGGGGTTCCAGCTGGGACCGAAGTCAA  
CCAGTATGCAGAGCTGGCTGGGGTACACATTGCCCTCAAATGGCAGCCGATAACA  
AGATACAGACCATGGTGGTGTGCACCGATTCTGACTACGTACAATACAGCTTCCTAA  
ACCACCTACCCATATGGAGGAAAAATGGCATGAAGAACCATAGGAATAGACCGATC  
CACCATCGAGAACTGTTTCGAGGCCATAGACACTATGATCCAGCAGAACGACATGAA  
GATATTTTGGAGGAAAGTAAAAGGGCACTCCAAGATACCAGGCCAGGAGAAGGCG  
GGGAACGACCGAGCAGACGCCCTAGCAAACTAGGAAGCCTGGAAGGCACCCCAT  
GGAAGCTAGAAGACCAACCCAAACCTAACAGACTAGAAGAGCCGACGAACTCGGA  
CTCTGTCGTTATAGGGTTGGTCACAAGAAGCGGAAAGAACTCAGCAGAACTGGGA  
CCAGAGCTCACTTGAGCAATACACAGCCTCCCGAAGACCTGATCAGAATGCAACAA  
GAGGACGAAACAATAAAGACACTAGCCGACCATATCCAGGATCCGACAGGAAAAC  
CAATCACGACAGACAACCTTGGACAACAACAAGGAACTCGAGACCATGCATAACCAA  
GTCAGAAGATTTTCAATGCGGAAAGGGCTACTGGTATACACAAACGAAAAGACGG  
TAAAACCAGATGGGTAGTTCCTTCGCAATATCGAGACACAATGCTACAACACGCCC  
ACAATGAACCATGTAGCGGACATCGGTGCGAGATGAACACAGGACAGATGTTGCGA  
CAGGTGGCCTACTGGCCCAAATGGGTGAAGACGTACACAAGCATGTGTCCAACCTG  
CCTCGTGTGTTGCAAATACCAGCCAACGAACTCACAAACCCGAGCACCCCTACAGA  
AAAGGGGAACAGACTTCCCTTGGTCTAACCTACAAATCGACTGGATAGGACCTGTC  
AACAGATCAACCAAAGGAAACAAATACATGCTGACCGTAACCTGTGCCTTTTCCAA  
GTGGGTGGAGTGCTTACCAGCCCCAACAACACCGCGGAGACGACAGCTACCCTAC  
TGGTCAACCAGATATTCAGTAGATGGGGCCTACCGTCAACCATCGATTCAGACAAA  
GGAAGCCACTTCACAGCCGATGTAATTGCAGAAGTGTGGAAGACATTGGGAGTAAA  
AAGACAACACTACATGTTCGCATACCACCCACAATCCTCAGGACAGGTGGAAAGAGCCA  
ACAGGACCAATTGTGAGCCTCCTAAAAAATATGTGTCCACTACCGGATGCGACTGG  
GACACAAAACACTACCCTAGTATTGATGGCCATTAGAGCCACCCCAACCGGGCGAC  
AGGCAGGACACCCTTCGAGATCATGACCGGAAGACAAATGACCCTCCCAGTACACC  
TGCTATACGTTCCAGCGGAGGACGAGATCACGACGGCAATGACACCGACTGAATAC  
ATAACCGGATTGAACAGCCACCTACAGAACACGTTTCGCGATGGTCAGAGACAAATT  
GCAAGCCGAGGCTCAAGGGAGCAAAGCATACTACGACCAAAAAGCTAGCCATGCA  
GAATATCAGCTAGGAGACCAGGTGTTGTACCTCAATTACGAGAAAAGAAAACAAAA  
ATGCAGGAAATTCCTCCCTTCCCTGGACAGGACCATATGAGATTGTTGACAAAATATC  
CCCAGTCGTGTACCAATTA AAAAATTACAAAGACAGGAAGAGAGCAGCAATACAAGT  
GGGTACACATCAACCAAATCAAGTTGTACCCTGTGCAGATGGAACCAGGGAAGTAA  
ATGTAACGGTACAATAGAGGGGGGGAAGAACTAAGGAGTGGGGATATCACATTA  
AAACCACGTATAAATGTTTTCCAGGAAATGGCAGCCCTCCTGCTCACGCTCCTGCTA  
ACGTGCATCGCCAAGCTAGAAGGCAGCCAAGACCTACTCAAGCCAGGACCAGAATC  
CGGGGTGATGCTGAGAGATTCTTCCGGTTTCCTAGTAACTGAAACAAAATAGTAAC  
CCAACAAGTCTATGTTTCATTAGAACCTGCCATGACAGTAGAGAGACATTTCCGGAA  
GTTACCATCCTCGACCACCGCAGAAACCCGAATTTGGTACCATGGCTTCCTAAAATA  
CAGCGAACTGAATATCAGAACGATCCTGGAGCAATTACAGAGAACCATGATACTTC  
CCCCGCCACGTTTCGACACCACACGGACCAAGAGATCGATCGGCCTGGGAGTGGCC  
TTCGGAGTCCGTCCGGCTTTAGCTCCTTAATCACATTAGGAGTATCTATATCCAACG  
CCGTGAAAATTGGACACCTCACGCAAGGCATCGAAAACCTACAGCTCGATATGCAT

CAAATCCGCCTACAAATCCATCACCAACAAAAAACTTGATCGAAATGGGTTCAC  
CCTTAGAGACACCATAGTTCTGGTCAACCTACATTCAGCCATGTTGAACTTAACCAT  
CCAAGAACTGGGGCGTACACTTCGAGAACTATACGACGACGAAAATCTTCGACAAC  
CAATCCAATGGGTAATCCAAGACTTGTTGCGTAGCATCAGCGGAAGCATCAGTGATC  
TAATCCAAGGTCAAATTCCCTCGTATCTGGTAACTCCGACGCTGATACAAAACGTGC  
TACAAACAGCCTCCCTAGAAAGAATCAGTCCAACACAAGTACAAATTGCATTTAAC  
ATGGGTACAGCCACACCTATATATGTGAACCCCCAAACCAGACAACCTGGCGTTCCTG  
TTAAACTTGCCACTAGTCAAACCCGAACAGGTATACCGATTACGAACAGTATTAAC  
GTGGGTACATGGAGAAATGACATTTACTCCAAGATGGAGACACCCTCCGTAATAGC  
CTACCAAGAAGAAAGCCCCCTTAAATACCTAGTGCCCGACCTAACCATGTGCCAAA  
TAATGAAAGACGTCCATTGGCTCTGCCAGGCAAACCCTTCCTAATCAATACAGCTG  
AAATAATGTGCGGCCTGGCGACCCAAAGCTCCAGAGAGACCTGCAAGTTCAAACTA  
AGTAAACCTAAAGAAAGAACCGAAACAGTGGCCATGATAGCTGATGCCAGTGGCT  
AGTCAGCACGCCTCTGGATACAGCAACCATTTCCACCGATCGACATTCGGTTACCAT  
GAAAGTTCGATACCAAGCCCTGTCTGTGCTAGTCACGGTACCAAAGGAACGTTCTG  
ACACATAGGGGATAAAGTATTATATAATTTAGACAAAGGCCTACATCAAGCAGATG  
TAGAAACAGTAAACATATTCAGGAGCCACAAGTTTGAAATAAGCAACGCCCTGTCTG  
AACCTATTAACAGCAAAGAATTCACACCCGTGAGACTAGCCATCAGTGATTGAGA  
AATTAACGTAACCTGACCTCACCTGGGCAACCGATGAATCCGGACACCAGCGGAATC  
AACAGATGGGACTGGGAATCACCGGAGCAACTGGAATGATCATACTAGCCATGGCT  
ATCCTAACCCCTAGCATACCACGTGTCCAAGATGAATGCCAAGCTTAAAAGACTAATC  
GCAGGCACAAAGCACATACCGTTCGAGGCCAGGAACAAAGGAGGAACCAAGGCCT  
AA

> Loki-Lca consensus sequence *pol* gene

CTGCCGTCTCCACTAGCCATAGAGCATAGACCATCACCAACCAACTGGAATCGATAT  
GCTCACCACATCCGGATGGAAAGGGAACCCCTAGAGAATAGGAAGACTCCCATGCA  
AACAGCAAAGGCAAGGACATCAACAGAACACACGCAGGAAGAGGACGCACCCAAC  
GCAAAGATAGCCCAAGTGAACATCGGAAGCTCAAGAAACCCCGAAGCAGCCACTG  
AGGTGATACCCGAGGGTAGAGGCTACCATCTGGGAGAATAATTCCTGTAGGACCG  
GTCGGACGAGTCCACCTGGAAGTAAGACTGCAAGACACTCTGACCAGCCAGGGCCT  
GTGTGATACCGGAGCAGAAATATCAATGATTTCCGATCACCTATTTGGTGAACCTCA  
GACTGCCCTCCAGCGGAAAAATGAAGCACTACAGATGATGCCAAGTAAGCTTACCT  
ACTCAGGATGCGAAGGGACCCACATGCGACCTTTGGGCAAAGTCATGATGAAGCTC  
ACGTTCAACGGGATCAACATGAACCATCCACTATATGTCGTACAATACCCAGGAAA  
AGAGCTGATCATTGGGATCGAACTACTGAATCGGCTAAAACCCATTGTGAACCTTGG  
ATCCCGACAAATCTGGGCACAATCAATACCGGAATGGCATAGAGATCCAGAGGACG  
AAGAAGAAGAACGAAGCCCCACGGGAACCCAAGTGCTAGCACAAGAACTCAACGA  
CCTGTCACCGACAATCAAAGACAAAACAAGATTCCGGCTGAAATACGAACCACTC  
AACTAATGACCAACGGACGGGGAAAGGACCTTGACGAAGCCGACCTACGGCCGGTT  
TTTCCGAAGGACCATCACTCCAGAGAGTATCGACAGCCCACTAGTGGCCAAACAGG  
TGAACAGGAAACAAAGGGAGAGCCCAAGGGCAAGAGCTCATCCCCTTCGAGTGAA  
GCAACGGCGATCCAACCACCTAACGCAAGGAAAACACCAAACCTGAGCCGCCCGA  
AACCACGAAGGCCCTAGATCCAAACCAAGAGAAAAGAGTCCTCACAATAGAAGAA  
CAAATAGAACAAACAATTGAAGCAGCAGACGCCCTAGAGAATGACTCAACGAG  
ACGAGCTACGACAACCTGCTCCAAAATACAACCTCCCTGTTCTCCGAAGACTCCTATG  
ATTGTGGCAAACCGACCTACATGTGGTATCCATTCCACACTGGAGGGGGCACCA

GCGGTATACGTGAAACAATACAAGATTCCACTGGCCGCCTATGAATCGATCCAAGA  
AACCTGGAGAACCTACTCAAAAAGAACATAATCCGGGAATGCAACTCGACCTACA  
ACTCGCCCATTTGGCCAGTACTAAAACCCACGGGAAAATGGAGACTCACCATCGAC  
TACCGGCAACTCAATAAAAACAGTTCCCCTATCTCGATGGCCAATGGCAGAAATCGA  
CCACGGTCTCAACCAAATAAAAAGGCGCAAAGGTACTCACCACAATGGACCTAGCAA  
ATGGCTTCTGGACCATGCCAGTAAAAGAAACCGATCAATACAAGTTGGCCTTCACCT  
TCGACAGAATACAGTATACTTGGAAATCGCTGCCCGTTCCGATACTCGAACTCACCTG  
CAGACTTCAACATATTCCTACACAAGGCGATGGGCGACGCAAAGAGCGAGGCACC  
ATCGTCTACGTGACGACATACTAGTCAAGGACTCCTCATGGCAAGAACATCTCAAG  
AGCCTCCAACATACCCTTGAACAATTAAGGAAGCAGGAGCAAAAATCTCAATACA  
AAAAGGGCAGTGGGCACGAAAAGGGTTGACTATCTTGGGTTTCAGATTGGCACTG  
AGGGATTGCTACCCCAAACAACAGAATTGAAGCCCTCCTCGCACTCAAGTCGCCC  
AACACAGTCCCGACCCTCCGGAGTTTCTTGGGAATCTGCAACTACCTCCGACAGTTC  
GTGGACGACTATGCAGGGATCACTCGACCCTTAGTCAAATACTACAAAAGGACGA  
GCCATGGGAGTGGGGACCAGAACAGGAAGCTGCAGAAAAGAATTGAAACAACAG  
ATCACAAGAGCATCCTGCCTAGCATATCCCGAGAAAGGAAAGGAATACTACCTAGA  
GACTGCCTACTCAGACCACAGTATCAGCTCGGTACTGTACCAGAGACAAGAGGCAG  
AGAAACAAATTATTGCCTATGCCAGTAAAGCACTCCGGGGAGTAGAGACAAAGTTC  
TCCGAATGTGAGAAGGCAATATTCGGAAACATCTGGGCTATACAACATTTTCGGAAC  
TTGTTGAATGGGGAAAAGATCATCTTGGAAACAAATCATGAATCCTTGGCGTATCTC  
AACAGCAAGAAGATTTCGGGAGGGGCCGCGTGACCAGCAGCCGAATAGCCAATTGGG  
CACTGACCCTCCAAGGTTTACCAATCACAGTAAAATACGCGAAAAATAAGAAAAGC  
CCAGTAGCCCAAGGACTTGCCGATCTACATGATTGCACCCTAGACAGCGTAGGAGC  
ACATGACGTAGGGGTACCTCCCGAGGACAGCCGGCACCTTCCCTTTGACAAAGAAA  
CATGTGCCAACATACCAAGGGTGTACATCGATGGATGCGCCAAAATGAAAGAAAAC  
AAGCTCCACGCTGGAGCAGGAATCATGTGGGAATCCGGACCACTCACAGGCATCCA  
AGAGGGGTTCCAGCTGGGACCGAAGTCAAACCAGTATGCAGAGCTGGCTGGGGTAC  
ACATTGCCCTCAAATGGCAGCCGATAACAAGATACAGACCATGGTGGTGTGCACC  
GATTCTGACTACGTACAATACAGCTTCCCTAAACCACCTACCCATATGGAGGAAAAT  
GGCATGAAGAACCATAGGAATAGACCGATCCACCATCGAGAACTGTTTCGAGGCCAT  
AGACACTATGATCCAGCAGAACGACATGAAGATATTTTGGAGGAAAGTAAAAGGGC  
ACTCCAAGATACCAGGCCAGGAGAAGGCGGGGAACGACCCGAGCAGACGCCCTAGC  
AAAATAAGGAAGCCTGGAAGGCACCCCATGGAAGCTAGAAGACCAACCCAAACCT  
AACAGACTAGAAGAGCCGACGAACCTCGGACTCTGTCTGTTATAGGGTTGGTCAACAG  
AAGCGGAAAGAACTCAGCAGAACTGGGACCAGAGCTCACTTGAGCAATACACAG  
CCTCCCGAAGACCTGATCAGAATGCAACAAGAGGACGAAACAATAAAGACACTAGC  
CGACCATATCCAGGATCCGACAGGAAAACCAATCACGACAGACAACCTTGGACAACA  
ACAAGGAACTCGAGACCATGCATAACCAAGTCAGAAGATTTTCAATGCGGAAAGGG  
CTACTGGTATACACAAACGAAAAAGACGGTAAAACCAGATGGGTAGTTCCTTCGCA  
ATATCGAGACACAATGCTACAACACGCCACAATGAACCATGTAGCGGACATCGGT  
GCGAGATGAACACAGGACAGATGTTGCGACAGGTGGCCTACTGGCCAAAATGGGT  
GAAGACGTACACAAGCATGTGTCCAACCTGCCTCGTGTGTTGCAAATACCAGCCAAC  
GAACTCACAACACCGAGCACCCCTACAGAAAAGGGGAACAGACTTCCCTTGGTCTA  
ACCTACAAATCGACTGGATAGGACCTGTCAACAGATCAACCAAAGGAAACAATAAC  
ATGCTGACCGTAACCTGTGCCTTTTCCAAGTGGGTGGAGTGCTTACCAGCCCCAAC  
AACACCGCGGAGACGACAGCTACCCTACTGGTCAACCAGATATTCAGTAGATGGGG

CCTACCGTCAACCATCGATTGAGACAAAGGAAGCCACTTCACAGCCGATGTAATTGC  
AGAAGTGTGGAAGACATTGGGAGTAAAAAGACAACACTACATGTCGCATACCACCCAC  
AATCCTCAGGACAGGTGGAAAGAGCCAACAGGACCATTGTGAGCCTCCTAAAAAAA  
TATGTGTCCACTACCGGATGCGACTGGGACACAAAACCTACCCCTAGTATTGATGGCC  
ATTAGAGCCACCCCAACCGGGCGACAGGCAGGACACCCTTCGAGATCATGACCGG  
AAGACAAATGACCCTCCCAGTACACCTGCTATACGTTCCAGCGGAGGACGAGATCA  
CGACGGCAATGACACCGACTGAATACATAACCGGATTGAACAGCCACCTACAGAAC  
ACGTTTCGCGATGGTCAGAGACAAATTGCAAGCCGAGGCTCAAGGGAGCAAAGCATA  
CTACGACCAAAAAGCTAGCCATGCAGAATATCAGCTAGGAGACCAGGTGTTGTACC  
TCAATTACGAGAAAAGAAAACAAAATGCAGGAAATTCCTCCCTTCCTGGACAGGA  
CCATATGAGATTGTTGACAAAATATCCCCAGTCGTGTACCAATTA AAAATTACAAAG  
ACAGGAAGAGAGCAGCAATAACAAGTGGGTACACATCAACCAAATCAAGTTGTACCC  
TGTGCAGATGGAACCAGGGAAGTAA

> Loki-Lca consensus sequence Pol protein

LPSPLAIEHRPSPTNWNRYAHHIRMEREPLENRKTPMQTAKARTSTEHTQEEDAPNAKIA  
QVNIGSSRNPEAATEVIPEGRGYHLGELIPVGPVGRVHLEVRLQDTLTSQGLCDTGAEIS  
MISDHLFGELQ TALQRKNEALQMMP SKLTYSGCEGTHMRPLGKVMMLTFNGINMNH  
PLYVVQYPGKELIIGIELLNRLKPIVNLGSRQIWAQSIPEWHRDPEDEEEERSPTGTQVLA  
QELNDLSPTIKDKNKIPAEIRTTQLMTNNGRDKDLDEADLRPVFPKDHHSREYRQPTSGQT  
GEQETKGE PKGKSSSPSEATAIQPPLTQGKHQTEPPETTKALDPNQEKRVL TIEEQIEQQI  
EAADALENDTQRDEL RQLLQKYNLSLSEDSYDCGKTDLHVVS IPTLEGAPAVYVKQYKI  
PLAAYESIQETLENLLKKNIRECNSTYNSPIWPVLKPTGKWRLTIDYRQLNKTVPLSRWP  
MAEIDHGLNQIKGAKVLT TMDLANGFWTMPVKETDQYKLAFTFDRIQYTWNRCPFGYS  
NSPADFNIFLHKAMGDAKERGTIVYVDDILVKDSSWQEHLKSLQHTLEQLKEAGAKISI  
QKGQWARKRVDYLGFIQTEGLLPQTNRIEALLALKSPNTVPTLRSFLGICNYLRQFVD  
DYAGITRPLVKLLQKDEPWEWGPEQEA AEKELKQQITRASCLAYPEKGKEYYLETAYS  
DHSISSVLYQRQEA EKQIIAYASKALRGVETKFSECEKAIFGNIWAIQHFRNLLNGEKIILE  
TNHESLAYLNSKKIREGRVTSSRIANWALTLOGLPITVKYAKNKKSPVAQGLADLHDCT  
LDSVGAHDVGVPPEDSRHLPFDKETCANIPRVYIDGCAKMKENKLHAGAGIMWESGPL  
TGIQEGFQLGPKSNQYAELAGVHIALQMAADNKIQT MVVCTDSYVQYSFLNHLPIWR  
KNGMKNHRNRPIHHRELFEAIDTMIQQNDMKIFWRKVKGHSKIPGQEKAGNDRADALA  
KLGSLGTPWKLEDQPKPNRLEEPTNSDSV VIGLVTRSGKNSAETGTRAHLSNTQPPEDL  
IRMQQEDET IKTLADHIQDPTGKPITTDNLDNNKELETMHNQVRRFSMRKGLLVYTNEK  
DGKTRWVVPSQYRDTMLQH AHNEPCSGHRCEMNTGQMLRQVAYWPKMGEDVHKHV  
SNCLVCCKYQPTNSQHRAPLQKRGTDFPWSNLQIDWIGPVNRSTKGNKYMLTVTCAFS  
KWVECLPAPNNTAETTATLLVNQIFSRWGLPSTIDSDKGSHTADVIAEVWKT LGVKRQ  
LHVAYHPQSSGQVERANRTIVSLLKKYVSTTGCDWDTKLPLVLMAIRATPNRATGRTPF  
EIMTGRQMTLPVHLLYVPAEDEITTAMPT EYITGLNSHLQNTFAMVRDKLQAEAQGSK  
AYYDQKASHAEYQLGDQVLYLNYEK RKQKCRKFLPSWTGPYEIVDKISPVVYQLKITK  
TGREQQYKVVHINQIKLYPVQMEPGK\*

> Loki-Lca consensus sequence *env* gene

CTGTGCAGATGGAACCAGGGAAGTAAATGTAACGGTACAATAGAGGGGGGGGAAGA  
AACTAAGGAGTGGGGATATCACATTA AAAACCACGTATAAATGTTTTCCAGGAAATG  
GCAGCCCTCCTGCTCACGCTCCTGCTAACGTGCATCGCCAAGCTAGAAGGCAGCCAA  
GACCTACTCAAGCCAGGACCAGAATCCGGGGTGATGCTGAGAGATTCTTCCGGTTTC  
CTAGTAACTGAAACAAAATAGTAACCAACAAGTCTATGTTTCATTAGAACCTGCC



ATGACAGTAGAGAGACATTTTCGGGAAGTTACCATCCTCGACCACCGCAGAAACCCG  
AATTTGGTACCATGGCTTCCTAAAATACAGCGAACTGAATATCAGAACGATCCTGGA  
GCAATTACAGAGAACCATGATACTTCCCCCGCCACGTTTCGACACCACACGGACCA  
AGAGATCGATCGGCCTGGGAGTGGCCTTCGGAGTCCTGTCCGGCTTTAGCTCCTTAA  
TCACATTAGGAGTATCTATATCCAACGCCGTGAAAATTGGACACCTCACGCAAGGCA  
TCGAAAACCTACAGCTCGATATGCATCAAATCCGCCTACAAATCCATCACCAACAA  
AAAAACTTGATCGAAATGGGTTCACCCTTAGAGACACCATAGTTCTGGTCAACCTA  
CATTACGCCATGTTGAACTTAACCATCCAAGAAGTGGGGCGTACACTTCGAGAACTA  
TACGACGACGAAAATCTTCGACAACCAATCCAATGGGTAATCCAAGACTTGTTGCGT  
AGCATCAGCGGAAGCATCAGTGATCTAATCCAAGGTCAAATTCCTCGTATCTGGTA  
ACTCCGACGCTGATACAAAACGTGCTACAAAACAGCCTCCCTAGAAAGAATCAGTCC  
AACACAAGTACAAATTGCATTTAACATGGGTACAGCCACACCTATATATGTGAACCC  
CCAAACCAGACAACCTGGCGTTCCTGTTAACTTGCCACTAGTCAAACCCGAACAGGT  
ATACCGATTACGAACAGTATTAACGTGGGTACATGGAGAAATGACATTTACTCCA  
AGATGGAGACACCCTCCGTAATAGCCTACCAAGAAGAAAGCCCCCTTAAATACCTA  
GTGCCCGACCTAACCATGTGCCAAATAATGAAAGACGTCCATTGGCTCTGCCCAGGC  
AAACCCTTCCTAATCAATACAGCTGAAATAATGTGCGGCCTGGCGACCCAAAGCTCC  
AGAGAGACCTGCAAGTTCAACTAAGTAAACCTAAAGAAAGAACCGAAACAGTGG  
CCATGATAGCTGATGCCCAGTGGCTAGTCAGCACGCCTCTGGATACAGCAACCATTT  
CCACCGATCGACATTCCGTTACCATGAAAGTTCGGATACCAAGCCCTGTCGTGCTAG  
TCACGGTACCAAAAGGAACGTTTCGTACACATAGGGGATAAAGTATTATATAATTTA  
GACAAAGGCCTACATCAAGCAGATGTAGAAACAGTAAACATATTCAGGAGCCACAA  
GTTTGAATAAAGCAACGCCCTGTCGAACCTATTAACAGCAAAGAATTCCACACCGT  
GAGACTAGCCATCAGTGATTCAGAAATTAACGTAACCTGACCTCACCTGGGCAACCG  
ATGAATCCGGACACCAGCGGAATCAACAGATGGGACTGGGAATCACCGGAGCAACT  
GGAATGATCATACTAGCCATGGCTATCCTAACCCCTAGCATAACCACGTGTCCAAGATG  
AATGCCAAGCTTAAAAGACTAATCGCAGGCACAAAGCACATACCGTTCGAGCCCAG  
GAACAAAGGAGGAACCAAGGCCTAA

> Loki-Lca consensus sequence Env protein

LCRWNQGSKCNGTIEGGKKLRSGDITLKPRINVFQEMAALLLTLTLCIAKLEGSQDLLK  
PGPESGVMLRDSSGFLVTETKIVTQQVYVSLEPAMTVERHFGKLPSTTAETRIWYHGFL  
KyselNIRTILEQLQRTMILPPATFDTRTRKRSIGLGVAFGVLSGFSSLITLGVSSISNAVKIG  
HLTQGIENLQLDMHQIRLQIHQQKNLIEMGSTLRDTIVLVNLHSAMLNLTIQELGRTLR  
ELYDDENLRQPIQWVIQDLLRSISGSISDLIQGQIPSYLVTPTLIQNVLQTASLERISPTQVQ  
IAFNMGTATPIYVNPQTRQLAFLNLPVKPEQVYRLRVTLVNVTWRNDIYSKMETPSVI  
AYQESPLKYLVPDLTMCQIMKDVHWLCPGKPFINTAEIMCGLATQSSRETCKFKLSK  
PKERTETVAMIADAQWLVSPLDSTATISTDRHSVTMKVPIPSVVLVTVPKGTFVHIGDK  
VLYNLDKGLHQADVETVNIFRSHKFEISNALSNNLSKEFHTVRLAISDSEINVTDLTWA  
TDESGHQRNQMQMLGITGATGMILAMAILTLAYHVSKMNAKLRRLIAGTKHIPFEPRN  
KGGTKA\*

>Loki-Pma consensus sequence

ATGGACAAAGCGCTCGTGAGAATTCCCTATTTTCGATCCACACAACAAGAACAGGGA  
TATACACACTCACATAGCTACAGTAGGACAGGAGGCTAAGATCCGGGGTCTGGGTA  
AATCAGCAGAAAAAGCATGTTTATTATCAAGGAGCTTACATGAATCCGCCAGACCA  
TGGGTAACCTCCCTGCCAAATAGGGTCAAGAGCGATTTCAAGCAATTAAGCCGAGC  
AGTAGTTAAGAGATTTGGGGAATACTCCACACTATCTGAAGGATTGAACGCGGCAA

AATTGATGACTCAGCGTGCAGACGAAGACCCACGAGATTATCTCCTACGCCTCAAG  
AGAGCATATTACGCAGGTGACGTGGACAACGCCAGGAAGAAGGGAAAATATTA  
AAGTTATGTTCTTCCAATCACTAAGACCTGAAATAATGAGGATAGTAGGAATGATGC  
TGGACCCCGAGACTGCCTCCCTGCGCCAGATTGAAAGCAAGGCCACACGGCCTGG  
GTGAACGGACGGAGAACCACTAGCATAGCCAAAACACACATCATCACCAAAGATAA  
AGAACGCCTCGATCTGGAGGGAAGCGAATGTCCAAGAAATAATAACAGCACCACAC  
GGGACGGACATGAAACCCCCCAGGAGAGGGGCGCCAAATCCACTAGAATCAACACCC  
ATCAACAACACGCTGAATAACACTCCACGTGGGGGAGAGAAGCGAGGCAAGAGGGA  
CCTGGCACCCACGGCCGCCACAGCCCTGGAATACAGAAGAGGGCGGATCTTGGAAC  
TATGGAGGAGGGAGAGCGAGTGACGGATCATACTACCCCGCGGAGGCCGACGCCC  
ACCGAACCAATCACCATATCGTCTCCACTGCCGCTCCACTAGCAATAGGGCATAG  
ACCACAGTCAGCCAACAGGAGTCGATACGCCACCACATTCGGATGGAAAGAGAAC  
ACCAAGAGAGTATGAAGACTCCCATGCAAACAGCAAAGGCAAGAATACCAACAGA  
ACACACACAGGAAGAGGACGCACCCAACGCAAAGATAGCCCAAGTGAACATAAGA  
AACTCAAGAAACCCCAAAGCAGTCACCGAAGTGGTACCAGAGGGTAAAGGGTACC  
ATCTGGGGGAATTAATTCCCGTAGGACCGGTCCGACGAGTCCACGTGGAAGTAATA  
CTGCAAGACACCCTGACCAGCCAGGGCCTTTGTGATACTGGAGCAGAAATATCCAT  
GATATCCAGAGACCTATTTGATGAACTCCAGACTGCCCTCCAGAGGAAGAATGAAA  
CACTACAGATGATGCCAAGTAGGCTTACCTACTCAGGATGCGAAGGGACCCACATG  
CGACCATTGGGCAAGGTCATGATGAAGCTCACGTTCAACGAAATCAACATGAGCCA  
TCCACTATATGTCTGACAGAACCAGGAAAAGAGCTGATCATTGGGATCGAACTACT  
GAATCGCCTTAAACCCATTATGAACCTTGAATCCCGACAAATATGGGCACAGTCAAT  
GCCGGAGCAGCATAAGGATCCAGAAGATGAAGAAGTCGGAAAAGACTCTACGGGA  
ATTCAAATGATAACACAAGAACTCAACGACCTGTACAGACAATCAAGAACGAAAC  
CAAGCGTCCAGCAGAAATACGGACCACTCAACTACTGACCAACAGACTGGGAAAGG  
ACCTTGAGGAAGCCGACCTACGACCAGTAGTTCCCAAGGACTGTCCCCTCATGGAGT  
ATATACCGCCCACTAGTGGCCAAACAGGTGAACAGGGGACTGGTGAAGGAGAACAC  
AAGGCCAAGAGCATATTTCCCTCGGGTGAAGCAAAGGCAATTCAACCGATAATAAC  
GCAAAGGAAACAACAACACTGAGCAACCAGGAATCACAGAAGCCTTAGACCCAGAC  
CAAGGAAAAAGAGTCCCCACAATAGAAGAACAAATTGAACAACAATTGAAGCAG  
CAGACGCCCTTGAGAATGACACTCAACGAAACGAGCTCCGACAACCTGCTCCAGAAA  
TACCACTTCCTGTTCTCAGAAGACTCCTATGATTGCGGCAAACCCGACCTACATGTG  
GTATCTATTCCACCCTGGAGGGAGCACCAGCGGTATACGTGAAACAATACAAGAT  
TCCACTGGCCGCTACGAATCAATCCAAGAAACCTTGGAAAACCTACTCAAGAAGA  
ATATAATTCGGAAATGCAACTCAACCTACAACCTACCAATTTGGCCTGTGCTAAAAC  
CCACGGGCAAGTGGCGACTCACCATCGACTATAGGCAACTCAACAAAACGGTTCCC  
CTATCTCGATGGCCAATGGCAGAAATCGACCAAATCTCAACCAAATAAAAAGGCGC  
AAAAATACTACCACAATGGACCTATCAAATGGTTTCTGGACCATGCCCCTGAAAG  
AAGCAGATCAATACAAGTTGGCCTTCACATTCACGGGATACAGTATACTTGAACC  
GATGCCCATTTGGATACTCAAACCTCACCTGCAGACTTCAACATATTCCTACACAAGG  
CAATGGGTGACGCAAAAAGAGCGAGGCACCATCGTCTATGTGACGACATACTGGTC  
AAGGACTCCTCATGGGAAGAACACCTCGAGAGCCTCCAGCATAACCTCGAGCAGTT  
AAAGGAAGCAGGTGCAAAGATATCAATACAAAAGGGACAGTGGGCACGCAAAAAGG  
GTGGACTACCTCGGGTTCAGATCGGCACTGAGGGAATGTTACCCCAAACGAAAAG  
ACTTGAAGCCCTCCTCGCGCTCAAACCGCCCACCACAGTCACGACCCTTCGGAGCTT  
CTTAGGGATCTGCAACTACCTTCGACAGTTCGTGGACGACTATGCAGGGATCGCTCG

ACCCTTAGTCAAACACTACTACAAAAAGACGAACCATGGGAATGGGGACAAGAACAGG  
AATCCGCAGTGGAAGAATTA AACACGACAGATCACAGGGGCATCCTGCCTAGCATA  
CCAGAGAAAGGAAAAGAATACTACCTAGAGACCGCATACTCAGATCATAGTATCAG  
CTCGGTACTGTACCAGATACAGGAAGCAGGGAAACGAATTATTGCCTATGCCAGCA  
AAGCCCTCCGGGGGGTAGAGACAAAGTTCTCCGAGTGTGAGAAGGCAATATTCGGA  
AACATCTGGGCTATACAACATTTTCGGAACCTTGTTGAACGGAGAGAAAATCATCCTA  
GAAACGAATCATGAATCCTTGGCGTACCTAACAGTAAGAAGATTCGAGAGGGCCG  
CGTAACCAGCAGCCGAATAGCCAATTGGGCACTGACACTCCAAGGCCTACCAATCA  
CAGTAAAATACGCAAAAAACAAGAAAAGTCCAATGGCCCAAGGTCTTGCTGACTTA  
CATGATTGCACCCTAACAGCGTAGAAGCATGTGCCGCAAAGGTACCTCCGGAGGA  
CAACAGGCACCTGCCCTTCAAAAAGGAAACATGTGCCGACCTACCAATGGTGTACA  
TCGATGGATGCTCCAAAATGAAGGAAAACAACTCCACGCCGGATCAGGAATCGTT  
TGGGAAACTGGCCCACTCACAGGGATTCAAGAGGGGTTTCAACTGGGACCAAAGTC  
CAACCAGTATGCAGAATTGGCCGGGGTACACATCGCCGTCAAATGGCATCCAATA  
ACCAAATACAGACCATGGTGGTGTGCACTGATTCCAACACTACGTACAGCACAGCTTCC  
TGCACCACTTACCCATATGGAAAAAGAACGGTATGAAGAACCATAGAAATAAACCA  
ATTCACCATCAAGAACTGTTTCGAGGCCATAGATACGATGGTTCAGAACAAAGATAT  
GAAGATATTTTGGAGAAGGTCAAAGGGCACTCCAAGATACCTGGCCAAGAGAAAA  
CTGGGAATGACCAGGCAGACGCCCTAGCAAAAGTGGGAAGCCTGGAAGGCACACC  
GTGGAAGCTAGAAAACCAAACCGAAAGAGACGGACAACAAGAGTCGACGAACCAA  
GACCCCGCCGTGATAAGACTGGTCACAAGAAGTGGGAAGAACCCTGCAGAAGCTGG  
AACCAGAGCCCAATTGAACAGTGCACAGCCTTCCGAAGACCTAGTCAGAATGCAAC  
AAGAGGACGAAACACTAAAGACACTAGCTGATCATATCCAGGATCCAACAGGAAAA  
CCAATCACTACCGACAACCTGAACGACAACAAGAGCTCGAGACCATGCATAACCA  
AATCAAAAGGTTCTCAATGCGAAAAGGGCTACTGGTATATACGAACGAAAAAGACG  
GTAAAACACTAGATGGGTAGTCCCCTCACAATATCGAGAGATAATGTTACAACACGCC  
CACGACGAACCATGCAGCGGCCACCGATGCGAGATGAACACAGGACAGATGCTGCG  
GCAGGTGGCCTACTGGCCTAAAATGGGTGAAGACATACACAAACATGTGTCCAAC  
GCCTCGTGTGTTGTAAGTACCAGCCAACGACCTCACAGCATAGGGCACCCCTACAG  
AAGAGGGGAACAGACTATCCTTGGTCCAACCTACAAATCGACTGGATAGGACCTGT  
CAACCGATCAACCAAAGGAAATAAGTACATGCTGACTGTGACCTGTGCATTCTCCAA  
ATGGATAGAGTGTTTACCAGCACCCAACAACACCGCGGAGACGACAGCTATCCTAC  
TGATCAACCAAATATTCAGTAGGTGGGGCCTACCGTCAACAATCGATTCAGACAAA  
GGAAGCCACTTCACAGCCGAAGTCATCACAGAAGTGTGGAAGATGTTGGGAGTAAA  
AAGACAACACTACATGTCGCATACCATCCACAATCCTCAGGACAGGTGGAAAGAGCCA  
ACAGGACCATCGTGAGCCTCCTAAAGAAATATGTGTCCACCACGGGACGCGACTGG  
GATACGAAACTACCCCTAGTCTTGATGGCCATGCGAGCCACACCCAACCGAGCTAC  
AGGCAGGACACCCTTCGAGATCATGACAGGGGAGACTAATGACCCTCCCAGTGCACC  
TGCTGTATGTCCCAGCGGAGGACGAGACCCCGACGGCAATGACGCCCACTGAATAC  
CTAACGGGACTGAACAGTCACCTACAGAGCACATTCGCTATGGTCAGAGACCAGTT  
GCAAGCAGAGGCTCAGGGGAGCAAAGCATACTATGACCAAAAAGCCAGCCACGCA  
GAATACCAGCTAGGAGACCAGGTGTTGTACCTCAATTACGAGAAAAGAAAGCAGAA  
GTGCAGGAAATTCCTCCCTCCTGGACAGGACCACACGAGATTGTTGACAAAATGTC  
CCCAGTCGTATATCAGCTAAAAATCACAAAGACAGGAAGAGAGCAGCAGTACAAGT  
GGGTACACATCAATCAAATCAAACCGTACCCTGTGCTGGTGGAAACAAGAGAAGGAA  
TAAAGAAAAAAAAGGGGGGGGGGACCTAAACTAAATTGGGCATGTCACACTAAA

ATAATGTATAAAATGTTTTCCAGGAAATGGCAGCCCTCCTGCTCACGCTCCTGCTAA  
CTTGCTTTGCCAAGCTAGAGGGCAGCCAAGACCTGCTCAAGCCAGGACCAGAATCC  
GGGGTGATGCTGAGAGACTCTTCCGGCTTCCTAGTGACCGAAACGAAAATAGTAAC  
CCAACAAGTCTATGTTTTCTTGGAACCTGCCGTGGTAATAGAGAAACACTTCGGGAA  
GATACCACCCTCAACTACCAGAGCAACCCGAAACTGGTACCATGACTTCCTAAGAT  
ACAGTGAACAGAATGTCGGAACGATCCTGAAGCAATTACAAAGAACCATGATACTT  
CCCCCACCCTGTCAACACAACACGTTCCAAGAGATCGATCGGCCTGGGAGGGGC  
CTTCGGAATACTATCCGGCTTTAGCTCCTTAATCACACTAGGAGTATCCATATCCAA  
CGCCGTGAAGATTGGACACCTCACGCAAGGCGTCGAGAATTTACAGCTCGATATGC  
ATCAAATCCGTCAGCAAATCCGACACCAACAAAAGAATCTGATCGAAATGGGATCC  
ACCCTCAGAGACACCGTGGTTCTCGTTAACCTGCATTCCGCCATGATTAACCTAACA  
ATCCAAGAATTGGGTTTTGCAATCCGAGATCTATACGAAGAAGAGAATACTCGACA  
GCCAATTC AATGGTTGATCCAAGACTTGTTGCGTAGCACCAGCGGCAGCATCAGTGA  
TCTTATCCAAGGACAAATTCCTTCATATCTGGTAACTCCAACACTGATAAAAAATGT  
GCTACAAGCAGCATCCCCAGAAACAATCAGTCCAACACAAGTACAAATTGCCTTTA  
ACATGGGTACAGCCACACCATACATGTGGACCCCCAAACCAGACAGCTGGCATT  
TTGTTAAATTTACCACTGGTCAAACCCGAAAATGTATTTTCGATTGCGGACAGTATTG  
AACGTGGGTACATGGAATAATGACATTTACTCCAAGATGGAAACCCCTTAGTGGTG  
GCCTACCAGGAAGAGGGCCCCCTTAAGTACCTAGTGCCTGACCTAAACATGTGCCA  
AATAATGAAAGAGGTTTCATTGGCTCTGCCAGGGGAACCATTCTAATCAATACAGC  
AGAAATAATGTGCGGTCTGTCAACCCTAAGCTCCAGGGAGACTTGCAAGTTCAAGCT  
AAGTAAACCCAAAGAAAGAACCGAAACAGTGGCCATGATAGCCGATGCTCAGTGGT  
TAATAAGCACACCTCTAGATACGGCAACCGTTTTCCACCGATCAACACTCCGTAAACA  
TGAAAGTTCCGATTCCAAGCCACGTCGCACTGGTCACAGTACCAAGAGGAACATTC  
GTACACATAGGGGACAAGGTATTATATAATTTAGACAAAAGCCTACATCAAGCAGA  
GGTAGAAATAGTAAACACATTCCGAAGCCACAAGTTTGAAATAAGCAGCACTCTGT  
CTAACCTGTTGAACAGTAAAGAATTTTCATACGGTGAAATTAGCCATCAGCGAGTCAG  
AGATTAACGTAACAGATCTCACTTGGGCGACCGAAGAGGCCGGATATCAGCGGAAT  
CAACAGATGGGACTGGGAATCACAGGGGCAACAGGAATGATCATACTAGCCATGGC  
TATCCTAACCTAGCATAACCATATGGCCAAAATGAATGCCGAACTTAAAAGACTAAT  
CGCAGGCACAAGCCACATACCATTTCGAGCCCAGGAACAAAGGTAGAGTCAAGGCCT  
GA

> Loki-Pma consensus sequence *gag-pol* gene

ATGGACAAAGCGCTCGTGAGAATTCCTATTTTCGATCCACACAACAAGAACAGGGA  
TATACACACTCACATAGCTACAGTAGGACAGGAGGCTAAGATCCGGGGTCTGGGTA  
AATCAGCAGAAAAAGCATGTTTTATTATCAAGGAGCTTACATGAATCCGCCAGACCA  
TGGGTAACCTCCCTGCCAAATAGGGTCAAGAGCGATTTCAAGCAATTAAGCCGAGC  
AGTAGTTAAGAGATTTGGGGAATACTCCACACTATCTGAAGGATTGAACGCGGCAA  
AATTGATGACTCAGCGTGCAGACGAAGACCCACGAGATTATCTCCTACGCCTCAAG  
AGAGCATATTACGCAGGTGACGTGGACAACGCCAGGAAGAAGGGAAAATATTAA  
AAGTTATGTTCTTCCAATCACTAAGACCTGAAATAATGAGGATAGTAGGAATGATGC  
TGGACCCCGAGACTGCCTCCCTGCGCCAGATTGAAAGCAAGGCCACACGGCCTGG  
GTGAACGGACGGAGAACCACTAGCATAGCCAAAACACACATCATCACCAAAGATAA  
AGAACGCCTCGATCTGGAGGGAAAGCGAATGTCCAAGAAATAATAACAGCACCACAC  
GGGACGGACATGAAACCCCCCAGGAGAGGGCGCCAAATCCACTAGAATCAACACCC  
ATCAACAACACGCTGAATAACACTCCACGTGGGGAGAGAAGCGAGGCAAGAGGGA

CCTGGCACCCACGGCCGCCACAGCCCTGGAATACAGAAGAGGGCGGATCTTGGAAC  
TATGGAGGAGGGAGAGCGAGTGACGGATCATACCTACCCCGCGGAGGCCGACGCC  
ACCGAACCAATCACCATATCGTCTCCCACTGCCGCCTCCACTAGCAATAGGGCATAG  
ACCACAGTCAGCCAACAGGAGTCGATACGCCACCACATTCGGATGGAAAGAGAAC  
ACCAAGAGAGTATGAAGACTCCCATGCAAACAGCAAAGGCAAGAATACCAACAGA  
ACACACACAGGAAGAGGACGCACCCAACGCAAAGATAGCCCAAGTGAACATAAGA  
AACTCAAGAAACCCCAAAGCAGTCACCGAAGTGGTACCAGAGGGTAAAGGGTACC  
ATCTGGGGGAATTAATTCCCGTAGGACCGGTTCGGACGAGTCCACGTGGAAGTAATA  
CTGCAAGACACCCTGACCAGCCAGGGCCTTTGTGATACTGGAGCAGAAATATCCAT  
GATATCCAGAGACCTATTTGATGAACTCCAGACTGCCCTCCAGAGGAAGAATGAAA  
CACTACAGATGATGCCAAGTAGGCTTACCTACTCAGGATGCGAAGGGACCCACATG  
CGACCATTGGGCAAGGTCATGATGAAGCTCACGTTCAACGAAATCAACATGAGCCA  
TCCACTATATGTCGTACAGAACCCAGGAAAAGAGCTGATCATTGGGATCGAACTACT  
GAATCGCCTTAAACCCATTATGAACCTTGAATCCCGACAAATATGGGCACAGTCAAT  
GCCGGAGCAGCATAAGGATCCAGAAGATGAAGAAGTCGAAAAGACTCTACGGGA  
ATTCAAATGATAACACAAGAACTCAACGACCTGTCACAGACAATCAAGAACGAAAC  
CAAGCGTCCAGCAGAAATACGGACCACTCAACTACTGACCAACAGACTGGGAAAGG  
ACCTTGAGGAAGCCGACCTACGACCAGTAGTTCCCAAGGACTGTCCCCTCATGGAGT  
ATATAACCGCCCCTAGTGGCCAAACAGGTGAACAGGGGACTGGTGAAGGAGAACAC  
AAGGCCAAGAGCATATTCCTCGGGTGAAGCAAAGGCAATTCAACCGATAATAAC  
GCAAAGGAAACAACAACTGAGCAACCAGGAATCACAGAAGCCTTAGACCCAGAC  
CAAGGAAAAAGAGTCCCCACAATAGAAGAACAATTGAACAACAATTGAAGCAG  
CAGACGCCCTTGAGAATGACACTCAACGAAACGAGCTCCGACAACCTGCTCCAGAAA  
TACCACTTCCTGTTCTCAGAAGACTCCTATGATTGCGGCAAAACCGACCTACATGTG  
GTATCTATTCACCCCTGGAGGGAGCACCAGCGGTATACGTGAAACAATACAAGAT  
TCCACTGGCCGCCTACGAATCAATCCAAGAAACCTTGAAAACCTACTCAAGAAGA  
ATATAATTCGAAATGCAACTCAACCTACAACCTACCAATTTGGCCTGTGCTAAAAC  
CCACGGGCAAGTGGCGACTCACCATCGACTATAGGCAACTCAACAAAACGGTTCCC  
CTATCTCGATGGCCAATGGCAGAAATCGACCAAAATCTCAACCAATAAAAAGGCGC  
AAAAATACTCACCACAATGGACCTATCAAATGGTTTCTGGACCATGCCCGTGAAAG  
AAGCAGATCAATACAAGTTGGCCTTCACATTCAACGGGATACAGTATACTTGGAACC  
GATGCCCATTTGGATACTCAAACCTCACCTGCAGACTTCAACATATTCCTACACAAGG  
CAATGGGTGACGCAAAGAGCGAGGCACCATCGTCTATGTCGACGACATACTGGTC  
AAGGACTCCTCATGGGAAGAACACCTCGAGAGCCTCCAGCATAACCTCGAGCAGTT  
AAAGGAAGCAGGTGCAAAGATATCAATACAAAAGGGACAGTGGGCACGCAAAGG  
GTGGACTACCTCGGGTTCAGATCGGCACTGAGGGAATGTTACCCCAAACGAAAAG  
ACTTGAAGCCCTCCTCGCGCTCAAACCGCCCACCACAGTCACGACCCTTCGGAGCTT  
CTTAGGGATCTGCAACTACCTTCGACAGTTCGTGGACGACTATGCAGGGATCGCTCG  
ACCCTTAGTCAAACCTACTACAAAAGACGAACCATGGGAATGGGGACAAGAACAGG  
AATCCGCAGTGAAGAATTAACGACAGATCACAGGGGCATCCTGCCTAGCATAAC  
CCAGAGAAAGGAAAAGAATACTACCTAGAGACCGCATACTCAGATCATAGTATCAG  
CTCGGTACTGTACCAGATACAGGAAGCAGGGAAACGAATTATTGCCTATGCCAGCA  
AAGCCCTCCGGGGGGTAGAGACAAAGTTCTCCGAGTGTGAGAAGGCAATATTCGGA  
AACATCTGGGCTATACAACATTTTCGGAACCTGTTGAACGGAGAGAAAATCATCCTA  
GAAACGAATCATGAATCCTTGGCGTACCTAACAGTAAGAAGATTCGAGAGGGCCG  
CGTAACCAGCAGCCGAATAGCCAATTGGGCACTGACACTCCAAGGCCTACCAATCA

CAGTAAAATACGCAAAAAACAAGAAAAGTCCAATGGCCCAAGGTCTTGCTGACTTA  
CATGATTGCACCCTAACAGCGTAGAAGCATGTGCCGCAAAGGTACCTCCGGAGGA  
CAACAGGCACCTGCCCTTCAAAAAGGAAACATGTGCCGACCTACCAATGGTGTACA  
TCGATGGATGCTCCAAAATGAAGGAAAACAACTCCACGCCGGATCAGGAATCGTT  
TGGGAAACTGGCCCACTCACAGGGATTCAAGAGGGGTTTCAACTGGGACCAAAGTC  
CAACCAGTATGCAGAATTGGCCGGGGTACACATCGCCGTCCAAATGGCATCCAATA  
ACCAAATACAGACCATGGTGGTGTGCACTGATTCCAACACTACGTACAGCACAGCTTCC  
TGCACCACTTACCCATATGGAAAAAGAACGGTATGAAGAACCATAGAAATAAACCA  
ATTCACCATCAAGAAGTGTTCGAGGCCATAGATACGATGGTTCAGAACAAAGATAT  
GAAGATATTTTGAAGAAGGTCAAAGGGCACTCCAAGATACCTGGCCAAGAGAAAA  
CTGGGAATGACCAGGCAGACGCCCTAGCAAAAGTGGGAAGCCTGGAAGGCACACC  
GTGGAAGCTAGAAAACCAAACCGAAAGAGACGGACAACAAGAGTCGACGAACCAA  
GACCCCGCCGTGATAAGACTGGTCACAAGAAGTGGGAAGAACCCTGCAGAAGCTGG  
AACCAGAGCCCAATTGAACAGTGCACAGCCTTCCGAAGACCTAGTCAGAATGCAAC  
AAGAGGACGAAACACTAAAGACACTAGCTGATCATATCCAGGATCCAACAGGAAAA  
CCAATCACTACCGACAACCTGAACGACAACAAGAGCTCGAGACCATGCATAACCA  
AATCAAAAAGGTTCTCAATGCGAAAAGGGCTACTGGTATATACGAACGAAAAAGACG  
GTAAAAGTACTAGATGGGTAGTCCCCTCACAATATCGAGAGATAATGTTACAACACGCC  
CACGACGAACCATGCAGCGGCCACCGATGCGAGATGAACACAGGACAGATGCTGCG  
GCAGGTGGCCTACTGGCCTAAAATGGGTGAAGACATACACAAACATGTGTCCAAC  
GCCTCGTGTGTTGTAAGTACCAGCCAACGACCTCACAGCATAGGGCACCCCTACAG  
AAGAGGGGAACAGACTATCCTTGGTCCAACCTACAAATCGACTGGATAGGACCTGT  
CAACCGATCAACCAAAGGAAATAAGTACATGCTGACTGTGACCTGTGCATTCTCCAA  
ATGGATAGAGTGTTTACCAGCACCCAACAACACCGCGGAGACGACAGCTATCCTAC  
TGATCAACCAAATATTCAGTAGGTGGGGCCTACCGTCAACAATCGATTCAGACAAA  
GGAAGCCACTTCACAGCCGAAGTCATCACAGAAGTGTGGAAGATGTTGGGAGTAAA  
AAGACAACACTACATGTGCGCATAACCATCCACAATCCTCAGGACAGGTGGAAAGAGCCA  
ACAGGACCATCGTGAGCCTCCTAAAGAAATATGTGTCCACCACGGGACGCGACTGG  
GATACGAAACTACCCCTAGTCTTGATGGCCATGCGAGCCACACCCAACCGAGCTAC  
AGGCAGGACACCCTTCGAGATCATGACAGGGAGACTAATGACCCTCCCAGTGCACC  
TGCTGTATGTCCCAGCGGAGGACGAGACCCCGACGGCAATGACGCCCACTGAATAC  
CTAACGGGACTGAACAGTCACCTACAGAGCACATTCGCTATGGTCAGAGACCAGTT  
GCAAGCAGAGGCTCAGGGGAGCAAAGCATACTATGACCAAAAAGCCAGCCACGCA  
GAATACCAGCTAGGAGACCAGGTGTTGTACCTCAATTACGAGAAAAGAAAGCAGAA  
GTGCAGGAAATTCCTCCCTTCCCTGGACAGGACCACACGAGATTGTTGACAAAATGTC  
CCCAGTCGTATATCAGCTAAAAATCACAAAGACAGGAAGAGAGCAGCAGTACAAGT  
GGGTACACATCAATCAAATCAAACCGTACCCTGTGCTGGTGGAAACAAGAGAAGGAA  
TAA

> Loki-Pma consensus sequence Gag-Pol polyprotein

MDKALVRIPYFDPHNKNRDIHTHIATVQGAEKIRGLGKSAEKACLLSRSLHESARPWVT  
SLPNRVKSDFKQLSRAVVKRFGEYSTLSEGLNAAKLMTQRADEDPRDYLLRLKRAYYA  
GDVDNAQEEGKILKVMFFQSLRPEIMRIVGMMLDPETASLRQIESKAHTAWVNGRRTTS  
IAKTHIITKDKERLDLEGSECPNRRNNSTTRDGHETPQERAPNPLESTPINNTLNNTPRGER  
SEARGTWHPRPPQPWNTEEGGSWNYGGGRASDGSYLPRGGRRPPNQSPYRLPLPPPLAI  
GHRPQSANRSRYAHHIRMEREHQESMKTQMATAKARIPTTEHTQEEDAPNAKIAQVNIRN  
SRNPKAVTEVVPEGKGYHLGELIPVGPVGRVHVEVILQDTLTSQGLCDTGAEISMISRDL

FDELQ TALQRKNETLQMMP SRLTYSGCEGTHMRPLGK VMMK LTFNEINMSHPLYVVQ  
NPGKELIIGIELLNRLK PIMNLES RQIWAQSMPEQHKDPED EEVGKDSTGIQMITQELNDL  
SQTIKNETKRPAEIRTTQLLTNRLGKDL EADLRPVVPKDCPLMEYIPPTSGQTGEQGTG  
EGEHKAKSIFPSGEAKAIQPIITQRKQQTEQPGITEALDPDQGKRVP TIEEQIEQQIEAADA  
LENDTQRNELRQLLQKYHFLFSEDSYDCGKTDLHVVS IPTLEGAPAVYVKQYKIPLAAY  
ESIQETLENLLKKNIRKCNSTYNSPIWPVLKPTGKWRLTIDYRQLNKTVPLSRWPM AEID  
QNLNQIKGAKILTTMDLSNGFWTMPVKEADQYKLAFTFN GIQYTWNRCPFGYSNSPAD  
FNIFLHKAMGDAKERGTIVYVDDILVKDSSWEEHLES LQHTLEQLKEAGAKISIQKGQW  
ARKRVDYLGFIQIGTEGMLPQTKRLEALLALKPPTVT TLR SFLGICNYLRQFVDDYAGIA  
RPLVKLLQKDEPWEWGQEQESAVEELKRQITGASCLAYPEKGKEYYLETAYSDHSISSV  
LYQIQEAGKRIIAYASKALRGVETKFSECEKAIFGNIWAIQHFRNLLNGEKIILETNHESLA  
YLNSKKIREGRVTSSRIANWALTLQGLPITVKYAKNKKSPMAQGLADLHDCTLNSVEAC  
AAKVP PEDNRHLPFKKETCADLPMVYIDGCSKMKENKLHAGSGIVWETGPLTGIQEGF  
QLGPKSNQYAELAGVHIAVQMASNNQIQTMVVCTDSNYVQHSFLHHLPIWKKNGMKN  
HRNKPIHHQELFEAIDTMVQNKDMKIFWKVKVGHSKIPGQ EKTGNDQADALAKVGSLE  
GTPWKLENQTERDGGQESTNQDPAVIRLVTRSGKNPAEAGTRAQLNSAQPS EDLVRMQ  
QEDETLKTADHIQDPTGKPITDNLNDNKELETMHNQIKRFSMRKGLLVYTNEKDGKT  
RWVVP SQYREIMLQHAHDEPCSGHRCEMNTGQMLRQVAYWPKMGEDIHKHVS NCLV  
CKYQPTTSQHRAPLQKRGTDYPWSNLQIDWIGPVNRSTKGNKYMLTVTCAFSKWIEC  
LPAPNNTAETTAILLINQIFSRWGLPSTIDSDKGSHTAEVITEVWKMLGVKRQLHVAYH  
PQSSGQVERANRTIVSLLKKYVSTTGRDWDTKLPLVLMAMRATPNRATGRTPFEIMTG  
RLMTLPVHLLYVPAEDETPTAMPTEYLTGLNSHLQSTFAMVRDQLQAEAQGS KAYYD  
QKASHAEYQLGDQVLYLNYEKRKQKCRKFLPSWTGPHEIVDKMSPV VYQLKITKTGRE  
QQYKVVHINQIKPYV LVEQEKE\*

> Loki-Pma consensus sequence *env* gene

ATGGCAGCCCTCCTGCTCACGCTCCTGCTAACTTGCTTTGCCAAGCTAGAGGGCAGC  
CAAGACCTGCTCAAGCCAGGACCAGAATCCGGGGTGATGCTGAGAGACTCTTCCGG  
CTTCTAGTGACCGAAACGAAAATAGTAACCCAACAAGTCTATGTTTCTTGGAAACC  
TGCCGTGGTAATAGAGAAACACTTCGGGAAGATAACCACCCTCAACTACCAGAGCAA  
CCCGAAACTGGTACCATGACTTCCTAAGATACAGTGAACAGAATGTCGGAACGATC  
CTGAAGCAATTACAAAGAACCATGATACTTCCCCCACC ACTGTCAACACAACACGT  
TCCAAGAGATCGATCGGCCTGGGAGGGGCCTTCGGAATACTATCCGGCTTTAGCTCC  
TTAATCACACTAGGAGTATCCATATCCAACGCCGTGAAGATTGGACACCTCACGCAA  
GGCGTCGAGAATTTACAGCTCGATATGCATCAAATCCGTCAGCAAATCCGACACCA  
ACAAAAGAATCTGATCGAAATGGGATCCACCCTCAGAGACACCGTGGTTCTCGTTA  
ACCTGCATTCCGCCATGATTA ACTTAACAATCCAAGAATTGGGTTTCGCAATCCGAG  
ATCTATACGAAGAAGAGAATACTCGACAGCCAATTCAATGGTTGATCCAAGACTTGT  
TGCGTAGCACCAGCGGCAGCATCAGTGATCTTATCCAAGGACAAATTCCTTCATATC  
TGGTAACTCCAACACTGATAAAAAATGTGCTACAAGCAGCATCCCCAGAAACAATC  
AGTCCAACACAAGTACAAATTGCCTTTAACATGGGTACAGCCACACCCATACATGTG  
GACCCCAAACCAGACAGCTGGCATT TTTTGTAAATTTACCACTGGTCAAACCCGAA  
AATGTATTTGATTGCGGACAGTATTGAACGTGGGTACATGGAATAATGACATTTAC  
TCCAAGATGGAAACCCCTTAGTGGTGGCCTACCAGGAAGAGGGCCCCCTTAAGTA  
CCTAGTGCCTGACCTAAACATGTGCCAAATAATGAAAGAGGTTCA TTGGCTCTGCCC  
AGGGGAACCATTCCTAATCAATACAGCAGAAATAATGTGCGGTCTGTCAACCCTAA  
GCTCCAGGGAGACTTGCAAGTTCAAGCTAAGTAAACCCAAGAAAGAACCGAAACA

GTGGCCATGATAGCCGATGCTCAGTGGTTAATAAGCACACCTCTAGATACGGCAACC  
GTTCCACCGATCAACACTCCGTAACCATGAAAGTTCGATTCCAAGCCACGTCGCA  
CTGGTCACAGTACCAAGAGGAACATTCGTACACATAGGGGACAAGGTATTATATAA  
TTAGACAAAAGCCTACATCAAGCAGAGGTAGAAATAGTAAACACATTCCGAAGCC  
ACAAGTTTGAATAAAGCAGCACTCTGTCTAACCTGTTGAACAGTAAAGAATTCATA  
CGGTGAAATTAGCCATCAGCGAGTCAGAGATTAACGTAACAGATCTCACTTGGGCG  
ACCGAAGAGGCCGGATATCAGCGGAATCAACAGATGGGACTGGGAATCACAGGGG  
CAACAGGAATGATCATACTAGCCATGGCTATCCTAACCTAGCATACCATATGGCCA  
AAATGAATGCCGAACCTAAAAGACTAATCGCAGGCACAAGCCACATACCATTGAG  
CCCAGGAACAAAGGTAGAGTCAAGGCCTGA

>Loki-Pma consensus sequence Env protein

MAALLLTLTLCFAKLEGSQDLLKPGPESGVMLRDSSGFLVTETKIVTQQVYVSLEPAV  
VIEKHFGKIPPSTTRATRNWYHDFLRYSEQNVGTILKQLQRTMILPPTTVNTTRSKRSIGL  
GGAFGILSGFSSLITLGVSNVAVKIGHLTQGVENLQLDMHQIRQQIRHQKNLIEMGSTL  
RDTVVLVNLHSA MINLTIQELGFAIRDLYEEENTRQPIQWLIQDLLRSTSGSISDLIQGQIP  
SYLVTPTLIK NVLQAASPETISPTQVQIAFNMGTA TPIHVD PQTRQLAFLNLPLVKPENV  
FRLRTLNVGTWNNDIYSKMETPLVVAYQEEGPLKYLVPDLNMCQIMKEVHWLCPGEP  
FLINTAEIMCGLSTLSSRETCKFKLSKPKERTETVAMIADAQWLSTPLDTATVSTDQHSV  
TMKVIPSHVALVTVPRGTFVHIGDKVLYNLDKSLHQAEVEIVNTFRSHKFEISSLSNLL  
NSKEFHTVKLAISESEINVTDLTWATEEAGYQRNQQMGLGITGATGMILAMAILTLAYH  
MAKMNAELKRLIAGTSHIPFEPRNKGRVKA\*

>Loki-Ape consensus sequence

TTGGGCGACCTGGTCCGTCAGGGCAACGCGCGCCGCATCCACACGTCAGTGATGCTT  
GGTAGCTGTGT CAGCATTCTTGCATTGTTGGACTCTGGCTCTGAAATAAGCCTGATG  
AGTTCCGACACTTTCTCAAAGGTGGCGAAAGCGATGCACCTCATTGGCAAACCCCTT  
CAAATCGAGCCCTGCGACGTTAGCATCACCAGCTACACGCAGGACAGGTCACCCAT  
CACGAAGCGCGCTTGGGTTGACATAACTTTCAAAGAAATGTCTCTTGTACACCCCAT  
TTACATCTGCCTTCTTGACACCGAACCTCTGCTTATTGGCCAAGATCTCCTAGATCGA  
CTGGCACCTCTCATCGACTGCCATCAGGGTCATATCTGGGCTCAGGTGAAAACCCCA  
AAGCCACTTTGCCCTCTAACAATGGGCCTGACGGACATGTCGCCGTCATTCAAGAG  
ACTCACGGGGATCTGCCTACGCTCGTGGCCTCTCCCAGGCCAACCGGCGACCCCGCC  
TCTTTCACGACCTCCTCCCCTCTGTGGGAGGATAGTTCAAACCCTCTCCGCAGTCATG  
AGTCTTTTCTCTGTTCCCTTAGCAAACCTCCAACCAGGAGCTGTACAGTCGCAGAGTGG  
TCGGGGAAGTCCAGCTCAACGGTCTTCTCATATCGGACGCCCCTGCTGGCGCTCTGGT  
TGGAGAGAACCGCAGTCAGCCAGGACCTGTACCACGAACTTCAAAGAAAGACCCA  
CCCCAGTTTTCTCCAACGTAGCCACCGTGTCTGTCGGCAACACACCCACAAACC  
CTCCTCAAGGCCGTTCGGTGTATGTGCCCTCTTGGTACTGATTGGGAGAAAAAGGGTG  
TTTCATTTTGT CAGTGTGGTACCCGACCTCCATGCCCCGTTCTTCATGGGGGCGGACC  
TTCTGGT CAGGCTCGGGGCCAGTTAGACACGGTCAATCAGGTTTTGTGGT CACGAG  
CCAACGCAGAAGCTCATTCCCTAACGACCGAACACAGCAAATGACTTCGGGGCAG  
ACCATTCCCAAGCCTGCCGGGTAATGAGTGAAACGGTGGTGACCATCCCAGCACG  
GACAGCCGGTGTTCATCCGTCTTGCAATCTGTCAGGGCCAGAAGATACCTGGCCC  
TCGAGCTTTCTTCCAGCCGTTGCCGATTTTGGGAAAATTA ACTTGGCCGTCTGTGGC  
ACGCCCTGCTTGAGTTGGACAATCGTTCAGCCTACCTCCTTGTT CAGAATCTTACGC  
AAGCCCCGATCCAGGTTGCAGCACGGCAACTTCTGGGGATGCTGATTGACCACTCTT  
TTCATGATTTTGA ACTGACCATTCCGGTCATAGGGGAGATGCCCCCGTCTTTGGACA



CCAATCTTGACGGTGTCTCTTCACTTACCCGACTAAAATGATCACCGTTGCCAGTG  
ACGAAACGCTACAGAACGAAACAATCTGCAGCACAAGTTTAGGCAAAGAGGGGA  
CATGGTTGTGTACGCCCTGGTGGCACAACCAGGAGGGTCCCCAGATACTGGTGACA  
AAAGACAGGAGTCACCAGAGGAACCGTACCCTGGGTTCGAGTCTGAGATTGAACAG  
CAGCTGGTTAAAGCAGATGCCCTGACAACAGAGCAGCAGCGAAACGAGCTCCGGAA  
ACTATTTTCATGAGTTCAGCCAATCTTCTCCAAAGACTCCCAAGATTGCGGAGTCAC  
GGACATCCACACTGTTTCGCATCCCCACTGATCCAGGCGCAGCACCCACCTTTGTACG  
CCAGTACAAAATCCCGTTGGCCGCCTATGAGTCGATCCAAGAGATTCTCGACAAGCT  
GTTGGAAAACGGATTGTCAGGGAATGCAACTCCACATACAATTCACCCATTTGGCT  
GATGTTAAAGTGCCCATATTATGAAAAAAACACTTTTTCTGGGATTTGGGGTGTCT  
TTTGTGTCTCTGGTGCTTCCACACACATAAACTTTGAAAAAAATCCATCCATGCT  
GTTTTGNAGTGAGATATGGTTTCTGAATGTGTCTTGCCTTCAGTCTCCTAGTGAGCTG  
TTCAAATCGGCTCGGACTGTGACGTCACAGTCCGAAATGAGCTGGCTAACCCAAA  
CCGTTANGCTCGTAGCGTTAGCATGCTAACGCTAATGCTAACGCTAGCATGCTACGT  
CGTTCTCAATAGCAAAGCACTGCTACAACACACACAAGTTCACCATAATCTACAAA  
AGAACTACTTACATGTGCGCCCTCATTTAGAAGTCTCCCAGCTAATCCTGCCTTGTA  
ACTGNCCAAAGTTGGAGAAACAGCCTTTCTTTTACTGTCTCGAGTTAGCTAGCTGNC  
ATGATCTACATCTGAGCTACTGNGCATGTGCGAGTGCAATCAAAGATAGTTANGAA  
GAAGAAGATGAAAAGAGGTCTCACTCTGTAGCTAAAACAGAAACCAGGTGNAAG  
AGGATCTGCAGCAGTGNGAGAGAGCTGTGCAGTACAACAAAAATATGGTGTTTTTT  
GAAAATCAAACCATGTANACCTATTCTGGTACAACCTTAAAATACAGTTATGAACCT  
GAAAATGAGCATAATATGGGCGCTTTAAAACCGACCGGGAAATGGCGTCTCACTAT  
TGACTATCGGCCATTAAACAAACAGGTCCCCTCTCCCGTTGGCCCATGATCCACTT  
GGATCAGGAACTGGCCAAGGTCAAAGAGGCCCGTTTCTTTTCAACGGTAGATGTGG  
CAAACGGTTTCTGGACCATGACGGTTGACCCGGTTGACCAGTACAAGCTGGCTTTCT  
CTTTCTGCAATCGCCAGTACACCTGGAACCGCTGCCCGTTCGGATATTCAAACCTCCC  
CAGCTGAGTTCAACATTTTCTCCACAAGGCAATGAGCGATGCCTCAGCCCGTGGAA  
ACCTCATCTACGTGGACGACATCCTCATGAGGAGTCGGTCCCTTCGATGACCACCTGG  
CCGAGATCCGTCACGTTCTTGGCCAGCTTGGCGCCGAGGAGCAAACTGGCAATC  
GCCAAGGGCCAGTGGTGCCGCACCAAGGTAGAGTACGTGGGACTGACCGTGGGTGC  
CAATGGTATTGAGCCTAAAGCAGAAAGGATTTCGAGCTATCCAAGACATCATGGCCC  
CTGTGAACGTGTCAAACCTCCAGAGCTTTCTGGGAGTCTGTAACCTATTCCCGACAGT  
TCATCGCAGACTACGCAGAAATAGCCAGACCCCTCACAGAACTCCTCGGCAAAGAC  
AAACCGTTCCTGTGGGGTGAACCCCAAGAGCAGGCCTTCCGCCAAATGAAGGCAGA  
ACTCTGCTCCGCTCCCTGTCTGGCCTACCCGGACAAGGACAAGGAGTTCAACCTTGA  
GGCGAGTTTCTCCACCCAGTGCCTTAGTGCCGCCTTGGCCCAGAAATATGATGCAGA  
CAAACGGGTCGTGGCTTACGCCAGCCGACCCCTTAGCAGCGTTGATATGAAGTTTTTC  
CGACTGCGAGAAAGCCCTTCTGGCCACAGTGTGGGCGGTGGAACACTTCCACAGCT  
ATGTAGGGGGGCAAAGGTGGTCATTGAGACCTGTCACCAACTTGTACCTTCCCTGA  
ACAGCCAGCGGCTTCGGGAAGGGCGGGTGTCCAATAGCCGCATCGCCTCCTGGATG  
ATGGCGTTGCAAGGCTATGACATCGAGGTAAAGTACGCTCAGAACCACAAGATGGC  
ACTGGGTCAAGGCCTGGCTGAGTGTCAACACTGCGACTGTGATGAGCAGCCAAGTC  
TCCAGTCCCTACTGGTCACCACCCCGTCACTCCCGTCCAATCATCATTATTATGATGA  
AATGTTTNGTCAAGGCCTCCTTGAAGTCTATGTGGATGGATGCTCATTCCACCACGA  
AAGTCAGACTCAAGCTGGTGTGGGCATTTACTGGGTCAACTACCGCAGTGAGGAAC  
CCAGTCACTACCAACTTGGTCCCAAGACAAGCCAGTACGCAGAAATCGCTGCAGGG

TTCATTGCGCTTCAACAAGCGGCCAGACAAAAGATCAGCCAACTGGTGATCTGCTCT  
GACTCCAACCTATGCCCGCTACAGTTTCGTTGCACACTTTCCTGCGTGGAAAGAGAAA  
GGTATGCTGAATGCCCCGAACAAAGAGATCAAGCACGCAAAACTTTTCCTTGCATGC  
GACCGACTGGTCTCACAGCAAGGAATGACCGTGTACTGGAGAAAGGTCAAGGGCCA  
TTCCCAAATCTCTGGTGGGGATAAGGAAGGAAATGATGAAGCTGACCGCCTGGCCA  
AACTGGGCGCAAGTCAAGGTACGCCCTGGGAGTTTCAGGAGGAGTGCTTCCAGTC  
CCCCAACTCACGCTGTGAACGCAATCACTCGCCGTCAGGCCAGAGAGAGACGAGA  
AACTCTCAAGCCTGTGCGCAAACCCTAAATCTGTGTGCGCCAGCCTGAGGACACAG  
ACCTAATCACCATGCAGGAGAGGGACCCAGCTATTTGGGCCGTACGGCAGCTGCTA  
GCAAACCCCTCACCTCAAACACCACTCAATCCTCACCAGGTGAGCCAGAGGAACT  
ACAAGCCTTCCGCCTCAACCCGCAGTCTTTCAGGATTGAGAAGGGTCTGTTGGTCTA  
CTCTGATGGTGATCAGGGACCGACACGGTGGGTGCTCCCCACTGACCACAGGGGGG  
TGATGTTAGCACACGCTCACGACTCTCCAGTGGGGGGCCATCGAGGCCCCCAACCC  
ACACTGGAAACCCTCCGACAAGTTGCCTATTGGCCGTCCATGAGCCGCGATGTCAAG  
GCTTACGTTAAGGGATGTTTGGTCTGCTGCCAGTTCAGCCATCCCGGCCATTGGGT  
AGAGCCCCACTCCAGAAAAGGGGGGTCACGTTCCCCTGGTCCCACCTCCAAGTGGA  
CTGGGTGGGCCCCGTACCCAGATCGTCAAGAGGAAATAAATACCTCCTCACGGTCA  
CATGCGCTTTTACAAAATGGGTGGAATGCCTTCCAGCACCCAACGACACGGCAACG  
ACCACAGCAGTCTTGCTACTAAACCATGTTTTAGTTCGTTGGGGACTACCACTCTCC  
GTCAATTCGGATCAAGGCACCCATTTACGTCCGGGGTCATGACTGCAATGTATGAC  
ATTCTGGGAGTAAAAGCAAGATTCCACATCCCATATCACCCCCAATCATCAGGCCAA  
GTGGAACGCGCTAACCGGACCATTGTCAACATGCTCAAGAAGTATGTCAATGGCAG  
CGCTAGGGATTGGGACGTGAAACTTCCCCTGGTACTGATGGCCATCAGGTCCACTCC  
ACACCGCACCACGGGGATCACTCCATTGAGATGATGACCGGGAGAGAGATGACGC  
TGCCACTGCATCTTGTACCACCCTGAAGATGTCAGTGTGCGCAACGGCCTACACTG  
CCACTCAATACGTCTCAAATTTGCGTGAACATCTTCAGTCCACGTTTGCCTGGGCCC  
AAGAAAACCTGGAGACAAGGGTAAAGGGGGCCAAGGCGTACTACGACCGAAAGAC  
AACTCCCCACGAGTATGAAATAGGTGACAAAGTCTTCTATTTTCAGGTTACCAAACC  
GGTGAGAATCTCTCGAAAGTTCCTACCGAGCTGGTCAGGCCAAGTTGAGATTGTGGG  
AAAACGTTCCCCGGTGGCGTACCGGATCAGATTGGCTAAGCCGAAACAGCCACCAA  
CCTACAAATGGGTCCATTCAAACCAAATCAAGCCATACGAGACGCCACCCCTCGTTT  
CAGAAAGGGAAAACCTCCCATCAGTAGAAAGGGGGAACAGCCCGACACAGACATA  
GGATATACTACAGGGCCCATAGGAATAACTGCATGACCAATCACTTCCGCGAGCAT  
GCACTAACCCCTAAAAGAAATCCCCTGTCCACCTAGTAATCAAACCTCTGTTCTGTT  
GCAGGATGGAACACTGTGGGTCCCTGGCATTCTTCTCGGGCTATCAACCCCTCTCC  
CAACTGAGGTGGTTGAATCAGGCCCGTCCACCGGGATCGTCCTCCAGGGGGCGCCC  
GGACTGCTAATCACCCGTGGTCTCTTACCCAGAGAGTCTATGTACGACTAGACCCC  
TGGGATGTCTACCGCAAACACATCGTTCTACCACCCCAATTGACCGAGGGACGGTTA  
AGTGGGATCCAGACCCATGACACAGTAGAACGCACTAAACAGACCACTGCCACAT  
TCTGGAACAACTGCAAAAATTCATAGTCACAGAAGAAGACCTCAGTGGCCAGAAAC  
GACCTAAACGTTTCTTAGGCGGCCTGCTCGTCGCAGCCTCAGCCATCGGGTCATTAT  
TTTCTATTGGCCTGTCCGCGGCAAACCTCAGTTAGCCTCGGCGCACTCCAGAGACACA  
TGGGGGAACTCGACCAAAAAATGCCAGAGATCCAACAGAGACTCCTCCTCCAACAA  
GAACAGTTACAAAACCTGGGAAAAACTTTCCAGGGGACCATAGTTACTGTACATTTG  
CACTCTGCCCTCCTGAATAACACCATGCATGCCTTAGAGAATTTGTCCAAAGTGGTC  
CAAGAAGACCTAACATACGTACGAATAGTCAGAGACCTAATGCAGGACCTTGTGAG

GGAGGTTAGCTCCTCAGTCAATAGCCTGAGCGCGGGAAAAATTCCAGCCTATCTAGT  
CTCATTAGGACTCGTTGAACAAATCTTGAAATCCACCACTAGTACGGTAGTACACCC  
TTCACAGGTACACCTGGCGTATAGCCTTGGCAGTGCAATCCCATCTCAGTAGACTC  
TAAGA ACTTAGAGATAGGTTTCATCCTCAATCTTCCGATTCTAGAGAGACAAAACAT  
ATACCGACTAAAGTCTGTA CTGTAACGTGGGCTTCTGGAAAGGTAACACACATATAC  
ACCTTAAGACCCCAACCAATTGCTTTCCATGAGGACAACCCCTCACTCTACCTCA  
TTCCTAACCTTAACATGTGCACTAAAACAACAAAAGACATTCACTGGGTCTGCCCCG  
GCAACCCATTCGTTAGAGATGTCACTAACTACCTCTGCGGCCTGAGGGCCGACACAC  
CTGAACAAAATGTCAGGGCAGTATGTCCATAAGGGACGAGGGAACAGAAACAAG  
GGTGGAACGGGCGGGTAACCGATGGCTCGTTAGTACACCCGTC ACTGAAGCGTTAA  
TGTCTACGACCGTCATGACACAGCCACTAAGTTAACCTTACCTAACCAAACGGTAT  
TTTTAACGGTTCCCCAAGGAGCTACCATT CATATCAATGACATTGTCCTCCATCATCT  
CAATCCCGACAGACACGATGCCGAGATTGAGATCATGGACGCATTTTCGAGGCCACG  
ACCTCACTATTGAATACCCCTCCAACAGCAACTTCTGGCTGAGGGGACTAAACTGG  
TTCAGTTCAGCCTCAAACCTACTGGGCTTACTACCACGTTTTTCCAACCATGTAGGGA  
GTTCCGGCATCTTACCAAGACCACCCTGTTAGCATGGTTGCCTTGGGCCTCCTTCTTAG  
TGGCTGGATCATCACCGCGATAGTCGCACATTT CATGTACAGACACATA CAGAATTT  
GCAA ACTAAACTTGACTCGATTCTGTTCTGATCACCACGTTTCACACAGCAGCCAC  
ATCGTCCCCTAG

> Loki-Ape consensus sequence *pol* gene

TTGGGCGACCTGGTCCGTCAGGGCAACGCGCGCCGCATCCACACGTCAGTGATGCTT  
GGTAGCTGTGTCAGCATTCTTGCATTGTTGGACTCTGGCTCTGAAATAAGCCTGATG  
AGTTCCGACACTTTCTCAAAGGTGGCGAAAGCGATGCACCTCATTGGCAAACCCCTT  
CAAATCGAGCCCTGCGACGTTAGCATCACCAGCTACACGCAGGACAGGTCACCCAT  
CACGAAGCGCGCTTGGGTTGACATAACTTTCAAAGAAATGTCTCTTGTACACCCCAT  
TTACATCTGCCTTCTTGACACCGAACCTCTGCTTATTGGCCAAGATCTCCTAGATCGA  
CTGGCACCTCTCATCGACTGCCATCAGGGTCATATCTGGGCTCAGGTGAAAACCCCA  
AAGCCACTTTGCCCTCTAACAATGGGCCTGACGGACATGTCGCCGTCATTCAAGAG  
ACTCACGGGGATCTGCCTACGCTCGTGGCCTCTCCCAGGCCAACCGGGCAGCCCGCC  
TCTTTCACGACCTCCTCCCCTCTGTGGGAGGATAGTTCAAACCCTCTCCGCAGTCATG  
AGTCTTTCTCTGTTCTTAGCAA ACTCCAACCAGGAGCTGTACAGTCGCAGAGTGG  
TCGGGGAAGTCCAGCTCAACGGTCTTCTCATATCGGACGCCCGTCTGGCGCTCTGGT  
TGGAGAGAACCGCAGTCAGCCAGGACCTGTACCACGAACTTCAAAGAAAGACCCA  
CCCCAGTTTTCTCCAACGTAGCCACCGTGTCTGTCCGCAACACACCCACAAACC  
CTCCTCAAGGCCGTCGGTGTATGTGCCCTCTTGGTACTGATTGGGAGAAAAAGGGTG  
TTTCATTTTGT CAGTGTGGTACCCGACCTCCATGCCCCGTTCTTCATGGGGGCGGACC  
TTCTGGTCAGGCTCGGGGCCAGTTAGACACGGTCAATCAGGTTTTTGTGGTCACGAG  
CCAACGCAGAAGCTCATTCCCTAACGACCGAACCAACAGCAAATGACTTCGGGGCAG  
ACCATTCCCCAAGCCTGCCGGGTAATGAGTGAAACGGTGGTGACCATCCCAGCACG  
GACAGCCGGTGTTCCTATCCGTCTTGAATCTGT CAGGGCCAGAAGATACTGGCCC  
TCGAGCTTTCTTCCAGCCGTTGCCCGATTTTGGGAAAATTA ACTTGGCCGTCTGTGGC  
ACGCCCTGCTTGAGTTGGACAATCGTTCAGCCTACCTCCTTGTTCAGAATCTTACCG  
AAGCCCCGATCCAGGTTGCAGCACGGCAACTTCTGGGGATGCTGATTGACCACTCTT  
TTCATGATTTTGA ACTGACCATTCCGGTCATAGGGGAGATGCCCCCGTCTTTGGACA  
CCAATCTTGACGGTGTCTCTTCACTTACCCGACTAAAATGATCACCGTTGCCAGTG  
ACGAAACGCTACAGAACGAAACAATCTGCAGCACAAGTTTAGGCAAAGAGGGGA

CATGGTTGTGTACGCCCTGGTGGCACAACCAGGAGGGTCCCCAGATACTGGTGACA  
AAAGACAGGAGTCACCAGAGGAACCGTACCCTGGGTTTCGAGTCTGAGATTGAACAG  
CAGCTGGTTAAAGCAGATGCCCTGACAACAGAGCAGCAGCGAAACGAGCTCCGGAA  
ACTATTTTCATGAGTTCCAGCCAATCTTCTCCAAAGACTCCCAAGATTGCGGAGTCAC  
GGACATCCACACTGTTTCGCATCCCCACTGATCCAGGCGCAGCACCCACCTTTGTACG  
CCAGTACAAAATCCCGTTGGCCGCCTATGAGTCGATCCAAGAGATTCTCGACAAGCT  
GTTGGAAAAACGGATTGTCAGGGAATGCAACTCCACATAACAATTCACCCATTTGGCT  
GATGTTAAAGTGCCCATATTATGAAAAAAACACTTTTTCTGGGATTTGGGGTGTCT  
TTTGTGTCTCTGGTGCTTCCACACACATACAAACCTTTGAAAAAAATCCATCCATGCT  
GTTTTGNAGTGAGATATGGTTTCTGAATGTGTCCTGCCTTCAGTCTCCTAGTGAGCTG  
TTCAAATCGGCTCGGACTGTGACGTCACAGTCCGAAATGAGCTGGCTAACCAAA  
CCGTTANGCTCGTAGCGTTAGCATGCTAACGCTAATGCTAACGCTAGCATGCTACGT  
CGTTCTCAATAGCAAAGCACTGCTACAACACACACAAGTTCACCATAATCTACAAA  
AGAACTACTTACATGTGCGCCCTCATTTAGAAGTCTCCAGCTAATCCTGCCTTGTA  
ACTGNCCAAAGTTGGAGAAACAGCCTTTCTTTTACTGTCTCGAGTTAGCTAGCTGNC  
ATGATCTACATCTGAGCTACTGNGCATGTGCGAGTGCAATCAAAGATAGTTANGAA  
GAAGAAGATGAAAAGAGGTCTCACTCTGTAGCTAAAACAGAAACCAGGTGNAAG  
AGGATCTGCAGCAGTGNGAGAGAGCTGTGCAGTACAACAAAAATATGGTGTTTTT  
GAAAATCAAACCATGTANACCTATTCTGGTACAACCTTAAAATACAGTTATGAACCT  
GAAAATGAGCATAATATGGGCGCTTTAAAACCGACCGGGAAATGGCGTCTCACTAT  
TGACTATCGGCCATTAACAAAACAGGTCCCCTCTCCCGTTGGCCCATGATCCACTT  
GGATCAGGAACCTGGCCAAGGTCAAAGAGGCCCCTTTCTTTTCAACGGTAGATGTGG  
CAAACGGTTTCTGGACCATGACGGTTGACCCGGTTGACCAGTACAAGCTGGCTTTCT  
CTTTCTGCAATCGCCAGTACACCTGGAACCGCTGCCCGTTCGGATATTCAAACCTCCC  
CAGCTGAGTTCAACATTTTCTCCACAAGGCAATGAGCGATGCCTCAGCCCGTGGAA  
ACCTCATCTACGTGGACGACATCCTCATGAGGAGTCGGTCCCTTCGATGACCACCTGG  
CCGAGATCCGTCACGTTCTTGGCCAGCTTGC GGCCG CAGGAGCAAACTGGCAATC  
GCCAAGGGCCAGTGGTGCCGCACCAAGGTAGAGTACGTGGGACTGACCGTGGGTGC  
CAATGGTATTGAGCCTAAAGCAGAAAGGATTTCGAGCTATCCAAGACATCATGGCCC  
CTGTGAACGTGTCAAACCTCCAGAGCTTTCTGGGAGTCTGTAACCTATTCCCGACAGT  
TCATCGCAGACTACGCAGAAATAGCCAGACCCCTCACAGAACTCCTCGGCAAAGAC  
AAACCGTTCCTGTGGGGTGAACCCCAAGAGCAGGCCTTCCGCCAAATGAAGGCAGA  
ACTCTGCTCCGCTCCCTGTCTGGCCTACCCGGACAAGGACAAGGAGTTCAACCTTGA  
GGCGAGTTTCTCCACCCAGTGCCTTAGTGCCGCCTTGGCCCAGAAATATGATGCAGA  
CAAACGGGTTCGTGGCTTACGCCAGCCGACCCCTTAGCAGCGTTGATATGAAGTTTTC  
CGACTGCGAGAAAGCCCTTCTGGCCACAGTGTGGGCGGTGGAACACTTCCACAGCT  
ATGTAGGGGGGCAAAGGTGGTCATTGAGACCTGTCACCAACTTGTACCTTCCTGA  
ACAGCCAGCGGCTTCGGGAAGGGCGGGTGTCCAATAGCCGCATCGCTCCTGGATG  
ATGGCGTTGCAAGGCTATGACATCGAGGTAAGTACGCTCAGAACCACAAGATGGC  
ACTGGGTCAAGGCCTGGCTGAGTGTCAACACTGCGACTGTGATGAGCAGCCAAGTC  
TCCAGTCCCTACTGGTACCACCCCGTCACTCCCGTCCAATCATCATTATTATGATGA  
AATGTTTNGTCAAGGCCTCCTTGAAGTCTATGTGGATGGATGCTCATTCCACCACGA  
AAGTCAGACTCAAGCTGGTGTGGGCATTTACTGGGTCAACTACCGCAGTGAGGAAC  
CCAGTCACTACCAACTTGGTCCCAAGACAAGCCAGTACGCAGAAATCGCTGCAGGG  
TTCATTGCGCTTCAACAAGCGGCCAGACAAAAGATCAGCCAACCTGGTGATCTGCTCT  
GACTCCAACCTATGCCCGCTACAGTTTCGTTGCACACTTTCCTGCGTGGAAAGAGAAA

GGTATGCTGAATGCCCGCAACAAAGAGATCAAGCACGCAAAACTTTTCCTTGCATGC  
GACCGACTGGTCTCACAGCAAGGAATGACCGTGTACTGGAGAAAGGTCAAGGGCCA  
TTCCCAAATCTCTGGTGGGGATAAGGAAGGAAATGATGAAGCTGACCGCCTGGCCA  
AACTGGGCGCAAGTCAAGGTACGCCCTGGGAGTTTCAGGAGGAGTGGCTTCCAGTC  
CCCCAACTCACGCTGTGAACGCAATCACTCGCCGTCAGGCCAGAGAGAGACGAGA  
AACTCTCAAGCCTGTGCGCAAACCCTAAATCTGTGTGCGCCAGCCTGAGGACACAG  
ACCTAATCACCATGCAGGAGAGGGACCCAGCTATTTGGGCCGTACGGCAGCTGCTA  
GCAAACCCCTCACCTCAAAACACCACTCAATCCTCACCAGGTGAGCCAGAGGAACT  
ACAAGCCTTCCGCCTCAACCCGCAGTCTTTCAGGATTGAGAAGGGTCTGTTGGTCTA  
CTCTGATGGTGTGATCAGGGACCGACACGGTGGGTCGTCCCCACTGACCACAGGGGGG  
TGATGTTAGCACACGCTCACGACTCTCCAGTGGGGGGCCATCGAGGCCCCCAACCC  
ACACTGGAAACCCTCCGACAAGTTGCCTATTGGCCGTCATGAGCCGCGATGTCAAG  
GCTTACGTTAAGGGATGTTTGGTCTGCTGCCAGTTCAGCCATCCCGGCCATTGGGT  
AGAGCCCCACTCCAGAAAAGGGGGGTACGTTCCCCTGGTCCCACCTCCAAGTGGA  
CTGGGTGGGCCCCGTACCCAGATCGTCAAGAGGAAATAAATACCTCCTCACGGTCA  
CATGCGCTTTTACAAAATGGGTGGAATGCCTTCCAGCACCCAACGACACGGCAACG  
ACCACAGCAGTCTTGCTACTAAACCATGTTTTAGTCGTTGGGGACTACCACTCTCC  
GTCAATTCGGATCAAGGCACCCATTTACGTCGGGGGTCATGACTGCAATGTATGAC  
ATTCTGGGAGTAAAAGCAAGATTCCACATCCCATATCACCCCAATCATCAGGCCAA  
GTGGAACGCGCTAACCGGACCATTGTCAACATGCTCAAGAAGTATGTCAATGGCAG  
CGCTAGGGATTGGGACGTGAAACTTCCCCTGGTACTGATGGCCATCAGGTCCACTCC  
ACACCGCACCACGGGGATCACTCCATTGAGATGATGACCGGGAGAGAGATGACGC  
TGCCACTGCATCTTGTACCACCCTGAAGATGTCAGTGTGCAACGGCCTACACTG  
CCACTCAATACGTCTCAAAATTGCGTGAACATCTTACGTCCACGTTTGCCTGGGCCC  
AAGAAAACCTGGAGACAAGGGTAAAGGGGGCCAAGGCGTACTACGACCGAAAGAC  
AACTCCCACGAGTATGAAATAGGTGACAAAGTCTTCTATTTACGGTTCACCAAACC  
GGTGAGAATCTCTCGAAAGTTCTACCGAGCTGGTCAGGCCAAGTTGAGATTGTGGG  
AAAACGTTCCCCGGTGGCGTACCGGATCAGATTGGCTAAGCCGAAACAGCCACCAA  
CCTACAAATGGGTCCATTCAAACCAAATCAAGCCATACGAGACGCCACCCCTCGTTT  
CAGAAAGGGAAAACCTCCCATCAGTAGAAAGGGGGAACAGCCCGACACAGACATA  
G

> Loki-Ape consensus sequence Pol protein

LGDLVRQGNARRIHTSVMLGSCVSIALLDSGSEISLMSSDTFSKVAKAMHLIGKPLQIEP  
CDVSITSYTQDRSPITKRAWVDITFKEMSLVHPIYICLLDTEPLLIGQDLLDRLAPLIDCHQ  
GHIWAQVKTPKPLCPSNNGPDGHVAVIQETHGDLPTLVASPRPTGDPASFTTSSPLWEDS  
SNPLRSHESEFLCSLANSNQELYRRVVGVEVQLNGLLISDARLALWLERTAVSQDLYHEL  
QKKDPPPVFSQRSHRVLSTHPQTLLKAVGVCALLVLIGRKRVFHFVSVVVDLHAPFFM  
GADLLVRLGAQLDTVNQVLWSRANAEHSLTTEPQQMTSGQTIPQACRVMSETVVTIP  
ARTAGVPIRLAICQGQKIPGPRAFFQPLPDFGKINLAVCGTPLLELDNRSAYLLVQNLTQ  
APIQVAARQLLGMIDHSFHDFFELTIPVIGEMPPSLDTNLDGVLFTYPTKMITVASDETQ  
NETICSTSLGKRGMVVYALVAQPGGSPDTGDKRQESPEEPYPGFSEIEQQLVKADAL  
TTEQQRNELRKLFEHFQPIFSKDSQDCGVTDIHTVRIPTDPGAAPTFRQYKIPLAAYESI  
QEILDKLLEKRIVRECNSTYNSPIWMLKCPYYEKNTFSGIWGVLLCLWCFHTHTNFEK  
NPSMLFXSEIWFLNVSCLQSPSELFKIGSDCDVTVRNELANHNRXARSVSMLTLMTLA  
CYVVLNSKALLQHTQVHHNLQKNYLHVRPHLEVSQILILPCNXPKLEKQPFYCLELASX  
HDLHLSYXACASAIKDSXEEDEKRSHSVAKTETRXKEDLQXERAVQYNKNMVFFEN

QTMXTYSGTTLKYSYEPENEHNMGALKPTGKWRLTIDYRPLNKQVPLSRWPMIHLDDQE  
LAKVKEARFFSTVDVANGFWTMTVDPVDQYKLAFSFCNRQYTWNRCPFGYSNSPAEF  
NIFLHKAMSDASARGNLIYVDDILMRSRSFDDHLAEIRHVLGQLAAAGAKLAIKQW  
CRTKVEYVGLTVGANGIEPKAERIRAIQDIMAPVNVSKLQSFLGVCNYSRQFIADYAEIA  
RPLTELLGKDKPFLWGEPQEQAFRQMKAELCSAPCLAYPDKDKEFNLEASFSTQCLSAA  
LAQKYDADKRVVAYASRPLSSVDMKFSDCCKALLATVWAVEHFHSYVGGQKVVIECT  
HQLVTFLNSQRLREGRVSNRSRIASWMMALQGYDIEVKYAQNHKMALGQGLAECQHCD  
CDEQPSLQSLLVTTPLSPSNHHYYDEMFXQGLLEVYVDGCSFHESQTQAGVGIYWVN  
YRSEEPSHYQLGPKTSQYAEIAAGFIALQQAARQKISQLVICSDSNYARYSFVAHFPAWK  
EKGMLNARNKEIKHAKLFLACDRLVSQQGMTVYWRKVKGHSQISGGDKEGNDEADRL  
AKLGASQGTPWEFQEEWLPVPQTHAVNAITRRQARERRENSQACAQTLNLCRQPEDTD  
LITMQRDPAIWA VRQLLANPSPQNTTQSSPGEPEELQAFRLNPQSFRIEKGLLVYSDGD  
QGPTRWVVPDHRGVMLAHAHDSVGGHRRGPQPTLETLRQVAYWPSMSRDVKAYVK  
GCLVCCQFQPSRPLGRAPLQKRGVTFPWSHLQVDWVGPVPRSSRGNKYLLTVTCAFTK  
WVECLPAPNDTATTTAVLLLNHVFSRWGLPLSVNSDQGTHFTSGVMTAMYDILGVKAR  
FHIPYHPQSSGQVERANRTIVNMLKKYVNGSARDWDVKLPLVLMAIRSTPHRTTGITPF  
EMMTGREMTLPLHLLYHPEDVSVATAYTATQYVSKLREHLQSTFAWAQENLETRVKG  
AKAYYDRKTTPEHEYEIGDKVFYFRFTKPVRI SRKFLPSWSGQVEIVGKRSPVAYRIRLAK  
PKQPPTYKWWHSNQIKPYETPPLVSERENSPSVERGNSPTQT\*

> Loki-Ape consensus sequence *env* gene

CTGTTCTGTTGCAGGATGGAACACTGTGGGTCCTTGGCATTCTTCTCGGGCTATCAA  
CCCCTCTCCCAACTGAGGTGGTTGAATCAGGCCCGTCCACCGGGATCGTCCTCCAGG  
GGGCGCCCGGACTGCTAATCACCCGTGGTCTCTTACCCAGAGAGTCTATGTACGAC  
TAGACCCCTGGGATGTCTACCGCAAACACATCGTTCTACCACCCCAATTGACCGAGG  
GACGGTTAAGTGGGATCCAGACCCATGACACAGTAGAACGCACTAACAGACCACT  
GCCACATTCTGGAACAACACTGCAAAAATTCATAGTCACAGAAGAAGACCTCAGTGG  
CCAGAAACGACCTAAACGTTTCTTAGGCGGCCTGCTCGTCGCAGCCTCAGCCATCGG  
GTCATTATTTTCTATTGGCCTGTCCGCGGCAAACACTCAGTTAGCCTCGGCGCACTCCAG  
AGACACATGGGGGAACTCGACCAAAAATGCCAGAGATCCAACAGAGACTCCTCCT  
CCAACAAGAACAGTTACAAAACCTGGGAAAACTTTCCAGGGGACCATAGTTACTG  
TACATTTGCACTCTGCCCTCCTGAATAACCCATGCATGCCTTAGAGAATTTGTCCA  
AAGTGGTCCAAGAAGACCTAACATACGTACGAATAGTCAGAGACCTAATGCAGGAC  
CTTGTACAGGGAGGTTAGCTCCTCAGTCAATAGCCTGAGCGCGGGAAAAATTCAGCC  
TATCTAGTCTCATTAGGACTCGTTGAACAAATCTTGAAATCCACCACTAGTACGGTA  
GTACACCCTTACAGGTACACCTGGCGTATAGCCTTGGCAGTGCAATCCCCATCTCA  
GTAGACTCTAAGA ACTTAGAGATAGGTTTCATCCTCAATCTTCCGATTCTAGAGAGA  
CAAAACATATACCGACTAAAGTCTGTACTGAACGTGGGCTTCTGGAAAGGTAACAC  
ACATATACACCTAAGACCCCAACCACAATTGCTTTCCATGAGGACAACCCCTCACT  
CTACCTCATTCTAACCTTAACATGTGCACTAAAACAACAAAAGACATTCCTGGGT  
CTGCCCGAGCAACCCATTCGTTAGAGATGTCACTAACTACCTCTGCGGCCTGAGGGC  
CGACACACCTGAACAAAAATGTCAGGGCAGTATGTCCATAAGGGACGAGGGAAACAG  
AAACAAGGGTGGAAACGGGCGGGTAACCGATGGCTCGTTAGTACACCCGTCCTGAA  
GCGTTAATGTCCTACGACCGTCATGACACAGCCACTAAGTTAACCTTACCTAACCAA  
ACGGTATTTTAAACGGTTCCCAAGGAGCTACCATTCATATCAATGACATTGTCCTCC  
ATCATCTCAATCCCGACAGACACGATGCCGAGATTGAGATCATGGACGCATTTGCGAG  
GCCACGACCTCACTATTGAATACCCCTCCAACAGCAACTTCTGGCTGAGGGGACTA

AACTGGTTCAGTTCAGCCTCAAACCTACTGGGCTTACTACCACGTTTTCCAACCATGT  
AGGGAGTTCGGCATCTTACCAAGACCACCCTGTTAGCATGGTTGCCTTGGGCCTCCT  
TCTTAGTGGCTGGATCATCACCGCGATAGTCGCACATTTTCATGTACAGACACATA  
GAATTTGCAAATAAATGACTCGATTCTGTTCTGTATCACCACGTTTCACACAGCA  
GCCACATCGTCCCCTAG

> Loki-Ape consensus sequence Env protein

LFCCRMELLWVLGILLGLSTPLPTEVVESGPSTGIVLQGAPGLLITRGLFTQRVYVRLDP  
WDVYRKHIVLPPQLTEGRLSGIQTHDTVERTKQTTAHILEQLQKFIVTEEDLSGQKRPKR  
FLGGLLVAASAIGSLFSIGLSAANSVSLGALQRHMGELDQKMPEIQRLLLQQEQLQNL  
GKTFQGTIVTVHLHSALLNNTMHALENLSKVQEDLTYVRIVRDLMQDLVREVSSSVN  
SLSAGKIPAYLVSLGLVEQILKSTTSTVVHPSQVHLAYSLSAIPISVDSKNLEIGFILNLPI  
LERQNIYRLKSVLNVGFWKGNTHIHLKTPPTIAFHEDNPSLYLIPNLNMCTKTTKDIHWV  
CPSNPFVRDVTNYLCGLRADTPEQKCGSMSIRDEGTETRVERAGNRWLVPVTEAL  
MSYDRHDTATKLTLPNQTVFLTPVQGATIHINDIVLHHLNPDRHDAEIEIMDAFRGHDLT  
IEYPLQQLLAEGTKLVQFSLKPTGLTTTFSNHVGSASYQDHPVSMVALGLLLSGWIIT  
AIVAHFMYRHIQNLQTKLDSILFVSPRFTQQPTSSH\*

>Loki-Pfl consensus sequence

AATGGCTGGTGGTGGAAACCTAACAGTTATGATCAAGACTGTTCTGTGAGGCCTGAAA  
CTTCCCTGTGGCCAAAGAGCGGCCTGTAGGGAAGTCACCAGCCTGTGACCCCTCACT  
CCTAAACAAAGGAGTCTCCAAAATGGAGATTGTACCTCCAAGACATGAGGAAAATG  
GCAGACTGGTGGAGGGTTTGAGAACTGCAACGACGGATTCTCACACCTTCGTGGAG  
TTCGGGATTTCTGATTGGCCGCGGCTCCTTGAACGCACCACTCGCCGCCAGCAGGCG  
GCGGAGGGAAGATAAAAATAGCCGGAGGTCACAGCCCAGGGTTCTTCGAGGTAATC  
CATTTGCCGCAAGGAGACGCATCGTTCAGCGCTGTTTCGAGAATCAACATTGTATCAT  
TCGCTGGTCGAGTTAGACATTTGTATCGTTCGTGGTACAACAGGGTCTGGTGGATA  
CGAAGCCCGTATTACACCAAATCTGCAGAGGGGTGAATCAGCCCCGTCTCGAGGAA  
AAGAGACAACGCGTTTTTCTTGCAGGTCGACTGGACCGTGTTCGCTCCACTGCCT  
TGGACGGTACGGGTCGTTAATCTCTGGCGAGAGTTAACTCAGTTTTGTTACCGGGA  
AATCCGCCGGATAAGCAACGGACTGTACACCAAAGTAAGAGGCTTTTATAGTTCT  
GGGCAGATTTGAGAACTAGGGTGTATTATAATGAGTAAAAGGTAAGTACTGCTAATTTTG  
TTTACCATTAATGTGTGATCGGACCCGCAAGGCGTCCTATGTGCTGTTGTGAAGAAT  
ATCACTGATCCAGATATTGTTGAAAGTTGTGTTGAACTGTAAGTACTGATACTCCCGCCG  
AGGAGAAATACTGTATACGCTGAGTCAGCTGCACGCTCAAAGAGTGTGCCGGGGA  
ACAAACGCTCTCTACCGTTAAACAAACCTCAGATTCTGCTCTAACGCCACGTTGAGT  
TAGAATCTCGAGTAAACGAAGAGAGCGGTTAGTCCCGTTACCCAGAGATCAAGG  
TTTTAAGTGTTTGTTCATATAAATTGTGTTTTCCCTCCTTTTGTTCCTTTCTTTCTTT  
TACACACACACACACACACACACACACACACACACACACACACACACACACACACAC  
AGCTAGTTAGCCACGTGGAGTAAGCTAGAGCTAACGCTTTAGCATAAACGTGTGCGT  
TGCTCGCAACCCCCACCTGAGCTTCTCCACCCCCCTTCGGGGCGCACCCAGTACCAC  
TACCGCCCTCTTGAGGCTAAATAGTTAGGTGTAGCTCACTGGAGTAGCCATTTTGT  
AGTTCATGGTAGACTACACTTCGACCCCCCCCCCTTTCACTCACTCACTCACACAC  
ACACACCCACACACGCCGCACAGACACAGAAGTGTCTCTGCTGCGTTGGGAGTTTCT  
TGCTGTGTTTTGATTGTGATATTGTAAAAGGGTATAGAAGTTTATTATTGAAGGATT  
GGTGATTGGCTACTGATAATTGTGATGTTTTAATAAATCTGATTATACTTTAAATAGC  
AGTTGCTTGTGATTATTTGTGTAATGACTGCTGGCTAGACAGGTCTGTG  
CTCGAAATCACCCCTCTTCTTTAATCCTTTCAAGGGATCTTAACAGAAATGAGAC

TGTTCCACAGTTGATCACTGGTCCCTGACTTACAGGGTGGTGCCCCGTTGAGTGTTTG  
TTGATTTGATAAAGTTATTAATAACCATATTCATAACTTTATTAATATTGATAAAACA  
TATTTTGATAATTTGCTAGTGATCAATCTGTACCCTACAAGAGAGAATCCAACATTT  
GACGCCCCGTGTGAGCCTCTTAGAGCCAGCATTGTTGCAGTGATTATACATAATAAT  
CCATAGTCTTTGAATATTAATATTA AAAAGAAAAAAAAAGATTATTTATTATTTATTTT  
TTAAATAAACAAATAAATTTTTCCGCAACCTGCCAAGTACATGTTTCAGTACAGTCAA  
TCCATAACCTTAAATTAAGTTTCTGTTTTGTAAAAGAAAAAGGGAATTAATGTTAAA  
GGACAACAGTTTGGAATTGATAAGTAAAAATTAGGTTCTTTTCGGTGAACCTCGCCA  
AGCATAACGTTTCAGCGGAAGTTGTGAATCTGTGTGTATTAGTGGCTAGGATTTTTCTTC  
GTTGTTTAGACAACAACACTCTTTGCATCCTACTTAACCTTGAAATCTCTGCCTAACA  
CCCTGACCCCTAAACAGTAAAACAGCTAGTTACTAGACCCAGACAAGATCTGATTAT  
AGCAATTAGGAAAGCTATCAGTCAACACGTAAACCTAGGAGCCACAGGTTAAAGCC  
TTCACCTGCGGGCTCGCGTCAACCTCTTACAAGCATTCTACAGTTGCGACAAGCAA  
TTGTAGCCACTGGTGATTGCCCTCTTGCTCAGCAGGTAAGAATGAGCGACCACAGTG  
ACCATGAGCTAACAGAAGAAGCTCAGACCGAGTCAATAGACACAGTCATAACAGAC  
ACAGTCTCTGCACTCATCCGTCTGCCCCAGCGGACAGAGTTTTCTGGAGGAATAC  
GAGGTTGGGACCTGTGAAACCAAACCTCAAGGAACTACTAGACTACGTGGATCAGCC  
CACCGGGAAGCCGGAGCTACCAAACAGACGTGCTTGGTCAAATAGTCCTTCTCC  
AGCAACGGAGATTCCACCTGCAGCTCACTGAGCTTCAGAGACACAGTCAAACCTCAA  
CAAGAGGCTATCCGCCGCTTGCGCCAAGAGATCCGGGACGCACACGATGCGTACTC  
TGATCTCCAGGCCGAGTGTGTTCTCCTGAAGCAACTGAAAATTGCTAAACAGCAAGG  
AGATGCAGGGGACGGGGACACTCAGACCAACCGGGTAAGTACAGAAGCGGCGGAA  
TTCACAACGAAGACTGGCGACTCGGACGACGAGCGGGCCGCAGGGATAATTTCTTA  
TCGGTCTCAACCCGCCAGCGAAGGTGTACCCCGGATTGGAGGATCATCGACCAAG  
AGAAACCCTCCTCCAGTGGAGGGAGGAAAATGGCTCCACCATCAGAAGGGTAAGT  
TATCAGCCCCCAAGGCCGAAGAACATTCCGGAGTTTCGGGTCTCAAGGAAAGAGGA  
TCACTCCCCTGTTTCGGTTGAAAAGAGAAGAAGTTTCATGCAGCCGAAGAGATGATTA  
CTCTCCTGCTTGGCCGAAAAAGGAGGGAGTCTCCCGCAGCAGAAGAGATGACGACT  
CTCCTGTTTCAGCCGAGAAAGGAGGAAGTCTCCCGCAGCAGGAGAGATGACGACTCT  
CCTGTTTCGGTCAAGAAGGGAGGAAGTCTCCCGCAGCAGGAGAGATGACGACTCTCC  
TGTTTCGGTCAAGAAGGGAGGAAGTCTCCCGCAGCAGGAGAGATGACGACTCTCCTG  
CTCGGTCAAGAAGGGAGGAAGTCTCCCGCAGCAGGAGAGATGACGACTCTCCTGTT  
CGGTCAAGAAGGGAGGAAGTCTCCCGCAGCAGGAGAGATGACTACTCTCCTGTTTCG  
GTCAAGAAGGGAGGAAGTCTCCCGCAGCAGGAGAGATGACGACTCCCCTGTCCGGT  
CGAGGAGGGAGGAGCTCTCCCGTAACAGGAGAGATGAGGAGGGATGATTACTCCCC  
TGCTCGGCCAGGAAGGGACCGCCACTCGGTCAACAACGGGGAGGAGCCGACAAGGA  
GGTGACTACCGCACCTCAGACGACTCTGATGAAAGTCTGAGGGAGAGGTCCCGTTC  
CTCTGCCTGGAAGGATCTGAGTCAGCCTCAACGGAAAACCCACCGTCAACACCGGA  
GAGGGAGAGGCAGCGGTACTTCCAGTGACTCTGACGCCTCACGCCACTCCCCAGCG  
CAGGGCCTGCGCATGCGCCAGATTGACTCCTTCGCAAGGGAGCTAGAGCGTTTCGA  
CCCCAACAGTCGAGAACTAATGTGACGACTATCTCCGCGATGTAGAACGGGTCC  
TGTCAGACCTCCCCAATGCAACGTCGCGCGAGAAGCGCAAACACTCTGGAAGACC  
ACGGCAAGGAGCGCCCATGTCTTTATGGACGAACTCCCGCCCTCGACCTTAAACAGT  
TACACAAAGCTCTGCCAAGCTTTACGAGAAGAGTTCGCCCTGTACACCGACCCAGCT  
GCGGCCATCCAGGGAGCATATGCCATTGTGCATAAGAGGAATGAGGCCCCGAGGGA  
ATATTATAGGCGTCTAAGGACCGTTTACTTCCAGGGCCGCCGCTCCCAGGTCTAGA



GGAAGACCCCGCTTTCCAATCCCTGTTTCGTACACAATCTCCACGATGCTGTACGGTA  
CGATGTGCAGATGCATTGTAGAACACAAGAGCTACCCATGAAAGAGATTAGGATGT  
TCGCACAAAGGGTGTGGGAGGCTCGAACACGACCGATCAGGAAAGGTGAGGAGGA  
GCCGAGGGTACTACACATCCAGACCTCAGAGAACGCAGATCTAGCCCTCGAAGGGA  
ACGAAGTTCCCCAGGGAACAGGGGACTCCAGACCACAAACCAGGAACAACGATCC  
TACCACACAGGCAGGCAAAATCGACAAAACAACACTACAGAGGGAAGAAGAAGCCCT  
ATGGTGGAAAGAAAACCCGGTAAGTATGAGGGAGGACCTCAAAGCCAGGAAAAGGA  
TGACGGTCGTAATGCCTCCCCAGCACAGCAGCAGGCCCTCCGAAGGGACCTGAGA  
CCACCTCCCAACCCGCGCGACTAAGCCAAGCGCCCGTTTCACTACCCGCCAAGGTGT  
TCTTCATAGGGTGGGGAAACACGCCAGACAGTCTCCAGAGTCTGTCACTCCTCTTC  
CTCCTGCGGCTTCCAGGGTTTTCTTGGGCGACCTGGTCCATCGGGGCAACGCGCGCC  
GCATCCACACGTCAGTGATGCTTGGTAGCTGTGTCAAGTATTCTTGCATTGTTGGACTC  
TGGCTCTGAAATAAGCCTGATGAGTTCGGACACTTTCTCAAAGGTGGCTAGAGCAAT  
GCACCTCATTGGCAAACCCCTTCAAATCGAGCCCTGCGACGTTAGCATCACCAGCTA  
CACGCAGGACAGGTCACCCATCACGAAGCGTGCTTGGGTTGACATAACTTTCAAAG  
AAATGTCTCTTGTACACCCCATTTACATCTGCCTTCTTGACACCGAACCTCTGCTCAT  
TGGCCAAGATCTCCTAGATCGACTGGCACCGCTCATCGACTGCCATCAGGGTCATAT  
CTGGGCTCAGGTGAAAATCTCCTTCCCCTCTGGGGAAGGAGAGTTCGAACCCCTCTCC  
GCGGTCATGGTCTTTCCTTTGTTCCCTTAGAAAACACCAACCAGGAGCTGTATAGTCC  
CAGCGTGGTCAGGAAAGTCCAGCTCAACGGTCTTCTCATATCGGACGCGCGTCTGGC  
GCTCTGGTCTGAGAGAACC GCGGT CAGCCAGGACCTGTACCACGAACTTCAAAGC  
GAGACCACCCCCAGTTTTCTCCCAACGTAGCCACCGTGTTCTGTTCGGCAACACACC  
CACAAACCCCTCCTCAAGGCCGTGGTGTATGTGCCCTCTTGGTACTGATTGGGAAAA  
AAAGGGTGTTCATTTTGCCAGTGTGGTACCCGACCTACATGCCCCGTTCTTCATGG  
GGGCGGACCTTCTGGTCAGGCTCGGGGTCCAGTTAGACACGGTCAATCAGGTTTTGT  
GGTCACGAGCCAATGCAGAAGCTCATTCCCTAACCACCGAACACAGCAAATGACT  
TCGGGGCAGACCATTCCCAAGCCTGCCGGGTAAATGAGTGAAACTGTGGTGACCAT  
CCCAGCACGGACTGCCGGTGTTCATCCGTCTTGCAATCTGTCAAGGCCAGAAGAT  
ACCTGGCCCTCGGGCTTTCTTCCAGCCGTTGCACGGTTTTTTGGGAACTGAACTTGGCC  
GTCTGTGGCACGCCCTGCTTGAATTGGACAATCGTTCAGCCTACCTCCTTGTTCAGA  
ATCTTACGCAAGCTCCGATCCAGGTTGCAGCACGGCAACTCCTGGGGATGCTGATCG  
ACCACTCTTTTCATGATTTTGAAGTACCATTCCAGTCATAGGGGAGATGCCCCCAT  
CTTTGGACACCAATCTTGACGGTGTCTCTTCACTTACCCAATAAAATGATCACCGT  
TGCCAGTGACGAAACGCTACAGAACGAAACAATCTGCAGCACAAGTTTAGGCAAAA  
GAGGGGACATGGTGGTGTATGCCCTGGTGGCACAACCAGGAGGGTCCCCAGATACT  
GGTGACAAAAGACAGGAGTTACCAGAGGAACCGTACCCTGGGTTTCGAGTCTGAGAT  
TGAGCAGCAGCTGGGGAAAGCAGATGCCCTGACAACAGAACATCAGCGGAACGAG  
CTCCGGAAACTATTTTCATGAGTTCAGCCAATCTTCTCAAAGACTCCCAGGATTGC  
GGAGTCACGGACATCCACACTGTTTCGATTCCCACCGATCCAGGCGCAGCACCCACC  
TTTGTACGCCAGTACAAAATCCCCTTGGCCGCCTATGAATCGATCCAAGAGATCCTC  
GACAAGCTGTTGGAAAAACAGATTGT CAGGGAATGCAACTCCACATAACAATTCACC  
CATTTGGCCGGTGTAAAACCGACCGGGAAATGGCGCCTCACTATTGACTATCGGCC  
ATTAACAACAGGTCCCCTCTCCCCTTGGCCCATGATCCACTTGGATCAGGAACT  
GGCCAAGGTCAAAGAGGCCCGGTTCTTTTCAACGGTGGACGTGGCAAACGGGTTCT  
GGACCATGAGGGTCGACCCAGTGGACCAGTACAAGCTGGCTTTCTTTCTGCAATC  
GCCAGTACACCTGGAACCGCTGCCCGTTCGGATATTCAAACCTCCCAGCTGAGTTCA

ACATCTTCCTCCACAAGGCAATGAGCGATGCCTCAGCCCGTGGAAACCTCATCTACG  
TGGATGATATCCTCATGAGGAGTCGGTCCTTCGATGAACACCTGGCCGAGATCCGTC  
ACATTCTGGGCCAGCTTGC GGCCG CAGGAGCAAACTGGCAATTACCAAGGGCCAG  
TGGTGCCGCACCAAGGTAGAGTACGTGGGGCTGACCGTGGGTGCCAATGGTATTGA  
GCCTAAAGCAGAAAGGATGCGAGCTATCCAAGACATCATGGCCCCTGTGAACGTTT  
CAAACTCCGGAGCTTTCTGGGAGTCTGTA ACTATTCCCAGAGTTCATCGCAGACT  
ACGCAGAAATAGCCAGACCCCTCACAGA ACTCCTCGGCAAAGACAAACCGTTCCTG  
TGGGGTGAACCCCAAGAGCAGGCCTTCCGCCAAATGAAGGCAGA ACTCTGCTCCGC  
TCCCTGTCTGGCCTACCCGGATAAGGACAAGGAGTTCAACCTTGAGGCGAGTTTCTC  
CACCCAGTGCCTTAGTGCCGCCTTGGCCCAGAAATATGATGCAGACAAACGGGTCTG  
TGGCTTACGCCAGCCGACCCCTCAGCAGCGTGGAGATGAAGTTTTCCGACTGCGAG  
AAAGCCCTTCTGGCCACAGTGTGGGCGGTGGAACACTTCCGCAGCTACGTAGGAGG  
GCAAAAGGTGCTCATTGAGACCTGCCACCAACCGGTCACCTTCTGAACAGCCAGC  
GGCTTCGGGAAGGGCGGGTGTCCAACAGTCGCATCGCCTCCTGGATGATGGCGTTG  
AAGGCTATGACATCGAGGTAAGTATGCTCAGAACCACAAGATGGCACTAGGTCAA  
GGCCTGGCTGAGTGTCAACACTGCGACTGTGATGAACAGCCAAGCCTCCAGTCCCTTA  
CTGGTCACCACCCCATCACTCCCGTCCAACCATCATTATTATGATGAAAATGTTTGT  
AAGGCTCCGTGAAGTCTATGTGGATGGCTCATTCCACCACGAAAGTCAGACTCAAG  
CTGGTGTGGGCATTTACTGGGTCAAGTACCGCAGTGAGGAACCCAGTCACTACCAAC  
TTGGTCCCAAGACCAGCCAGTATGCGGAAATCGCTGCAGGGTTCATTGCGCTTCAAC  
AAGCGGCCAGACAAAAGATCAGTCAGCTGGTGATCTGCTCTGACTCCA ACTATGCC  
CGCTACAGTTTCATTGCACACTTTCCTGCGTGGAAAGAGAAAGGTATGCTGAATGCC  
CGCAACAAAGAGATCAAGCACGCAAAACTTTTCCTCGCATGCGACCGACTGGTCTC  
ACAGCAAGGAATGACCGTGTACTGGAGAAAGGTCAAGGGCCATTCCCAAATCTCTG  
GTGGGGATAAGGAAGGAAACGATGAAGCTGACCGCCTGGCCAAACTGGGCGCAAG  
TCAAGGTACGCCCTGGCAGTTTCAGGAGGAGTGGCTTCCAGATTCCCAA ACTCACGC  
GGTGAATGCAATCACTCGCCGT CAGGCCAGAGAGACGAGAAAATTCTCAAGCCG  
GTGCGCAAACCTAAATCTGTGTGCCAGCCTGAGGACACAGACCTAATCACCATG  
CAGGAGAGGGACCCAGCTATCTGGGCCGTTCCGGCAGCTGCTAGCAAACCCCCACC  
GCAAAACACCACTCAACCCTCACCAGGTGAGCCAGAGGAACTATANGCCCTCCGCC  
TCAACCCGCAGTCTTTCAGGATTGAGAAGGGTCTGTTGGTCTACTCTGATGGTGATC  
AGGGACCGACAAGGTGGGTCTGCCCACTCACCACAGGGGGTTGATGTTAGCACAC  
GCTCACGACTCGCCAGTGGGGGGCCATCGAGGCCCCCAACCCNTGGAAACCTCCG  
GCAAGTTGCCTATTGGCCGTCAACGAACCGCGATGTCAAAGCTTACGTTAGAGGATG  
TCTGGTCTGCTGCCAGTTCAGCCGTCCCAGCCATTGGGTAGAGCCCCGCTCCAGAA  
AAGGGGGGTACGTTCCCCTGGTCCCACCTCCAAGTGGACTGGGTGGGCCCCGTACC  
CAGATCGTCAAGAGGAAATAAATACCTCCTCACGGTCACATGCGCTTTTACAAAATG  
GGTGAATGCCTTCCAGCACCCAACGACACGGCAACGACCACAGCAGTCTTGCTAC  
TAAACCATGTTTTAGTCGTTGGGGACTACCCCTTTCCGTTGATTCGGATCGAGGCA  
CCATTTACGTCCGGGGT CATGACTGCAATGTATGACATTCTTGGAGTAAAAACAA  
GATTCACATCCCATATCACCCCAATCATCAGGCCAAGTGGAAACGCGCTAACCGG  
ACCATTGTCAACATGCTCAAGAAGTATGTCAATGGTAGCGCTAGGGATTGGGACGT  
GAAACTTCCCCTGGTACTGATGGCCATCAGGTCCACTCCACACCGCACCCAGGGGAT  
CACTCCATTCGAGATGATGACCGGAAGAGAGATGACGTTGCCACTGCATCTCTTGTA  
CCACCCTCAAGATGTCAGTGTCTCAACGGCATACTGCCACTCAATACGTCTCGAA  
ATTGCGGAACATCTTCGGTCCACATTTGCCTGGGCCCAAGAAAACCTGGAGACAA

GGGCAAAGGGGGCCAAGGCGTACTACGACCGAAAGACAACCTCCCCGCGAGTATGA  
AATAGGTGACAAAGTCTTCTATTTTCAGGTTACCAAACCGGTGGGAATCTCTCGAAA  
GTTCTACCAAGCTGGTCAGGCCAGTTGAGATTGTGGGAAAACCTTTCCCCGGTGGC  
GTACCGGATCAGATTGGCTAAGCCGAAACAGCCACCGACCTACAAATGGGTCCATT  
CAAACCAAATCAAGCCATACGAGGCGCCACCCCTCCCCACAGAAGGGGAAAACCTCC  
CCATCAGCAGAAAGGGGGGAACAGCCCAACACAGACATAGGAATAACTGCATGACC  
AATCACTTCCGCGAGCATGCACTAACCCCTAAAAGAAATCCCCTGTCCACCTAGTAA  
TCAAAACTCTGTTCTGTTGCAGGATGGAGCTACTGTGGGTCTTTGGCAATCTCCTCG  
GGCTATCAACCCCTCTCCCAACTGAGGTGGTTGAATCAGGCCCGCCACCGGGATCG  
TCCTCCAGGGGACGCCCGGACTGCTAATCACCCGGTGTGGTCTCTTCACCCAGAGAG  
TCTATGTACGACTAGACCCCTGGGATGTCTACCGCAAACACATCGTTCTACCACCCC  
AATTGAGCGAGGGACGGTTAAGTGGGGTCCAGACCCACGACATAGTAGAACGAGCT  
AAACAGACCACTGCCACATTCTGGAACAATTGCAAAGTTCATAGTACAGAGA  
AGACCTCAGTGGCCAGAGACGACCTAACGTTTCTTAGGCGGCCTGCTCGTCGCAGC  
CTCAGCCATCGGGTCATTATTTTCTATTGGCCTGTCCGCGGCCAACTCAATTAGCCTC  
GGCGCGCTCCAGAGACACATGGGGGAACCTCGACCAAGAAATGCCAGAGATCCAAC  
AGAGACTCCTCCTCAACAAGAAGACAGTTACAAAACCTAGGAAAAACTTTCCAGGGG  
ACCATAGTTACTGTAAATTTGCACTCTGCCCTCCTGAATAACACCATGCATGCCTTA  
GAGAATTTGTCCAAAGTGGTCCAAGAAGACCTAACGTACGTCCGCATAGTCAGAGA  
CCTAATGCAGGACCTTGTGAGGGAGGTTAGCTCCTCAGTCAACAGCCTGAGCGCGG  
GAAAAATTCCAGCTTACCTAATCTCATTAGGACTCGTCGAACAGATCTTGAAATCCG  
CCACTAGTACGGTAGTACACCCTTCACAGGTACACCTGGCGGTATAGCCTTGGCAGTG  
CAATCCCCATCTCAGTAGACTCTAAGAACTTAGAGATAGGCTTCATCCTCAATCTTC  
CGATTCTAGAGAGACAAAACATATACCGACTAAAGTCTGTACTGAACGTGGGCTTCT  
GGAAAGGTAACACACACGTACACCTTAAGACCCCAACCACAATTGCTTTCCATGAG  
GACAACCCCTCACTCTACCTCATTCTAACCTTAACATGTGCACTAAAACAAAAGAC  
ATACACTGGGTCTGCCCCGAGCAACCCATTTCGTTAGAGATGTCACCTAACTACCTCTGC  
GGCCTGAGGGCCGACACACCTGAACAAAATGTGAGGGCAGTATGTCCATAAGGGA  
CGAGGGAACAGAAACGAGGGTGAACGGGGCGGGTAACCGATGGCTCGTCAGTACA  
CCCGTCACGGAAGCGTTAATGTCCTACGACCGTCATGACACAGCCACTAAGTTAACT  
TTACCTAACCAAACGGTATTTTTAACAGTTCCCCAAGGAGCTACCATTATATCGAT  
GACATTGTCTCCATCATCTCGATCCCGACAGACACGATGCCGAGATTGAGATCACG  
GACGCATTTTCGAGGCCACGACCTCACTATTGAATACCCCTCCAACAGCAACTTCTG  
GCTGAGGGGACTAAACTGGTTCAGTTCAGCCTCAAACCTACGGGGCTTACCACCAC  
GTTTTCCAACCATGTAGGGAGTTCGGCGTCTTACCAAGACCACCCTGTTAGCATGGT  
TGCCTTGGGCCTCCTTCTTAGTGGCTGGATCATCACCGCGATAGTCGCACATTTTCATG  
TACAGACACATACAGAAATTTGCAAACCTAACTTGACTCGATTCTGTTTCGTATCACCA  
CGTTTCACACAGCAGACCACATCATCCACTAGTCAGCGCCAGTCCTTTTTCAGGGAT  
AGGTTAGTGACACCCAAATGATCTCTCACACCCTGTCCCTTTCTTCTTTTTTTTTTTT  
TTCTTTATCTCTCAACTTTTCGTTTTGGCATTATACCATAAGGTGCATTATGAGGGGGC  
ACGCAGTCTTACCTGCTTCTTGAAGTATTTTCCAAGTGTATTAGTGTGATGATTTTT  
AGTAGTAGTTATGATTTATACAAGGTTTAAATCGTAGTTAGAAAGTCTGCCAGACG  
CTGCCTCAGAGTCTGCCAGACACTATAGCCTCAGTAACCAGATGAACACTATGAAC  
TGTTTGCCATTCCAGGAATGAATGATGCTATGTTGCTTTCAGAATAACTCTTGTTT  
GTTTACATAACCTGTTGGTCCATGGTTGCTCCAAAGAGCGGGGTTCAACCTGCTCTT  
CAGACCAAAGGGGGACTGTTGGAACCTAACAGTTATGATCAAGACTGTTCTGTGA

GGCCTGAAACTTCCCTGTGGCCAAAGAGCGGCCTGTAGGGAAGTCACCAGCCTGTG  
ACCCCTCACTCCTAAACAAAGGAGTCTCCAAAATGGAGATTGTACCTCCAAGACAT  
GAGGAAAATGGCAGACTGGTGGAGGGTTTGAGAACTGCAACGACGGATTCTCACAC  
CTTTGTGGAGTTCGGGATTTCTGATTGGCCGCGGCTCCTTGAACGCACCACTTGCCG  
CCAGCAGGCGGCGGAGGGAAGATAAAAATAGCCGGAGGTCACAGCCCAGGGTTCTT  
CGAGGTAATCCATTTGCCGCAAGGAGACGCATCGTTCAGCGCTGTTTCGAGAATCAAC  
ATTGTATCATTTCGCTGGTCGAGTGAGACATTTGTATCGTTCGTGGTACAACAGGGTC  
CTGGTGGATACGAAGCCCGTATTACACCAAATCTGCAGAGGGGTGAATCAGCCCCG  
TCTCGAGGAAAAGAGACAACGCGTTTTTCTTGCAAGTCGACTGGACCGTGTTCGCGC  
TCCACTGCCTTGGACGGTACGGGTCGTTAATCTCTGGCGAGAGTTAACTCAGTTTTG  
TTCACCGGAGAATCCGCCGGATAAAGCAACGGACTGTACACCAAAGTAAGAGGCTT  
TTATAGTTCTGGGCAGATTTGAGAACTAGGGTGTTTATTAATGAGTAAAAGGTACTG  
CTAATTTTTGTTTACCATTAATGTGTGATCGGACCGCTGCGTCCTATGTGCTGTTGTG  
AAGAATATCACTGATCCAGATATTGTTGAAAGTTGTGTTGAACTGTAACCTGATACTC  
CCGCCGAGGAGAAATTACTGTATACGCTGAGTCAGCTGCACGCTCAAAGAGTGTGC  
CGGGGAACAACGCTCTCTACCGTTAAACAAACCTCAGATTCTGCTCTAACGCCACG  
TTGAGTTAGAATCTCGAGTAAAACGAAGAGAGCGTTTAGTCCCGTTACCCAGAGAT  
CAAGTTTTTAAGTGTGTTTCCATAAATCGTGTGTTTCCCTCCTTTTCTTTCTTTT  
CTTTTTACACACACACACACACACACACACACACACACACACACACACACACACAC  
AGCCACGTGGAGTAAGCTAGAGCTAACGCTTTAGCATAAACGTGTGCGTTGCCTCGC  
AACCCCCACCTGAGCTTCTCCACCCCCCTTCGGGCGCACCCAGTACCACTACCGCCC  
TCTTGAGGCTAAATAGTTAGGTGTAGCTCACTGGAGTAGCCATTTTAGTAGTTCATG  
GTAGACTACACTTCGACCCCGCCCCCTTCACTCACTCACTCTCACACACACAC  
CCACACACACGCCGCACAGACACAGACGTGTCTGTGCTGCGTTGGGAGTTTCTTGCT  
GTGTTTTGATTGTGATATTGTAAGGGTATAGAAGTTTATTATTGAAGGATTGGTG  
ATTGGCTACTGATAATTGTGATGTTTTAATAAATCTGATTATACTTTAAATAGCAGTT  
GCTTGTGATTATTTGTGTACTTACTGTAATGACTGCTGGCTAGACAGGTCTGTGCTCG  
AAATCACCCCTCTTCTTTAAATCCTTTCAAGGGATCTTAACAGAAATGAGACTGTT  
CCACAGTTGATCACTGGTCCCTGACTTACAGGGTGGTGCCCCGTTGAGTGTGTTGTCG  
ATTTGATAAAGTTATTAATAACCATATTCATAACTTTATTAATATTGATAAAACATAT  
TTTGATAATTGCTAGTGATCAATCTGTACCCTACAAGAGAGAATCCAACACTGGT  
> Loki-Pfl consensus sequence 5'LTR

TGTTGGAACCTAACAGTTATGATCAAGACTGTTCTGTGAGGCCTGAAACTTCCCTGT  
GGCCAAAGAGCGGCCTGTAGGGAAGTCACCAGCCTGTGACCCCTCACTCCTAAACA  
AAGGAGTCTCCAAAATGGAGATTGTACCTCCAAGACATGAGGAAAATGGCAGACTG  
GTGGAGGGTTTGAGAACTGCAACGACGGATTCTCACACCTTCGTGGAGTTCGGGATT  
TCTGATTGGCCGCGGCTCCTTGAACGCACCACTCGCCGCCAGCAGGCGGCGGAGGG  
AAGATAAAAATAGCCGGAGGTCACAGCCCAGGGTTCTTCGAGGTAATCCATTTGCC  
GCAAGGAGACGCATCGTTCAGCGCTGTTTCGAGAATCAACATTGTATCATTTCGCTGGT  
CGAGTTAGACATTTGTATCGTTCGTGGTACAACAGGGTCCTGGTGGATACGAAGCCC  
GTATTACACCAAATCTGCAGAGGGGTGAATCAGCCCCGTCTCGAGGAAAAGAGACA  
ACGCGTTTTTCTTGCAAGTTCGACTGGACCGTGTTCGCTCCACTGCCTTGGACGGTA  
CGGGTCGTTAATCTCTGGCGAGAGTTAACTCAGTTTTGTTTACCGGGAAATCCGCCG  
GATAAAGCAACGGACTGTACACCAAAGTAAGAGGCTTTTATAGTTCTGGGCAGATTT  
GAGAACTAGGGTGTGTTATTAATGAGTAAAAGGTACTGCTAATTTTTGTTTACCATTA  
ATGTGTGATCGGACCCGCAAGGCGTCCTATGTGCTGTTGTGAAGAATATCACTGATC

CAGATATTGTTGAAAGTTGTGTTGAACTGTAAGTACTGATACTCCCGCCGAGGAGAAATT  
ACTGTATACGCTGAGTCAGCTGCACGCTCAAAGAGTGTGCCGGGGAACAAACGCTC  
TCTACCGTTAAACAAACCTCAGATTCTGCTCTAACGCCACGTTGAGTTAGAATCTCG  
AGTAAAACGAAGAGAGCGGTTAGTCCCGTTACCCAGAGATCAAGGTTTTAAGTGT  
TTGTTTCCATAAATTGTGTTTTCCCTCCTTTTGTTCCTTTTCGTTTCTTTTTACACACACA  
CACACACACACACACACACACACACACACACGCACACATACCTCCAAGCTAGTTAG  
CCACGTGGAGTAAGCTAGAGCTAACGCTTTAGCATAAACGTGTGCGTTGCCTCGCAA  
CCCCACCTGAGCTTCTCCACCCCTTCGGGCGCACCCAGTACCACTACCGCCCTC  
TTGAGGCTAAATAGTTAGGTGTAGCTCACTGGAGTAGCCATTTTAGTAGTTCATGGT  
AGACTACACTTCGACCCCCCCCCCTTCACTCACTCACTCACACACACACACCA  
CACACGCCGCACAGACAGAAAGTGTCTCTGCTGCGTTGGGAGTTTCTTGCTGTGTT  
TTGATTGTGATATTGTAAAAGGGTATAGAAGTTTATTATTGAAGGATTGGTGATTGG  
CTACTGATAATTGTGATGTTTTAATAAATCTGATTATACTTTAAATAGCAGTTGCTTG  
TGATTATTTGTGTAAGTACTGTAATGACTGCTGGCTAGACAGGTCTGTGCTCGAAATC  
ACCCCTCTTCTTAAATCCTTTCAAGGGATCTTAACAGAAATGAGACTGTTCCACA  
GTTGATCACTGGTCCCTGACTTACAGGGTGGTGCCCCGTTGAGTGTTTGTGATTGTA  
TAAAGTTATTAATAACCATATTCATAACTTTATTAATATTGATAAAACATATTTTGAT  
AATTTGCTAGTGATCAATCTGTACCCTACAAGAGAGAATCCAACA

> Loki-Pfl consensus sequence 3'LTR

TGTTGGAACCTAACAGTTATGATCAAGACTGTTCTGTGAGGCCTGAAACTTCCCTGT  
GGCCAAAGAGCGGCCTGTAGGGAAGTCACCAGCCTGTGACCCCTCACTCCTAAACA  
AAGGAGTCTCCAAAATGGAGATTGTACCTCCAAGACATGAGGAAAATGGCAGACTG  
GTGGAGGGTTTGAGAACTGCAACGACGGATTCTCACACCTTTGTGGAGTTCGGGATT  
TCTGATTGGCCGCGGCTCCTTGAACGCACCACTTGCCGCCAGCAGGCGGCGGAGGG  
AAGATAAAAATAGCCGGAGGTCACAGCCCGGGGTTCTTCGAGGTAATCCATTTGCC  
GCAAGGAGACGCATCGTTCAGCGCTGTTTCGAGAATCAACATTGTATCATTTCGCTGGT  
CGAGTGAGACATTTGTATCGTTCGTGGTACAACAGGGTCTGGTGGATACGAAGCCC  
GTATTACACCAAATCTGCAGAGGGGTGAATCAGCCCCGTCTCGAGGAAAAGAGACA  
ACGCGTTTTTCTTGCAAGTCGACTGGACCGTGTTCGCTCCACTGCCTTGGACGGTA  
CGGGTCGTTAATCTCTGGCGAGAGTTAACTCAGTTTTGTTACCCGGAGAATCCGCCG  
GATAAGCAACGGACTGTACACCAAAGTAAGAGGCTTTTATAGTTCTGGGCAGATTT  
GAGAACTAGGGTGTATTATTAATGAGTAAAAGGTAAGTACTGCTAATTTTTGTTTACCATTA  
ATGTGTGATCGGACCGCTGCGTCCTATGTGCTGTTGTGAAGAATATCACTGATCCAG  
ATATTGTTGAAAGTTGTGTTGAACTGTAAGTACTGATACTCCCGCCGAGGAGAAATTACT  
GTATACGCTGAGTCAGCTGCACGCTCAAAGAGTGTGCCGGGGAACAAACGCTCTCT  
ACCGTTAAACAAACCTCAGATTCTGCTCTAACGCCACGTTGAGTTAGAATCTCGAGT  
AAAACGAAGAGAGCGTTTAGTCCCGTTACCCAGAGATCAAGGTTTTAAGTGTGTTGT  
TTCCATAAATCGTGTTTTCCCTCCTTTTCTTTCTTTTCTTTTACACACACACAC  
ACACACACACACACACGCACACATACCTCCAAGCTAGTTAGCCACGTGGAGTAAGC  
TAGAGCTAACGCTTTAGCATAAACGTGTGCGTTGCCTCGCAACCCACCTGAGCTT  
CTCCACCCCTTCGGGCGCACCCAGTACCACTACCGCCCTCTTGAGGCTAAATAGT  
TAGGTGTAGCTCACTGGAGTAGCCATTTTAGTAGTTCATGGTAGACTACACTTCGAC  
CCCGCCCCCTTCACTCACTCACTCTCACACACACACCCACACACACGCCGCAC  
AGACACAGACGTGTCTCTGCTGCGTTGGGAGTTTCTTGCTGTGTTTTGATTGTGATAT  
TGATAAAGGGTATAGAAGTTTATTATTGAAGGATTGGTGATTGGCTACTGATAATTG  
TGATGTTTTAATAAATCTGATTATACTTTAAATAGCAGTTGCTTGTGATTATTTGTGT

ACTTACTGTAATGACTGCTGGCTAGACAGGTCTGTGCTCGAAATCACCCCCTCTTCTT  
TAAATCCTTTCAAGGGATCTTAACAGAAATGAGACTGTTCCACAGTTGATCACTGGT  
CCCTGACTTACAGGGTGGTGCCCGTTGAGTGTGGTTCGATTTGATAAAGTTATTAAT  
AACCATATTCATAACTTTATTAATATTGATAAAACATATTTTGATAATTTGCTAGTGA  
TCAATCTGTACCCTACAAGAGAGAATCCAACA

> Loki-Pfl consensus sequence *mscramm* gene

CTGCGGGCTCGCGTCAACCTCTTCAACAAGCATTCTACAGTTGCGACAAGCAATTGTA  
GCCACTGGTGATTGCCCTCTTGCTCAGCAGGTAAGAATGAGCGACCACAGTGACCAT  
GAGCTAACAGAAGAAGCTCAGACCGAGTCAATAGACACAGTCATAACAGACACAGT  
CTCTGCACTCATCCGTCTGCCCCAGCGGACAGAGTTTTCTGGAGGAATACGAGGT  
TGGGACCTGTGAAACCAAACCTCAAGGAACACTAGACTACGTGGATCAGCCCACCG  
GGAAGCCGGAGCTACCAAACCAGACGTGCTTGGTCAAATAGTCCTTCTCCAGCAA  
CGGAGATTCCACCTGCAGCTCACTGAGCTTCAAGACACAGTCAAACCAACAAGA  
GGCTATCCGCCGCTTGCGCCAAGAGATCCGGGACGCACACGATGCGTACTCTGATCT  
CCAGGCCGAGTGTGTTCTCCTGAAGCAACTGAAAATTGCTAAACAGCAAGGAGATG  
CAGGGGACGGGGACACTCAGACCAACCGGGTAAGTACAGAAGCGGCGGAATTAC  
AACGAAGACTGGCGACTCGGACGACGAGCGGGCCGCAGGGATAATTTCTATCGGT  
CTCAACCCGCCAGCGAAGGTGTCACCCCGGATTGGAGGATCATCGACCAAGAGAAA  
CCCTCCTCCCAGTGGAGGGAGGAAAATGGCTCCACCATCAGAAGGGTAAGTTATCA  
GCCCCAAGGCCGAAGAACATTCCGGAGTTTCGGGTCTCAAGGAAAGAGGATCACT  
CCCCTGTTTCGGTTGAAAAGAGAAGAAGTTTCATGCAGCCGAAGAGATGATTACTCTC  
CTGCTTGGCCGAAAAAGGAGGGAGTCTCCCGCAGCAGAAGAGATGACGACTCTCCT  
GTTCAAGCCGAGAAAGGAGGAAGTCTCCCGCAGCAGGAGAGATGACGACTCTCCTGT  
TCGGTCAAGAAGGGAGGAAGTCTCCCGCAGCAGGAGAGATGACGACTCTCCTGTTT  
GGTCAAGAAGGGAGGAAGTCTCCCGCAGCAGGAGAGATGACGACTCTCCTGTTTCGGT  
TCAAGAAAGGAGGAAGTCTCCCGCAGCAGGAGAGATGACGACTCTCCTGTTTCGGT  
AAGAAGGGAGGAAGTCTCCCGCAGCAGGAGAGATGACTACTCTCCTGTTTCGGTCAA  
GAAGGGAGGAACCTCTCCCGCAGCAGGAGAGATGACGACTCCCCTGTCCGGTCGAGG  
AGGGAGGAGCTCTCCCGTAACAGGAGAGATGAGGAGGGATGA

> Loki-Pfl consensus sequence *Mscramm* protein

MRARVNLFTSILQLRQAIIVATGDCPLAQQVRMSDHSDELTEEAQTESIDTVITDVSAL  
IRLPPADRVFLEEYEVGTCEKTKLKLKLDYVDQPTGKPELTKPDVLLGQIVLLQRRFHLQL  
TELQRHSQTQQEAI RRLRQEIRDAHDAYS DLQAECVLLKQLKIAKQQGDAGDGDQTN  
RVSTEA AEF TTKTGDSDDERAAGIISYRSQPASEGVTPDWRIIDQEKPSQWREENGSTIR  
RVSYQPPRPKNIPFRVSRKEDHSPVRLKREEVSCSRRDDYSPA WPKKEGVSRSRRDD  
SPVQPRKEEVSRSRRDDSPVRSRREEVSRSRRDDSPVRSRREEVSRSRRDDSPARSR  
KEEVSRSRRDDSPVRSRREEVSRSRRDDYSPVRSRREELSRSRRDDSPVRSRREELSR  
NRRDEEG\*

>Loki-Pfl consensus sequence *gag-pol* gene

ATGATTACTCTCCTGCTTGGCCGAAAAAGGAGGGAGTCTCCCGCAGCAGAAGAGAT  
GACGACTCTCCTGTTTCAAGCCGAGAAAGGAGGAAGTCTCCCGCAGCAGGAGAGATGA  
CGACTCTCCTGTTTCGGTCAAGAAGGGAGGAAGTCTCCCGCAGCAGGAGAGATGACG  
ACTCTCCTGTTTCGGTCAAGAAGGGAGGAAGTCTCCCGCAGCAGGAGAGATGACGAC  
TCTCCTGCTCGGTCAAGAAAGGAGGAAGTCTCCCGCAGCAGGAGAGATGACGACTC  
TCCTGTTTCGGTCAAGAAGGGAGGAAGTCTCCCGCAGCAGGAGAGATGACTACTCTC  
CTGTTTCGGTCAAGAAGGGAGGAACCTCTCCCGCAGCAGGAGAGATGACGACTCCCCT

GTCCGGTCGAGGAGGGAGGAGCTCTCCCGTAACAGGAGAGATGAGGAGGGATGATT  
ACTCCCCTGCTCGGCCAGGAAGGGACCGCCACTCGGTCAACGGGGAGGAGCCGA  
CAAGGAGGTGACTACCGCACCTCAGACGACTCTGATGAAAGTCTGAGGGAGAGGTC  
CCGTTCTCTGCCTGGAAGGATCTGAGTCAGCCTCAACGGAAAACCCACCGTCAACA  
CCGGAGAGGGAGAGGCAGCGGTACTTCCAGTGACTCTGACGCCTCACGCCACTCCC  
CAGCGCAGGGCCTGCGCATGCGCCAGATTGACTCCTTCGCAAGGGAGCTAGAGCGT  
TTCGACCCCAACAGTCGAGAACTAATGTCGACGACTATCTCCGCGATGTAGAACG  
GGTCCTGTCAGACCTCCCAATGCAACGTCGCGGAGAAGCGCAAATACTCTGGA  
AGACCACGGCAAGGAGCGCCATGTCTTTATGGACGAACTCCCGCCCTCGACCTTAA  
ACAGTTACACAAAGCTCTGCCAAGCTTTACGAGAAGAGTTCGCCCTGTACACCGACC  
CAGCTGCGGCCATCCAGGGAGCATATGCCATTGTGCATAAGAGGAATGAGGCCCCG  
AGGGAATATTATAGGCGTCTAAGGACCGTTTACTTCCAGGGCCCGCCGCTCCCCAGGT  
CTAGAGGAAGACCCCGCTTTCCAATCCCTGTTTCGTACACAATCTCCACGATGCTGTA  
CGGTACGATGTGCAGATGCATTGTAGAACACAAGAGCTCACCATGAAAGAGATTAG  
GATGTTTCGCACAAAGGGTGTGGGAGGCTCGAACACGACCGATCAGGAAAGGTGAGG  
AGGAGCCGAGGGTACTACACATCCAGACCTCAGAGAACGCAGATCTAGCCCTCGAA  
GGGAACGAAGTTCCCCAGGGAAACAGGGGACTCCAGACCACCAAACCAGGAACAAC  
GATCCTACCACACAGGCAGGCAAAATCGACAAAACAATAACAGAGGGAAGAAGAA  
GCCCTATGGTGGAAGAAAACCCGGTAAGTATGAGGGAGGACCTCAAAGCCAGGAA  
AAGGATGACGGTCGTAATGCCTCCCCAGCACAGCAGCAGGCCCCCTCCGAAGGGACC  
TGAGACCACCTCCCAACCCGCGGACTAAGCCAAGCGCCCGTTTCACTCACCGCCAA  
GGTGTCTTCATAGGGTGGGGAAACACGCCAGACAGTCTCCAGAGTCTGTCACTCC  
TCTTCTCCTGCGGCTTCCAGGGTTTTCTTGGGCGACCTGGTCCATCGGGGCAACGC  
GCGCCGCATCCACACGTCAGTGATGCTTGGTAGCTGTGTGAGTATTCTTGCATTGTTG  
GACTCTGGCTCTGAAATAAGCCTGATGAGTTCGACACTTTCTCAAAGGTGGCTAGA  
GCAATGCACCTCATTGGCAAACCCCTTCAAATCGAGCCCTGCGACGTTAGCATCACC  
AGCTACACGCAGGACAGGTCACCCATCACGAAGCGTGCTTGGGTTGACATAACTTTC  
AAAGAAATGTCTCTTGTACACCCCATTTACATCTGCCTTCTTGACACCGAACCTCTGC  
TCATTGGCCAAGATCTCCTAGATCGACTGGCACCGCTCATCGACTGCCATCAGGGTC  
ATATCTGGGCTCAGGTGAAAATCTCCTTCCCCTCTGGGGAAGGAGAGTTCGAACCCT  
CTCCGCGGTGATGGTCTTTCTTTGTTTCTTAGAAAACACCAACCAGGAGCTGTATA  
GTCCCAGCGTGGTCAGGAAAGTCCAGCTCAACGGTCTTCTCATATCGGACGCGCGTC  
TGGCGCTCTGGTCTGAGAGAACCGCGGTCAGCCAGGACCTGTACCACGAACTTCAA  
AAGCGAGACCCACCCCAAGTTTTCTCCAACGTAGCCACCGTGTCTGTGCGGCAACA  
CACCCACAAACCCCTCCTCAAGGCCGTCGGTGTATGTGCCCTCTTGGTACTGATTGGG  
AAAAAAAGGGTGTTCATTTTGCCAGTGTGGTACCCGACCTACATGCCCCGTTCTTC  
ATGGGGGCGGACCTTCTGGTCAGGCTCGGGGTCCAGTTAGACACGGTCAATCAGGTT  
TTGTGGTCACGAGCCAATGCAGAAGCTCATTCCCTAACCAACCGAACCAAGCAAAT  
GACTTCGGGGCAGACCATTCCCAAGCCTGCCGGGTAATGAGTGAAACTGTGGTGA  
CCATCCCAGCACGACTGCCGGTGTCCCATCCGTCTTGCAATCTGTCAAGGCCAGA  
AGATACTGGCCCTCGGGCTTTCTTCCAGCCGTTGCACGGTTTTTGGGAACTGAACTT  
GGCCGTCTGTGGCACGCCCTGCTTGAATTGGACAATCGTTCAGCCTACCTCCTTGT  
CAGAATCTTACGCAAGCTCCGATCCAGGTTGCAGCACGGCAACTCCTGGGGATGCT  
GATCGACCACTCTTTTCATGATTTTGAACCTGACCAATCCAGTCATAGGGGAGATGCC  
CCCATCTTTGGACACCAATCTTGACGGTGTCTCTTCACTTACCCAACTAAAATGATC  
ACCGTTGCCAGTGACGAAACGCTACAGAACGAAACAATCTGCAGCACAAGTTTAGG

CAAAAGAGGGGACATGGTGGTGTATGCCCTGGTGGCACAACCAGGAGGGTCCCCAG  
ATACTGGTGACAAAAGACAGGAGTTACCAGAGGAACCGTACCCTGGGTTCGAGTCT  
GAGATTGAGCAGCAGCTGGGGAAAGCAGATGCCCTGACAACAGAACATCAGCGGA  
ACGAGCTCCGAAACTATTTTCATGAGTTCCAGCCAATCTTCTCAAAGACTCCCAGG  
ATTGCGGAGTCACGGACATCCACACTGTTTCGCATTTCCACCGATCCAGGCGCAGCAC  
CCACCTTTGTACGCCAGTACAAAATCCCCTGGCCGCCTATGAATCGATCCAAGAGA  
TCCTCGACAAGCTGTTGGAAAAACAGATTGTCAGGGGAATGCAACTCCACATACAATT  
CACCCATTTGGCCGGTGTAAAACCGACCGGGAAATGGCGCCTCACTATTGACTATC  
GGCCATTAACAACAACAGGTCCCCTCTCCCCTGGCCCATGATCCACTTGGATCAGG  
AACTGGCCAAGGTCAAAGAGGCCCGGTTCTTTTCAACGGTGGACGTGGCAAACGGG  
TTCTGGACCATGAGGGTCGACCCAGTGGACCAGTACAAGCTGGCTTTCTCTTTCTGC  
AATCGCCAGTACACCTGGAACCGCTGCCCGTTCGGATATTCAAACCTCCCAGCTGAG  
TTCAACATCTTCTCCACAAGGCAATGAGCGATGCCTCAGCCCGTGGAAACCTCATC  
TACGTGGATGATATCCTCATGAGGAGTCGGTCTTCGATGAACACCTGGCCGAGATC  
CGTCACATTCTGGGCCAGCTTGCGGCCGCAGGAGCAAACTGGCAATTACCAAGGG  
CCAGTGGTGCCGCACCAAGGTAGAGTACGTGGGGCTGACCGTGGGTGCCAATGGTA  
TTGAGCCTAAAGCAGAAAGGATGCGAGCTATCCAAGACATCATGGCCCCTGTGAAC  
GTTTCAAACCTCCGGAGCTTTCTGGGAGTCTGTAACCTATCCCAGACAGTTCATCGCA  
GACTACGCAGAAATAGCCAGACCCCTCACAGAACTCCTCGGCAAAGACAAACCGTT  
CCTGTGGGGTGAACCCCAAGAGCAGGCCTTCCGCCAAATGAAGGCAGAACTCTGCT  
CCGCTCCCTGTCTGGCCTACCCGGATAAGGACAAGGAGTTCAACCTTGAGGCGAGTT  
TCTCCACCCAGTGCCTTAGTGCCGCCTTGGCCCAGAAATATGATGCAGACAAACGGG  
TCGTGGCTTACGCCAGCCGACCCCTCAGCAGCGTGGAGATGAAGTTTTCCGACTGCG  
AGAAAGCCCTTCTGGCCACAGTGTGGGCGGTGGAACACTTCCGCAGCTACGTAGGA  
GGGCAAAGGTGCTCATTGAGACCTGCCACCAACCGGTCACCTTCTGAACAGCCA  
GCGGCTTCGGGAAGGGGCGGGTGTCCAACAGTCGCATCGCCTCCTGGATGATGGCGTT  
GCAAGGCTATGACATCGAGGTAAAGTATGCTCAGAACCACAAGATGGCACTAGGTC  
AAGGCCTGGCTGAGTGTCAACACTGCGACTGTGATGAACAGCCAAGCCTCCAGTCC  
TACTGGTCACCACCCCATCACTCCCCTCCAACCATCATTATTATGATGAAAATGTTT  
GTCAAGGCCTCCGTGAAGTCTATGTGGATGGCTCATTCCACCACGAAAGTCAGACTC  
AAGCTGGTGTGGGCATTTACTGGGTCAAGTACCGCAGTGAGGAACCCAGTCACTAC  
CAACTTGGTCCCAAGACCAGCCAGTATGCGGAAATCGCTGCAGGGTTCATTGCGCTT  
CAACAAGCGGCCAGACAAAAGATCAGTCAGCTGGTGTGATCTGCTCTGACTCCAATA  
TGCCCGCTACAGTTTCATTGCACACTTTCTGCGTGGAAAGAGAAAGGTATGCTGAA  
TGCCCGCAACAAAGAGATCAAGCACGCAAAACTTTTCTCGCATGCGACCGACTGG  
TCTCACAGCAAGGAATGACCGTGTACTGGAGAAAGGTCAAGGGCCATTCCCAAATC  
TCTGGTGGGGATAAGGAAGGAAACGATGAAGCTGACCGCCTGGCCAAACTGGGCGC  
AAGTCAAGGTACGCCCTGGCAGTTTCAGGAGGAGTGGCTTCCAGATTCCCAAACCTCA  
CGCGGTGAATGCAATCACTCGCCGTCAGGCCAGAGAGAGACGAGAAAATTCTCAAG  
CCGGTGCACAAACCTAAATCTGTGTCGCCAGCCTGAGGACACAGACCTAATCACC  
ATGCAGGAGAGGGACCCAGCTATCTGGGCGGTTCCGGCAGCTGCTAGCAAACCCCCC  
ACCGCAAACACCACTCAACCCTCACCAGGTGAGCCAGAGGAACTATANGCCCTCC  
GCCTCAACCCGCAGTCTTTCAGGATTGAGAAGGGTCTGTTGGTCTACTCTGATGGTG  
ATCAGGGACCGACAAGGTGGGTGCTCCCCACTCACCAAGGGGGTTGATGTTAGCA  
CACGCTCACGACTCGCCAGTGGGGGGCCATCGAGGCCCCCAACCCNTGGAAACCT  
CCGGCAAGTTGCCTATTGGCCGTCAACGAACCGCGATGTCAAAGCTTACGTTAGAGG



ATGTCTGGTCTGCTGCCAGTTCAGCCGTCCCAGCCATTGGGTAGAGCCCCGCTCCA  
GAAAAGGGGGGTCACGTTCCCCTGGTCCCACCTCCAAGTGGACTGGGTGGGCCCCG  
TACCAGATCGTCAAGAGGAAATAAATACCTCCTCACGGTCACATGCGCTTTTACAA  
AATGGGTGGAATGCCTTCCAGCACCCAACGACACGGCAACGACCACAGCAGTCTTG  
CTACTAAACCATGTTTTTCAGTCGTTGGGGACTACCCCTTTCGGTTGATTCGGATCGAG  
GCACCCATTTACGTCCGGGGTCACTGACTGCAATGTATGACATTCTTGGAGTAAAAA  
CAAGATTCCACATCCCATATCACCCCAATCATCAGGCCAAGTGGAAACGCGCTAACC  
GGACCATTGTCAACATGCTCAAGAAGTATGTCAATGGTAGCGCTAGGGATTGGGAC  
GTGAAACTTCCCCTGGTACTGATGGCCATCAGGTCCACTCCACACCGCACCCACGGGG  
ATCACTCCATTCGAGATGATGACCGGAAGAGAGATGACGTTGCCACTGCATCTCTTG  
TACCACCTCAAGATGTCAAGTGTCTCAACGGCATACTGCCACTCAATACGTCTCG  
AAATTGCGCGAACATCTTCGGTCCACATTTGCCTGGGCCCAAGAAAACCTGGAGAC  
AAGGGCAAAGGGGGCCAAGGCGTACTACGACCGAAAGACAACCTCCCCGCGAGTAT  
GAAATAGGTGACAAAGTCTTCTATTTTCAGGTTTACCAAACCGGTGGGAATCTCTCGA  
AAGTTCCTACCAAGCTGGTCAGGCCAGTTGAGATTGTGGGAAAACCTTCCCCGGTG  
GCGTACCGGATCAGATTGGCTAAGCCGAAACAGCCACCGACCTACAAATGGGTCCA  
TTCAAACCAAATCAAGCCATACGAGGCGCCACCCCTCCCCACAGAAGGGGAAAAC  
CCCCATCAGCAGAAAGGGGGAACAGCCCAACACAGACATAG

> Loki-Pfl consensus sequence Gag-Pol polyprotein

MITLLLGRKRRESPAAEEMTTLLFSRERRKSPAAGEMTTLLFGQEGRKSPAAGEMTTLL  
FGQEGRKSPAAGEMTTLLGQERRKSPAAGEMTTLLFGQEGRKSPAAGEMTTLLFGQE  
GRNSPAAGEMTTPLSGRGGRRSSPVTGEMRRDDYSPARPGRDRHSVTTGRSRQGGDYRT  
SDDSDSLRERSRSSAWKDLSPQRKTHRQHRRGRSGTSSSDASRHSPAQGLRMRQI  
DSFARELERFDPNSRETNVDDYLRDVERVLSLDPNATSREKRKLLWKTTARSAHVFM  
ELPPSTLNSYTKLCQALREEFALYTDPAAAIQGAYAIVHKRNEAPREYYRRLRTVYFQ  
RRSPGLEEDPAFQSLFVHNLHDAVRYDVQMHCRTQELTMKEIRMFAQRVWEARTPIR  
KGEEPRVLHIQTSNADLALEGNEVPQGTGDSRPPNQEQRSYHTGRQNRQNNYRGKK  
KPYGGRKPGKYEGGPQSQEKDDGRNASPAQQQAPPKGPETTSQPARLSQAPVSLTAKV  
FFIGWGNTPDPLPESVTPPLPPAASRVFLGDLVHRGNARRIHTSVMLGSCVLSILALLDSGSE  
ISLMSSDTFSKVARAMHLIGKPLQIEPCDVSITSYTQDRSPITKRAWVDITFKEMSLVHPI  
YICLLDTEPLLIQDLDRLAPLIDCHQGHIWAQVKISFPSGEGEFEPSRWSF LCSLENT  
NQELYSVSVVRKVQLNGLLISDARLALWSERTAVSQDLYHELQKRDPPPVSQRSRHLV  
SATHPQTLLKAVGVCALLVLIGKKRVFHFASVVPDLHAPFFMGADLLVRLGVQLDVTN  
QVLWSRANAEAHSLTTEPQQMTSGQTIPQACRVMSETVVTIPARTAGVPIRLAICQGQKI  
PGPRAFFQPLHGFWELNLA VCGTPLLELDNRSA YLLVQNLTAQAPIQVAARQLLGM LIDH  
SFHDFELTIPVIGEMPPSLDTNLDGVLFITYPTKMITVASDETLQNETICSTSLGKRGMVV  
YALVAQPGGSPDTGDKRQELPEEPYPGFESEIEQQLGKADALTTEHQRNELRKL FHEFQP  
IFSKDSQDCGVTDIHTVRIPTDPGAAPT FVRQYKIPLAAYESIQEILDKLEKQIVRECNST  
YNSPIWPVLKPTGKWRLTIDYRPLNKQVPLSRWPMIHLQELAKVKEARFFSTVDVAN  
GFWTMRVDPVDQYKLA FFCNRQYTNWRC PFGYSNSPAEFNIFLHKAMSDASARGNLI  
YVDDILMRSRFD EHLAEIRHILGQLAAAGAKLAITKGQWCRTKVEYVGLTVGANGIEP  
KAERMRAIQDIMAPVNVSKLRSFLGVCNYSRQFIADYAEIARPLTELLGKDKPFLWGEP  
QEQA FRQMKAE LCSAPCLAY PDKDKEFNLEASFSTQCLSAALAQKYDADKR VVA YASR  
PLSSVEMKFS DCEKALLATVWAVEHFRSYVGGQKVL IETCHQPVTFLNSQRLREGRVSN  
SRIASWMMALQGYDIEVKYAQN HKMALGQGLAECQHCDCEQPSLQSLLVTTPSLPSN  
HHYYDENVCQGLREVYVDG SFHHESQTQAGVGIYWVKYRSEEPSHYQLGPKTSQYAEI

AAGFIALQQAARQKISQLVICSDSNYARYSFIAHFPAWKEKGMLNARNKEIKHAKLFLA  
CDRLVSQQGMTVYWRKVKGHSQISGGDKEGNDEADRLAKLGASQGTPWQFQEEWLP  
DSQTHAVNAITRRQARERRENSQAGAQTLNLCRQPEDTDLITMQERDPAIWAVRQLLA  
NPPPQNTTQPSPGPEELXALRLNPQSFRIEKGLLVYSDGDQGPTRWVVPTHHRGLMLA  
HAHDSVPGGHRGPQPXETLRQVAYWPSTNRDVKAYVRGCLVCCQFQPSQPLGRAPLQ  
KRGVTFPWSHLQVDWVGPVPRSSRGNKYLLTVTCAFTKWVECLPAPNDTATTTAVLLL  
NHVFSRWGLPLSVSDSRGTHFTSGVMTAMYDILGVKTRFHIPYHPQSSGQVERANRTIV  
NMLKKYVNGSARDWDVKLPLVLMAIRSTPHRTTGITPFEMMTGREMTLPLHLLYHPQD  
VSVSTAYTATQYVSKLREHLRSTFAWAQENLETRAKGAKAYYDRKTTPREYEIGDKVF  
YFRFTKPVGISRKFLPSWSGPVEIVGKLSPVAYRIRLAKPKQPPTYKWWHSNQIKPYEAPP  
LPTEGENSPSAERGNSTPTQT\*

> Loki-Pfl consensus sequence *env* gene

CTGTTCTGTTGCAGGATGGAGCTACTGTGGGTCCTTGGCAATCTCCTCGGGCTATCA  
ACCCCTCTCCCAACTGAGGTGGTTGAATCAGGCCCGCCACCGGGATCGTCCTCCAG  
GGGACGCCCGGACTGCTAATCACCCGGTGTGGTCTCTTCACCCAGAGAGTCTATGTA  
CGACTAGACCCCTGGGATGTCTACCGCAAACACATCGTTCTACCACCCCAATTGAGC  
GAGGGACGGTTAAGTGGGGTCCAGACCCACGACATAGTAGAACGAGCTAAACAGAC  
CACTGCCACATTCTGGAACAATTGCAAAAGTTCATAGTCACAGAAGAAGACCTCA  
GTGGCCAGAGACGACCTAAACGTTTCTTAGGGCGGCCTGCTCGTCGCAGCCTCAGCCA  
TCGGGTCATTATTTTCTATTGGCCTGTCCGCGGCCAACTCAATTAGCCTCGGCGCGCT  
CCAGAGACACATGGGGGAACTCGACCAAGAAATGCCAGAGATCCAACAGAGACTC  
CTCCTCCAACAAGAACAGTTACAAAACCTAGGAAAACTTTCCAGGGGACCATAGT  
TACTGTAAATTTGCACTCTGCCCTCCTGAATAACACCATGCATGCCTTAGAGAATTT  
GTCCAAAGTGGTCCAAGAAGACCTAACGTACGTCCGCATAGTCAGAGACCTAATGC  
AGGACCTTGTCAGGGAGGTTAGCTCCTCAGTCAACAGCCTGAGCGCGGGAAAAATT  
CCAGCTTACCTAATCTCATTAGGACTCGTCGAACAGATCTTGAAATCCGCCACTAGT  
ACGGTAGTACACCCTTACAGGTACACCTGGCGTATAGCCTTGGCAGTGCAATCCCC  
ATCTCAGTAGACTCTAAGAACTTAGAGATAGGCTTCATCCTCAATCTTCCGATTCTA  
GAGAGACAAAACATATAACCGACTAAAGTCTGTACTGAACGTGGGCTTCTGGAAAGG  
TAACACACACGTACACCTTAAGACCCACCCACAATTGCTTTCATGAGGACAACCC  
CTCACTCTACCTCATTCCCTAACCTAACATGTGCACTAAAACAAAAGACATACACTG  
GGTCTGCCCGAGCAACCCATTCGTTAGAGATGTCACTAACTACCTCTGCGGCCTGAG  
GGCCGACACACCTGAACAAAATGTCAGGGCAGTATGTCCATAAGGGACGAGGGAA  
CAGAAACGAGGGTGGAAACGGGCGGGTAACCGATGGCTCGTCAGTACACCCGTCACG  
GAAGCGTTAATGTCCTACGACCGTCATGACACAGCCACTAAGTTAACTTTACCTAAC  
CAAACGGTATTTTTAACAGTTCCCAAGGAGCTACCATTTCATATCGATGACATTGTC  
CTCCATCATCTCGATCCCGACAGACACGATGCCGAGATTGAGATCACGGACGCATTT  
CGAGGCCACGACCTCACTATTGAATACCCCCTCCAACAGCAACTTCTGGCTGAGGGG  
ACTAACTGGTTCAGTTCAGCCTCAAACCTACGGGGCTTACCACCACGTTTTCCAAC  
CATGTAGGGAGTTCGGCGTCTTACCAAGACCACCCTGTTAGCATGGTTGCCTTGGGC  
CTCCTTCTTAGTGGCTGGATCATCACCGCGATAGTCGCACATTTTCATGTACAGACAC  
ATACAGAATTTGCAAACCTAACTTGACTCGATTCTGTTTCGTATCACCACGTTTACA  
CAGCAGACCACATCATCCACTAG

> Loki-Pfl consensus sequence Env protein

LFCCRMELLWVLGNLLGLSTPLPTEVVESGPPTGIVLQGTPGLLITRCGLFTQRVYVRLD  
PWDVYRKHIVLPPQLSEGRLSGVQTHDIVERAKQTTAHILEQLQKFIVTEEDLSGQRRPK

RFLGGLLVAASAIGSLFSIGLSAANSISLGALQRHMGELDQEMPEIQRLLLQQEQLQNL  
GKTFQGTIVTVNLHSALLNNTMHALENLSKVQEDLTYVRIVRDLMQDLVREVSSSVN  
SLSAGKIPAYLISLGLVEQILKSATSTVVHPSQVHLAYSLSAIPISVDSKNLEIGFILNLPIL  
ERQNIYRLKSVLNVGFVKGNTHVHLKTPPTIAFHEDNPSLYLIPNLNMCTKTKDIHWVC  
PSNPFVRDVTNYLCGLRADTPEQKCQGSMSIRDEGTETRVERAGNRWL VSTPVTEALM  
SYDRHDTATKLTLPNQTVFLTPVQGATIHIDDIVLHHLDPDRHDAEIEITDAFRGHDLTIE  
YPLQQQLLAEGTKLVQFSLKPTGLTTTFSNHVGSSASYQDHPVSMVALGLLLSGWIITAI  
VAHFMYRHIQNLQTKLDSILFVSPRFTQQTSSH\*

>Loki-Pyo consensus sequence

GAAAATTTTAAATCGATTATAATTGATTGTTAAATAAAGAAATAATTTTTTTTCTTTG  
CAAATTTTACTTTTAAAATCCCCTTTGCACCTTTGCCAAGCAGGTAATAGGTGCTC  
TGTGTAGACTGTAGTTGGTTGCTGACTGCGTCTCAATCGTTAGTAGCCTGGATTGGA  
GATCCACGACAAGTTATTTTATTGAGGAGACTAATTGTTACCTACTAGGTCTAT  
AGGATTGAGCCGCCGAGCTATCCTACCTAAGAGTACTCGATAAACACAGGGTGAAG  
CTCGCCCGTGTCTTCTTGTGTAGTGTAAACGTACGTGTTTTACCCGCTTGCATCCAA  
GCGTGTGAGTAATCCCACAGGTGTCTTGTAGCACTCAGAAGATGAGTAGCGCGGA  
CAACTTCCCTTCAGGGTCAGAAGACCTGCCCCACTTAGTCGCTGATCTGATAAATTT  
ATCTATTGATGATGTGAGTGAGGTAAGTGCATATGATGTCAGTACCTGCGATAAGAA  
GATTGAGGAACAGATTGGGTACATCAATAACCCTTCTGATCCCCAACGCTCAATATC  
CAAATTTCTGGGTCACCTGACCCTCCTGTATGAACAGAGATCACGGCAGAAAGCCA  
GAGAACACTCCGAAGCGATCAGTGCCGTGCGAACAGCATGTCAGACAGAGCTAGAT  
GAAAAGTCCTATTTGCAATCGCAAATTCAGATTACAACAGGAAATGGATAAGAC  
CCGTGAAGAATGGGACCAGACACGGCAGGAGTGTGAAGATCTGCGTGAACAGGTCA  
GACATCAGAGTGAAAGAGAGGTGAGAGACACAGGAAACAGTCTGTGGACACCTGG  
ACTGGAAACAGGGTCAAGAACTGCCGTCTCACCCGGTGAAGCCAGTGGAATAGAGC  
TACTGGAAGAGCGACGGCGAGCACCCGCCACGCGAACCTCCGATTGAGGAAGATTGG  
CGCAGGCATTTTGTGACACTTATCAGAGGCCCTTCCAGCCAATACAAGAGTCAGA  
GAGGAGCCAGCTGAAACCCCAAGGAGTGCAGTACTGTTGACTACCAGGCAACACC  
AAACGCCTGTCCAGTGGACCCTGGTAATCCATTACAGACCGGAAAGAGCCCCTTACC  
AAGAAACCGACCTGCTCCATACCAGGATGATGGAAGAGCTCCGTCCTATACGCCTG  
AAGGAGATTTCTATCAGAGAGGAACCAGGCTAACATCGAACATCGGCCTACCACT  
CAAGCAGATGCACGCTCTGGTCCCCGGTTGCGTCCTGAATGGCACTCCAGCTCCGGT  
GCAGGGCGAGCAGATGGTTACCGCCACGATCAGTACTCAGACGACTCTGACAGCTC  
AATAGCACCTGTGAAAGAAGGAATCCGCACCCGACAGCTCGAGTCCCTGTCCAAAG  
ATATTGATCGCTACGATCCCGATGTTTCGAGGGTCCAACGTGGACGATTACCTTCGGG  
AGGTCGAACGGTGCCTCATGGATTTAGCCAACCCCTCACCCAGAGAAAAGTTGAAG  
CTGATCTGGAAGACAACAGCCCAGGTGTCCACGCGTTCATGGAAACGCTGTCCCCT  
GACACTAGAGATCGGTATTCCACCCTCTGTCAGGCCCTGCGAGAAGAGTACTCACTC  
TTCACCGACCAGGCCTCTGCAACTCTCGGTGCCTTTGCCGTTCATGCAGAGAAAAGAA  
GAATCTCCAGAGAATATTACAGACGTCTGAGAACGGCGTACTTCCAAGGGCGTAA  
TGCCCCTGGGTTGGAAGAAGAACTGCTTTCAAATCCTTGTTCCTGCACAACCTCCA  
TGATAGTGTGCGGTACGATGTCACCATGCACTGCAGAGCTGGTGATCTCACGATGCG  
AGAGATGAGAAAGTACTCTCAACTAGCCTGGGAGACGCGAACACGCCAGGTAAAG  
CACCTGAACAGGACGCGAGGGTCTGGGAATCCAAGCTCAACCAATGTGGATCTG  
GCGCTGGAGGGTAACGAGATACCCCTGGCCAAAACACATATCAGAAGGGGAGAACC  
GGGAACGCCGACCAGTCCAGCAGGATGCTAGGAGAAACCGAGAACGGGAGGGATC

AAACCAGCCCCGCAACCAGAGGTCTCAATATCCAACCTAACTCTCAACAGAGAGGGA  
GGGACTGGGCTGAGCGAGATCCACACCAACGCCACGAGAAGAAGTTCAGTGATAAA  
TATCCCAAACAAGGGAGACCACAAGAACAAGAAAAGAGACAGGAACATTGGAAGC  
AACAGGAACATGGTAGAAGACAGGAACCTTGGAAATCAACGGGAACGTCGGAATCC  
AGAGGAACATGGGAGAAGACAAGAACCATGGAATCAACAGGAGCCACAAATAAAT  
CCACGAATGGAAGATTTTATACGCCGATGTGTGGCGGAGGTCGTAAGGGACCGAGA  
TGTCCCTACCCGCACCCCTGCACCACCTGGCGATCAGAAAAATCCAGACAAGGGTC  
CCCCATCAACGTGACTAGGACAGGTGTCAACAATCCCCACCTCCAGAGTGTACTTTG  
TGGGTTGGGGAAACTCAAGCCTCATCCGAATAAACCAGACGCTTTCACCACAGAC  
ACTGCTCCCTTCCTAACTTTCTTGGGCGACCTCGTCCGGAAAGGCAACGCACAACGC  
ATCTACACTTCAGTAGTAATAGGAGGCTGCTTCAGCTCCCTGGGCTACTGGATTCA  
GGCTCGGAAATCAGCCTGATGTGCGCCACCACTTTCTCCCAAGTTGAAACAACCATG  
TTATCTCTCGGAAAACCCCTGCAGGTTGAAACCTGCAACATTAATATCACCAGCTAC  
ACTCAGGACCAGTCATCCATCACAAGACGTGCATGGATTGAGATCACCTTCCAAGA  
GATGAGTCTGGCACATCCCTTCTATATCTGTTCCATCGATAACAGAACCACTACTCATC  
GGTCAGGACCTGCTGGACCGACTCGCTCCACTCATCGACTGTGCGCAAGGACGCATT  
TGGGCTCAAGTTGAAAACCCCAAACCTCTCGAGCCTAATGTCAATCTTCCTCCCCAA  
GTTGATGCCATCCAGACGCCCAGTAGAATCTCACCGATGCATATGCCTCTTCAGAG  
ACCGACCCCAGTTCGGACCCCCTCTGCACCACGGCAAGTGGGCTGTGCCACGACCT  
GACTCAGAGACCACCTTCAAATCCCATGCTTCCTTCCTATGTTCACTGAACAATGAG  
AACCCGTCATTGTACGTTCCCCGCATTACAGAAGATGTTTTCTAAATGGCGTTCGA  
ATCCCAAACACCCTAGTAGCCCTGTGGTCTGAAAAATCCGCAATCAGTACGGACAT  
ATACACTGATCTATGCAAACCTAGAACTTCCACCTATCTTTGTGCAACGCCGACACCG  
TATACTCTCAGCAGAAATACCACAACTCCTATCAAAGCGACTGGAGTGTGCGCTAT  
CTCCGTGCGGATTGGAAAACGACAGATCTGGCACTTTGTGAGTGTGATTCCCCAACT  
TCACTCATCATTGATGGTGGGGGCAGATCTCCTCATCAGACTCGGAACACAGGTGGA  
TACCATAAACCAAGTGTGTTGTGGTCCCAGGTCAGGGCAGAAAGACACTCCCTGTCTGC  
TGACCCAGACCAGATGCTCTCCGGACAAACGATTCCCCAGGCATGCCAGGTCGCCA  
GTGAGGTTGACATGGTCAATTCCTCCACGAACTGCTGGGGCCCCATCCGACTTGAAAT  
CCTCAAAGGACAAAGGATCCCGGGCCCTCAGGCTTTCTTCCAGCCTTCGCCCTCCTT  
CCGGGAACTCAACCTGGAAGTCTGTGGCACACCTCTGCTGGAGTTGCAGCAGATCC  
ACTTATGTACTTGTGAAAAATCCCACACACTGCCCCGTTCCATTGAAGGCACACCAA  
GCGATAGGAATGTTGATCGACAGCTCATTCCACGATTTTCGAACTGACTATACCTGTC  
ATTGGGGAGCTTCCCCCTTCTCTGATCAAGGATGGTGTGATGTGGATCAAGTCTCTCAT  
ACATTTCCAACCAGCATGATCACTGTTATGCGTCATGAGTCGCTGCAAGACGAAGCC  
ATTTGTGGAGCCTCTCTGACGACAGAAGGCGACATGATGGTGTATGCTCTGGCAGCT  
CAACCAGGACAGGACGTCTCAGAGGATGCTCAACCAAACGAACTGTATCCAGGGTT  
TGAGGCTGAGATCAAGCAACAACCTGGAGAATGCAGATGCCTTGACATCAGACACAC  
AGAGAGAAGTGCTTCGGGATCTGTTCCCTTGATTTCCAGTCAATCTTCTCAAAGATT  
CTACTGACTGCGGGGTCACAAACCTCCACACTGTGCGCATCCCCACTGATCCAAATG  
CCCTACCAACCTTCGTACGTCAGTACAAAATCCCATTGGCAGCCTACGAGTCCATCC  
AAGACATCCTTGACACCCTGCTAGAGAAACGAATAATCAGGGAATGCAACTCAACA  
TACAATTCCCCATTTGGCCGGTGTAAAACCAACTGGAAAATGGCGTCTCACAATT  
GATTATCGTCCCCTGAACAAACAAGTTCCCCTGTCCCCTGGCCGATGATTCACCTG  
GATCAAGAACTGGCCAAGGTCAAGGGAGCCACGTTCTTCTCCACAGTAGACGTTGC  
AAACGGATTTTGGACTATGAAGGTGGATCAAGCCGACCAGTACAAACTGGCTTTCTC

TTTCGGAGGCAGCCAATACACCTGGAACCGCTGTCCGTTTGGATATTCAAACCTCCCC  
ATCGGAGTTCAACATCTTTCTCCACAAAGCCATGAGTGACGCCGCAACCCGGGGTA  
ACCTCATTTACGTGGATGACATCCTCATGAGGAGCCAAACCTTCGAGGACCACATAA  
CAGAGATCCGACATGTACTCACTCAACTGTCCAACGCAGGAGCCAAGCTGGCTCTTA  
CCAAAGGCCAGTGGTGTCTCGCACCAAGGTA AAAATATGTGGGTCTGACAGTCGGTGCT  
GATGGCATTGAACCCCAAGCAGGGCGGATTCGAGCCATTCAGGACATCAAAGCTCC  
GACACGCCTAACAGAACTTAGGAGTTTCCTCGGGGTCTGTA ACTACTCCCGCCAGTT  
CATCGAAGACTATGCAGAGATAGCCAGACCTCTCAACGAACTCCTTCACAAAGACA  
AGCCCTTCGAGTGGGAAGAACCCCAAGAACAATCCTTCCGTCAGATGAAAGAAAAA  
CTCTGCTCGGCTTCCTGTCTTGCCACCCAGACAAAGACAAAGAGTTCCACCTCGAA  
GCAAGCTTCTCATCCCACTGTCTCAGTGCAGCCCTGGCACAGAAGTACGACACCGAC  
AAACGGGTGCTTGCCACGCCAGTCGGCCCCCTTAGTAGTGTGGAAATCAAATTCTCC  
GACTGTGAAAAGCCCTCCTGTCCACGGTCTGGGCTGTAGAACACTTCCGCAGCTAC  
ATCGGAGGACAGAAGGTTATTATTGAGACGTGTCACCAACCTGTTGCCTTCCTAAAC  
AGCCAAAGGTTGAGAGAAGGACGAGTCACAAACAGCCGCATAGCCACTTGGATGAT  
GGCACTACAAGGCTATGACATCGAGGTCAAGTACGCTCAAATAACAAGATGGCCC  
TGGGCAAAGGCCTGGCGGAGTGCCACCCTGTGATGAAGATGATCAGTCAGATCCT  
ATATCTCTCCAGCAACCACTCCATCGCTGCCTTCCAACCATCGCTATTATGAGGAG  
AACGTCTGCCAAGATCTTCCCAAGGTCTATGTGGATGGATGCTCCTTCCACCACCAA  
AGTCACCTCCGGGCTGGAGTTGGCATTGCCTGGGTCGACTACA ACTGCAGCGAACC  
AACTCACTACCAACTAGGACCCAAAGACAAGTCAGTACGCAGAGATTGCCGCCATAC  
TCATCGCTTTGCAACAAGCCGTTAAGTTGGCTATCACACAATTTGTAATCTGCTCTGA  
TTCTAACTACGCCCCTCACAGTTTCATCTCCATTTTCCTTTATGGAAGGAAAAAGG  
GATGAAAAATGCCAGGAACAAAGAAGTCAAGCACTCAGAACTTTTCCTGACCTGTG  
ATCAACTGGTAACAGAAAAAGGGTTGATAGTTTACTGGAAGAAGGTCAAAGGTCAC  
TCACAAATTGCTGGGCCAGACAAAGACGGCAACGACGAAGCCGACCGACTAGCCAA  
GCTAGGTGCAGAACAAAGGAATGCACTGGGAGCTACAGGTTCGAGGGATTTCCAAGTC  
CCCAAACCTGCGTTGTGAACGCTATCACCCGACGACAGGCAAGGGAGAGACTAGAG  
AACCCCAAGCCTCTGATCAGATCATTTCATCTGGGACGTAAACCTGGAGATGCAGAT  
TTGGTTGCCATGCAGGAGCAGGATCCCGTCATCAGTGCCATACGCCAGATAGTCGCG  
AACCTCCCCCGCAGGACTCACAACCATTTACTGACAAACCCAAGGAGATACGGGC  
ATTTCAACTGGCATTACCCCATCTGAAGATGGAAAAAGACTTGCTCGTCTACAACCG  
TAATGGCCAAGGACCAAACCGGTGGGTGCTCCCAACCGACCATAGGGGGGTAATGT  
TAACCCACGCTCACGATTCCCCTGTCGGTGGCCACAGAGGTACAAGGCTACTCTANA  
GTACACTTCAGCAAGTCGGGTACTGGCCATCAATGTCCAACGACACTATGTCATACG  
TCCGAGGTTGCCTCACCTGCTGCCAGTTCCAACCGTCACAACCATTTGAATCGCGCCC  
CACTTCAAGGAAGGGGGGTTTCATTCCCATGGTCCCCTCCAGATCGACTGGATTG  
GACCAGTCCCAAATCCTCACGAGGTAACAAGTACCTACTCACGGTTACCTGTGCCT  
TCACAAAATGGGTGGAATGCCTCCCAGCATCCAATGGCACAGCCGTCACCATAGCA  
GTCCTACTGTTGAATCATGTGTTCAAGTCGCTGGGGCCTATCAATCTCCATTGATTCAG  
ACCGAGGAACACATTTACGTCCCATGTCATGACATCGCTATGCAAAAATCCTGGGAG  
TGGAAGTCAGATTCACATCTCTCATCACCCCAATCGTCAGGCCAAGTTGAACGTG  
CCAACCGAACTATCATTCAAATGCTGAAGAAATACGTGGGAAGTAACGGCAAGGAC  
TGGGACATTAACCTTCCCCTGGTGCTAATGGCAATCAGGCTCACCCCGCACCGCTCC  
ACAGGTGTCACCCCTTTGAAATGATGACAGGTAGACAAATGACTCTCCCCCTGCAC  
CTGTTATACTATGCTGAAGACCTCAGCGTCATGACCGCCTACACTGCACATCAATAT

GTGGCAGAGCTGCGTGACCACTTGAAGACTACCTTTGCATGGGCACAGGAAACCCT  
GGAGGCCAGTGTGGAAGCTTCAAAGGCCTATTATGACAGGAAAACCTCCCACCATG  
AATACCATGTGGGAGACAAGGTTTTCCACTTCAAGTTCATAAAAACAGTGGGGGTTT  
CCAAGAAATTCCTCCCCAGCTGGATAGGTCCCTTTGAGGTTGTGGGAAAACCTCCC  
CGGTAGCATAACGAATCAGGATCCCGAAACAGAGAAGACCCCCACATACAAATGG  
GTCCACTCAAACCAAATCAAACCATACAAACCTTCCTCAATCTCAGGAGCAGAGGC  
CACCCCTACAGCAGAAAGGGGGGAGCCATCCCAACTCCAAGAGGAAGAACACTGA  
ACCACTCACAGCATCAATAGTTGCATGCGTCAATTCAAATCCGTCGGCATGCACTAG  
TACCACCTCCATTCCACTCCATAATAACTAGGGTTTTGTTTGTTCAGGATGATGCTCC  
CGTGGATCCTCGGCATACTCTTCACTCCACAAATGGTTCAACCGCTCCAGGTGGTTC  
AGCAAGGCCACCAACGGGCATTGTTTTTCAGAACACACCTGGACTCCTCATCACCC  
GTTGCGGATTGTATACTCAAAGGGTCTACGTACGACTGGACCCCTGGGATGTGTATA  
GAAAACACATCCGTAACCCCCACAGTCGACTGAGGGAAGGTTAAGAGCAATCCAA  
ACGCATGACACAGTGGGACATGCCAAGCAGACCACTAAATATATGCTCGAGCAAAT  
GCAAAGTTGTTGGTCACTGAAAAGACCTCAGTAACCAGAAGAGACCAAAAAGGT  
TCCTTGGGTCCCTCATCCTAGCAGCATCCGCTATCGGATCGCTTTTTCTCTATTGGTGT  
ATCAGTAGCCAATTCAATCAGCGTTGGTGCCTCCAGAGACAGATGAGTGACCTTGA  
GGATGAAATGCCGAAATCCTAGAGAGACTCGACCTCCAACAAGGTCAATTACAGG  
ACCTGGGGAAAACACTCCGGGGTACTGTGTTGGCAGTAAACCTTCACTCCGCTCTCT  
TAAATAATACCATGCATGCCTTAGACACTCTGTGAGTTATCGTGAGTGACGATATAA  
CGTACGTCCAGGTAGTAAAAGACTTAATGCAGGACCTTTTAAGGGAAATTAGTTCCA  
CAGTCAACAGCTTAAGCGCCGGTAGGATTCCACCTATTTGGTGTCTTTAGACCTTG  
TTGAAACAATCTTGCAGTCAGCTACCACTACGATTGTGCAGTCCTCTCAGGTACACC  
TGGCATTTAGTCTCGGCAGTGCAATCCCAATCTCAGTAGACCCACAAAACCTAGAGA  
TAGGTTTTATCATAAACCTACCTATCATCGAACAACAGAACGTGTATCACCTAAAGT  
CCGTTCTAAACGTAGGATTTTGGCGGGGAAACACACATGTTAACATTAAAACACCAC  
CATTACTCGCCTACCATGACGAAAATCCCTCGCTCTATCTCATCCCAAATTTAAGTCT  
ATGTACCAAAAACAAAGGACGTCCATTGGGTTTGTCTTAGCACCCCTTTTATCAGGGA  
TGTTACATATTACCTCTGTGGCCTGCGAGCCGATGCCCCAGAACAAGTGCCAAGG  
CAGCATGTCCACCAGGAATGAGGAGTCAACCGACTAGAGTAGAGCGAGCTGGAGACA  
AATGGTTAGTTAACACACCCCGCCACTGAAGCCATAATGGTCTATGACCGTCATGATA  
CCTCCACTAAACTAAGCCTGATAAACAGACAATGTTCTTGGTGGTTCCCTCAAGGAG  
CCACTATACATATTGGTGACATTGTCCTCCATCACCTCAACTCTGACAGACACGATG  
CGGAGATTGAGATCATGGACGCCTTTATGGGTCACAACCTCACGATCGATACAACCA  
TCCAACAACAGCTCAGAGCTGAAGGAACAAGGAGGTAAAGTTCAGTCTTAGATCA  
TCTGGACTTATCACCAAATTTGGTAACCACTATCGTCAAACACCAAAGTTTGAAGAA  
CGTACCATTAGCATGGTCGCGCTGGGACTGCTTTTTAGTGGATGGATCATCACGATA  
GTTGTGGCTTATCTCTTGTACAAATACATTAAGAACTCCAGGCAAAATTGGATTCA  
CTTCTTTTCATCCCGAAAAGAAGGCTGTGAAAGTTCCTCGTGCTTCCGAAGACATT  
GCATTGACTTAAAAGAAAATCCCTTTTCGGT

> Loki-Pyo consensus sequence *gag* gene

ATGAGTAGCGCGGACAACCTTCCCTCAGGGTCAGAAGACCTGCCCCACTTAGTCGCT  
GATCTGATAAATTTATCTATTGATGATGTGAGTGAGGTAAGTGCATATGATGTCAGT  
ACCTGCGATAAGAAGATTGAGGAACAGATTGGGTACATCAATAACCTTCTGATCCC  
CAACGCTCAATATCCCAAATTTCTGGGTCACCTGACCCTCCTGTATGAACAGAGATCA  
CGGCAGAAAGCCAGAGAACACTCCGAAGCGATCAGTGCCGTGCCAACAGCATGTCA

GACAGAGCTAGATGAAAAGTCCTATTTGCAATCGCAAATTCAGATTACAACAGG  
AAATGGATAAGACCCGTGAAGAATGGGACCAGACACGGCAGGAGTGTGAAGATCT  
GCGTGAACAGGTCAGACATCAGAGTGAAAGAGAGGTGAGAGACACAGGAAACAGT  
CTGTGGACACCTGGACTGGAAACAGGGTCAAGAAGTCCCGTCTCACCCGGTGAAGC  
CAGTGGAAATAGAGCTACTGGAAGAGCGACGGCGAGCACCGCCACGCGAACCTCCGA  
TTGAGGAAGATTGGCGCAGGCATTTTGATGACACTTATCAGAGGCCCTTCCAGCCA  
ATACAAGAGTCAGAGAGGAGCCAGCTGAAACCCCAAGGAGTGCAGTGACTGTTGAC  
TACCAGGCAACACCAACGCCTGTCCAGTGGACCCTGGTAATCCATTCAGACCGGA  
AAGAGCCCCTCTACCAAGAAACCGACCTGCTCCATACCAGGATGATGGAAGAGCTC  
CGTCTATACGCCTGAAGGAGATTTCTATCAGAGAGGAACCAGGCTAACATCGAA  
CATCGGCCTACCACTCAAGCAGATGCACGCTCTGGTCCCCGGTTGCGTCTGAATGG  
CACTCCAGCTCCGGTGCAGGGCGAGCAGATGGTACCAGCCACGATCAGTACTCAGA  
CGACTCTGACAGCTCAATAGCACCTGTGAAAGAAGGAATCCGCACCCGACAGCTCG  
AGTCCCTGTCCAAAGATATTGATCGCTACGATCCCGATGTTTCGAGGGTCCAACGTGG  
ACGATTACCTTCGGGAGGTGGAACGGTGCCTCATGGATTTAGCCAACCCCTCACCCA  
GAGAAAAGTTGAAGCTGATCTGGAAGACAACAGCCCAGAGTGTCCACGCGTTCATG  
GAAACGCTGTCCCCTGACACTAGAGATCGGTATTCCACCCTCTGTCAGGCCCTGCGA  
GAAGAGTACTCACTCTTACCAGACCAGGCCTCTGCAACTCTCGGTGCCTTTGCCGTC  
ATGCAGAGAAAGAATGAATCTCCAGAGAATATTACAGACGTCTGAGAACGGCGTA  
CTTCCAAGGGCGTAATGCCCTGGGTTGGAAGAAGAAACTGCTTTCAAATCCTTGT  
CCTGCACAACCTCCATGATAGTGTGCGGTACGATGTCACCATGCACTGCAGAGCTGG  
TGATCTCACGATGCGAGAGATGAGAAAGTACTCTCAACTAGCCTGGGAGACGCGAA  
CACGCCCAGGTAAAGCACCTGAACAGGACGCGAGGGTCTGGGAATCCAAGCTCAA  
CCCAATGTGGATCTGGCGCTGGAGGGTAACGAGATACCCCTGGCCAAAACACATAT  
CAGAAGGGAGAACCAGGGAACGCCGACCAGTCCAGCAGGATGCTAGGAGAAACCGA  
GAACGGGAGGGATCAAACCAGCCCCGCAACCAGAGGTCTCAATATCCAACATACTC  
TCAACAGAGAGGGAGGGACTGGGCTGAGCGAGATCCACACCAACGCCACGAGAAG  
AAGTTCAGTGATAAATATCCCAAACAAGGGAGACCACAAGAACAAGAAAAGAGAC  
AGGAACATTGGAAGCAACAGGAACATGGTAGAAGACAGGAACCTTGGAAATCAACG  
GGAACGTCGGAATCCAGAGGAACATGGGAGAAGACAAGAACCATGGAATCAACAG  
GAGCCACAAATAAATCCACGAATGGAAGATTTTATACGCCGATGTGTGGCGGAGGT  
CGTAAGGGACCGAGATGTCCCTACCCGCACCCCTGCACCACCTGGCGATCAGAAA  
ATCCAGACAAGGGTCCCCCATCAACGTGA

> Loki-Pyo consensus sequence Gag protein

MSSADNFPSGSEDLPHLVADLINLSIDDVSEVSAYDVSTCDKKIEEQIGYINNPSDPQRSIS  
QILGHLTLLYEQRSRQKAREHSEAISAVRTACQTELDEKSYLQSQNSRLQQEMDKTREE  
WDQTRQECEDLREQVRHQSEREVRDTGNSLWTPGLETGSRTAVSPGEASGIELLEERRR  
APPREPIEEDWRRHFDDTYQRPLPANTRVREEPAETPRSAVTVDYQATPNACPVDPGN  
PFRPERAPLPRNRPAPYQDDGRAPSYTPEGDFLSERNQANIEHRPTTQADARSGPRLRPE  
WHSSSGAGRADGYRHDQYSDDSDSSIAPVKEGIRTRQLESLSKIDIDRYDPDVRGSNVDD  
YLREVERCLMDLANPSPREKLKLIWKTARSVHAFMETLSPDTRDRYSTLCQALREEYS  
LFTDQASATLGAFAVMQRKNESPREYRRLRTAYFQGRNAPGLEEETAFKSLFLHNLH  
DSVRYDVTMHCRAAGDLTMREMRKYSQLAWETRTRPGKAPEQDARVLGIQAQPNVDL  
ALEGNEIPLAKTHIRRENRRRPVQQDARRNREREGSNQPRNQRSQYPTNSQQRGRDW  
AERDPHQHKKFSDKYPKQGRPQEQEKRQEHWKQEQEHGRRQEPWNQRERRNPEEHG  
RRQEPWNQEQEPQINPRMEDFIRRCVAEVVRDRDVPTRTPAPPGDQKNPDKGPPST\*

> Loki-Pyo consensus sequence *pol* gene

TTGGGCGACCTCGTCCGGAAAGGCAACGCACAACGCATCTACACTTCAGTAGTAAT  
AGGAGGCTGCTTCAGCTCCCTGGGCCTACTGGATTCAGGCTCGGAAATCAGCCTGAT  
GTGCGCCACCACTTTCTCCCAAGTTGAAACAACCATGTTATCTCTCGGAAAACCCCT  
GCAGGTTGAAACCTGCAACATTAATATCACCAGCTACACTCAGGACCAGTCATCCAT  
CACAAGACGTGCATGGATTGAGATCACCTTCCAAGAGATGAGTCTGGCACATCCCTT  
CTATATCTGTTCCATCGATACAGAACCACTACTCATCGGTCAGGACCTGCTGGACCG  
ACTCGCTCCACTCATCGACTGTCGCCAAGGACGCATTTGGGCTCAAGTTGAAAACCC  
CAAACCTCTCGAGCCTAATGTCAATCTTCTCCCAAGTTGATGCCATCCAGACGCC  
CAGTAGAATCTCACCGATGCATATGCCTCTTCCAGAGACCGACCCAGTTCGGACCC  
CCTCTGCACCACGGCAAGTGGGCCTGTGCCACGACCTGACTCAGAGACCACCTTCAA  
ATCCCATGCTTCCTTCTATGTTCACTGAACAATGAGAACCCGTCATTGTACGTTCCC  
CGCATTACAGAAGATGTTTTCTAAATGGCGTTCGAATCCCAAACACCCTAGTAGCC  
CTGTGGTCTGAAAAATCCGCAATCAGTACGGACATATACTGATCTATGCAAACCTA  
GAACTTCCACCTATCTTTGTGCAACGCCGACACCGTATACTCTCAGCAGAAATACCA  
CAAACCTCCTATCAAAGCGACTGGAGTGTGCGCTATCTCCGTGCGGATTGGAAAACG  
ACAGATCTGGCACTTTGTGAGTGTGATTCCCAACTTCACTCATCATTGATGGTGGG  
GGCAGATCTCCTCATCAGACTCGGAACACAGGTGGATAACCATAAACCAAGTGTGT  
GGTCCCAGGTCAGGGCAGAAAGACACTCCCTGTCTGCTGACCCAGACCAGATGCTC  
TCCGGACAAACGATTCCCCAGGCATGCCAGGTCGCCAGTGAGGTTGACATGGTCATT  
CCTCCACGAACTGCTGGGGCCCCATCCGACTTGAAATCCTCAAAGGACAAAGGATC  
CCGGGCCCTCAGGCTTTCTTCCAGCCTTCGCCCTCCTTCCGGGAACTCAACCTGGAA  
GTCTGTGGCACACCTCTGCTGGAGTTGCAGCAGATCCACTTATGTACTTGTGAAAAA  
TCCCACACACTGCCCCGTTCCATTGAAGGCACACCAAGCGATAGGAATGTTGATCGA  
CAGCTCATTCCACGATTTCGAACTGACTATACTGTCATTGGGGAGCTTCCCCCTTCT  
CTGATCAAGGATGGTGATGTGGATCAAGTCTCTCATAATTTCCAACCAGCATGATC  
ACTGTTATGCGTCATGAGTCGCTGCAAGACGAAGCCATTTGTGGAGCCTCTCTGACG  
ACAGAAGGCGACATGATGGTGTATGCTCTGGCAGCTCAACCAGGACAGGACGTCTC  
AGAGGATGCTCAACCAAACGAACTGTATCCAGGGTTTGAGGCTGAGATCAAGCAAC  
AACTGGAGAATGCAGATGCCTTGACATCAGACACACAGAGAGAAGTGCTTCGGGAT  
CTGTTCTTGATTTCCAGTCAATCTTCTCAAAGATTCTACTGACTGCGGGGTCAAAA  
ACCTCCACACTGTGCGCATCCCCACTGATCCAAATGCCCTACCAACCTTCGTACGTC  
AGTACAAAATCCATTGGCAGCCTACGAGTCCATCCAAGACATCCTTGACACCCTGC  
TAGAGAAACGAATAATCAGGGAAATGCAACTCAACATAAATTCCCCCATTGGCCG  
GTGTTAAAACCAACTGGAAAATGGCGTCTCACAATTGATTATCGTCCCCTGAACAAA  
CAAGTTCCCCTGTCCCGCTGGCCGATGATTCACCTGGATCAAGAACTGGCCAAGGTC  
AAGGGAGCCACGTTCTTCTCCACAGTAGACGTTGCAAACGGATTTTGGACTATGAAG  
GTGGATCAAGCCGACCAGTACAACTGGCTTTCTTTCGGAGGCAGCCAATACACC  
TGGAACCGCTGTCCGTTTGGATATTCAAACTCCCCATCGGAGTTCAACATCTTTCTCC  
ACAAAGCCATGAGTGACGCCGCAACCCGGGGTAACCTCATTTACGTGGATGACATC  
CTCATGAGGAGCCAAACCTTCGAGGACCACATAACAGAGATCCGACATGTACTCAC  
TCAACTGTCCAACGCAGGAGCCAAGCTGGCTCTTACCAAAGGCCAGTGGTGTGCGCA  
CCAAGGTAAAATATGTGGGTCTGACAGTCGGTGCTGATGGCATTGAACCCCAAGCA  
GGGCGGATTCGAGCCATTCAGGACATCAAAGCTCCGACACGCCTAACAGAACTTAG  
GAGTTTCTCGGGGTCTGTAATACTCCCGCCAGTTCATCGAAGACTATGCAGAGAT  
AGCCAGACCTCTCAACGAACTCCTTCACAAAGACAAGCCCTTCGAGTGGGAAGAAC



CCCAAGAACAATCCTTCCGTCAGATGAAAGAAAAACTCTGCTCGGCTTCCTGTCTTG  
CCTACCCAGACAAAGACAAAGAGTTCCACCTCGAAGCAAGCTTCTCATCCACTGTG  
TCAGTGCAGCCCTGGCACAGAAGTACGACACCGACAAACGGGTCGTTGCCTACGCC  
AGTCGGCCCCTTAGTAGTGTGGAAATCAAATTCTCCGACTGTGAAAAAGCCCTCCTG  
TCCACGGTCTGGGCTGTAGAACACTTCCGCAGCTACATCGGAGGACAGAAGGTTATT  
ATTGAGACGTGTCACCAACCTGTTGCCTTCCCTAACAGCCAAAGGTTGAGAGAAGG  
ACGAGTCACAAACAGCCGCATAGCCACTTGGATGATGGCACTACAAGGCTATGACA  
TCGAGGTCAAGTACGCTCAAAATAACAAGATGGCCCTGGGCAAAGGCCTGGCGGAG  
TGCCACCACTGTGATGAAGATGATCAGTCAGATCCTATATCTCTCCAGCAACCACT  
CCATCGCTGCCTTCCAACCATCGCTATTATGAGGAGAACGTCTGCCAAGATCTTCCC  
AAGGTCTATGTGGATGGATGCTCCTTCCACCACCAAAGTCACCTCCGGGCTGGAGTT  
GGCATTGCCTGGGTGCGACTACAACCTGCAGCGAACCAACTCACTACCAACTAGGACC  
CAAGACAAGTCAGTACGCAGAGATTGCCGCCATACTCATCGCTTTGCAACAAGCCG  
TTAAGTTGGCTATCACACAATTTGTAATCTGCTCTGATTCTAACTACGCCCGTCACAG  
TTTCATCTCCCATTTTCCTTTATGGAAGGAAAAAGGGATGAAAAATGCCAGGAACAA  
AGAAGTCAAGCACTCAGAACTTTTCCCTGACCTGTGATCAACTGGTAACAGAAAAAG  
GGTTGATAGTTTACTGGAAGAAGGTCAAAGGTCCTCACAATTTGCTGGGCCAGAC  
AAAGACGGCAACGACGAAGCCGACCGACTAGCCAAGCTAGGTGCAGAACAAAGGAA  
TGCACTGGGAGCTACAGGTGCGAGGGATTTCCAAGTCCCCAACCTGCGTTGTGAACG  
CTATCACCCGACGACAGGCAAGGGAGAGACTAGAGAACCCCCAAGCCTCTGATCAG  
ATCATTATCTGGGACGTAAACCTGGAGATGCAGATTTGGTTGCCATGCAGGAGCAG  
GATCCCGTCATCAGTGCCATACGCCAGATAGTCGCGAACCCCTCCCCCGCAGGACTCA  
CAACCATTTACTGACAAACCCAAGGAGATACGGGCATTTCAACTGGCATTACCCCAT  
CTGAAGATGGAAAAAGACTTGCTCGTCTACAACCGTAATGGCCAAGGACCAAACCG  
GTGGGTCGTCCCAACCGACCATAGGGGGGTAATGTTAACCCACGCTCACGATTCCCC  
TGTCGGTGGCCACAGAGGTACAAGGCTACTCTANAGTACACTTCAGCAAGTCGGGT  
ACTGGCCATCAATGTCCAACGACACTATGTCATACGTCCGAGGTTGCCTCACCTGCT  
GCCAGTTCCAACCGTCACAACCATTGAATCGCGCCCCACTTCAAGGAAGGGGGGTTT  
CATTCCCATGGTCCCATCTCCAGATCGACTGGATTGGACCAGTCCCAAAATCCTCAC  
GAGGTAACAAGTACCTACTCACGGTTACCTGTGCCTTCAAAAATGGGTGGAATGCC  
TCCCAGCATCCAATGGCACAGCCGTACCATAGCAGTCCTACTGTTGAATCATGTGT  
TCAGTCGCTGGGGCCTATCAATCTCCATTGATTCAGACCGAGGAACACATTTACGT  
CCCATGTCATGACATCGCTATGCAAAATCCTGGGAGTGGAAGTCAGATTCCACATCT  
CTCATACCCCCAATCGTCAGGCCAAGTTGAACGTGCCAACCGAACTATCATTCAA  
TGCTGAAGAAATACGTGGGAAGTAACGGCAAGGACTGGGACATTAAACTTCCCCTG  
GTGCTAATGGCAATCAGGCTCACCCCGCACCGCTCCACAGGTGTCACCCCTTTGAA  
ATGATGACAGGTAGACAAATGACTCTCCCCCTGCACCTGTTATACTATGCTGAAGAC  
CTCAGCGTCATGACCGCCTACACTGCACATCAATATGTGGCAGAGCTGCGTGACCAC  
TTGAAGACTACCTTTGCATGGGCACAGGAAACCCTGGAGGCCAGTGTGGAAGCTTC  
AAAGGCCTATTATGACAGGAAAACCTCCCACCATGAATACCATGTGGGAGACAAGG  
TTTTCCACTTCAAGTTCATAAAACAGTGGGGGTTTCCAAGAAATTCCTCCCCAGCT  
GGATAGGTCCCTTTGAGGTTGTGGGAAAACTCTCCCCGGTAGCATAACCGAATCAGGA  
TCCCGAAACAGAGAAGACCCCCACATACAAATGGGTCCACTCAAACCAAATCAA  
CCATACAAACCTTCTCAATCTCAGGAGCAGAGGCCACCCCTACAGCAGAAAGGGG  
GGAGCCATCCCAACTCCAAGAGGAAGAACACTGA

> Loki-Pyo consensus sequence Pol protein

LGDLVRKGNAQRIYTSVVIGGCFSSLGLLDSGSEISLMCATTFSQVETTMLSLGKPLQVE  
TCNINITSYTQDQSSITRRAWIEITFQEMSLAHPFYICSIDTEPLLIGQDLLDRLAPLIDCRQ  
GRIWAQVENPKPLEPNVNLPPQVDAIQTSPRISPMHMPLPETDPSSDPLCTTASGPVPRPD  
SETTFKSHASFLCSLNNENPSLYVPRITEDVFLNGVRIPNTLVALWSEKSAISTDIYTDLC  
KLELPPFVQRRHRILSAEIPQTPIKATGVCAISVRIGKRQIWHFVSVIPQLHSSFMVGADL  
LIRLGTQVDTINQVLWSQVRAERHLSADPDQMLSGQTIPQACQVASEVDMVIPRTAG  
APSDLKSSKDKGSRALRLSSSLRPPSGNSTWKSVAHLWCWCSRSTYVLVKNPTHCPVPL  
KAHQAIIGMLIDSSFHDFELTIPVIGELPPSLIKDGDVDQVSHTFPTSMITVMRHESLQDEAI  
CGASLTTEGDMMVYALAAQPQGDVSEDAQPNELYPGFEAEIKQQLENADALTSDTQRE  
VLRDLFLDFQSIFSKDSTDCGVTNLHTVRIPTDPNALPTFVRQYKIPLAAYESIQDILDITLL  
EKRIIRECNSTYNSPIWPVLKPTGKWRLTIDYRPLNKQVPLSRWPMIHLQELAKVKGAT  
FFSTVDVANGFWTMKVDQADQYKLAFSFGGSQYTNWRCPFYNSPSEFNIFLHKAMS  
DAATRGNLIYVDDILMRSQTFEDHITEIRHVLTQLSNAGAKLALTKGQWCRTKVKYVGL  
TVGADGIEPQAGRIRAIQDIKAPTRLTELRSFLGVCNYSRQFIEDYAEIARPLNELLHKDK  
PFEWEEPQEQSFRQMKEKLCASCLAYPKDKKEFHLEASFSSHCLSAALAQKYDITDKRV  
VAYASRPLSSVEIKFSDCEKALLSTVWAVEHFRSYIGGQKVIETCHQPVAFLNSQRLRE  
GRVTNSRIATWMMALQGYDIEVKYAQNKMALGKGLAECHHCDEDDQSDPISLPATTP  
SLPSNHRYYEENVQCQLPKVYVDGCSFHHQSHLRAGVGIWVDYNCSEPTHYQLGPKT  
SQYAEIAAILIALQQA VKLAIQFVICSDSNYARHSFISHFPLWKEKGMKNARNKEVKHS  
ELFLTCDQLVTEKGLIVYWKVKGHSQIAGPKDKGNDEADRLAKLGAEQGMHWELQV  
EGFPSPQTCVVNAITRRQARERLENPQASDQIIHLGRKPGDADLVAMQE QDPVISAIRQI  
VANPPPQDSQPFTDKPKEIRAFQLALPHLKMEKDLLVYNRNGQGPNRWVPTDHRGV  
MLTHAHDSPVGGHRGTRLLXSTLQQVGYWPSMSNDTMSYVRGCLTCCQFQPSQPLNR  
APLQGRGV SFPWSHLQIDWIGPVPKSSRGNKYLLTVTCAFTKWVECLPASNGTAVTIAV  
LLLNHFVSRWGLSISIDSDRGTHFTSHVMTSLCKILGVEVRFHISHHPQSSGQVERANRTI  
IQMLKKYVGSNGKDWDIKLPVLMAIRLTPHRSTGVTPEMMTGRQMTLPLHLLYYAE  
DLSVMTAYTAHQYVAELRDHLKTTFAWAQETLEASVEASKAYYDRKTSHEHYHVGDK  
VFHFKFIKPVGVSKKFLPSWIGPFEVVGKLSPVAYRIRIPKQRRPPTYK WVHSNQIKPYKP  
SSISGAEATPTAERGEPSQLQEEH\*

> Loki-Pyo consensus sequence *env* gene

ATGATGCTCCCGTGGATCCTCGGCATACTCTTCACTCCACAAATGGTTCAACCGCTC  
CAGGTGGTTCAGCAAGGCCACCAACGGGCATTGTTTTTTCAGAACACACCTGGACTC  
CTCATCACCCGTTGCGGATTGTATACTCAAAGGGTCTACGTACGACTGGACCCCTGG  
GATGTGTATAGAAAACACATCCGTAACCCCCACAGTCGACTGAGGGAAGGTTAAG  
AGCAATCCAAACGCATGACACAGTGGGACATGCCAAGCAGACCACTAAATATATGC  
TCGAGCAAATGCAAAGTTGTTGGTCACTGAAAAGACCTCAGTAACCAGAAGAGA  
CCAAAAGGTTCCCTTGGGTCCCTCATCCTAGCAGCATCCGCTATCGGATCGCTTTTCT  
CTATTGGTGTATCAGTAGCCAATTCAATCAGCGTTGGTGCCTCCAGAGACAGATGA  
GTGACCTTGAGGATGAAATGCCGAAATCCTAGAGAGACTCGACCTCCAACAAGGT  
CAATTACAGGACCTGGGGAAAACACTCCGGGGTACTGTGTTGGCAGTAAACCTTCA  
CTCCGCTCTCTTAAATAATACCATGCATGCCTTAGACACTCTGTGAGTTATCGTGAGT  
GACGATATAACGTACGTCCAGGTAGTAAAAGACTTAATGCAGGACCTTTTAAGGGA  
AATTAGTTCACAGTCAACAGCTTAAGCGCCGGTAGGATTCCACCTATTTGGTGTC  
TTTAGACCTTGTTGAAACAATCTTGCAGTCAGCTACCACTACGATTGTGCAGTCCTCT  
CAGGTACACCTGGCATTAGTCTCGGCAGTGCAATCCAATCTCAGTAGACCCACAA  
AACCTAGAGATAGGTTTTATCATAAACCTACCTATCATCGAACAAACAGAACGTGTAT

CACCTAAAGTCCGTTCTAAACGTAGGATTTTGGCGGGGAAACACACATGTTAACATT  
AAAACACCACCATTACTCGCCTACCATGACGAAAATCCCTCGCTCTATCTCATCCCA  
AATTTAAGTCTATGTACCAAACAAGGACGTCCATTGGGTTTGTCTAGCACCCCT  
TTTATCAGGGATGTTACATATTACCTCTGTGGCCTGCGAGCCGATGCCCCAGAACA  
AAGTGCCAAGGCAGCATGTCCACCAGGAATGAGGAGTCACCGACTAGAGTAGAGCG  
AGCTGGAGACAAATGGTTAGTTAACACACCCGCCACTGAAGCCATAATGGTCTATG  
ACCGTCATGATACCTCCACTAACTAAGCCTGATAAACCAGACAATGTTCTTGGTGG  
TTCCTCAAGGAGCCACTATAACATATTGGTGACATTGTCCTCCATCACCTCAACTCTGA  
CAGACACGATGCGGAGATTGAGATCATGGACGCCTTTATGGGTCAACCTCACGA  
TCGATAACAACCATCCAACAACAGCTCAGAGCTGAAGGAACAAGGAGGTAAAGTTC  
AGTCTTAGATCATCTGGACTTATACCAAATTTGGTAACCACTATCGTCAAACACCA  
AAGTTTGAAGAACGTACCATTAGCATGGTCGCGCTGGGACTGCTTTTTAGTGGATGG  
ATCATCACGATAGTTGTGGCTTATCTCTTGTACAAATACATTAAGAACTCCAGGCA  
AAATTGGATTCACTTCTTTTCATCCCGAAAAAGAAGGCTGTGAAAGTTCCTCGTGCT  
TCCGAAGACATTGCATTGACTTAA

>Loki-Pyo consensus sequence Env protein

MMLPWILGILFTPQMVQPLQVVQQGPPTGIVFQNTPLLLITRCGLYTQRVYVRLDPWDV  
YRKHIRNPPQSTEGRLRAIQTHDTVGHAKQTTKYMLEQMQLLVTEKDLNSQKRPKRF  
LGSLLAASAIGSLFSIGVSVANSISVGALQRQMSDLEDEMPEILERLDDLQGGQLQDLGKT  
LRGTVLAVNLHSALLNNTMHALDTLSVIVSDDITYVQVVKDLMQDLLREISSTVNSLSA  
GRIPTYLVSLDLVETILQSATTTIVQSSQVHLAFSLGSAIPISVDPQNLEIGFIINLPIIEQQN  
VYHLKSVLNVGFWRGNTHVNIKTPPLLAYHDENPSLYLIPNLSLCTKTKD VHWVCPSTP  
FIRDVTTYLCGLRADAPEQKCQGSMSRNEESPTRVERAGDKWLVNTPATEAIMVYDR  
HDTSTKLSLINQTMFLVVPQGATIHIGDIVLHHLNSDRHDAEIEIMDAFMGHNLTIDTTIQ  
QLRAEGTKEVKFSLRSSGLITKFGNHYRQTPKFEERTISMVALGLLFSGWIIITIVVAYLL  
YKYIKKLQAKLDSLLFIPKKKAVKVPRASEDIALT\*

>Loki-Str consensus sequence

ATGGTGCTANCTGTCATGACTGTCCTGATCAGGTCAGGGTACAGGAGACCACCACCC  
TACAGATTATCTCCCAAACCCCCAACAGAGGAGGAGAGATCTAGGGGTCTGAAGAT  
GTGGGGGTTTTATGACACCTCATGCCATAATACAGAGAAATTCCTTTGTCCTAACA  
ATGGAGAACTGGCCTCAGAACCTTAAACATGCAATAAAGGAACTTTGGAACAATGG  
TTCCGTCAGCCACAATGGTGGTTATGACGAAAAGTGGAAATATTAATAATGTATGTAA  
CTTTTGTATTTGTTTTTAAAGGTTAAGAGATGACGTTATTATGAAAACATTGTACCTT  
TAAGAGTTTTCCAGTATATGCCTGATGTTTATACATTGTACGCTGTTTGGAATAAT  
CCAAATCAAACAGAATGTTTTGATAAAGATGAAATGTGAAGTTAGTGTCTAAAATC  
GGATTTTTAGCCAAATCTAAGCCTTGCCCCCTGTACTTGGTCCGCCAGAGAATCGC  
CCTAAAGGCTGTTACACCCACTTCTGACCCGAGGGTATAAGACAGGAGAGTGAAGA  
ATTAACATAGTAGACTATTGACCCCAAGCTGCAGCCAAGGTCTAACAAAGTCGACG  
AACCCCAAACGAAACACAAGGTTGAAGACAAAGAAATATTTTTCTACACGAGCTA  
CGGACGAGTAGCTGTGTCTAAGCGGGTGAATTCAAGCCGAACCACCAGCCTCCAC  
TCTCCATTGAATCGTGGTATCGACACCATTGAGCCGAAGCTGTGAGCTCTGAGCTA  
CAGAGCTGTCTGTCCTCAGAAGACCCCTTCCGATCAAGGGTGAGGATCAGACCACT  
TAGCCAAGAAGGACACTGACATCGTGAGGACAACCAGAGAGTTGCGCCGGAGAACT  
GCGTCATTTAGAAGCCTAACGACCCACGCGGAGCTTCCCACCTGAGAACTACAAC  
ACGTAATTACATCATTATATTCTGACCCATAAGAGCGGCAGTTCGGGGCAAGGCTAA  
TTTTAAATAAGCATGGCTGACAAATGAACCCAAATGTATATTTCTCTCGTGACTTCC

TTTCTTTCTCTCTCTTTAAAATCCCCATTTTGGGTAACAAGCGCCATAGTGTGTTGGC  
CCGTTATACTAAGTCCTAATCAATAGCTAGACTGTGTTTTGTGTATGTGCATTTTTAT  
CATCATTTTAGCTTGCTAGTAAATAAATAATCAACTAAGATTGGTGTGGTAAATTCA  
GTGGTAAAGCCCGGGTCCGTGCAGATTCCCGGATTATACGACTTTCAGATTATGAGA  
CTGTAGAGGAAATTGATTAATTTAGCGACTGTTGTAATCGATATTCTGATATCCTTTG  
AGTTAATTTGGGAAATAGAACTCAATCAAACAATGTTCCCATGGTGCCCCAGGTT  
AATGAGTTAATAATTGCTTGATTGCTTAATTCATTTAATCACGTAATTATAAAC  
CGTTAATCATTTCGATGAGCAACAGTCGTCACATTAATAACAACGTCACGACATA  
TGGCGCCCCCTGTGAGGAATCTAAGATAGGACTAGGCCGCACTGTTGTGTTATTCCA  
TATCAATTGTGTAGCAATATATACATTCCATTAATAGCTATAGGCAGGACTAGTG  
CGGGAGAGAAGTGTGTGTGTGTCGTTCCATTTGACCCAGATACTGGTCGGGAGAGA  
ACGACCCCTGTTGTATATCTGACCAAAGCCAGTGTGAAGGGGGTCTACTGAATGCTA  
CGAGCTAGGGCATATGTACCAGCCGATGCAGGCATTCTGAGAAATAATACTAGTTG  
GGCCTAACGTAGTGTTATTTCTGTGATCGCTTTCAGGAGTGATCTGACTCGGTCATA  
AGTAATTCCTAGAGCAGAGGACATATGAGCCAGCCATTACGGAAATTAGAGTAGAT  
ATATTCGTTTGACCGAAGCGAAGTTATTATCTCTCTACCTCTCGCGTTGGGTAACGG  
GGAGAGGTTAAGGGTTGAACGTGAGACGTCACCAAGTAAACCCGTTCCCTTGTTGG  
AGGGAACATCCCTTGTCGGCGAGGGGGAAACCCCGCGCAAGGAAAGCTAAGCATT  
GCGCCAGATGCTAAGCTAACAAAGGGGAGCCGCCATTTTTGTTTTCTCTTTGTTTCAT  
AGTGAATTCCCGCGTTAGACGGGAATCCTGTGTGATCTCAGCTTGGGCTATCCGTAA  
CCTCTGGCGAAGAATCGCCAGTCATTTTTCGTGAAATAAGTCAGGTTACGCTGTAGG  
ATATCAAACCAGTCTTAAGTATTAGATATCATTGTCTTGTTCAATTTTATACATACA  
TTAAATTGATACACTACCTCTCCAGGTTGGTTATGGGAATAATACACACACGAATGT  
GCCATAACCAATGAGACATGGTTAAACTGTTCCACGTTAACTTAGATATAGCAACTA  
TTTCAGGTTAATTAAGCTAATTCCTTTAGCCTATACGGGGTTGACTAATCATTCAA  
TTGATTAATAGATTAAGCTGTTTTACCAGCTTAATGGTGTTTAGGTAGACTTTTTAA  
CAGTTTTGTAAAATTCTATTTTCACTGGTACCCTGTCGATTTTAGCTTGTGTTAACAG  
TGACCTCCGGTGGTGAAGAATCACCAGTAATTATTTTTAAATAATTCAGGTTATGCT  
GTACGATATCTAACCAGTCTCAACTGATTGGATATCATTGTCTCGTTCAATTTAATAT  
ACATTAATTGCTACACTACCGTCCAGGTTGGTTATTGGAATAATACGCAAATAAT  
GTGTTCTAACCAATGAGACATAGTTAAACTTTTCAATGTAACTTAGATATAGCAAT  
TACTTCAGGTTAATTAAGCTAATTCCTTTAGCCTATACGGGGTTGACTAATCATTCA  
AATTGATTAATAGATTAAGCTGTTTTACCAGCTTAATGGTGTTTAGGTAGACTTTTT  
AACAGTATTGTAAAATTCTATTTTCACTGGTACCCTGTCGATTTTAGCTTGTGTTAAC  
AGTGACCTCCGGTGGTGAAGAATCACCAGTAATTATTTTTAAATAATTCAGGTTATG  
CTGTACGATATCTAACCAGTCTCAACTGATTGGATATCATTGTCTCGTTCAATTTAAT  
ATACATTAATTGCTACACTACCGTCCAGGTTGGTTATTGGAATAATACGCAAATA  
ATGTGTACTAACCAATGAGACATAGTTAAACTTTTCAACGTTAACTTAGAGATAGCA  
ACTCTTTCAGGTGAATTAATAATTAATAATCCCAAATAGCCGATACAGGTTAGATTTA  
TCATTAATAATCGATTTAATCAATTAACCTGTTTTGGCAAGTTCAGTAATAACCAAC  
TCACATTACTGACCCAGTCTTGATGATTGATTGACGTTTACAACTGAGTTAAATCGT  
GTTTGCAGCCTCCAATAAAAACCCCAAACATTACGTAAATTGAAATAACTGACAAT  
CATAATAATGAGCAATCCATCAGATGGGTTTCCACCCATTTCCCCTCTAATCAGTGG  
ACCTTCACCCACGGAAAGATTGATCGCGGACCTCAGCAACGATGCAAATCCTAACT  
ATGCCGAGGGGCTGAAAATGTTAGATTTCAATGCCATAAGCGAGAAAAATGCAGAC  
ATTGCGACAGACGCTCTTCAAATAGACCATCAGGCGGAGGCCTTGTGAAGGTTCTC

TCCAGTTTAGCCCTCAACTATGCCACCAGCAGAGATGGACAGTGCACCAGTACCTC  
AGTGCCAGCAGAGGCACGAGCAGGAAGCTGGGGAGTTCAAGGTACAGGTGGAGA  
GAACCAGGGAGCTGGCATCGAAAGCCGAAAAAGATAAGCTACTGCTAGCTGAGGA  
ACTGTGTGTGAGAACAGATAAATTGGAAGATCTGTCTAACACTTATAACAAAGAAC  
GCGAACAACTCTTGACCAAGTCCGTATTCTAAAAGAACAACCTCGGTTTAGCCAAA  
ACTAAATACGATGAAGTCCACGCGAAACTAGATGAATCGGACGAGCTAGCTAGAAA  
ACGGGGCGAGCAAATTGATGCCCTACAAACGGTTGTGAATGAAACCACTCAAAGCA  
ATAATGCTCTATTCCAAAAGCTGCAGACCAAAGACGATCAGTTAATGAACACAATG  
ACCAAGTTGGAGGACAAAACAGCAGAACTCATTGAAGTCGCTGATTTAATGAAGGA  
TGAGAAAGACCAGGTGAGAAAGTTGGAAAATGTGACCTCTAAACAAAAGGAGGAC  
ATCGCATCACTGGATCTCTCACTCCACACTCGCGACCTCTCCCTGCAAACCATGACA  
GATAAGTATGAGGCCGAGCGAAAAAAGGGCGACACCTACGTGTGAAAATAAACA  
CCCTCAACTCCAGGTGGACTCTGCGATGCAGCATAACACCACCCTTAGGTATCATC  
TGGAGGAACTCCAGAACAGTCACGCGCTATCGCGGGACAACCAAACCAAGCAACCT  
AGCTCACATCCGGAGCTAAGAGAACGAGGGAATGTAGATGACAGGAGATTTAGCC  
TCTTTCTCTTGGCCATTCGGCCACAGTGAATTGGGGCCTCCTCGCCAACACAACCA  
CAGCTTGACTTTTCTCTTGGCCTCTCGGCCACAATTCTCCACGGGAGAGTGCAGA  
TGCTCCCCGCGCACTTGGCGGGGATCGCCTTGACAAAATCGTCAAAAACCTCCGCCT  
CTTCGACCCCGTTCCGGGAAAGCCAAACGACACTGAGACATTCTTAGCAGACATAG  
AGGACGCCTTGGATGGCTACCCAAACGCTACGAATGCAGACAGGCTCTATCTTTTGA  
AGCGAACGTCCAACAGACACGTGACAAGGTTTCATCCGTCTACAAGAGCAACACGTG  
CAAAACGACTATGCTAAACTTGCCACGGTTTTGAAAATAGAATTCAGTGGTTCTGCG  
ACTCGCAAACACGATAGTTCGTTGGCTAACAATATCAGACAAGCTCGAAATGAACA  
CCCACAAGCCTACTATCACCGGCTTCGTTTCTGCTTACTTTGGCATGCTCACTGAAAC  
AGGAATGGAAGACCTATTACCGTTCAAACAACCTTTTTCTGTCAAACATGTCTCCCAA  
CTTCATTAACACTTGGGCCCTACTGCCACGTCGGGTTGCCAATCTCGACGCTCCG  
AGAGCTGGCAAGCACCGCTTTTGAAGCATCAAAGCAAGCCGGGCTAAGAGCCCGG  
ACACCTCGACTTTCGAGCTTAGGCGGGAACCATCACTCGAATTAGAAGGGGCTGCAT  
CAGGGACATATGCTGTAAAAGAGGACGATCAAAGGGGGTGGCTACCAAGTAACCAC  
CACCCCGACAACCACCGCGTAACAATAGCTACGATGAACGTCCCAATCTAACAG  
GTCCCGTAGAGATCAACCTAGCCGACATGCCCTCCGCCTAACTCTCACAAGGGTC  
AGGACACAAGGGTAACAAGCGTAACAAGGGCAACAAAGTGTTCACAATGATTTAA  
ACGCTAACCGAAATGATATAGAAGCTCTGATAAAAGATGTACTGCATCGTAAGAAA  
TTTGAGAAAGAGGACAAGGATAAATCCTCAGGACTAGGCGTAAAATCGTTGGAAAC  
CGAGTCCGCCGAAATTCATGCAATTCAAGAGGACGCAAACATTTCCATTACCCCGC  
CCCCACTCGAATCCCTGTCCAGGTACCGCCCGTTCTAGACACAAGCCCGCAGGTTTT  
GTCTACAGACTTGGACACGGAGGTGGAGATGCACGAGATAAGCAGCTTTGCAACAG  
ATGATTCCTCTACCATTCCGATAGAGGACCCACTGGGTCACGTAGGTAACCTTATCTG  
TCTTGGAAATCGACGCAGATTACAAACCGCTCCGTTCTCCAACCCACTCCATTTTG  
TTGGGGATATGACGAGAAAAACCAACTCGAACAGGCCATAACCTTAGAACAGTCTG  
GAGGACTGTGTGACCTGTCACGCTCTGATAGATTCGGGTTCAACAATTTCCCTCATA  
TCCGAAACCTTGCTGGATGAACTAAAAGGGCAGTGGACCCAACAAAACGTTGGTT  
GAAAACGGAACATTGCGATACGAATCTTCGAGGTTTCACTCAAGCTACCTCGCCCCT  
AACCAAACGTCTCCTACTTAACTCAACTTCGAAAGCGTGTCACTGATACACCCCGT  
GTATGTGACTAGCATCGAAATCGAACGAATGCTGATTGGGAGTGATTTAATTGACCG  
TTTGGTACCACTAATGGATTGGAAAACCAATCAAATCTGGTCACAAATACCTATGCC

AACTCCGTTGACTTCGCCGCATTCTTCCAAGGCTACCTGCCATACATTGTGCAACGA  
CGTGGGTCGACGTCAGCATCTGACGCAAACCCTGTGAACTTGGCCATGAGCCCGCC  
ATTTGTGGCAAAGGACAATGTGAGTTCGACTCGGAACTTAACCGAACATGTGGTTTT  
CTTGTGCGGCTTGGGTGATTCACCAGCCGACACTTACCGCCCTCCTCTGATAGGGGG  
CGTGTGCCTAAACGGCACTATGGCTGAGGATAACCAGGCTGGCCACCTGGTCAGAAA  
AATCCGCAATCAGTTTGGAAATGTTCAACGAAATTTGAAAACGGCTAACTGCCATC  
CCCTTGTGCCGAAAACGTTTAGATTTCCACTGGGAACGACTCCCCAGACAACACTCA  
CCGCAATAGGGGTGTGTGCGCTATCGATCCGCATTGGAACCAAGGAATTATCCCACT  
ACCTACTGGTTGTCGCGGACCTCCACATACAGTCTATGTGGGAGCGGACATTTTGG  
TAAGATTGGGTGTTAAACTTGATACCATACACCAAGTTCTTTGGTCTTTGGCGCAGC  
CAAACCAACATGCCTTGTCTTTCGACCCGGTGCGAATGGCTTCCGGGCAGACTATTC  
CTGAAGCTTGCAAGACGATAACTGAGTCCGCCATGTTGATACCGGCAAGAACCACA  
GAGGTTTCTGTAAGACTGAACCTGGCGCCCGGATACCGGATGGAAGGCACCACTGC  
GTTCTTCCAACCCTCTCCAAAACACTATTCGACTTGGGGCTAACTATCAATGGCAACCC  
ACTGTTGGAACAAACCGCTAGATCCACTTACCTCCTGGTACAAAATCTGACTCAAGC  
GGATATTTCCATTCCCTCGGCACACTCAGCTAGGAACATTGATCGATTACGCCTTCCA  
TGATTTTGAAGTAGTTGTTCCCTGTGATTGGGCCTCTTCCGTCCTCCCTAGACCTAGAT  
GGCGAGGGAGGTACGCTGTTTACTTGTGAGTCAAAGCAATAGCACTAACTCCCGTA  
TTGCCACTGGACGACACATCGGCATTCCGGCTGGATGTCGATCCTGACAGCAACCTG  
TTAATATACTCCATCGTCACGGAGGATGATATTGCGTCTCCTCCTGCATGCGAAGTA  
CACTCTTGTGAGGAAACAACCGATGACTCTTCCAAAGGTGACATGCCGTCACCACCC  
GATGAAGACCTGTACAATGTCGCCGAACCATATCCTGGTTTCCATGCACAGGTAATA  
CAACTACTGTCGGAGGCTGATGCTCTTGTCAATGACACTGAACGCCATCAGTTGAGA  
GAATTGTTTAAACAAACACAGTGAGATCTGGTCGACAGACTCGCTGGATTGCGGGGTT  
ACGGGTATCCATGTGGTGCGTATTCCTACGCCACCCGGAGCAACTCCTACGTTTCGTT  
AGACAATAAAAATCCCGCTCGCAGCATAACGACAGCAGTACAAGAGATTATCGATTC  
CTTATTAGCTAAACGGATAATCAGGGAATGTAACAGTACGTACAGCGCTCCCGTGTG  
GCCCGTTCTGAAACCAACGGGTAAATGGCGTCTTACCATTGACTATAGACAACCTCAA  
CAAACCTGGTTCCGTTGTCTCGTTGGCCAATGACACAGCTCGACCAAGAGTTGCCAAA  
GGTGGCAAACGCCAAGTACTTCTCCACCGTCGACGTGGCAAATGGTTTCTGGACCAT  
GACAGTCGACCCGCGTGACCAACACAAGTTGGCTTTCTCTTTCGAACAAGCTCTT  
CACGTTCAATCGTTGCCATTCCGGGTATGCGAACTCCCCCTCAGAGTTCAACATCTT  
CCTGCACAAGGCGATGCCAGACGCAGCCTCTAGGGGGACGATAATTTACGTGGACG  
ACGTTCTCATGAGAAGTGAGACTTGGTCACATCACCTCAATGAAATGGACCACGTT  
TCACCCAACCTCGGGACTGCAGGGGCTAAGTTGGCCATCATGAAAGGACAATGGTGC  
AGGACCAAGGTAACACTACGTTGGGCTTCTGGTGGGTGCCGAGGGCATCCTGCCACA  
GTCTAACC GAATCCAAGCAGTCCGCAACATCAAAAACACCTACAAACCTTACGAGG  
TGCGCAGCTTCTTGGGAGTATGTAATTACTCCCGTCAATTCATCGAAAACACTACGCCG  
ACTTGTCAAACCGTTGACTCACCTTCTTTCAGAAAGACACCCCATTCGTTTGGGATG  
TCACTACAACGAAGCGGTGGCTTCTTGAAAAACCTGCTTTGCGAGGCACCCTGCC  
TGGTATACCCCAACAAAGACAAGACATTCTTTTTGGAAGTCGGTTTCTCAGAGCACT  
GCCTTAGCGCTGGGTTGTACCAAAAATACGACCAAGACAAACGTGTGGTTGCTTACG  
CGAGCAAAACACTCAACCCCGCCGAACACAAATACTCAGACTGCGAAAAAGCGCTG  
CTGTGACAGTCTGGGCGATCAAACACTTACCAGTTATGTCGGCGGACAAAAGGT  
GATCATAGAAACATGTCACCAGCCTGTGACTTTTCTGAAAAGCCAACGAATCCGTGA  
GGGTGCTGTACACAACAGCAGGATAGCGGCTTGGCTCATGACGCTGCAGAGCCATG

ATGTAGTAATCAACTACGCAAAAAGCAAAGAACCTGCCTTTGGGCAGTGCTTTGGCG  
GTGTGTCAACACTGTGGTGACGATGAAACCGACTCCGGACCACCCCGCGTGACAT  
CGCTCCGCCATTGCCTTCGAACCATCACTATTTGAAGAGAACGTGTGTCTCGACAT  
GCCGATGGCATTGTAGATGGCTGTTCTTACCGCCATCTAGACCACTTGCAAGCTGG  
GGTGGGATTGGTATGGCACAACGACATTCCGTGCAAACCACTTCAATTTAGCTTGG  
CAACAAGACCAGCCAGTTTGCAGAAGTGGCTGGCGTGCTGATCACCTGCAAACAG  
CGGTGAAACACGAATTGGCAGAAGTGGCGATCTGCACCGACTCTAACTACGCGAGA  
CTCACCTTCTTATGCCACTTGCCGTTTTGGAAACAAAAGCACATGACTACTTCAAGT  
GGTAAAGAGGTGAAAAACAAGAGCTCATTCTAGCTTGTGATGATCTCATCACCAA  
ACACGACATACAGGTGTATTGGAAGAAAGTCAAGGGACACTCCAAATCACCTGGTC  
GTGACAACTTGGCAACGACCATGCTGACAGCATGGCGAAATCTGGTGCAATTAC  
GGCACCCCTTGGGTGTTTGCTGCTCGAGACGAAAAACCCACTGAGGAAGCTATGGT  
GTCTGCGGTAACGCGTAGCCATGTAGCACCCACGGAAAACGTCGTCGCACAAACATA  
ATGTGTTGCTAACGCATTCATTCATGAATGGCGACCTGGTAGCAATGCAACACCAAG  
ATGAGTCCCTCGCCACTTTGATGGCATTCTGTGCGGATCCTGTCAACCACCCAGTGT  
CCGAACCTGGCTTTGGCAGGTTACACGACTTGCCTTCCGCTGTACGCAACTAAACAGC  
ACCTCACACTTGTAGATGACCTATTGGTGTATGTTTCAGAAACCGACACCGCTCGAA  
GGTGGGTGGTTCCATAAAACACAGAGGGGGATAATGATAGCTCATGCCACGACGAG  
CCATGTGGAGGCCATAGGGGGGTCAAGGCTACATGTGAAACATTGCGACAGGTGGC  
CCACTGGCCTCATATGGAACAAGACGTGGCACGATACGTGAGGGGGTGTCTAGTTT  
GCTGCCAGTTTCAACCCACCAAGCCACTTACAGAGCACCCCTGCAACGCAAGGGT  
GTGTCTTACCCCTGGAGCTCGATCCAGATCGACTGGGTCCGCCAGTTGCCAGGTCT  
GCCAGAGGCAACAAGTACCTCCTCACAGTGAAGTTCGCGATTACAAAGTGGGTGGA  
GTGCCTGCCGGCGACCAATGACACAGCGGAAACCACTGCCGTTCTTTTGCTAAACCA  
CGTTTTCAAGTCGTTTCGGCCTGCCAGGAGAAACCGTGGACAGCGACAGAGGAACCC  
ACTTTTCGGCAGCTGTAATGACCGAACTGTGGAAGCTCCTGGGAGTCAAAGCTAAAC  
TCCACATCGCGTACCACCCTAGGAGCTCGGGGGGGGTAGAAAGGAGCAACCAATCA  
ATTGTCAGAATCTTGAGGAAATATGTGGCAGCCAACCACAAAGATTGGGACCTCAA  
ACTCCCATTTGGTACTGATGGCAATCAGAGCCACACGCAACAGGTCTACGGGAATGA  
CACCCCTTTGAGATGATGACGGGCCGGCAAATGACCCTTCCACTGCATCTCCTGTACC  
AACCGGGAGATGTCGCCGACGCCACCGCCTACACGGCTCATCAATACGTGACCGAC  
TTGCGGAACCATCTCCAGACTACCTTTGCGTACGCTCAAGGACAATTGGAAAGAAGT  
GCAGAAGGTGACAAGACCTATTACGACAAAAAAGCCTCACACCAGGTGTTTCGAGGT  
CGGAGATAAGGTGTGGTACTACATATACACCAAACCCGCGGGCGTGCACAAAGT  
TCCTGCCCCACTGGACGGGGCCACACGAGATTGTGGTGAAGCTATCACCTGTAGCTT  
ACCAGATCAAAATCAGCAAAGGTGACAAAAACGCCACATTAAGTGGGTCCACCGG  
AACCAATCAAGTTGTACTCCCCCATGGGAATAGAAGGGGTGCTAGCCAGCAC  
CGAATAGATAAAAACCCCTAGCAAAAACCCAGAGGTACTAAGAAAATTCTTAAGTAC  
CCTCAGCTGATCCCTTCCAGGAGACCAGTACGTTGCACCTAATATCTTTTATTCTCTT  
CCCAGCTACCAGATATACATCTGTTGTCAGTATGATATCGTCCTGCGCTGTACTGAT  
TAAAAATAAGAAAAACAGAAAAATAGTTGTCAAACAATTTTTGTTTACGAATACA  
AATAACTGAAATAATCCAACAATCTCTGATTATGCGTTTCTGTAGGATGGAGTTCCT  
TTGGATGATCCTGACACTCTGCGCCCTGGTCAAACCAACCCAGCAGACGTAATCAC  
GAACGGACCCCTACGGGAATCGTTCTCCGCGACGATCCAGGACTCCTCATAACTAA  
CTGCAGAGTACACACGCAGAGGGTATATGTCCGCCTAGATGCAGAGAATGTGTACC  
GCCAACACATTCCACCTGCGGCGCATTGAGTTGGGCCGGGGCTGACTGGACCAGC

CAGGCAATTAAGCACGCCAGCTAGACACTGCCCATATGTTGGCCAACTCCAAAA  
GTTACAGTAACCCAGTCAGAACTAGCTGAGCCCAGGCGAGAAAAACGATTCGTCG  
GGGCGCTACTATCGATAGGGGCAGCCGTAGGGTCACTATTTGCCCTAGGTACCACTG  
CCGTCAACGCAGTCAGTCTAGCCACAGTCAAGAGGAATGTTAGGGAGATTACTGAA  
GAGATGCCACTTATCCAGCAGCAGATGAAGGCACAGGCCCTTAGGTTGCAACATGT  
GGGAAAGTCTCTCCAGGACACTATTCTGGTGGTCAACACACACGCTACTCTCCTGAA  
CAAACACTATCCTGTCTGTAGGAAAGCTAGCAGAGGTCATGAACCATGACTATGCC  
ATGTCCAATTGGTTCGATTGTTACTGGAGGATTTTCTCCGTGAAGTTAGCTCTTCTAT  
GGACCACTTGCCATGAATAGAATCCCCTCATATCTAGTGCCCCTCTCAATGGTGCA  
CGACATATTGACCTCAGCTACTTCAACCACACTAAGGCCGTTACAATCACATTTGGC  
CTATAGTCTGGGGTCGGCCATCCCAATACACGTTGATGTTGATCGTAATGAAGTGGG  
TTTTCTACTGACGCTGCCGTTGTTGAACTGGAGAATATCTATAGATTGAAAACGGT  
TCTCAATGTAGGATTTTGGCGCGACAGTACCCACGTAAAGATTGCCACGCCCCCAGT  
TGTAGCTTACCAGGAAAACAACCCAGATTTCTATCTCACCCCTAACCTGCTAATGTG  
TACTCTAACCAAGATGTCCACTACCTTTGTCCTAGCAAACCATTTGTCAGGGATAA  
CACTGAGCGTCTTTGTGGTATTAAGCTATCACAGCGAAGAACGCTGTAGAGCCAA  
ACTAACAGCCAGGGATGGGGCCACCACCACACAAGTGGAGGTGGTAGGGAACCGA  
TGGTTGGTCAACACACCGTTTCGCGTCCGCCACTATGACTTACGAACGCCATGACTCC  
ATCACCCAATTGAACCTCCCCAACAGACTGTTTTTGTACGGTACCAGAGGGGGCG  
ATTATTCACGTAGACGACCTCGCTCTATACCACCTTCCCGACGACCGGATAGACACA  
GAGATTGAAATGCCGGACGCTTTTGCTAAACGTTCCCTTGAGTTACCACAAGCCATT  
CAATACCAAATCCAGTACGAGGGACCCATGACTGTGATCTTAGCGTACTGGATGA  
GGCACTGTTAGTCGACCCGACTGACTACAGACCAAAGATTGGTCTGTCGCCCGCTC  
TTGGACGGTGCCGGACAGTATCCTGACTGTTACCATGATCCTTGGTCTCATTTCCCTT  
GGCGTGTGCACCTACTACGTACACAGGCGCACACGTGCAATGGAAGACCTAATGAG  
GTCTTATACTAGGATCACCCGTGGGACGGAAGCGATCCCGATTTTTGGAAAGGTGGC  
AATGGATCCGAAACCCCTCTTACAGGGCCCAGTCCCAGCCTCCTCTCCCGAACTCGC  
TAGGTCAGCCCAGTAATGTCCCTAATGTAAGCTTTGGCCTTCAGGGGCCAAGTTTTT  
CCAAGTGCCTTAACTACCCACCTGCAAGTAGGATCAACCTAGACATGACATTAGAG  
ACAATGCCATGATAGAGCTATTTAGCCAAGGCCTTGGACATATATAGAACATAGTCC  
ATATTAGATGATTAAGGTGTGGTAGACATATTTTGTATACTTTTATGTTTTTATTCCA  
ATTTTTCGTTTCATTACCTTTGACACTTAGGAAGCCTTAGAGCCAAGACACCGCTCCT  
TTGGGGAGGAAATGTAATGATGTATTGCCTGAGTGTTGTGCGTTATTAACGTCTGCC  
AAGTACTGCCTAGGTCCACTAACCGGGATAACCGGACGACGGGCCGGAACACAGA  
GCCACTGCCAGACCTCCTTGATCCATTCTGGTGGTGTATCCACAGCTTGCGGAAAGCC  
TACCAGGGGGAACCACTAAAGGGGGGGGGGCTGCTCTGATGATCCACAGACCAGGA  
CATCCGATGGTCATTCTTATGGTGGGTTGCAACATGCAGAATCATTCCAAGTTGAAC  
CTACCAGAGGGGGACTGTGATGACTGTCTGATCAGGTCAGGGTACAGGAGACCAC  
CACCTACAGATTATCTCCCAAACCCCAACAGAGGAGGAGAGATCTAGGGGTCTG  
AAGATGTGGGGGTTTTATGACACCTCATGCCATAATACAGAGAAATTCCTTTGTCC  
TAACAATGGAGAACTGGCCTCAGAACATTAACATGCAATAAAGGGACTTTGGAAC  
AATGGTTTCCGTCAGCCACAATGGTGGTTATGACGAAAAGTGAATATTAATAATGTA  
TGTAACTTTTGTATTTGTTTTTAAAGGTTAAGAGATGACGTTATTATGAAAACATTGT  
ACCTTTAAGAGTTTTCCAGTATATGCCTGATGTTTATACATTGTACGCTGTTTGGAA  
AATATCCAAATCAAACAGAATGTTTTGATAAAGATGAAATGTGAAGTTAGTGTCTAA  
AATCGGATTTTTAGCCAATCTAAGCCTTGCCCCCTTACTTGGTCCGCCAGAGAA



TCGCCCTAAAGGCTGTTACACCCACTTCTGACCCGAGGGTATAAGACAGGAGAGTG  
AAGAATTAACATAGGAGACTATTGACCCCAAGCTGCAGCCAAGGTCTAACAAAGTC  
GACGAACCCCAAAACGAAACACAAGGTTGAAGACAAAGAAATATTTTTCTACACGA  
GCTACGGACGAGTAGCTGTGTCTAAGCGGGTGAATTCAAGCCGAACCACCCAGCCT  
CCACTCTCATTGAATCGTGGTATCGACACCATTTCGAGCCGAAGCTGTGAGCTCTGA  
GCTACAGAGCTGTCTGTCTCAGAAAGACCCCTTTCCGATCAAGGGTGAGGATCAGAC  
CACTTAGCCAAGAAGGACACTGACATCGTGAGGACAACCAGAGAGTTGCGCCGGAG  
AACTGCGTCATTTAGAAGCCTAAACGACCCACGCGGAGCTTCCCACCTGAGAACTCC  
AACACGTAATTACATCATTATATTCTGACCCATAAGAGCGGCAGTTCGGGGCAAGGC  
TAATTTTAAATAAGCATGGCTGACAAATGAACCCAAATGTATATTTCTCTCGTGTAC  
TTCCTTTCTTTCTCTCTCTTTAAAATCCCCATTTTGGGTAACAAGCGCCATAGTGTGT  
GGCCCGTTATACTAAGTCCTAATCAATAGCTAGACTGTGTTTTGTGTATGTGCATTTT  
TATCATCATTTTAGCTTGCTAGTAAATAAATAATCAACTAAGATTGGTGTGGTAAAT  
TCAGTGGTAAAGCCCGGGTCCGTGCAGATTCCCGGATTATACGACTTTCAGATTATG  
AGACTGTAGAGGAAATTGATTAATTTAGCGACTGTTGTAATCGATATTCTGATATCC  
TTTGAGTTAATTTGGGAAATAGAACTCAATCAAACAATGTTCCCATGGTGCCCCA  
GGTTAATGAGTTAATAATTGCTTGATTCATTGCTTAATTCATTTAATCACGTAATTAT  
AAACCGTTAATCATTTCGATGAGCAACAGTCGTCACATTAATACTAATAACGTCACGA  
CATACCCTACA

> Loki-Str consensus sequence 5'LTR

TGTCATGACTGTCCTGATCAGGTCAGGGTACAGGAGACCACCACCCTACAGATTATC  
TCCCAAACCCCAACAGAGGAGGAGAGATCTAGGGGTCTGAAGATGTGGGGGTTTT  
ATGACACCTCATGCCATAATACAGAGAAATTCCTTTGTCCTAACAATGGAGAACTG  
GCCTCAGAACCTTAAACATGCAATAAAGGAACTTTGGAACAATGGTTTCCGTCAGCC  
ACAATGGTGGTTATGACGAAAAGTGGAATATTAATAATGTATGTAACCTTTTGTATTTG  
TTTTTAAAGGTTAAGAGATGACGTTATTATGAAAACATTGTACCTTTAAGAGTTTTCC  
CAGTATATGCCTGATGTTTATACATTGTACGCTGTTTGGAAAATATCCAAATCAAAC  
AGAATGTTTTGATAAAGATGAAATGTGAAGTTAGTGTCTAAAATCGGATTTTTAGCC  
AAATCTAAGCCTTGCCCCCTGACTTGGTCCGCCCAGAGAATCGCCCTAAAGGCTGT  
TACACCCACTTCTGACCCGAGGGTATAAGACAGGAGAGTGAAGAATTAACATAGTA  
GACTATTGACCCCAAGCTGCAGCCAAGGTCTAACAAAGTCGACGAACCCCAAAACG  
AAACACAAGGTTGAAGACAAAGAAATATTTTTCTACACGAGCTACGGACGAGTAGC  
TGTGTCTAAGCGGGTGAATTCAAGCCGAACCACCCAGCCTCCACTCTCCATTGAATC  
GTGGTATCGACACCATTTCGAGCCGAAGCTGTGAGCTCTGAGCTACAGAGCTGTCTGT  
CCTCAGAAGACCCCTTTCCGATCAAGGGTGAGGATCAGACCACTTAGCCAAGAAGG  
ACACTGACATCGTGAGGACAACCAGAGAGTTGCGCCGGAGAACTGCGTCATTTAGA  
AGCCTAAACGACCCACGCGGAGCTTCCCACCTGAGAACAACAACGTAATTACAT  
CATTATATTCTGACCCATAAGAGCGGCAGTTCGGGGCAAGGCTAATTTTAAATAAGC  
ATGGCTGACAAATGAACCCAAATGTATATTTCTCTCTCGTGTACTTCCTTTCTTTCTC  
TCTTTAAAATCCCCATTTTGGGTAACAAGCGCCATAGTGTGTTGGCCCGTTATACTA  
AGTCCTAATCAATAGCTAGACTGTGTTTTGTGTATGTGCATTTTTATCATCATTTTAG  
CTTGCTAGTAAATAAATAATCAACTAAGATTGGTGTGGTAAATTCAGTGGTAAAGCC  
CGGGTCCGTGCAGATTCCCGGATTATACGACTTTCAGATTATGAGACTGTAGAGGAA  
ATTGATTAATTTAGCGACTGTTGTAATCGATATTCTGATATCCTTTGAGTTAATTTGG  
GAAATAGAACTCAATCAAACAATGTTCCCATGGTGCCCCAGGTTAATGAGTTAAT

AATTGCTTGATTCAATTGCTTAATTCATTTAATCACGTAATTATAAACCGTTAATCATT  
CGATGAGCAACAGTCGTCACATTAATAACAACGTCACGACA

> Loki-Str consensus sequence 3'LTR

TGTCATGACTGTCTGATCAGGTACAGGTACAGGAGACCACCACCTACAGATTATC  
TCCCAAACCCCAACAGAGGAGGAGAGATCTAGGGGTCTGAAGATGTGGGGGTTTT  
ATGACACCTCATGCCATAATACAGAGAAATTCCTTTGTCTAACAAATGGAGAAGTGT  
GCCTCAGAACATTAACATGCAATAAAGGGACTTTGGAACAATGGTTTCCGTCAGCC  
ACAATGGTGGTTATGACGAAAAGTGGAAATATTAATAATGTATGTAAGTTTGTATTG  
TTTTTAAAGGTTAAGAGATGACGTTATTATGAAAACATTGTACCTTTAAGAGTTTTCC  
CAGTATATGCCTGATGTTTATACATTGTACGCTGTTTGGAAAATATCCAAATCAAAC  
AGAATGTTTTGATAAAGATGAAATGTGAAGTTAGTGTCTAAAATCGGATTTTTAGCC  
AAATCTAAGCCTTGCCCCCTTACTTGGTCCGCCAGAGAATCGCCCTAAAGGCTGT  
TACACCCACTTCTGACCCGAGGGTATAAGACAGGAGAGTGAAGAATTAACATAGGA  
GACTATTGACCCCAAGCTGCAGCCAAGGTCTAACAAAGTCGACGAACCCCAAACG  
AAACACAAGGTTGAAGACAAAGAAATATTTTTCTACACGAGCTACGGACGAGTAGC  
TGTGTCTAAGCGGGTGAATTCAAGCCGAACCACCCAGCCTCCACTCTCCATTGAATC  
GTGGTATCGACACCATTCGAGCCGAAGCTGTGAGCTCTGAGCTACAGAGCTGTCTGT  
CCTCAGAAGACCCCTTCCGATCAAGGGTGAGGATCAGACCACTTAGCCAAGAAGG  
ACACTGACATCGTGAGGACAACCAGAGAGTTGCGCCGGAGAAGTGCCTCATTTAGA  
AGCCTAAACGACCCACGCGGAGCTTCCCACCTGAGAAGTCCAACACGTAATTACAT  
CATTATATTCTGACCCATAAAGAGCGGCAGTTCGGGGCAAGGCTAATTTTAAATAAGC  
ATGGCTGACAAATGAACCCAAATGTATATTTCTCTCGTGTACTTCCCTTCTTCTCTC  
TCTTTAAAATCCCCATTTTGGGTAAACAAGCGCCATAGTGTGTTGGCCCGTTATACTA  
AGTCCTAATCAATAGCTAGACTGTGTTTTGTGTATGTGCATTTTTATCATCATTTTAG  
CTTGCTAGTAAATAAATAATCAACTAAGATTGGTGTGGTAAATTCAGTGGTAAAGCC  
CGGGTCCGTGCAGATTCCCGGATTATACGACTTTCAGATTATGAGACTGTAGAGGAA  
ATTGATTAATTTAGCGACTGTTGTAATCGATATTCTGATATCCTTTGAGTTAATTTGG  
GAAATAGAACTCAATCAAAACAATGTTCCCATGGTGCCCCAGGTTAATGAGTTAAT  
AATTGCTTGATTCAATTGCTTAATTCATTTAATCACGTAATTATAAACCGTTAATCATT  
CGATGAGCAACAGTCGTCACATTAATAACAACGTCACGACA

> Loki-Str consensus sequence *smc-gag-pol* gene

CTGACAATCATAATAATGAGCAATCCATCAGATGGGTTTTCCACCCATTTCCCCTCTA  
ATCAGTGGACCTTCACCCACGGAAAGATTGATCGCGGACCTCAGCAACGATGCAAA  
TCCTAACTATGCCGAGGGGCTGAAAATGTTAGATTTCAATGCCATAAGCGAGAAAA  
ATGCAGACATTGCGACAGACGCTCTTCAAATAGACCATCAGGCGGAGGCCTTGTG  
AAGGTTCTCTCCAGTTTAGCCCTCAACTATGCCACCAGCAGAGATGGACAGTGCAC  
CAGTACCTCAGTGCCAGCAGAGGCACGAGCAGGAAGCTGGGGAGTTCAAGGTACA  
GGTGGAGAGAACCAGGGAGCTGGCATCGAAAGCCGAAAAAGATAAGCTACTGCTA  
GCTGAGGAAGTGTGTGTGAGAACAGATAAATTGGAAGATCTGTCTAACACTTATAA  
CAAAGAACGCGAACAAACTCTTGACCAAGTCCGATTCTAAAAGAACAACCTCGGTT  
TAGCCAAAATAAATACGATGAAGTCCACGCGAACTAGATGAATCGGACGAGCTA  
GCTAGAAAACGGGGCGAGCAAATTGATGCCCTACAAACGGTTGTGAATGAAACCAC  
TCAAAGCAATAATGCTCTATTCCAAAAGCTGCAGACCAAGACGATCAGTTAATGA  
ACACAATGACCAAGTTGGAGGACAAAACAGCAGAAGTCAATTGAAGTCGCTGATTTA  
ATGAAGGATGAGAAAGACCAGGTGAGAAAGTTGGAAAATGTGACCTCTAAACAAA  
AGGAGGACATCGCATCACTGGATCTCTCACTCCACACTCGCGACCTCTCCCTGCAAA

CCATGACAGATAAGTATGAGGCCGAGCGAAAAAAGGGCGACACCTACGTGTGCGAAA  
ATAAACACCCTCAACTCCCAGGTGGACTCTGCGATGCAGCATAACACCACCCTTAGG  
TATCATCTGGAGGAACTCCAGAACAGTCACGCGCTATCGCGGGACAACCAAACCAA  
GCAACCTAGCTCACATCCGGAGCTAAGAGAACGAGGGAATGTAGATGACAGGAGAT  
TTCAGCCTCTTTCTCTTGGCCATTCGGCCCACAGTGAATTGGGGCCTCCTCGCCAACA  
CAACCACAGCTTGACTTTTCTCTTGGCCTCTCGGCCACAATTCTCCACGGGAGAG  
TGCAGATGCTCCCCGCGCACTTGGCGGGGATCGCCTTGACAAAATCGTCAAAAACCTT  
CCGCCTCTTCGACCCCGTTCCGGGAAAGCCAAACGACACTGAGACATTCTTAGCAGA  
CATAGAGGACGCCTTGGATGGCTACCCAAACGCTACGAATGCAGACAGGCTCTATC  
TTTTGAAGCGAACGTCCAACAGACACGTGACAAGGTTTCATCCGTCTACAAGAGCAA  
CACGTGCAAAACGACTATGCTAAACTTGCCACGGTTTTGAAAATAGAATTCAGTGGT  
TCTGCGACTCGCAAACACGATAGTTCGTTGGCTAACAAATATCAGACAAGCTCGAAAT  
GAACACCCACAAGCCTACTATCACCGGCTTCGTTACGCTTACTTTGGCATGCTCACT  
GAAACAGGAATGGAAGACCTATTACCGTTCAAACAACCTTTTTCTGTCAAACATGTCT  
CCCAACTTCATTAACTACTTGGGCCCTACTGCCACGTCGGGTTGCCAATCTCGACG  
CTCCGAGAGCTGGCAAGCACCGCTTTTGAAGCATCAAAGCAAGCCGGGCTAAGAG  
CCCGGACACCTCGACTTTCGAGCTTAGGCGGGAACCATCACTCGAATTAGAAGGGG  
CTGCATCAGGGACATATGCTGTAAAAGAGGACGATCAAAGGGGGTGGCTACCAAGT  
AACCACCACCCCGACAACCACCGCCGTAACAATAGCTACGATGAACGTCCCCAATC  
TAACAGGTCCCGTAGAGATCAACCTAGCCGACATGCCCTCCGCCTAACTCTCACAA  
AGGGTCAGGACACAAGGGTAACAAGCGTAACAAGGGCAACAAGTGTTCACAAT  
GATTTAAACGCTAACCGAAATGATATAGAAGCTCTGATAAAAAGATGTACTGCATCGT  
AAGAAATTTGAGAAAGAGGACAAGGATAAATCCTCAGGACTAGGCGTAAAATCGTT  
GGAAACCGAGTCCGCCGAAATTCATGCAATTCAAGAGGACGCAAACATTTCCATTA  
CCCCCGCCCCACTCGAATCCCTGTCCAGGTACCGCCCGTTCTAGACACAAGCCCGC  
AGGTTTTGTCTACAGACTTGGACACGGAGGTGGAGATGCACGAGATAAGCAGCTTT  
GCAACAGATGATTCCTCTACCATTCCGATAGAGGACCCACTGGGTACGTTAGGTAAC  
TTATCTGTCTTGGAAATCGACGCAGATTACAAACCGCTCCGTTCTCCCAACCCACTC  
CATTTTGTGGGGATATGACGAGAAAAACCAACTCGAACAGGCCATACCTTAGAAC  
AGTCCTGGAGGACTGTGTGACCTGTCACGCTCTGATAGATTCGGGTTCAACAATTC  
CCTCATATCCGAAACCTTGCTGGATGAACTAAAAGGGCAGTGGACCCAACAAAAC  
GTTGGTTGAAAACGGAACATTGCGATACGAATCTTCGAGGTTTCACTCAAGCTACCT  
CGCCCCTAACCAAACGTCTCCTACTTAAACTCAACTTCGAAAGCGTGTCACTGATAC  
ACCCCGTGTATGTGACTAGCATCGAAATCGAACGAATGCTGATTGGGAGTGATTTAA  
TTGACCGTTTGGTACCACTAATGGATTGGAAAACCAATCAAATCTGGTCCAAATAAC  
CTATGCCAACTCCGTTGACTTCGCCGCATTCTTCCAAGGCTACCTGCCATACATTGTG  
CAACGACGTGGGTCCGACGTCAGCATCTGACGCAAACCCCTGTGAACTTGGCCATGA  
GCCC GCCATTTGTGGCAAAGGACAATGTGAGTTCGACTCGGAACTTAACCGAACAT  
GTGGTTTTCTTGTGCGGCTTGGGTGATTCACCAGCCGACACTTACCGCCCTCCTCTGA  
TAGGGGGCGTGTGCCTAAACGGCACTATGGCTGAGGATAACCAGGCTGGCCACCTGG  
TCAGAAAAATCCGCAATCAGTTTGGAAATGTTCAACGAAATTTGAAAACGGCTAA  
CTGCCATCCCCTTGTGCCGAAAACGTTTAGATTTCCACTGGGAACGACTCCCCAGAC  
AACACTCACCGCAATAGGGGTGTGTGCGCTATCGATCCGCATTGGAACCAAGGAAT  
TATCCCACTACCTACTGGTTGTGCGGACCTCCACATACAGTCTATGTGGGAGCGG  
ACATTTTGGTAAGATTGGGTGTTAAACTTGATACCATACCAAGTTCTTTGGTCTTT  
GGCGCAGCCAAACCAACATGCCTTGTCTTTCGACCCGGTGCGAATGGCTTCCGGGCA

GACTATTCCTGAAGCTTGCAAGACGATAACTGAGTCCGCCATGTTGATACCGGCAAG  
AACCACAGAGGTTTCTGTAAGACTGAACCTGGCGCCCGGATACCGGATGGAAGGCA  
CCACTGCGTTCTTCCAACCTCTCCAAAATATTGACTTGGGGCTAACTATCAATG  
GCAACCCACTGTTGGAACCTAACCGCTAGATCCACTTACCTCCTGGTACAAAATCTGA  
CTCAAGCGGATATTTCCATTCCCTCGGCACACTCAGCTAGGAACATTGATCGATTACG  
CCTTCCATGATTTTGAAGTAGTTGTTCCCTGTGATTGGGCCTCTTCCGTCCTCCCTAGA  
CCTAGATGGCGAGGGAGGTACGCTGTTTACTTGTGAGTCAAAGCAATAGCACTAA  
CTCCCGTATTGCCACTGGACGACACATCGGCATTCCGGCTGGATGTCGATCCTGACA  
GCAACCTGTTAATAATACTCCATCGTCACGGAGGATGATATTGCGTCTCCTCCTGCAT  
GCGAAGTACACTCTTGTGAGGAAACAACCGATGACTCTTCAAAGGTGACATGCCG  
TCACCACCCGATGAAGACCTGTACAATGTCGCCGAACCATATCCTGGTTTCCATGCA  
CAGGTAATACAACTACTGTCGGAGGCTGATGCTCTTGTCAATGACACTGAACGCCAT  
CAGTTGAGAGAATTGTTTAAACAAACACAGTGAGATCTGGTTCGACAGACTCGCTGGA  
TTGCGGGGTTACGGGTATCCATGTGGTGCGTATTCTACGCCACCCGGAGCAACTCC  
TACGTTGTTAGACAATAAAAATCCCGCTCGCAGCATAACGACAGTACAAGAGA  
TTATCGATTCCCTATTAGCTAAACGGATAATCAGGGAATGTAACAGTACGTACAGCG  
CTCCCGTGTGGCCCGTTCTGAAACCAACGGGTAATGGCGTCTTACCATTGACTATA  
GACAACTCAACAACTGGTTCCGTTGTCTCGTTGGCCAATGACACAGCTCGACCAAG  
AGTTGCCAAAGGTGGCAAACGCCAAGTACTTCTCCACCGTCGACGTGGCAAATGGTT  
TCTGGACCATGACAGTCGACCCGCGTGACCAACACAAGTTGGCTTTCTCTTTCTCGA  
ACAAGCTCTTACGTTCAATCGTTGCCATTCCGGTATGCGAACTCCCCCTCAGAGT  
TCAACATCTTCCCTGCACAAGGCGATGCCAGACGCAGCCTCTAGGGGGACGATAATTT  
ACGTGGACGACGTTCTCATGAGAAGTGAGACTTGGTCACATCACCTCAATGAAATG  
GACCACGTTCTCACCCAACCTCGGGACTGCAGGGGCTAAGTTGGCCATCATGAAAGG  
ACAATGGTGCAGGACCAAGGTAAACTACGTTGGGCTTCTGGTGGGTGCCGAGGGCA  
TCCTGCCACAGTCTAACCGAATCCAAGCAGTCCGCAACATCAAACACCTACAAAC  
CTTCACGAGGTGCGCAGCTTCTTGGGAGTATGTAATTACTCCCGTCAATTCATCGAA  
AACTACGCCGACTTGTCAAACCGTTGACTCACCTTCTTCAGAAAGACACCCCATTC  
GTTTGGGATGTCACTCACAACGAAGCGGTGGCTTCCTTGAAAAACCTGCTTTGCGAG  
GCACCCTGCCTGGTATACCCCAACAAAGACAAGACATTCTTTTTGGAAGTCGGTTTC  
TCAGAGCACTGCCTTAGCGCTGGGTTGTACCAAAAATACGACCAAGACAAACGTGT  
GGTTGCTTACGCGAGCAAAACACTCAACCCCGCCGAACACAAATACTCAGACTGCG  
AAAAAGCGCTGCTGTGACAGTCTGGGCGATCAAACACTTCACCAGTTATGTGCGCG  
GACAAAAGGTGATCATAGAAACATGTCACCAGCCTGTGACTTTTCTGAAAAGCCAA  
CGAATCCGTGAGGGTGCTGTACACAACAGCAGGATAGCGGCTTGGCTCATGACGCT  
GCAGAGCCATGATGTAGTAATCAACTACGCAAAGCAAAGAACCTGCCTTTGGGCA  
GTGCTTTGGCGGTGTGTCAACACTGTGGTGACGATGAAACCGACTCCGGACCACCCC  
CGCGTGACATCGCTCCGCCATTGCCTTCGAACCATCACTATTTTCAAGAGAACGTGT  
GTCTCGACATGCCGATGGCATTGTAGATGGCTGTTCTTACCGCCATCTAGACCACTT  
GCAAGCTGGGGTGGGATTGGTATGGCACAACGACATTCCGTGCAAACCACTTCAATT  
TCAGCTTGGCAACAAGACCAGCCAGTTTGCAGAAGTGGCTGGCGTGCTGATCACCT  
GCAAACAGCGGTGAAACACGAATTGGCAGAACTGGCGATCTGCACCGACTCTAACT  
ACGCGAGACTCACCTTCTTATGCCACTTGCCGTTTTGGAAACAAAAGCACATGACTA  
CTTCAAGTGGTAAAGAGGTGAAAAACAAAGAGCTCATTCTAGCTTGTGATGATCTCA  
TCACCAAACACGACATACAGGTGTATTGGAAGAAAGTCAAGGGACACTCCAAATCA  
CCTGGTCGTGACAAACTTGGCAACGACCATGCTGACAGCATGGCGAAATCTGGTGC

AATTCACGGCACCCCTTGGGTGTTTGCTGCTCGAGACGAAAAACCCACTGAGGAAG  
CTATGGTGTCTGCGGTAACGCGTAGCCATGTAGCACCACGGAAAACGTCGTCGCAC  
AAACATAATGTGTTGCTAACGCATTCATTCATGAATGGCGACCTGGTAGCAATGCAA  
CACCAAGATGAGTCCCTCGCCACTTTGATGGCATTCTGTGCGGATCCTGTCAACCAC  
CCAGTGTCCGAACCTGGCTTTGGCAGGTTACACGACTTGCGTTCGCTGTACGCAACT  
AAACAGCACCTCACACTTGTAGATGACCTATTGGTGTATGTTTCAGAAACCGACACC  
GCTCGAAGGTGGGTGGTTCCTAAAACACAGAGGGGGATAATGATAGCTCATGCCCA  
CGACGAGCCATGTGGAGGCCATAGGGGGGTCAAGGCTACATGTGAAACATTGCGAC  
AGGTGGCCCACTGGCCTCACATGGAACAAGACGTGGCACGATACGTGAGGGGGTGT  
CTAGTTTGCTGCCAGTTTCAACCCACCAAGCCACTTCACAGAGCACCCCTGCAACGC  
AAGGGTGTGTCTTACCCCTGGAGCTCGATCCAGATCGACTGGGTGCGCCCAAGTTGCC  
AGGTCTGCCAGAGGCAACAAGTACCTCCTCACAGTGACTTGCGCATTACAAAAGTG  
GGTGGAGTGCCTGCCGGCGACCAATGACACAGCGGAAACCACTGCCGTTCTTTTGT  
AAACCACGTTTTTCAGTCGTTTCGGCCTGCCAGGAGAAACCGTGGACAGCGACAGAG  
GAACCCACTTTTCGGCAGCTGTAATGACCGAACTGTGGAAGCTCCTGGGAGTCAA  
GCTAAACTCCACATCGCGTACCACCCTAGGAGCTCGGGGGGGGTAGAAAGGAGCAA  
CCAATCAATTGTCAGAATCTTGAGGAAATATGTGGCAGCCAACCACAAAGATTGGG  
ACCTCAAACCTCCATTGGTACTGATGGCAATCAGAGCCACACGCAACAGGTCTACG  
GGAATGACACCCTTTGAGATGATGACGGGCCGGCAAATGACCCTTCCACTGCATCTC  
CTGTACCAACCGGGAGATGTCGCCGCAGCCACCGCCTACACGGCTCATCAATACGT  
GACCGACTTGCGGAACCATCTCCAGACTACCTTTGCGTACGCTCAAGGACAATTGGA  
AAGAAGTGCAGAAGGTGACAAGACCTATTACGACAAAAAAGCCTCACACCAGGTGT  
TCGAGGTCGGAGATAAGGTGTGGTACTACATATACACCAAACCCGCGGGCGTCGCA  
ACAAAGTTCCCTGCCCCACTGGACGGGGCCACACGAGATTGTGGTGAAGCTATACC  
TGTAGCTTACCAGATCAAATCAGCAAAGGTGACAAAACGCCACATTAAAGTGGG  
TCCACCGGAACCAAATCAAGTTGTACACTCCCCCATGGGAATAGAAGGGGTGCTA  
GCCAGCACCGAATAG

> Loki-Str consensus sequence Smc-Gag-Pol polyprotein

LTIIIMSNPSDGFPPISPLISGPSPTERLIADLSNDANPNYA EGLKMLDFNAISEKNADIATD  
ALQNRPSGGGLVKVLSSLALNYAHQQRWTVHQYLSAQQRHEQEAGEFKVQVERTREL  
ASKAEKDKLLLAEELCVRTDKLEDLSNTYNKEREQTLDQVRILKEQLGLAKTKYDEVH  
AKLDESDELARKRGEQIDALQTVVNETTQSNNALFQKLQTKDDQLMNTMTKLEDKTAE  
LIEVADLMKDEKDQVRKLENVTSKQKEDIASLDLSLHTRDLSLQTM TDKYEAERKKGD  
TYVSKINTLNSQVDSAMQHNTTLRYHLEELQNSHALSRDNQTKQPSSHPELRERGNVD  
DRRFQPLSLGHS AHSELGPPRQHNHSLTFPLGLSAHNSPRESADAPRALGGDRLDKIVKN  
FRLFDPVPGKPNDTETFLADIEDALDGYPNATNADRLLYLLKRTSNRHVTRFIRLQEQHV  
QNDYAKLATVLKIEFSGSATRKHDSLANIRQARNEHPQAYYHRLRSAYFGMLTETG  
MEDLLPFKQLFLSNMSPNFINYLGPTAHVGLPISTLRELASTAFEASKASRAKSPDTSTFE  
LRREPSLELEGAASGYAVKEDDQRGWLPSNHHPDNHRRNNSYDERPQSNRSRRDQPS  
RHAPPPNSHKSGSHKGNKRNGKGNKVFNNDLNANRNDIEALIKDVLHRKKFEKEDKDKS  
SGLGVKSLETESAIEHAIQEDANISITPAPTRIPVQVPPVLDTS PQVLSTDLDTEVEMHEISS  
FATDDSSTIPIEDPLGHVGNLSVLEIDADYKPLRSPNPLHFVGD MTRKTNSNRPYLRTVL  
EDCVTCHALIDSGSTISLISETLLDELKRAVDPTKRWLKTEHCDTNLRGFTQATSPLTKRL  
LLKLNFEVSLSIHPVYVTSIEIERMLIGSDLIDRLVPLMDWKTNQIWSQIPMPTPLTSPHSS  
KATCHTLCNDVGPTSASDANPVN LAMSPPFVAKDNVSSSTRNLTEHVVFLCGLG DSPAD  
TYRPLIGGVCLNGTMAEDTRLATWSEKSAISLEMFNEISK TANCHPLVPKTFRFPLGTT

PQTTLTAIGVCALSIRIGTKELSHYLLVVADLPHTVYVVGADILVRLGVKLDTIHQVLWSL  
AQPQHALSFDPMASGQTIPEACKTITESAMLIPARTTEVSVRLNLAPGYRMEGTTAF  
FQPSPKLFDLGLTINGNPLLELTARSTYLLVQNLQADISIPRHTQLGTLIDYAFHDFELV  
VPVIGPLPSSLDLDGEGGTLFTCQSKAIALTPVPLDDTSAFRLDVPDSNLLIYSIVTEDD  
IASPPACEVHSCEETDDSSKGDMPSPPEDELYNVAEPYPGFHAQVIQLLSEADALVNDT  
ERHQLRELFNKHSEIWSTDSLDCGVTGIHVVRIPPTPGATPTFVRQYKIPLAAYA AVQEII  
DSLLAKRIIRECNSTYSAPVWPVLKPTGKWRLTIDYRQLNKL VPLSRWPMTQLDQELPK  
VANAKYFSTVDVANGFWTMTVDPRDQHKLAFSFSNKLFTFNRCPGFYANSPSEFNIFLH  
KAMPDAASRGTIYVDDVLMRSETWSHHLNEMDHVLTQLGTAGAKLAIMKGQWCRTK  
VNYVGLLVGAEGILPQSNRIQAVRNIKTPTNLHEVRSFLGVCNYSRQFIENYADLSKPLT  
HLLQKDTPFVWDVTHNEAVASLKNLLCEAPCLVYPNKDKTFFLEVGFSEHCLSAGLYQ  
KYDQDKRVVAYASKTLNPAEHKYS DCEKALLSTVWAIKHFTSYVGGQKVIIETCHQPV  
TFLKSQRIREGAVHNSRIA AWLMTLQSHDVVINYAKAKNLPLGSALAVCQHCGDDETD  
SGPPPRDIAPPLPSNHHYFEENVCLDMPMAFVDGCSYRHL DHLQAGVGLVWHNDIPCK  
PLQFQLGNKTSQFAEVAGVLITLQTA VKHELAE LAICTDSNYARLTFLCHLPFWKQKHM  
TTSSGKEVKNKELILACDDLITKHDIQVYWKVKGHSKSPGRDKLGNDHADSMASGA  
IHGTPWVFAARDEKPTEEMVSAVTRSHVAPRKTSSHKHNVLLTHSFMNGDLVAMQH  
QDESLATLMAFLSDPVNHPVSELALAGSHDLRSLYATKQHLTLVDDLLVYVSETDTARR  
WVVPKTQRGIMIAHAHDEPCGGHRGVKATCETLRQVAHWPHMEQDVARYVRGCLVC  
CQFQPTKPLHRAPLQRKGVSYWSSIQIDWVGPVARSARGNKYLLTVTCAFTKWVECL  
PATNDAETTA VLLLNVHFSRFLPGETVDSDRGTHFSAAVMTELWKL LGVKAKLHIA  
YHPRSSGGVERS NQSIVRILRKYVA ANHKDWDKLPLVLMAIRATRNRSTGMTPFEMM  
TGRQMTLPLHLLYQPGDVAAATAYTAHQYVTDLRNHLQTTFA YAQGLERSAEGDKT  
YYDKKASHQVFEVGDKVWYYIYTKPAGVATKFLPHWTGPHEIVV KLSPVAYQIKISKG  
RQNATLKWVHRNQIKLYTPPMGIEGVLASTE\*

> Loki-Str consensus sequence *env* gene

CTGATTATGCGTTTCTGTAGGATGGAGTTCCTTTGGATGATCCTGACACTCTGCGCCC  
TGGTCAAACCAACCCAGCAGACGTAATCACGAACGGACCCCTACGGGAATCGTT  
CTCCGCGACGATCCAGGACTCCTCATAACTA ACTGCAGAGTACACACGCAGAGGGT  
ATATGTCCGCCTAGATGCAGAGAATGTGTACCGCCAACACATTCCACCTGCGGCGCA  
TTTGAGTTGGGCGGGGCTGACTGGACCAGCCAGGCAATTAAGCACGCCCAGCTAG  
ACACTGCCCATATGTTGGCCCAACTCCAAAAGTTCACAGTAACCCAGTCAGA ACTAG  
CTGAGCCCAGGCGAGAAAACGATTCGTCGGGGCGCTACTATCGATAGGGGCAGCC  
GTAGGGTCACTATTTGCCCTAGGTACCACTGCCGTCAACGCAGTCAGTCTAGCCACA  
GTCAAGAGGAATGTTAGGGAGATTACTGAAGAGATGCCACTTATCCAGCAGCAGAT  
GAAGGCACAGGCCCTTAGGTTGCAACATGTGGGAAAGTCTCTCCAGGACACTATTCT  
GGTGGTCAACACACACGCTACTCTCCTGAACAAA ACTATCCTGTCTGTAGGAAAGCT  
AGCAGAGGTCATGAACCATGACTATGCCCATGTCCAATTGGTTCGATTGTTACTGGA  
GGATTTTCTCCGTGAAGTTAGCTCTTCTATGGACCACTTGGCCATGAATAGAATCCC  
CTCATATCTAGTGCCCTCTCAATGGTGCACGACATATTGACCTCAGCTACTTCAAC  
CACACTAAGGCCGTTACAATCACATTTGGCCTATAGTCTGGGGTCCGCCATCCCAAT  
ACACGTTGATGTTGATCGTAATGAAGTGGGTTTTCTACTGACGCTGCCGGTTGTTGA  
ACTGGAGAATATCTATAGATTGAAAACGGTCTCAATGTAGGATTTTGGCGCGACAG  
TACCACGTAAAGATTGCCACGCCCCAGTTGTAGCTTACCAGGAAAACAACCCAG  
ATTTCTATCTCACCCCTAACCTGCTAATGTGTACTCTAACCAAAGATGTCCACTACCT  
TTGTCCTAGCAAACCATTTGTCAGGGATAACACTGAGCGTCTTTGTGGTATTAAAGC

TATCACCAGCGAAGAACGCTGTAGAGCCAACTAACAGCCAGGGATGGGGCCACCA  
CCACACAAGTGGAGGTGGTAGGGAACCGATGGTTGGTCAACACACCGTTCGCGTCC  
GCCACTATGACTTACGAACGCCATGACTCCATCACCCAATTGAACCTCCCCAACAG  
ACTGTTTTTGTACGGTACCAGAGGGGGCGATTATTCACGTAGACGACCTCGCTCTA  
TACCACCTTCCCGACGACCGGATAGACACAGAGATTGAAATGCCGGACGCTTTTGT  
AAACGTTCCCTTGAGTTACCACAAGCCATTCAATACCAAATCCAGTACGAGGGACCC  
ATGACTGTCGATCTTAGCGTACTGGATGAGGCACTGTTAGTCGACCCGACTGACTAC  
AGACCAAAAGATTGGTCTGTCGCCCGCTCTTGGACGGTGCCGGACAGTATCCTGACT  
GTTACCATGATCCTTGGTCTCATTTCCTTGGCGTGTGCACCTACTACGTACACAGGC  
GCACACGTGCAATGGAAGACCTAATGAGGTCTTATACTAGGATCACCCGTGGGACG  
GAAGCGATCCCGATTTTTGGAAAGGTGGCAATGGATCCGGAAACCCTCTTACAGGG  
CCCAGTCCCAGCCTCCTCTCCCGAACTCGCTAGGTCAGCCCAGTAA

> Loki-Str consensus sequence Env protein

LIMRFCRMEFLWMILTLCALVKTNPADVITNGPPTGIVLRDDPGLLITNCRVHTQRVYVR  
LDAENVYRQHIPPAAHLSWAGADWTSQAIKHAQLDTHMLAQLQKFTVTQSELAEPRR  
EKRFV GALLSIGAAVGS L FALGTTAVNAVSLATVKRNVREITEEMPLIQQMKAQALRL  
QHV G KSLQD TILVVNTHATLLNKTILSVGKLA EVMNH DYAHVQLVRLLED FLREVSSS  
MDHLAMNRIPSYLVPLSMVHDILTSATSTTLRPLQSHLAYSLSAIPHV D VDRNEVGFL  
LTL PVVELENIYRLKTVLNVGFWRDSTHVKIATPPVVA YQENNPDFYLTPNLLMCTLTK  
DVHYLCPSKPFVRDNTERLCGIKAITSEERCRAKLTARDGATTTQVEVVGNRWLVNTPF  
ASATMTYERHDSITQLNLPNQTVFVTVPEGAIHVDLALYHLPDDRIDTEIEMPDAFAK  
RSLELPQAIQYQIQYEGPMTVDLSVLDEALLVDPTDYRPKDWSVARSWTVPDSILVTM  
ILGLISLGVCTYYVHRRTAMEDLMRSYTRITRGTEAPIFGKVAMPETLLQGPVPASSP  
ELARSAQ\*

>Loki-Tfu consensus sequence

GGCAGAAAGCCCCAGACAACATAGCTCCTAGGATCATT CAGGCATGCAAGCCCCTC  
CACCACAATAAGGTGGCGGTTCAAGGAGGGGCTATTAGCGTTGGCCACCAATATTG  
TAAGA ACTTGCATTGGCCCTTTGTCTGTGTCTCTTTTAGCCAACCGTGCCAGCATGTC  
CCGACCATCCAGCCCCGAGGCACACTGGGATCAGCTAGAGACCTGAATGAACGGCA  
TGGCGAGCACCTTCTACCGAACTACTGCTGATCTGCAACACTTGAGCCGGGAAA  
AGCTTGATGACAACCTGAGTGTGGTGTGTCTCATAACGCAGCACAGGACTATAGCC  
ACAAGGAGCTGGCCAAGATCTTCGGAGCACTGACCTACAACCTCATCGCCCAGACA  
AAAATGGAGGTAGAAATAAACTCTTGCTACAACAGGATTCGTTGTCATTACAGATC  
CAACTTGGGGAGGCTCAGAGGAACCTAGCACAGGCTCACGACCAGCTAGACCAAGT  
CCAGACAGGGACTCAGAGCCAACGAGAAACGGTAGATGAAGAGGACACAGA ACTG  
CAGGAGAAAGTAAAAGGACTACAACAGGCCATGACCGACCTCCGTGCAGACACAG  
CACGCAGAGAACAAACAGGAAAAGGACACCCAGGAGGAAAGACGAACTTGCACAAC  
TCACAGAGAACTAAAACACGCATATAGATTACAAAGGGACCCTGAAAAGGAAAGG  
CCCAACGTGGAATTTCCCTTAACCAGTGGACTCATACCCCAAAAACAAGAATCAAC  
ATTTCAAAGGGGGGTGAGAAATTCGACTCGAGACCTCCCCAGGGTGGGAGACTT  
TTCAAGAAACCCCGCGTTCCAGTCACAGGGTCGCCCCTAAGGAATTGGACAACTG  
GCTAGAAACATCCCTACTTTCACACCAGACCCTGCAGGAGGCTATGACATACATGCC  
TACCTGCAAGACATTGACTTTCATTTACAGACTGTAGCTAACATTACTACACGAGAC  
CAACTCTACCTCCTCAGGATCACCTCCAGCCGCGAAGTACGGAGCTTCTGGATCGG  
CAACCAGACAAGATCAAAGAGGATTACCAGCAGCTTCAAGAAGCCCTGATTAAGGA  
ATTCTCTGACCCAGAGTCAGAGCAAGGACTGTTCACTGCCCTGGACCTAAAACAGA

GCAGACATGAAACCACACAAGCTTATTACAACAGGCTCCGACAGGCCTACTTCGGA  
GCCCGAAATGAACCAGGAATGGAGGAGGACTTCAACTTCAAAACTTTGTTCCCTCAG  
AAACCTTCACCCTGCTGTAAGTCACCACCTGGGGGTCTGGCCTGCCACGGGAAAT  
GTCCATCCATCAGCTTCGAGACTTAGCCCCGAAAAGCCTATGCCAAGCAAAGGACTG  
TGCCCGAAAAACCTGTAAAAGGGGCAGCAATCTATTCTGTCTCCGAGCAATGTTTCAG  
AACTAGCACTAGAGGGCACCCAGCAACGCTACCATGACAAACCTGTCCAGCAGGTG  
CCACGGCGCTTTCCAATCAACAGAGAACCACAGGGTCACGGCGGCACCCGTCCCAA  
ATACCAAGCTGGATGCCCTGGGAGATCCTGNGACAGGCCACGACCACCACGCAACC  
CAAAGACGGAGCCACCTGGGAAGGATCTAACTGGCCCAAAGAGA ACTGGTACTCG  
CCAACACAAACATCAGGTTTCGACTGGAAGCAACAAAAACCCTCGCAACATGCACC  
AGATAAACCAAAACACAGACCACCAATAACACAGGACCCAGAAAACACAGAGATC  
TTGAGAATTCTAAAGGAAATCATCCAAGACAAACGCCATAAAAAGGACAAGGAGG  
ACGAATCAGATAAATTATGNCTAAGCCAGGAACCTGACCGAACACCCACAATATGT  
CCTCACAAACCAAACCATCAGAGTCCGCCGACCTCCAATACCAAATCTCCAGCCAG  
AACCCCAATATTCCAGAGAGTGCTGTTTTAATGGTCTGCCTCCCAATGAGCCACAG  
GAATCCAGTCCCGAACTGCATGCCAGTCACTACACCTGCCCCAGGCCAAGACTCCT  
AGGGAATCTGTTTGAAAGAGGAATGGCCAAAAAACTGTACCTAGCCATCACATTAG  
AGAATGAGCTGAGAGTAGAAGCTCTTGTGGACACTGGTGCAGATCTGACATTAATG  
TCGACCCA ACTCTTTTACAACTACAGGTGGAAGCTAAGCGACGGAATCGAACCCCT  
AAAACGCAAAAGTGTACATTGAATGTACAATCTTACAGCCAAAACGAAGTCAAGCT  
TGAACAGATAGCTCCATTACCTGACCATCAGGCCCATGAGTGTAGTGCACCCCGT  
GTACATCTCCCAATGGACACCTACCCCTGCTCATCGGAAAAGACCTGCTAGACTG  
GTTTGAACCCCTGCTGGATTTTAAACGGCTGAAACTCTGGGGCTCAAGTGCGAAAA  
CTCTACCACCTCGGCCACCGAGAGCATCCAAGACAGACTGCCAGGTACAGGGGTC  
ATGGACAATCACACCACCAGCCGGGAAGGCAATTTGACCCGAGAACAAGTTCAAG  
GTCGCTGCTCTGTGCGTTCCAGCTAACAAGGACTCTGACTCATACTGTCCGCAAGCC  
ATGGGAGGCCTACAGCTTGATGATATTACAACGACGGACATTATACTAGCACTATGG  
GCAGACAACTCAGCAATCAGTCTCACACTGTTCAACACCCTCAAAATAGACACAGC  
AAGCATCCCTTGGAACAAGAAGCGCACGCGATTCCCGCTGGTTCCCTGCCGACCAC  
CATGGTGAGAGCTAATGGCATTGTGTCCTGAATGTAAAGTGGAAATGGCAGGTGCA  
TGACCCATTACTTCTGATCCTGCCAGACCCACCACATGACGTCTACATTGGAGCTG  
ATATTTAATCCGTCTCAGGGCCCATGTGGATATGATCACTGAAGTAGTGTGGGCC  
CAGTTACACAACAGGCCCCACAGCCGAACAAGAGAACAAGAGACTGTANATCAGC  
GAACAAGAGACTGTAATACCTGCTTACACCAAGGGCGTTGCGGTTTCGACTCAACCTG  
AAGTGCGGTCAAGCCTTAAACCAGACGCTAGGCTTCTACCAACCGTCACCTGAGAG  
TAAGGAACTGGGACTCACCTTGGAAAGCTACACCCCTAGTTGAAATAACGTCCCGAG  
CAGTTCACATCTTATTCAATAACTGCACAGCAAAGGACATCCGGGTACCTAAAGCAT  
ACCGCCTGGGCTGGTTAGTGAGCTATGGCTTCCACGACTTCGAACTCACCTTGCCAA  
TAATCGGCCCCATCCACATGAAATGATCCAGAAAGAAAGTACAGATCAAGCCGTG  
GAGACAGCACCTTTCAAGATGATCACCATTATCTCAGTCATGCCGGCCGTCCAAGAT  
CAAGTGTGCAGAACAGAGCTAACCGATGATCACTACCTCTCTGTGTACACGGTCTCC  
ACGAGCCCCACCTGCGAGACGGACAACACCACTGCACAGCTAGTAGCACAGGAAAC  
ACACGGATTAACAACAGAAGAACCGTACCCGGGATTTGAGTCACAGGTGCAACAAA  
TCCTGAAGGATGCCGACGCCATTCAAGATGAGGGGAGACCGGCACAACTACGTCAA  
GTCTGTATAAATATAAAACATCATTTGCAAAGGACTCTTTAGACTGTGGCCTAAC  
AACCTGCATGTGATGCGTATCCCCACGCACCCACAGGCTCCGCCACCTTTGTCAA



CAATACAAGATCCCCCTTGAATCATAACGAACCTGTGCAGGAGATCATCAACTCCATG  
CTTGAAAAGGGTGTCCATCCGCTTATGCAACAGCACCTGCTCAGCCCCCATATGGCCT  
GTCCTAACACCAAACGGCAAGTGGCGACCGACCATCGACTATAGGAACTAAACCA  
ACAGGTATCATTGTACGTTGGCCCATGACCCAGCTGGAACAAGAAATACCAAGAG  
TTAAGGGAGCCACAATTTTCTCCACACTTGACGTGGCCTCAGGATTTTGGACTATAC  
CAGTGCACCCCGATGATCAACACAAGCTGGCCTTCATGTTCTGCAACCGGTANTATA  
CCTTCACAAGGTGTCCATTCGGCTATGCTAACTCGCCAGCTGAATTTAACATCTTCT  
CAACAAGGCATGCCAGATGCTAGAGTAAGGGGCAACCTCATCTACGTGGACGATG  
TCCTCATGAAAAGCACAACCATGACTGATCATCTAAAAGAAATCGACCACGTCCTA  
CAACAATAACCAAGGCTGGGGCCAAAATCGCACTCCACAAGGGACAATGGTGCAA  
AACCAAGTCAATTATGTGGGTCCGCTCATTGCACCACAGGGCATCGAACGACAAA  
CCAACCGCATCCAGGCGATTCAAACATCAAGCCACCTGCCAACATCTCAGAAGTC  
CGAAGTTTCTAGGTGTATGCAGCTATTCTCGACAGTTCATTAAGGACTACTCAGAT  
ATTGCACGCCCTCTCATGGCACTTCTAAAGAAAGATTCCCCCTTACCTGGACAGAC  
GCCAGCAAAAATGCTATGAACAACTGAAGAAACACCTGTGCACCGCTCCATGCCT  
GGCANAACCCACCCACAGAGGGAGTTCTACCTGGAGGCTGGATTCTCTAGTCACT  
GCCTGAGTGCTGGACTTTATCAGCGACATGACCAGGACAAAAGGGTGGTCGCATAC  
GCCAGCAAGACACTCTTGCCACCAGAGTGCAAATACTCAGACTGTGAGAAAGCCCT  
GCTCTGCACTGTATGGGCCATTGAGAGATTCTCTAACTATATCGGTGCCAGAAAGT  
GATCATAGAGACCTGCCACCAGCCTACCACATTTCTTAACAGCCAATGCATCCGTGA  
TGGTGTGGTCACCAATGCCCGCCTCGCCACATGGCTAATGGCCCTCCAAGGGCGCAA  
CGTGGAACACGGTATGCCCAAACCAACAAGTCAGCACTGGGCAATGGCCTGGCAG  
CATGCCAAAGCTGCTCAGACGATACACCGACTGTGACTACAGATATGGAAAGGCC  
CAACTGCAGCCACCCACCTGTCAAGTACTTTGAAGTCAACGTGNTATGCCAAGGC  
ATGCCACAGCCTACGTTGATGGATGCTCTACAACCATGAGGGTAACCTTAAAGCG  
GGTGCAGGTGTCTCTGGATGNAACCATGCCAACCACAACACTTCAGGCTGGGGCC  
CCAGTCCTCACAATATGCGGAGATAGCAGCTGTACTCATAGCCCTACAGATAGCATC  
AGCCACAACATCAGAGACCTGCTCATTTGCACAGACTCCAACATGCCAGACTTAG  
TTTCACATGCCACCTCCCAAGCTGGAAGAAAAACGGCTTCAGGACTGCAAACAACA  
AACAAGTTAAACATAAACACCTGTTCTGGCATGTGAGGACATCACAAACGAACAC  
GATATGACCATCTACTGTAAGAAGGTAAGGGCCACTCGAAGCAACCAGGCACAAA  
TAAAGATCTAAATGACCAGACAGACGCCCTCGCCAAAGCAGGCGCTTTACACGGCA  
ATTTGTGGTCACCACCAACCGGACCACACAACCCACCATCACAGCCATAACCCGC  
AGCTACCGAACTAAATCAACCACACTTCCCACCTCACAGCCACTTACGCTGACTCCA  
CAAATCTCCAAAAATGACATCGCTGACATGCAGGCATCTGATTCCACTATACAGACC  
ATCCTTCGCCACCTCTCTAGCCCCTCCGACCCCCCGGTACAGCTGTTAATCTAGCCA  
CCTCCCCATCCCTAAAACGGCTACATGATGTCAAGCCCATGCTGCGTGTGATAGACG  
GCATTTTATCGTATGCCCTGATGACCGCACCGTGCCAAAACCTTGTTGGTGGCACAGT  
GCCAAAGGGGGTTCATGTTAATGTATGCCACGACGCACCATGTGCCGGACACCAT  
GGCACAAGCCACGTATGAGACATTGAAACAAGTGGTATACTGGCCTGGCATGCA  
ACAAGATGTGACAGAGTATGTCAAAGGATGCCTTAGGTGCTGTCAATTCCAACCAG  
CAAACCCAAACTACCGAGCCCCACTGCAACGCAGAGGAGTCACATTTCCGTGGTCA  
GACCTCCAATTGACTGTGTGGGACCCCTTCCCAGATCAACAAGAGGCAACAAATA  
CTTCATCACAGTCGTGTGTCAGTTCACCAAGTGGGTGGAGTGCCTCCCAGCACCCAA  
TGACACTGCTCACACCACCGCCTATCTTCTGATGAATCATATTTTCAACCGGTTTGGG  
CTACCCTGAGAGTCAATTCCGACAGAGGCACCCATTCACGGCAGAGGTCATGCA

GCAGATTTGGAAGCTACTGGGGGTGAAAGCAAACCTTCACATCAGTCACCACCCTA  
TCTCCTCAGGTCAAGTAGAACGAACCAATCGGACGGTAGTCAGCATGTTAAGGAAA  
TACGTGGCTGCCAATCAANAAGACTGGGATGTGAAACTTCCTCTGGTGCTCATGGCC  
ATCAAGGCAACACCACAGGAGTCAACCGGCATCTCCCCTTTCGAACTAATGACTGG  
ACGGCAGATGACATTACCACTACACCTGCTATAACCAACCAGGAGACTCTAACCTTGT  
CACAGCTTATACCACCTGCCAATACCTCGAGGAACTGCACAAGCACCTGAGATCCA  
CCTTTTCATTTGCTCAACAACACCTCCAAAAGAGTGCCGAGGGTCAGAAAGCATATT  
ATGACCGTAAAGCATCGCATGAGGAACTGAACGTGGGGGATAAGGTCTGGTACTAC  
TGCTTCAACCAGCCACCTCAAACGGCCTCTAATCGGCGATCAAAGAAATTCCACATT  
GGGCAGGACCGCACGAGATTGTAGACAAACTCTCCTCGGTTGCCTACCGAATCCGA  
ATAAGCCAGGGACAGAAAGAACCGGTCCTCAAATGGGTCCATCGCAACCAGATCAA  
GAGACACAAGGCCATAAACAAGGAAAAACTGTCTGGGGCTATTGCAAACCTCGGACT  
AACTACTAATTCCACAATGGAAAACATGTCTTGACCAATCAAGAATTTCCCCACTG  
ACCTACTGTTTTTCTCCCCCTCTGTATCAGGATGCTGCTGTGGCTCTCCCTTCTGTGCC  
TCCAAATAACCAGAGGACAGCCGCAACCTGACCTCACCTCTCCGGGCCCGACATCA  
GGCATCGTATTGAAGGATCAACCGGGACTTATTACCAACTGCAGAACTCATGCCCAA  
AAGGTATATGTGCGACTCGACCCCCGAAATGTCTACCAAACGCAGTACCCACAGAC  
GGCCGCACACTACAGTTGGGCAAGGGCCCGATGGACCGAGAATGCACTTGCACATG  
CCGAGGCTGATATCAAACACATGCTCACTCAGTTATANAAGATGACTGTCACCTCAGG  
CAGAGCTAAATGGGCACAACCGAAGGAACAAACGGTTCCTGGGGGCCTTGCTGGGA  
ACCGCGGCTGCGGTGGGCACTCTTTTCAACCTAGGTCTGTCCAGTGTAACCTCTGTA  
AGCCTGTCGACTCTGAGACAGCATATGAGAGAAATCCAGACTGAGATACCCAGTT  
GAGAGAACAACCTCACACAACAAGGGCAAACCTCCAGACCATAGGCAAGTCATTAA  
AAGGCACCTTAGTGGTCTCAACACCCACAGCATCCTGATGAACCAAACCGTGAAC  
TCCATAAAACAGCTGTACTCGATCCTACAAAATGATGTGGCCCAAATCCAGCTGGTC  
ACAGCACTGATGGCCGACATGCTGCGAGAAGTGAGTTCTTCCATCGACAGCCTAGC  
CATGGGCAGGATCCCTCCATACCTGGTGCCCTTAAGCCTTGCACAAACTGCCCTGTC  
CTCCGCTACCACTCATTCAACTGATTCCCTTCAAGCCCATCTTGCATACGCACTGGG  
AGGATCCGTCCTACTTCATCGACCCAGAACAGGGTGGATGGCCTTCCCTCAAACCT  
ACCAATCATTGAATCTGACAACATCTATCGGCTCAAAGATGTGGTCAATGTCGGTTT  
TTGGAAAGGAAACACCCACATCAAGGTGCACACCCCTGAGGTGGTAGCCTACCACG  
ACAGCAATCCACAGTTATATCTGGCCCCAAACCTGCGCATGTGTACCCGCACCAAGG  
ACATTCATCTCTGCCAAGCAAGCCGTTCCGCCGAGACAACACCAAAGGAATCT  
GTGGGTTGCAACCCATGCAACAGGACACCCGCTGCCCTGCTGAAGCCAAGCCATGC  
AGCCAGGACACGCAAGCAGAAATCGTTGGAGATCGGTGGCTGGTCAACACTCCCAT  
CCGTACCGCTACATTAACCTACGACAAACATGATACTGCCACTCGCGTGAACCTTACC  
CAGCCAAAATATGTGGATTCAAGTCCCCAAGGGTGCCATCCTCCACCTCGGGGACCT  
CGCTCTATTCCACCTCCCCAGTGAAGAGTATCAATCAGAGGTGGAAATCACGGACTT  
CTTCAAATTCACAATCTCACCTGGACCCTGAATTGGAACCTGAGAATCGAGGAGG  
GGGGGAGGCAAATGATCGACATCACCCAGTCGACACGGCCCTCAAAGCATTGTCC  
CGACTACCAATCCCAGCTAACTTCCCCGTTGCCCGAGCCTGGACTGCCGCTGACACA  
GCACTCTGCATCTCCACAGTCATCGGGTATGCACTGAGCCTCGGCCTCGCCCTACTT  
CTGTTCAAACGAATCAATGGAATACAAAGATCCATGACCAGGTGTACAGCTGCTCTT  
CCCCGTGCTTTCAACCGTAACCACCGGAGAAGCGAGACCCAACCAGAATCAACGAT  
AAGTCTACCAAACCTCAACCCCATGACTGAGGAACCCAGGGCTGAGGGAAGCTAA

> Loki-Tfu consensus sequence *smc-gag* gene

TTGCATTGGCCCTTTGTCTGTGTCTCTTTTAGCCAACCGTGCCAGCATGTCCCGACCA  
TCCAGCCCCGAGGCACACTGGGATCAGCTAGAGACCTGAATGAACGGCATGGCGAG  
CACCTTCCTACCGAACTACTGCTGATCTGCAACACTTGAGCCGGGAAAAGCTTGAT  
GACAACCTGAGTGTGGTGATGTCTCATAACGCAGCACAGGACTATAGCCACAAGGA  
GCTGGCCAAGATCTTCGGAGCACTGACCTACAACCTCATCGCCAGACAAAAATGG  
AGGTAGAAATAAACTCTTGCCTACAACAGGATTCGTTGTCATTACAGATCCAACCTG  
GGGAGGCTCAGAGGAACCTAGCACAGGCTCACGACCAGCTAGACCAAGTCCAGACA  
GGGACTCAGAGCCAACGAGAAACGGTAGATGAAGAGGACACAGAAGTGCAGGAGA  
AAGTAAAAGGACTACAACAGGCCATGACCGACCTCCGTGCAGACACAGCACGCAGA  
GAACAACAGGAAAAGGACACCCAGGAGGAAAGACGAACTTGCACAACCTCACAGAG  
AACTAAAACACGCATATAGATTACAAAGGGACCCTGAAAAGGAAAGGCCCAACGTG  
GAATTTCCCTTAACCAGTGGACTCATACCCCAAAAACAAGAATCAACATTTCAAAG  
GGGGGTGAGAAATTCGACTCGAGACCTCCCAGGGTGGGAGACTTTTCAAGAAAC  
CCCGCGTTCCAGTCACAGGGTCGCCCCAAGGAATTGGACAACTGGCTAGAAACA  
TCCCTACTTTACACCAGACCCTGCAGGAGGCTATGACATACATGCCTACCTGCAAG  
ACATTGACTTTTCAATTTACAGACTGTAGCTAACATTACTACACGAGACCAACTCTACC  
TCCTCAGGATCACCTCCAGCCGCGAAGTACGGAGCTTCCTGGATCGGCAACCAGAC  
AAGATCAAAGAGGATTACCAGCAGCTTCAAGAAGCCCTGATTAAGGAATTCTCTGA  
CCAGAGTCAGAGCAAGGACTGTTCACTGCCCTGGACCTAAAACAGAGCAGACATG  
AAACCACACAAGCTTATTACAACAGGCTCCGACAGGCCTACTTCGGAGCCCAGAAAT  
GAACCAGGAATGGAGGAGGACTTCAACTTCAAACCTTTGTTCCCTCAGAAACCTTCAC  
CCTGCTGTAAGTCACCACCTGGGGGTCCCTGGCCTGCCACGGGAAATGTCCATCCAT  
CAGCTTCGAGACTTAGCCCGAAAAGCCTATGCCAAGCAAAGGACTGTGCCCGAAAA  
ACCTGTAAAAGGGGCAGCAATCTATTCTGTCTCCGAGCAATGTTTCAGAAGTACACT  
AGAGGGCACCCAGCAACGCTACCATGACAAACCTGTCCAGCAGGTGCCACGGCGCT  
TTCCAATCAACAGAGAACCACAGGGTCACGGCGGCACCCGTCCCAAATACCAAGCT  
GGATGCCCTGGGAGATCCTGNGACAGGCCACGACCACCACGCAACCCAAAAGACGG  
AGCCACCTGGGAAGGATCTAACTGGCCCAAAGAGAACTGGTACTCGCCAACACAAA  
CATCAGGTTTCGACTGGAAGCAACAAAACCCTCGCAACATGCACCAGATAAACCA  
AAACACAGACCACCAATAACACAGGACCCAGAAAACACAGAGATCTTGAGAATTCT  
AAAGGAAATCATCCAAGACAAACGCCATAAAAAGGACAAGGAGGACGAATCAGAT  
AAATTATGNCTAAGCCAGGAACCTGACCGAACACCCACAATATGTCTCACAAACC  
AAACCATCAGAGTCCGCCGACCTCCAATACCAAATCTCCAGCCAGAACCCCAATATT  
CCAGAGAGTGCTGTTTTAA

> Loki-Tfu consensus sequence Smc-Gag polyprotein

LHWPFVCSFSQPCQHVPITIQPRGTLGSARDLNERHGEHLPTETTADLQHLRSREKLDDN  
LSVVMASHNAAQDYSHKELAKIFGALTYNLIAQTKMEVEINSCLQQDSLQIQLGEAQR  
NLAQAHDQLDQVQTGTQSQRETVDEEDTELQEKVKGLQQAMTDLRADTARREQQEKD  
TQEERTCTTHRELKHAYRLQRDPEKERPNVEFPLTSGLIPPKQESTFQKGGKFRLETSP  
GWETFQETPRSSHRVAPKELDKLARNIPTFTDPAGGYDIHAYLQDIDFHLQTVANITTR  
DQLYLLRITSSREVRSLDRQPKIKEDYQQLQEALIKEFSDPESEQLFTALDLKQSRHE  
TTQAYYNRLRQAYFGARNEPMEEDFNFKTLFLRNLHPAVSHHLGVLACPREMSIHL  
RDLARKAYAKQRTVPEKPKVGAAYSVSEQCSELALEGTQQRVYHDKPVQVPRRFPINR  
EPQGHGGTRPKYQAGCPGRSXRPRPPRNPKDGTWEGSNWPKENWYSPTQTSQDFDW  
KQKPSQHAPDKPKHRPPITQDPENTEILRILKEIQQDKRHKKDKEDESDKLXLSQEPDRT  
PTICPHKPNHQSPPTSNTKSPARTPIFQRVLF\*

> Loki-Tfu consensus sequence *pol* gene

ATGAGCCACAGGAATCCAGTCCCGAACTGCATGCCAGTCACTACACCTGCCCCAGG  
CCCAAGACTCCTAGGGAATCTGTTTGAAGAGGAATGGCCAAAAAACTGTACCTAG  
CCATCACATTAGAGAATGAGCTGAGAGTAGAAGCTCTTGTGGACACTGGTGCAGAT  
CTGACATTAATGTCGACCCAACCTTTTTACAACTACAGGTGGAAGCTAAGCGACGG  
AATCGAACCCCTTAAAACGCAAAAGTGTACATTGAATGTACAATCTTACAGCCAAAA  
CGAAGTCAAGCTTGAACAGATAGCTCCCATTACCTGACCATCAGGCCCATGAGTGT  
AGTGCACCCCGTGTACATCTCCCAATGGACACCTACCCCTGCTCATCGGAAAAGA  
CCTGCTAGACTGGTTTGAACCCCTGCTGGATTTTAAACGGCTGAACTCTGGGGCTC  
AAGTGCGAAAACTCTACCACCTCGGCCACCGAGAGCATCCAAGACAGACTGCCAG  
GTCACAGGGGTCATGGACAATCACACCACCGCCGGGAAGGCAATTTGACCCGAGA  
ACAAAGTTCAAGGTCGCTGCTCTGTGCGTTCCAGCTAACAAAGGACTCTGACTCATA  
TGTCCGCAAGCCATGGGAGGCCTACAGCTTGATGATATTACAACGACGGACATTATA  
CTAGCACTATGGGCAGACAACTCAGCAATCAGTCTCACACTGTTCAACACCCTCAA  
ATAGACACAGCAAGCATCCCTTGGACCAAGAAGCGCACGCGATTCCCGCTGGTTCC  
CTGCCCGACCACCATGGTGAGAGCTAATGGCATTGTGTCCTGAATGTAAAGTGGA  
TGGCAGGTGCATGACCCATTACTTCCTGATCCTGCCAGACCCACCATGACGTCTA  
CATTGGAGCTGATATTTAATCCGTCTCAGGGCCCATGTGGATATGATCACTGAAGT  
AGTGTGGGCCCCAGTTACACAACAGGCCCCACAGCCGAACAAGAGAACAAGAGA  
CTGTANATCAGCGAACAAGAGACTGTAATACCTGCTTACACCAAGGGCGTTGCGGT  
CGACTCAACCTGAAGTGCAGTCAAGCCTTAAACCAGACGCTAGGCTTCTACCAACC  
GTCACCTGAGAGTAAGGAAGTGGGACTCACCTTGGAAAGCTACACCCCTAGTTGAAA  
TAACGTCCCGAGCAGTTCACATCTTATTCAATAACTGCACAGCAAAGGACATCCGGG  
TACCTAAAGCATAACCGCCTGGGCTGGTTAGTGAGCTATGGCTTCCACGACTTCGAAC  
TCACCTTGCCAATAATCGGCCCATCCACATGAAATGATCCCAGAAGAAAGTACA  
GATCAAGCCGTGGAGACAGCACCTTCAAGATGATCACCATTATCTCAGTCATGCCG  
GCCGTCCAAGATCAAGTGTGCAGAACAGAGCTAACCGATGATCACTACCTCTCTGTG  
TACACGGTCTCCACGAGCCCCACCTGCGAGACGGACAACACCACTGCACAGCTAGT  
AGCACAGGAAACACACGGATTAACAACAGAAGAACCGTACCCGGGATTTGAGTCAC  
AGGTGCAACAAATCCTGAAGGATGCCGACGCCATTCAAGATGAGGGAGACCGGCAC  
AACTACGTCAAGTCCCTGTATAAATATAAAACATCATTTGCAAAGGACTCTTTAGAC  
TGTGGCCTAACCAACCTGCATGTGATGCGTATCCCCACGCACCCACAGGCTCCGCCC  
ACCTTTGTCAAACAATAACAAGATCCCCCTTGAATCATAACGAACCTGTGCAGGAGATC  
ATCAACTCCATGCTTGAAAAGGGTGTGCATCCGCTTATGCAACAGCACCTGCTCAGCC  
CCCATATGGCCTGTCTAACACCAAACGGCAAGTGGCGACCGACCATCGACTATAG  
GAACTAAACCAACAGGTATCATTGTCACGTTGGCCCATGACCCAGCTGGAACAAG  
AAATACCAAGAGTTAAGGGAGCCACAATTTTCTCCACACTTGACGTGGCCTCAGGAT  
TTTGGACTATACAGTGCACCCCGATGATCAACACAAGCTGGCCTTCATGTTCTGCA  
ACCGGTANTATACCTTACAAGGTGTCCATTCGGCTATGCTAACTCGCCAGCTGAAT  
TTAACATCTTCTCAACAAGGCATGCCAGATGCTAGAGTAAGGGGCAACCTCATCT  
ACGTGGACGATGTCCTCATGAAAAGCACAACCATGACTGATCATCTAAAAGAAATC  
GACCACGTCTTACAACAATAACCAAGGCTGGGGCCAAAATCGCACTCCACAAGGG  
ACAATGGTGCAAAACCAAAGTCAATTATGTGGGTCCGCTCATTGCACCACAGGGCA  
TCGAACGACAAACCAACCGCATCCAGGCGATTCAAACATCAAGCCACCTGCCAAC  
ATCTCAGAACTCCGAAGTTTCTAGGTGTATGCAGCTATTCTCGACAGTTCATTAAG  
GACTACTCAGATATTGCACGCCCTCTCATGGCACTTCTAAAGAAAGATTCCCCCTTC

ACCTGGACAGACGCCAGCAAAATGCTATGAACAAACTGAAGAAACACCTGTGCAC  
CGCTCCATGCCTGGCANAACCCACCCACAGAGGGAGTTCTACCTGGAGGCTGGAT  
TCTCTAGTCACTGCCTGAGTGCTGGACTTTATCAGCGACATGACCAGGACAAAAGGG  
TGGTCGCATACGCCAGCAAGACTCTTGCCACCAGAGTGCAAATACTCAGACTGT  
GAGAAAGCCCTGCTCTGCACTGTATGGGCCATTGAGAGATTCTCTAACTATATCGGT  
GCCCAGAAAGTGATCATAGAGACCTGCCACCAGCCTACCACATTTCTTAACAGCCA  
ATGCATCCGTGATGGTGTGGTCACCAATGCCCGCCTCGCCACATGGCTAATGGCCCT  
CCAAGGGCGCAACGTGGAAACACGGTATGCCCAAACCACAAGTCAGCACTGGGCA  
ATGGCCTGGCAGCATGCCAAAGCTGCTCAGACGATACACCGACTGTGACTACAGAT  
ATGGAAAGGCCCAACTGCAGCCACCCACCTGTCACAAGTACTTTGAAGTCAACGT  
GNTATGCCAAGGCATGCCACAGCCTACGTTGATGGATGCTCCTACAACCATGAGG  
GTAACCTTAAAGCGGGTGCAGGTGTCCTCTGGATGNAACCATGCCAACCAACAC  
TTCAGGCTGGGGCCCCAGTCTCACAATATGCGGAGATAGCAGCTGTACTCATAGCC  
CTACAGATAGCATCAGCCACAACATCAGAGACCTGCTCATTTGCACAGACTCCAAC  
TATGCCAGACTTAGTTTCACATGCCACCTCCCAAGCTGGAAGAAAAACGGCTTCAGG  
ACTGCAAACAACAACAAGTTAAACATAAACACCTGTTCCCTGGCATGTGAGGACAT  
CACAAACGAACACGATATGACCATCTACTGTAAGAAGGTAAAAGGCCACTCGAAGC  
AACCAGGCACAAATAAAGATCTAAATGACCAGACAGACGCCCTCGCCAAAGCAGGC  
GCTTTACACGGCAATTTGTGGTCACCACCAACCGGACCACACAAACCCACCATCACA  
GCCATAACCCGCAGCTACCGAACTAAATCAACCACACTTCCCACCTCACAGCCACTT  
ACGCTGACTCCACAAATCTCCAAAAATGACATCGCTGACATGCAGGCATCTGATTCC  
ACTATACAGACCATCCTTCGCCACCTCTCTAGCCCCTCCGACCCCCCGGTCACAGCT  
GTTAATCTAGCCACCTCCCCATCCCTAAAACGGCTACATGATGTCAAGCCCATGCTG  
CGTGTGATAGACGGCATTATCGTATGCCCTGATGACCGCACCGTGCCAAAACCTT  
GTGGTGCCACAGTGCCAAAGGGGGTTCATGTTAATGTATGCCACGACGCACCATG  
TGCCGGACACCATGGCACAAAAGCCACGTATGAGACATTGAAACAAGTGGTATACT  
GGCCTGGCATGCAACAAGATGTGACAGAGTATGTCAAAGGATGCCTTAGGTGCTGT  
CAATTCCAACCAGCAAACCCAAACTACCGAGCCCCACTGCAACGCAGAGGAGTCAC  
ATTTCCGTGGTCAGACCTCCAAATTGACTGTGTGGGACCCCTTCCCAGATCAACAAG  
AGGCAACAAATACTTCATCACAGTCGTGTGTCAGTTCACCAAGTGGGTGGAGTGCCT  
CCCAGCACCCAATGACACTGCTCACACCACCGCCTATCTTCTGATGAATCATATTTT  
CAACCGGTTTGGGCTACCACTGAGAGTCAATTCGACAGAGGCACCCATTTACAGGC  
AGAGGTCATGCAGCAGATTTGGAAGCTACTGGGGGTGAAAGCAAAACTTCACATCA  
GTCACCACCCTATCTCCTCAGGTCAAGTAGAACGAACCAATCGGACGGTAGTCAGC  
ATGTTAAGGAAATACGTGGCTGCCAATCAANAAGACTGGGATGTGAAACTTCCTCT  
GGTGCTCATGGCCATCAAGGCAACACCACAGGAGTCAACCGGCATCTCCCCTTTCGA  
ACTAATGACTGGACGGCAGATGACATTACCACTACACCTGCTATACCAACCAGGAG  
ACTCTAACCTTGTACAGCTTATAACCACCTGCCAATACCTCGAGGAACTGCACAAGC  
ACCTGAGATCCACCTTTTCATTTGCTCAACAACACCTCCAAAAGAGTGCCGAGGGTC  
AGAAAGCATATTATGACCGTAAAGCATCGCATGAGGAACTGAACGTGGGGGATAAG  
GTCTGGTACTACTGCTTCAACCAGCCACCTCAAACGGCCTCTAATCGGCGATCAAAG  
AAATTCCACATTGGGCAGGACCGCACGAGATTGTAG

> Loki-Tfu consensus sequence Pol protein

MSHRNPVPCMPVTPAPGPRLLGNLFERGMAKKLYLAITLENELRVEALVDTGADLT  
LMSTQLFYKLQVEAKRRNRTLKTQKCTLNQSYSQNEVKLEQIPIHLTIRPMSVHPV  
YISPMDTYPLLIGKDLLDFEPLLDKRLKLWGSSAKNSTTSATESIQDRLPGHRHGQS

HHQPGRQFDPRTKFKVAALCVPANKDSYCPQAMGGLQLDDITTTDIILALWADNSAI  
SLTLFNTLKIDTASIPWTKKRTRFPLVPCPTTMVRANGICALNVKWNRCMTHYFLILPD  
PPHDVYIGADILIRLAHVDMITEVVWAPVTQQAPTAEQENKRLXISEQETVIPAYTKGV  
AVRLNLKCGQALNQTLGFYQSPESKELGLTLEATPLVEITSRAVHILFNNCTAKDIRVP  
KAYRLGWLVSYGFDHDFELTLPIIGPIPHEMIPEESTDQAVETAPFKMITIISVMPAVQDQV  
CRTELTDDHYLSVYTVSTSPCETDNTTAQLVAQETHGLTTEEPYPGFESQVQQILKDAD  
AIQDEGDRHKLQRVLYKYKTSFAKDSLDCGLTNLHVMRIPHTHPQAPPTFVKQYKIPLES  
YEPVQEIINSMLEKGVIRLCNSTCSAPIWPVLT PNGKWRPTIDYRKLNQVSLSRWPMTO  
LEQEIPRVKGFATIFSTLDVASGFWTIPVHPDDQHKLAFMFCNRXYTFTRCPFGYANSPAE  
FNIFLNKACPDARVRGNLIYVDDVLMKSTTMTDHLKEIDHVLQQLTKAGAKIALHKGO  
WCKTKVNYVGPLIAPQGIERQTNRIQAIQNIKPPANISELRSFLGVCSYSRQFIKDYSDIAR  
PLMALLKKDSPFTWTDAAQQNAMNKLKHLCTAPCLAXPHPQREFYLEAGFSSHCLSAG  
LYQRHDQDKRVVAYASKTLLPPECKYSDCEKALLCTVWAIQRFSNYIGAQKVIIETCHQ  
PTTFLNSQCIRDGVVTNARLATWLMALQGRNVETRYAQNHKSALGNGLAACQSCSDD  
TPTVTTDMERPQLQPPTCHKYFEVNVXCQGMPTAYVDGCSYNHEGNLKAGAGVLWM  
XPCQPQHFRLGPQSSQYAEIAAVLIALQIASAHNIRDLLICTDSNYARLSFTCHLPSWKKO  
GFRTANNKQVKHKHLFLACEDITNEHDMTIYCKKVKGHSKQPGTNKDLNDQTDALAK  
AGALHGNLWSPPTGPHKPTITAITRSYRTKSTTLPTSQPLTLTPQISKNDIADMQASDSTI  
QILRHLSSPSDPPVTAVNLATSPSLKRLHDVKPMLRVIDGILSYAPDDRTVPKLVVPQC  
QRGVMLMYAHDAPCAGHHGTKATYETLKQVVYWPGMQQDVTEYVKGCLRCCQFQP  
ANPNYRAPLQRRGVTFPWSDLQIDCVGPLRSTRGNKYFITVVCQFTKWVECLPAPNDT  
AHTTAYLLMNHIFNRFGLPLRVNSDRGTHFTAEMMQQIWKLLGVKAKLHISHHPISGQ  
VERTNRTVVSMLRKYVAANQXDWDVKLPLVLMAIKATPQESTGISPFELMTGRQMTLP  
LHLLYQPGDSNLVTAYTTCQYLEELHKHLRSTFSFAQQHLQKSAEQKAYYDRKASHE  
ELNVGDKVWYYCFNQPPQTASNRRSKKFHIGQDRTRL\*

> Loki-Tfu consensus sequence *env* gene

ATGCTGCTGTGGCTCTCCCTTCTGTGCCTCCAAATAACCAGAGGACAGCCGCAACCT  
GACCTCACCTCTCCGGGCCCCGACATCAGGCATCGTATTGAAGGATCAACCGGGACTT  
ATTACCAACTGCAGAACTCATGCCCAAAGGTATATGTGCGACTCGACCCCCGAAA  
TGTCTACCAAACGCAGTACCCACAGACGGCCGCACACTACAGTTGGGCAAGGGCCC  
GATGGACCGAGAATGCACTTGACATGCCGAGGCTGATATCAAACACATGCTCACT  
CAGTTATANAAGATGACTGTCACTCAGGCAGAGCTAAATGGGCACAACCGAAGGAA  
CAAACGGTTCCTGGGGGCCTTGCTGGGAACCGCGGCTGCGGTGGGCACTCTTTTCAA  
CCTAGGTCTGTCCAGTGTAAACTCTGTAAGCCTGTGACTCTGAGACAGCATATGAG  
AGAAATCCAGACTGAGATACCCAGTTGAGAGAACAACCTCACACAACAAGGGCAA  
ACCCTCCAGACCATAGGCAAGTCATTA AAAAGGCACCTTAGTGGTCCTCAACACCCAC  
AGCATCCTGATGAACCAAACCGTGAACCTCATAAAAACAGCTGTACTCGATCCTACA  
AAATGATGTGGCCCAAATCCAGCTGGTCACAGCACTGATGGCCGACATGCTGCGAG  
AAGTGAGTTCTTCCATCGACAGCCTAGCCATGGGCAGGATCCCTCCATACCTGGTGC  
CCTTAAGCCTTGCACAA ACTGCCCTGTCCTCCGCTACCACTCATTCAACTGATTCCCT  
TCAAGCCCATCTTGACATACGCACTGGGAGGATCCGTCCTACTTCATCGACCCAGAAC  
AGGGTGGATGGCCTTCCTCCTAAACCTACCAATCATTGAATCTGACAACATCTATCG  
GCTCAAAGATGTGGTCAATGTTCGGTTTTTGGAAAGGAAACACCCACATCAAGGTGC  
ACACCCCTGAGGTGGTAGCCTACCACGACAGCAATCCACAGTTATATCTGGCCCCAA  
ACCTGCGCATGTGTACCCGCACCAAGGACATTCATCTCTGCCCAAGCAAGCCGT  
TCCGCCGAGACAACACCAAGGAATCTGTGGGTTGCAACCCATGCAACAGGACACC

CGCTGCCCTGCTGAAGCCAAGCCATGCAGCCAGGACACGCAAGCAGAAATCGTTGG  
AGATCGGTGGCTGGTCAACACTCCCATCCGTACCGCTACATTAACCTACGACAAACA  
TGATACTGCCACTCGCGTGAACCTTACCCAGCCAAAATATGTGGATTCAAGTCCCCAA  
GGGTGCCATCCTCCACCTCGGGGACCTCGCTCTATTCCACCTCCCCAGTGAAGAGTA  
TCAATCAGAGGTGGAATCACGGACTTCTTCAAATTCACAATCTCACCCCTGGACCC  
TGAATTGGAAGTGAAGAATCGAGGAGGGGGGGAGGCAAATGATCGACATCACCCCAG  
TCGACACGGCCCTCCAAGCATTGTCCCGACTACCAATCCCAGCTAACTTCCCCGTTG  
CCCGAGCCTGGACTGCCGCTGACACAGCACTCTGCATCTCCACAGTCATCGGGTATG  
CACTGAGCCTCGGCCTCGCCCTACTTCTGTTCAAACGAATCAATGGAATACAAAGAT  
CCATGACCAGGTGTACAGCTGCTCTTCCCCGTGCTTTCAACCGTAACCACCGGAGAA  
GCGAGACCAACCAGAATCAACGATAAGTCTCACCAAATCAACCCCATGACTGAG  
GAACCCAGGGCTGAGGGAAGCTAA

> Loki-Tfu consensus sequence Env protein

MLLWLSLLCLQITRGQPQDLTSPGPTSGIVLKDQPGLITNCRTHA QKVYVRLDPRNVY  
QTQYPQTA AHYSWARARWTENALAHAEADIKHMLTQLXKMTVTQ AELNGHNRRNKR  
FLGALLGTAAAVGTLFNLGLSSVNSVSLSTLRQHMREIQTEIPQLREQLTQQGQTLQIG  
KSLKGTLVVLNTHSILMNQTVNSIKQLYSILQNDVAQIQLVTALMADMLREVSSSIDSLA  
MGRIPPYL VPLSLAQ TALSSATTHSTDSLQAHLAYALGGSVLLHRPRTGWM AFLNLPII  
ESDNIYRLKDVVNVGFWKGNTHIKVHTPEVVAYHDSNPQLYLAPNLRMCTRTKDIHYL  
CPSKPFRRDNTKGICGLQPMQDTRCPAEAKPCSQDTQAEIVGDRWL VNTPIRTATLTY  
DKHDTATRVNLPSQNMWIQVPKGAILHLGDLALFHL PSEEYQSEVEITDFFKIHNLTLDP  
ELELRIE EGGRQMIDITPVD TALQALSRLPIANFPVARAWTAADTALCISTVIGYALS LG  
LALLLFKRINGIQRS MTRCTAALPRAFNRNHRRSETQPESTISLTKL NPMTEEPRAEGS\*

>Loki-Sau consensus sequence

ATAATCAATAACGATTCCCAACAAATGGTGCCCCGTGTGAGGCGATCTTATTACCAG  
CTTTATTGCAATATTTGTGCAAAAATCCAGTTATAAATTTTTAATAAAAAAAAAATAA  
TAATAATAATATATATATATATTTTTTTTTTTTATTTATTTTTTTTTCTCTTTTTTTTAAATTTTT  
TTTTTTCCCCCTCCTCTTTTTTCAAGCTGCCAGATAAAGCCA ACTGTGGTGTGTGAAGC  
ACAATTCGTGTGCATTGTTGTTATTAGTATTGTGTTGTGTTGTTAGTGAATTAGTTTG  
TGCAACAAAGAACTTCCTGTTGCAAGATTAATCTTGAACACTTGTAGCTATTGTCC  
CAGAGGTGAACAGATCACCTCATCGACCAGTCACAGGGTCAGTACTGTGTGGGAAC  
AATCAGCCTATATACCTATTGTCCGTAGGTTGTAAGTCACAGGTACACCTCTCAC  
CTGTGCATCAACAGCAGGTTAACCCTCACACATAAGCAA ACTGACCCACAGGTAG  
CTCTTTCCTTGCTACCAGAGCGAGAATGAGCCTCAACGAAACCTGTGAGACAGGAG  
CGGAAGCTTCTAACGAGTCGACCCCGAGAGATACGGTGGCCGGACTCATGTCTCTCT  
CTCCCGAAGAGAAAAGCTATTTAGATAGTTATAGTATGGAGACATGCCAAAAGAAG  
ATTGAGGAGCTTATAAGCTACATTGATAACCTGGCGGGGAAGCCAACGCGCACAAG  
AGCTGATGTTCTGGGTCAGCTCACAATGTTGTATCAGCGTGAAAGGGAATTGCAGGA  
CAGGGAGAATTCCAAGCTTCAACTGGAGAATTCCCAGTTGCAGCTGGAGAAATCCC  
AGCTTCAGCTGGAGAGTTCCCAGCTGCAGCTGGAGAATACCCAGCTTCAGCGGGAA  
AGTTCCCAGTTGCTGCAAGGAGTTTCCCAGTTGCAGCAGGAGAAAAGGGGGTTGAC  
TGCTCCTGCACCAGCGCAAGCAGTATAGGAACAGTCAGCCAGTGAGGACTCTGAGC  
GTGATTCGGACCAACCAATGGCTGATGAGGGAATACAGACGGGGCAGGCCCATAGA  
CAAAGATTCTCAGAAACGAGCCTGACAAGGCAAGGGGGGGGGGGCAATCCGCCCA  
CAGATCGCCATTGATCTTGATTCACCAGATCACGCTGGGCCGCTGCCCGGAACCG  
CAAACCAAATAGACGAGCGCCGCCCCAGGTAACCCTCCTCAGCCACGGTTCGAGCC

ACAGCCCATCACGCTCCGACGACCCTCCAGCACCAGCCTATGGGGATAGGGGCAGA  
TATCACCAGTCCCAACCTAAAACCTTCGGGTTTGGACTCCCGCCTCACGGTGAGCCT  
TCCCTACAGTATTCCCACACTATGATTCCCATACTATGGCAGCTACAGAGACACA  
TTCTCTGATGATTCCGATGAACCTTATTCCCCTCGGGAATACAACATACGGACCCGT  
CAGATAGAGTCCCTCGCCAAGGACATCGAGCGCTTTGACCCTGGTAATAAGGACTCT  
AACGTAGACGATTATATCCGAGAACTCAAGCGTGTTCTCCTCGACCTGCCCAACCCA  
ACCACCCGAGAAAACTTAAGCTCCTCTGGAAGACCACTTCCAGAAGTGTCCATGTT  
TTCATGGAACAACCTCCCGTCCAGAGTCAGGGACCGTTTCTCTGCATCCTGCAAATCT  
TTACAGGAAGAGTACTCTCTGTACACTAACCTACCTCTTCTGCCCTATGTGCGTTTCG  
CCGTCATACAAAAGAAGCAGGAAACCCCAAAGAGTACTACCGACGCCTGAGGGCA  
GCGTACTTTCAAGGCCGTAATACACCTGGGTTAGAGGAGGAGCCTTACTTCAAATCG  
CTCTTTATCCATAACCTTCACGAGAGCATAACGCTCTCAAGTGGAAGTGCATTGTGCA  
ACGAGACAGCTCAATATGTCTGAACTCAAGAGGTACTCGATGATGGTGTGGGAGGT  
TCAAGCCCGCCCAAATCGAAAGCCCGAGAGTCAGGACATGAGAGTTCTGGGGATCC  
AAGCCTCTGATGAAGCAGATCTACAACCTGGAAGGCAATGAGGTGCCTCGACCTAGG  
TTCGCTCCCCACAGAGGACCCCAAGAACAACCGTCATTCCGGCAGAATGAACATTC  
GTCATTCCGGCCTAATGAACATTCGTCATTCCGGCCTAATGAACATTCGTCATTCCG  
GCCTAATGAACATTCGTCATTCCGACACAATGAACAACCGCATCAGGGGCTCAGAA  
GCTGGTTCAGGCCAGCACGTCAAGACTTTGCTGGCCCAAGAACCGGAGTGATCGG  
AGAACCAAGAATGGTAAGTATCAGGCGAAACCTTCTTACCAAGCCCAAAGGAGAG  
TCGCAAGCCAGACACGGACGACATGCTCCAGCAATGTGTTAGAGACGCATTGAAAC  
AATTCAAAGACGATCTTCCCTCCACAGATTCCAAAAGGGGCCAGATCACGAACCC  
CCGCCACAATGACTAGGCGTAACTGCTTCCTCCCCTACCACCAAGGTTTACCTTGTG  
GACTGGGAGAGAGGAGCAGGTAAGCCGCAAGTCTCCCCGAAAAGGCCACTCCAG  
CCCCCGCCGGGTCCCCTTTTCTCACGTTCTTGGGCGACCTTGTCGCCAAGGCAACG  
CCAAACGGATCTACACCTCGATTACGATAGGACAGTGTATCAGAAGTCTCGCCTTGC  
TCGATTCTGGATCAGAAATCAGTTTGTGAACTCTGACATGTTGAAAAGGTTGCCA  
GCGCAATGCTATCTCTTGGGAAACCTCTTCAGACCGAAGCGTGCAATCTGAACATCA  
CGTCCTACACTCAGGACAAGTCACCCGTCACTCGACGTGCGTGGGTTGACATAAACT  
TTCAAGAGATGTCACTGATACACCCTATCTATATCTGTTGCTAGATACCGAACGGC  
TGCTCATTGGCCAAGACCTTCTGGATCGTTGGCTCCGCTCATCGACTGTCACCGGG  
GACACATCTGGGCTCAGGTGGAAACACCTAAACCACTCAACCCTGGCGTCAACTCA  
TCAGGCCCTGATAGCAACATAGCTGCTATTGAACTTAGGGAAACCATGTTGACGCC  
CAAGTAGAGTCCAGTCTTGACCCCGCTCCTGCAACACAGAGAGCAGATCCCATTCTG  
CCACAAATTGGTGAACAGGGGTCGACCACCCTTAGGGAAACACAGGTCGTTCCCTCTG  
CGCACTGGAAAACCTCGGGCTCTACTTTGTACGCTCCCAAAGTCATTGGGGGAGCACA  
TCTTGATGGCACCCCGGTCCCGGATGTACTTTTGGCACTTTGGTCCGAAAAGTCCGC  
TATTGACAAGGACCTTTTTGAGGACCTGCATCAGAAAAATCCGGCACTAACCTTCGT  
GCAAAAACGACATCGTCTCCTTTCAGCAGGGACCCCTCAGACCCCTCTTAAAGCAAC  
CGGCGTATGTGCACTCCCGTACTGGTGGGAACAAAGCGACTGACGCACTACATGA  
GCGTAGTCCCCCAACTTGGTTCCCCTTTCTTCATGGGAGCCGATCTTCTTGTAGGCT  
TGGCGTGCAATTAGACACAGTCAACCAAGTCCTGTGGTCCCTGGCAGAGACAGAGG  
ACCATTTCTTGACCGGTGAACCGGAACACCTGAACTCAGGTCAAACCGTACCACATG  
CAGCTCAAGTCACTAGCGAAATTGATGTGACAATTCCAGCACAAAGCGCAGGGTTT  
CCCATCCGTCTCGTCCTTATAAAAGGACAGAACTTCCCTGGAACGCAAGCATTTTT  
CAACCCTACCTCACTTCGAGGAACTCAACCTGACTGTGTGCGGTACACACCTGCTA



GAGTTGAACAACCGATCAACTTATTTACTGGTACAGAACCTCACCCGTGCTCCGATC  
CAAATGGCGGCAGGACAGCCATTAGGGATGCTCATCGACAACCTCGTTTTATGACTTT  
GAGTTGACGGTGCCCATCATCGGTGAGCTGCCCCGTCATTGGTCCCAGCTGGTTCT  
GTACAAAATGTCTGTTCACCTTCCCGACAAAATGATCACTATTGCCCGTCACGAA  
CTCCTGCAACAGGAAGCGATCTGTGGCGCAAGGCTGGACACTGAGGGCGAGATGGT  
AGTCTATTCGCTCGTGGCCCAGTCAGAGATCACGAGCCCAACGGGCTCCAAAACCC  
AGCATTTGCCAGAGGAGGCGTACCCTGGTTTTGAGGCAGAAATCGAGCAACAACCTT  
GCGAAAGCTGACGCTTTAACAACCGAGGATCAGAGAGATGCCCTCCGGGAACCTGTT  
CCGAGAGTTCCAGGCCATCTTCTCGAGAGATTCTAATGACTGTGGAGTCACAGATCT  
CCACACGGTGCGCATCCCCACGGATCCGCAAGCGCCCCGACCTTTGTACGTCAGTA  
CAGAATCCCTTTAGCAGCGTATGAGTCCATTCAAGATATCCTGGATAAACTGCTGCA  
AAAGCAAATTATCAGGGAATGCAACTCGACTTACAACCTCGCCCATCTGGCCAGTGT  
GAAACCGACTGGTAAGTGGCGTCTCACCATTGACTACCGTCCCCTGAACAAACAGG  
TTCCGCTTTCCCGGTGGCCAATGATCCACTTGGATCAGGAGCTGGCAAAGGTTAAAG  
GAGCCTGTTTCTTCTCAACCGTTGACATAGCAAATGGTTTCTGGACCATGAAGGTGG  
ACCCCGCAGACCAGTATAAACTAGCCTTCTCATTCTGCAACCGCCAGTATACCTGGA  
ATCGTTGCCATTTGGGTACTCAAACCTCACCAGCGGAGTTCAACATTTTTCTCCACA  
AAGCAATGAGTGACGCGGCAGCGCGCGGCAACCTCATATACGTGGATGACATCCTC  
ATGAGGAGTTGTACTTTTCAAACCCACCTGGCAGAAATCCGACACGTGCTCAACCAA  
CTGACCCGAGCAGGGGCCAAACTGGCCATTGCTAAGGGCCAATGGTGCCGCACGAA  
AGTCGAGTACGTTGGCCTAACGGTAGGGGGGAGTGGAATCGAACCTCAAACCTGGGA  
GGATTCCGGGCCATTCAAGACATCAAAGCTCCAACCAATGTGTCTGAGCTGCGGAGCT  
TCCTCGGGGTCTGTAACCTATTCACGGCAATTCATTGAAGATTATGCTGAGATAGCAA  
GACCACTCACGGAGCTTCTTTGTAAAGACAAGCTATTCCAATGGGAGGAAGCTCAG  
GAGCTTTCTTTCCAACAAATGAAAAGGAACTCAGCTCAGCACCTTGCTGGCTTAC  
CCAGACAAGGACCGAGAGTTTCTCCTGGAGGCAGGTTTCTCACAAAATGCCTCAGT  
GCAGCCCTAGCTCAGAAATACGACTCTGACAAAAGAGTAGTGGCCTACGCCAGTCG  
ACCACTGAGCAGCGTAGAACTAAAGTTCTCTGACTGTGAGAAAGCCCTCCTAGCTAC  
CATCTGGGCAGTGGAACACTTTCGGAGCTATGTTGGGGGCCAGAAAGTAGTGATCG  
AGACCTGCCATCAGCCAGTCACCTTCTTGAACAGTCAGCGTCTCAGAGAAGGACGT  
GTATCTAACAGCCGCATCGCCTCCTGGATGATGGCATTACAGGGGTACGATGTGGAG  
GTGAAATACGCACAGAACCAGAAAATGGCTCTGGGACAAGGTTTGGCTGGCTGCCA  
ACACTGCGACTGCTCCGATCAGCAGAACCCCTCCCTCTTACAGTGTCTACACCAAC  
ACTGCCTTCCAATCATCATTATTATGATGAAAACATCTGCCAGGGCCTGCCAAAGGT  
CTATGTAGATGGCTGCTCGTTCCACCATGAGAGCCAACCTCAGAGCCGGTGTGCGGAGT  
CGTCTGGGACCATAAAAATGATGAACCAGATCATTATCACTTGGGTCCCTAAATTGAG  
TCAATATGCAGAAATTGCAGCGGTGCTGATTGTACTCCAACAAGCGGCCAAGCTTGA  
TGTGGTGCAGTTAGTAATCTGCTCTGACTCAAATTACGCTCGCCACAGTTTCATCTCA  
CACTTCCCCACCTGGAAAGTGAACGACATGAAGAATGCTCGAAATAAACCCGTCAA  
ACATGCCGAACCTTTTCAGGCATGTGATCTGCTGGTACAGATAAGGGGAATAATGGT  
GTACTGGAAGAAGGTCAAGGGACACTCTCAGATCCCTGGCCCTGAAAAGGACGGGA  
ATGATGAGGCGGACCGCTTGGCAAAGTTAGGTGCAGAGAAGGGTACACCGTGGGAG  
TTTCAGACCGACTGGCTCCCTACCCCCAGACAGGCGTGGTCAATGCCATCACTCGC  
AGACAAGCACGAGAGAACTAGACAACCTCTCAAACCTGATGGTCAGACACTACACCT  
GGGTCGAAAACCCGATGATATAGATCTGGTCACCATGCAGGAACATGACCCTAATC  
TTCAAATCGTTCGACAATGGGTCATAACAAGCCCTGCGAGAGGAGCTCCTGAACCC

CTCTCAGTCAGCTCCCGAGAACTGCAGGCTTTCCATCGCGATTTTCCAGACTTAAAG  
CTGGAGAAGGACTTGCTGGTATACAGCCAGGGTGGTCAAGGACCGACCCGTTGGGT  
TGTGCCACCGACCATAGGGGGGTGATGCTCTCCATGCTCACGACACCCCTATTGG  
AGGACACCGAAGCTACAAAGCCACGCTTAAAACCTCCAGCAAGTAGCCTATTGGC  
CATTTATGGCCCGCGACACAAAACCTTTATGTTTCAGGGCTGCCTGATCTGCTGTCAAT  
TCCAGCCCTCTCGACCACTTAACCGTGCCCCACTTCAGGAAAGGGGAATCACATTTC  
CTTGGTCTCACCTCCAGGTTGACTGGATAGGACCTGTCCCAAGTCCTCCCGAGGTA  
ACAAGTACCTCCTTACGGTCACCTGCTCCTTACCAAATGGGTTGAGTGCCTCCCGG  
CGCCAACGACACTGCCGTACAAACAGCGGTGCTGCTGATGAACCATGTTTTTCAGCC  
GCTGGGGCCTCCACTCTCCATTGACTCAGATAGGGGTACTCACTTCACTTCGAGCG  
TAACGACCGCGTTGTACGACATCTTGGGGGTGGAAGCCAAATTCCATATTGCGTATC  
ACCCACAGTCATCAGGTCAGGTTGAGCGCGCCAACCGTACCATTGTCAACATGCTGA  
AGAAGTATGTTGGGAGTAATGGCAAGGATTGGGACATGAAACTCCCTTTGGTGTTA  
ATGGCAATTCGGTCAACCCCTCATCGCTCTACGGGAGTCACACCATTGAGATGATG  
ACTGGCAGACAAATGACCCTGCCAATACATCTCCTGTACCATCCTGAGGATGCCAGC  
ATCGCAACCGCCTACACTGCACATCAGTACGTGGCGGACTTGCAGAACACCTTCA  
GGCTACCTTCGCCTGGGCCAGGTAACCTGGAGGCCAGCGTAAAAGGGGCAAAG  
CCTACTACGACAAAACACTACGTCCAACCGCGAGTACGAAATAGGTAACAAAGTTCTG  
TATTTTCAGGTTTCGCACAACCGACGGGGATTTGTAAAAAATTCCTTCCCCGCTGGTCG  
GGCCCCTTCGAGGTTGTTCGGTAAGCTCTCACCAGTAGCCTACCGAATAAGAGTCACG  
AAACCAAAAACAACCATCGACCTACAAATGGGTCCATGCCAACCAAAATCAAACCTTT  
CAAACCATTTACTCCCCCGGGTCAAATCACTAACCCCACTCCTGACCGGGAGACATC  
ATCTCCTGACCAAGGAAACTCAGAGGAGTGTTAGTGGCCAGAGTAGAACAGGGACA  
TGCATGCATCACACAGTTAGCATGCACTAACCCATAAAAACCCCCCAAATGCTCATT  
AGTAACAACCATCTGATCTGTTTTTCAGGATGGAACCTCGCTTGGATCCTTGGCATCAT  
CTTTGGCCTACGGGTCATCCTAGCAACTGAGATGACTGAACCAGGCCCTCCAACCTGG  
GATTGTCTACAGGAAACACCCGGGCTGCTCATCACCCATTGTGACCTCTACACCCA  
GAGATTCTATGTACGCTTAGATCCTTGGGATGTGTATCGTAAGCACATCCGCCTGCC  
TCCTAAACTGACAGAGGGGAGATTAAGTGGGGATCAAACCCACAACACCATTGAAC  
AAGCCAAACAGAGAACTATCCATGTTCTTGAGCAATTAGAAAAATTCTTAACAACCTG  
AGAGAGACCTCACTGACAAAAAGAGACCCAAACGATTCCCTGGGTGCCCTACTCGCG  
GCAGCAACTGGGATCGGGTCCTTATTCTCTATCGGCCTCTCAGCTGCCAACTCTGTC  
AGCCTCGGGGCACTACAAAGGCACATGGGTGAACTTGAGGAAGAAATGCCAGAGAT  
CCAACAGAGACTCTCCCTCCAACGTGAACAATTACAGGATCTGGGTGAAACCTCA  
AGGGTACCATAGTCACAGTAAATCTACATTCTGCCCTAATCAATAACACGGTGCATG  
CCTTAGAAACATTGTCAGAAGTAGTGAAGGAAGACATCACCTATGTGCGGGTAGTG  
AGGGACCTAATGCAGGACCTCATAAGAGAAGTCAGCTCCTCAGTCAGCAGCCTCAG  
TGCTGGTAAGATACCAACCTACCTGGTACCCTTAGACCTGGTGGAGAATATTCTCAA  
AGACGCTACTACCTCAGTTGTGCAACCTTTACAAGTACACCTGGCATAACAATCTTGG  
CAGCGCTATTCCAATTTCTGTAAACCCTCGGAACTTGAGATTGGTTTCATATTGAA  
CCTACCAATAATCGGTAAACAGAATGTGTACCAACTTAAATCTGTGTCAAACGTTGG  
ATTTTGGAGAGATAACACACACATACACCTTAGAACCCCAACAACTTGCATACCA  
CAACGATAAACCCTCACTCTACCTCGTTCCTAATCTTAGTATGTGTACCAGGACAAA  
GGACATTCACTGGGTCTGTCCAAGTAACCCCTTTATCCGCGATGTGACTAACTACCT  
CTGCGGTTTGAGGACCGATGCACCTGAGCAAAGTGCCAAGGTAGACTGTCCCTCA  
AGGATGAAGAAACAGAGACCCGAGTAGAAAGAGCGGGCAGTAGATGGCTCGTGAG

CACACCTGCCACGGAAGCCATAGTGTCATATGACCGCCATGATACAGCCACTAAGC  
TAAACCTGCCTAACCAGACAATGTTTCATAACAGTTCCTCAAGGTGCCACAGTCCACA  
TCCAAGACATAATCCTCCATCATCTCGATCCAGACAGACATGACGTAGAGATCGAG  
ATCATGGACGCCTTTGTTCGGCCAGAACCTCACCATTGAAGACGATATTCAGCAACAA  
CTCTTAGCTGAAGGCACCAAAAACAGTAAAATTCAAGGTGAGGCCAAATGGACTTAC  
ACAACAATATCTGGACAGACAGGCAGGTCCTCTTACCAGGGCGCACACCATTAGCG  
TAACCGCTATTGCGCTGCTGCTCAGTGGATGGATCATCACGGCAATAATCGCACACA  
TAATGTACAAATACATTCAAAGCTCCAGACAAAAGTACTCTGCCCTCCTAGTAC  
CCCCACGTTTCCAACAACAGATTGACACCATGCCTCTAGCCGCTCTCGGTCCTTCAG  
GAGGACCGAGGAAAGCGTACTAACCGTTTGCTAACAACCACATTTCTCTTATTTCA  
CCTATCTTTCTTTCTTTCTTTGTTTCCAATTGTGTTTTTGGTGCTTTTAAGAGAAATGC  
TGACGTGTTGTTTGTAAAAATGTTTAGATAAGCTAGGGACATTTAAGAACCTTCTGC  
CCAACTGTGCCTCTCTGTCAATGCCCAGACATTAGCCTCTGAACTGTTTTGAACTG  
AATTGAACTGAACTGAATTGTGAAACCATAATCACTCTCTCGTCTCAAGGACATGTG  
GATTATACAACTGCCCATGTTTTCGGGGCTCAAGGACAGTTAGGCCCTTGGGTTGCT  
CCGAAGGCCGTGGCCAGCACCCCGCCCTTCGGACCAAGGGGGGACTGTTGGGCCT  
CATGCCTCTATACNATAATATTGTAAAAAATAACATGTAATTATAAAC  
AGTGTTTTAAATATGGATATAAAAAAATAAACGCAGATAGTGCAAACGCAGTGT  
GGGCCTCAATGCCTCTATACCACATGCCCTCAAACAAGAGAAAAGGCCTGAAGGTT  
GAAAGCCCAAAGCCCTAACTACTAACTCCCCGCCCAACCACGGGACTCAGATA  
CAAAGTGACCATAAAAGGGCTCCCAAGTGTGGGAAAACCGCACGTCACCGCTGAAC  
CCTTGCCCAGAAGACGTCACTGGTCCCTATTGTGCTGTAGCCAGGAAGTTCCCGAGA  
TACACGGTGACGTCAACCTAGGAGATTAAGAGTTCGCACCCCGAAGTACCGGTGT  
ATTATTTCCCGACGACACGTGCGTGTCAACGTCTGCAGCTGAAAATGTCTTAAGAAA  
CACCTGAGAAACGTTTTCCCTCCCTTTTTTTTTATTGAGCTAAAGTTCAGTTCCCTCCT  
CGGTGGACGAGATAGAGACTGTTTTGGCTTCACTTTTCGTTTTGTTCGAACATTCAGTA  
TTATTTTGGATCCCGAGAGGAACGCTGCACAACCCAGCCGTTCCCTCACTACCTGCA  
GAAGGAAGAAAATAATCGTCAGAAGGGACGAGACCGTCCCTCCCTTCGTGTGCGACC  
GATCGCTGTGTTACAGCCTGCCGTCAGCTGTGAGGACGCTCCAGTCTGATCCCGCGC  
TCGCCTCCTGAAGGAGTTGGAGTATACGAGTTAGCCGGGCATCCCACGCTACCGCAT  
CCCGCGGCATCCGAAAGTAAGAGGTTCTTTGTTTGGGCAGAAACAGATAGTATATA  
GCGTGATTGTTTGTGTTTGTGAAAGGACCGCCGAGTCCGCTTATGGTTACCTGTA  
CTGTGTTTTCACTGTGTTTGATACGCTCGCTAGGAGCTCTTTCAGGCAACCCAGCCTG  
GGTAGTCTTGCTGCCGTGTGTGACCACAATACGTCGTATTCCGGCTCGATCAGCGGA  
CGGCAAACGGACCTCGATTGCTTGCCGACCACTGTTTCGATGGAGAGACGACCGCT  
GTGTACCACATGGTCGTTGGGTTGTTTCTGTGTTGTCTGCTAAGCCTCGCTTAGCTCT  
TTCCCTCTTTACTAACACACATACACACACACACACACACACACACACATACACGTTGAG  
AGACGTATACTGTTTTGGGCGATCTGTTGTAACACACCGTTAACAACCTCCGCTATAA  
CCCAAGACGTGTGCTTATCATCCCTCCTTCATTGACTATAAAGACGGACTTCTACTA  
ATTCGGAATTGTGGGTATCATCCCTGTAAATTCGACCCTCGTGTGGCCAAACCGCAC  
AGGAGATCAAAGACGGCGCAACCGCTGCCCTTGTTCAAATCTCGCGCGCACATGAA  
GTGACCACCCCTGGTCGTTACAGTCACTGCCGCCATTTTTGAATTCCAGGTACATGA  
ATCAGCACATCTGCATTCATCCCCTCGGAATTCACATTCTGCGTGACAGAGTCACA  
TCCGGTGTGTTTCTGGAATCTCGTCGGCGAGATTCCTTAGATCACGCCACTAATTTGT  
AGTCCGGTGAACGTGACTTCCCAAGTCACGTTCCGGCCATCTTTGTAGTCTTTGTTGGA  
GACTTACCTATACACACACACCCCTCACACACACATACATACTTACCTACATACGCGT

ACACCTACACACACACACACACACACACACACATACATATTTACCTACACGCGCGT  
ACACCGACACATACACACACACACATCAACACTTACCTACACAGCTACACCGACAA  
TACACACACACACAATAACACATTACCTACACACGTACTCTACACACACTTTGGTG  
CTTAATGTTTTATCTCACTGTCCAATAAGTTAAAGGAAAGTTGTTTGGTTAAAGGTG  
ATGCAAGATTGTTTGTGGGACAGACTTTAATACATTTGACTATTGAAATTTGCATCT  
GTGAATTATTTGTAATAATTCATGTATTGTAATAACTGTGGCTTGAGATGTCATGCT  
CGATTCAGCATCTCTCACT

> Loki-Sau consensus sequence *gag* gene

CTGCCCAACCCAACCACCCGAGAAAACTTAAGCTCCTCTGGAAGACCACTTCCAG  
AAGTGTCCATGTTTTTCATGGAACAACCTCCCGTCCAGAGTCAGGGACCGTTTCTCTGC  
ATCCTGCAAATCTTTACAGGAAGAGTACTCTCTGTACACTAACCTACCTCTTCTGCC  
CTATGTGCGTTCGCCGTCATACAAAAGAAGCAGGAAACCCCAAAGAGTACTACCG  
ACGCCTGAGGGCAGCGTACTTTCAAGGCCGTAATACACCTGGGTTAGAGGAGGAGC  
CTTACTTCAAATCGCTCTTTATCCATAACCTTCACGAGAGCATAACGCTCTCAAGTGG  
AACTGCATTGTGGAACGAGACAGCTCAATATGTCTGAACTCAAGAGGTACTCGATG  
ATGGTGTGGGAGGTTCAAGCCCGCCCAAATCGAAAGCCCGAGAGTCAGGACATGAG  
AGTTCTGGGGATCCAAGCCTCTGATGAAGCAGATCTACAACCTGGAAGGCAATGAGG  
TGCCTCGACCTAGGTTTCGCTCCCCACAGAGGACCCCAAGAACACCGTCATTCCGGC  
AGAATGAACATTCGTCATTCCGGCCTAATGAACATTCGTCATTCCGGCCTAATGAAC  
ATTCGTCATTCCGGCCTAATGAACATTCGTCATTCCGACACAATGAACAACCGCATC  
AGGGGCTCAGAAGCTGGTTCAGGCCAGCACGTCAAGACTTTGCTGGCCCAAGAAC  
CGGAGTGATCGGAGAACCAAGAATGGTAAGTATCAGGCGAAACCTTCTTACCAAGC  
CCAAAAGGAGAGTCGCAAGCCAGACACGGACGACATGCTCCAGCAATGTGTTAGAG  
ACGCATTGAAACAATTCAAAGACGATCTTCTCCACAGATTCCAAAAAGGGGCCA  
GATCACGAACCCCGCCACAATGA

> Loki-Sau consensus sequence Gag protein

LPNPTTREKLKLLWKTTSRVHVFMELPSRVRDRFSASCKSLQEEYSLYTNPTSSALCA  
FAVIQKKQETPKEYRRLRAAYFQGRNTPGLEEPEYFKSLFIHNLHESIRSQVELHCRTR  
QLNMSELKRYSMVMWEVQARPNRPESQDMRVLGIQASDEADLQLEGNEVPRPRFAP  
HRGPPEQPSFRQNEHSSFRPNEHSSFRPNEHSSFRPNEHSSFRHNEQPHQLRSWFRPAR  
QDFAGPKNRSDRRTKNGKYQAKPSYQAQKESRKPDTDDMLQQCVRDALKQFKDDLPP  
TDSKKGPDHEPPPQ\*

> Loki-Sau consensus sequence *pol* gene

TTGGGCGACCTTGTCCGCCAAGGCAACGCCAAACGGATCTACACCTCGATTACGATA  
GGACAGTGTATCAGAACTCTCGCCTTGCTCGATTCTGGATCAGAAATCAGTTTGATG  
AACTCTGACATGTTGAAAAGGTTGCCAGCGCAATGCTATCTCTTGGGAAACCTCTT  
CAGACCGAAGCGTGCAATCTGAACATCACGTCTACACTCAGGACAAGTCACCCGT  
CACTCGACGTGCGTGGGTTGACATAAACTTTCAAGAGATGTCACTGATACACCCTAT  
CTATATCTGTTCGCTAGATAACCGAACGGCTGCTCATTGGCCAAGACCTTCTGGATCG  
CTTGGCTCCGCTCATCGACTGTCACCGGGGACACATCTGGGCTCAGGTGGAAACACC  
TAAACCACTCAACCCTGGCGTCAACTCATCAGGCCCTGATAGCAACATAGCTGCTAT  
TGAACCTAGGGAAACCATGTTGACGCCCCAAGTAGAGTCCAGTCTTGACCCCGCTCC  
TGCAACACAGAGAGCAGATCCCATTCTGCCACAAATTGGTGAACAGGGGTGACCA  
CCCTTAGGGAAACACAGGTCGTTCTCTGCGCACTGGAAAACCTCGGGCTCTACTTTGT  
ACGCTCCCAAAGTCATTGGGGGAGCACATCTTGATGGCACCCCGGTCCCGGATGTAC  
TTTTGGCACTTTGGTCCGAAAAGTCCGCTATTGACAAGGACCTTTTTGAGGACCTGC

ATCAGAAAAATCCGGCACTAACCTTCGTGCAAAAACGACATCGTCTCCTTTCAGCAG  
GGACCCCTCAGACCCCTCTTAAAGCAACCGGCGTATGTGCACTCCCGGTACTGGTGG  
GAACAAAGCGACTGACGCACTACATGAGCGTAGTCCCCAACTTGGTTCCCCTTCT  
TCATGGGAGCCGATCTTCTTGTTAGGCTTGGCGTGCAATTAGACACAGTCAACCAAG  
TCCTGTGGTCCCTGGCAGAGACAGAGGACCAATTTCTTGACCGGTGAACCGGAACAC  
CTGAACTCAGGTCAAACCGTACCACATGCAGCTCAAGTCACTAGCGAAATTGATGTG  
ACAATTCCAGCACAAAGCGCAGGGTTTCCCATCCGTCTCGTCCTTATAAAAAGGACAG  
AACTTCTTGGAACGCAAGCATTTTTTCCAACCCCTACCTCACTTCGAGGAACTCAAC  
CTGACTGTGTGCGGTACACACCTGCTAGAGTTGAACAACCGATCAACTTATTTACTG  
GTACAGAACCTCACCCGTGCTCCGATCCAAATGGCGGCAGGACAGCCATTAGGGAT  
GCTCATCGAACTCGTTTTATGACTTTGAGTTGACGGTGCCCATCATCGGTGAGCT  
GCCCCCGTCATTGGTCCCAGCTGGTTCTGTACAAAATGTCCTGTTCACCTTCCCGACA  
AAAATGATCACTATTGCCCGTCACGAACTCCTGCAACAGGAAGCGATCTGTGGCGC  
AAGGCTGGACACTGAGGGCGAGATGGTAGTCTATTCGCTCGTGGCCCAGTCAGAGA  
TCACGAGCCCAACGGGCTCCAAAACCCAGCATTGTCAGAGGAGGGCGTACCCTGGT  
TTTGAGGCAGAAATCGAGCAACAACCTTGCGAAAGCTGACGCTTTAACAACCGAGGA  
TCAGAGAGATGCCCTCCGGGAACTGTTCCGAGAGTTCCAGGCCATCTTCTCGAGAGA  
TTCTAATGACTGTGGAGTCACAGATCTCCACACGGTGGCGCATCCCCACGGATCCGCA  
AGCGCCCCCGACCTTTGTACGTCAAGTACAGAATCCCTTTAGCAGCGTATGAGTCCAT  
TCAAGATATCCTGGATAAACTGCTGCAAAAAGCAAATTATCAGGGAATGCAACTCGA  
CTTACAACCTCGCCCATCTGGCCAGTGTTGAAACCGACTGGTAAGTGGCGTCTACCA  
TTGACTACCGTCCCCTGAACAAACAGGTTCCGCTTTCCCGGTGGCCAATGATCCACT  
TGATCAGGAGCTGGCAAAGGTTAAAGGAGCCTGTTTCTTCTCAACCGTTGACATAG  
CAAATGGTTTCTGGACCATGAAGGTGGACCCCGCAGACCAGTATAAACTAGCCTTCT  
CATTCTGCAACCGCCAGTATACCTGGAATCGTTGCCATTTGGGTACTCAAACCTCAC  
CAGCGGAGTTCAACATTTTTTCTCCACAAAGCAATGAGTGACGCGGCAGCGCGCGGC  
AACCTCATATACGTGGATGACATCCTCATGAGGAGTTGACTTTTGAAACCCACCTG  
GCAGAAATCCGACACGTGCTCAACCAACTGACCCGAGCAGGGGCCAAACTGGCCAT  
TGCTAAGGGCCAATGGTGCCGCACGAAAGTCGAGTACGTTGGCCTAACGGTAGGGG  
GGAGTGGAATCGAACCTCAAACCTGGGAGGATTCGGGCCATTCAAGACATCAAAGCT  
CCAACCAATGTGTCTGAGCTGCGGAGCTTCTCGGGGTCTGTAACCTATTCACGGCAA  
TTCATTGAAGATTATGCTGAGATAGCAAGACCACTCACGGAGCTTCTTTGTAAAGAC  
AAGCTATTCCAATGGGAGGAAGCTCAGGAGCTTTCTTTCCAACAAATGAAAAGGAA  
ACTCAGCTCAGCACCTTGCCTGGCTTACCCAGACAAGGACCGAGAGTTTCTCCTGGA  
GGCAGGTTTCTCACAAAATGCCTCAGTGCAGCCCTAGCTCAGAAATACGACTCTGA  
CAAAAGAGTAGTGGCCTACGCCAGTCGACCACTGAGCAGCGTAGAACTAAAGTTCT  
CTGACTGTGAGAAAGCCCTCCTAGCTACCATCTGGGCAGTGGAACACTTTCGGAGCT  
ATGTTGGGGGCCAGAAAGTAGTGATCGAGACCTGCCATCAGCCAGTCACCTTCTTGA  
ACAGTCAGCGTCTCAGAGAAGGACGTGTATCTAACAGCCGCATCGCCTCCTGGATG  
ATGGCATTACAGGGGTACGATGTGGAGGTGAAATACGCACAGAACCAGAAAATGGC  
TCTGGGACAAGGTTTGGCTGGCTGCCAACACTGCGACTGCTCCGATCAGCAGAACCC  
CCTCCCTCTTACAGTGTCTACACCAACACTGCCTTCCAATCATCATTATTATGATGAA  
AACATCTGCCAGGGCCTGCCAAAGGTCTATGTAGATGGCTGCTCGTTCACCATGAG  
AGCCAACCTCAGAGCCGGTGTCCGAGTCGTCTGGGACCATAAAAATGATGAACCAGA  
TCATTATCACTTGGGTCCAAATTGAGTCAATATGCAGAAATTGCAGCGGTGCTGAT  
TGACTCCAACAAGCGGCCAAGCTTGATGTGGTGCAGTTAGTAATCTGCTCTGACTC

AAATTACGCTCGCCACAGTTTCATCTCACACTTCCCCACCTGGAAAGTGAACGACAT  
GAAGAATGCTCGAAATAAACCCGTCAAACATGCCGAACCTTTTCAGGCATGTGATCT  
GCTGGTCACAGATAAAGGAATAATGGTGTACTGGAAGAAGGTCAAGGGACACTCTC  
AGATCCCTGGCCCTGAAAAGGACGGGAATGATGAGGCGGACCGCTTGGCAAAGTTA  
GGTGCAGAGAAGGGTACACCGTGGGAGTTTCAGACCGACTGGCTCCCTACCCCCA  
GACAGGCGTGGTCAATGCCATCACTCGCAGACAAGCACGAGAGAACTAGACAAC  
CTCAAACCTGATGGTCAGACACTACACCTGGGTCGAAAACCCGATGATATAGATCTG  
GTCACCATGCAGGAACATGACCCTAATCTTCAAATCGTTTCGACAATGGGTCATAACA  
AGCCCTGCGAGAGGAGCTCCTGAACCCCTCTCAGTCAGCTCCCGAGAACTGCAGGC  
TTTCATCGCGATTTTCCAGACTTAAAGCTGGAGAAGGACTTGCTGGTATACAGCCA  
GGGTGGTCAAGGACCGACCCGTTGGGTTGTGCCACCGACCATAGGGGGGTGATGC  
TCTCCATGCTCACGACACCCCTATTGGAGGACACCGAAGCTACAAAGCCACGCTTA  
AAACCCTCCAGCAAGTAGCCTATTGGCCATTTATGGCCC GCGACACAAAACCTTTATG  
TTCAGGGCTGCCTGATCTGCTGTCAATTCAGCCCTCTCGACCACTTAACCGTGCCCC  
ACTTCAGGAAAGGGGAATCACATTTCTTGGTCTCACCTCCAGGTTGACTGGATAGG  
ACCTGTCCCCAAGTCCTCCCGAGGTAACAAGTACCTCCTTACGGTCACCTGCTCCTT  
CACCAAATGGGTTGAGTGCCTCCCGGCGCCCAACGACACTGCCGTCACAACAGCGG  
TGCTGCTGATGAACCATGTTTTAGCCGCTGGGGCCTCCCACTCTCCATTGACTCAG  
ATAGGGGTACTCACTTCACTTCGAGCGTAACGACCGCGTTGTACGACATCTTGGGGG  
TGGAAGCCAAATTCATATTGCGTATCACCCACAGTCATCAGGTCAGGTTGAGCGCG  
CCAACCGTACCATTGTCAACATGCTGAAGAAGTATGTTGGGAGTAATGGCAAGGAT  
TGGGACATGAAACTCCCTTTGGTGTAAATGGCAATTCGGTCAACCCCTCATCGCTCT  
ACGGGAGTCACACCATTGAGATGATGACTGGCAGACAAATGACCCTGCCAATACA  
TCTCCTGTACCATCCTGAGGATGCCAGCATCGCAACCGCCTACACTGCACATCAGTA  
CGTGGCGGACTTGCGAGAACACCTTCAGGCTACCTTCGCTGGGCCAGGTAACCT  
GGAGGCCAGCGTAAAAGGGGCAAAGCCTACTACGACAAAACCTACGTCCAACCGC  
GAGTACGAAATAGGTAACAAAGTTCTGTATTTTCAGGTTTCGACAACCGACGGGGAT  
TTGTAAAAAATTCCTTCCCCGCTGGTTCGGGCCCTTCGAGGTTGTCGGTAAGCTCTC  
ACCAGTAGCCTACCGAATAAGAGTACGAAACCAAAAACAACCATCGACCTACAAAT  
GGGTCCATGCCAACCAAATCAAACCTTTCAAACCATTTACTCCCCGGGTCAAATCA  
CTAACCCCACTCCTGACCGGGAGACATCATCTCCTGACCAAGGAAACTCAGAGGAG  
TGTTAG

> Loki-Sau consensus sequence Pol protein

LGDLVRQGNAKRIYTSITIGQCIRTLALLDSGSEISLMNSDMFEKVASAMLSLGKPLQTE  
ACNLNITSYTQDKSPVTRRAWVDINFQEMSLIHPIYICSLDTERLLIGQDLLDRLAPLIDC  
HRGHIWAQVETPKPLNPGVNSSGPDSNIAAIELRETMLTPQVESSLDPAPATQRADPILPQ  
IGEQQSTTLREHRSFLCALENSGSTLYAPKVI GGAHL DGT PVPD VLLALWSEKSAIDKDL  
FEDLHQKNPALTFVQKRHRLLSAGTPQTPLKATGVCALPVLVGTKRLTHYMSVVPQLG  
SPFFMGADLLVRLGVQLDTV NQVLWSLAETEDHFLTGEPEHLNSGQTVPHAAQVTSEID  
VTIPAQSAGFP IRLVLIKGQKLPGTQAFFQPLPHFEELNLTVCGTHLLELNRRSTYLLVQN  
LTRAPIQMAAGQPLGMLIDNSFYDFELTVPIIGELPPSLVPAGSVQNVLFTFPTKMITIARH  
ELLQQEAICGARLDTEGEMVVYSLVAQSEITSPTGSKTQHLPEEA YPGFEAEIEQQLAKA  
DALTTEDQRDALRELFREFQAIFSRDSNDCGVTDLHTVRIPTDPQAPPTFVRQYRIPLAA  
YESIQDILDKLLQKQIIRECNSTYNSPIWPVLKPTGKWRLTIDYRPLNKQVPLSRWPMIHL  
DQELAKVKGACFFSTVDIANGFWTMKVDPADQYKLAFSFCNRQYTWNRCPFGYSNSP  
AEFNIFLHKAMSDAAARGNLIYVDDILMRSCTFETHLAEIRHVLNQLTRAGAKLAIKAG

QWCRTKVEYVGLTVGGSGIEPQTGRIRAIQDIKAPTNVSELRSFLGVCNYSRQFIEDYAEI  
ARPLTELLCKDKLFQWEEAQELSFQOMKRKLSSAPCLAYPKDREFLLEAGFSQKCLSA  
ALAQKYDSDKRVVAYASRPLSSVELKFSKDCEKALLATIWAWEHFRSYVGGQKVVIETC  
HQPVTFLNSQRLREGRVSNRSRIASWMMALQGYDVEVKYAQNQKMALGQGLAGCQHC  
DCSDQQNPLPLTVSTPTLPSNHYYDENICQGLPKVYVDGCSFHESQLRAGVGVVWD  
HKNDEPDHYHLGPKLSQYAEIAAVLIVLQQA AKLDVVQLVICSDSNYARHSFISHFPTW  
KVNDMKNARNKPKVHAE L FQACDLLVTDK GIMVYWKVKGHSQIPGPEKDGND EAD  
RLAKLGAEKGTPEWFQTDWLPTPQTGVVNAITRRQAREKLDNSQTDGQTLHLGRKPDD  
IDLVTMQEHDPNLQIVRQWVITSPARGAPEPLSVSSRELQAFHRDFPDLKLEKDLLVYSQ  
GGQGPTRWVPTDHRGVMLSHAHDTPIGGHRYSYKATLKTLOQVAYWPFMARDTKLY  
VQGCLICCFQPSRPLNRAPLQERGITFPWSHLQVDWIGPVPKSSRGNKYLLTVTCSFTK  
WVECLPAPNDTAVTTAVLLMNHVFSRWGLPLSIDS DRGTHFTSSVTTALYDILGVEAKF  
HIA YHPQSSGQVERANRTIVNMLKKYVGSNGKDWDMLPLVLM AIRSTPHRSTGVT PF  
EMMTGRQMTLPIHLLYHPEDASIA TAYTAHQYVADLREHLQATFAWAQVNLEASVKG  
AKAYYDKTTSNREYEIGNKVL YFRFAQPTGICKKFLPRWSGPFEVVGKLSPVAYRIRVT  
KPKQPSTYK WVHANQIKL FKPFTPPGQITNPTPDRETSSPDQGNSEEC\*

> Loki-Sau consensus sequence *env* gene

ATGGA ACTCGCTTGGATCCTTGGCATCATCTTTGGCCTACGGGTCATCCTAGCAACT  
GAGATGACTGAACCAGGCCCTCCA ACTGGGATTGTCCTACAGGAAACACCCGGGCT  
GTCATCACCCATTGTGACCTCTACACCCAGAGATTCTATGTACGCTTAGATCCTTGG  
GATGTGTATCGTAAGCACATCCGCCTGCCTCCTAAACTGACAGAGGGGAGATTAAGT  
GGGGATCAAACCCACAACACCATTGAACAAGCCAAACAGAGA ACTATCCATGTTCT  
TGAGCAATTAGAAAAATTCTTAACA ACTGAGAGAGACCTCACTGACAAAAAGAGAC  
CCAAACGATTCTGGGTGCCCTACTCGCGGCAGCAACTGGGATCGGGTCCTTATTCT  
CTATCGGCCTCTCAGCTGCCAACTCTGTCAGCCTCGGGGCACTACAAAGGCACATGG  
GTGAACTTGAGGAAGAAATGCCAGAGATCCAACAGAGACTCTCCCTCCAACGTGAA  
CAATTACAGGATCTGGGTGAAACCCTCAAGGGTACCATAGTCACAGTAAATCTACAT  
TCTGCCCTAATCAATAACACGGTGCATGCCTTAGAAACATTGTCAGAAGTAGTGAAG  
GAAGACATCACCTATGTGCGGGTAGTGAGGGACCTAATGCAGGACCTCATAAGAGA  
AGTCAGCTCCTCAGTCAGCAGCCTCAGTGCTGGTAAGATACCAACCTACCTGGTACC  
CTTAGACCTGGTGGAGAATATTCTCAAAGACGCTACTACCTCAGTTGTGCAACCTTT  
ACAAGTACACCTGGCATAACAATCTTGGCAGCGCTATTCCAATTTCTGTAAACCCTCG  
GAACTTGAGATTGGTTTCATATTGAACCTACCAATAATCGGTAAACAGAATGTGTA  
CCA ACTTAAATCTGTGTCAAACGTTGGATTTTGGAGAGATAACACACACATAACCT  
TAGAACCCCAACAACTTGCATAACCACAACGATAACCCCTCACTCTACCTCGTTCC  
TAATCTTAGTATGTGTACCAGGACAAAGGACATTCACTGGGTCTGTCCAAGTAACCC  
CTTTATCCGCGATGTGACTA ACTACCTCTGCGGTTTGAGGACCGATGCACCTGAGCA  
AAAGTGCCAAGGTAGACTGTCCCTCAAGGATGAAGAAACAGAGACCCGAGTAGAA  
AGAGCGGGCAGTAGATGGCTCGTGAGCACACCTGCCACGGAAGCCATAGTGTCATA  
TGACCGCCATGATACAGCCACTAAGCTAAACCTGCCTAACCAGACAATGTTTCATAAC  
AGTTCTCAAGGTGCCACAGTCCACATCCAAGACATAATCCTCCATCATCTCGATCC  
AGACAGACATGACGTAGAGATCGAGATCATGGACGCCTTTGTGCGGCCAGAACCTCA  
CCATTGAAGACGATATTCAGCAACA ACTCTTAGCTGAAGGCACCAAAAACAGTAAAA  
TTCAAGGTGAGGCCAAATGGACTTACAACAACAATATCTGGACAGACAGGCAGGTC  
CTCTTACCAGGCGCACACCATTAGCGTAACCGCTATTGCGCTGCTGCTCAGTGGATG  
GATCATCACGGCAATAATCGCACACATAATGTACAAATACATTCAA AAGCTCCAGA

CAAAACTAGACTCTGCCCTCCTAGTACCCCCACGTTTCCAACAACAGATTGACACCA  
TGCTCTAGCCGCTCTCGGTCTTCAGGAGACCGAGGAAAGCGTACTAA

>Loki-Sau consensus sequence Env protein

MELAWILGIIFGLRVILATEMTEPGPPTGIVLQETPGLLITHCDLYTQRFYVRLDPWDVYR  
KHIRLPPKLTEGRLSGDQTHNTIEQAKQRTIHVLEQLEKFLTTERDLTDKKRPKRFLGAL  
LAAATGIGSLFSIGLSAANSVSLGALQRHMGELEEEMPEIQQRSLQREQLQDLGETLKG  
TIVTVNLHSALINNTVHALETLESEVVKEDITYVRVVRDLMQDLIREVSSSVSSLSAGKIPT  
YLVPLDLVENILKDATTSSVQPLQVHLAYNLGSAIPISVNPRNLEIGFILNLPPIGKQNVYQ  
LKSVSNVGFWRDNTHIHLRTPPTLAYHNDNPSLYLVPNLSMCTRTRTKDIHWVCPSNPFIR  
DVTNYLCGLRTDAPEQKQCQGRSLKDEETETRVERAGSRWL VSTPATEAIVSYDRHDTA  
TKLNLPNQTMFITVPQGATVHIQDIIHLDPDRHDVEIEIMDAFVGGQNLTIEDDIQQQLL  
AEGTKTVKFKVRPNGLTTTISGQTGRSSYQAHTISVTAIALLLSGWIITAIHIMYKYIQK  
LQTKLDSALLVPPRFQQQIDTMPLAALGPSGGPRKAY\*

>Loki-Rca consensus sequence

GTTGTGAATTCATGAAGAAATACATTTTATATTTACTGGCAGAAATATGAGAGTTGC  
TTAGGCCTCAAAAAGTAGATGAAGTGTGATGTTGCAATAATTGAAGTGTGCCCTTT  
TGGAGACCTTTAGGACAAAATAGATGTTCTCATGTTTTTACAAAGTTTTATRCATCAT  
CCAATATTGAAGACTTTTACAAGCATGTATTGTGAGGAAAACCTCGATGGAACAATG  
GCTGCTCTCGTCACAAAACAAGGAGATATTTACATGGTATTAGTGAATAAACAAAA  
ACTACCCTTACAGCCATAGGAAACAAGGTTATACAGACTATTCTCACATAGAAATAA  
CCTCACCTGGCCTAAACCTATTGTGTTCAAGTGAGGGACTGTTTAAATAGCTAACAC  
CTTGGCTAACAAAACCCATTGTGTGAATTTTTAGGAACTGTTTAGACAAAACAAGTCA  
TTCTAAACATCCAGTGGGAATGTTCAATTCAACACATGGTGGGAAAGAGTTGAATTT  
TGTGCCAGTCAAAAATATTTTAAAAGTATCTATAAGGTTATTATAAGTCATTTCAA  
CTATCTATGACATTGTAGGTCACAGAGACATATTATAATTTTGGCATCTGCGGACCC  
ACAACCTTTGGTATGAAGAAAATATATATGAAAGTGTGATTTTATAAGTAGAAGTGT  
TTTAAGAACTAATTAGTATTAGGAAAAACATATAATTATGATTATAACTATATAAG  
ACTGTAGCCTATGCTTAGATAAACAAATATTCATTGGAGATACCAGAATTATACAGG  
TATCCATATAGATAATCATTTTTATGTAGTATTGATTAATATATATAACAACGTGTGT  
ATTTCATAGATAGACCAGTTTTTATAGATATACATTTATAGAGATACATATATATAA  
CCAAGTTATGTAATAGTGATTAATCAAATTATACTGAGTGTATTTTACATTAGACC  
GATTACCAGAATATTTAAAGGTATATACTATCCTTACCATTATACACATTATGAAA  
TAGAACGTATTAACCTAAAAGGATAGACTCAAACACATGTGAGACACCTGGTGGT  
TGAAGGTGGTATTATTTGAACTCACTAAATTTCCAGAAAAGGTTAATAATTAAGTCT  
CTTAACCAATGGAAAGTGAGCCACACCTTTTGGGCTGAACTTATGATAATTTTATGA  
GCTTATTGTCCCAAATTGGGATAAAAGGCTGAGAGGGCCAAAAGGAAGGGATCACA  
GACCCACACCAGATGCACCCCTGACATCAAGAAGTCTGTTGATATTTAACCCTCC  
CCATCCTGCTGGACTTTATGACGGAAGCCATTTGATGTGCTTAGATTTTGGCGGAAA  
TCTTCCCTTTAAGCTGATTGGTAAGATACAGACCACACAAATTTTATTTAATTTCTG  
TCCTTAAAATGGTAGGGATTATATTTTAGAGGTTAAGTATTGATGTTTATTGACTGTC  
TGGGGTGTATTATTATAACCGTGTTTTAGGGAATTCAAGCCAATTTTACATCAATTT  
AAATTTCTGTGACCCAGGGAAAGTTTTATTACTCCATTTAATTTCTTAGCTCTGTTGG  
TTTAATAAGTAATTCAAATGGGCAATATTGTTCTGTTGACTCGGTGAGATATACTTTG  
GATTTCTTCCGGCCGGAGAGATTTGAAGGACTGCTCCCTGAGCAACAAGGGATATT  
GCGTTCTTGAATATAAAGGGTAAATTTCCACCCATATTTTCCAACAGACCAATTTTG  
ACTCCCTGGGTGATTATAWTAATTTTCCCTCACTACAATWCTGATGTTTTGATAATG



TATGTGTGAAGTCTCAATCACCAGAAAATTTAGTTCTGTATGAAATTGTATGAATAT  
ACTCGCTAATTAATAAAGTCAAATTATTTACYTATTAAGTTTGTGGGAGATATTTtA  
TACTTTGGTATGAAAACCCCATAAATCAACAAACTCAGGAAAGAATTGTGGTGTGC  
ACTGAcAGTAGGAACCAAATTTAGAAAATTACCGTAAGGTTGGAGGCACTGAAAAT  
AACACTGAGATCTTAATTAAGATTCCATACCACACTCACAAATAAAAATTGGAGGCA  
CTGCTGAGATATTTTGTAAAGAGGGAATCTTACCACATTACAGAACATACTGGTGATT  
GTGTTTGCATATACATTTGAAAAATATCGGTTGTATATTAACATGGCTGGTAGTGAT  
AATGAATCTTGTTCATCTAGAAACAGCCAGGATGgTGATACCGCCCCAGCGGTAGCT  
ACCTCAAGCCAGAAAAGGCCACTGGGTCTCGGGAAAACCTAAGTAGGGTCTTGA  
CTATGGTGTGACCGAATATATTCGCAAAAGATTAGACATAAaAGAAAATTTAGAGAA  
ATTTATTAAGAGGAGARAGAACAGGCCAGAGGTTAAGTGATGATTTTTTTATTGA  
AGATGGTCAGGTTTTCCAAATGATTATGGCTTTTGTAGCGCAAAAGACACAAAAG  
CCGAGACCGAATCATTATAGAGTCTTGGCCGGTCTTaTGGTTTTTGTGTAATGAAGTT  
GCCGAACAAATGCCAGCCTTAAAAAGAGAATTGTTGGCCACCCGCACCACCTTAAA  
TgACAAAACAGAAAAATAGAATCCCTGTCAACCAAAATCCAACAGGCTGAGAGTA  
GACTCAGACAATCTAAAGAAGGTCAGGAAGAGTTAATGGGCCAGATCCAAAATGCT  
CAGACCTTATATGAAGACTACTCAAAAACTGCAAGAGAAATATCAAAAATGTAAA  
CAAGAAATAGAATATTACAAACAAGAAAGAAAAGGCCCTATTGAAGCAGACTCTGC  
TGACAGAGATAAAGAGAGTGAGGCAGAAATTGAGAACTYAGATCTGAGCAGAGA  
GCAATGGAGGGACRGATAGAAAGATTAACGGAACAGTTAGACTATGAATCCATGAG  
CCGAAGTCATTTAGAGGAAATGGAAAAACGGAAATATTCATATTTCCGGGGGACAC  
AGGTAAGTTACAATGAGACAGGGTCAGAAGACAGGTCACCCCCTAAGCTGCAAAGA  
TACTCCCAGAATGTACAGAGGAGGAAGTAGAAAGAGCTTCATATGGGCAGAAAAG  
GAAGCCTAGGACCCTAATAAAAAAATATGACACCCCCAAGATGATAAAATTCTTAA  
AAGAACTGTTCCCGTTTTCTCCAAGAAGGGTTCCCAAACCATCACTGACCATATAG  
GAACCTACGAACGTACCCTGAAAATCTTAAACATTCAGGACGATCGTACCAAATTT  
GAGTTACTGCCATGGATATTTGAAGAAAAGTACAGACAATTTCTTTGATTCATTGCAG  
GCTCTATACGGTCAGTCATGGAGGGAAATTAACATAGGTGTCAAATGGAGTTTGG  
GCCCTACAAAACCTGTTACCGCTGCCAAAGCCGCGGCCTACAATTTAAAATGTGGCCC  
TAATCAGAGTCCCACAGAATTCCTAGCCGTATTGAGAAGCGCATACTTTCTGGCTGA  
AAAGGACCCCAATCCGGACCAGCCAGAATTCAGACTCTATTTTTTGAAGCACTACC  
TGCTTATATCAAATTAGGACTGGCAAGGGATTTAAGAAAGGACGTTCCCTGGATTG  
GTTAGTCAGRGAGAGTGATCACCTGTACTCAATCCAGCAGTCCAGCGAAGGTGGGG  
TGAAAAGAGAAGCCAAACCTAACCCTAAAACCATAGCAGCCACTACTGTGACCCCC  
CAACCTCATGGTCTACAAACAGAGAGGAAATCATATGCTGAGGCAGTCCGAGATGG  
GAAACCCATGGGACCTCCCGGAGTTTCACCCAGCCACAGCAGATGATGGAGGACA  
GACAGAGGTTGCCAGGTTACGGTAGTGAGGGTGAAAGGGGCCCCAGGTACAGAAAT  
AGCCAGAGGGGATATCTGCAGGGGTCCCAGAACAACCAACAATCAAATTTGGAATCG  
AGATCCCAATTTCTAATAGGTACCCCTACTATAACAGGAACCCTAACTTTGTGAGAAA  
CCCCAATTTTCAAGGGTACCCACGCTTTAACAGAAATCCAAACTTCCACGGCCACCC  
TGGTTACTACAGAGACCCCAACTTCATAAGAGACCCTAATTTTAATGAGAATCCTGA  
TAATCGCAGGACACCTCCCAATCAGGAACAGGTCAATCACCCAGGGTTGGTGTAG  
CTCCCCAAATTTCCCAAAATCAAAGGGAACACAGGAACCCCCGAGAGAAAGGCCA  
CAGACCAAGACCAGAGGAGTGGTGATGAATCTGATGCATCACTGCAGTCCCGTCC  
TGAACGCAACCGGGTCAGGCAAAATAGGGCAAATCGCCAAAATACCATGGGCCGGC  
GAATCGAGCAGGTAGAGGCACAAATTAATCAGATGTGCGAACAAATGACACACCTG

ATCAATTACCAATCTACCAACCCGTCTTTTTTAGGGGCGCTCCTGTGACCAACCCA  
GGGTCACAGAATGCTTAGAACCCAGACAGTCTCCAGCAGGGGACAACCCTGGGT  
GCGATGACAGGAGACACACAACACCCCTGACATGCCCTAACAGGGGGGATCA  
GGGTGGGATTGTTAATTCTGCTCCTGTTTTTTCAGTATCCTTCTAACCCCTCTAATGTA  
GCTGAGCCACTGGGAGCCATTGTAATGACCAATCGGGCGGGATGCCTCCTACTCC  
GTGTGCTTCCGTCTCaAGTAGGCCCCCGCAGGCCATCCCAGGAATCATGAGTAGGG  
ATGAGCCGAACACCCCTGTTTGGTTTCGACCAGAACTCGCGAACACCGTTAAAGT  
CTATGGGACACGAACATGAATAATCAAAAGTGCTAATTTTAAAGGCTTATATGCAA  
GATATTGTCATAAAAAGTGTTTGGGGACCTGGGTCTGCCCCAGGGGACATGGATCA  
ATGCAAAAAAAGTTTTAAAAACGGCCATTTTTTCAGGAGCAGTGATTTTAATAATG  
CTTAAAGTGAAACAATAAAAAGTGTAATATCCCTTTAAATTTTCGTACCTGGGGGTGTC  
TATAGTATGCCTGTAAAGGGGCGCATGTTTCCCATGTTTAGAACAGTCTGACAGCAA  
AATGACATTTCAAAGGAAAAAAGTCATTTAAACTACTCGCGGCTATTAATGCATT  
GCCGGTCCGACAATACACATAGAAGTTCATCGAAATTTAAAGGGATATTACTTTTT  
ATTGTTTCACTTTAAGCATTATTAATACTACTGCTCCCGAAAAACGGCCGTTTTTAA  
AACTTTTTTGCATTGATCCTTGTCCCTGGGGCAGGACCCAGGTCCCCAACACTTT  
TTATGACAATACCATGAATATAAGCCTTTAAATAAGCACTTTTGATTACTCCATA  
GACTTTTAAAGGGTGTTCGCGGCATTCGAATTTGCTGCGAACACCCCAAATTGTTT  
GCTGTTTCGGCGAAGTTGCAAACGGCCAATGTTTCGAGTCGAACATGAGTTCGACTCGA  
ACTCGAAGCTCATCCCTAATCATAAGCACAAAGAAGCTGTGACATGCGGTGAGATA  
AATGCCAACTGTAAATTATTGGAAAGCCACAGATCCTCAACCACGCTAATTTTCATG  
TGTGAGTTGACTGAATCTGATGGAAGATATTTCACTACTGTAAAGGTACATGAGGCC  
GGTGATCACCCCATTTTCAGGTTTAATTGACACGGGATCCCAAGCCACCATCCTGTGCG  
CAGGAACAATTTAATGAAGCAATAAATTCAATGCCCAACAACCAAACTTAGGAG  
CTTTGATTGCTCACTAATCGGGGTGGGGGGAGAGCCACTGCAAGTCATGGGTACTGC  
CTGGCTTAAACTCAAATTAGGTAATAAGGAAATTAGGCACCCTATTATTATTGCAAA  
TCTCCACACCATCACATGATAATTGGAATGGATCTCCTTAAGAGGCTCAACACAAT  
TGTTGACTGTGTGAATCAAGTAATGTGGTTCACAGGTCAACTCCCCGATTAATATGA  
AAGACTTAAACTCCCCATTCCCGGCGCACTGCCACCTGGTGGAAGAAAGGCCTG  
GTTCCCTAGAAATCCACTTCAGGAATAGTCAGTTCCCGATGTTACGGTTATCCAAC  
CTGACAATCATGGCCTGGAAGTAGGAGATGAGGACCATATTTTTAAATTTCCCGTG  
ATAAAATAAAAGAGATCTCCCTCCAGGATAACGTACTGACCATATCCTTCCATCAGG  
AAAATAAAACTAAGAAAGGGGGAAATCACGCCAGTTCTGACAGAAATAGAAAG  
GGTTAGCAACGACCTATTTATCCCTATCCGGATAAATGGTCTTAATAGGTCAAAATA  
TGCCAAAATTGATCTAAAGCAAGAGCATAGCTTTGTGAGCCATGGCCTTGTAGCCA  
CCTTTCTGACATGGAAATGATCCGTTTCTCCACTCCTCAGCGACATTGGATGTCAGAT  
GCCATTGATGACTCTGAGGACCATAACTCAATTGCTAGATGCCTTTTAAATATCACT  
ATAGGTAATAAGACAACCACCCACGTGTTTCATAGTGCTGGATAATCCCAATCCCAA  
ATTTACCTCGGCAACGACTTACTGCATCGTTTTGCCACCCAAATTGACCTGATAAAT  
GACTGCTTATGGAGTCGACTAAAGGGGGACCCCGAGGGATAACCAGGATATGACCTC  
AGCCCTGAAGTTCCAGCAACAGATGCCTTATGCTGTTGAGATTCAGGTAGCTCGAGA  
AATTATCATCCCTAGGGACATAAAAAATTTCTACTCCCCATAAATGTAAAAAAGGG  
ACAAAACTGAAGGGATCAGATGCATTAGTATGCCTGTCCAGAGAATACAGGAGG  
AGGGAATAAAAAATTACcCACGCACCTTTGATCAATACACATCAGTCTATAATATCCA  
TCTACATCCACAACCTCTCAAATCAGGACCTTAACCTACCCAAGGGCACCTTATCG  
GCCTTGCGGTAGAGACGGGGTATTATACGTTTGGAGTCACCAACCAAGTGATTGGAC

TCATACCAGATGAATATTTATCTGAGGAGAAAATTAATTGAACAATCGTTCAATTCTT  
TACCCGAGGGTATR TTCACCATAGAGTCCATTTACCCCTTCGATTCTAAGGATGGTA  
CCTGTAGAATTGAAGAGACATCTCTCGTCTTTGATCAACCAATCAAAGAACAAGAGT  
ACCCCAAGGGACCTGACTGGGAGAAAAATACACCTCGCACACCCAATGACCTGACC  
ACCAGGCTTGAAGAGGCCTATGAGATAGGGAAACCTGAAAGCTTTCCGGGATTCAA  
AGAGATAGTCGAAGAGATCATAGCCCTAGCCGATGCATGCACCAATGATCTTGAGC  
GACAATTGCTCCGCGAACTTCTTTTTGAATTCCAGGAAATCTTTGCTCAGGATTCCTA  
CGATTGTGGGAATACTGATCTCCACATCGCCAAAATCCAGACCGACCCTCAGGCCCC  
ACCAGTATTTGTAAAGCAGTATAGACTTCCGCTAGCCTCCTATGAGTCTCTCGCCGA  
GATCATTAGGAAGTTACACGAACGGGGTATAATTAGGCCATCCACAGCTCGTACA  
ATCACCCCATCCTGGGGATTTTGAAACCCAACGGACAGTGGCGCTTGTGCGCTGATC  
TCCGACAACCTAATAAGCGTGTCTACATGTCAGGATGGCCCGTACCCTACATAGACC  
AGTGCCTTGCCCAACTCCAGGGRTCCAGGTATTCTCGGCCCTCGACTGTGCCCAGG  
GATACTGGACCATAAAAAGTCAGTGAAGAAGATCAGTATAAACTGGCCTTCAGTTTTG  
GGAACCAACAGTACTGCTGGGTGCGTATGCCTTTCCGGCTATATTAATTCTGGCCATG  
AATTTGCAGTCTTCATGCACAAGGCTATGCCAGATGCCTTGAGCGAGGAACATTGG  
CATACGTCGATGACATCCTCATCAAAGTACTGACATGACCAAACACCTCACAGAA  
CTCCGACACATCTTGGGCCAGCTAAGGACRGCCGGAGTGAAGTTATCCATTCAGAA  
AGCACAATGGTGCCGCACCCGAGTAAATTTCTTAGGCCATGAAGTTACCTCAGAAG  
GTTTAAACCCCCAAAAGAAAAAGGTTGAGGCAGTATTTAACTGTAAGGTCCCTACTA  
ATCTTAAAGAATTAAGATCGTTTCTAGGAATGGTTAACTATTCGCGTAAGTTCATCG  
ACAATTACGCCGAGATTAGCAAACCGTTACTTCATCTGCTGAAGAAAGACACTGAAT  
GGTCATGGGGCAAGGAACAAGCAGACGCTGTGAAGGAACTGAAGGTACGACTCACC  
CAAGCCCCCTGCCTTGCATCCAGAAGGAGGTAAACCCCTTTTTTCTTGAGACAGGG  
TACACGCAGGTGAGTATGAGTTCGGTCTTTATCAAAAACAAGAGAATGTCAGTAAG  
ATTATCGCCTATGCCAGTAAAACATTGTCCTCAGTAGAGATTAAGTTTTCTGACTGC  
GAAAAAGCTTTATTGTCCACTGTCTGGGCATTACAGAATTTCCGCAGTTACATTCAA  
GGTGAAGAATTATTGTTGAGACCGCACACCAGCCTTTACAGTATTTACAGAGTGAA  
CGTATCAGGGATGGAAATGTGTCTAATAGCCGCATCACTGCTTGGACTTTGTCCTTG  
CAAGGGTGGCCCCTGGAAATTCGATACAAACAGAACAAGAAAAGTCCAGTGGCCCA  
GGGCCTTGCTGAGCTGCATGATTGTTCCGCCCTGATCCCTGCGCGGGGACCACGGA  
CACTGACTTTTTAGAAACAACACTGTTGTCTCCCTACAAGGTTTATGATGATGAATA  
CTGTAAACAGTTGCCGTGTGTATATGTAGATGGCTGTGCCTATCATCATAAGGACAA  
AGACCAGCTCCAAGTGGCTGGCATCGGGATCATATGGACCCAAGGTGTAGCCC  
CAATCTCTGTGGGATACAAGCTTGGGCCAAGAAGCAGCCAAGTTGCTGAACTCGCT  
GCAATCCTGAAAGCCGTTGAGATGGCCATAGATTACCACCTTAAAGAATTTGCCATC  
ATCACCGATTCAAATTATGTCAGGAATAGTTTTGTTGAGTATCTTCCCCGATGGAAA  
AGGAACAACATGGTAAAAAGTAACCATAAACCTGTCAAACATGGTAAGTTGTTTTG  
TCAAATCGACCAATTGGTAAGGGAACACGAGATCACTCTGTATTTTAAGAAAACCA  
AGGGCCACTCCAAAGTCCTAGGTGAAGAAAAGGAAGGGAATGATCAGGCTGATACC  
CTAGCCAAAGAAGGGGCCCTAACAGGTGAGTTGCTAGATATAGATCATCTCTTAGGT  
TCAGTACAGTTAGAAGCTGTCACTAGACAACAAGCTAGGATGACTGATGATTCAAA  
TGTATTGCAATGGTGTGATGAAAACCCAGTGAAGATTTAATCACAGCCCAAAAAG  
AAGACCAATAAATTGGCTTATTTTATAACCATTTAGAACGCCCGGACCAGAATCCCC  
TTAGTCAAGAAAATTATCCTGGCAAGGAAGACTTACGTATATTAATGAAATCCAAAT  
CCCAGTTTACGCTGCATCAGGGATTGTTGATCCGCACCTCAAAGGGGGTATCCAAC

AATGGGTAGTCCCACTTAAATTCAGAGGTTAATGCTACAGCATGCCCATGACGCCC  
CCACGTCTGGGCACCGCGGAGAAAAATCACCTATGAGATCCTCCGGGATTACGCC  
TACTGGCCTCATATGCTGCGTGATGTGAAGGCATACTGCCAAGGATGCTTAATATGT  
CCTCAATTTCAACCAGCTTCGCCACCCATAGGGCACCCTTCAGAAAAGGGGGATA  
TGCATGCCTTGGTCAGACCTTCAAATGGATTTCAATTGGGCCTGTAACTAAATCTTCAC  
GAGGGAATCGATATATGTTAACCGTGACATGTTTATTTACCAAATATGTTGARTGTA  
TTCCAGCACCAAATAACAGCTCCGACACATGTGCCGCCCTTTTGATAAATCAcATCTT  
TTCACGCTTCGGCCTTCCCCAGAGAATAGAGTCTGATAGGGGTACACATTTCACTAG  
TGAAGTAATGACTAACTGTGGAAGATATTGGGCGTAAAAAGGAAATTACACATCG  
CCTATCGGCCCGCCTCTAGTGGTGGAGTGAACGGTACAATCAGACAATTGTAAAC  
ATACTCAAGAAATTTGTCAAGGAAACAGGCAAGGACTGGGATGTAAAGCTTCCCTT  
AGTCCTGATGGCCTTAAGGGCAACCCCGAATACGGTCCAAAAATGTCACCCTTTGA  
ACTCATGACCGGAAGGCGGATGGTCCTGCCCAACACCTCTTGTACCGCACCCTGA  
CCATAACTTGATCAATGCCACCACAACCTACCAATACATAGAAGATTTACGGAARC  
ATTTACAATATGCGTTCTCATTGCCCCAAAGAAATATTGAAAGAGCCGCAACTAGCG  
CTAAAACATACTATGACCTTAAAACCACCAAGAAGGAGTATGAAATTGGGGACAAG  
GTATATCTCTACAATTTACGAGAAACCAGGTAAAGGAACGGAAATTCCTGCCGTCC  
TGGAGAGGTCCATTTAACATTGTGGACAAGATCTCCCCGTGGCATATAAACTGCAT  
ATCCACGGAATGGTGAATCAGTGAGAGATGGGTGCACATCAATCAATTACGTGC  
TTGCCATCCCAAGTCCCAATTACAGTTGCTGGAGGACTAACCCCTCGGCAACATATAC  
CTTCAAGGTCAATCAAAAGGGTTAAATCACCTGAGAATAAAATTTTTTTTATCACAT  
CTCCACATGATACTCAAACCTGTCTATTTGTTTTCTTTTGACAGTGTATACATCAGAGG  
AATGATATCCCTGCCACCATCCAAACTCGCGATCAAAGATGATAGCGACCGGAAAT  
ACCAAAGACGGAACCCGGCCATGAGACTACCCAGGAAACTACCACATGGAAAGTC  
CTTGGTATTCTGCTATGGATGTCCATAACCAGGCCGGACCAGCCCCATCGCCCGACCA  
GGACCTTCTCTGGGATATTAGTCCAAGAAGCCCCCGGATTTATCTTAACAGACAAG  
AGAATCACCACCCAAAAAGTATGTATAAGCGTGGATCCAAAGACCTCTATAGAAAG  
ACTTTTTAACCACAGAGGATCCAATCCCCTGAGGTCAAGGAATGGTACCCCATGCA  
CCTGAAAGCAGCAAGAACTCGGGTGGACGAGATACTAACACAAGCTCGTAAGCCAT  
TTATCCCGGCAACTATAACCCGTGAGAAGAGACCCAAGAGGTTTCGTGGGAATCCTG  
GTAGCTGGACTCATCTTACCGTCCCTCGGAGCTGTAGTATCCACCACCATATCTGCC  
GCTAATTCGGTTTCCGTAAAGACTCTTACAACGGAAATTGAGAATTTACAAATGAAT  
ATTCAGCCATACACCAGGAACCTGAAACACAAAAAACTGAGTTCACCGATTTCCG  
CACCATCATCAATGACACGATGGTCACTGTAACTTACATTCAGAACTGATCACCCG  
GTCGATCGACCTCCATCAGAGTCACGAACTATTCAAAGGGAACTATTATTCATCCA  
GGAACCAATTCTTTTCCACACATTAGGATATCTAAATGAAATACAGAATGGAATGAA  
TGATCTCTCCACGGACATATTCCCCTGTACTTTGTGTCCACTGAGATGATAAAAAC  
CCTACTCACAAGgGTCAATGGGGGCGAGGTAGAAGATTTCCAAGTCAACCTGGCCTT  
CGAAACAGGAAGcGCTATGCCGCTATATATCAATCCCGAAGATCTTGAAGTATGTTT  
CTTGTTAGCCATACCCTTCGTCTCCTCTAAAAATATTTTCCAGATGAAAACAGTACAT  
AATGTCGGAACATGGAGGGGTGATATACACGTCCAGATCAAACCCCAGACCTGAT  
TGCTATCAACCATGGATGCCGGATTTATACGCTATACCCCTTTTAAAGGAATGCAC  
ACGATTCAAGGACATCAATTTCCAATGTAACGGAAACCCATTCGTGTATGACACAAC  
CCACGCCCTATGTGGCATGGAATATGAAAAACATGGTTCCGAAaAATGCGAAGTACA  
AATGCGGAAGACTACAGATgCCTCAGAAGTACAGGAaATACTCGTGAAGGACGAAT  
GGCTGGTGAGCACTcCGTTAAAAAACATGAGCATATTTTATGAAAAGCAaATCATGA



TTGCTGCGAACACCCCAAATTGTTTCGCTGTTTCGGCGAACTTGCAAACGGCCAATGTT  
CGAGTCGAACATGAGTTCGACTCGAACTCGAAGCTCATCCCTAATCATAAGCACAA  
AGAAGCTGTGACATGCGGTGAGATAAATGCCAACTGTAAATTATTGGAAAGCCCAC  
AGATCCTCAACCACGCTAATTTTCATGTGTGAGTTGACTGAATCTGATGGAAGATATT  
TCACTACTGTAAAGGTACATGAGGCCGGTGATCACCCATTTTCAGGTTTAATTGACA  
CGGGATCCCAAGCCACCATCCTGTTCGCAGGAACAATTTAATGAAGCAATAAATTCA  
ATGCCCAACAAACCAAACTTAGGAGCTTTGATTGCTCACTAATCGGGGTGGGGGG  
AGAGCCACTGCAAGTCATGGGTACTGCCTGGCTTAAACTCAAATTAGGTAATAAGG  
AAATTAGGCACCCTATTATTATTGCAAATCTCCACACCATCACATGATAATTGGAA  
TGGATCTCCTTAAGAGGCTCAACACAATTGTTGACTGTGTGAATCAAGTAATGTGGT  
CACAGGTCAACTCCCCGATTAAATATGAAAGACTTAAACTCCCCATTCCCGGCGAC  
ACTGCCACCTGGTGGAAGAAAGGCCTGGTTCCCTAGAAATCCACTTCAGGAATAGTC  
AGTTCCCGATGTTACGGTTATCCAACCTGACAATCATGGCCTGGAAGTAGGAGATG  
AGGACCATATTTTTAAAATTCCCCGTGATAAAAATAAAAGAGATCTCCCTCCAGGATA  
ACGTA CTGACCATACTCTCCATCAGGAAAATAAACTAAGAAAGGGGGAAATCAC  
GCCAGTTCCCTGACAGAAATAGAAAGGGTTAGCAACGACCTATTTATCCCTATCCGG  
ATAAATGGTCTTAATAGGTCAAATATGCCAAAATTGATCTAAAGCAAGAGCATAG  
CTTTGTGAGCCATGGCCTTGTTAGCCACCTTTCTGACATGGAAATGATCCGTTTCTCC  
ACTCCTCAGCGACATTGGATGTCAGATGCCATTGATGACTCTGAGGACCATAACTCA  
ATTGCTAGATGCCTTTTTAAATATCACTATAGGTAATAAGACAACCACCCACGTGTT  
ATAGTGCTGGATAATCCCAATCCCAAATTTACCTCGGCAACGACTTACTGCATCGT  
TTTGCCACCCAAATTGACCTGATAAATGACTGCTTATGGAGTCGACTAAAGGGGGAC  
CCCGAGGGATACCAGGATATGACCTCAGCCCTGAAGTTCCAGCAACAGATGCCTTA  
TGCTGTTGAGATTCAGGTAGCTCGAGAAATTATCATCCCTAGGGACATAAAAAATTT  
CCTACTCCCCATAAATGTAAAAAAGGGACAAAACCTGAAGGGATCAGATGCATTAG  
TATGCCTGTCCAGAGAATACAGGAGGAGGAATAAAAATTACCCACGCACCTTTG  
ATCAATACACATCAGTCTATAATATCCATCTACATCCACAACCTCTCAAATCAGGAC  
CTTAACCTACCCAAGGGCACCTTATCGGCCTTGCGGTAGAGACGGGGTATTATACG  
TTTGAGTACCAACCAAGTGATTGGACTCATAACCAGATGAATATTTATCTGAGGAG  
AAATTAATTGAACAATCGTTCAATCTTTACCCGAGGGTATRITCACCATAGAGTCC  
ATTTACCCCTTCGATTCTAAGGATGGTACCTGTAGAATTGAAGAGACATCTCTCGTC  
TTTGATCAACCAATCAAAGAACAAGAGTACCCCAAGGGACCTGACTGGGAGAAAAA  
TACACCTCGCACACCCAATGACCTGACCACCAGGCTTGAAGAGGCCTATGAGATAG  
GGAAACCTGAAAGCTTTCCGGGATTCAAAGAGATAGTCGAAGAGATCATAGCCCTA  
GCCGATGCATGCACCAATGATCTTGAGCGACAATTGCTCCGCGAACTTCTTTTTGAA  
TTCCAGGAAATCTTTGCTCAGGATTCTACGATTGTGGGAATACTGATCTCCACATC  
GCCAAAATCCAGACCGACCCTCAGGCCCCACCAGTATTTGTAAAGCAGTATAGACTT  
CCGCTAGCCTCCTATGAGTCTCTCGCCGAGATCATTAGGAAGTTACACGAACGGGGT  
ATAATTAGGCCCATCCACAGCTCGTACAATCACCCCATCCTGGGGATTTTGAAACCC  
AACGGACAGTGGCGCTTGTGCGCTGATCTCCGACAACCTCAATAAGCGTGTCTACATG  
TCAGGATGGCCCGTACCCTACATAGACCAGTGCCTTGCCCAACTCCAGGGRTCCAG  
GTATTCTCGGCCCTCGACTGTGCCAGGGATACTGGACCATAAAAGTCAGTGAAGA  
AGATCAGTATAAACTGGCCTTCAGTTTTGGGAACCAACAGTACTGCTGGGTGCGTAT  
GCCTTTCCGGCTATATTAATTCTGGCCATGAATTTGCAGTCTTCATGCACAAGGCTATG  
CCAGATGCCTTGGAGCGAGGAACATTGGCATAACGTCGATGACATCCTCATCAAAG  
TACTGACATGACCAAACACCTCACAGA ACTCCGACACATCTTGGGCCAGCTAAGGA

CRGCCGGAGTGAAGTTATCCATTCAGAAAGCACAATGGTGCCGCACCCGAGTAAAT  
TTCTTAGGCCATGAAGTTACCTCAGAAGGTTTAAACCCCCAAAAGAAAAAGGTTGA  
GGCAGTATTTAACTGTAAGGTCCCTACTAATCTTAAAGAATTAAGATCGTTTCTAGG  
AATGGTTAACTATTCGCGTAAGTTCATCGACAATTACGCCGAGATTAGCAAACCGTT  
ACTTCATCTGCTGAAGAAAGACACTGAATGGTCATGGGGCAAGGAACAAGCAGACG  
CTGTGAAGGAACTGAAGGTACGACTACCCAAGCCCCCTGCCTTGCGTATCCAGAA  
GGAGGTAAACCCTTTTTTCTTGAGACAGGGTACACGCAGGTGAGTATGAGTTCGGTT  
CTTTATCAAAAACAAGAGAATGTCAGTAAGATTATCGCCTATGCCAGTAAAACATTG  
TCCTCAGTAGAGATTAAGTTTTCTGACTGCGAAAAAGCTTTATTGTCCACTGTCTGG  
GCATTACAGAATTTCCGCAGTTACATTCAAGGTGAAAGAATTATTGTTGAGACCGCA  
CACCAGCCTTTACAGTATTTACAGAGTGAACGTATCAGGGATGGAAATGTGTCTAAT  
AGCCGCATCACTGCTTGGACTTTGTCCTTGCAAGGGTGGCCCCCTGGAAATTCGATAC  
AAACAGAACAAGAAAAGTCCAGTGGCCCAGGGCCTTGCTGAGCTGCATGATTGTTC  
CGCCCCCTGATCCCTGCGCGGGGACCACGGACACTGACTTTTTAGAGAACAACACTGTT  
GTCTCCCTACAAGGTTTATGATGATGAATACTGTAAACAGTTGCCGTGTGTATATGT  
AGATGGCTGTGCCTATCATCATAAGGACAAAGACCAGCTCCAAGTGTGGCTGGCA  
TCGGGATCATATGGACCCAAGGTGTAGCCCCAATCTCTGTGGGATACAAGCTTGGGC  
CAAGAAGCAGCCAAGTTGCTGAACTCGCTGCAATCCTGAAAGCCGTTGAGATGGCC  
ATAGATTACCACCTTAAAGAATTTGCCATCATCACCGATTCAAATTATGTCAGGAAT  
AGTTTTGTTGAGTATCTTCCCCGATGGAAAAGGAACAACATGGTAAAAAGTAACCAT  
AAACCTGTCAAACATGGTAAGTTGTTTTGTCAAATCGACCAATTGGTAAGGGAACAC  
GAGATCACTCTGTATTTAAGAAAACCAAGGGCCACTCCAAGTCCTAGGTGAAGA  
AAAGGAAGGGAATGATCAGGCTGATACCCTAGCCAAAGAAGGGGCCCTAACAGGT  
GAGTTGCTAGATATAGATCATCTCTTAGGTTTCAGTACAGTTAGAAGCTGTCACTAGA  
CAACAAGCTAGGATGACTGATGATTCAAATGTATTGCAATGGTGTGCATGAAAACCC  
AGTGAAGATTTAATCACAGCCCAAAAAGAAGACCCAATAATTGGCTTATTTTATAAC  
CATTTAGAACGCCCAGGACCAGAATCCCCTTAGTCAAGAAAATTATCCTGGCAAGGA  
AGACTTACGTATATTAATGAAATCCAAATCCCAGTTTACGCTGCATCAGGGATTGTT  
GATCCGCACCTCAAAGGGGGTATCCAACAATGGGTAGTCCCACTTAAATTCAGAG  
GTTAATGCTACAGCATGCCATGACGCCCCACGTCTGGGCACCGCGGAGAAAA  
ATCACCTATGAGATCCTCCGGGATTACGCTACTGGCCTCATATGCTGCGTGATGTG  
AAGGCATACTGCCAAGGATGCTTAATATGTCCTCAATTTCAACCAGCTTCGCCCCACC  
CATAGGGCACCCCTTCAGAAAAGGGGGATATGCATGCCTTGGTCAGACCTTCAAAT  
GGATTTCAATGGGCCTGTAACCTAAATCTTACGAGGGAATCGATATATGTTAACCGT  
GACATGTTTATTTACCAAATATGTTGARTGTATTCCAGCACCAAATAACAGCTCCGA  
CACATGTGCCGCCCTTTTGATAAATCACATCTTTTACGCTTCGGCCTTCCCCAGAGA  
ATAGAGTCTGATAGGGGTACACATTTCACTAGTGAAGTAATGACTAAACTGTGGAA  
GATATTGGGCGTAAAAAGGAAATTACACATCGCCTATCGGCCCCGCTCTAGTGGTGG  
AGTGGAACGGTACAATCAGACAATTGTAAACATACTCAAGAAATTTGTCAAGGAAA  
CAGGCAAGGACTGGGATGTAAAGCTTCCCTTAGTCCTGATGGCCTTAAGGGCAACCC  
CGAATACGGTCACAAAAATGTCACCCTTTGAACTCATGACCGGAAGGCGGATGGTC  
CTGCCCCAACACCTCTTGTACCGCACCACTGACCATAACTTGATCAATGCCACCACA  
ACTACCAATACATAGAAGATTTACGGAARCATTTACAATATGCGTTCTCATTGTC  
CAAAGAAATATTGAAAGAGCCGCAACTAGCGCTAAAACATACTATGACCTTAAAC  
CACCAAGAAGGAGTATGAAATTGGGGACAAGGTATATCTCTACAATTTACAGAGAA  
ACCAGGTAAAGGAACGGAAATTCCTGCCGTCCTGGAGAGGTCCATTTAACATTGTG

GACAAGATCTCCCCGTGGCATATAAACTGCATATTCCACGGAATGGTGAAATCAGT  
GAGAGATGGGTGCACATCAATCAATTACGTGCTTGCCATCCCAAGTCCCAATTACAG  
TTGCTGGAGGACTAA

>Loki-Rca consensus sequence Pol protein

LLRTPQIVRCSANLQNTANVRVEHEFDSNSKLIPNHKHKEAVTCGEINANCKLLESPQILN  
HANFMCELTESDGRYFTTVKVHEAGDHPISGLIDTGSQATILSQEQFNEAINSMPNKPKL  
RSFDCSLIGVGGPELQVMGTAWLKLKLGKKEIRHPHIIANLPHHHMIIGMDLLKRLNTIVD  
CVNQVMWSQVNSPIKYERLKTPHSRRHCHLVEERPGSLEIHFNRNSQFPDVTVIQPDNHG  
LEVGDDEDHIFKIPRDKIKEISLQDNVLTISFHQENKTKKGGNHAQFLTEIERVSNDLFIPIRI  
NGLNRSKYAKIDLKQEHFVSHGLVSHLSDMEMIRFSTPQRHWMSDAIDDSSEHDNSIAR  
CLLNITIGNKTTTHVFIVLDNPQSQIYLGNDLLHRFATQIDLINDCLWSRLKGDPEGYQD  
MTSALKFQQQMPYAVEIQVAREIIIPRDIKNFLLPINVKKGQKLGSDALVCLSQRIQEEG  
IKITHAPLINTHQSIISYIHNLSNQLNLNPKGTLIGLAVETGYTFTGVTNQVIGLIPDEYLS  
EEKLIEQSFNSLPEG?FTIESIYPFDSKDGTCRIEETSLVFDQPIKEQEYPKGPDWEKNTPR  
PNDLTTTRLEEAYEIGKPESFPGFKEIVEEIIALADACTNDLERQLLRELLFEFQEIFAQDSY  
DCGNTDLHIAKIQTDPQAPPVFKQYRLPLASYESLAEIIRKLHERGIIRPIHSSYNHPILGI  
LKPNGQWRLCADLRQLNKRVMMSGWVVPYIDQCLAQLQ?SQVFSALDCAQGYWTIKV  
SEEDQYKLAFSFGNQYCWVRMPFGYINSGHEFAVFMHKAMPDALERGTLAYVDDILI  
KSTDMTKHLTELRLHILGQLR?AGVKLSIQKAQWCRTRVNFLGHEVTSEGLNPQKKKVE  
AVFNCKVPTNLKELRSFLGMVNYSRKFIDNYAEISKPLLHLLKDEWSWGKEQADAV  
KELKVRILTQAPCLAYPEGGKPFLEGTGYTQVSMSSVLYQKQENVSKIIAYASKTLSSVEI  
KFSDEKALLSTVWALQNFRSYIQGERIIVETAHQPLQYLQSERIRDGNVNSNRITAWTSL  
LQGWPLEIRYKQNKKSPVAQGLAELHDCSAPDPCAGTTDTDFLEEQLLSPYKVYDDEY  
CKQLPCVYVDGCAYHHKDKDQLQLVAGIGIWTQGVAPISVGYKLGPRSSQVAELAIL  
KAVEMAIDYHLKEFAIITDSNYVRNSFVEYLPRWKRNNMVKS NHKPVKHGKLCFCIDQ  
LVREHEITLYFKKTKGHSKVLGEEKEGNDQADTLAKEGALTGELLDIDHLLGSVQLEAV  
TRQQARMTDDSNVLQWCHENPSEDLITAKEDPIIGLFYNHLERPDQNPLSQENYPGKE  
DLRILMKSQSFTLHQGLLIRTSKGGIQQWVPLKFRGLMLQHAHDAPTSGHRGEKITY  
EILRDYAYWPHMLRDVKAICYQGCLICPQFQPASPTHRAPLQKRGICMPWSDLQMDFIGP  
VTKSSRGNRYMLTVTCLFTKYV?CIPAPNNSSDTCAALLINHIFSRFGLPQRIESDRGTHF  
TSEVMTKLWKILGVKRKLHIAYPASSGGVERYNQTIIVNLLKFKVKTGKDWDVKLPL  
VLMALRATPNTVTKMSPFELMTGRRMVLPQHLLYRTTDHNLINATTTTHQYIEDLR?HLQ  
YAFSFAQRNIERAATSAKTYIDLKTTKKEYEIGDKVYLYNFTRNQVKERKFLPSWRGPF  
NIVDKISPVAYKLHIPRNGEISERWVHINQLRACHPKSQLLLED\*

>Loki-Rca consensus sequence *env* gene

TTGTGGACAAGATCTCCCCGTGGCATATAAACTGCATATTCCACGGAATGGTGAAA  
TCAGTGAGAGATGGGTGCACATCAATCAATTACGTGCTTGCCATCCCAAGTCCCAAT  
TACAGTTGCTGGAGGACTAACCTCGGCAACATATACCTTCAAGGTCAATCAAAAAG  
GGTTAAATCACCTGAGAATAAAAATTTTTTTTATCACATCTCCACATGATACTCAA  
GTCTATTTGTTTTCTTTTGACAGTGTATACATCAGAGGAATGATATCCCTGCCACCAT  
CCAACTCGCGATCAAAGATGATAGCGACCGGAAATACCAAAGACGGAACCCGGCC  
ATGAGACTACCCAGGAACTACCACATGGAAAGTCCTTGGTATTCTGCTATGGATG  
TCCATACCAGGCCGACCAGCCCCATCGCCCGACCAGGACCTTCTCTGGGATATTA  
GTCCAAGAAGCCCCGGATTTATCTTAACAGACAAGAGAATCACCACCCAAAAAGT  
ATGTATAAGCGTGGATCCAAAGACCTCTATAGAAAGACTTTTTAAACCCACAGAGGAT  
CCAATCCCCTGAGGTCAAGGAATGGTACCCCATGCACCTGAAAGCAGCAAGAACTC



GGGTGGACGAGATACTAACACAAGCTCGTAAGCCATTTATCCCGGCAACTATAACC  
CGTGAGAAGAGACCCAAGAGGTTCTGTGGGAATCCTGGTAGCTGGACTCATCTTCAC  
CGTCCTCGGAGCTGTAGTATCCACCACCATATCTGCCGCTAATTCGGTTTCCGTA  
GACTCTTACAACGGAAATTGAGAATTTACAAATGAATATTCAAGCCATACACCAGG  
AACTTGAAACACAAAAAACTGAGTTCACCGATTTCCGCACCATCATCAATGACACG  
ATGGTCACTGTAACTTACATTCAGAACTGATCACCCGGTCGATCGACCTCCATCAG  
AGTCACGAACTATTCAAAAAGGGAAGTATTATTCATCCAGGAACCAATTCTTTTCCAC  
ACATTAGGATATCTAAATGAAATACAGAATGGAATGAATGATCTCTCCACGGACA  
TATTTCCCTGTACTTTGTGTCCACTGAGATGATAAAAACCCTACTCACAAGGGTCAA  
TGGGGGCGAGGTAGAAGATTTCCAAGTCAACCTGGCCTTCGAAACAGGAAGCGCTA  
TGCCGCTATATATCAATCCCGAAGATCTTGAAGTATGTTTCTTGTAGCCATACCCTT  
CGTCTCCTCTAAAAATATTTTCCAGATGAAAACAGTACATAATGTTCGGAACATGGAG  
GGGTGATATACACGTCCAGATCAAAACCCCGACCTGATTGCCTATCAACCATGGAT  
GCCGGATTTATACGCTATACCCCTTTTAAAGGAATGCACACGATTCAAGGACATCAA  
TTTCCAATGTAACGGAAACCCATTCGTGTATGACACAACCCACGCCCTATGTGGCAT  
GGAATATGAAAACATGGTTCCGAAAAATGCGAAGTACAAATGCGGAAGACTACAG  
ATGCCTCAGAAGTACAGGAAATACTCGTGAAGGACGAATGGCTGGTGAGCACTCCG  
TTAAAAACATGAGCATATTTTATGAAAAGCAAATCATGAGCCGTGTCATAGCTATA  
CCCGCTACCGTATCTATTATCAAAGTTCCAACCAATGCCAGAATCACGATAGGGAAA  
ACCACATTATATCCGATAGGAACCGAAGTCTGGGAAGGGGAAGTTGAAAGTGTGCA  
TGCCTTCCAACATCAAGACATACCAATGAACCCGGACCTCAAATTCCTGTTAGAACA  
TAAGCCTAACACACCCTCCAGATGTCTATAAAAAAGAACAATCTGTCAATTGAAGC  
TTTTGAATATTCCGAGAAGGACCACATCTTATTAGAAAGCAGATCATATTTTCCACT  
GACAGATATAATAATTTTAAATCTGTATCGGACTGTTAATACTATGGTTAGTGGTTCTC  
ACCATCCAATTGACAAAAGTATCCCGAGAAACCCACGAACAATTACCAACGGTCTT  
GAGGCTCATTAGCGGAGGTTACCAACAACCTTAA

>Loki-Rca consensus sequence Env protein

LWTRSPWHINCIFHGMVKSVRDGCTSINYVLAIPSPNYSCWRTNPRQHIPSRSIKRVKSP  
ENKIFFITSPHDTQTVYLFSFDSVYIRGMISLPPSKLAIKDDSDRKYQRRNPAMRLPQETT  
TWKVLGILLWMSIPGRTSPIARPGPSSGILVQEAPGFILTDKRITTKVCISVDPKTSIERLF  
NPQRIQSPEVKEWYPMHLKAARTRVDEILTQARKPFIPATITREKRPKRFVGLVAGLIFT  
VLGAVVSTTISAANSVSVKTLTTEIENLQMNIAIHQELETQKTEFTDFRTIINDTMVTVN  
LHSELITRSIDLHQSHELFKRELLFIQEPILFHTLGYLNEIQNGMNDLSHGHIPLYFVSTEMI  
KTLLTRVNGGEVEDFQVNLAFFETGSAMPLYINPEDLEVCFLLAIPFVSSKNIFQMKTVHN  
VGTWRGDIHVQIKTPDLIAYQPWMPDLYAIPLKECTRFKDINFQCNGNPFVYDTTHAL  
CGMEYEKKGSEKCEVQMRKTTDASEVQEILVKDEWLVTPLKNMSIFYEKQIMSRVIAI  
PATVSIHKVPTNARITIGKTTLYPIGTEVWEGEVESVDAFQHQDIPMNPDLKFLLEHKPNH  
TLQMSIKKNNLSIEAFEYSEKDHILLESRSYFPLTDIIILICIGLLILWLVLTIQLTKVSRET  
HEQLPTVLRLLISGGYQQP\*

>Loki-Npa consensus sequence

TCAGATCGTAAATTGTGGGGTCTCAGACGCATATCAGTTTAGATGGTGCCAGTCTGT  
GTAGGGCTTGGTCGTTTAAATTCCTTACCTCCCTATGAGAGATTAGAATTTCTAAAG  
AGTTTTTTTTTCTTTTCTTCTTTTCTTTAATGAATAGACAAAGGGGGTATTTTAAAG  
TTCCTTATGAAACATTAATATTCATTGTGGTGATAATATTAGTAACAATGTTATGATA  
ATAATATTATATCATATGTAGCATCTATCTGCCTACTTAATTGACTGATTTTAAAGTA  
GAATTTTATACGTGTACTTTTATATATCAACTATATTCATTATATATTGGTTGAGTG

TACCCATTGAAATATATTCATGTGTATTACTAATAATGGGGTTTTTATATTTAAGTGC  
AAAGAATTAGGTGGTACATTCTAATGTATATTCTTTTCTTATAAGGTATGAAAAACC  
TCGGTCTTAAAACCTTCTACCTCACTTTTAAGGAATTGAGAAAGAATGTTAATTGCTT  
AAGTTAGACTGTTTTTCCAAGCCGTA AATTGCAGGACCAGACCGATAGTTTGGCATG  
GTAGGATTAAGTATTGCCAAAAGTTTATATTTATGGGTCTTGTCCAGGGTCTTCGGTC  
TAAGGTCATATCACTGCCTTATCTTCAATAATTAGTAAAATTA AATTA AATGCTCCC  
AATTTTTACATAGAACAATAGCGCCCCCTGATGGTGATTGTGAGGGAAAGTCTATAA  
CCATATGGGGCATTGACGTCATGTTACACGTCAGTAATCACGTGTTAGATCAAACC  
AAGCCCCTCCGCAGGGGTATATAGATCAGGAGCACAAAGTGAAGAGGGAGAGTAA  
AATTC AATCAAGAGAGAGAATCGAACATCAAGGCAGTAAGCAAATACATTCCAGAG  
GGTATAGGTCAGAAGCTGAGGACGGCTGTCTAGGAAACTGAATTAAGAGAACCT  
GACTATTCCTGGTGGCCGAGCATTGACTGCTGACTTCTTCCAAAACA AACTAAATTTA  
TATTGCTGGTAAAGTATACTTTATATCTGTATATTAGGCAATTCATCAGCCACATATA  
TATATATTCGGGTAAACCATTAAGTTCTTGTA AATCGTGGCCAGAATTTCTTTATGTA  
ATATGTGAATTGGCGGAAAAATTA AAAAAAGCAAATATGAAACCAGGCGAAGGG  
CTGATAATGTTAAAAGTTACGAGAAGCCCTGCGTAAGATTGAAATTGAATCTGAA  
AAGGTTTCTAATGAGATGGCACAATTGTCTGCCCAAATGTCGGGTTATAGTGATAGA  
GATATTCAG AATAGAGATTTGATCAGTACTCTTAAAAGGGATCTGGATCAAATCTCT  
AAAGAATCATCAGAACATGAAAGGTcAAAATTGGCTCTAGAAGAAGAATGTGAAAA  
GTTGTTTACTGCCAATAGAAAACACTACAGGAGGAGTTGGATGGCCAGAATCTGGCAT  
ATCTGCAGTCTGTGCAGGAAAAACAGGCCAGCAGCGCAAAGGTTAAACCTTCTGGT  
TGGGAGGGGGTAAATGTC ACTGAAACTGTTAGCagcTCACACCCAGACTTTTGGTCTG  
TTAAACCTAACATTGTTAGACGaACCATAAAAGAGAGGTTTTTCAGATGTTGAAAGTG  
ATTT CAGTGTCCCCTCAGAGGAAGAAGAACATTGTTTTACTAAGGAACGTTCTCTTC  
CTAAATTA AAAACCCATCTCACCTCATAAGCACTCCAAAAGTAAGTCCCATAGGAGTG  
AGAGGAGAGTCTATCAGCCTGTGTTTGATACAACAAAAGTCATTAAGTTTTTAAAAG  
AAACTGTGGGTCTATTTACTAAGAAAGGATCGCCTTCTGTAATTAATCATATAGAAA  
CTTATGAGGAGGCGATGATGACCCTAAACTTAAGAAGTGACAAACAGAAAATTGAA  
TTCATTT CATGGGTGTTTGAGCCAAAGCACAGGTACTTCTTTACTTCCCTACGTGATA  
TGGGTATAAATACCTGGTCTGAGGTCGTCTCAGAAATAAAGACAGAATTTGGTCCCT  
ATCGGTCAGCTACTGCTGCCAGGAGAGCCATTTTTACTTTGAAATGTCGGCCGAATC  
AGAGTCCCAGGGAATTTTTGTCAGTTCTCAAGAATGCCTATAGCCTGGCTGAGAAAG  
ATCCCAATTTTGAGAGCCATGAATTCATCCA ACTGTTTTATGATGCTTTGCCAATAA  
AATAAAAATTAGTCTTGCCCGGGATTACCATCCCAGGAAA ACTCTGGATTGGCTACT  
GACAGAGAGTACCACCCTTTACGCTGTTTTACAAAATAGCGATGAATCCCAGGATAG  
GAGATTTAGGAAGCCAGCTGACGAGATAGCTGAGACTCATaTTAAAAGGGATCAGG  
GACAGTTTGAAGCCCCAAAAAGGAGTTATGCTGAAGTGGTTAAGAACCC CAGTACT  
CCTAAATTGAACAAGGCCAAACCCAATCCAGATAATAAGGTACCAAGTGTGATGA  
AGACCCCGGTGAAAAGCATCATTATGTAAAAGGCAGTTCCTCCTTTCAGGAGATA  
TCAGAGAGGTTATTT CAGGAAGTTCAGCATGGCCCAGATAAAaGTCCAAAATGGTTC  
TGAATCAGAAGGTTCTGGTAAATCGCAGGCTTCTAATTC AAAAACCCACCTCCCAA  
GGGTCATTGGAAAAATAGAAGCAATTTATATGATCGAATGGACCA AATGCAGAACC  
AATTTGGTGCTTTGGCAGAACAGCTGGAAAAGATATCCAACGTCCTCTCTGCTAAAC  
CCAAAATCCTTTTTT TAGGGGAGGCTACTCCGGGCGAAAGCCCTCCACAATA nCAAA  
TGGGGATAAACAGGTTAAAGTGTCCAATCATGCAAATACCAATGATTTACCAAGAT  
GCAAAGTGAGCAAATTAACCCAAGTGTGTATGCCTGAAAATAATTTAACCTTCCA

ATGCCAAATGGCAAGGAGGAGGGGCGACATGCTTGTGATTTTATCTTGCAGCCCACC  
GAGTCTTCAGCCGTGCAAAGCCTGACAGGCACTCTTGCCTGTGAAGAAAAAGAAGG  
GGGGTCGCGGGTCAAGATACACAGAGAGCAAaAAGCAGCTTCACTTGTCCATCCAA  
AATATCTCTGTaCCTTACATGAGATAGAACACAGGTATTTCAATTGAtGTGGAATTGCA  
TAAGAATTTACCACAAATAATGGCTTTATTGGACACGGGTAGCCAAGTCACCATTTT  
ATCTCAGAAATATTTTCAACAAATCCAGGATTTATCTTCTGAGAAGTATAAGCTGAA  
AAGTTTTACAGCTAACCTTGTAAAGTGTTCAGGCACTGCCCTTAAGGTCATAGGAAA  
AGCcTGGCTGAACTTCAACTTGGGGAATAAAGTAATTTGCCATCCCACACTTATAGT  
TGATTTGCCCTATGATCGCTTAATTATTGGCATAGATCTCCTTAAGAGATTAATCCT  
ATTGTTGATTTTATCAATAAGGTTATCTGGTCCCAAGTGAGAATGCCCATTAACTAT  
GAGCATTCCAATCCTATCACAGTCGGCGTAACTGCCATGTGATTGAGGAAAGGCCG  
GACTCTATTGAGATCCATTTAGGAATAGCCAAGTCCAGATGTCTCCTTCTTACAG  
GCAACACCGACCTCCACCGTAGGTGGACAGGAGGATAACACCATATGTGTGTCCCC  
TGAAAGAGTTAGAGATGTTTGCTTGGAAAGGTGATGTTCTCACCATTCACCTCCATCC  
AGAAAATACTGACTCTACTGGGTTCAGTGATCATGCgCAATTCCTAGCAGGGATTGA  
AAAGGTGAATGATGATGTGTTCTTTCCCTTACAGGTTAATGACCTGGGAAGAATAA  
AAGGGCTAAACTGGATTTACGCCAGGAGAACAGTTACATTAGTAGGGACCTACTAA  
AACAAATGGCCAATCCTAAAGTAATTAGGTATCCAAACCCTCAGGATAACTGGGTC  
CATGATTTGGATGATGACTCaAACAGTCATAATATAATTGCTAAATGCATGTTATCCA  
TTTCTATTGGGGGTAAATCAGCCACTCATTTATTCTGGTACTCAATGAGCCACGGT  
GTCATATTTACATTGGCAACGATATATTACATCGCTTTGCTATACATGTGGATTTGGT  
GAATTCCACATTGTGGACTAGATTAAGGTAATCCATGTAGTTTCATGAGTGAACA  
TGAAGCCCTCAAATCATCaCAGATACTGCCATATGCAGTAAGTGTATTAGTACCACA  
AAATGTTATCATCCCTCCAGGTAATAAATTTCTGTTACCCATACAGGTATCAAA  
AGGCCAAAAATTAAGGAATCCTGATGCATTAATATGCCTCTCAGACAGGATGCAAC  
AATTAGGAATTTAGTAAATCCTACACCCATGGTaAACATACATCCATTCAAAACCC  
AAATAATTGTTAATAACaGTACGCCAAATGAAGTCCAATTGTCTAAAGACACCATTA  
TTGGTTTGGCATTAGATTCAGATTATTATACTTTTGGGTTTCAAATGTAATTATTGG  
CCTAATACCTGAACCATATCTCACCGAGGAGCAAATGGTTGAACAGACATTTTATTC  
TTCTCCTGAAGGATTGTTACCATTAACTCAGTTTATCCTTTTAGTCCTGAAGAAGGT  
ACCTGCAAGGTgGAGGAATCCTCCCTCACCTTTGATCATACTTAATGAGCAGGAA  
GCCGAGGAATATCGTGAGTGTACCGAAAAGGCTAGTAAGTCAAATCATGACCTCAC  
TGACAGGCTTGAGGAAGCCTATGAAATAGGTCAACCTGAAGTTTTTCCAGGATTTCT  
GGAAATGGTCCAGCAGCAAATATCTTTAGCCGATGGATGTTCTAGTGACCTAGAGCG  
CCAACAATTGAAAGAAGTCCTACTGGAGTTCAAGGATATCTTTGCTAAAGATTCCTA  
TGATTGTGGTCTAACAGACATACACATTGCTAGAATTCAGACTGATCCAAAGGCACC  
TCCTGTTTATATCAAGCAATATCGTCTTCCACTAGCATGTTACGATTGCTAGCGGAA  
ATTATAAGGAATCTCAAGGAAAGAGGCGTTATAAGATCGGTGCACAGTTCTTATAAT  
AATCCTATTCTTGGTATCCTTAAACCGAATGGTCAATGGCGTTTATGTGCTGATCTCA  
GACAGCTCAATAAACGAGTATATATGTCCGGCTGGCCCGTGCCATATATTGACCAAT  
GCTTGGTACAAATGCAAGGCGCCAGGATCTTTACCACATTGGATTGTGCTCAAGGGT  
ATTGGACCATCAAGGTAAGTCCTGAAGACCAATATAAATTGGCATTACATTTGGTA  
AGGAGCAGTACACCTGGACCAGAATGCCGTTTGGTTACATAAACTCAGGTCATGAA  
TTTGCTGTGTTCTTACATAAGGCTATGCCTGATGCAACTGAAAGAGGAAATTTAACA  
TACGTGGATGATATTTTGTGAAAAGTACCTCGTTTGAAAAACATGTaCAAGAGATT  
AGGCATGTGCTTAATCAGTTGAGAGAGGCAGGTGTTAAATCTCTTTACAGAAAGCC

CAATGGTGTCTGACCAAGGTCAACTTCTTGGGACATGAGGTTACTTCAGAAGGCCTC  
AATCCCCAAAAGAAGAAAGTGGAGGCTGTGATGAAGTCTAAGACACCCACCAATGT  
CAGTGAAGTGTGAGGTCATTTTTGGGTATGATGAATTATTCACGTAAGTTTATTGATAA  
TTATGCGGAAATTAGTAAACCATTGTTGACATTGTTAAAGAAGGATGTACCATGGAT  
GTGGGGTGTGAGGATCAGGAACAAGCCATGAATGAGCTTAAAAGAAAACCTCACCCAAG  
CCCCATGcCTAACcTATCCAGAGGGGGGTAAACCCTTTTATCTGGAGACTGGTTTTAC  
AAACCTCAGTATCAGTGCAGTACTGTGTCAAAAACAAGACAAATTGAACAAAGTTA  
TTGCTTATGCAAGTAAaTCCCTGTACCTGTAGAGGTAAAATTTAACGACTGTGATA  
AAGCTTTATTAGCCACAGTCTGGGCCCTTCAAACTTTAGAAGTTACATTCAGGGTG  
AGAAAATCATCATTGAAACGGCCACCAACCGCTACAGTATTTGCAAAGTGACAAA  
ATCAGGGATGGTAATTTGTCCAACAGCAGAATAACTGCTTGGACGTTATCCTTACAA  
GGATGGCCATTGGAAGTCCGGTATAAACAAAATAAAAAGAGTCCAGTAGCTCAAGG  
ACTTGCCGAACCTTCATGATTGTGCAGCTCCTTCTCcTAcAGAAGAGCTATTAGATGAT  
TTCTTAGAGGAACAAATCTCTTCCCCTTACAAAGCATATGATGAGGAGTACTGTCTT  
CTACTCCCCTGTGTATACATTGATGGTTGTGCTTATCACACCACCGTAGGGGATGAG  
AGAAAAGTGTGGCTGGTATTGGAATCACTTGGACAAGTGAATTCCCAGATGTATCA  
GTAGGATACAGTATTGGCGCTAAAAGTAGCCAAGTGGCAGAATTAGCAGCTGTATA  
CAAGACTGTTCAAATTGCTCTAGAGCATAATATTACTGAATTTGTTATAGTCACAGA  
TTCCAATTATGTACGGAACAGTTTTGTGCGAGTATCTGCCTACTTGGAAAAGAAATAA  
CATGTTACGGTCCAATAACAAACCTGTGAAACATGCCAAATTGTTTGGTGCCATAGA  
TGAGTTAGTCAAAGTAATGATCTAACCATTTATTGGAAGAAAACCTAAAGGTCATTC  
TAAAACCCAGAACATGGACAAGGAAGGTAATGATCTAGCTGACAAGCTTGCCAAAC  
AAGGTGCCATAAATGGAGAAAGTGTGGACATAGATCATCTACTAGGAATGATACCC  
ATTGAAGCTGTCACTAGACACCAAGCTAAGGTACAGACTACAAATAATGTGGCTCA  
ATGGAGTCAAGAGTCTACAAGTGAGGATCTAATTAAGCCAAAAGGAAGATCCTA  
TACTTGGGATCTTCTATAAACACATTGAAGATCCTAGTAACAATCCCATATCGGAGG  
AGGATTATGCCCAAAAAGAAGACCTCCGATTACTAGTGAAAACCAAATCTCAATTT  
AGTATcCGAGATGGTTTATTAATGAGAACTTCAAAGAATGGGATTCAACAGTGGGTA  
GTTCCCCTATATTTAGAGGCCTAATGTTACAACATGCTCATGATGCACCTACAGCA  
GGTCACCGTGGTGAGAAGATTACCTACGAATTGCTACGTGATTATGCTTATTGGCCT  
CACATGTTGAAAGATGTCCAAACCTACTGTCAAGGTTGTCTGGTTTGTGCTCAGTTC  
CAACCTCAAGGTCCTACACATCGTGCCCCACTTCAGAAAAGGGTTCCTCATTGCCA  
TGGTCCGATATAACAAGTTGACTTTATAGGTCCTGTCAACAAGGTCATCCAGAGGAAAC  
AAATACATGTTAACGGTTACTTGTGTTTTTACCAAGTGGGTAGAGTGTGTTGCCGGCT  
CATAATAACACAGCCGAAACATGCGCCACTTTGCTTATTAACCATGTATTTTCCAGA  
TACGGACTACCGTTAAGGATTGATACGGACCGAGGATCGCATTTCATAAGTGAGGT  
AATGTCTAAGATGTGGAAGATCTTGGGTGTAAAACGGAAATTACACATTGCTTATCG  
TCCAGCATCAAGTGGATCAGTAGAGCGCTATAACCAGTCAATTGTTAACATCCTTAA  
GAAATTCGTTAAGGAATCAGGTAAGACTGGGACATGAAGTTGCCTTTAGTGCTCAT  
GGCTATCAGGGCCACTCCAAGTGCTGCTACTAAGATGTCACCCTTTGAGCTGATGAC  
AGGTAGGAAAATGGTACTTCCACAACATCTGTTGTATCGCACATCGGATCATAACCT  
GATCAATGCAGCCACGACACATCAGTATGTGGAGAACCTTCGTCAACATCTTCAACA  
TGCTTTTGTCTTCGCACAGAAGAATCTCGAGAAAGCAGCCGTAAGTAATAAAAACCTTA  
TTATGATCTCAAACCACCAAGAAGGAGTATGAGATcGGTGAcAAGGTGTATCTTTA  
CAATTTTGTCTCGGGACCGAGTAAAAGAAAAGAAGTTTCTTCCGTCATGGAAAGGTCC  
TTACACCATCATCGACAAAATCTCACCGGTGGTTTACAAAATAAAAATTGTTAAGAA

TGATGGTTTTACAGAAAAATGGGTTTCATGTCAATCAATTGCGTGCTTGTCATCCTAG  
GTCTCAATTACGAATACTGGATGGTGTATGCCGAAGAAGAGACTTAATAAGTATCTCA  
AGTGAATGTGATGATTGAATTGACATTGTGATATTTTCTCTCAGCTTACAGATCTTCA  
TAGCCTGAGCTTCTCCGCATTCAATTGGTCCTGCCAATCATAGCAGCATACCATGATC  
CTGGAGATTGTTCAATTAATGTTTAGCTAACTGAAGGATAATGAACCAGTCGCTATAT  
CATATATATATAGCATAGCTAGAGAATGGAAATATCAATTGAAGAGAATATGTACT  
CATATTATTTGTTTTTCTTAAATAGAAAGTGATTGACAGTCCAAACCAGGTTCGTTGAT  
TCGCAAAGACGATGATGACTACCAAAGACGCGGAGATCGTTTGGATGATCTGATCC  
TTGGTGTCCAGTTCAAGACGGAACCCGTGTATCGAACCAGGTCCCTCAACTGGAAGT  
CATGCTGCAGGATGATCCAGGATTCTACTGACGGGAGAATATATCCTAGGAGATCC  
TTGCGAGTTCGGATCCAAAGATATCCAGCGAAAGAAAATTCTACATCCCATTTTCAA  
CTGGGAAAGGCATGGATGTTATGTTGTCCATGTGAAGACAAAGTTTTATATCCGGAG  
ACCACTGATGAGTCCAATGATGTTCTGAAATGAACGATCAGTTTCATCAAGTGTCT  
AACTGCAAGCTTTGCTTTGATTGTGTTTGCTACACCCACTTTGGCTATTCAAGTCTTG  
TTCATAAAgACATTATGAGCCAAGGGGGGAAATTCAACGGAAAACCTTTGAGgTTTT  
ATAAAAAAAAAAAAAAGAGGCCACATCTTTTGGCGAATATGACATTTCTTCTGAACTT  
TTTCCAGATATGTCTAAGGTTGTACACCTGAATACCTGTGAAGAAGGGGGGGgATT  
aTGTCAGAACTATTGGGCCaAAAGGAATCAATTTTCATAGGCCTAAACATGTTATTTTA  
CAGATGTGTCTATGGGCATACTAGTAGCCATTTTGTCTATGTGCTAaAAGGTGAATAT  
AAGTTAATTCTTCTTTAATAAGAGACTTTCACAGAGAAAGGTTAGGAATGTTAGTAT  
AAACATTCTTCAGATCGTAAATTGTGGGGGTCTCAGACGCATATCAGTTAAAGATAG  
TGCCAGCCTGTTTGGGCCTGGTTGATTACaTTCTTTGCCTCCCTACAAGAGATTGGAA  
TTTCTAAAGAGTTTTTTTTTCTCTTTSTTCAATGAATAGAAaAAAGGGGCTTATTTAAA  
AGTTCCTTATGAAACCTTACTATTCATTGTAgTAATAATTAtTAAcAATGTTGTtATTAT  
ATTATTATATTATATGTAGCATCTATATGCCTACTTAATTGACTGATTTTAAGTAAAA  
TTTTATACATGTACTTTTATATATAiCCAAACTATATTCATTATATATTGTTTGAGTGT  
ACCCATTGAAATATATTGTTGTGTATTACTAATAATGGGGTTTTATATTTTAGTGCAA  
AGAATTAGGTGGTAtATGCCAATGTATATTCTTTTCTTATAAtGgTATGAAAAACCTCTG  
GGTcTAAACTTaaAACTAAAtFacCTCaCTTTAAaGgAaTtgGaaGAATGTTAATTGCTTTcGA  
ATAGATTGTTTCAGagGTAATTaCGAAGAGCAGACCTAAGGTCTGgcAGGgTGTAATt  
AGGATTGTCCAAAATTTTATATTtATGGTggTGTCCAAGGTCTcCGGTCAAAGGTCATA  
TCACTGCCTTATCTGTAGAAATTAGTGAAATTAAGTAAATGTTCCCAATTTTACAT  
AGAACAATAGTGCCCCCTGATGGTGTATTGTAGGGAAAAGTCTATGACCATATAGGG  
CATcTGACGTCATGCTACACGTCAgTAATCACGTGaTAGATCAAACCAAGCCCCTCC  
GCAGGGGGgaGATATAGgccGgGagCCcGGgAGaAGCTAGGGAGAGAGGAAAGAggAgA  
AATTCCAgAAgcaAGAGgGAtTCCAACAtCAAGGCCGTAAAGCaAAAtACaTTCCAAGGGTA  
TAGGTCAGAAGCTGAGGACGGCTGTCCcAGGAAACTGAACTAAAGAGAACCTGACT  
ATCCCTGGGGCTGAGCATTGACTGCTGACTTCTTCCAAAACAATAAATTTATATTG  
CTGGTAAAGTATACTTTcTATCTGTATATTAGGCAATTCATTAGCCACATATATATAT  
ATTCGGGTAAACCATTGAGTTCTTGTA

>Loki-Npa consensus sequence 5'LTR

TCAGATCGTAAATTGTGGGGTCTCAGACGCATATCAGTTTAGATGGTGCCAGTCTGT  
GTAGGGCTTGGTCGTTTAAATTCTTTACCTCCCTATGAGAGATTAGAATTTCTAAAG  
AGTTTTTTTTTCTTTTCTTCTTTCTTTAATGAATAGACAAAGGGGGTTATTTTAAAG  
TTCCTTATGAAACATTAATATTCATTGTGGTGATAATATTAGTAACAATGTTATGATA  
ATAATATTATATCATATGTAGCATCTATCTGCCTACTTAATTGACTGATTTTAAAGTA

GAATTTTATACGTGTACTTTTATATATCCAACCTATATTCATTATATATTGGTTGAGTG  
TACCCATTGAAATATATTCATGTGTACTACTAATAATGGGGTTTTTATATTTAAGTGC  
AAAGAATTAGGTGGTACATTCTAATGTATATTCCTTTCTTATAAGGTATGAAAAACC  
TCGGTCTTAAAACCTTCTACCTCACTTTTAAGGAATTGAGAAAGAATGTTAATTGCTT  
AAGTTAGACTGTTTTTCCAAGCCGTAATTGCAGGACCAGACCGATAGTTTGGCATG  
GTAGGATTAAGTATTGCCAAAAGTTTATATTTATGGGTCTTGTCCAGGGTCTTCGGTC  
TAAGGTCATATCACTGCCTTATCTTCAATAATTAGTAAAATTAATTAATGCTCCC  
AATTTTTACATAGAACAATAGCGCCCCCTGATGGTGATTGTGAGGGAAAGTCTATAA  
CCATATGGGGCATTGACGTCATGTTACACGTCAGTAATCACGTGTTAGATCAAACC  
AAGCCCACTCCGCAGGGGTATATAGATCAGGAGCACAAGTGAAGAGGGAGAGTAA  
AATTCATCAAGAGAGAGAATCGAACATCAAGGCAGTAAGCAAATACATTCCAGAG  
GGTATAGGTCAGAAGCTGAGGACGGCTGTCCTAGGAAACTGAATTAAGAGAACCT  
GACTATTCCTGGTGGCCGAGCATTGACTGCTGACTTCTTCCAAAACAATAAATTTA  
TATTGCTGGTAAAGTATACTTTATATCTGTATATTAGGCAATTCATCAGCCACATATA  
TATATATTCGGGTAAACCATTAAGTTCTTGTA

>Loki-Npa consensus sequence 3'LTR

TCAGATCGTAAATTGTGGGGTCTCAGACGCATATCAGTTAAAGATAGTGCCAGCCT  
GTTTGGGCCTGGTTGATTACaTTCTTTGCCTCCCTACAAGAGATTGGAATTTCTAAAG  
AGTTTTTTTTTCTCTTTSTTCAATGAATAGAAaAAAGGGGCTTATTTAAAAGTTCCTTA  
TGAAACCTTACTATTCATTGTAgTAATAATTAtTAAcAATGTTGTtATTATATTATTATA  
TTATATGTAGCATCTATATGCCTACTTAATTGACTGATTTTAAGTAAAATTTTATACA  
TGTACTTTTATATATAtCCAACTATATTCATTATATATTGTTTGTGAGTGTACCCATTGA  
AATATATTGTTGTGTATTACTAATAATGGGGTTTTTATATTTTAGTGCAAAGAATTAGG  
TGGTAtATGCCAATGTATATTCTTTTCTTATAtGgTATGAAAAACCTCTGGGTcTAAAC  
TTaaAACTAAAtTacCTCaCTTAAAGgAaTtgGaaGAATGTTAATTGCTTTcGAATAGATTG  
TTTCAGagGTAAATtaCGAAGAGCAGACCTAAGGTCTGgcAGGgTGTAATtAGGATTGTC  
CAAAATTTTATATTtATGGTggTGTCCAAGGTCTcCGGTCAAAGGTCATATCACTGCCT  
TATCTGTAGAAATTAGTGAAATTAAGTAAATGTTCCCAATTTTACATAGAACAAT  
AGTGCCCCCTGATGGTGATTGTAGGGAAAAGTCTATGACCATATAGGGCAtcTGACG  
TCATGCTACACGTCAgTAATCACGTGaTAGATCAAACCAAGCCCACTCCGCAGGGGG  
gaGATATAGgccaGGagCCcGGgAGaAGCTAGGGGAGAGAGGAAAGAggAgAAATTCCAgA  
AgcaAGAGgGAtTCCAACAtCAAGGCCGTAAGCaAAAtAcATTCCAAGGGTATAGGTCAG  
AAGCTGAGGACGGCTGTCCcAGGAAACTGAACTAAAGAGAACCTGACTATCCCTGG  
GGCTGAGCATTGACTGCTGACTTCTTCCAAAACAATAAATTTATATTGCTGGTAAA  
GTATACTTTcTATCTGTATATTAGGCAATTCATTAGCCACATATATATATATTCGGGT  
AAACCATTGAGTTCTTGTA

>Loki-Npa consensus sequence *smc-gag-pol* gene

TGTGAATTGGCGGAAAAATTAaaaaaAGCAAAATATGAAACCAGGCGAAGGGCTG  
ATAATGTTAAAAGTTACGAGAAGCCCTGCGTAAGATTGAAATTGAATCTGAAAAG  
GTTTCTAATGAGATGGCACAATTGTCTGCCCAAATGTCGGGTTATAGTGATAGAGAT  
ATTCAGAATAGAGATTTGATCAGTACTCTTAAAAGGGATCTGGATCAAATCTCTAAA  
GAATCATCAGAACATGAAAGGTCAAATTTGGCTCTAGAAGAAGAATGTGAAAAGTT  
GTTTACTGCCAATAGAAAACACAGGAGGAGTTGGATGGCCAGAATCTGGCATATC  
TGCAGTCTGTGCAGGAAAAACAGGCCAGCAGCGCAAAGGTTAAACCTTCTGGTTGG  
GAGGGGGTAAATGTCACTGAAACTGTTAGCAGCTCACACCCAGACTTTTGGTCTGTT  
AAACCTAACATTGTTAGACGAACCATAAAAGAGAGGTTTTTCAGATGTTGAAAGTGA

TTTCAGTGTCCCCTCAGAGGAAGAAGAACATTGTTTTACTAAGGAACGTTCTCTTCC  
TAAATTA AACCCATCTCACCTCATAAGCACTCCAAAAGTAAGTCCCATAGGAGTGA  
GAGGAGAGTCTATCAGCCTGTGTTTGATACAACAAAAGTCATTAAGTTTTTAAAAGA  
AACTGTGGGTCTATTTACTAAGAAAGGATCGCCTTCTGTAATTAATCATATAGAAAC  
TTATGAGGAGGCGATGATGACCCTAACTTAAGAAGTGACAAACAGAAAATTGAAT  
TCATTTTCATGGGTGTTTGAGCCAAAGCACAGGTACTTCTTTACTTCCCTACGTGATAT  
GGGTATAAATACCTGGTCTGAGGTCTGCTCAGAAATAAAGACAGAATTTGGTCCCTA  
TCGGTCAGCTACTGCTGCCAGGAGAGCCATTTTTACTTTGAAATGTCGGCCGAATCA  
GAGTCCCAGGGAATTTTTGTCAGTTCTCAAGAATGCCTATAGCCTGGCTGAGAAAGA  
TCCCAATTTTGAGAGCCATGAATTCATCCA ACTGTTTTATGATGCTTTGCCAAATAAA  
ATAAAAATTAGTCTTGCCCGGATTACCATCCCAGGAAA ACTCTGGATTGGCTACTG  
ACAGAGAGTACCACCCTTACGCTGTTTTACAAAATAGCGATGAATCCCAGGATAGG  
AGATTTAGGAAGCCAGCTGACGAGATAGCTGAGACTCATATTAAGGGATCAGGG  
ACAGTTTGAAGCCCCAAAAGGAGTTATGCTGAAGTGGTTAAGAACCCCACTACTC  
CTAAATTGAACAAGGCCAAACCCAATCCAGATAATAAGGTACCAAGTGTGATGAA  
GACCCCGGTGAAAAGCATCATTATGTAAAAGGCAGTTCCCTCCTTTCAGGAGATAT  
CAGAGAGGTTATTTAGGAAGTTCCAGCATGGCCAGATAAAGTCCAAAATGGTTCT  
GAATCAGAAGGTTCTGGTAAATCGCAGGCTTCTAATTTCCAAAACCCACCTCCCAAG  
GGTCATTGGAAAATAGAAGCAATTTATATGATCGAATGGACCAAATGCAGAACCA  
ATTTGGTGCTTTGGCAGAACAGCTGGAAAAGATATCCAACGTCCTCTCTGCTAAACC  
CAAAAATCCTTTTTTAGGGGAGGCTACTCCGGGCGAAAGCCCTCCACAATANCAAAT  
GGGGATAAACAGGTTAAAGTGTCCAATCATGCAAATACCAATGATTTACCAAGATG  
CAAAAGTGAGCAAATTAACCCAAGTGTGTATGCCTGAAAATAATTTAACCTTCCAA  
TGCCAAATGGCAAGGAGGAGGGGCGACATGCTTGTGATTTTATCTTGCAGCCCACCG  
AGTCTTCAGCCGTGCAAAGCCTGACAGGCACTCTTGCCTGTGAAGAAAAGAAGGG  
GGGTCGCGGGTCAAGATACACAGAGAGCAAACAAGCAGCTTCACTTGTATCCAAA  
ATATCTCTGTACCTTACATGAGATAGAACACAGGTATTTATTGATGTGGAATTGCA  
TAAGAATTTACCACAAATAATGGCTTTATTGGACACGGGTAGCCAAGTCACCATTTT  
ATCTCAGAAATATTTTCAACAAATCCAGGATTTATCTTCTGAGAAGTATAAGCTGAA  
AAGTTTTACAGCTAACCTTGTAAGTGTTCAGGCACTGCCCTTAAGGTCATAGGAAA  
AGCCTGGCTGAACTTCAACTTGGGGAATAAAGTAATTTGCCATCCCACACTTATAGT  
TGATTTGCCCTATGATCGCTTAATTATTGGCATAGATCTCCTTAAGAGATTAAATCCT  
ATTGTTGATTTTATCAATAAGGTTATCTGGTCCCAAGTGAGAATGCCATTA ACTAT  
GAGCATTCCAATCCTATCACAGTCGGCGTAACTGCCATGTGATTGAGGAAAGGCCG  
GACTCTATTGAGATCCATTTAGGAATAGCCAAGTCCAGATGTCTCCTTCTTACAG  
GCAACACCGACCTCCACCGTAGGTGGACAGGAGGATAACACCATATGTGTGTCCCC  
TGAAAGAGTTAGAGATGTTTGCTTGGAAAGGTGATGTTCTCACCATTACCTCCATCC  
AGAAAATACTGACTCTACTGGGTTCAAGTATCATGCGCAATTCCTAGCAGGGATTGA  
AAAGGTGAATGATGATGTGTTCTTCCCTTACAGGTTAATGACCTGGGAAGAACTAA  
AAGGGCTAAACTGGATTTACGCCAGGAGAACAGTTACATTAGTAGGGACCTACTAA  
AACAAATGGCCAATCCTAAAGTAATTAGGTATCCAAACCTCAGGATAACTGGGTC  
CATGATTTGGATGATGACTCAAACAGTCATAATATAATTGCTAAATGCATGTTATCC  
ATTTCTATTGGGGGTAAATCAGCCACTCATTTATTCCTGGTACTCAATGAGCCACGG  
TGTCATATTTACATTGGCAACGATATATTACATCGCTTTGCTATACATGTGGATTTGG  
TGAATTCACATTGTGGACTAGATTAAGGTAATCCATGTAGTTTCATGAGTGAAC  
ATGAAGCCCTCAAATCATCACAGATACTGCCATATGCAGTAAGTGTATTAGTACCAC

AAAATGTTATCATCCCTCCAGGTAATAAATTTCTGTTACCCATACAGGTATCAA  
AAGGCCAAAATTAAGGAATCCTGATGCATTAATATGCCTCTCAGACAGGATGCAA  
CAATTAGGAATTTAGTAAATCCTACACCCATGGTAAACATACATCCATTCAAACC  
CAAATAATTGTTAATAACAGTACGCCAAATGAAGTCCAATTGTCTAAAGACACCATT  
ATTGGTTTGGCATTAGATTCAGATTATTATACTTTTGGGTTTCAAATGTAATTATTG  
GCCTAATACCTGAACCATATCTCACCGAGGAGCAAATGGTTGAACAGACATTTTATT  
CTTCTCCTGAAGGATTGTTCCACCATTAACCTCAGTTTATCCTTTTAGTCCTGAAGAAGG  
TACCTGCAAGGTGGAGGAATCCTCCCTCACCTTTGATCATACTTAATGAGCAGGA  
AGCCGAGGAATATCGTGAGTGTACCGAAAAGGCTAGTAAGTCAAATCATGACCTCA  
CTGACAGGCTTGAGGAAGCCTATGAAATAGGTCAACCTGAAGTTTTTCCAGGATTC  
TGGAATGGTCCAGCAGCAAATATCTTTAGCCGATGGATGTTCTAGTGACCTAGAGC  
GCCAACAATTGAAAGAAGTCCTACTGGAGTTCAAGGATATCTTTGCTAAAGATTCTT  
ATGATTGTGGTCTAACAGACATACACATTGCTAGAATTCAGACTGATCCAAAGGCAC  
CTCCTGTTTATATCAAGCAATATCGTCTTCCACTAGCATGTTACGATTCGCTAGCGGA  
AATTATAAGGAATCTCAAGGAAAGAGGCGTTATAAGATCGGTGCACAGTTCTTATA  
ATAATCCTATTCTTGGTATCCTTAAACCGAATGGTCAATGGCGTTTATGTGCTGATCT  
CAGACAGCTCAATAAACGAGTATATATGTCCGGCTGGCCCGTGCCATATATTGACCA  
ATGCTTGGTACAAATGCAAGGCGCCAGGATCTTACCACATTGGATTGTGCTCAAGG  
GTATTGGACCATCAAGGTAAGTCCTGAAGACCAATATAAATTGGCATTACATTTGG  
TAAGGAGCAGTACACCTGGACCAGAATGCCGTTTGGTTACATAAACTCAGGTCATG  
AATTTGCTGTGTTCTTACATAAGGCTATGCCTGATGCAACTGAAAGAGGAAATTTAA  
CATACGTGGATGATATTTTGTGAAAAGTACCTCGTTTGA AAAACATGTACAAGAGA  
TTAGGCATGTGCTTAATCAGTTGAGAGAGGCAGGTGTTAAAATCTCTTTACAGAAAG  
CCCAATGGTGTGCTACCAAGGTCAACTTCTTGGGACATGAGGTTACTTCAGAAGGCC  
TCAATCCCCAAAAGAAGAAAGTGGAGGCTGTGATGAAGTCTAAGACACCCACCAAT  
GTCAGTGAAGTGAAGTCAATTTTGGGTATGATGAATTATTCACGTAAGTTTATTGAT  
AATTATGCGGAAATTAGTAAACCATTGTTGACATTGTTAAAGAAGGATGTACCATGG  
ATGTGGGGTGAGGATCAGGAACAAGCCATGAATGAGCTTAAAAGAAAACCTCACCCA  
AGCCCCATGCCTAACCTATCCAGAGGGGGGTA AACCTTTTATCTGGAGACTGGTTT  
TACAAACCTCAGTATCAGTGCGGTACTGTGTCAAAAACAAGACAAATTGAACAAAG  
TTATTGCTTATGCAAGTAAATCCCTGTCACCTGTAGAGGTA AAATTTAACGACTGTG  
ATAAAGCTTTATTAGCCACAGTCTGGGCCCTTCAAACCTTTAGAAAGTTACATTCAGG  
GTGAGAAAATCATCATTGAAACGGCCCAACCGCTACAGTATTTGCAAAGTGAC  
AAAATCAGGGATGGTAATTTGTCCAACAGCAGAATAACTGCTTGGACGTTATCCTTA  
CAAGGATGGCCATTGGAAGTCCGGTATAAACAAAATAAAAAGAGTCCAGTAGCTCA  
AGGACTTGCCGAACCTTCATGATTGTGCAGCTCCTTCTCCTACAGAAGAGCTATTAGA  
TGATTTCTTAGAGGAACAAATCTCTTCCCCTTACAAAGCATATGATGAGGAGTACTG  
TCCTCTACTCCCCTGTGTATACATTGATGGTTGTGCTTATCACACCACCGTAGGGGAT  
GAGAGAAAACCTAGTGGCTGGTATTGGAATCACTTGGACAAGTGAATTCCCAGATGT  
ATCAGTAGGATACAGTATTGGCGCTAAAAGTAGCCAAGTGGCAGAATTAGCAGCTG  
TATACAAGACTGTTCAAATTGCTCTAGAGCATAATATTACTGAATTTGTTATAGTCA  
CAGATTCCAATTATGTACGGAACAGTTTTGTGCGAGTATCTGCCTACTTGGAAAAGAA  
ATAACATGTTACGGTCCAATAACAAACCTGTGAAACATGCCAAATTGTTTGGTGCCA  
TAGATGAGTTAGTCAAAGTAATGATCTAACCATTTATTGGAAGAAAACCTAAAGGT  
CATTCTAAAACCCAGAACATGGACAAGGAAGGTAATGATCTAGCTGACAAGCTTGC  
CAAACAAGGTGCCATAAATGGAGAAAGTGTGGACATAGATCATCTACTAGGAATGA



TACCCATTGAAGCTGTCACTAGACACCAAGCTAAGGTACAGACTACAAATAATGTG  
GCTCAATGGAGTCAAGAGTCTACAAGTGAGGATCTAATTAAGCCAAAAGGAAGA  
TCCTATACTTGGGATCTTCTATAAACACATTGAAGATCCTAGTAACAATCCCATATC  
GGAGGAGGATTATGCCCAAAAAGAAGACCTCCGATTACTAGTGAAAACCAAATCTC  
AATTTAGTATTCGAGATGGTTTATTAATGAGAACTTCAAAGAATGGGATTCAACAGT  
GGGTAGTTCCCCTATATTTAGAGGCCTAATGTTACAACATGCTCATGATGCACCTA  
CAGCAGGTCACCGTGGTGAGAAGATTACCTACGAATTGCTACGTGATTATGCTTATT  
GGCCTCACATGTTGAAAGATGTCCAAACCTACTGTCAAGGTTGTCTGGTTTGTGCTC  
AGTTCCAACCTCAAGGTCCTACACATCGTGCCCCACTTCAGAAAAAGGGTTTCTCAT  
TGCCATGGTCCGATATAACAAGTTGACTTTATAGGTCCTGTCACAAGGTCATCCAGAG  
GAAACAAATACATGTTAACGGTTACTTGTGTTTTTACCAAGTGGGTTAGAGTGTTCG  
CGGCTCATAATAACACAGCCGAAACATGCGCCACTTTGCTTATTAACCATGTATTTT  
CCAGATACGGACTACCGTTAAGGATTGATACGGACCGAGGATCGCATTTCATAAGT  
GAGGTAATGTCTAAGATGTGGAAGATCTTGGGTGTAAAACGGAAATTACACATTGC  
TTATCGTCCAGCATCAAGTGGATCAGTAGAGCGCTATAACCAGTCAATTGTAAACAT  
CCTTAAGAAATTCGTTAAGGAATCAGGTAAGACTGGGACATGAAGTTGCCTTTAGT  
GCTCATGGCTATCAGGGCCACTCCAAGTGCTGCTACTAAGATGTCACCCTTTGAGCT  
GATGACAGGTAGGAAAATGGTACTTCCACAACATCTGTTGTATCGCACATCGGATCA  
TAACCTGATCAATGCAGCCACGACACATCAGTATGTGGAGAACCTTCGTCAACATCT  
TCAACATGCTTTTTCGTCACAGAAGAATCTCGAGAAAGCAGCCGTAAGTAATAA  
AACTTATTATGATCTCAAACCACCAAGAAGGAGTATGAGATCGGTGACAAGGTGT  
ATCTTTACAATTTTTCGTCGGGACCGAGTAAAAGAAAAGAAGTTTCTTCCGTCATGGA  
AAGGTCCTTACACCATCATCGACAAAATCTCACCGGTGGTTTACAAAATAAAAATTG  
TTAAGAATGATGGTTTTACAGAAAAATGGGTTTCATGTCAATCAATTGCGTGCTTGT  
ATCCTAGGTCTCAATTACGAATACTGGATGGTGATGCCGAAGAAGAGACTTAA

>Loki-Npa consensus sequence Smc-Gag-Pol polyprotein

CKSWPEFLYVICELAEKLLKAKYETRRRADNVKLLREALRKIEIESEKVSNEMAQLSAQ  
MSGYSRDIQNRDLSTLKRDLQISKESEHERSKLALEEECEKLFTANRKLQEELDGQ  
NLAYLQSVQEKQASSAKVKPSGWEGVNVETVSSSHPDFWSVKPNIVRRTIKERFSDVE  
SDFSVPSEEEHCFTKERSLPKLPISPHKHSKSKSHRSERRVYQPVFDTKVIKFLKETV  
GLFTKKGSPSVINHIETYEEAMMTLNLRSKQKIEFISWVFEPKHRYFFTSLRDMGINTW  
SEVVSEIKTEFGPYRSATAARRAIFTLKCRPNQSPREFLSVLKNAYS LAEKDPNFESHEFI  
QLFYDALPNKIKISLARDYHPRKTLDWLLESTTLYAVLQNSDESQDRRFRKPADEIAET  
HIKRDQGFQFEAPKRSYAEVVKNPSTPKLNKAKPNPDNKVPSVDEDPGEKHHYVQRQFP  
PFRRYQRGYFRKFQHGPKVQNGSESESGKSQASNSKNPPPKGHWKNRNLNLYDRMD  
QMQNQFGALAEQLEKISNVLSAKPKNPFLGEATPGESPPQ?QMGINRLKCPIMQIPMIYQ  
DAKVSCLTQVCMPENNLTLMPNGKEEGRHACDFILOPTESSAVQSLTGTLACEEKEGG  
SRVKIHREQTSSFTCHPKYLCTLHEIEHRYFIDVELHKNLPQIMALLDTGSQVTILSQKYF  
QQIQDLSSEKYKLSFTANLVSVSGTALKVIGKAWLNFNLGNKVICHPTLIVDLPYDRLII  
GIDLLKRLNPIVDFINKVIWSQVRMPINYEHSQSYSRNRNCHVIEERPDSIEIHFNRNSQVPD  
VSFLQATPTSTVGGQEDNTICVSPERVRDVCLEGDVLTIHLPENTDSTGFSHAQFLAG  
IEKVNDDVFFPLQVNDLGRTRAKLRLQENSYISRDLKQMANPKVIRYPNPQDNWV  
HDLDDDSNSHNIIAKCMLSISIGGKSATHLFLVLNEPRCHIYIGNDILHRFAIHVDLVNSTL  
WTRLKGNPCSFMSHEALKSSQILPYAVSVLVPQNVIIPPGTNNFLPIQVSKGQKLRNP  
DALICLSDRMQQLGISVNPTPMVNIHPFKTQIIVNNSTPNEVQLSKDTIIGLALDSDYYTF  
GFQNVIIGLIPEPYLTEEQMVETQFYSSPEGLFTINSVYPPSPEEGTCKVEESSLTFDHTLN

EQEAEYRECTEKASKSNHDLTDRLEEAYEIGQPEVFPGFLEMVQQQISLADGCSSDLER  
QQLKEVLLFEKDFIAKDSYDCGLTDIHIARIQTPKAPPVYIKQYRLPLACYDSLAEIIRNL  
KERGVIRSVHSSYNNPILGILKPNGQWRLCADLRQLNKRVMYMSGWPVPYIDQCLVQMQ  
GARIFTTLDCAQGYWTIKVSPEDQYKLAFTFGKEQYTWTRMPFGYINSGHEFAVFLHKA  
MPDATERGNLTYVDDILLKSTSFEEKHVQEIRHVLNQLREAGVKISLQKAQWCRTKVNFL  
GHEVTSEGLNPQKKKVEAVMKSKTPTNVSELRSFLGMMNYSRKFDINYAEISKPLLTLL  
KKDVPWMWGEDQEAMNELKRKLTQAPCLTYPEGGKPFYLETGFTNLSISAVLCQKQ  
DKLNKVIAYASKSLSPVEVKFNDCDKALLATVWALQNFRSYIQGEKIIIEETAHQPLQYLQ  
SDKIRDGNLSNSRITAWTSLQGWPLEVRYKQNKKSPVAQGLAELHDCAAPSPTEELL  
DFLEEQISSPYKAYDEEYCPLPCVYIDGCAYHTTVGDERKLVAGIGITWTSEFPDVS  
YSIGAKSSQVAELAAVYKTVQIALEHNITEFVIVTDSNYVRNSFVEYLPTWKRNNMLRS  
NNKPVKHAKLFGAIDELVKSNDLTIYWKKTGHSKTQNMDEKGNLADKLAKQGAIN  
GESVDIDHLLGMIPIEAVTRHQAKVQTTNVAQWSQESTSEDLIKSQKEDPILGIFYKHIE  
DPSNNPISEEDYAQKEDLRLLVKTKSQFSIRDGLLMRTSKNGIQQWVPTIFRGLMLQH  
AHDAPTAGHRGEKITYELLRDYAYWPHMLKDVTYCYCQGLVCAQFQPGPTHRPLQ  
KKGFSLPWSDIQVDFIGPVTRSSRGNKYMLTVTCVFTKWVECLPAHNNTAETCATLLIN  
HVFSRYGLPLRIDTDRGSHFISEVMSKMWKILGVKRKLHAIYRPAASSGVERYNQSIVNI  
LKKFVKESGKDWDMLPLVLMAIRATPSAATKMSPFELMTGRKMVLPQHLLYRTSDH  
NLINAATTHQYVENLRQHLQHAFafaqknlekaavsnktyydlkttkkeyeigdkvy  
YNFARDRVKEKKFLPSWKGPYTIIDKISPVYKIKIVKNDGFTEKWVHVNLQRACHPRS  
QLRILDGDAEEET\*

>Loki-Xla consensus sequence

ATGAGTGTACAGGAAGTGATAATGGTAATGACCCCGAGCAGTTGACCCGcAACATT  
GTTGAATTTTTGCAGCCACGGGTAAAATTTAGTCAAAGTGTGGACGATATGATTTAC  
GATTTGAAAAAGTATGTGAAGGAGGATATTGATGATATCTTTGCAATCAATGGTGTG  
GTTGAACGTTATTTAACAAGTATGACCTTAGCAACTAACAGTGCAGACAAAGAGAA  
AAGATTAATGTGTGCCCTACCTCCTGTTTTGTATGCTTTAATAGAGGTAGATACCCTA  
TCAAAGCTAGGAAAGTAGAGATAGAAAACTGAGATTTCAAATACATGAGACAGA  
ATCAAATGTCCAATTTTTGACATCTCAATTACATGAGATAGAATCAAATATCCAACA  
TATGAAcTCTGAGAGAAACCAATTAGAGATAGATATCTCAAACAAGGAAGCCTTTAT  
TAGGGACTTAGAACTGATGCTGAACATAGTCGCATAGCATACCGTAAGCTCAGAG  
AGGATTTTGAAGAATTACGGCAACAGTTGTTTAAAAATCAACAGTCAGGTGTATATG  
GTGTGGAGAGATCTCCTGATCCTCCAATAATCACTCCCAATATAAAAAATTGGGCAC  
CATATGCTCCTAGAGCCAAACCAATTAgTAATGGTGATTGAGAGGCACAAGaTGTTTT  
GaGCCGGTTGaCTGAAGCTTGCCAAGCTGTGACCACCTTATTAGGCAATCACAGAAC  
CAGGACCCCTATAGACTCCTGTCAAGACTCATCCCCAGAGAGGAATGAGCGACGTA  
AATCCCTTGTGTCCAATGTATCCTATAAAAGTTATGCTTCCAATCTTAATAACAAGTGG  
GTCTGAGAGTGATGAGAGGAAGCGGGATTCCAGTCCTGTCCAAGAAGGGGGAAAA  
ACACCATAAAAGGGGTTCAAAGGTA AAAATCCCCAATATCCAGGTGAAAAACAA  
AATTCTGCCAGCATAATTAATTCTTGAATACTGCTGTGCCAAAATTCTCTAAGAAA  
GGTTCTgCCCAAATAGCGACCCATTTAGAAATGTATGAGTCTACTATGGACTCTTTGG  
ACTTGTCTGAAGCAGACAGAATCAGGTTTCTTCCATGGGCCTTTGATGACAGATACC  
GTCATTACTTTTCCTCCTTTAGAGAGAGAGGAATCACCAAATGGCAGTCGGTCCTAC  
ATGAAGTTAAATTAGAATTTGGGCCATACCGAAATACCACTGCCGCAAAGAGAGAA  
ATTTATAGACTTACATGTCGGCCTAACCAAAGCCCCCGAGAATTTCTCTCTGTGCTC  
AAAAATGCCTATGGTTTGGCCTACAGAAACCCTGATTGGGAATCTATAGATTTTAAA

CAGTTGTTTTATGAGGCCTTACCAACCCAGATCAAATTAAGTCTTGCTCATGATCTG  
GATTTTGAAAACCCTCTAGAAAGACTGGTAACATCAGCAACcTTACTGTTTAAACATC  
AGTGAGGGCCAAAACCTTAAATGAAAGGAAAATTAATAAATTCCCAGAACACAATGT  
CGATGAGTCCAGGGTAAAACCTCATTAAATTTTGAGTCACAGCCAAAGAAAGTAC  
CTTCAGCCAATGGGTCTAATCAGCAGAACCGAAGACAACAGCCAAATCCCATACAA  
AACAAACCTCAAATCCTAAGGGATCAGACGGGAACAGCTCAGGTTCTGGAAGCCA  
GGACTACCGTCCTCGTTTCAACAAATTGAGCGACATTGTAAGTAAATTGTCTCAAGT  
TTCTGCACCAAAACAGTCTGAGGATTTTTTtAGATGTGAAGGCGGGACCCAGTTCCG  
CCAATTAAGAAACAGGGTCAGaTCCCTGTACGGAAATGGATACGGCAATACCAA  
ATATGGACAACGATCATATTTTGCATTGCACCGACCCAGGATTCAGCGGGGTCAAAG  
GGAAGTCTAATATTTTCAATTTATCTTACAGCCAAATAAGGACAATTCTCGTGATCCAA  
TGTCACTACAGCCCGTGTGTGAAATACCCCTCTGTTcAGTTcGTCCCAgTGGTGGAAATC  
CATGGGAACCCAGATGACCTGCAGGCAGAACCAGGAGGAGATAAATCCAAATATCC  
TGACGCTGCAGAAGGATCATTCTTTAAAACAACAGATGGCAAAACACTCCAATTTTC  
TCTGTAATCTCTTACAGTTAGACGGCCGGTACTTTATAGATACCTGTCTCCAAGATG  
GATGTGTCGGACCAATCCAAGGTTTATTGGATACCGGGTCTCAGGTCACTATCTTAT  
CTTTTAGCTACTTCCAACAGATCTTGGGGTCATCAAAAAAGAAACCGAGATTAACGG  
CATTGATGGCTCTTTGATAAGTGTGGGCGGTGACAGTTTACAGGTGAAAGGCACAT  
CCTGGCTGACATACAAGATTGGCAAAAAGATCCTTAGACATCCAACATTGATTGTAG  
AcCTcCCATATGATCGTtTGATCATTGGgATcGATtTGCTCAAGcGATTAATTCATAA  
TTGACTTTATAAATGAGGCAATTTGGACcCaAGTGAAAATTCCAATTGCTTTTGAGCG  
CTCCCACAATGCACAATCGCAACATAGTTGCCACATGATTGAAGAAAGGCCTAATTC  
TGTTGAAATCCATTTCCGGAACAGTCAAATACCAAATATATCAATCCTGAAAAACGG  
TAAACCTGAAGAAAGTGTTAATACTTCCCTCCACATCATTAAATCCAAAAGGACAA  
AATTGAAAAGATAATTTGGAGGATGATGTACTAACCATTTCTCTTAAAGGGGGAAA  
TCAGGAAGTTGCAGGCAAATGTGATTGCAAGGTGCATTTTATCCATCTCCCTAGGAA  
ACAAATCTACAGAACACGtTTTCAGTGTGCTAAAGGAACCACAATATCAAATGTATT  
TAGGAAATtACATTATACATCGATTTGCCATACAGGTTGTCTGATCAATAATGTTCTG  
TGGTCCAGATTACCAGGGAATCCAGAGGAATTCCAGGATAAAGAGCAAACCCTGAG  
ATGGGGaCAGCGAACACCCTATGCAGTGGATATCTTAGTCGCCGAAAAGGTAAAAA  
TCCCTGCGGGATGTAAATCATTCTTTTACCATTTCGAGTGAAGAAGGGGGCAAAGC  
TAAGAAATGCAGATGCATTATTTTGCTTATCCAATCGGATACAGCAATTTGGATTGA  
AGGTAACCGAATCCCATGATAAACATTCATCAGGATCCATTATACATGGTTATCC  
ATAACATGAGTCCTTATAGCATTACGTTACAAGAGGACACAATGATTGGCCTAGCCA  
TTGATTCAGAATATTACACTTTTGGGTTTCAAATGATATAATTGGATTGATACCTGA  
TGAATATCTAACAGAAGAACAAGTAGTGGATCAACATTGCTTCTCAACACCTGAGG  
GATTGTTcAGTGTTCACTCTGTTTATCCTTTTAGTCCTGAAGAAGGTACATGCTACAT  
cGACGAGACATCATTGATCTTCAACCATGAGATCAATAAAGGTGAGTATGAGTCATT  
CCAACAGGGGAAGGATCAGATATaTCACACCCCGGATGACCTGACCAGCAAGCTTG  
AAGAGGCTTATGAGATAAAaTCAACCcGAGATTTTcCCAGAATTTcAGGAgCGGGTGA  
AGAgCAACTCTCTATaGCaGATGCATGTtTGATGAATCAGAaCGACAACAGcTAAaGG  
AACTATTCTgGGAATTCAGGAAtATGTTCCGCAAGGACTCTTATGACTGTGGGGAAAC  
TAACCTGCATGTTACAAGAATCCAGACCGATCCAGATGCACCCCTGTGTTTGTAA  
ACAATACCGACTTCCGTTAGCGGCTTATGAGTCACTCTCGGAAATCGTTAAAAATCT  
GGAGAAAAAGGGTATCATCCGTCCAGTACACAGTTCTTTTAAATCATCCAATACTTGG  
AGTCCTTAAACCCAATGGTCAGTTTCGTCTTTGCTCAGACTTAAGACAGTTAAACAA

ACGAGTCTACATGTCTGGTTGGCCCGTACCATACATTGACCAATGCTTGGCGCAAAT  
CCAAGGATCTAAAATTTTCACaGCCCTTGATTGCGCACAAGGATATTGGACAATTAA  
AATAGATGAAAGGGATCAACACAAACTGGCCTTTACATTTGGAAAACAACAATATG  
CCTGGACCCGATTACCTTTTCGGGTATATCAATGCAGGCCATGAGTTTGCTGTATTCAT  
GCACAAAGCAATGCCTGATGCTGCTGAACGAGGTACATTATCTTATGTGGATGACAT  
ATTGATAAAAAGTACAACTTTTGAAGAGCATATTGCAGAACTAAAATATGTATTTAA  
ACTTTCTTTACAGAAGGCCAATGGTGCCGATCTAAGGTAAATTTCTAGGACATGA  
AGTTACTGCcGAAGGAATCAAtCCACAGAAAAAGAAAGTGGAAGCAATAAAGAACA  
CGAAATCTCCTACAAATCTCAAGGAGCTGAGATCATTCTGGGTATGATGAACTATT  
CACGTAAGTTCATAGACAACCTATGCgGAAATTACAAAACCTCTTTTGCAGTTGCTGA  
AGAAAGGAGCAAAATGGGAATGGAATGAGTGTACGAACAAGCAGTATCTGAACTT  
AAAATAAGCTTATCCAGGCTCCATGCCTTGCTTATCCAGAAGGTGGAAAACCCCTC  
TATGTCGAAACAGGTTTTTACCGACAAAAGTGTaAGTGCGGTTCTTTTCCAAAACAA  
GAAAAACTGAATAAAAATAATTGCTTATGCCAGCAAGTCATTATCaCCAGTTGAAATa  
AAATTTAATAACTGTGAAAAAGCGTTATTAGCaACTGTATGGGCTTTGCAATATTTCA  
GGAGCTTTATTTCAGGGTGAAAAGATTATTGTGGAACTGCACATCAATCACTACAAT  
ATTTACAGAGTGGTTCGGTTAAAGGATGGAAACCTGTCAAACAGTAGGATAACTGCA  
TGGACAATGTCCCTTATGGGATGGCCATTGGAGATCAGATATAAACAGGATACTAA  
AAACccAGTTGCTCAAGGATTAGCTGAACTCCATGATTGtAtTAATGTcGAACATAAaG  
ATGAGTCACCAGAAAATGACTTTcTGGAGGAACAATCAfTATCTCCATATAAaTCATA  
TGAAGAGGAATACTGCAAATCATTACCATGTGTATATGTTGATGGCTGTTCTTTCCA  
CACAGAAGAAGCTGAAAAGATGCTGGTTGCAGGTATCGGGATCGTGTGGAATAATA  
TATTTCCAGAGATATCCATAGGATACAAaATTGGTCCCAAAGTAGCCAGGTCGCAG  
AGCTTGCCGCTGTGTACAAAGCAaTACAAATGGCTATTGAATATGATCTTAAAGAAT  
TTGTTTTAATTACAGATTCcGATTATGTTTCGGAACAGfTTTGTGGAATAcTTTCCCGGA  
TGAAAAGATCCAACATGfTGAGAAGTAACAAGAAACCAGTCAAACATGGTAAGCT  
GTTCTGCAAAATCGATGAATTGGTTACTACCTACGGTCTTACTATCTATTGGAAGAA  
GGTAAGGGGTCATTCAAAGCATCCAGGCGCAGATAAAGATGGGAACGACCTAGCGG  
ATCCCTCGCCAAGAAAGCAGCCATTGATGGAGAGATCTTAGATATCGATGACCTCA  
TGGGAACTATCCAAGTGGATGTCACAACCAGGGGACAGGCCCAAAGGAGTCTCAA  
CCTAATGTGGCAATGTGGAGCCAAGATTCCCCTAGCGAAGATCTCATTGAGAGCCA  
GAAAGGGGATCCTATTATTGGTTTATTTTATAAATATATTCAAATCCACAaGATCAT  
CCATAACTATGGAAGACTGTGCTGATAATGAGGAGTTACGCGTTTTAATGAAAGGT  
GAGTCCCAATTCTCATTACAGGATGGATTGTTGATACGAACCTCGAAAAACGGTATC  
ACACAATGGGTAGTACCCGCAGCATATCGGGGTTTGATGTTACAACATGCCCATGAT  
GCCCCGACAGCTGGTCACCGAGGAGAGAAAATAACATATGAGTTGTTGAGGGACTA  
TGCTTACTGGCCACACATGTTACAAGATGTCAGGACATATTGTCAAGGATGTTTGGT  
ATGTCCTCAGTTCCAACCACAAGGACCCAATCATCGGGCACCCTGATGAAAAGAG  
GAATATCCATGCCATGGTCAGATATTCAGATTGATTTCATTGGACCAGTAACAACCT  
CCTCAAAGGAAACCGATACATGCTAACTGTAACCTGTTTGTTCACAAAATGGGTAG  
AATGTCTGCCATGTAAAACATGCAGTTCTAGTGTATGCGCATCACTGCTCATTAACC  
ATATATTTTCCAGATTTGGTCTTCCCCAGCGTATTGAATCCGACCGTGGAAGTCACTT  
CACCAGTGAAGTgATGACCAAGATGTGGGAAATTCTAGGAGTAAAAGGAAGCTAC  
ACATAGCTTACCGACCAGCTTCTAGTGGTGGAGTAGAGCGTTACAATCAATCCATAG  
TAAACATTTTGA AAAAGTTTGTCAAGGAATCTGGTAAAGACTGGGATGTCAAGTTGC  
CATTGGTTCTCATGGCTATTAGAGCCACTCCAAGTGCAGCAACCAAACCTTTCTCCAT

TTGAGATGATTACAGGTAGAAAAATGGTGTACCTCAACATTTACTTTACAGGACCA  
CAGATCACAATTTGATGAATGCAACaACTGCACATCAATATgTGGAAAAcTTACGcAA  
GCATCTACAACATGCTTTTGCATTTGCCAAAGAAATATTGAaAAAGCTGCAGTAAG  
TACGAAAACGTACTATGATCTAAAAACAACCTCAAAGGGAATATCAGGTGGATGACA  
AAGTTTATCTTTATAACTTTGCCAGgGATCAGGTAAAGGAAAGGAAATTCCTACCTT  
CATGGAAAGGTCCATATATAATCACTGATAAATTATCTCCTGTGGTTTATAAAGTTA  
AAATTCCTAAGGGGGATGATTTTGTGAAAAATGGGTGCATATTAACCAATTACGTG  
TTTGTATCCTAGCTCACAGCTTCGGAAAAATAGAGCAAGTCGAGAGCTGAGTGGTAA  
AGATCTGGAAGTTCGGTTAAAGTGCAAAGATGCCATCCAAGATGATCGCTATCTTA  
TATGCAGTCCTGATCTTGGGGAAAGAGTTCCATGCTGAGCCGATTGTGATGCCAGGT  
CCATCATCCGGGATCATGCTACAGGATACGGCAGGATTCATCATGACCAACAAGAG  
GATCCTATCCCAGAAGGTTTATATGAGCCTAGATCCACGTTGTGTATCGAAAGACA  
AGTCAACGTATCCAATATTCGATCACCGGAGATTCAAACCTGGTACCAGCTACATAT  
CGAATATTCACAAGAGCGGGTTACTCAGATCCTGGAGCAAACCCGGAAAACTTTGA  
CCAGAGAGCCCTTTTCTTCAAACCAAAGACCAAAGCGGTTCAATTTCTGCCATTGTG  
CTGCTATAATCTTTGCGGTAGTAGGAAGTGTGTTTGAACCGGTGTAACAATCGCTA  
ATTCTGTATCCCTTAAAACCATGGAATCTGAGATTAGTTCATTAAGACTAATTTAC  
AACATATTCATGCAGAGATGGAAAGACAAAAGAAAGATTTAACAGACTTGTATGCC  
GTTGTGGAAGACACTGTCGTTACCACGAACTTACACTTTAAATTGTTAGACCGCTCA  
ATAGATCTACACCAAGGTATGAGCAGTTTAAAGCAAGAACTTATTTTGTAAAAGAA  
CGTATCGACTTTCAACTTCAGGTTTTCCATGACGAGGAGCAAAGTGGGATGCAAGAC  
CTAAGGGAAGATGTTACAAAGTGTGATGGAGAAaAGTAGAGGATATCCAATGAA  
CTTAGCATTTAATATGGGAGTTGCCATACCATTATACATCGATCCCATTAATATGGA  
AATTTGCTTTTTACTATCAATCCCAATGGTTAATAGGAACAATATATTTCAAATGAA  
GAAAATCCACAATGTAGGTACGTGGAgAGACAATTCACATTAATAATTCAAATCC  
TGACATTGTAGCATATCAATCTTGGAACCCGGACTGGCTAGCTGTTCCCTATTCTGGA  
TAATTGTGCAACATTCCGGGATAATAATTTTCAATGTGAAGGCGATCCGTTCAATTA  
TGATGCAACTAACGCTTTGTGCGGACTTGAATTTGAGAAACAtGGATCAGAGAAATG  
CCAGGaGATCTTGTCTAAAATTGAGGAGAAAGACTGGGTAAATGCAATTTTAATAAA  
AGACAAATGGCTCGTTAGTACTCGTCTGCCAGACCTGACTGTTTTTTCTAACGACCA  
CATTATGGCGAAAGTTATTGCTTTACCTTCCAGTGTATCGATCATCAAGGTACCCCT  
AATTCAGAGTTGTGATTGGAAATCGCACCCATATCCTGTAATATTGAAGACATT  
GAAGGAGAGGTGGAAAGCATTGATGCATTCCAGAATCAGGAAATCACTATAAGTCC  
GGATTTAAAATTTTTGTTNGACAATAAGCCAGACATACCGTTCGTATGGTTATTAA  
AAAGCATAATGTTACCATGGATAccCCACAATACTCATCAACCGACGACGAGATATT  
GTTCCCTCTGtTGGTCATGGGGGAAAATTACATATGGAGCATTTTGTTCGCAGTT  
ATAGTAGGGTGGTTAACTGTAATCACCGTCTTGGCAATCCGTTGGATGAAGTTCATC  
AAAAGAACTCTAGATAAGCTATGGCTTAAATCTCGTCGATTGAGTCTACATAATGAG  
TATGATGAAGGAAGAGTTTGA

>Loki-Xla consensus sequence *smc-gag-pol* gene

ATGAGTGTACAGGAAGTGATAATGGTAATGACCCCGAGCAGTTGACCCGCAACAT  
TGTTGAATTTTTGCAGCCACGGGTAAAATTTAGTCAAAGTGTGGACGATATGATTTA  
CGATTTGAAAAGTATGTGAAGGAGGATATTGATGATATCTTTGCAATCAATGGTGT  
GGTTGAACGTTATTTAACAAGTATGACCTTAGCAACTAACAGTGCAGACAAAGAGA  
AAAGATTAATGTGTGCCCTACCTCCTGTTTTGTATGCTTTAATAGAGGTAGATACCT  
ATCAAAGCTAGGAAAGTAGAGATAGAAAACTGAGATTTCAAATACATGAGACAG

AATCAAATGTCCAATTTTTGACATCTCAATTACATGAGATAGAATCAAATATCCAAC  
ATATGAACTCTGAGAGAAACCAATTAGAGATAGATATCTCAAACAAGGAAGCCTTT  
ATTAGGGACTTAGAACTGATGCTGAACATAGTCGCATAGCATAACCGTAAGCTCAG  
AGAGGATTTTGAAGAATTACGGCAACAGTTGTTTAAAAATCAACAGTCAGGTGTAT  
ATGGTGTGGAGAGATCTCCTGATCCTCCAATAATCACTCCCAATATAAAAAATTGGG  
CACCATATGCTCCTAGAGCCAAACCAATTAGTAATGGTGATTTCAGAGGCACAAGAT  
GTTTTGAGCCGGTTGACTGAAGCTTGCCAAGCTGTGACCACCTTATTAGGCAATCAC  
AGAACCAGGACCCCTATAGACTCCTGTCAAGACTCATCCCAGAGAGGAATGAGCG  
ACGTAAATCCCTTGTGTCCAATGTATCCTATAAAAGTTATGCTTCCAATCTTAATA  
AGTGGGTCTGAGAGTGATGAGAGGAAGCGGGATTCCAGTCCTGTCCAAGAAGGGG  
GAAAAACCCATAAAAGGGGTTCAAAGGTAAAAATCCCAATATCCAGGTGAAA  
AACAAAATTCTGCCAGCATAATTAATTCTTGAATACTGCTGTGCCAAAATTCTCTA  
AGAAAGGTTCTGCCAAATAGCGACCCATTTAGAAATGTATGAGTCTACTATGGACT  
CTTTGGACTTGTCTGAAGCAGACAGAATCAGGTTTCTTCCATGGGCCTTTGATGACA  
GATACCGTCATTACTTTTCTCCTTTAGAGAGAGAGGAATCACCAATGGCAGTCGG  
TCCTACATGAAGTTAAATTAGAATTTGGGCCATACCGAAATACCACTGCCGCAAAGA  
GAGAAATTTATAGACTTACATGTCGGCCTAACCAAAGCCCCGAGAATTTCTCTCTG  
TGCTCAAAAATGCCTATGGTTTGGCCTACAGAAACCCTGATTGGGAATCTATAGATT  
TAAACAGTTGTTTTATGAGGCCTTACCAACCAGATCAAATTAAGTCTTGCTCATG  
ATCTGGATTTTGAAAACCCTCTAGAAAGACTGGTAACATCAGCAACCTTACTGTTA  
ACATCAGTGAGGGCCAAAACCTTAAATGAAAGGAAAATTAATAAATCCCAGAACAC  
AATGTCGATGAGTCCAGGGTAAAACCTCATTTAAATTTTGAGTCACAGCCAAAGAA  
AGTACCTTCAGCCAATGGGTCTAATCAGCAGAACCGAAGACAACAGCCAAATCCCA  
TACAAAACAAACCTCAAATCCTAAGGGATCAGACGGGAACAGCTCAGGTTCTGGA  
AGCCAGGACTACCGTCCTCGTTTCAACAAATTGAGCGACATTGTAAGTAAATTGTCT  
CAAGTTTCTGCACCAAACAGTCTGAGGATTTTTTTTAGATGTGAAGGCGGGACCCAG  
TTCCGCCAATTAAGAAACAGGGTCAGATCCCTGTACGGAAATGGATACGGCAAT  
ACCAAATATGGACAACGATCATATTTTGCATTGCACCGACCCAGGATTCAGCGGGGT  
CAAAGGGAAGTCTAATATTTTCAATTTATCTTACAGCCAAATAAGGACAATTCTCGTGA  
TCCAATGTCACTACAGCCCGTGTGTGAAATACCCTCTGTTTCAGTTCGTCCCAGTGGT  
GGAATCCATGGGAACCCAGATGACCTGCAGGCAGAACCAGGAGGAGATAAATCCA  
AATATCCTGACGCTGCAGAAGGATCATTCTTTAAACAACAGATGGCAAACACTC  
CAATTTTCTCTGTAATCTTTACAGTTAGACGGCCGGTACTTTATAGATACCTGTCTC  
CAAGATGGATGTGTTCGGACCAATCCAAGGTTTATTGGATACCGGGTCTCAGGTCCT  
ATCTTATCTTTAGCTACTTCCAACAGATCTTGGGGTCATCAAAAAAGAAACCGAGA  
TTAACGGCATTGATGGCTCTTTGATAAGTGTGGGCGGTGACAGTTTACAGGTGAAA  
GGCACATCCTGGCTGACATAAAGATTGGCAAAAAGATCCTTAGACATCCAACATT  
GATTGTAGACCTCCCATATGATCGTTTGATCATTGGGATCGATTTGCTCAAGCGATT  
AAATCCATAATTGACTTTATAAATGAGGCAATTTGGACCCAAGTGAAAATTCCAAT  
TGCTTTTGGAGCGCTCCCACAATGCACAATCGCAACATAGTTGCCACATGATTGAAGA  
AAGGCCTAATTCTGTTGAAATCCATTTCCGGAACAGTCAAATACCAAATATATCAAT  
CCTGAAAACGGTAAACCTGAAGAAAGTGTTAATACTTCCTTCCACATCATTAATAT  
CCAAAAGGACAAAATTGAAAAGATAATTTTGGAGGATGATGTACTAACCATTTCTCT  
TAAAGGGGGAAATCAGGAAGTTGCAGGCAAATGTGATTGCAAGGTGCATTTTATCC  
ATCTCCCTAGGAAACAAATCTACAGAACACGTTTTTCAGTGTGCTAAAGGAACCACA  
ATATCAAATGTATTTAGGAAATTACATTATACATCGATTTGCCATACAGGTTGTCTG

ATCAATAATGTTCTGTGGTCCAGATTACCAGGGAATCCAGAGGAATTCCAGGATAA  
AGAGCAAACCCTGAGATGGGGACAGCGAACACCCTATGCAGTGGATATCTTAGTCG  
CCGAAAAGGTAAAAATCCCTGCGGGATGTAAATCATTCTTTTACCCATTCGAGTGA  
AGAAGGGGCAAAGCTAAGAAATGCAGATGCATTATTTTGCTTATCCAATCGGATA  
CAGCAATTTGGATTGAAGGTAAAACCGAATCCCATGATAAACATTCATCAGGATCC  
ATTATACATGGTTATCCATAACATGAGTCCTTATAGCATTACGTTACAAGAGGACAC  
AATGATTGGCCTAGCCATTGATTGAGAATATTACACTTTTGGGTTTCAAATGATAT  
AATTGGATTGATACCTGATGAATATCTAACAGAAGAACAAGTAGTGGATCAACATT  
GCTTCTCAACACCTGAGGGATTGTTCACTGTTCACTCTGTTTATCCTTTTAGTCCTGA  
AGAAGGTACATGCTACATCGACGAGACATCATTGATCTTCAACCATGAGATCAATA  
AAGGTGAGTATGAGTCATTCCAACAGGGGAAGGATCAGATATATCACACCCCGGAT  
GACCTGACCAGCAAGCTTGAAGAGGCTTATGAGATAAATCAACCCGAGATTTTCCC  
AGAATTTTCAGGAGCGGGTGGAAAGAGCAACTCTCTATAGCAGATGCATGTTCTGATG  
AATCAGAACGACAACAGCTAAAGGAACTATTCTGGGAATTCAGGATATGTTTCGCC  
AAGGACTCTTATGACTGTGGGGAAACTAACCTGCATGTTACAAGAATCCAGACCGA  
TCCAGATGCACCCCTGTGTTTGTAAACAATACCGACTTCCGTTAGCGGCTTATGA  
GTCACTCTCGGAAATCGTTAAAAATCTGGAGAAAAAGGGTATCATCCGTCCAGTAC  
ACAGTTCTTTAATCATCCAATACTTGGAGTCCTTAAACCCAATGGTCAGTTTCGTCT  
TTGCTCAGACTTAAGACAGTTAAACAAACGAGTCTACATGTCTGGTTGGCCCGTACC  
ATACATTGACCAATGCTTGGCGCAAATCCAAGGATCTAAAATTTTCACAGCCCTTGA  
TTGCGCACAAGGATATTGGACAATTAATAATAGATGAAAGGGATCAACACAAACTGG  
CCTTACATTTGGAAAACAACAATATGCCTGGACCCGATTACCTTTCGGGTATATCA  
ATGCAGGCCATGAGTTTGCTGTATTCATGCACAAAGCAATGCCTGATGCTGCTGAAC  
GAGGTACATTATCTTATGTGGATGACATATTGATAAAAAGTACAACTTTTGAAGAGC  
ATATTGCAGAACTAAAATATGTATTAATACTTTCTTTACAGAAGGCCCAATGGTGCC  
GATCTAAGGTAAATTTCTAGGACATGAAGTTACTGCCGAAGGAATCAATCCACAG  
AAAAAGAAAGTGGAAGCAATAAAGAACACGAAATCTCCTACAAATCTCAAGGAGCT  
GAGATCATTCTGGGTATGATGAACTATTCACGTAAGTTCATAGACAACACTATGCGGA  
AATTACAAAACCTCTTTTGCAGTTGCTGAAGAAAGGAGCAAAATGGGAATGGAATG  
AGTGTACGAACAAGCAGTATCTGAACTTAAACTAAGCTTATCCAGGCTCCATGCC  
TTGCTTATCCAGAAGGTGGAAAACCCTTCTATGTGCAACAGGTTTTACCGACAAAA  
GTGTAAGTGCGGTTCTTTTCCAAAAACAAGAAAAACTGAATAAAATAATTGCTTATG  
CCAGCAAGTCATTATCACCAGTTGAAATAAAATTTAATAACTGTGAAAAAGCGTTAT  
TAGCAACTGTATGGGCTTTGCAATATTTTCAGGAGCTTTATTTCAGGGTGAAAAGATTA  
TTGTGGAAACTGCACATCAATCACTACAATATTTACAGAGTGGTCGGTTAAAGGATG  
GAAACCTGTCAAACAGTAGGATAACTGCATGGACAATGTCCCTTATGGGATGGCCA  
TTGGAGATCAGATATAAACAGGATACTAAAAACCCAGTTGCTCAAGGATTAGCTGA  
ACTCCATGATTGTATTAATGTGCAACATAAAGATGAGTCACCAGAAAATGACTTTCT  
GGAGGAACAATCATTATCTCCATATAAATCATATGAAGAGGAATACTGCAAATCATT  
ACCATGTGTATATGTTGATGGCTGTTCTTTCCACACAGAAGAAGCTGAAAAGATGCT  
GGTTGCAGGTATCGGGATCGTGTGGAATAATATATTCCAGAGATATCCATAGGATA  
CAAATTTGGTCCCAAAGTAGCCAGGTTCGACAGAGCTTGCCGCTGTGTACAAAGCAA  
TACAAATGGCTATTGAATATGATCTTAAAGAATTTGTTTTAATTACAGATTCCGATTA  
TGTTTCGGAACAGTTTTGTGGAATACTTTCCCGGATGGAAAAGATCCAACATGTTGAG  
AAGTACAAGAAACCAGTCAAACATGGTAAGCTGTTCTGCAAAATCGATGAATTGG  
TACTACCTACGGTCTTACTATCTATTGGAAGAAGGTAAGGGGTCAATCAAAGCATC

CAGGCGCAGATAAAGATGGGAACGACCTAGCGGATTCCCTCGCCAAGAAAGCAGCC  
ATTGATGGAGAGATCTTAGATATCGATGACCTCATGGGAACTATCCAAGTGGATGTC  
ACAACCAGGGGACAGGCCAAAAGGAGTCTCAACCTAATGTGGCAATGTGGAGCCA  
AGATTCCCCTAGCGAAGATCTCATTGAGAGCCAGAAAGGGGATCCTATTATTGGTTT  
ATTTTATAAATATATTCAAAATCCACAAGATCATCCCATAACTATGGAAGACTGTGC  
TGATAATGAGGAGTTACGCGTTTTAATGAAAGGTGAGTCCCAATTCTCATTACAGGA  
TGGATTGTTGATACGAACCTCGAAAAACGGTATCACACAATGGGTAGTACCCGCAG  
CATATCGGGGTTTGATGTTACAACATGCCCATGATGCCCCGACAGCTGGTCACCGAG  
GAGAGAAAATAACATATGAGTTGTTGAGGGACTATGCTTACTGGCCACACATGTTAC  
AAGATGTCAGGACATATTGTCAAGGATGTTTGGTATGTCCTCAGTTCCAACCACAAG  
GACCCAATCATCGGGCACCCTGATGAAAAGAGGAATATCCATGCCATGGTCAGAT  
ATTCAGATTGATTCATTGGACCAGTAACAACCTCCTCAAAGGAAACCGATACATG  
CTAACTGTAACCTGTTTGTTCACAAAATGGGTAGAATGTCTGCCATGTAACATGC  
AGTTCTAGTGTATGCGCATCACTGCTCATTAAACCATATATTTTCCAGATTTGGTCTTC  
CCCAGCGTATTGAATCCGACCGTGGAAGTCACTTCACCAGTGAAGTGATGACCAAG  
ATGTGGGAAATTCTAGGAGTAAAAGGAAGCTACACATAGCTTACCGACCAGCTTC  
TAGTGGTGGAGTAGAGCGTTACAATCAATCCATAGTAAACATTTTGAAAAAGTTTGT  
CAAGGAATCTGGTAAAGACTGGGATGTCAAGTTGCCATTGGTTCTCATGGCTATTAG  
AGCCACTCCAAGTGCAGCAACCAAACCTTCTCCATTTGAGATGATTACAGGTAGAAA  
AATGGTGTACCTCAACATTTACTTTACAGGACCACAGATCACAATTTGATGAATGC  
AACAACTGCACATCAATATGTGGAAAACCTACGCAAGCATCTACAACATGCTTTTGC  
ATTTGCCCAAAGAAATATTGAAAAGCTGCAGTAAGTACGAAAACGTAATGATC  
TAAAAACAACCTCAAAGGGAATATCAGGTGGATGACAAAGTTTATCTTTATAACTTTG  
CCAGGGATCAGGTAAAGGAAAGGAAATTCCTACCTTCATGGAAAGGTCCATATATA  
ATCACTGATAAATTATCTCCTGTGGTTTATAAAGTTAAAATTCCTAAGGGGGATGAT  
TTTGTGAAAATGGGTGCATATTAACCAATTACGTGTTTGTATCCTAGCTCACAG  
CTTCGGAAAATAGAGCAAGTCGAGAGCTGA

>Loki-Xla consensus sequence Smc-Gag-Pol protein

MSVTGSDNGNDPEQLTRNIVEFLQPRVKFSQSVDDMIYDLKKYVKEDIDDIFAINGVVE  
RYLTSMTLATNSADKEKRLMCALPPVLYALIEVDTLKARKVEIEKLRFOIHETESNVQF  
LTSQLHEIESNIQHMNSERNQLEIDISNKEAFIRDLETDAEHSRIA YRKLREDFEELRQQLF  
KNQQSGVYGVERSPPPIITPQYKNWAPYAPRAKPI SNGDSEAQDVLSRLTEACQAVTT  
LLGNHRTRTPIDSCQDSSPERNERRKSLVSNVSYKSYASNLNTSGSESDERKRDS SPVPR  
RGKNTHKRGSKGKNPQYPGEKQNSASIIFLNTAVPKFSKKGSAQIATHLEMYESTMDS  
LDLSEADRIRFLPWFDDRYRH YFSSFRERGITKWQSVLHEVKLEFGPYRNTTAAKREIY  
RLTCRPNQSPREFLSVLKNA YGLAYRNPDWESIDFKQLFYEALPTQIKLSLAHDLDFENP  
LERLVTSATLLFNISEGQNLNERKIKKFPEHNVD ESRVKPHLNFESQPKKVPSANGSNQQ  
NRRQQPNPIQNKPQNPKGSDGNSSGSGSQDYRPRFNKLSDIVSKLSQVSAPKQSEDFRC  
EGGTQFRQLKETGSDPCTEMDTAIPNMDNDHILHCTDPGFSGVK GKSNISFILQPNKDNS  
RDPMSLQPVCEIPSVQFVPVVE SMGTQMTCRQNQEEINPNILTLQKDHSLKQQMAKHSN  
FLCNLLQLDGRYFIDTCLQDGC VGPQQLLDTGSQVTILSFSYFQQILGSSKKKPRLTAFD  
GSLISVGGDSLQVKGTSWLTYKIGKKILRHPTLIVDLPYDR LIIGIDLLKRLNSIIDFINEAI  
WTQVKIPIAFERSHNAQSQHSCHMIEERPNSVEIHF RNSQIPNISILKNGKPEESVNTSFHII  
NIQKDKIEKIILEDVLTISLKGGNQEVAGKCDCKVHF IHLPRKQIYRTRFQCAKGTTISN  
VFRKLHYTSICHTGCLINNVLWSRLPGNPEEFQDKEQTLRWGQRTPYAVDILVAEKVKIP  
AGCKSFLLP IRVKKGQKLRNADALFCLSNRIQQFGLKVKPNP MINIHQDPLYMVIHNMS



PYSITLQEDTMIGLAIDSEYYTFGFQNDIIGLIPDEYLTEEQVVDQHCFSTPEGLFSVHSVY  
PFSPEEGTCYIDETSLIFNHEINKGEYESFQQGKDQIYHTPDDLTSKLEEAYEINQPEIFPEF  
QERVEEQLSIADACSDSERQQLKELFWFQDMFAKDSYDCGETNLHVTRIQTDPDAPP  
VFKQYRLPLAAYESLSEIVKNLEKKGIIRPVHSSFNHPILGVLKPNGQFRLCSDLRQLNK  
RVYMSGWPVPYIDQCLAQIQGSKIFTALDCAQGYWTIKIDERDQHKLAFTFGKQQYAW  
TRLPFGYINAGHEFAVFMHKAMPDAAERGTLVSYVDDILIKSTTFEEHIAELKYVLKLSLQ  
KAQWCRSKVNFLGHEVTAEGINPQKKKVEAIKNTKSPTNLKELRSFLGMMNYSRKFID  
NYAEITKPLLQLLKKGAKWEWNECHEQAVSELKTKLIQAPCLAYPEGGKPFYVETGFTD  
KSVSAVLFQKQEKLNKIIAYASKSLSPVEIKFNCEKALLATVWALQYFRSFIQGEKIIVE  
TAHQSLQYLQSGRLKDGNSNSRITAWTMSLMGWPLEIRYKQDTKNPVAQGLAELHDC  
INVEHKDESPENDFLEEQSLSPYKSYEEEEYCKSLPCVYVDGCSFHTEEAEKMLVAGIGIV  
WNNIFPEISIGYKIGPKSSQVAELAAVYKAIQMAIEYDLKEFVLITDSYVRNSFVEYFPG  
WKRSNMLRSNKKPVKHGKLFCKIDELVTTYGLTIYWKKVRGHSKHPGADKDGNDLAD  
SLAKKAAIDGEILDIDDLMGTIQVDVTTRGQAQKESQPNVAMWSQDPSIEDLIESQKGD  
PIIGLFYKYIQNPQDHPITMEDCADNEELRVLKMGESQFSLQDGLLIRTSKNGITQWVVP  
AAYRGLMLQHAHDAPTAGHRGEKITYELLRDYAYWPHMLQDVRTYCOGCLVCPQFQP  
QGNHRAPLMKRGISMPWSDIQIDFIGPVTSSKGNRYMLTVTCLFTKWVECLPCKTCSS  
SVCASLLINHIFSRFGLPQRIESDRGSHFTSEVMTKMWEILGVKRKLHIA YRPASSGGVER  
YNQSIVNILKKFVKESGKDWDVKLPLVLMAIRATPSAATKLSPFEMITGRKMVLPQHLL  
YRTTDHNL MNATTAHQYVENLRKHLQHAF AFAQRNIEKAAVSTKTYIDLKTTQREYQ  
VDDKVLYLNFARDQVKERKFLPSWKGPYIITDKLSPVVYKVKIPKGDDFVEKWVHINQ  
LRVCHPSSQLRKIEQVES\*

>Loki-Xla consensus sequence *env* gene

ATGCCATCCAAGATGATCGCTATCTTATATGCAGTCCTGATCTTGGGGAAAGAGTTC  
CATGCTGAGCCGATTGTGATGCCAGGTCCATCATCCGGGATCATGCTACAGGATACG  
GCAGGATTCATCATGACCAACAAGAGGATCCTATCCCAGAAGGTTTATATGAGCCTA  
GATCCACGTTGTGTCATCGAAAGACAAGTCAACGTATCCAATATTCGATCACCGGAG  
ATTCAAACCTGGTACCAGCTACATATCGAATATTCACAAGAGCGGGTTACTCAGATC  
CTGGAGCAAACCCGGAAAACCTTTGACCAGAGAGCCCTTTTCTTCAAACCAAAGACC  
AAAGCGGTTCAATTTCTGCCATTGTTGCTGCTATAATCTTTGCGGTAGTAGGAACTGTG  
TTTGCAACCGGTGTAACAATCGCTAATCTGTATCCCTTAAAACCATGGAATCTGAG  
ATTAGTTCATTAAGACTAATTTACAACATATTCATGCAGAGATGGAAAGACAAAA  
GAAAGATTTAACAGACTTGTATGCCGTTGTGGAAGACACTGTCGTTACCACGAACTT  
ACACTTTAAATTGTTAGACCGCTCAATAGATCTACACCAAGGTCATGAGCAGTTTAA  
GCAAGA ACTTATTTTGT TAAAAGAACGTATCGACTTTCAACTTCAGGTTTCCATGA  
CGAGGAGCAAAGTGGGATGCAAGACCTAAGGGAAGATGTTACAAAGTGTTCGATGG  
AGAAAAGTAGAGGATATCCAAATGAACTTAGCATTTAATATGGGAGTTGCCATACC  
ATTATACATCGATCCCATTAATATGGAAATTTGCTTTTTACTATCAATCCCAATGGTT  
AATAGGAACAATATATTTCAAATGAAGAAAATCCACAATGTAGGTACGTGGAGAGA  
CAATATTCACATTAATAATCAAACCTCTGACATTGTAGCATATCAATCTTGAAACC  
GGACTGGCTAGCTGTTCTTCTGATAATTGTGCAACATTCCGGGATAATAATTTT  
CAATGTGAAGGCGATCCGTTCAATTATGATGCAACTAACGCTTTGTGCGGACTTGAA  
TTTGAGAAACATGGATCAGAGAAATGCCAGGAGATCTTGTCTAAAATTGAGGAGAA  
AGACTGGGTAAATGCAATTTTAATAAAAAGACAAATGGCTCGTTAGTACTCGTCTGCC  
AGACCTGACTGTTTTTTCTAACGACCACATTATGGCGAAAGTTATTGCTTTACCTTCC  
AGTGTATCGATCATCAAGGTACCCCTAATCCAGAGTTGTGATTGGAAATCGCACC

CTATATCCTGTAAATATTGAAGACATTGAAGGAGAGGTGGAAAGCATTGATGCATTC  
CAGAATCAGGAAATCACTATAAGTCCGATTAAATTTTTGTTNGACAATAAGCCC  
AGACATACCGTTCGTATGGTTATTA AAAAGCATAATGTTACCATGGATAACCCACAA  
TACTCATCAACCGACGACGAGATATTGTTTCCCTCTGTTTGGTCATGGGGGGAAAAT  
TACATATGGAGCATTTTGTTCGCAGTTATAGTAGGGTGGTTAACTGTAATCACCGTC  
TTGGCAATCCGTTGGATGAAGTTCATCAAAGA ACTCTAGATAAGCTATGGCTTAAA  
TCTCGTCGATTGAGTCTACATAATGAGTATGATGAAGGAAGAGTTTGA

>Loki-Xla consensus sequence Env protein

MPSKMIAILYAVLILKKEFHAEPVMPGPSSGIMLQDTAGFIMTNKRILSQKVYMSLDPR  
CVIERQVNVSNIRSPEIQTWYQLHIEYSQERVTOILEQTRKLTREPFSSNQRPKRFISAIV  
AAIIFAVVGTVFATGVTIANSVSLKTMSEISSLKTNLQHIHAEMERQKKDLTDL YAVVE  
DTVVTTNLHFKLLDRSIDLHQGHEQFKQELILLKERIDFQLQVFHDEEQSGMQDLREDV  
TKCRWRKVEDIQMNLAFNMGVAIPLYIDPINMEICFLLSIPMVNRNIFQMKKIHNVGT  
WRDNIHIKIQTDPDIVAYQSWKPDWLA VPILDNCATFRDNNFQCEGDPFNYDATNALCGL  
EFEKHGSEKCEILSKIEEKDWVNAILIKDKWL VSTRLPDLTVFSNDHIMAKVIALPSSVS  
IIKVPPNSRVVIGNRTLYPVNIEDIEGEVESIDAFQNEITISPDLKFL?DNKPRHTVRMVIK  
KHNVTMDTPQYSSTDDEILFPSVWSWGENYIWSILFAVIVGWLTVITVLAIRWMKFIKRT  
LDKLLWLSRRLSLHNEYDEGRV\*

>Loki-Xtr consensus sequence

TTGTCCGATTTTCAGATAAGATAATTATTAATTACAAGAATATTCTGATTTGTTAATG  
ATAACGTGATTATGTTACTTAATAGAATATATATTCATGAATGATATTATGCTTTTTG  
ATGAATCATATAGGAATAAATAATGAATGTTATTTTGT TTAGTTGATCAGAAACGTA  
TATGTTGAAAAGGAGGTTTGTATCGGATTACTAGCCCAGATGTATAACCTTTGTGTT  
AAAGCAAATATCAAAGGTTATATAATCCTTGGTGTCTAGGTGAACAAGATGAGAAC  
ACCTTGAAGGATCTTACAACTCTCCACAATATAGAGCA<sub>t</sub>ACCTGTTGAGAGGGTAA  
TAATTAATCAAGGACAGACCAATGACATATATTGTATGTGTACTAAGGTATTAAGTA  
GTTACACAGCATTGTTCTAGTGTGGAGCAATGTCAACAATAGTGTGTAACATCGAAT  
TAAGGAAGGTCAAAGTTATTTTATATTTTCTGAATATTTTTCAGACCACAATATTGA  
GGAAACAGTGACATCCACAGATGGTGGAGGACATTACGGGTCCAAGGTC ACTGTA  
ATAAATATTTAAATCAACTGGTGTAGTTTAACTTAAAGACTGCCCTTTGATGCCAG  
TTGGCTAGTTGATAAATCCC<sub>a</sub>GAGGTGGAGTTTTAGATAGAGATGAGGGATAAGTTA  
GGAGACAGGAGGACT<sub>a</sub>AGAAAAAAAAAAAAAAAAAGAAAAGAGGGATCTAAAAGAAAGAAC  
CTGAAAAAGAA<sub>a</sub>AATCTAAGGGGATCTAAA AACTGGAAGAGGAAGGAGAACTACTC  
TCAACTATAAGAAA ACTCTACTCTGGTAAATATAAATTTTATTATACTTTTTCTCGAT  
TAAGTTGTATGCTTGGATATTTATTATTCCTATGTATATTATAGTCTTACCCTAAACA  
TTGACTTTCCAGAGTTGCAA ACTGGGAATAATCTGTTTAATTTGGGTCCATTTTATT  
TTTCATTAGTATAGATATATGATATCCAAGTTAGCGATTTAATGGAGAAATAAGAAA  
ATTTAAGGATAGAATTCCTTAAGACCTCAA AATCAATTATTTACCCTTCCTTTGATTC  
AACATATTTAATTACCTTGTTATTAAGTATTGAAAGTGAACGTACATATATAATCTTG  
TGGATGCTTGCCATTTATTGAAGAATGTCTATTGGTCAATGTTCATTTTGATTAATTA  
TTAGATAGATATCAGGGAGTGTTAAGTAATAATTTCA TTTTGTAAATATTCATATTTA  
AATAAATTAATTATTTTATTAATAATTGTCATGATTTCTCACCTTTGTACCAATTGA  
TTGGGAAAGCTCGATATCGAATTCAGAGTTGGGCATATATTATTTAAGACTCCTCCT  
GTTACTAATAAGGAGCCTTGAATCTTTTAGATATACGCAGAATTAGCCCGACATAT  
ATTTGGAGGCACTGCTGAGATCGAGATTATTTTCTCATATTGGTACAAATAGTGAAA  
ACCATTCCAATACTTCTGTCAAGCTAATTATTTTGT TTTATTAATTAAGAGACCATGA

GTGTTGCAAGCAGTGAGAATGGGAATACCCCAGAGCAAATGATCCACAGAATTGTT  
GAATTCATATATACACGGGTAAAATTTGATATAGGGATGGATGTTTGGATTAATGAT  
TTGAAGAGAAATGCTAGAGCAGACCTTAATGATATCTGGGCAACAGACGGCCTGGT  
TGAACGCTATTTAACATGTATGAACTTAGCCTCTAACAGTTCAGACAAAGAAAAA  
AATTAATATGTGCCCTACCTCCTGTTTTATATGCATTAATGGAGGTAGATACCCTATC  
AAAAGCTAGAAAAGAAAATGTAGAAAATTGAGGTCTCAGTTACATGAGATAGAAT  
CAGATATCCAACATATGAAATCTGATAAAAACCAACTAGAGATAGATATCTCAAAC  
AAGGAAGCTTTTATTAGGGATTTAGAACTGATGCTGAACGTAGTCGCATAGCATA  
TGTAAGCTCAGAAAGGATTTTCGAAGAATTACAGCAACAGCACATTAAGGTCAACA  
GTCAGGTGTATATGGTGTGGAGAGATCTCCTGATCCTCCAATAATCACTCCCAATA  
TAAAAATTGGGCACCATATATTTCTAGAGCCAAACCAATTGATAATGTTGATTCAGA  
GGCACAAGATGTTTTGGGCCGGTTGGCTGAAGCTTGCCAAGCTGTGACCACCTTAAT  
AGGTAATCACAGAACAAGGGTCTTAGAGATTCTTCTTCAGACACGTCCCCAGAGAG  
GAATGTGAGGAATGTGCGAAATCAAACACCTATGTCAAATGTATCCCATAGAAGTA  
GTGTTTCCAATACTGATGCAAGTGAAGTTGAGAGTGATGAGAGAGCATGGGGATCC  
GGTCTTTCCCAAACAGGGGGAAGAATACCCATAAGAGGGGTTCAAAGGGAAAAA  
TCCCAATCTCCAAAAGAAAAACAAAATTCTGCCAGCATAATTAATTTTTAAATAC  
TGCTATACCAAATTTTCTAAGAAAGGTTCTTCCCAAATTGCAAACCACTTAGAACT  
ATATGAATCTACTATGGATTCATTAATTAATCTGAGGCAGACAAAATCAGGTTTCT  
TCCATGGGCCTTTGATGACAGATACCGTCATTACTTTTCCTCCTTTAAAGAGAGAGG  
AATCACCAAATGGCAGTCAGTCCTACATGAAATTAATCAGAATTTGGGCCCTATCG  
AACTACCACTGCCGCAAAGAGAGAAATTTATAAACTTACATGTAGATCTAATCAA  
GCCCTCGAGAATTTCTCTCTGTAATTAATAATGCCTATGGTTTAGCTTACAGAAACC  
CCGATTGGGAATCTGTGGAATTTAAACAAGTATTCTATGAGGCCTTACCAACCCAGA  
TCAAATTAAGTCTAGCTCATGATCTGGATTTTGAAAACCCTCTAGAAAGACTGGTAA  
CATCAGCAACTTTGCTGTTTAAACATTAGTGAGGGCCAAAATTAATGATAGGAAAT  
TTAAAAAATTTCCAGAGCACAATGTTGATGAGTCCGGGGTAAAACCTCATTTAAATT  
TTGAGTCCCAGCCAAAGAAAATACCTTCAGCCACTGGGCCTAATCAACAAAACCAA  
AAACAGCTAAATCCCAGACAACTAAACCTCAAATTGCCAAGGGGTCAGAAGGAAA  
TAGTTCAGGTTCTGGAAGCCAAGGTTACCGTCCTCGTTTCAACCAAGGGTACCAaGG  
ATACCGAGGTAACCAAAGATATGGGGGTTACCAAGGATACCGAGGTAACCAAAGAT  
ATGGGGGTTACCAAGGATACCGGGATCCCCAGGGATACAGACGTTGGAACAATAGG  
CCCAGGCAGCAATGGAGAAAAGGGCAGGAATCACCAGATTCACCCAGGGGTAAAT  
CACCCACAGGGAAcCAAAATGGTCCACGGAATCAAAACCCAGGTAGACCTAGCAGA  
TTTGATCAGCTTGCAGATCAGGTTTCCAAGTTAACTGACATTGTAAGTAAATTATCTC  
AAGTTTCTGCAGGAAAACAACCTGAAGTTTTTTTTtAGAGGAAAAGCGGGGCCAAGC  
TCCGCCAAATAAAGGAAGCAGAACCAAATTGCTATATGGAAATGGACAGGAAAGA  
ATTAAATACAGTCAATGATCATGTTTTGCATTGCCCGACCCTGAATTCAGGGCCGG  
GAAGGGAAAATCTAATATTTTCATCTGTTTTACAGCCTAATAAGGACAATTCTTATAA  
TCCGGTGTATTTGAACCAGTGTGTGAAGTACCTTCGGTTCAGTCTGTTCCATTAATA  
GAaTCCATAGGAACACAAATGCCCTGCAGACAGAACAAGGAGGAGCAATCTCCAAA  
TATCCTGACGCTGCAGAGAGATCACTTTTTAAATCAACAGATGATAAAACACTCCAA  
TTTCTCTGTAATCTTTACAGTTAGATGGCCGGTATTTTATAGATATTTGTCTCCAG  
GATGGATGTGTGCGACCAATCCAAGGTTTATTGGATACCGGATCTCAGGTCACTATT  
TTGTCTTTCAGCTATTTCCAACAGATCTTAGAGTCCTCAAAGAATAAACCGAGATTG  
ACGGTATTTGATGGATCTCTGGTAAGTGTAGGTGGTGTAGTCTACAAGTGAAGGC

AAGTCCTGGCTGACATATAAGATTGGTAAAAAGACCATTAGACATCCAACATTGATT  
GTAGATCTTCCATATGATCGGCTGATCATTGGAATTGATCTGCTCAAAAGGTTAAGA  
TCCATAATTGACTTTATTAATGAAGCAATATGGACTCAGGTAAAAACCCCAATCTCT  
TTTGAACGTTCCCAACAATGCAAAACCGCAAAATAGTTGCCATATGATTGAAGAAAG  
ACCTAATTCTGTCGAAATCCATTTCCGGAACAGTCAGGTACCAGATGTCTCAATCCT  
AAAAACGGTAAACCTGAAGAAAGCATTAACTTCCTTCCACATCATTAATATCCA  
AAAGGACAAAATTGAAAAGATAATCCTAGAGGATGATGTGTTAACCATTTCTCTTAA  
AGGGGGAAATCGGGAAGTAGCAGGCATAACCAGACATATCCAATCATTGGTTAAAA  
TCGAGAAGACCAATGATACTATGCTGGTTCCTCGTACAGGTAAATAATATTGCCCGGG  
TGAAATATGCCAAGCTGGATCTCAAATCCGAAGTCAGCTATATAAGTTTAGGACTTC  
TAAAGCAGGTTACAAATCCTCAGATGATTAATTTTCTTCCTTACAGGAATGGGTTT  
ATGACCTGGACAAAGACGACCAGAGTCAAATGTGATTGCAAAATGCATTTTATCT  
ATCTCCCTAGGAAACAAATCTGCGGAACACGTTTTCAATGTGTTAAAGGAACCGCAA  
TATCAAATGTATTTAGGAAATGACATTATACATCGGTTTGCCATACAAGTTGATTTG  
ATCAATAATGTTTTGTGGTCCAGACTATCAGGGAATCCAGAGGAATTCCAGGATAAA  
GAACAAGCCTTGAGATGGGGACAACGAATACCCTATGCAGTGGATATCTTAGTCGC  
CGGAAAGGTAAAAGTCCCTGGGGGATGTAAATCATTCTTTTACCCATTCGAGTAAA  
GAAAGGGCAAAGCTGAGGAATCCAGATGCATTAATTTGCTTATCCAATCGAATGC  
ACAATTTGGATTGAAGGTAAAACCGAATCCTATAATAAATATTCATCAGGATCCAT  
TATATATGGTTATCGATAACATGAGTCCTTATAACATTATGTTACAAGAGGACACAA  
TGATTGGCCTAGCCATCGATTCAGAATATTATACTTTTGGGTTCCAAAATGATATAA  
TTGGATTAATACCTGACGAATATCTAACAGAAGAACAATGGTGGATCAACATTGCT  
TTTCAACACCTGAGGGATTGTTCAGTATTCCTCTGTTTATCCTTTCAATCCTGAGGA  
TGGTACATGTTACGTTGAGGAGACATCATTGATCTTTAACCATGAAATCGAGAAAGG  
TGAGTATGAGTCATTCCAACAGGGGAAAGATCAGATATATCACACCCAGATGACC  
TGACCAGCAAGCTTGAAGAAGCTTATGAGGTAAATCAACCTGAAATTTTCCCAGAAT  
TTCAAGAGCGGGTGAAGAGCAACTCTCTATAGCTGATGCATGTTCTGATGAATCAG  
AACGACAACAGCTAAAAGAACTATTTTGGGAATTCAGGATATGTTTGCCAAGGATT  
CTTATGACTGCGGGGAAACTAACCTACATGTTACAAGAATCCAGACCGATCCAGAT  
GCACCCCTGTATTTATTAACAATACCGACTTCCGTTAGCGGCTTATGAGTCACTCT  
CGGAAATCGTTAAAATCTGGAGAAGAAGGGTATCATCCGCCAGTACATAGTTCTT  
TTAATCATCCAATACTTGGAGTCCTTAAACCCAATGGTCAGTTTCGTCTTTGCTCAGA  
CTTGAGACAGTTGAACAAACAAGTCTACATGTCTGGTTGGCCTGTACCATAACATTGA  
CCAATGCTTGGCACAAATCCAAGGGTCTAAAATTTTACCGCCCTTGATTGCGCACA  
AGGATATTGGACAATTAATAATAGATGAAAGGGATCAATATAAACTAGCCTTTACAT  
TTGGAAAGCAACAATATGCATGGACCCGATTACCTTTCGGATACATTAATGCAGGCC  
ATGAGTTTGCTGTATTCATGCACAAAGCCATGCCTGATGCTGCTGAACGAGGTACAT  
TATCATATGTGGATGACATATTGATAAAAAGTACAACCTTTTGGAGAACAATTTGCAG  
AATTGAGATATGTATTAATCAACTAAAGAAGGCAGGTGTTAAACTTTCTTTACAGA  
AGGCTCAATGGTGCCGATCTAAGGTAAATTTCTTGGACATGAAATTACTGCCGAAG  
GAATCAATCCACAGgAAGATCGTTCCTGGGTATGnaTGAATTATTCACGTAAGTTCAT  
AGACAACATATGCAGAAATTACAAAACCTCTTTTGCAGTTGCTGAAGAAAGGAGCAA  
AATGGAAATGGGATGAATGTCACGATCAAGCAATATCTGAACTTAAAATAAGCTT  
ATCCAGGCTCCATGCCTTGCATATCCAGAAGGTGGAAAACCCCTTCTATATCGAAACA  
GGTTTTACCAACAAAAGTGTAAGTGCAGTTCCTTTTCCAAAACAAGAAAAACTGAAT  
AAAATAATCGCTTATGCCAGCAAGTCGTTATCATCAGTTGAAATAAAATTTAATAAC

TGTGAAAAAGCATTATTAGCAACTGTATGGGCTTTGCAATATTTTCAGGAGTTTTATT  
CAAGGTGAAAAGATAATTGTGGAACTGCACATCAATCACTACAATATTTACAGAG  
TGGTCGATTAAAGGATGGAAACCTGTCAAATAGTAGGATAACTGCATGGACAATGT  
CCCTTATGGGATGGCCATTGGAGATCAGATATAAACAGGATACTAAAAATCCAGTT  
GCTCAAGGATTAGCTGAACTCCATGATTGTATTAATGTTGAACACAAAGATGAGTCA  
CCAGAAAATGACTTTCTGGAGGAACAATCACTATCTCCATATAAATCATATGAAGAA  
GAATACTGCAAATCATTACCATGTGTATATGTTGATGGCTGTTCTTTCCATACAGAA  
GAAGCTGAAAAGATGCTAGTTGCAGGTATTGGGATAGTATGGAATAATATATTCCC  
AGAGATATCCACAGGATAACAAGATTGGTTCCAAAAGTAGCCAAGTCGCAGAGCTTG  
CtGCTGTGTACAAAGCCGTACAAATGGCTATTGAATATGATATTAAGAATTTGTTTT  
AATTACAGATTCCGATTATGTTTCGGAACAGCTTTGTGGAATATTTTCCCGGATGGAA  
AAGATCCAATATGATGAGAAGTAATAAGAAACCAGTCAAACATGGTAAGTTGTTTT  
GTAAAATCGATGAATTAGTTACTACCCACGGCCTTAACATATATTGGAAGAAGGTAA  
GGGGTCATTCGAAACATCCAGGTGCAGATAAAGATGGAAATGACTTAGCAGATTCC  
CTTGCCAAGAAAGCAGCCATGGAGGGAGAGATCTTGGATATTGATGACCTCATGGG  
AACTATCCAAGTGAATGCCACAACCAGGAGTCAGACCCAAAAGGAATCTCAACCTA  
ATGTGGCAATGTGGAGCCAAGATTCCCCTAGCGAAGATCTCATTGAGAGTCAGAAA  
GGGGATCCTATTATTGGTTTATTTTATAAATATATTCAAAATCCAAAGGATCATCCC  
ATAACCATGGAAGAATGTGCTGATAAAGAGGAGTTACGTATTTTGGTGAAAGGGCGA  
GTCCCAATTTTCATTACAAGATGGATTGCTGATACGAACCTCGAAAAATGGTATTAC  
ACAATGGGTAGTACCCGCAGCATATCGGGGTTTGTGTTACAACATGCTCATGATGC  
CCCGACAGCTGGTCATCGAGGAGAGAAAATAACATATGAATTGTTAAGGGATTATG  
CTTATTGGCCACACATGTTACAGGATGTCAGGACTTATTGTCAAGGATGTTTGATAT  
GTCCTCAATTCCAGCCACAAGGACCCAATCACCGGGCACCGCTGATGAAAAGAGGA  
ATATCCATGCCATGGTCAGACCTCCAAATTGATTTCAATTGGACCAGTAACAACATCC  
TCAAAGGAAACCGGTATATGCTAACTGTAACCTGTTTATTTACAAAATGGGTAGAA  
TGTTTGCCATGCAAGACGTGTAGTTCTAGTGTATGCGCATCACTGCTCATTAAACCAT  
ATATTTTCCAGATTTGGTCTTCCCAACGTATTGAATCTGACCGCGGAAGTCACTTCA  
CCAGCGAAGTAATGACTAAGATGTGGGAAATTCTAGGAGTAAAAGGAAGCTACAC  
ATAGCTTACAGACCAGCTTCTAGTGGTGGAGTAGAGCGTTACAATCAATCAATCATA  
AACATTCTGAAAAAGTTTGTCAAAGAATCTGGTAAAGACTGGGATGTCAAATTACC  
ACTAGTTCTCATGGCTATTAGAGCCACCCCGAGTGCGGCAACCAAAAATTTCTCCATT  
TGAGATGATTACGGGTAGAAAAATGGTATTACCTCAACATCTACTTTATAGAACCAC  
AGATCACAATTTGATGAATGCAATGACTGCACATCAATATGTAGAAAATTTACGAA  
AGCATCTACAGCATGCTTTTTCGTTTTGCTCAAAGAAATATTGAGAAAGCTGCAGTAA  
GTACGAAAACGTACTATGATCTAAAAACAACCTCAAAGGAATATCAGGTTGATGAT  
AAAGTTTATCTTTATAACTTTGCCAGAGACCAAGTAAAGGAAAGGAAATTCTTACCT  
TCCTGGAAAGGTCCATATATAATCACTGATAAATTATCTCCTGTGGTTTATAAAGTT  
AAAATTCCTAAGGGGGATGATTTTGTGAAAAATGGGTGCACATTAACCAATTACGT  
GTTTGTATCCTAGCCAACAGCTTCGGAGAATAGAGCAAGTCGAGAGCTGAGTAGT  
AAGAAATCAGGAGATTTTAGTTAAAGATGGAAGTAGAGATTAATATTGTATATAGA  
TGTTGTATCATGATATGCCTATGTCTCTACCTTCTAAATATCCTTTATCTTCTCAGT  
GAACTGAACTTGCTATGTATATATGACGGCTGAACCTAATGATTTCTTTTGATTATC  
TATAGGCGCAAAGATGCCATCCAAGATGATCGCTATTTTATATGCAGTCCTGATCTT  
GGGGAAAGAGTTACACGCTGAGCGGATTGTGATGCCAGGTCCATCATCCGGGATCA  
TGCTACAGGATACAGCGGGATTCATCATGACCAACAAGAGAATCTTGTCCAGAAG

ATTTATATGAGCCTAGATCCACGTTGTGTGCATCGAAAGACAAGTCAACGTATCCAAT  
ATTCGATCACCCGAGATTCAAACCTGGTACCAGCTGCATATTGAATATTCACAAAAG  
CGGATTACTCAAATCCTGGAGCAAACCCGGAAAACCTTTAATCAGAGAGCCTTTTTTCG  
TCAAACCAAAGACCAAAACGGTTCATTTCTGCTATTGTTGCTGCTATAATCTTTGCA  
GTAGTAGGAAACGTGTTTGCAACCCGGAGTAACAATCGCTAATTCCATATCCCTTAAA  
ACCATGGAATCTGAGATTAATTCATTA AAAACTAATTTACAACATATTCATGTGGAG  
ATGGAAAGACAAAAGAAAGATTTAACAGACTTGTATACCGTTGTGGAAGACACTGT  
CATTGCTACGAACTTGC ACTCTAAATTATTA AACCACTCGATAAATCTTCACCAAAG  
TCATGAACTGTTTAAACAAGA ACTGATTTTGCTAAAGGAGCGTATCGACTTTCAACT  
TCAAGTTTTCCATGACGAGGTGCAAAGTGGAATGCAAGACCTGAGAGAAGGGCGAA  
TTCCTCTCTATTTTGTATCATACGAGATTATTCGCAAGATGTTACAAAATGCAGATGG  
AGATAAAGTAGAGGATATCCAAATGAACTTAGCGTTTAAATATGGGAGTTGCCATAC  
CATTATACATTGATCCTGTTAAAATGGAAATCTGCTTTTTACTATCAATTCCAGTGGT  
CAATAGGAACAATATATTTCAAATGAAAAAAATCCACAATGTAGGTACATGGAGAG  
ATAATATTCATGTTAAGATCCAAACCCCTGATATCGTGGCATATCAATCTTGGAGAC  
CGGACTGGCTATCTGTTCCCTATTCTAAATAATTGTGCAATTTTTAGAGATAATAACTT  
TCAATGTGAAGGTGACCCATTTAATTATGATACTAATGCTTTGTGCGGACTTGA  
CTTTGAGAAACATGGATCAGAAAAATGCCAGGTA ACTTTGTCTAAAATCGAGGAGA  
AAGATTGGGTGAATGCAGTTTTAATAAAAGACAAATGGCTCGTTAGTACTCGTTTAC  
CTGACCTAACTGTTTTTTCTAAGGACCACATTATGGCAAAAATTATTGCTATACCAA  
CTCATGTATCGATTATCAAAGTACCCCTAATTCCAGAGTTGTAATTGGAAATCGCA  
CaTTATATCCTGTAAACATTGAGGACACTGAAGGAGAGGTGGAAAGCATTGATGCAT  
TCCAAAATCAGGAGATTACCATAAGTCCGGATTTAAAATTTTTGTTGGACAATAAGC  
CCAGCCATACCATCCGTATGGTTATAAAAAAACATAATATCACCATGGATACTCCAC  
AATTTTCACCAACCGATGACGAAATACTGTTTCCTTCTGTTTGGTCATGGGGGGAAA  
ACTATATATGGAGTATATTGATCACAATTATAGTAGGATGGTTAACTGTAATCACCA  
TCTTAGCAATTCGTTGGATGAAGATCATCAAAAAGACTCTAGATAAACTATGGCTTA  
AATCTCGCCGATCAAGTTTACATAATGAGTATGATGAAGGAAGAGTTTGAAAACCT  
AAGTAATTTTCCTAAAATGTTTCATATTATAGGAAACATTTTAGAAAAACAAGGGGGA  
TTTGTCCGATTTTCAGATAAGATAATTATTAATTACAAGAATATTCTGATTTGTTAAT  
GATAACGTGATTATGTTACTTAATAGAATATATATTCATGAATGATATTATGCTTTTT  
GATGAATCATATAGGAATAAATAATGAATGTTATTTTGTTTAGTTGATCAGAAACGT  
ATATGTTGAAAAGGAGGTTTGTATCGGATTACTAGCCAGATGTATAACCTTTGTGT  
TAAAGCAAATATCAAAGGTTATATAATCCTTGGTGTCTAGGTGAACAAGATGAGAA  
CACCTTGAAGGATCTTACAAACTCTCCACAATATAGAGCACACCTGTTGAGAGGGTA  
ATAATTAATCAAGGACAGACCAATGACATATATTGTATGTGTACTAAGGTATTAAGT  
AGTTACACAGCATTGTTCTAGTGTGGAGCAATGTCAACAATAGTGTGTAACATCGAA  
TTAAGGAAGGTCAAAGTTATTTTATATTTCTGAATATTTTCAGACCACAATATTGA  
GGAAACAGTGACATCCACAGATGGTGGAGGACATTACGGGTCCAAAGGTC ACTGTA  
ATAAATATTTAAATCAACTGGTGATAGTTTAACTTAAAGACTGCCCTTTGATGCCAG  
TTGGCTAGTTGATAAATCCCTGAGGTGGAGTTTTAGATAGAGATGAGGGATAAGTTA  
GGAGACAAGAGGACTGAGAAAAAAGAAAAGAGGGATCTAAAAGAAAGAA  
CCTGAAAAGAAAATCTAAGGGGATCTAAAACCTGGAAGAGGAAGGAGAACTAC  
TCTCAACTATAAGAAAACCTACTCTGGTAAATATAAATTTTGTTATACTTTTTCTCG  
ATTAAGTTGTATGCTTGGATATTTATTATTCCTATGTATATTATAGTCTTACCCTAAA  
CATTGACTTTCCAGAGTTGCAAACCTGGGAATAATCTGTTTAAATTTGGGTCCATTTTA

TTTTTCATTAGTATAGATATATGATATCCAAGTTAgCAATCTAATGGGGAAATAAGA  
ACATTTAAAGATAGAATTCCTTAAGACCTCAAATCAATCATTTACCCTTCCTTTGAT  
TCAACATATTTAATTACCTTGTTATTAAGTATTGAAAGTGAACGTACATATATTATCT  
TGTGGATGCTTGCCATTTATTGAATAATGTCTATTGGTCAATGTTCATTTTGATTAAT  
TATTAGATAGATATCAGGGAGTGTTAAGTAATAATTCATTTTTGTAATATTCATATT  
TAAATAAATTAATTATTTATTAATAATTGTCATGATTTCTCACCTTTGTACCAATT  
GATTGGGAAAGCTCGATATCGAATTCAGAGTTGGGCATATATTATTTAAGACTCCTC  
CTGTTACTAATAAGGAGCCTTAAATTCTTTTAGA

>Loki-Xtr consensus sequence 5'LTR

TTGTTCGGATTTTCAGATAAGATAATTATTAATTACAAGAATATTCTGATTTGTTAATG  
ATAACGTGATTATGTTACTTAATAGAATATATATTCATGAATGATATTATGCTTTTTG  
ATGAATCATATAGGAATAAATAATGAATGTTATTTTGTTTAGTTGATCAGAAACGTA  
TATGTTGAAAAGGAGGTTTGTATCGGATTACTAGCCCAGATGTATAACCTTTGTGTT  
AAAGCAAATATCAAAGGTTATATAATCCTTGGTGTCTAGGTGAACAAGATGAGAAC  
ACCTTGAAGGATCTTACAACTCTCCACAATATAGAGCAtACCTGTTGAGAGGGTAA  
TAATTAATCAAGGACAGACCAATGACATATATTGTATGTGTACTAAGGTATTAAGTA  
GTTACACAGCATTGTTCTAGTGTGGAGCAATGTCAACAATAGTGTGTAACATCGAAT  
TAAGGAAGGTCAAAGTTATTTATATTTTCTGAATATTTTCAGACCACAATATTGA  
GGAAACAGTGACATCCACAGATGGTGGAGGACATTACGGGTCCAAAGGTCACTGTA  
ATAAATATTTAAATCAACTGGTGATAGTTTAACTTAAAGACTGCCCTTTGATGCCAG  
TTGGCTAGTTGATAAATCCCAGAGGTGGAGTTTTAGATAGAGATGAGGGATAAGTTA  
GGAGACAGGAGGACTaAGAAAAAAAAAAAAAGAAAAGAGGGATCTAAAAGAAAGAAC  
CTGAAAAGAaAATCTAAGGGGATCTAAAACTGGAAGAGGAAGGAGAACTACTC  
TCAACTATAAGAAACTCTACTCTGGTAAATATAAATTTTATTATACTTTTTCTCGAT  
TAAGTTGTATGCTTGGATATTTATTATTCCTATGTATATTATAGTCTTACCCTAAACA  
TTGACTTTCCAGAGTTGCAAACCTGGGAATAATCTGTTTAATTTGGGTCCATTTTATT  
TTTCATTAGTATAGATATATGATATCCAAGTTAGCGATTTAATGGAGAAATAAGAAA  
ATTTAAGGATAGAATTCCTTAAGACCTCAAATCAATTATTTACCCTTCCTTTGATTC  
AACATATTTAATTACCTTGTTATTAAGTATTGAAAGTGAACGTACATATATAATCTTG  
TGGATGCTTGCCATTTATTGAAGAATGTCTATTGGTCAATGTTCATTTTGATTAATTA  
TTAGATAGATATCAGGGAGTGTTAAGTAATAATTCATTTTTGTAATATTCATATTTA  
AATAAATTAATTATTTTATTAATAATTGTCATGATTTCTCACCTTTGTACCAATTGA  
TTGGGAAAGCTCGATATCGAATTCAGAGTTGGGCATATATTATTTAAGACTCCTCCT  
GTTACTAATAAGGAGCCTTGAATTCTTTTAGA

>Loki-Xtr consensus sequence 3'LTR

TTGTTCGGATTTTCAGATAAGATAATTATTAATTACAAGAATATTCTGATTTGTTAATG  
ATAACGTGATTATGTTACTTAATAGAATATATATTCATGAATGATATTATGCTTTTTG  
ATGAATCATATAGGAATAAATAATGAATGTTATTTTGTTTAGTTGATCAGAAACGTA  
TATGTTGAAAAGGAGGTTTGTATCGGATTACTAGCCCAGATGTATAACCTTTGTGTT  
AAAGCAAATATCAAAGGTTATATAATCCTTGGTGTCTAGGTGAACAAGATGAGAAC  
ACCTTGAAGGATCTTACAACTCTCCACAATATAGAGCACACCTGTTGAGAGGGTAA  
TAATTAATCAAGGACAGACCAATGACATATATTGTATGTGTACTAAGGTATTAAGTA  
GTTACACAGCATTGTTCTAGTGTGGAGCAATGTCAACAATAGTGTGTAACATCGAAT  
TAAGGAAGGTCAAAGTTATTTATATTTTCTGAATATTTTCAGACCACAATATTGA  
GGAAACAGTGACATCCACAGATGGTGGAGGACATTACGGGTCCAAAGGTCACTGTA  
ATAAATATTTAAATCAACTGGTGATAGTTTAACTTAAAGACTGCCCTTTGATGCCAG

TTGGCTAGTTGATAAATCCCTGAGGTGGAGTTTTAGATAGAGATGAGGGATAAGTTA  
GGAGACAAGAGGACTGAGAAAAAAGAAAAGAGGGATCTAAAAGAAAGAA  
CCTGAAAAGAAAATCTAAGGGGATCTAAAACTGGAAGAGGAAGGAGAACTAC  
TCTCAACTATAAGAAAATCTACTCTGGTAAATATAAATTTTGTATACTTTTCTCG  
ATTAAGTTGTATGCTTGGATATTTATTATTCCTATGTATATTATAGTCTTACCCTAAA  
CATTGACTTTCCAGAGTTGCAAATGGGAATAATCTGTTAATTTGGGTCCATTTTA  
TTTTTCATTAGTATAGATATATGATATCCAAGTTAgCAATCTAATGGGGAAATAAGA  
ACATTTAAAGATAGAATTCCTTAAGACCTCAAATCAATCATTTACCCTTCCTTTGAT  
TCAACATATTTAATTACCTTGTTATTAAGTATTGAAAGTGAACGTACATATATTATCT  
TGTGGATGCTTGCCATTTATTGAATAATGTCTATTGGTCAATGTTCAATTTTGATTAAT  
TATTAGATAGATATCAGGGAGTGTTAAGTAATAATTCATTTTTGTAATATTCATATT  
TAAATAAATTAATTTTATTAAATAATTGTCATGATTTCTCACCTTTGTACCAATT  
GATTGGGAAAGCTCGATATCGAATTCAGAGTTGGGCATATATTATTTAAGACTCCTC  
CTGTTACTAATAAGGAGCCTTAAATTCTTTTAGA

>Loki-Xtr consensus sequence *spc7-gag-pol* gene

ATGAGTGTTGCAAGCAGTGAGAATGGGAATACCCAGAGCAAATGATCCACAGAAT  
TGTTGAATTCATATATACACGGGTAAAATTTGATATAGGGATGGATGTTTGGATTAA  
TGATTTGAAGAGAAATGCTAGAGCAGACCTTAATGATATCTGGGCAACAGACGGCC  
TGGTTGAACGCTATTTAACATGTATGAACTTAGCCTCTAACAGTTCAGACAAAGAAA  
AAAAATTAATATGTGCCCTACCTCCTGTTTTATATGCATTAATGGAGGTAGATACCC  
TATCAAAAGCTAGAAAAGAAAATGTAGAAAATTGAGGTCTCAGTTACATGAGATA  
GAATCAGATATCCAACATATGAAATCTGATAAAAACCAACTAGAGATAGATATCTC  
AAACAAGGAAGCTTTTATTAGGGATTTAGAACTGATGCTGAACGTAGTCGCATAG  
CATACTGTAAGCTCAGAAAGGATTTCAAGAATTACAGCAACAGCACATTAAGAGT  
CAACAGTCAGGTGTATATGGTGTGGAGAGATCTCCTGATCCTCCAATAATCACTCCC  
CAATATAAAAATTGGGCACCATATATTTCTAGAGCCAAACCAATTGATAATGTTGAT  
TCAGAGGCACAAGATGTTTTGGGCCGTTGGCTGAAGCTTGCCAAGCTGTGACCACC  
TTAATAGGTAATCACAGAACAAGGGTTCTTAGAGATTCTTCTTCAGACACGTCCCCA  
GAGAGGAATGTGAGGAATGTGCGAAATCAAACACCTATGTCAAATGTATCCCATAG  
AAGTAGTGTTCCAATACTGATGCAAGTGAAGTTGAGAGTGATGAGAGAGCATGGG  
GATCCGGTCCTTTCCCAAACAGGGGGAAGAATACCCATAAGAGGGGTTCAAAGGG  
AAAAATCCCCAATCTCCAAAAGAAAACAAAATTCTGCCAGCATAATTAATTTTTA  
AATACTGCTATACCAAATTTTCTAAGAAAGGTTCTTCCCAAATTGCAAACCACTTA  
GAACTATATGAATCTACTATGGATTCATTAATAATCTGAGGCAGACAAAATCAGG  
TTTCTTCCATGGGCCTTTGATGACAGATACCGTCATTACTTTTCTCCTTTAAAGAGA  
GAGGAATCACCAAATGGCAGTCAGTCCTACATGAAATTAATCAGAATTTGGGCC  
TATCGAACTACCACTGCCGCAAAGAGAGAAATTTATAAACTTACATGTAGATCTAAT  
CAAAGCCCTCGAGAATTTCTCTCTGTACTTAAAAATGCCTATGGTTTAGCTTACAGA  
AACCCCGATTGGGAATCTGTGGAATTTAAACAAGTATTCTATGAGGCCTTACCAACC  
CAGATCAAATTAAGTCTAGCTCATGATCTGGATTTTGAAAACCTCTAGAAAGACTG  
GTAACATCAGCAACTTTGCTGTTTAAACATTAGTGAGGGCCAAAACCTTAAATGATAGG  
AAATTTAAAAAATTTCCAGAGCACAATGTTGATGAGTCCGGGGTAAAACCTCATTTA  
AATTTGAGTCCCAGCCAAAGAAAATACCTTCAGCCACTGGGCCTAATCAACAAAA  
CCAAAACAGCTAAATCCCAGACAACTAAACCTCAAATTGCCAAGGGGTCAGAAG  
GAAATAGTTCAGGTTCTGGAAGCCAAGGTTACCGTCCCTCGTTTCAACCAAGGGTACC  
AAGGATACCGAGGTAACCAAAGATATGGGGGTTACCAAGGATACCGAGGTAACCAA



AGATATGGGGGTTACCAAGGATACCGGGATCCCCAGGGATACAGACGTTGGAACAA  
TAGGCCCAGGCAGCAATGGAGAAAAGGGCAGGAATCACCAGATTCACCCAGGGGT  
AAATCACCCACAGGGAACCAAAATGGTCCACGGAATCAAACCCAGGTAGACCTAG  
CAGATTTGATCAGCTTGCAGATCAGGTTTCCAAGTTAACTGACATTGTAAGTAAATT  
ATCTCAAGTTTCTGCAGGAAAACAACCTGAAGTTTTTTTTTAGAGGAAAAAGCGGGGC  
CAAGCTCCGCCAAATAAAGGAAGCAGAACCAAATTGCTATATGGAAATGGACAGGA  
AAGAATTAATACAGTCAATGATCATGTTTTGCATTGCCCGACCCTGAATTCAGGG  
CCGGGAAGGGAAAATCTAATATTTTCATCTGTTTTACAGCCTAATAAGGACAATTCTT  
ATAATCCGGTGTTATTTGAACCAGTGTGTGAAGTACCTTCGGTTCAGTCTGTTCCATT  
AATAGAATCCATAGGAACACAAATGCCCTGCAGACAGAACAAGGAGGAGCAATCTC  
CAAATATCCTGACGCTGCAGAGAGATCACTTTTTAAATCAACAGATGATAAAACACT  
CCAATTTCCCTCTGTAATCTCTTACAGTTAGATGGCCGGTATTTTATAGATATTTGTCT  
CCAGGATGGATGTGTCCGACCAATCCAAGGTTTATTGGATACCGGATCTCAGGTCAC  
TATTTTGTCTTTCAGCTATTTCCAACAGATCTTAGAGTCCTCAAAGAATAAACCGAG  
ATTGACGGTATTTGATGGATCTCTGGTAAGTGTAGGTGGTGATAGTCTACAAGTGAA  
AGGCAAGTCCTGGCTGACATATAAGATTGGTAAAAAGACCATTAGACATCCAACAT  
TGATTGTAGATCTTCCATATGATCGGCTGATCATTGGAATTGATCTGCTCAAAGGT  
TAAGATCCATAATTGACTTTATTAATGAAGCAATATGGACTCAGGTAAAAACCCCAA  
TCTCTTTTGAACGTTCCCAATGCAAAACCGCAAAATAGTTGCCATATGATTGAAG  
AAAGACCTAATTCTGTGAAATCCATTTCCGGAACAGTCAGGTACCAGATGTCTCAA  
TCCTAAAAAACGGTAAACCTGAAGAAAGCATTAACTTCCTTCCACATCATTAAATA  
TCCAAAAGGACAAAATTGAAAAGATAATCCTAGAGGATGATGTGTTAACCATTTCTC  
TTAAAGGGGGAAATCGGGAAGTAGCAGGCATAACCAGACATATCCAATCATTGGTT  
AAAATCGAGAAGACCAATGATACTATGCTGGTTCCCGTACAGGTAAATAATATTGCC  
CGGGTGAAATATGCCAAGCTGGATCTCAAATCCGAAGTCAGCTATATAAGTTTAGG  
ACTTCTAAAGCAGGTTACAAATCCTCAGATGATTAAATTTTCTTCCCTTACAGGAATG  
GGTTTATGACCTGGACAAAGACGACCAGAGTCAAATGTGATTGCAAATGCATTTT  
ATCTATCTCCCTAGGAAACAAATCTGCGGAACACGTTTTCAATGTGTTAAAGGAACC  
GCAATATCAAATGTATTTAGGAAATGACATTATACATCGGTTTGCCATACAAGTTGA  
TTTGATCAATAATGTTTTGTGGTCCAGACTATCAGGGAATCCAGAGGAATTCCAGGA  
TAAAGAACAAGCCTTGAGATGGGGACAACGAATACCCTATGCAGTGGATATCTTAG  
TCGCCGAAAGGTAAAAGTCCCTGGGGGATGTAAATCATTCTTTTACCCATTCGAG  
TAAAGAAAGGGCAAAGCTGAGGAATCCAGATGCATTAATTTGCTTATCCAATCGA  
ATGCAACAATTTGGATTGAAGGTAAAACCGAATCCTATAATAAATATTCATCAGGAT  
CCATTATATATGGTTATCGATAACATGAGTCCTTATAACATTATGTTACAAGAGGAC  
ACAATGATTGGCCTAGCCATCGATTCAGAATATTATACTTTTGGGTTCCAAAATGAT  
ATAATTGGATTAATACCTGACGAATATCTAACAGAAGAACAATGGTGGATCAACA  
TTGCTTTTCAACACCTGAGGGATTGTTCAGTATTCCTCTGTTTATCCTTTCAATCCT  
GAGGATGGTACATGTTACGTTGAGGAGACATCATTGATCTTTAACCATGAAATCGAG  
AAAGGTGAGTATGAGTCATTCCAACAGGGGAAAGATCAGATATATCACACCCAGAG  
TGACCTGACCAGCAAGCTTGAAGAAGCTTATGAGGTAAATCAACCTGAAATTTTCCC  
AGAATTTCAAGAGCGGGTGGAAGAGCAACTCTCTATAGCTGATGCATGTTCTGATGA  
ATCAGAACGACAACAGCTAAAAGAACTATTTTGGGAATTCCAGGATATGTTTGCCA  
AGGATTCTTATGACTGCGGGGAAACTAACCTACATGTTACAAGAATCCAGACCGATC  
CAGATGCACCCCTGTATTTATTAACAATACCGACTTCCGTTAGCGGCTTATGAGT  
CACTCTCGGAAATCGTTAAAATCTGGAGAAGAAGGGTATCATCCGCCAGTACAT

AGTTCTTTTAATCATCCAATACTTGGAGTCCTTAAACCCAATGGTCAGTTTCGTCTTT  
GCTCAGACTTGAGACAGTTGAACAAACAAGTCTACATGTCTGGTTGGCCTGTACCAT  
ACATTGACCAATGCTTGGCACAATCCAAGGGTCTAAAATTTTTACCGCCCTTGATT  
GCGCACAAGGATATTGGACAATTAATAAGATGAAAGGGATCAATATAAACTAGCC  
TTTACATTTGGAAAGCAACAATATGCATGGACCCGATTACCTTTCGGATACATTAAT  
GCAGGCCATGAGTTTGCTGTATTTCATGCACAAAGCCATGCCTGATGCTGCTGAACGA  
GGTACATTATCATATGTGGATGACATATTGATAAAAAGTACAACCTTTTGGAGAACAT  
ATTGCAGAATTGAGATATGTATTAATCAACTAAAGAAGGCAGGTGTAAACTTTCT  
TTACAGAAGGCTCAATGGTGCCGATCTAAGGTAATTTCCCTGGACATGAAATTACT  
GCCGAAGGAATCAATCCACAGGAAGATCGTTCCTGGGTATGNATGAATTATTCACGT  
AAGTTCATAGACAACCTATGCAGAAATTACAAAACCTCTTTTGCAGTTGCTGAAGAAA  
GGAGCAAAATGGAAATGGGATGAATGTCACGATCAAGCAATATCTGAACTTAAAAC  
TAAGCTTATCCAGGCTCCATGCCTTGCATATCCAGAAGGTGGAAAACCTTCTATAT  
CGAAACAGGTTTTACCAACAAAAGTGTAAGTGCGGTTCTTTTCCAAAAACAAGAAA  
AACTGAATAAAAATAATCGCTTATGCCAGCAAGTCGTTATCATCAGTTGAAATAAAAT  
TTAATAACTGTGAAAAAGCATTATTAGCAACTGTATGGGCTTTGCAATATTTTCAGGA  
GTTTTATTCAAGGTGAAAAGATAATTGTGGAACTGCACATCAATCACTACAATATT  
TACAGAGTGGTTCGATTAAGGATGGAAACCTGTCAAATAGTAGGATAACTGCATGG  
ACAATGTCCTTATGGGATGGCCATTGGAGATCAGATATAAACAGGATACTAAAA  
TCCAGTTGCTCAAGGATTAGCTGAACTCCATGATTGTATTAATGTTGAACACAAAGA  
TGAGTCACCAGAAAATGACTTTCTGGAGGAACAATCACTATCTCCATATAAATCATA  
TGAAGAAGAATACTGCAAATCATTACCATGTGTATATGTTGATGGCTGTTCTTTCCA  
TACAGAAGAAGCTGAAAAGATGCTAGTTGCAGGTATTGGGATAGTATGGAATAATA  
TATTCCCAGAGATATCCACAGGATACAAGATTGGTTCCAAAAGTAGCCAAGTCGCA  
GAGCTTGCTGCTGTGTACAAAGCCGTACAAATGGCTATTGAATATGATATTAAGAA  
TTTGTTTTAATTACAGATTCCGATTATGTTTCGGAACAGCTTTGTGGAATATTTTCCCG  
GATGGAAAAGATCCAATATGATGAGAAGTAATAAGAAACCAGTCAAACATGGTAAG  
TTGTTTTGTAAAATCGATGAATTAGTTACTACCCACGGCCTTAACATATATTGGAAG  
AAGGTAAGGGGTCATTCGAAACATCCAGGTGCAGATAAAGATGGAAATGACTTAGC  
AGATTCCCTTGCCAAGAAAGCAGCCATGGAGGGAGAGATCTTGGATATTGATGACC  
TCATGGGAACTATCCAAGTGAATGCCACAACCAGGAGTCAGACCCAAAAGGAATCT  
CAACCTAATGTGGCAATGTGGAGCCAAGATTCCCCTAGCGAAGATCTCATTGAGAGT  
CAGAAAGGGGATCCTATTATTGGTTTTATTTATAAATATATTCAAATCCAAGGAT  
CATCCATAACCATGGAAGAATGTGCTGATAAAGAGGAGTTACGTATTTTGGTGAA  
AGGCGAGTCCCAATTTTCATTACAAGATGGATTGCTGATACGAACCTCGAAAAATGG  
TATTACACAATGGGTAGTACCCGCAGCATATCGGGGTTTGATGTTACAACATGCTCA  
TGATGCCCCGACAGCTGGTCATCGAGGAGAGAAAATAACATATGAATTGTTAAGGG  
ATTATGCTTATTGGCCACACATGTTACAGGATGTCAGGACTTATTGTCAAGGATGTT  
TGATATGTCTCAATTCCAGCCACAAGGACCCAATCACCGGGCACCGCTGATGAAA  
AGAGGAATATCCATGCCATGGTCAGACCTCAAATTTGATTTTCATTGGACCAGTAACA  
ACATCCTCAAAGGAAACCGGTATATGCTAACTGTAACCTGTTTTATTTACAAAATGG  
GTAGAATGTTTGCCATGCAAGACGTGTAGTTCTAGTGTATGCGCATCACTGCTCATT  
AACCATATATTTTCCAGATTTGGTCTTCCCCAACGTATTGAATCTGACCGCGGAAGT  
CACTTCACCAGCGAAGTAATGACTAAGATGTGGGAAATTCTAGGAGTAAAAAGGAA  
GCTACACATAGCTTACAGACCAGCTTCTAGTGGTGGAGTAGAGCGTTACAATCAATC  
AATCATAAACATTCTGAAAAAGTTTGTCAAAGAATCTGGTAAAGACTGGGATGTCA

AATTACCACTAGTTCTCATGGCTATTAGAGCCACCCCGAGTGCGGCAACCAAAAATTT  
CTCCATTTGAGATGATTACGGGTAGAAAAATGGTATTACCTCAACATCTACTTTATA  
GAACCACAGATCACAATTTGATGAATGCAATGACTGCACATCAATATGTAGAAAAT  
TTACGAAAGCATCTACAGCATGCTTTTTCGTTTGTCTCAAAGAAATATTGAGAAAGCT  
GCAGTAAGTACGAAAACGTACTATGATCTAAAAACAACCTCAAAGGAATATCAGGT  
TGATGATAAAGTTTATCTTTATAACTTTGCCAGAGACCAAGTAAAGGAAAGGAAATT  
CTTACCTTCCTGAAAAGGTCCATATATAATCACTGATAAATTATCTCCTGTGGTTTAT  
AAAGTTAAAATTCCTAAGGGGGATGATTTTGTGAAAAATGGGTGCACATTAACCA  
ATTACGTGTTTGTTCATCCTAGCCAACAGCTTCGGAGAATAGAGCAAGTCGAGAGCTG  
A

>Loki-Xtr consensus sequence Spc7-Gag-Pol polyprotein

MSVASSENGNTPEQMIHRIVEFIYTRVKFDIGMDVWINDLKRNRADLNDIWATDGLVE  
RYLTCMNLASNSSDKEKLLICALPPVLYALMEVDTLKARKENVEKLRSQLHEIESDIQH  
MKSDKNQLEIDISNKEAFIRDLETDAERSRIAYCKLRKDFEELQQQHIKSQQSGVYGVER  
SPDPPIITPQYKNWAPYISRAKPIDNV DSEAQDVLGRLAEACQAVTTLIGNHRTRVLRDS  
SSDTPSPERNVRNVRNQT PMSNVSHRSSVSNTDASEVESDERAWGSGPFPNRGKNTHKR  
GSKGKNPQSPKEKQNSASIIKFLNTAIPKFSKKGSSQIANHLELYESTMDSLKLSEADKIR  
FLPWFDDRYRHYFSSFKERGITKWQSVLHEIKSEFGPYRTTTAAKREIYKLTCSRNSQP  
REFLSVLKNAAYGLAYRNPDWESVEFKQVFYEALPTQIKLSLAHDLDFENPLERLVT SAT  
LLFNISEGQNLNDRKFKKFPEHNVD ESVGKPHLNFESQPKKIP SATGPNQQNQKQLNPR  
QTKPQIAKGSEGNSSGSGSQGYRPRFNQGYQGYRGNQRYGGYQGYRGNQRYGGYQGY  
RDPQGYRRWNNRPRQQWRKGGQESPDSPRGKSPTGNQNGPRNQNPGRPSRFDQLADQV  
SKLTDIVSKLSQVSAGKQPEVFFRGKSGAKLRQIKEAEPNCYMEMDRKELNTVNDHVL  
HCPDPEFRAGK GKSNISSVLQPNKDNSYNPVLFEVPVCEVPSVQSVPLIESIGTQMPCRQN  
KEEQSPNILTQRDHFLNQMIKHSNFLCNLLQLDGRYFIDICLQDGCVGP IQGLLDTGS  
QVTILSFSYFQQILESSKNKPRLTVFDGSLVSVGGDSLQVKGKSWLTYKIGKKTIRHPTLI  
VDLPYDRLIIGIDLLKRLRSIIDFINEAIWTQVKTPISFERSHNAKPQNSCHMIEERPNSVEI  
HFRNSQVPDVSILKNGKPEESINTSFHIINI QKD KIEKIILEDVLTISLKGGNRE VAGITRHI  
QSLVKIEKTN DTMLVPVQVNNIARVKYAKLDL KSEVSYISLGLLKQVTNPQMIKFSSLQE  
WVYDLDKDDQSQNVIAKCILSISLGNKSAEHVFNVLKEPQYQMYLGN DIIHRFAIQVDLI  
NNVLWSRLSGNPEEFQDKEQALRWGQRIPYAVDILVAGKVKVPGGCKSFLLP IRVKKG  
QKLRNPDALICLSNRMQQFGLKVKPNPIINI HQDPLYMVIDNMSPYNIMLQEDTMIGLAI  
DSEYYTFGFQNDIIGLIPDEYLTEE QMVDQHCFSTPEGLFSIHSVYPFNPEDGTCYVEETS  
LIFNHEIEKGEYESFQQGKDQIYHTPDDLTSKLEEAYEVNQPEIFPEFQERVEEQLSIADA  
CSDSERQQLKELFWEFQDMFAKDSYDCGETNLHVTRIQTDPDAPPVFIKQYRLPLAAY  
ESLSEIVKNLEKKGIIRPVHSSFNHPILGVLKPNGQFRLCSDLRQLNKQVYMSGWPVPYI  
DQCLAQIQGSKIFTALDCAQGYWTIKIDERDQYKLAFTFGKQQYAWTRLPFGYINAGHE  
FAVFMHKAMPDAAERGTL SYVDDILIKSTTFGEHIAELRYVLNQLKKAGVKLSLQKAQ  
WCRSKVNFLGHEITAEGINPQEDRSWV?MNYSRKFIDNYAEITKPLLQLLKKGAKWKW  
DECHDQAISELKTKLIQAPCLAYPEGGKPFYIETGFTNKSVS AVLFQKQEKLNKIIAYASK  
SLSSVEIKFNCEKALLATVWALQYFRSFIQGEKIIVETAHQSLQYLQSGRLKDG NLSNS  
RITAWTMSLMGWPLEIRYKQDTKNPVAQGLAELHDCINVEHKDESPENDFLEEQLSPY  
KSYEEEYCKSLPCVYVDGCSFHTEEA EKMLVAGIGIVWNNIFPEISTGYKIGSKSSQVAE  
LAAVYKAVQMAIEYDIKEFVLITDSYVRNSFVEYFPGWKRSNMMRSNKKPVKHGKLF  
CKIDELVTTHGLNIYWKVRGHSKHPGADKDGNDLADSLAKKAAMEGEILDIDDLMGT  
IQVNATTRSQTQKESQPNVAMWSQDSPSEDLIESQKGDPIIGLFYKYIQNPKDHPITMEEC

ADKEELRILVKGESQFSLQDGLLIRTSKNGITQWVVPAAAYRGLMLQHAHDAPTAGHRG  
EKITYELLRDYAYWPHMLQDVRTYCYGCLICPQFQPQGNHRAPLMKRGISMPWSDLQ  
IDFIGPVTTSSKGNRYMLTVTCLFTKWVECLPCKTCSSVCASLLINHIFSRFGLPQRIESD  
RGSHTSEVMTKMWEILGVKRKLHIA YRPASSGGVERYNQSIINILKKFVKESGKDWDV  
KLPLVLMAIRATPSAATKISPFEMITGRKMVLPQHLLYRTTDHNLNMAMTAHQYVENL  
RKHLQHAFAFAQRNIEKAAVSTKTYDYDLKTTQKEYQVDDKVLYLNFARDQVKERKFL  
PSWKGPYIITDKLSPVVYKVKIPKGDFFVEKWVHINQLRVCHPSQQLRRIEQVES\*

>Loki-Xtr consensus sequence *env* gene

ATGCCATCCAAGATGATCGCTATTTTATATGCAGTCCTGATCTTGGGGAAAGAGTTA  
CACGCTGAGCGGATTGTGATGCCAGGTCCATCATCCGGGATCATGCTACAGGATACA  
GCGGGATTTCATCATGACCAACAAGAGAATCTTGTCCCAGAAGATTTATATGAGCCTA  
GATCCACGTTGTGTCATCGAAAGACAAGTCAACGTATCCAATATTCGATCACCGGAG  
ATTCAAACCTGGTACCAGCTGCATATTGAATATTCACAAAAGCGGATTACTCAAATC  
CTGGAGCAAACCCGGAAAACCTTTAATCAGAGAGCCTTTTTTCGTCAAACCAAAGACC  
AAAACGGTTCATTTCTGCTATTGTTGCTGCTATAATCTTTGCAGTAGTAGGAAACGT  
GTTTGCAACCGGAGTAACAATCGCTAATTCATATCCCTTAAAACCATGGAATCTGA  
GATTAATTCATTA AAAACTAATTTACAACATATTCATGTGGAGATGGAAAGACAAA  
AGAAAGATTTAACAGACTTGTATACCGTTGTGGAAGACACTGTCATTGCTACGAACT  
TGCACTCTAAATTATTA AACCACTCGATAAATCTTCACCAAAGTCATGAACTGTTA  
AACAAGAACTGATTTTGCTAAAGGAGCGTATCGACTTTCAACTTCAAGTTTTCCATG  
ACGAGGTGCAAAGTGGAATGCAAGACCTGAGAGAAGGGCGAATTCCTCTCTATTTT  
GTATCATACGAGATTATTCGCAAGATGTTACAAAATGCAGATGGAGATAAAGTAGA  
GGATATCCAAATGAACTTAGCGTTTAATATGGGAGTTGCCATACCATTATACATTGA  
TCCTGTTAAAATGGAAATCTGCTTTTTACTATCAATTCCAGTGGTCAATAGGAACAA  
TATATTTCAAATGAAAAAATCCACAATGTAGGTACATGGAGAGATAATATTCATGT  
TAAGATCCAAACCCCTGATATCGTGGCATATCAATCTTGGAGACCGGACTGGCTATC  
TGTTCCATTCTAAATAATTGTGCAATTTTTAGAGATAATAACTTTCAATGTGAAGGT  
GACCCATTTAATTATGATACTAATAATGCTTTGTGCGGACTTGACTTTGAGAAACAT  
GGATCAGAAAAATGCCAGGTA ACTTTGTCTAAAATCGAGGAGAAAGATTGGGTGAA  
TGCAGTTTTAATAAAAAGACAAATGGCTCGTTAGTACTCGTTTACCTGACCTAACTGT  
TTTTTCTAAGGACCACATTATGGCAAAAATTATTGCTATACCAACTCATGTATCGATT  
ATCAAAGTACCCCTAATTCAGAGTTGTAATTGGAAATCGCACATTATATCCTGTA  
AACATTGAGGACACTGAAGGAGAGGTGGAAGCATTGATGCATTCCAAAATCAGGA  
GATTACCATAAGTCCGGATTTAAAATTTTTGTTGGACAATAAGCCCAGCCATACCAT  
CCGTATGGTTATAAAAAAACATAATATCACCATGGATACTCCACAATTTTCACCAAC  
CGATGACGAAATACTGTTTCCTTCTGTTTGGTTCATGGGGGGAAAACCTATATATGGAG  
TATATTGATCACAATTATAGTAGGATGGTTAACTGTAATCACCATCTTAGCAATTCG  
TTGGATGAAGATCATCAAAAAGACTCTAGATAAACTATGGCTTAAATCTCGCCGATC  
AAGTTTACATAATGAGTATGATGAAGGAAGAGTTTGA

>Loki-Xtr consensus sequence Env protein

MPSKMIAILYAVLILGKELHAERIVMPGPSSGIMLQDTAGFIMTNKRILSQKIYMSLDPRC  
VIERQVNVSNIRSPEIQTWYQLHIEYSQKRITQILEQTRKTLIREPFSSNQRPKRFISAIVAA  
IIFAVVGNVFATGVTIANSISLKTMESEINSLKTNLQHIHVEMERQKKDLTDLYTVVEDT  
VIATNLHSLKLNHSINLHQSHELFKQELILLKERIDFQLQVFHDEVQSGMQDLREGRIPLY  
FVSYEIIRKMLQNADGDKVEDIQMNLAFNMGVAIPLYIDPVKMEICFLLSIPVVNRNIF  
QMKKIHNVGTWRDNIHVKIQTDPDIVAYQSWRPDWLSVPILNNCAIFRDNNFQCEGDPFN

YDTTNALCGLDFEKHGSEKCQVTL SKIEEKDWVNAVLIKDKWL VSTRLPDLTVFSKDHI  
MAKIIAIPTHVSIK VPPNSRVVIGNRTL YPVNIEDTEGEVESIDAFQNQEITISPDLKFLLD  
NKPSHTIRMVIKKHNITMDTPQFSPTDDEILFPSVWSWGENYIWSILITHVIGWLTVITILAI  
RWMKIIKKTLDKLWLKSRSSLHNEYDEGRV\*

**Dataset S2.** RT protein alignment generated by Mafft 7.402 and used to reconstruct the phylogenetic tree in Fig. S3.

>Loki-Xla  
QYRLPLAAYESLSEIVKNELEKKGIIRPVHSSFNHPILGVLPNGQFRLCSDLR-----  
QLNKRVMYMSGWVPPYIDQCLAQIQGSK-IFTALDCAQGYWTIKIDERDQHKLAFTF-----  
GKQQYAWTRLPGFYINAGHEFAVFMHKAMPD-----AAERGTLASYVDDILIKSTTFEEHIAELKYVL-----  
KLSLQKAQWCRSKVNFGLGHEVTAEGINPQKKKVEAIKNTKSPTNLKELRSFLGMMNYSRKFIDNYAEITKPLLQLLKKG  
A---KWEW  
>Loki-Xtr  
QYRLPLAAYESLSEIVKNELEKKGIIRPVHSSFNHPILGVLPNGQFRLCSDLR-----  
QLNKQVYMSGWVPPYIDQCLAQIQGSK-IFTALDCAQGYWTIKIDERDQYKLAFTF-----  
GKQQYAWTRLPGFYINAGHEFAVFMHKAMPD-----  
AAERGTLASYVDDILIKSTTFEGEHAELRYVNLQKAGVKLSLQKAQWCRSKVNFGLGHEITAEGINPQ-----  
-VMNYSRKFIDNYAEITKPLLQLLKKGA---KWKW  
>Loki-Npa  
QYRLPLACYDSLAEIIRNLKERGVIRSVHSSYNPILGILKPNGQWRLCADLR-----  
QLNKRVMYMSGWVPPYIDQCLVQMQGAR-IFTTLDCAQGYWTIKVSPEDQYKLAFTF-----  
GKEQYTWTRMPFGYINSGHEFAVFLHKAMPD-----  
ATERGNLTYVDDILIKSTSFKEKHVQEIRHVLNQLREAGVKISLQKAQWCRTKVNFLGHEVTSEGLNPQKKKVEAVMKS  
KTPTNVSELRSFLGMMNYSRKFIDNYAEISKPLLTLKKDV---PMMW  
>Loki-Rca  
QYRLPLASYESLAEIIRKLHERGIIRPIHSSYNHPILGILKPNGQWRLCADLR-----QLNKRVMYMSGWVPPYIDQCLAQLQ-  
SQ-VFSALDCAQGYWTIKVSEEDQYKLAFSF-----GNQQYCWVRMPFGYINSGHEFAVFMHKAMPD-----  
ALERGTLAYVDDILIKSTDMTKHLTEL RHILGQLR-  
AGVKLSIQKAQWCRTRVNFGLGHEVTSEGLNPQKKKVEAVFNCKVPTNLKELRSFLGMVNYSRKFIDNYAEISKPLLHL  
KKDT---EWSW  
>Loki-Ape  
QYKIPLAAYESIQEILDKLLEKRIVRECSTYNSPIWGALKPTGKWRLTIDYR-----  
PLNKQVPLSRWPMIHLAQELAKVKEAR-FFSTVDVANGFWTMTVDPVDQYKLAFSF-----  
CNRQYTWNRCPFGYNSPAEFNIFLHKAMSD-----  
ASARGNLIYVDDILMRSRSDHDLAEIRHVLGQLAAAGAKLAIAGQWCRTKVEYVGLTVGANGIEPKAERIRAIQDIM  
APVNVSKLQSFGLVCNYSRQFIADYAEIARPLTELLGKDK---PFLW  
>Loki-Pfl  
QYKIPLAAYESIQEILDKLLEKQIVRECSTYNSPIWPVLKPTGKWRLTIDYR-----  
PLNKQVPLSRWPMIHLAQELAKVKEAR-FFSTVDVANGFWTMRVDPVDQYKLAFSF-----  
CNRQYTWNRCPFGYNSPAEFNIFLHKAMSD-----  
ASARGNLIYVDDILMRSRSDFEHLAEIRHILGQLAAAGAKLAITKGQWCRTKVEYVGLTVGANGIEPKAERMRAIQDIM  
APVNVSKLRSFLGVCNYSRQFIADYAEIARPLTELLGKDK---PFLW  
>Loki-Pyo  
QYKIPLAAYESIQDILDITLLEKRIIRECNSTYNSPIWPVLKPTGKWRLTIDYR-----  
PLNKQVPLSRWPMIHLAQELAKVKGAT-FFSTVDVANGFWTMKVDQADQYKLAFSF-----  
GGSQYTWNRCPFGYNSPSEFNIFLHKAMSD-----  
AATRGNLIYVDDILMRSQTFEDHITEIRHVLTLQSNAGAKLALTKGQWCRTKVKYVGLTVGADGIEPQAGRIRAIQDIK  
APTRLTELSFLGVCNYSRQFIADYAEIARPLNELLHKDK---PFEW  
>Loki-Sau  
QYRIPLAAYESIQDILDKLLQKQIIRECNSTYNSPIWPVLKPTGKWRLTIDYR-----  
PLNKQVPLSRWPMIHLAQELAKVKGAC-FFSTVDIANGFWTMKVDPADQYKLAFSF-----  
CNRQYTWNRCPFGYNSPAEFNIFLHKAMSD-----  
AAARGNLIYVDDILMRSCTFETHLAEIRHVLNQLTRAGAKLAIAGQWCRTKVEYVGLTVGGSGIEPQTGRIRAIQDIKA  
PTNVSELRSFLGVCNYSRQFIADYAEIARPLTELLCKDK---LFQW  
>Loki-Ofa  
QYRIPLAAYESIQEILDNLLQKQIIRECNSTYNSPIWPVLKPTGKWRLTIDYR-----  
PLNKQVPLSRWPMIHLAQELAKVKGAC-FFSTVDVANGFWTMRVNPADQYKLAFSF-----  
GNRQFTWNRCPFGYNSPAEFNIFLHKAMSD-----AAARGNLIYVDDILMRSRTLE-  
HLAEIRHVLNQLSAAGAKLAIAGQWCRTKVEYVGLTVGADGIEPQAGRIRAIQDIKAPTGVSELRSFLGVCNYSRQFIE  
DYAEIARPLTELLRDKDK---SFEW  
>Loki-Bsp  
QYRIPLAAYESIQEILDITLLKKEIIRECNSTYNSPIWPVLKPTGKWRLTIDYR-----  
PLNKVPLSRWPMIHLAQELAKIKDAH-FFSTVDVANGFWTMRVDPADQYKLAFSF-----  
GNRQYTWNRCPFGYNSPAEFNIFLHKAMSD-----

AAARGNLIYVDDILMRSQTFEGHLAEIRHVLSQLLAAGAKLALTKGQWCRTKVKYVGLTVGQHIEPQADRIQAIKTIK  
 APNTLSGLRSFLGVCNYSRQFVEDYAEIARPLTELLRNDT----PYIW  
 >Loki-Cne  
 QYKIPLAAYGSIQEILNKLEKNIIRECNSTYNSPIWPVLKPTGKWRLTIDYR-----  
 ALNKQVPLSRWPMIHLDDQELAKVKDAR-FFSTVDVANGFWTMKVDPADRYKLAFSF-----GNRQY--  
 NRCPFYNSPAEFNIFLHKAMSD-----ATERGNLIYVDDILMRSRTFKEHLEEL-  
 HVLGQLAAAGAKLALSKGQWCRKKVDYVGLTVGPNGIEPQADRIRAIQDIAAPTNLSELRSFLGVCNYSRQFIEDYAD  
 MARPLTELLRKNK----PFDL  
 >Loki-Lch  
 QYRIPLSSYESVQEILHTLMEREIIRECNSTYNSPIWPVLKPNGKWRLTIDYR-----  
 QLNKQVPLSHWPMTYLDQNLTKIAGAK-YFTTLDIANGFWTVKVDPKDQYKLAFSF-----  
 GKRQYTNRCPFYNSPADFNIFLHKAMPD-----  
 AEERGNLIYVDDILIKSNSASDHLEIRYVLTQLKNAGAKLSLTKGQWCRKRVNYLGYDVGPDGLRPQQNRKAIQAIR  
 SPTNITELRSFLGVCNYSRQFIENYAEISQPLTKLLRKNK----PWVW  
 >Loki-Str  
 QYKIPLAAYAAVQEIISLLAKRIIRECNSTYSAPVWPVLKPTGKWRLTIDYR-----  
 QLNKL VPLSRWPMTQLDQELPKVANAK-YFSTVDVANGFWTMTVDPRDQHKLAFSF-----  
 SNKLFNFRCPFYNSPSEFNIFLHKAMPD-----  
 AASRGTIYVDDVLMRSETWSHHLNEMDHVLTQLGTAGAKLAIMKGQWCRTKVNYVGLLVGAEGILPQSNRIQAVRNI  
 KPTNLHEVRSFLGVCNYSRQFIENYADLSKPLTHLLQKDT----PFVW  
 >Loki-Tfu  
 QYKIPLSYEPVQEIINSMLEKGVIRLCNSTCSAPIWPVLTPNGKWRPTIDYR-----  
 KLNQVPLSRWPMTQLEQEIPRVKAT-IFSTLDVASGFWTIPVHPDDQHKLAFMF-----CNR-  
 YFTTRCPFGYNSPAEFNIFLNKACPD-----  
 ARVRGNLIYVDDVLMKSTTMDHLKEIDHVLQQLTKAGAKIALHKGQWCKTKVNYVGLIAPQGIERQTNRIQAIQNI  
 KPPANISELRSFLGVCNYSRQFIENYADLSKPLTHLLQKDT----PFVW  
 >Loki-Lro  
 QYKIPLSYEPVQDIITSMLEKGVIRPCNSTYSAPIWPVLKPNGKWRPTIDYR-----  
 KLNQVPLSRWPMTQLEQEIPRIRGAT-IFSTLDVASGFWTIPVHPDDQHKLAFRF-----  
 DNRQYFTTRCPFGYNSPAEFNIFLNKACPD-----  
 ARVRGNLIVDDILKHTTVADHLKEIDHILNQLTTAGAKIALHKGQWCKIKVNYVGLLIGPQGIEPQTNRIQAIQNIKPP  
 ANVSELRSFLGVCNYSRQFIENYSDIARPLTALLKKDC----PFIW  
 >Loki-Dcl  
 QYKIPLSYEPVQEIISMLEKGVIRPCNSTYSAPIWPVLKPNGKWRPTIDYR-----  
 KLNQVPLSRWPMTQLEQEIPRIRGAT-IFSTLDVASGFWTIPVHPDDQHKLAFTF-----  
 SNRQYFTTRCPFGYNSPAEFNIFLNKACPD-----  
 ARVRGNLIYVDDVLMKSMVTADHLKEIDHVLHQLTAAGAKIALHKGQWGKSKVNYVGLLIGPQGIEPQSSRIQAIQTIK  
 PPVNVSELRSFLGVCNYSRQFIENYSDIARPLTLLKKDC----PFAW  
 >Loki-Sri  
 QYKIPLASYEPVQEIIDNLEKGIIRPCNSTYSAPLWPVLKPNGKWRLTIDYR-----  
 KLNQVPLSRWPMTQLEQELPKIRDAK-YFSTLDIASGFWTIPVHVADQHKLAFTF-----  
 ANRQYFTTRCPFGYNSPAEFNIFLNKACPD-----  
 ANDRGTLIYVDDILMRSSTLDTHLEEIDHVLEQLTAAGAKISLSKQWCKTKVNYVGLLVGPRGVEPQINRVQGVNTIK  
 APTNVSELRSFLGVCNYSRQFIENYADLAKPLTELLRKNK----LFWW  
 >Loki-Sme  
 QYKIPLASYEPVQEIIDDLHRGIIRPCNSTYSAPVWPVLKPNGKWRLTIDYR-----  
 KLNQVPLSRWPMTQLNQELPKVKDAK-YFSSMDIASGFWTIPVHIADQHKLAFTF-----  
 AGRQYFTTRCPFGYNSPAEFNIFLNKSCPD-----  
 ASERGTLIYVDDILIRTPMTKGHIDEIEHVLDQLTTAGAKISLSKQWCKTKVNYVGLLVGSNGVEPQTNRVQGVMNK  
 TPTNISELRSFLGVCNYSRQFIPDFADIAKPLTDLKKDC----LFTF  
 >Loki-Oja  
 QYKIPLASYEPVQEIIDDLTKGIIRPCNSTYSAPIWPVRKPNGKWRLTIDYR-----  
 RLNQVPLSRWPMTQLEQELPRVKEAK-YFSTLDVASGFWTIPVHPDDQHKLAFTF-----  
 ARQQYFTTRCPFGYNSPAEFNIFLNKACPD-----  
 ATQRGTLIYVDDILIRNATLEDHIEIEHVLEQLTSAGAKISLSKQWCRKTKVNYVGLLVGPTGVQPQVGRVQGLKDIAA  
 PTNLKELRSFLGVCNYSRQFIEDYADIAKPLTELLKQDV----PFRW  
 >Loki-Ame  
 QYKIPLASYGPVQEIIDDLTKGIIRPCNSTYSAPLWPVLKPNGKWRLTIDYR-----  
 RLNDQVPLSRWPMTQLEQELPRVRDAK-YFSTLDVASGFWTIPVHVEDQHKLAFTF-----  
 AGRQYFTTRCPFGYNSPAEFNIFLNKACPD-----  
 ARERGTLIYVDDVLRNNSLDAHLEEIDHVLDQLTKAGAKISLAKQWCKTKVNYVGLLVGPDGVLPPCRAQGIVDIA  
 EPKTIHALRSFLGVCNYSRQFIENFAELAKPLYQLLKQDV----PFIW

>Loki-Bpe

QYKIPLASYEPIQEIIDLLTKGVIRPCNSTYSAPIWPVLKPNGKWRLTVDYR-----  
QLNTRVPLSRWPMTQLGQDLPKVRDAK-YFSTLDIASGFWTIPVHPDDQHKLAFSF-----  
ANRQYTFTRCPFGLANSPAEFNIFLNKACPN-----  
AASRGTLIYVDDILIRTTLDHDLKEIDHVLDQLTSAGAKISLSKCQWCKTKVNYVGLL-----  
RSSRIQGITNLKVPANVSELRSFLGVCNYSRQFVEHYAELAKPLTDLLKKDE---TFSW

>Loki-Lca

QYKIPLAAYESIQUETLENLLKKNIRECNSTYNSPIWPVLKPTGKWRLTIDYR-----  
QLNKTVPPLSRWMAEIDHGLNQIKGAK-VLTMDLANGFWTMPVKETDQYKLAFTF-----  
DRIQYTNWRCPFYGYSNSPADFNIFLHKAMGD-----  
AKERGTIVYVDDILVKDSSWQEHLKSLQHTLEQLKEAGAKISIQKGQWARKRVDYLGFIQTEGLLPQTNRIEALLALK  
SPNTVPTLRSFLGICNYLRQFVDDYAGITRPLVKLLQKDE---PWEW

>Loki-Pma

QYKIPLAAYESIQUETLENLLKKNIRKCNSTYNSPIWPVLKPTGKWRLTIDYR-----  
QLNKTVPPLSRWMAEIDQNLNQIKGAK-ILTTMDLSN-FWTMPVKEADQYKL--TF-----NGIQYTNWRCPFYGYSNSPAD-  
NIFLHKAMGD-----AKERGTIVYVDDILVKDSSWEEHLESQHTLEQLE--  
AAKISIQKGQWARKRVDYLGFIQGT-  
GMLPQTKRLEALLALKPPTTVTTLRSFLGICNYLRQFVDDYAGIARPLVKLLQKDE---PWEW

>Loki-Aro

KYRIPIAAHDPVQDITTEILHAGIIRKCNSTYNSPIWPVLKPSGKQSLTVDYR-----KLNKQVPLSRCLWPTWMKPLQK-  
SRMP-HTSQADISNGFCTIPVREQDQHKLAFSF-----NNVQ-TWTVTPFGYANSPAEFNIFHKAIPD-----  
VNSKNIAIYVDDILMWSDSWGEHQQLLSYVLRSLQAGAKISLDKGQWCKRAVNYLGFQVGGDGIRP---  
RTEAPKAIPAPTTLQKCSFLGICNFSQHFVADYAKISQPLTRLLKKDV---PWTW

>KoRV

QYPMSKEAREGIRPHIQRFDLGILVPCQSPWNTPLLVKKPTNDYRPVQDLR-----  
EVNKRVDIHTVTPNPYNLLSSLPSHT-WYSVLDLKDFAFFCLKHPNSQPLFAFEWRDPEKG-  
NTGQLTWTRLPQGFKNSPTLFDEALHRDLASFRA-----  
LNPQVVMQLQYVDDLLVAAPTYRDCKEGTRRLQELSKLGYRVSAKKAQLCREEVTYLGYLLKGGKRWLTPARKATV  
MKIPTPTPRQVREFLGTAGFCRLWIPGFAELAAPLYPLTREKV---PFTW

>MuLV

QYPMSQEARELGKPHIQRLDQGILVPCQSPWNTPLLVKKPTNDYRPVQDLR-----  
EVNKRVEDIHTVTPNPYNLLSGLPSHQ-WYTVLDLKDFAFFCLRLHPTSQSLFAFEWRDPEMG-  
ISGQLTWTRLPQGFKNSPTLFDEALHRDLADFRI-----  
QHPDLILLQYVDDLLAATSELDCCQGTALLQTLGDLGYRASAKKAQICQKQVKYLYGILLKEGQRWLTEARKETVM  
GQPTPKTPRQLREFLGTAGFCRLWIPGFAELAAPLYPLTKTGT---LFEW

>FLV

QYPMPEHAYQGKPHIRMLDQGILKPCQSPWNTPLLVKKPTEDYRPVQDLR-----  
EVNKRVEDIHTVTPNPYNLLSTLPSHP-WYTVLDLKDFAFFCLRLHSESQSLFAFEWRDPEIG-  
LSGQLTWTRLPQGFKNSPTLFDEALHSDLADFRV-----  
RYPALVLLQYVDDLLAAATRTECLEGTALLETGNKGYRASAKKAQICLQEVTYLGYSLKDGQRWLTKARKEAILS  
IPVPKNSRQVREFLGTAGYCRWLWIPGFAELAAPLYPLTRPGT---LFQW

>REV

QYPITLAKRSLRETIHKFRAAGILRPVHSPWNTPLLVRKSTSEYRMVQDLR-----  
EVNKRVEIHTVTPNPYTLLSLLPDRI-WYSVLDLKDFAFFCIPLAPESQLIFAFEWADAEEG-  
ESGQLTWTRLPQGFKNSPTLFDVALNRDLQGFRL-----  
DHPSVLLQYVDDLLAADTQAACLSATRDLMLTAEELGYRVSGKKAQLCQEEVTYLGFKIHKGSRSLSNSRTQAILQIP  
VPKTKRQVREFLGTIGYCRWLWIPGFAELAAPLYAATRGGND---PLVW

>WDSV

QYPLPKDKTEGLRPLISSLENQGILKCHSPCNTPIFPIKKARDEYRMIHDLR-----  
AINNIVAPLTAVVASPTTVLSNLPSLH-WFTVIDLSNAFFSVPIHKDSQYLFAFTF-----  
EGHQYTWTVLPQGFHSPFLFSQALYQSLHK-----  
IKSSEICIMDDVLIASKDRDNLKDTAVMLQHLASEGHKVSKKKLQLCQQEVVYLGQLLTPEGRKILPDRKVTVSQFQ  
QPTTIRQIRAFGLVGYCRHWIPEFSIHSKFLEKQLKKDTA--EPFQL

>Xen-1

QYPLKPAQSESINKQLQTLLENGAIKRQSSPCNTPLFPVKEKKDKYRLVQDLR-----  
AVNEATVMEITPLVSNPHITLGSIPAT-HFRAVDLTNAFYSIPLREDCQYLFAFTH-----  
ERQYVWTVLPQGAQNSPHTFSLALTSILDS-----  
HPEITLLQYVDDLLLCAPDLPTCEASSTDLLSFLADQGCKASKEKLQWCQTTVVFLGQCISQGTRHITEGRIKTLQDIPLP  
KGHKPLHAFLGLISYCRSWIPEASLLMQPLYDVVKSD---PFTM

>SnRV

QYPVPDASHASIKETVEALLEQGVLKCNSTVNSAIWPVGKPDGSWRLTIDYR-----  
PLNSAVSCPYPVASTPELFAKLLKQYQ-VYSSLDISNGFWSIRLEECCQYLFAFTF-----



DTQQYTWTRLPGGFHASPGIFHQALYNGLAS-----  
 SQGCKLLQYVDDILLMSEDRDHHLRSLAILLQGLKDLGVKINPKKSHFCKDQVQYLVGNVVGADTRSLIDARSQRLRTLDI  
 PLTVQGLRSALGLNFNCRAWIPEFSRKTQSLYDMLKGDCK---KLLK  
 >ZFERV-2  
 QYPINKSALPEIKITIEELKRKGIIEVNAPTNSPIQAVAKPDGGWRLVTNYK-----  
 ALNKQTPDTRYLINARDATGAPEGR-LLSKIDLANGFWSVPLKPESRARTAFTH-----  
 ENKQYVYVNLVLPQGFKNPNAFQAIMMEILKG-----  
 LPIVVYIDDILVITNDEEEHLKILDETL SRLTKEGFRNLNKKMEIAKDDVEFLGFQITGNERFLSQTTENKLELRGETTLK  
 QLQSMGLGTLNFVRDLIPGYARHAKPLYNATKGGV----LTW  
 >AciFLERV  
 QYPLNPGAVKEMDLIVRELLTLGVIRQELNPTNSPIQAVKKPEGGWWRPVINFK-----  
 ALNRRTVANRASLINPQGTLKTLKLP-FKSCIDLANGFFSLRLTRGSQGKTAFTH-----  
 KGRSYVWERLPQGYKNSPNVFOAAVMDVLDG-----  
 LGATIYIDVFIADDTEEQHLDRQLKIVERLTAAGLKLNLKCKQFGRKRVLDYLGQVSD-  
 LGLSEVYRKKIEQIEPPSSLNELQKVLGCLNYVRDYPGYQRYAKPLYAKLKKPDE--AAWNW  
 >AliFLERV  
 QYPLHPEAVAEMDKIVKELHALGIREEPNPTNSPIQAVKKPEGGWWRPVINFK-----  
 ALNRRTVANRASLINPQGALKTLRVKK-YKSCIDLANGFFSLRLARESQGKTAFTH-----  
 KGKSYVWQRLPQGYRNSPNVFOASVLEILED-----  
 VGASVYIDVFIADDTEEEHLKRLEEVVKRISAAGLKLNLAKCQFQKVNLYLGQVTTD-  
 LGLSDGYREKIQIQPPRCENDLQKILGCLNYVRDHPVNYQKYAKPLYACLKKEAT--KAWSW  
 >FFV  
 QYHINPKAKPDIQIVINDLLKQGVLIQKESTMNTPVYVVPKPNGRWRMVLVDYR-----  
 AVNKVTPLIAVQNHQSYGILGSLFKGR-YKTTIDLNGFWAHPVIVPEYWITAFTH-----  
 QGKQYCWTVLPQGFNLSPGLFTGDVVDLLQG-----IPN--  
 VEVYVDDVYISHDSEKEHLEYLDILFNRLKEAGYIISLKKSNANSIVDFLGFQITNEGRGLTDTFKEKLENITAPTTLKQL  
 QSILGLLNFARNFIPDFTELIAPLYALIPKSTK--NYVPW  
 >BFV  
 QYHINPRAKADIQIVIDDLLRQGVLRQQNSEMNTPVYVVPKADGRWRMVLVDYR-----  
 EVNKVTPLVATQNCHSASILNTLYRGP-YKSTDLANGFWAHPVIVPEYWITAFTH-----  
 GGKTYCWTVLPQGFNLSPALFTADVVDILKD-----IPN--  
 VQVYVDDVYVSSATEQEHLDILETIFNRLSTAGYIVSLKSKLAKETVEFLGFSISQNGRGLTDSYKQKLMDLQPPTTLR  
 QLQSILGLINFARNFLPNFAELVAPLYQLIPKAKG--QCIPW  
 >EFV  
 QYRINPKAKADIQIVIDDLLKQGVLRQQTSPMNTPVYVVPKPDGRWRMVLVDYR-----  
 AVNKVTPAIATQNCHSASLLNTLYRGQ-YKTTLDLANGFWAHPVIVPEYWITAFTH-----  
 NGKSYVWTVLPQGFNLSPALFTADVVDLLKD-----IPN--  
 VEVYVDDVYVSNDEEHLKTMDDLQKLTAGYIVSLKSKLQHTVDFLGFQITQTRGLTDSYKSKLLDITPPNTL  
 KQLQSILGLLNFARNFIPNYSELITPLYQLIPLAKG--IYIPW  
 >SFV  
 QYHINPKAKPSIQIVINDLLKQGVLRQSTSPMNTPVYVVPKPDGKWRMVLVDYR-----  
 AVNKTIPLIAAQNHSLGILTNLIRHK-YKSTIDLNGFWAHPITEDSQWITAFTH-----  
 EGKQHVWTRLPGGFNLSPALFTADVVDILKE-----VPG--  
 VSVYVDDIYISSPTMEEHFQVLDISFRKLEETGYIVSLKKSALARYEVNFLGFVISETRGLTSEFRERLQEIPTTLKQL  
 QSILGFLNFARNFVNFSELVQPLYQLISTASG--NFIQW  
 >CoEFV  
 QYPINTKAIPSIQVINELLEQGVLVKQTSPTNMAVLPVVPKPDGTWRLVLDYR-----  
 ALNKHSEPVRAQNQHSSGILANIERKA-YKSSVDLANGFWSHPVIREEDWPKMAFTW-----  
 CGFQYLWTRLPGGFNLSPALFSADVISLVGQ-----LPG--  
 VYCYVDDIYLTHDTEEEHLKILDQVLEILIKAGYVINIKKSKLCKRVDFLGFSLSDGRGLSDQYREKLAAIKPPQTLRQ  
 LQSVMGLLNFARLRFVKGFSSELAKPLYDL-----  
 >Amn-san  
 -----MKEYISENLQRGFIRPSTSPAGAGFFVEKKDGGLRPCIDYR-----GLNKITVKNRYPLPLISELFDQLKGA-  
 IFSKLDLRGAYNLIRIREGDEWKAFNT-----RDGHYEYLVMPFGLCNAPAVFQEFVNDIFRD-----  
 LLGKSVVVYLDLIFSDLETHRSQVKEALSRLRENFLFAKLEKCTFEVVKISFLGYIISRGFEMDPAKVSIAIQKWPLPQ  
 STKAIQRFIGFANYRQFIKDFS-----  
 >Sushi-ichi  
 -----LASGIIRPSSPLAAGFFVAKEDGGLRPCIDFR-----KLNNITVKNKYPLPLMSSTFEPLTHAR-  
 VFTKLDLRNAYHLVQIRKGDEWKAFNT-----HLGHFEYLVMPFGLSNAPAVFQELVNDVLRD-----  
 MINVFVVVYLDLIFSRMEEHHQHVRLVLRLENLRFIKAEEKCIFHSASVGYLGYIVEEGRVRADPAKIQAVVEWPR  
 PTDRTQLRRFLGFAGFIRRFKGF-----  
 >CRM

-----LDKGYVRESLSPCAVPVILVPKKDGTWRMCVDCR-----AINNITIRYRHPIPRLLDDMLDELSGAI-  
VFSKVDLRSGYHQIRMKLGDEWKTAFKT-----KFGLYEWLVMPFGLTNAPSTFMRLMNEVLRA-----  
FIGKFVVVYFDDILIYSKSMDEHVDHMRAVFNALRDARLFGNLEKCTFCTDRVSFLGYVVTPOGIEVDQAKVEAIHG  
WMPKTTITQVRSFLGLAGFYRRFVKDFS-----  
>Reina  
-----LEQGVQIHSSSPFASPVLLVKKKDGWRLCVDYR-----RLNAHTVKNRYPMPVFDEIVDELCGTK-  
IFTKLDHRSGYHQIRIKEGDEFKTAFT-----HNGHYEYRVMFPFGLTGAPATFQDFMKNILTP-----  
FLRKC VVVFLDDVLIYSRDMEEHVLQVKQVFQKLDHQLKLSKCRFAQTTFLEFLGHIISAEGIATDPEKVQVIRDWPI  
PNNVKEVRSFLGMAGYRRFVAHYA-----  
>Del  
-----LNKGFIRGSTSPWGAHVLFDPKKDDSKRMCIDYK-----LNSVTVKNKYPLPRIDDLFDQLNGA--  
YFSKIDLRFRYHQLRIR-ADIPKTAFT-----RYGHYEFVMPFGLTNVPTAFMNLNMRVFRE-----  
YLDKFIVVFVDYVLIYSRTQKDHEHHLRISLQLLRNNQLYAKLSKCEFWMEKVKFLGHVVSREGIVVDPVKVAVMN  
WELPKNIFEIRSFLGLAGYRRFIKGA-----  
>Galadriel  
-----LDAGLIQPSKAPYGAPVLFQKKQDGTMRMCVDR-----ALNKATIKNKYSVPLVQDLMDRLSKAC-  
WFTKLDLRAGYQVRIAEGDEPKTTCVT-----RYGSYEFVMPFGLTNAPATFCNLMNNVLF-----  
YLDFFVVVYLDLDDIYSRTLEEHNHLSLVLSQLRKYTYLVKMEKCEFAAQEIKFLGHLVSKNQVRMDPKKVQAIVDW  
QAPRHVKDLRSFLGLANYYRKFIAIGYS-----  
>Maggy  
-----LKKGFIRPSSSSVSPVLFVKKQGGGLRFCVDYR-----ALNNITVKDRYPLPLVRETLNLAGMK-  
FFSKIDIVSAFNIRIKKGEYLTAFRT-----RFGLYESLVMPFGLTGAPATFQRYINDSLRE-----  
YLDVFCAYLDDIYSRTRTEHEEHLKLVLEALRKAGLYANAACEFFVTETKFLGLLVGVGVKMDPEKITAVLDW  
QTPKCLTDVQAFVGFNGFYRRFIRDA-----  
>Skippy  
-----IRKGYIRPSKSSAGFPVMFVPKPNNKLRVVDYR-----QLNEITEKDRTSLPLITELKDRFLGKK-  
WFTALDLKSAYNLIRIKEADEWKTAFRT-----KYGLFEYLVMPFGLTNAPAVFQRMITNVLRE-----  
YLDIFVVCYLDLIDIFSDTEEEHTEHVHKVLKALQDANMLVEPTKSHFHQSQVTYLGHEISHNEIRMDRRKIAAVA  
EWKVPTS VKETQSFLGFANYRRFIKDA-----  
>Pyggy  
-----LDKGFIRVSSLLAFLVLFAKKLEGLRLCIDYW-----ALNAITRKNRYLLPLIRETLNISKAK-  
WFTKLDVIAAFYKIRVAEGDEWKTAFRT-----RFSLYEWLVTPFGMANSSTFQRYINWTLRE-----  
YLDEFCSAYLDDVLIYTDLSLEQHVDHVRKVLRLKQESGLNVDIKKCEFGVKSTKYLGIIAEGIRMDPEKVKAIME  
WE-PLRLRAYVHFWDSTSTGDLSRDFS-----  
>Gypsy  
-----LKDGIIIRSPSPYNSPTWVVDKKNPNKRLVIDFR-----KLNEKTIPTDRYPMPSIPMILANLGKAK-  
FFTLDLKSQYHQIYLAEHDRKTSFSV-----NGGKYEFCLPFGLRNASSIFQALDDVLE-----  
QIGKICYVYVDDVIIFSENEVDHVRHIDTVLKLCLIDANMRVSEQKTRFFKESVEYLGFIKSDGKSDPEKVKA  
IQEYPEPDCVYK VRSFLGLASYRFFIKDA-----  
>Tom  
-----LEQGLIRESNSPYNSPTWVVPKKAAYRVVIDYR-----KLNEITIPDRFPINMDEILGKLGKQC-  
YFTTIDLARGFHQIEMDSESIQKTAFT-----KRGHYEVVRMPFGLRNAPATFQRCMNNILRP-----  
LINKHCLVYLDLMIIFSTSLDEHLNSLQLVFEKLSSENLKQLDKCEFLKKEATFLGHIVTPDGIKPNPLKVEIA  
SYPIPTKVKEIRAFVGMTGYRKFIPSYA-----  
>Zam  
-----LDQQIIRSSHSPWSAPVWVVPKKNRWRVIDYR-----KLNDKTISDRYPIPNINDILDSIGKAK-  
YFSTLDLTSGFHQIEMNPKDIAKTAFTV-----EGGHYEFTRMPFGLKNAPATFQRMVDSVLD-----  
LNGTICLFYLDLIIIFPSLQKHLDDIKMVFEKLRANFKLQPSKSEFLRKEIEFLGHIVTQDGVKPNPNKISA  
IKKFPCCPTNRAIKSFLGGLGYRKFIRDA-----  
>Cer3  
-----IQSGRIVESNTPWTSPIVLIKKNGLSLRVCLDFR-----KLNEVTPDNYPLPRIDSIIEQIGGSK-  
YFTSLDMANGYLQLRLDAESSDKCGFIT-----ENKVYAYTHLPFGLRSAASYFQRDLKQVLG-----  
LEKEVTYVYIDVLIYSKTFEEHLNSLRKVLERFRKFNKLVSPNKCEFFKQSITFLGHEINADNYKPNRIN  
VDAIVNLPTRNVGDVRRFIGMSGFFRKFPLPNFS-----  
>Mdg3  
-----LENGFIRPSDSEYASPIVLVKKKTGDLRMCVDFR-----KLNKMTMKDNYPLPLIDDLDRMNEKT-  
VFTKLDLKNNGFFHVHVKKESIKYTSFVT-----PLGQYEWLRMPFGLKNAPSVFQRFVKNKIFAD-----  
MIENKVVVYMDLILLATENINEHLETLKEIFKRLVENKLELRIDKCEFMQSSIKYLGFIINKDGIMPNDK  
GIEAIKNFPIPNVHTVQSFLGLCSYFRRFIKDFS-----  
>Mdg1  
-----IKDGIVEQSISEYNSPLLLVPKKEKRWRVVDYR-----QINKKLLADKFPLPRIEDILDQLGRAK-  
YFSCDLMSGFHQIELDERSRNTSFST-----STGAYRYTRLPFGLKIAPNSFQRMMTLAFSG-----

LTPSQAFLYMDDL VVIGCSEKHMLKNLTDVFKLCRQHNLKLHPEKCTFFMKEVTYLGHKCTDKGILPDDSKYEVIKNY  
 PKPVNADEARRFVAFCNYYRRFIKNFA-----  
 >TF1  
 -----LKSGLIIESKAINACPVMFVPKKEGTLRMVVDYK-----PLNKYVKPNYPLPLIEQLLAKIQGST-  
 IFTKLDLKSAYHLIRVRKGDEHKLAFC-----PRGVFEYLVMPYGISTAPAHFYFINTILGE-----  
 AKESHVVCYMDLILHSKSESEHVKHVKDVLQKLNANLIINQAKCEFHSQVVKFIGYHISEKGFTPCQENIDKVLQWK  
 QPKNRKELRQFLGSVNYLRKFIPKTS-----  
 >Gmr1  
 -----LKLGVIEESRSASPIVLPKPDGTHRFCNDFR-----RLNEVSDFDSYPMPRVDELIERLGP  
 YLSTLDLTKGYWQVPLAPSSREKTAFA-----PGGLFYQTVLPFGVHGAPATFQRMMDQVLRP-----  
 HSSYAAAYIDDIIHSASWDEHVKHVRAVLNGLRAAGLTANPAKCRGREETAYLGYRVGRGNVRPQEDKVAIREWP  
 QPQTKKQVRSFLGLVGYRQFIPGYA-----  
 >Woot  
 -----LDLGVIKREASPYASPMTVGKKKDGTVRCLDAR-----MINSKMIADCESPPAADELLRRFHEIR-  
 YMSTIDLRSSYWQIPLSPESRQYTAFLY-----NGRSYTYQVLPFGLKTAVGSFSRAMDVVLGT-----  
 EVREFVVNYIDDLLVASETLNEHLEHLRQVFEKLLQARMINTINLEKSNFIQKEVKFLGHILTINGIKADPEKISAIRNFPVPQ  
 KTKHVRAFLGLCNFYRKFCAHYA-----  
 >Cer4  
 -----LDLEVELEPITSDWAAPIVVIRKKGDKVRVCADF-----CLNNSLIEEIHPLPTSDDLFGTLQGC--  
 IFSKIDLKDAYLQIALDSESQKLA VINT-----HKGLFKYRRMTFGLKPAPAKFQKIIDKMIAG-----LPG--  
 VAAAYLDDVIVSANSLEEHEKVLHELLKRIKDYGFRISPEKCNFAQSEITFLGFIDKRGRRPDPKKT SVIRSMKAPTDQKQ  
 LMSFLGAICFYGRFVPMKMS-----  
 >Mag  
 -----LAAGVIKPVDSWATPLVVVRKADGGLRICADYK-----VLNKVLAIDRFVPMKEDLFSNLSGNK-  
 FFTKLDLSQAYNQIVLSERSSEYTVINT-----HRGLFKYSRLVYGLASSPGIFQKLMVNMFKN-----VPN--  
 VVVFYDDILIRNQDLDSLKSIKEVLDILERYGLKIKRSKCEFMVTEVRYLGFIDQNGVRVDPEKVKSIATMHPHPNNVTE  
 LKSFIGMVNFYSKFIQDLA-----  
 >SPM  
 -----LDRLGKAGVIKKVKSRAAPIVTPKSDGVSRLCGDYK-----QVNKVLEEDVYPLPTCEDLFANLAGGK-  
 VFSKIDLSNAYLQELTDKSKELLTIHT-----HKGLYQYERLPGVSTAPAVFQSVMDRILGG-----MKG--  
 VCCYLDDILISSENEEDHIKTLNEVLGRLQEYGVKAKKEKCSFMVSRVYILGHEIDGKGVHPTKEKVEGICDAKRPENK  
 DELRTFIGIVVYAKFVFNLA-----  
 >SURL  
 -----ERLDVITPVDTDWVSSLVVMKKNQRLVCLDPR-----DLNRAIKREHYQLPSRAEITAHFAGAK-  
 YFSKLDASSGFWQIQLDDESSKLCFTIT-----PYGRYKFLRPLFGICSAPEVYHKIVHQMFH-----IPG--  
 VNTMMDDVIVWGTTQEQEHDNRLREVLSIARRMNLKLNKDKCEFSVKKLTFIGDLISDQGVQDPKVSAILNMRPKC  
 RKDVQRFLGMINYQKGFIPDLA-----  
 >Kabuki  
 -----QELGICRPSKIAWASPLHIVPKKNGDLRPGCDYR-----QLNAITKPDYPIPRRHDFTYILDDKK-  
 IFSKLDINRAFHCDIVAPEDIEKTAIIT-----PFGLFEFPKMTFGLRNAPQTFQRFMNNTVLH-----GLE-  
 FLFSYLDDVIIASESPTQHNEHLRIVFERFNSYGITINLDCCFGQPKVEFLGHEVSVNGITPLKNKVEAIINFPKPTVSDL  
 RRFLGMVNFYRPHLPNSA-----  
 >Tor4a  
 -----LDQFLENKLIIEPCSSPWNSPSSLVRKKDGRFRLVIDYR-----RLNDATLQMHHPNLEDSISYLEKSR-  
 VYSMCDMIKGFHQIDLDESKQKTAFSN-----EFGQFYTRMPMGCKNAPSFFMRIMDKALLG-----  
 VKKTEIIAYMDDLCHSQTEVEHIKILEKLFQILAVNNLRINSKKAFFTDSVNFCEGYDISNGKICPSQDKIEAIQKLIKIPRT  
 KDAAQSLFGALNYHRRFIRNFA-----  
 >Tor1  
 -----EDAGIIEKASSFNAPLQLVRKSSGGYRICVDMR-----SLNNRLAESKWPLPSLAETLESAGTA-  
 FFSCVDIRQAFFHMALTDDESKHLTAFSA-----LNCQYQFRRLPMGLKISPSVYQMAMKETLGN-----  
 DLGNKAVVYLDDVLVTGRTEDEHLEALDVLDRLRKAGFLLNPKCILGVKKTTFLGHEVTTEGYYPKTDNLAAIREF  
 PKPTNKKALRRFIGMTAFYSTLVPKLQ-----  
 >Athila4-1  
 -----IYPISDSTWVSPVHCVPKKITGHRMCIDYR-----KLNAASRKDHFPLPFIDQMLERLANHP-  
 YYCFLDGYSGFFQIPIHPNDQEKTTFTC-----PYGTFA YKRMPFGLCNAPATFQRCMTSIFSD-----  
 LIEEMVEVFMDDFSVYGPSFSSCLNLGRVLRCEETNLVLNWEKCHFMVKEGIVLDHKISEKGIEVDKGGKVEVMMQL  
 QPPKTVKDIRSFLGHAGFYRRFIKDA-----  
 >Diaspora  
 -----IYPISDSQWVSPVQVVPKQNNWRVCIHYR-----RLNQVTKKDHFPPLPFIDQILECLAGKS-  
 HYCFLDGFSGYMQITIALEDQEKTTFTC-----LFGTFAYRRMSFGLCNAPGTFQRCMISIFSD-----  
 FLENCIEEFMDDFTVYGGSSFDGLDSLEKVLNRRRIETNLVLNFEKCHFMVEQGVIVLGHII SNKGIEVDPAKISVISQLPYPS  
 CV-EVRSFLGHAGFYRCFIRDFS-----

>RetroSor1

-----LDAKVIREVIPEWLANVVLVPPKNGKMRMCIDFT-----DLNKACVKDSFPLPRIDTSVDKAAGCQ-  
RFSLLDCFSGYHQIWLKKEDEGKASFTT-----PFGTYCYTRMPEGLKNAGATFSRMMGKVLGS-----  
QLQRNIIAYVDDVVVMSKRKEDHIKDLQETFVNLRSAAGLKNPEKCVFVGVSKGKMLGYIISSEGIRANPDKTKAIMSMA  
EPSNKKEVQRLTGRIAAALNRFISRSA-----

>Tat4-1

-----LGAGSIVEVKPEWLANPVVVKKNGKLRVCIDFT-----DLNKACPKDSFPLPHIDRMVEATTGNE-  
LLSFMDAFSGYNQIPMHKDDQEKTSTFIT-----DRGTYCYKVMFPGLKNAGARYQRLVNQMFAP-----  
QLGKTMEVYIDDMLVKSKKSADHIEHLTACFETLNKYNMKNLPAKCSFGVTSGEFLGYIVTKRGIEANPKQIQAILDLK  
SPRNKKEVQRLTGRIAAALNFIARST-----

>Cigr-1

-----LEEEIIEPSNSPWRAQVLVAREGSKPRMVIDYS-----QVNVFTELDAYPLPSIESIVNKVTQDK-  
VYSSLDLRSAYHQIPLKSDRPPTAFEA-----EGQLYQYKRLPFGVTNGVSAFQRIINRFIQD-----  
NHLNKVYAYLDDITVTGETLEEHRNLKLLVAAKRHLNTINEEKSKLRMTSIDFLGYRISYGDARPDPERLRPLLNLPP  
PDTPRELKRIQGMFAYYAKWISRFS-----

>CaMV

--KYSMPDREEFDKQIKELLDLKVIPSKSPHMAPAFLVNNEAGKKRMVVNYK-----  
AMNKATVGDAYNLPNKDELLTLIRGKK-IFSSFDCKSGFWQVLLDQESRPLTAFTC-----  
PQGHYEWNVVFPGLKQAPSIFQRHMDEAFRV-----  
FRKFCCVYVDDILVFSNNEEDHLLHVAMILQKCNQHGIILSKKKAQLFKKKINFLGLEIDEGTHKPQGHILEHINKFPDTE  
DKKQLQRFLGILTYASDYIPKLAQIRKPLQAKLKENV----PWRW

>SbCMV

--PYTIRDVQEFKEECEDLLKKGLIRESQSPHSAPAFYVENHNGKRRMVINYK-----  
KMNEATIGDSYKLPKDFILEKIKGSL-WFSSLDAKSGYYQLRLHENTKPLTAFCSP-----  
PQKHYEWNVLSFGLKQAPSIYQRFMDQSLKG-----  
LEHICLAYIDDILIFTKSKQHVNDVRIVLQRIKEGHIISKKKSKLIQQEIEYLGLKIQGNEIDLSPHTQEKILQFPDEEDRK  
QIQRFLGCINYIANFFKNLALERKHLQKKISVKN---PWKW

>ComYMV

--HVTPGDEEAMTRQINLLLQMKVIRPSESKHRSTAFIVRSRGTKERMVFNYK-----  
LLNENTESDQYSLPGINTIISKVGRSK-IYSKFDLKSFGWQVAMEEESVPWTAFLA-----  
GNKLYEWLVMPFGLKNAPAFQKMDNVFKG-----  
TEKFIAVYIDDILVFSETAEQHSQHLYTMLQLCKENGLLSPTKMKIGTPEIDFLGASLGCTKIKLQPHIISKICDFSDKATP  
EGMRSWLGILSYARNYIQDIGKLVQPLRQKMAPTG---DKRM

>RTBV

--PYTPADKEVFEKQIKELLDNKLKADCRHRATAAFIVRNHSQKPRIVYNYK-----  
RLNDNMHTDPFNIPHKISMINLIQKAN-IFSKFDLKAAGFHHMKLKDDFKDWTFTFC-----  
SEGLYTWNVCPFGIANAPCAFQRFMQESFGD-----  
KFALLYIDDILIASNNEKEHIEHLKIFFNRVKEVGCVLSKKKSKMFLKEVEYLGVEIKEGKISLQPHIVDKIKKFDKKNL  
KGLQAYLGLLNYARGYIKDLKLVGPLYKKTGKNG---QRIF

>CSMVV

--LYQETDLPEFKMHIEEMIKEGFIEEDKKYSSPAFIVNKHSGKTRMVIDYK-----  
DLNKKAKVVKYPIPNKDTLIHRSIQAR-YYSKFDCKSGFYHIKLEEDSKKYTAFTV-----  
PQGYYQWKVLPFGYHNSPSIFQQFMDRIFRP-----  
YYDFIIVYIDDILVFSKTIEEHKIHIKFRDITLANGLIISKKKTELCKEKIDFLGVQIEQGGIELQPHIINKILEKHTKKNKTE  
LQSILGLLNQIRHFIPHLAQILLPIQKCLKIKD---EEIW

>PVCV

--GMNPEHLQLAIKECDELQQFDLIEPSDSQWACEAFYVNRSGKLRVLVINYQ-----  
PLNHFLQDDKFPINKLTLSHLSKAK-LFSKFDLKSFGWQLGIHPNERPKTGFCI-----  
PDRHFQWKVMPFGLKTAPSLFQKAMIKIFQP-----  
ILFSALVYIDDILLFSETLEDHIKLLNQFISLVKFGVMLSAKKMILAQNKIQFLGMDFADGTFSAGHISLELQKFPDLS  
VKQIQQLGIVNYIRDFIPEVTEHISPLSDMLKKK---PAWG

>HERV-L

QYCI-PGGIAEISATIKDLKDAGVVIPTTSPFNSPIWPVQKTDGWSRMTVDYH-----  
KLNQVVTPIAVPVPDVVSLEEQISPGT-WYAAIDLANAFFSIPVHKAHQKQFAFSW-----  
QGQYQYTFVLPQGYINSPALCHNLQIRDLDD-----  
PQDITLVHYIDDIMLIGSSEQEVANTDLLVRHLHARGWEINLTKIQGPSTSVKFLGVLVQWCACDIVPSKVDKLLHLAP  
PTTKKEAQLVGLFGFWRQHIPHLGVLLWPIYQVTQKAA---SFEW

>MuERV-L

QYCI-PGEIAEITATIKDLKDAGVVVPTTSPFNSPIWPVQKTDGWSRMTVDYR-----  
KLNQVVTPIAAAVPDPVVSLEEQISPGT-WYAAIDLANAFFSVPVHKDHQKQIAFSW-----  
QGQYQYTFVLPQVYINSPALCHNLVRRDLDR-----

PQSITLVHYIDDIMLVGPSEQEVATTLDSLVTMIRGWEINPTKIQGPSTSVKFLGVQWCG-  
 ACRDIPSKVDKLLHLAPPTTKEAQRLVGLFGFWRQHHPHLGVLLRPIYQVTRKAA----SFVW  
 >Tor2  
 -----VKAQIDNMAKDGIIEPCDKGFHSPLVIVRKKTGGLRICSDFKS-----SLNQCLDETTWPLPQMDHLFANIHGHR-  
 IFTSLDVSKAYWNLLIDPRDRHKTNFTF-----DNKCWMYVRLPFGFKFSGDAFCRSISSMLDR-----  
 VSKSNFCNYVDDVLAAYSSDCETHVKVLQQIFSACRHFGARLGAKKCTFGQASTAFMGRIISAEGISIPPENMETILALKPP  
 TTRKQVQSLIGNFCWLKSWVSANL-----  
 >SRV-1  
 QWPLTSEKLAQAQQLVQEQLQLEAGHITESNSPWNTPIFVIKKSXGKWRLQDLR-----AVNATMVLMGALQPGLPSP-  
 VAIPQGY-LKIIIDLKDCFFSIPLHPSDQKRFASFSLPSTNFKEPMQRFQWKVLPQRMANSPTLCQKYVATAIHKVRH-----  
 -----AWKQMYIIHYMDDILIAAGKDGQVQLQCFDQLKQELTIAGLHIAPEKIQL-QDPYTYLGFELNGPKITNQK----  
 AVIRKDKLQTLNDFQKLLGDINWLRPYLKLTTADLKPLFDLTKGDSNPNS----  
 >MMTV  
 QWPLKQEKLQALQQLVTEQLQGHLEESNSPWNTPVFVIKKSXGKWRLQDLR-----AVNATMHDMGALQPGLPSP-  
 VAVPKGW-EIIIDLQDCFFNIKLPEDCKRFASFVSPNFKRPYQRFQWKVLPQGMKNSPTLCQKFVDKAILTVRD-----  
 -----KYQDSYIVHYMDDILAHPSRSIVDEILTSMIQALNKHGLVVSTEKIQK-YDNLKYLGTHIQGDSVSYQK----  
 LQIRTDKLRTLNDFQKLLGNINWIRPFLKLTGELKPLFEILNGDSNPIS----  
 >JSRV  
 -----MMHMGALQPGLPTP-SAIPDKS-  
 YIIVIDLKDCFYTIPLAQDCKRFASFSLPSVNFKEPMQRYQWRVLPQGMTNSPTLCQKFVATAIAPVRQ-----  
 RFPQLYLHYMDDILLAHTDEHLLYQAFSILKQHLNGLVIADEKIQT-HFPYNYLGFSLYPRVYNTQL----  
 VKLQTDHLKTLNDFQKLLGDINWIRPYLKLPTYTLQPLFDILKGDSDPAS----  
 >LDV  
 QWPLTAQKLDVQNIQDLLKDGRIPSRSQWNSPIFVIKKSXGKWRLQDLR-----AVNALIKDWGALQPGLPSP-  
 GAIPSEW-PVIAMDIDCFFSIPLAERDSERFAFTIPSPNLRPAKRYQWTVLPQGMKNSPYICQVVAEVIPIRE-----  
 --RFRDAVHYMDDILIAAAEERQTEVIFEAVKTTTCEKGLKINEAKTQR-APEVSYLWWRVWVETGIAP-----  
 LTVQLPETTNLVQLQRLGIIQWLKPILSLRPEQLQVFYDLLKGGKTRPEE----  
 >RSV  
 QWPLPEGKLVALTQVLEKELQGHIEPSLSCWNTPVFVIRKASGSYRLLHDLR-----AVNAKLVPFGAVQOGAPVL-  
 SALPRGW-PLMVLDLKDCFFSIPLAEQDREAFATLPSVNNQAPARRFQWKVLPQGMTCSPTICQLVVGQVLEPLRL-----  
 -----KHPSLCMLHYMDDLLAASSHDGLEAAGEEVISTLERAGFTISPDKVQR-EPGVQYLYGLGSTYVAPVG----  
 LVAEPRIATLWDVQKLVGSLQWLRPALGIPRLMGPFYEQLRGSDPNEA----  
 >HIV-1  
 QWPLTEEKIKALVEICTEMEKEGKISKGENPYNTPVFAIKKSKTKWRKLVDFR-----ELNKRTQDFWEVQLGIPHP-  
 AGLKSKK-SVTVLDVGDAYFSVPLDEDFRKYTAFTIPSPINNETPGIRYQYNVLPQGWKGSFAIFQSSMTKILEPFRK-----  
 -----QNPDIYIYQYMDLDYVGSDEIGQHRTKIEELRQHLLRWGLTTPDKKHQK-EPPFLWGMGYELHPDKWTVQP----  
 IVLPEKDSWTVNDIQKLVGKLNWASQIYPGIK--VRQLCKLLRGTKALTE----  
 >FIV  
 QWPLTNEKIEALTEIVERLEREGKVKRDNNPWNTPVFAIKKSKTKWRMLIDFR-----ELNKLTEKGAEVQLGLPHP-  
 AGLQIKK-QVTVLDIGDAYFTIPLDPDYAPYTAFTLPRKNNAGPGRRFVWCSLPQGWILSPLIYQSTLDNIIQPFIR-----  
 --QNPQLDIYQYMDLDIYIGSNKKEHKEKVEELRKLWWGFETPEDKLQE-EPPYTWGMGYELHPLTWIQQ----  
 KQLDIPEQPTLNELQKLAGKINWASQAIPDLS--IKALTNMMRGNQNLNSTRQW  
 >EIAV  
 QWPLTKEKLEGAKEIVQRLLESEGKISESNNPNYNSPIFVIKKSXGKWRLQDLR-----ELNKTVQVGTETSRGLPHP-  
 GGLIKCK-HMTVLDIGDAYFTIPLDPEFRPYTAFTIPSPINHQPDKRYVWVKCLPQGFVLSPIYIYQTLQEIQLQPFRE-----  
 --RYPEVQLYQYMDLDFMGSNKSKQHKELIILRAILLEKGFETPDDKLQE-VPPYSWLGQYQLCPENWVKVQK----  
 MQLDMVKNPTLNDVQKLMGNITWMSGIPGLT--VKHIAATTKGCELELNQKVIW  
 >HTLV-2  
 PISFKPERLQALNDLVSKALEAGHIEPYSGPGNNPVFPVKKPNGKWRFIHDLR-----  
 ATNAITTLTSPSPGPPDLTSLPTALP-  
 HLQITIDTDAFFQIPLPKYQYQPYFAFTIPQPCNYGPGTRYAWTVLPQGFKNSTLFEQQLAAVLNPMRK-----  
 MFPTSTIVQYMDLILLASPTNEELQQLSQLTLQALTTGHLPISEKTTQTPGQIRFLGQVISPNHITYES---  
 TPTIPIKSQWTLTELQVILGEIQWVSKGTPILRKHLSLQSLYSALHGYRDPACIT-  
 >BLV  
 QFPLNLERLQALQDLVHRSLEAGYISPWDGPGNNPVFPVRKPNGTWRFVHDLR-----  
 ATNALTKPIALSPGPPDLTAIPTHLP-  
 HIICLDLKDFAFFQIPVEDRFRSYFAFTLPTPGGLQPHRRFAWRVLPQGFINSFALFERALQEPLRQVSA-----  
 AFSQSLLSYMDLILLASPTNEEQRSQCYQALAAARLRLDGFQVASEKTRQTPSPVPFLGQMVHNQIVTYQS---  
 LPTLQISSPISLHQLQAVLGDQLQWVSRGTPTRRPLQLLYSSLKGIDDPRAIIQ-  
 >PreDIRS  
 -----EHAAFVTDEDEKLCSTGAAELSDVKVISALSVSVNADAKCRLVMDLT-----  
 TVNPYITANKIKLENVIAKSLIPKSG-FMLTFDMKSGYHQARMADSELIYLAFRW-----

EGKTFWMKALPFGLSAPEYFTKLFHRHPLATLR-----  
 GDGVNCLLYLDDLLVWSETYEGACEASAKVRALFGKLGVLNNEKSSVTQREVKWLGVVFNLTTLKISKRNRIARLLNR  
 KRPSAKDRLK-FTGALNSMHDVLPMAAITKSLFCFIASVT-----  
 >CbrDIRS  
 -RPSVKRHEEFLIAEIKRLEEEGVVVR-EEPCVSPLHVV-EQGKKRMILDLS-----  
 ELNESLVPPRFKLENLKTAWPFLENK-FAATDFKSGYHHIKIHRDSRDLLGFSLSNP----  
 PAAYFLFKGLPFGLSIAPWLFKIFKVLVQKWR-----  
 AEGIKIFLYLDDGLVVGETEREVARAVRKVREDLHNAGVCVAEEKSFWVDAKFTWLGVECDLVEVRGTEKRMDELRR  
 SLAPTVLDRMK-FLGCQASFELVTGDIGVAARWMMQVVGGENQKKKS----  
 >Bel  
 -----RGHMEKSDTCFYLPHHAVIKLDTKCRVVFDSGKDSGVSLENDRLHIGPPIQRDLFGVCLRFQHQ-  
 YVLCADVEKMFGRGKVFKPHNTFQRIWRTTENE-PLLHFRLLTVTYGLAPSPFLAVRVLKLQADDHGEY-----  
 PAAAHALLHDAYVDDIPTGANTFEELMILKDELIALLDKGGFKLRKWSNSWSDSPVKVLGIQWNPGDVLYLNLKGCDA  
 TISTKRELLSQLSRIYDPLGLVAPVTVLL-----  
 >Kobel  
 -----NGYAEKKGKEWYIPHHGVYHPRNKIRVVFDCAAKCDGTSLENDVLLPGPNLMNDLKGVLRFREFP-  
 VAFASDIECMFYQVKVPESQRDLLRFLWLPKDLQPKVYRMAVHLFGAVSAPSCANYSLRRTGIDNIAR-----  
 EETVNTLHNNFYMDDGLKSVENVEQAIQLVKELKALCKEGGFNLTKWSSNERLPTERTLGVWNAEDEFQFKCQIKKT  
 -EVTRRSMLSEVSSIYDPLGFIAPLLIPA-----  
 >Tamy  
 -----SGYAEETGRTFYLPHFVAVHPMKIRIVFDAASRYEGKSLNDALLPGPDLLQSLFGVLLRFRQGP-  
 VAVVADIKEMFLQIKIREQDRDSLRFWRGEDRASKPREYRMTSVIFGAASSPATAIFVKNRNAEEHQSH-----  
 PEAVKAIVRNHYMDDYLQSFATIEEAIDTAATVDSIHKEAGFELRQWASNEQSNEEKTLGLRWLIKDALAFNGGLRNAP  
 KVTKREVTSAVMSTFDPLGLIAPLL-----  
 >Purbel  
 -----MGFAKKGVPVHYISHHAVIRPDTPLRIVFNSSAIYKGHCLNEYWKKGPDLLNLFVLLRFREHP-  
 VAICADISKMYHRILIPERDQHVHRFLWRDMNQEKEPDVYMMKVVTFGDKPAAAMAQIGVRLTAEEGEKY-----  
 PEAAAILKRNIYMDICDSVETEDTAKKRIAIVEDLEAGGFKVKGWQSNKPIAEEKVLGVVWERHDTFSYKVKLQET  
 DKKTKRKILGKVARIYDPIGFAAPIIIKA-----  
 >Zebel  
 -----AGYVAKKNESWYIPHH-VVHHNNKDRIVFNCSFQHQGQSLNSQLLPGPTLGPSSLGVLLRFRQHA-  
 VAVSGDIKGMFHQVRLPKDKQVLRFLWRDLCRDREPDIYEWQVLPFGTTCSPCCAIFALQHHAQGKDKM-----  
 PKLVNIVENSFYVDNCLYSTPTAKEAKDVVDGLRQLLAEGGFDLRQWACNVPDLQEPTLGLRWNCLESLGYNLRSAP  
 LEPTMRNMYKTLASQYDPLGFIIPFTT-----  
 >Cer10-1  
 -----AGIVERADVKYYTPHRAVIKETTCLRIVLDASSPPPEPSLNDCLYAGDNLVTPLYGILLRGRRIYP-  
 YVVVADIEKAFHQVRLPTEFRNASLFLWL-KDITKPPTTYRFRTRIPFGVASSPWLLAASILHFLDRN-----  
 PPLNQRVRENLYVDNCLIGTFDKSEITEIINKSKDIFMKMKMNLREYVTNSEHRVIKLLGCEWSDSHDILSVALAVLDIDH  
 PTKRQVASKMAETFDPLGLITPLIVSF-----  
 >Ty1B  
 -----YHKEVNQLLKMKTWDTDPKRVINSMFIFRKRDKARFVARGDIQHP--DTSNTVHHY-----  
 ALMTSLSLALDNNYHITQLDISSAYLYADIKEELYRPPPHLGM-----  
 NDKLIRLKKSLYGLKQSGANWYETIKSYLKQCGEVVRGWSVCF----  
 ENSQVTICLVDDMVLFSKLNLSNKRIIDKLMQYDTKIINLGESEIQ---YDILGLEIKYQRGKYMKLG MEN-----  
 -----  
 >CoDi5.6  
 -----FGKEIGSLAQKGTDTIDRKNIPKDRVIT----YARIVVDYR-----  
 PQNRTAGGNTADLTTAKLMNSVISTDNARYACYDVKNFYLGTPLDREYEMRIPLHLIPQHI--  
 TNKYVEIRKGIYGLPQAGMLANKLLKERLAPHGLEVRDTPGLFI--HKTRPIMFTLVVDDFGVKYVGKEH----  
 ADHLVSVLK-RYYTLESDWTGS----LYCGVSLKWN Y-----KERWVDISMPGYIKNALQRYN-----  
 >Zecol  
 -----KQAEIFNWKNNVFE-EDQKCVSTRWVCLKETPKARLVARGFEEL-NIHELQKDSPT-  
 CASDSLRLLLAVICQNKWQVHSMDIKSAFLQGQLSREIYVRPPPEVGK-----  
 ENVLWKLKNCVYGLADASLYWYIKVKIMLSTGSKLSKVDPAVFYLDQCKVTGVLACHVDDFLWAGSQNFS----  
 TNVIPILK-SALNVGREEHEH---FCYVGMDFVT-----INGVVHVHQHRYIEN-----  
 >Ty4  
 -----YHKELQNLKDMKVFDVDN--IVPTNTIFKKRNYKARIVCRGDTQSP----DTYSVTSLENNHIKIFLMMQTTEI-  
 CLWTLIDINHAFLYAKLEEEIYIHP-----GDVYVKNLALYGLKQSPKEWVNDHLRQYLNIGIGKDNSYTPGLY--  
 QTEDKNLMIAVYVDDCVIAASNEQR---LDEFINKLK-SNFELKITGTLIDVLDTDILGMDLVYNK-----  
 RLGTIDLTLKSFINRMDKKYK-----  
 >1731

-----MGLEYKALLANETWKLNRRCVACKWVYLKRDFKARLVAKGCSQKFGVDYFETFSPV-  
CRLESVRLILALAAEMQLYLHMDVCTAYLNSELKDTVYMKQPQGFDAAN--  
PDQVLLLRKAIYGLKQSGREWNKLDGVLKDLGKACNHEPCLYQQSGQGNLMLILVYVDDLILACQSRED----  
MEDLKAKIS-ESFECTDKGPLH----LFLGMEVQRDG-----DLGEITLGHYSQYIKELLRDYG-----  
>pCretro6  
-----MQREYDQLTKLGCWDLAQRKAIGCKWVYIKRNYKARLVAQGFSSQVPGVDYDETYAPV-  
MRPESLHILAAIAVILNLEWDIENAVGAYLNSQLKLTIMRQPEGFDDG----  
SGRVCKLNALYGLKQSGREWNLLLEFLRGIGRASSVDPVCVYLRIDEQSPTFLAVHVDLFLFAKTREI----  
MDKLGELS-SRFEMTDLGPVR----QILGYEVIRER-----DQRTLMLRQAAYIRKVLDRFN-----  
>Tnt-1  
-----MQEEMESLQNGTYKLGKRPLKCKWVFLKDYKARLVVKGFEQKKGIDFDEIFSPV-  
VKMTSIRTILSLAASLDLEVEQLDVKTAFLHGDLEEEIYMEQPEGFEVAGK--  
KHMVCKLNKSLYGLKQAPRWYMKFDSFMKSQTLKTYSDPCVYFKRSENNFILLLYVDDMLIVGKDKGL----  
IAKLGKGLS-KSFDMDKDLGPAQ----QILGMKIVRER-----TSRKLWLSQEKYIERVLERFN-----  
>Hydra1-2  
-----MEDEISSLQENNTFTLEGKHAVGGRWVYIKSNYKARYVAKGYSQVLGVDYIETFSPT-  
ANITSIRALMQMAAQYDLELHQMDVKTAYLHAPIDCKIYMEQPKGFVKS--  
DKLVCKLNKSLYGLKQLGRNWNKILHVYL TENDIQNLADYCVYSKRSGKDRVIIIWVDDLIIAASDNSL----  
LKDVKEMLT-SKFKMKDLGKLGK----HFLGIDFDQ-----SKGTVRVNQKRYILRILERFN-----  
>Copia  
-----NTELNAHKINNTWTIENKNIVDSRWVFKYNYKARLVARGFTQKYQIDYEETFAPV-  
ARISSFRFILSLAIQYNLKVHQMDVKTAFNLGSLKEEIMRPLPQGISCN----  
SDNVCKLNKAIYGLKQAARCWFEVFEQALKECEVNSSVDRCIYIDKNINENIYVLLYVDDVVIATGDMTR---  
MNNFKRYLM-EKFRMTDLNEIK----HFIGIRIEM-----HEDKIYLSQSAYVKKILSKFN-----  
>Koala  
-----MDEEYQALVTNKTWHLPNKNIIDCKWVYVVKRYKARLVAKGFRQRYGIDYEDTFSPV-  
IKMTTIRIILAIIVSKGWFLRQLDVKN AFLHGILEEEVYMYQPPGYEDKQH--  
PNYVCKLDKALYGLKQAPRAWFARLSHKLNLGQESKADTSLFFYNREGLTVFLLIYVDDIIVSSKSEA----  
IPILLQNLQ-QDFALKDLGNLH----YFLGIEVNQ-----SPNGIVLTQAKYANDLLRRSG-----  
>SIRE1-4  
-----MQEELEQFKRNEVWELEGTNVIKTKWIFNKTNKARLVAAQGYTQIEGVDFDETFAPV-  
ARLESIRLLLGVACILKFKLYQMDVKS AFLNGYLN EEEVYVEQPKGFADPTH--  
PDHVYRLKALYGLKQAPRAWYERL TEF LTQQGRKGGIDKTLFVKQDAENLMIAQIYVDDIVFGGMSNEM----  
LRHFVQQMQ-SEFEMSLVGELT----YFLGLQVKQ-----MEDSIFLSQSRYAKNIVKKKFG-----  
>Vitulo1-1  
-----KEEIAAIEKNETWELEDKNVIGVKWVFTKYLHKAQLVAKGYAQQHGVDDYDDTFSPV-  
ALFETVRTLLALAAHMHWCVYQFDVKS AFLNGELVEEVYVSQPEGFIVPGK--  
EEHVYRLKKTFLGKQAPRAWYSKIDSYFVENGERSKSDPNLYLKRQ-----DDMIYMGSSSFL----INEFKACMK-  
KKFEMSDLGLLH----FFLGLEA-----EDDTERADARRFRSLVG-----  
>CoDi6.3  
-----IRKEFRDMVVKRKVWRRSNRRCVKSXWVFIKRNFRARLVACGYSQIPGVDFSESYSYSPV-  
ANDITIRLLL VAMILFGLSAKIVDVETAFLYGELEEEVY MENPEGLEDSN---  
DDEALLLTTIYGLVQAARQYYKARGILRKIGTGGDVPCLFVKKSSLGIVFIALYVDDNLLVGHPKA----  
IECAIEQMKRHGLILKVEDDLK----DYLSCIEQFSK-----DKTKAWLGQPHLISNLMSKFG-----  
>CoDi6.7  
-----MQEEVQAHTENKLWELQGTPIIPAVWSMRKRRWKARLAFDGSKQIHGVNFWETYAPV-  
ASWPTIRYILTALINRWHMQQIDFVLA YTQAEAECEMFMKIPKGFVEHD--  
EEYVLRKKNYYGLKQAGRVWNQHLVSKLQECGKQSEHDQCLFY---RGRSVYVLYTDDSILAGPDLEE----  
LEQIKIDMANSGLKLTSEPGVS----DFLGVKIDR-----KGDEIHLTQPHLINSILDDLRL-----

**Dataset S3.** RT alignment generated by Mafft 7.402 and used to reconstruct the phylogenetic tree in Fig. 2.

>ZFERV-2  
QYPINKSALPEIKITIEELKRKGIKEV-DNAPTNSPIQAVAKP---DGGWRLVTNYK-ALNKQTPDTRYLINARDATGAA--  
PEGRLLSKIDLANGFWSVPLKPESRARTAFTH-----ENKQYVYVNLVLPQGFKNPNAFQAIMMEILKGLPI-----  
VVYIDDILIVTNDEEEHLKILDETL SRLTKEGFRLNYKKMEIAKDDVEFLGFQITGNERFLSQTTENKCLKELKEITTLKQL  
QSMGLGTLNFVRDLIPGYARHAKPLYNATKGGV-----LTW  
>AciFLERV  
QYPLNPGAVKEMDLIVRELLTLGVIRQE-LNPITNSPIQAVKKPESGGGWRPVINFK-  
ALNRRTVANRASLINPQGTLKTL--KLKPFKSCIDLANGFFSLRLTRGSQGKTAFTH-----  
KGRSYVWERLPQGYKNSPNVFAQAAVMDVLDGLGA-----  
TIYIDDVFIADDTTEEQLDRLQKIVERLTAAGLKLNLKCKQFGRKRVLYLGFQVSDD-  
LGLSEVYRKKIEQIEPPSSLNELQKVLGLCNVVRDYVPGYQRYAKPLYAKLKKPDETA--WNW  
>AliFLERV  
QYPLHPEAVAEMDKIVKELHALGIREE-PNPLTNSPIQAVKKPESAGGGWRPVINFK-  
ALNRRTVANRASLINPQGALKTL--RVKKYKSCIDLANGFFSLRLARESQQGKTAFTH-----  
KKGSYVWQRLPQGYRNSPNVFAQSAVLEILEDVGA-----  
SVYIDDVFIADDTTEEHLKRLEEVVKRISAAGLKLNLAKCQFGQFKVNYLGFQVTTD-  
LGLSDGYREKIQIQPPRCENDLQKILGLCNVVRDHPVNYQKYAKPLYACLKKEATTKA--WSW  
>FFV  
QYHINPKAKPDIQIVINDLLKQGVLIQ--KESTMNTPVYVVPKP---NGRWRMVLVDYR-AVNKVTPLIAVQNHQHSYGILGSL-  
-FKGRYKTTIDLSNGFWAHPVPEDYWITAFTW-----QGKQYCWTVLPQGFNLSPGLFTGDVVDLLQGIPI--V---  
EVYVDDVYISHDSEKEHLEYLDILFNRLKEAGYIISLKKSNANSIVDFLGFQITNEGRGLTDTFKEKLENITAPTTLQQL  
SILGLLNFARNFIPDFTELIAPLYALIPKSTKN-Y-VPW  
>BFV  
QYHINPRAKADIQIVIDDLLRQGVLRQ--QNSEMNTPVYVVPKA---DGRWRMVLVDYR-  
EVNKVTPLVATQNCHSASILNTL--YRGPYKSTLDLANGFWAHPKPEDYWITAFTW-----  
GGKTYCWTVLPQGFNLSPALFTADVVDILKDIPN--V---  
QVYVDDVYVSSATEQEHLDILETIFNRLSTAGYIVSLKSKLAKETVEFLGFSISQNGRGLTDSYKQKLMDLQPPTTLRQ  
LQSILGLINFARNFLPNAELVAPLYQLIPKAKGQ-C-IPW  
>EFV  
QYRINPKAKADIQIVIDDLLKQGVLKQ--QTSPMNTPVYVVPKP---DGRWRMVLVDYR-  
AVNKVTPAIATQNCHSASLLNTL--YRGQYKTTLDLANGFWAHPIQESDQWITSFTW-----  
NGKSYVWTTLPQGFNLSPALFTADVVDLLKDIPN--V---  
EVYVDDVYFSDNTEEEHLKTMDLLFQKLQTAGYIVSLKSKLQHTVDFLGFQITQTRGLTDSYKSKLLDITPPNTLK  
QLQSILGLLNFARNFIPNYSELITPLYQLIPLAKGI-Y-IPW  
>SFV  
QYHINPKAKPSIQIVINDLLKQGVLRQ--STSPMNTPVYVVPKP---DGKWRMVLVDYR-AVNKTIPLIAAQNQHSLGILTNL--  
IRHKYKSTIDLSNGFWAHPITEDSQWITAFTW-----EGKQHVWTRLPQGFNLSPALFTADVVDILKEVPG--V---  
SVYVDDIYISSPTMEEHFQVLDISFRKLEETGYIVSLKKSALARYEYVNLGFVISETRGLTSEFRERLQEIPTTLKQLQS  
ILGFLNFARNFVPNFSELVQPLYQLISTASGN-F-IQW  
>CoEFV  
QYPINTKAIPSIQVIVINELLEQGVLVK--QTSPTNMAVLPVVPKP---DGTWRLVLDYR-ALNKHSEPVRAQNQHSSGILANI--  
ERKAYKSSVDLANGFWSHPHIREEDWPKMAFTW-----CGFQYLWTRLPQGFNLSPALFSADVISLVGQLPG--V---  
YCYVDDIYLTHDTEEEHLKILDQVLEILIKAGYVINIKSKLCKRVDFLGFSLSDDEGRGLSDQYREKLAAIKPPQTLRQL  
QSVMGLLNFSRLFVKGFSELA KPLYDL-----  
>Loki-Xla  
QYRLPLAAYESLSEIVKNLEKKGIIRP--VHSSFNHPILGVLPK---NGQFRLCSDLR-QLNKRVMYMSGWVPVYIDQCLAQI--  
QGSKIFTALDCAQGYWTIKIDERDQHKLAFTF-----GKQYAWTRLPGFYINAGHEFAVFMHKAMPDAAERGT----  
LSYVDDILIKSTTFEEHIAELKYVL-----  
KLSLQKAQWCRSKVNFLGHEVTAEGINPQKKKVEAIKNTKSPTNLKELRSFLGMMNYSRKFDINYAEITKPLLQLLKKGA  
A---K-WEW  
>Loki-Xtr  
QYRLPLAAYESLSEIVKNLEKKGIIRP--VHSSFNHPILGVLPK---NGQFRLCSDLR-QLNKRVMYMSGWVPVYIDQCLAQI--  
QGSKIFTALDCAQGYWTIKIDERDQYKLAFTF-----GKQYAWTRLPGFYINAGHEFAVFMHKAMPDAAERGT----  
LSYVDDILIKSTTFGEHIAELRYVLNQLKAGVLSLQKAQWCRSKVNFLGHEITAEGINPQ-----EDRSW--  
VMNYSRKFDINYAEITKPLLQLLKKGA---K-WKW  
>Loki-Npa  
QYRLPLACYDSLAEIIRNLKERGVIRS--VHSSYNNPILGILKP---NGQWRLCADLR-  
QLNKRVMYMSGWVPVYIDQCLVQM--QGARIFTLDCAQGYWTIKVSPEDQYKLAFTF-----



GKEQYTWTRMPFGYINSGHEFAVFLHKAMPDATERGN----

LTYVDDILLKSTSFEKHVQEIRHVLNQLREAGVKISLQKAQWCRTKVNFLGHEVTSEGLNPQKKKVEAVMKSKTPTNV  
 SELRSFLGMMNYSRKFDIDNYAEISKPLLTLLKKDV---P-WMW

>Loki-Rca  
 QYRLPLASYESLAEIIRKLHERGIIRP--IHSSYNHPILGILKP---NGQWRLCADLR-QLNKRVYMSGWVPPYIDQCLAQL--  
 Q-SQVFSALDCAQGYWTIKVSEEDQYKLAFFS-----GNQYQCWVRMPFGYINSGHEFAVFMHKAMPDALERGT----  
 LAYVDDILIKSTDMTKHLTEL RHILGQLR-  
 AGVKLSIQKAQWCRTVNFLGHEVTSEGLNPQKKKVEAVFNCKVPTNLKELRSFLGMVNYSRKFIDIDNYAEISKPLHL  
 KKDT---E-WSW

>Loki-Ape  
 QYKIPLAAYESIQEILDKLLEKRIVRE--CNSTYNSPIWGALKP---TGKWRLTIDYR-PLNKQVPLSRWPMIHL DQELAKV--  
 KEARFFSTVDVANGFWTMTVDPVDQYKLAFFS-----CNQYTWNRCPFGYSNSPAEFNIFLHKAMSDASARGN----  
 LIYVDDILMRSRSDHDLAEIRHVLGQLAAAGAKLAIAGQWCRTKVEYVGLTVGANGIEPKAERIRAIQDIMAPVNV  
 KLSFLGVCNYSRQFIADYAEIARPLTELLGKDK---P-FLW

>Loki-Pfl  
 QYKIPLAAYESIQEILDKLLEKQIVRE--CNSTYNSPIWPVLKP---TGKWRLTIDYR-PLNKQVPLSRWPMIHL DQELAKV--  
 KEARFFSTVDVANGFWTMRVDPVDQYKLAFFS-----CNQYTWNRCPFGYSNSPAEFNIFLHKAMSDASARGN----  
 LIYVDDILMRSRSDHDLAEIRHILGQLAAAGAKLAIKQWCRTKVEYVGLTVGANGIEPKAERMRAIQDIMAPVNV  
 KLRSFLGVCNYSRQFIADYAEIARPLTELLGKDK---P-FLW

>Loki-Pyo  
 QYKIPLAAYESIQDILDITLLEKRIIRE--CNSTYNSPIWPVLKP---TGKWRLTIDYR-PLNKQVPLSRWPMIHL DQELAKV--  
 KGATFFSTVDVANGFWTMKVDQADQYKLAFFS-----GGSQYTWNRCPFGYSNSPSEFNIFLHKAMSDAATRGN----  
 LIYVDDILMRSQTFEDHITEIRHVLTLQSNAGAKLALTKGQWCRTKVKYVGLTVGADGIEPQAGRIRAIQDIKAPTRLTE  
 LRSFLGVCNYSRQFIADYAEIARPLNELLHKDK---P-FEW

>Loki-Sau  
 QYRIPLAAYESIQDILDITLQKQIIRE--CNSTYNSPIWPVLKP---TGKWRLTIDYR-PLNKQVPLSRWPMIHL DQELAKV--  
 KGACFFSTVDIANGFWTMKVDPADQYKLAFFS-----CNQYTWNRCPFGYSNSPAEFNIFLHKAMSDAAARGN----  
 LIYVDDILMRSCTFETHLAEIRHVLNQLTRAGAKLAIAGQWCRTKVEYVGLTVGGGIEPQGRIRAIQDIKAPTNVSE  
 LRSFLGVCNYSRQFIADYAEIARPLTELLCKDK---L-FQW

>Loki-Ofa  
 QYRIPLAAYESIQEILDITLQKQIIRE--CNSTYNSPIWPVLKP---TGKWRLTIDYR-PLNKQVPLSRWPMIHL DQELAKV--  
 KGACFFSTVDVANGFWTMRVNPADQYKLAFFS-----GNRQFTWNRCPFGYSNSPAEFNIFLHKAMSDAAARGN----  
 LIYVDDILMRSRTLE-  
 HLAEIRHVLNQLSAAAGAKLAIAGQWCRTKVEYVGLTVGADGIEPQAGRIRAIQDIKAPTGVSELRSFLGVCNYSRQFIE  
 DYAEIARPLTELLRKDK---S-FEW

>Loki-Bsp  
 QYRIPLAAYESIQEILDITLLEKQIIRE--CNSTYNSPIWPVLKP---TGKWRLTIDYR-PLNKQVPLSRWPMIHL DQELAKI--  
 KDAHFFSTVDVANGFWTMRVDPADQYKLAFFS-----GNRQYTWNRCPFGYSNSPAEFNIFLHKAMSDAAARGN----  
 LIYVDDILMRSQTFEGHLAEIRHVLSQLAAGAKLALTKGQWCRTKVKYVGLTVGQHGIEPQADRIQAIKAPNTLSG  
 LRSFLGVCNYSRQFVEDYAEIARPLTELLRNDT---P-YIW

>Loki-Cne  
 QYKIPLAAYESIQEILNKLLLEKNIIRE--CNSTYNSPIWPVLKP---TGKWRLTIDYR-ALNKQVPLSRWPMIHL DQELAKV--  
 KDARFFSTVDVANGFWTMKVDPADRYKLAFFS-----GNRQY--NRCPFGYSNSPAEFNIFLHKAMSDATERGN----  
 LIYVDDILMRSRTFKEHLEEI-  
 HVLGQLAAAGAKLALSQKQWCRRKVDYVGLTVGPNGIEPQADRIRAIQDIAAPTNLSELRSFLGVCNYSRQFIADYAD  
 MARPLTELLRKNT---P-FDL

>Loki-Lch  
 QYRIPLSSYESVQEILHTLMEREIIRE--CNSTYNSPIWPVLKP---NGKWRLTIDYR-QLNKQVPLSHWPMTYLDQNLTKI--  
 AGAKYFTLTDIANGFWTVKVDPKDQYKLAFFS-----GKRQYTWNRCPFGYLNSPADFNIFLHKAMPDAEERGN----  
 LIYVDDILIKSNSASDHLDEIRYVLTQLKNAGAKLSLTKGQWCRRVNYLGYDVGPDGLRPQQRNRIKAIQAIRSPTNITE  
 LRSFLGVCNYSRQFIENYAEISQPLTKLLRKNE---P-WVV

>Loki-Str  
 QYKIPLAAYAAVQEIISLLAKRIIRE--CNSTYSAPVWPVLKP---TGKWRLTIDYR-QLNKLVPVLSRWPMIHL DQELPKV--  
 ANAKYFSTVDVANGFWTMTVDPDQHKLAFFS-----SNKLFTRNCPFGYANSPEFNIFLHKAMPDAASRGT----  
 IYVDDVLMRSETWSSHLLNEMDHVLTQLGTAGAKLAIMKGQWCRTKVNYVGLLVGAEGILPQSNRIQAVRNIKTPTNL  
 HEVRSFLGVCNYSRQFIENYADLSKPLTHLLQKDT---P-FVW

>Loki-Tfu  
 QYKIPLESYEPVQEIINSMLEKGVIRL--CNSTCSAPIWPVLT---NGKWRTIDYR-KLNQVLSRWPMIHL DQELQEIIRV--  
 KGATIFSTLDVASGFWTIPVHPDDQHKLAFFM-----CNR-YTFTRCPFGYANSPEFNIFLNKACPDARVRGN----  
 LIYVDDVLMKSTTMDHLKEIDHVLQQLTKAGAKIALHKGQWCRTKVNYVGLLVGAEGILPQSNRIQAVRNIKPPANISE  
 LRSFLGVCNYSRQFIKDYSDIARPLMALLKKDS---P-FTW

>Loki-Lro

QYKIPLASYEPVQDIITSMLEKGVIRP--CNSTYSAPIWPVLKP---NGKWRPTIDYR-KLNQQVPLSRWPMTQLEQEIPRI--  
RGATIFSTLDVASGFWTIPVHPDDQHKLAFRF-----DNRQYTFTRCPFGYANSPAEFNIFLNKACPDARVRGN----  
LVFVDDILLKHTTVADHLKEIDHILNQLTTAGAKIALHKQGWCKIKVNYVGLLIGPQGIEPQTNRIQAIQNIKPPANVSEL  
RSFLGVCNYSRQFIENYSDIARPLTALLKKDC---P-FIW

>Loki-Dcl

QYKIPLASYEPVQEIIDSMLEKGVIRP--CNSTYSAPIWPVLKP---NGKWRPTIDYR-KLNQQVPLSRWPMTQLEQEIPRI--  
RGATIFSTLDVASGFWTIPVHPDDQHKLAFRF-----SNRQYTFTRCPFGYANSPAEFNIFLNKACPDARVRGN----  
LIYVDDVLMKSMTVADHLKEIDHVLHQLTAAGAKIALHKQGWGKSKVNYVGLLIGPQGIEPQSSRIQAIQTIKPPVNV  
ELRSFLGVCNYSRQFIENYSDIARPLTLLKKDC---P-FAW

>Loki-Sri

QYKIPLASYEPVQEIIDNLEKGIIRP--CNSTYSAPLWPVLKP---NGKWRPTIDYR-KLNQQVPLSRWPMTQLEQEIPKI--  
RDAKYFSTLDIASGFWTIPVHVADQHKLAFRF-----ANRQYTFTRCPFGYANSPAEFNIFLNKACPDANDRGT----  
LIYVDDILMRSSTLDTHLEIDHVLQTLTAAGAKISLKCQWCKTKVNYVGLLVGPRGVEPQINRVQGVNTNIKAPTNSVE  
LRSFLGVCNYSRQFIENYADLAKPLTELLRKDA---L-FVW

>Loki-Sme

QYKIPLASYEPVQEIIDDLLHRGIIRP--CNSTYSAPVWPVLKP---NGKWRPTIDYR-KLNQQVPLSRWPMTQLNQELPKV--  
KDAKYFSSMDIASGFWTIPVHIADQHKLAFRF-----AGRQYTFTRCPFGYANSPAEFNIFLNKSCPDASERGT----  
LIYVDDILIRTPMKGHIDEIEHVLDQLTTAGAKISLKCQWCKTKVNYVGLLVGSNGVEPQTNRVQGVMNKPTPTNISE  
LRSFLGVCNYSRQFIPDFADIAKPLTDLLKKDS---L-FTF

>Loki-Oja

QYKIPLASYEPVQEIIDDLTNKGIIRP--CNSTYSAPIWPVRKP---NGKWRPTIDYR-RLNQQVPLSRWPMTQLEQEIPRV--  
KEAKYFSTLDVASGFWTIPVHPDDQHKLAFRF-----ARQYTFTRCPFGYANSPAEFNIFLNKACPDATQRGT----  
LIYVDDILIRNATLEDHIEIEHVLDQLTSAGAKISLKCQWCRKTKVNYVGLLVGPTGVQPQVGRVQGLKDIAAPTNLKE  
LRSFLGVCNYSRQFIEDYADIAKPLTELLKQDV---P-FRW

>Loki-Ame

QYKIPLASYEPVQEIIDDLKGIIRP--CNSTYSAPLWPVLKP---NGKWRPTIDYR-RLNDQVPLSRWPMTQLEQEIPRV--  
RDAKYFSTLDVASGFWTIPVHVEDQHKLAFRF-----AGRQYTFTRCPFGYANSPAEFNIFLNKACPDARERGT----  
LIYVDDVLRNNSLDAHLEIDHVLQTLKAGAKISLKCQWCKTKVNYVGLLVGPDGVLQPCRAQGIIVDIAEPKTIH  
ALRSFLGVCNYSRQFIENFAELAKPLYQLLKQDV---P-FIW

>Loki-Bpe

QYKIPLASYEPIQEIIDDLTKGVIRP--CNSTYSAPIWPVLKP---NGKWRPTIDYR-QLNTRVPLSRWPMTQLGQDLPKV--  
RDAKYFSTLDIASGFWTIPVHPDDQHKLAFRF-----ANRQYTFTRCPFGYANSPAEFNIFLNKACPDARERGT----  
LIYVDDILIRTTTLDHKLKEIDHVLQTLTSAGAKISLKCQWCKTKVNYVGLL-----  
RSSRIQGITNLKVPANVSELRSFLGVCNYSRQFVEHYAELAKPLTDLLKKDE---T-FSW

>Loki-Lca

QYKIPLAAYESIQTLENLLKKNIIRE--CNSTYNSPIWPVLKP---TGKWRPTIDYR-QLNKTVPPLSRWPMAEIDHGLNQL--  
KGAKVLTMDLANGFWTMPVKETDQYKLAFTF-----DRIQYTWNRCPFGYANSPADFNIFLNKAMGDAKERGT----  
IVYVDDILVKDSSWQEHKSLQHTLEQLKEAGAKISIQKGQWARKRVDYLGFGQIGTEGLLPQTNRIEALLALKSPNTVPT  
LRSFLGVCNYSRQFVDDYAGITRPLVKLLQKDE---P-WEW

>Loki-Pma

QYKIPLAAYESIQTLENLLKKNIIIR--CNSTYNSPIWPVLKP---TGKWRPTIDYR-QLNKTVPPLSRWPMAEIDQNLNQL--  
KGAKVLTMDLSN-FWMPVKEADQYKLAFTF-----NGIYQYTWNRCPFGYANSPADFNIFLNKAMGDAKERGT----  
IVYVDDILVKDSSWEEHLESQHTLEQL--AAKISIQKGQWARKRVDYLGFGQIGT-  
GMLPQTKRLEALLALKPPTVTTLRSFLGVCNYSRQFVDDYAGIARPLVKLLQKDE---P-WEW

>Loki-Aro

KYRIPIAAHDPVQDTITEILHAGIIRK--CNSTYNSPIWPVLKP---SGKQSLTVDYR-KLNKQVPLSRCLWPTWMKPLQK--  
SRMPHTSQADISNGFCTIPVREQDQHKLAFRF-----NNVQ-TWTVTPFGYANSPAEFNIFLNKAIKIPDVNSKNI----  
AIYVDDILMWSDSWGEHQQLSYVLRSLQAGAKISLKGQWCKRAVNYLGFQVGGDGIRP---  
RTEAPKAIPAPTTLKLCSFLGICNFSQHFVADYAKISQPLTRLLKKDV---P-WTW

>SnRV

QYPVPDASHASIKETVEALLEQGVLRK--CNSTVNSAIWPVGKP---DGSWRLTIDYR-  
PLNSAVSCPYPYTVASTPELFAKLE-KKYQVYSSLDISNGFWSIRLEEECQYLAFTF-----  
DTQYQYTWRLPQGFHASPQIFHQUALYNGLASCKTESQGCQKLLQYVDDILLMSEDRDHHLRSLAILLQGLKDLGVKINPK  
KSHFCKDQVQYLGVNVGADTRSLIDARSQIRLTDIPLTVQGLRSALGLFNFCRAWIPEFSRKTQSLYDMLKGDG---K-  
LKW

>KoRV

QYPMSKEAREGIRPHIQRFDLGILVP--CQSPWNTPLLPVKKP--GTNDYRVPQDLR-  
EVNKRVDIHTVNPYNLLSSLP-PSHTWYVLDLKDAAFFCLKLHPNSQPLFAFEWRDPE-  
KGNTGQLTWRLPQGFKNSTPLFDEALHRDLASFRALNPQVVMLQYVDDLLVAAPTYRDCKEGTRRLQELSKLGYR  
VSAKKAQLCREEVTYLGYLLKGGKRWLTPARKATVMKIPTPTPRQVREFLGTAGFCRLWIPGFASLAAPLYPLTREKVV  
---P-FTW

>MuLV

QYPMSQEARLGKPHIQRLDQGILVP--CQSPWNTPLL PVKKP--GTNDYRPVQDLR-  
EVNKRVEDIHPTV PNPYNLLSGLP-PSHQWYTVLDLKD AFFCLRHLHPTQSLSFAFEWRDPE-  
MGISGQLTWTRLPQGFKNSPTLFDEALHRDLADFRVYYPALVLLQYVDDLLAAATSELDCCQGGTRALLQTLGDLGYRAS  
AKKAQICQKQVKYLYG YLLKEGQRWLTEARKETVMGQPTPKTPRQLREFLGTAGFCRLWIPGFAEMAAPLYPLTKTGT--  
-L-FEW

>FLV

QYPMPEAYQGKPHIRMLDQGILKP--CQSPWNTPLL PVKKP--GTEDYRPVQDLR-  
EVNKRVEDIHPTV PNPYNLLSTLP-PSHPWYTVLDLKD AFFCLRHLHSEQLLFAFEWRDPE-  
IGLSGQLTWTRLPQGFKNSPTLFDEALHSDLADFRVRYPALVLLQYVDDLLAAATRTECLEGKALLETLGNKGYRAS  
AKKAQICLQEVTYLGYSLKDGQRWLTKARKEAILSIPVPKNSRQVREFLGTAGYCRLWIPGFAELAAPLYPLTRPGT---  
L-FQW

>REV

QYPITLEAKRSLRETIHKFRAAGILRP--VHSPWNTPLL PVRKS--GTSEYRMVQDLR-EVNKR VETIHPTV PNPYTLLSLLP-  
PDRIWYSVLDLKD AFFCIP LAPESQLIFAFEWADAE-  
EGESGQLTWTRLPQGFKNSPTLFDVALNRDLQGFRLDHPVSLLQYVDDLLIAADTQAACL SATRDLLMTLAE LGYRV  
SGKKAQLCQE EVTYLGFKIHKGSRSLSNSRTQAILQIPVPKTKRQVREFLGTIGYCRLWIPGFAELA QPLYAATRGGN---  
P-LVW

>WDSV

QYPLPKDKTEGLRPLISSLENQGILIK--CHSPCNTPIFPIKKA--GRDEYRMIHDLR-AINNIVAPLTA VVASPTTVLSNLA-  
PSLHWFTVIDLSNAFFSVPIHKDSQYLFAFTF-----EGHQYTWTVLPQGFIHSPTLFSQALYQSLHKIKFKISS-  
EICIYMDDVLIASKDRDTNLKDTAVMLQHLASEGHKVS KKKLQCCQE VVYLGQLLTPEGRKILPDRKVTVSQFQQPTT  
IRQIRAFGLGVGYCRHWIPEFSIHSKFLEKQLK KDT---P-FQL

>Xen-1

QYPLKPAQSESINKQLQTLL ENGAIKR--QSSPCNTPLFPVKEK--GEDKYRLVQDLR-AVNEATVMETPLVSNPHTILSGIP-  
PSATHFRAVDLTNAFYSIPLREDCQYLFAFTH-----  
ERQQYVWTVLPQGAQNSPTLHSLALTSILDSWISSHPEITLLQYVDDLLCAPDLPTCEAS TDLLSFLADQGCKASKEK  
LQWCQTTVVFLGQCISQGRHITEGRIKTLQDIPLPKGHKPLHAFLGLISYCRSWIPEASLLMQPLYDV LKSD---P-FTM

>Amn-san

-----LQRGFIRP--STSPAGAGFFFVEKK---DGGLRPCIDYR-GLNKITVKNRYPLPLISELFDQL--  
KGAKIFS KLDLRGAYNLIRIREGDEWK TAFNT-----RDGHYEYL VMPFGLCNAPAVFQEFVNDIFRDLLGKSV---  
VVYLDDILIFSQDLETHRSQVKEALSRLRENFLFAKLEKCTFEVPKISFLGYIISRRGFEMDPAKVS AIQKWPLPQSTKAIQ  
RFIGFANYRQFIKDFS-----

>Sushi-ichi

-----LASGIIRP--SSSPLAAGFFFVAKE---DGGLRPCIDFR-KLNNITVKNKYPLPLMSSTFEPL--  
THARVFTKLDLRNAYHLVQIRKGDEWK TAFNT-----HLGHFEYL VMPFGLSNAPAVFQELVNDVLRDMINVFV---  
VVYLDDILIFSRTMEEHHQHVRVLVLRLENRLFIKAEKCIFHSASVGYLGYIVEEGRVRADPAKIQAVVEWPRPTDR TQ  
LRRFLGFAGFIRRFIKGFA-----

>CRM

-----LDKGYVRE--SLSPCAVPVILVPKK---DGTWRMCVDCR-AINNITIRYRHPRLDDMLDEL--  
SGAIVFSKVDLRSYHQIRMKLGDEWK TAFKT-----KFLYEWL VMPFGLTNAPSTFMRLMNEVLRAFIGKFV---  
VVYFDDILIYSKSMDEHVDHMRAVFNALRDARLFGNLEKCTFCTDRVSFLGYV VTPQGIEVDQAKVEAIHGWPMPKTI  
TQVRSFLGLAGFYRRFVKDFS-----

>Reina

-----LEQGVIQH--SSSPFASPVLVKKK---DGEWRLCVDYR-RLNAHTVKNRYPMPVFDEIVDEL--  
CGTKIFTKLDHRSGYHQIRIKEGDEFK TAFQT-----HNGHYEYR VMPFGLTGAPATFQDFM NKILTPFLRKC V---  
VVFLDDVLIYSRDMEEHVLQVKQVFQKLDHQ LKLSKCRFAQT TLEFLGHIISAEGIATDPEKVQVIRDWPIPNVKE  
VRSFLGMAGYRRFVAHYA-----

>Del

-----LNKGFIRG--STSPWGAHVLFDPKK---DDSKRMCIDYK--LNSVTVKNKYPLPRIDDLFDQL--NGA-  
YFSKIDLRFRYHQLRIR-ADIPK TAFRT-----RYGHYEFL VMPFGLTNVPTAFMNL MNRVFREYLDKFI---  
VVFDVYVLIYSRTQKDHEHHLRISLQLLRNNQLYAKLSKCEFWMEKVKFLGHVVSREGIVDPVKV KAVMNWELPKN  
IFEIRSFLGLAGYRRFIKGFA-----

>Galadriel

-----LDAGLIQP--SKAPYGAPVLFQKKQ---DGTMRMCVDYR-ALNKATIKNKYSVPLVQDLMDRL--  
SKACWFTKLDLRAGYQVRIAEGDEPK TTCVT-----RYGSYEFL VMPFGLTNAPATFCNLMNNV LFDYLD DDFV---  
VVYLDDIVIYSRTLEEHNHLSL VLSQLRKYTLVYKMEKCEFAQQEIKFLGHLVSKNQVRMDPKK VQAIVDWQAPRHV  
KDLRSFLGLANYYRKFIA GYS-----

>Maggy

-----LKKGFIRP--SSSVASPVLFVKKQ---GGGLRFCVDYR-ALNNITVKDRYPLPLVRETLNNL--  
AGMKFFSKIDIVSAFNNIRIKKGEEYLTAFRT-----RFLYESL VMPFGLTGAPATFQRYINDSLREYLDVFC---  
TAYLDDILIYSRTRTEHEEHLKLVLEALRKAGLYANAACEFFVTETKFLGLLVGVGKMDPEKITAVLDWQTPK KLT  
DVQAFGLGFGNFYRRFIR DFA-----

>Pyggy  
-----LDKGFIRV--SSLLAFLLVLFACKL---EGGLRLCIDYW-ALNAITRKNRYLLPLIRETLNNI--  
SKAKWFTKLDVIAAFYKIRVAEGDEWKTAFRT-----RFSLYEWLVTPFGMANSSTFQRYINWTLREYLDFC----  
SAYLDDVLIYTDLSLEQHQDHVRKVLKALQESGLNVDIKKCEFGVKSTKYLGLIIDAEGIRMDPEKVKAIMWE-----  
-----

>Skippy  
-----IRKGYIRP--SKSSAGFPVMFVPKP---NSNLRLVVDYR-QLNEITEKDRTSLPLITELKDRL--  
FGKKWFTALDLKSAYNLRIKEADEWKTAFRT-----KYGLFEYLVMPFGLTNAPAVFQRMITNVLREYLDIFV----  
VCYLLDILIFSDEEHTEHVHKVLKALQDANMLVEPTKSHFHQSQVTYLGHEISHNEIRMDRRKIAAVAWEKVPVTSVK  
ETQSFLGFANYRRFIKDAF-----

>Gypsy  
-----LKDGIIRP--SRSPYNSPTWVVDKK---NPNKRLVIDFR-KLNEKITPDRYPMPSPMILANL--  
GKAKFFTLDLKSQYHQIYLAEHDREKTSFSV-----NGGKYEFCLPFGLRNASSIFQRALDDVLRREQIGKIC----  
YVYVDDVIIIFSENESDHVRHIDTVLKCLIDANMRVSQEKTRFFKESVEYLGFIIVSKDGTKSDPEKVKAIQEYEPDCVYK  
VRSFLGLASYRVIKDAF-----

>Tom  
-----LEQGLIRE--SNSPYNSPTWVVPKK---KAKYRVVIDYR-KLNEITIPDRFPIPNMDEILGKL--  
GKCQYFTTIDLARGFHQIEMDSESIQKTAFT-----KRGHYEYVRMPFGLRNAPATFQRCMNNLRPLINKHC----  
LVYLLDDMIIFSTSLDEHLNSLQLVFEKLSSENLKQLDKCEFLKKEATFLGHIVTPDGIKPNPLKVEAIASYPITKVKR  
AFLGMTGYRKFIPSYA-----

>Zam  
-----LDQQIIRS--SHSPWSAPVWVVPKK---NRKWRLVIDYR-KLNDKTISDRYPININDILDSI--  
GKAKYFSTLDLTSGFHQIEMNPKDIAKTAFTV-----EGGHYEFTRMPFGLKNAPATFQRMDSVLGDLNGTIC----  
LFYLLDDIIIFPSLQKHLLDIKMVFEKLRANFKLQPSKSEFLRKEIEFLGHIVTQDGVKPNPNKISAIKFFPCPTNRAIKS  
FLGLGYRKFIRDAF-----

>Cer3  
-----IQSGRIVE--SNTPWTSPVLIKKK---NGSLRVCLDFR-KLNEVTVPDNYPLPRIDSIEQI--  
GGSKYFTSLDMANGYLQRLDAESSDKCGFIT-----ENKVYAYTHLPFGLRSAASYFQRDLKQVLG--LEKEV----  
TVYIDDVLIFFSKTFEEHLNSLRKVLERFRKFNKLVSPNKCEFFKQSITFLGHEINADNYKPNRINVDIVNLPTRNVGDV  
RRFIGMSGFFRKFIPNFS-----

>Mdg3  
-----LENGFIRP--SDSEYASPIVLVKKK---TGDLRMCVDFR-KLNKMTMKDNYPLPLIDLLDRM--  
NEKTVFTKLDLKNNGFFHVHVKKESIKYTSFVT-----PLGQYEWLRMPFGLKNAPSVMFQRFVNFIFADMIENKV----  
VVYMDILLATENINEHLETLKEIFKRLVENKLELRIDKCEFMQSSIKYLGFIINKDGIMPNDKGIEAIKNFPIPNNVHTVQ  
SFLGLCSYFRRFIKDFS-----

>TF1  
-----LKSGIIRE--SKAINACPVMFVPKP---EGTLRMVVDYK-PLNKYVKPNYPLPLIEQLLAKI--  
QGSTIFTKLDLKSAYHLIRVRKGDEHKLAFC-----PRGVFEYLVMPYGIAPAHFYFINTILGEAKESHV----  
VCYMDLILHHSKSESEHVHKVVDVLQKLNANLIINQAKCEFHQSQVKFIGYHISEKGFTPCQENIDKVLQWKQPKNRK  
ELRQFLGSVNYLRKFIPKTS-----

>Mdg1  
-----IKDGIVEQ--SISEYNSPLLVPKK---EKRWRLVVDYR-QINKKLLADKFPLPRIEDILDQL--  
GRAKYFSLDLMSGFHQIELDERSRNITSFST-----STGAYRYTRLPGFKIAPNSFQRMMTLAFSGLTPSQA----  
FLYMDLVLVIGCSEKHMLKNLTDVFKLCRQHNLKLPHEKCTFFMKEVTYLGHKCTDKGILPDDSKYEVIKNYPKPVNA  
DEARRFVAFCNYYRRFIKNFA-----

>Gmr1  
-----LKLGVIEE--SRSAWASPIVLVPKP---DGTHRFCNDFR-RLNEVSDFSDSYPMPRVDELIERL--  
GPARYLSTLDLTKGYWQVPLAPSSREKTAFT-----PGGLFYQYTVLPGVHGAPATFQRMMDQVLRPH-SSYA----  
AAYIDDIIHSASWDEHVKHVRAVLNGLRAAGLTANPAKCRGREETAYLGYRVGRGNVRPQEDKVAIAIREWPQPQTK  
KQVRSFLGLVGYQRFIGYA-----

>Woot  
-----LDLGVIKR--EASPYASPMTVGKKK---DGTVRICLDAR-MINSKMIADCESPPAADELLRRF--  
HEIRYMSTIDLRSSYWQIPLSPESRQYTAFLY-----NGRSYTYQVLPFGLKTAVGSFSRAMDVVLGTEVREFV----  
VNYIDDLLVASETLNEHLEHLRQVFEKQARMTINLEKSNFIQKEVKFLGHILTINGIKADPEKISAIRNFPVPQKTKHV  
RAFLGLCNFYRKFICARYA-----

>Tor4a  
-----LENKLIPE--CSPWNSPSSLVRKK---DGRFRLVIDYR-RLNDATLQMHHPNPLEDSISYL--  
EKSRVYSMCDMIKGFHQIDLDEDSKQKTAFTSN-----EFGQFYTRMPMGCKNAPSFFMRIMDKALLGVKKTEI----  
IAYMDLLCHSQTEVEHIKILEKLFQILAVNLRINSKKAFFTDVSNFCGYDISNGKICPSQDKIEAIQKLIKIPRTKDAAQ  
SLFGALNYHRRFIRNFA-----

>Kabuki

-----QELGICRP--SKIAWASPLHIVPKK---NGDLRPCGDYR-QLNAITKPDRIPIPRRHDFTYIL--  
DDKKIFSGLDINRAFHCIDVAPEDIEKTAIT-----PFLGFEPKMTFGLRNAPQTFQRFMNNTVLHGLE-FL----  
FSYLLDDVIIASEPTQHNEHLRIVFERFNSYGITINLDKCCFGQPKVEFLGHEVSVNGITPLKKNVEAINFPKPETVSDLR  
FLGMVNFYRPHLPNSA-----  
>Cer4  
-----LDLEVELEPI-THSDWAAPIVVIRKK---DGKVRVCADFKCSLNLSLIEEIHPLPTSDDLFGTL--QGC-  
IFSGLDKDAYLQIALDSESQKLA VINT-----HKGLFKYRRMTFGLKPAPAKFQKIIDKMIAGLPG--V----  
AAYLDDVIVSANSLEEHEKVLHELLKRIKDYGFRISPEKCNFAQSEITFLGFIDKRGRRPDPKKT SVIRSMKAPT  
DQKQLMSFLGAICFYGRFVPKMS-----  
>Mag  
-----LAAGVIKPV-DHSDWATPLVVVRKA---DGGLRICADYKVTLNKVLAI DRFPVPMEDLFSNL--  
SGNKFFTKLDLSQAYNQIVLSERSSEYTVINT-----HRGLFKYSRLVYGLASSPGIFQKLMVMNMFKNV  
PN--V----  
VVFYDDILIRNQDLDSLKSIKEVLDILERYGLKIKRSKCEFMVTEVRYLGFIIIDQNGVRVDP  
EKVKSIATMPHPNNVTELKSFIMVNFYSKFIQDLA-----  
>SPM  
-----GKAGVIKKV-KNSRWAAPIVTVPKS---DGSVRLCGDYKQTVNKVLEEDVYPLPTCEDLFANL--  
AGGKVFSLKIDLSNAYLQLELTDKSKELLTIHT-----HKGLYQYERLPGFVSTAPAVFQSVMDRILGG  
MKG--V----  
CCYLLDILISSENEEDHIKTLNEVLGRLQEYGVKAKKEKCSFMVSRVIYLGHEIDGKGVHPTKEK  
VEGICDAKRPENKDELRTFIGIVVYAKFVFNLA-----  
>SURL  
-----YELDVITPVDEPTDWVSSLVVMKK---NGQLRVCLDPR-DLNRAIKREHYQLPSRAEITAHF--  
AGAKYFSKLDASSGFWQIQLDDESSKLCFTIT-----PYGRYKFLRPLFGICSAPEVYHKIVHQMFA  
HIPG--V----  
NTMMDDVIVWGTTQOEHDNRLREVLSIARRMNLKLNKDKCEFSVKKLTFIGDLISDQGVQDP  
PKKVSAILNMRPKCRKDVQRFLGMINYQKGFIPDLA-----  
>Athila4-1  
-----SDSTWVSPVHCVPKK---ITGHRMCIDYR-KLNAASRKDHFPLPFIDQMLERL--  
ANHPYYCFLDGYSGFQIPIHPNDQEKTTFTC-----PYGTFAKRMPLFCNAPATFQRCMTSIFSD  
LIEEMV----  
EVFMDDFSVYGPSFSSCLLNLRVLRCEETNLVNLWEKCHF MVKEGIVLDHKISEK GIEVDK  
GKVEVMMQLQPPKTVKDIRSFLGHAGFYRRFIKFA-----  
>Diaspora  
-----SDSQWVSPVQVVPKK---QNNWRVCIHYR-RLNQVTKKDHFLPFIDQILECL--  
AGKSHYCFLDGFSGYMQITIALEDQEKTTFTC-----LFGTFAYRRMSFGLCNAPGTFQRCMISIF  
SDFLENCI----  
EEFMDDFTVYGSSFDGCLDSLEKVLNRRRIETNLVNLFEKCHF MVQEGIVLGHII  
SNKGIEVDPAKISVISQLPYPSCV-EVRSFLGHAGFYRCFIRDFS-----  
>RetroSor1  
-----LDAKVIREV-IYPEWLANVVLVPPK---NGKMRMCIDFT-DLNKACVKDSFPLPRIDTSVDKA--  
AGCQRFSLDCFSGYHQIWLKKEDEGKASFTT-----PFGTYCYTRMPEGLKNAGATFSRMMGK  
VLGSQ LQRNI----  
IAYVDDVVMSKRKEDHIKDLQETFNLR SAGLKNPEKCVFVSKGKMLGYIISSEGIRANPDKTK  
AIMSMAEPSNKKEVQRLTGRIAALNRFISRSA-----  
>Tat4-1  
-----LGAGSIVEV-KYPEWLANPVVVKKK---NGKLRVCIDFT-DLNKACPKDSFPLPHIDRMVEAT--  
TGNELLSFMDAFSGYNQIPMHKDDQEKTSFIT-----DRGTYCYKVMFGLKNAGARYQRLVNQMF  
APQLGKTM----  
EVYIDDMLVKSKSADHIEHLTACFETLNKYNMKNLPAKCSFGVTSGEFLGYIVTKRGIEANPK  
QIQAILDLKSPRNKKEVQRLTGRIAALNFIARST-----  
>Cigr-1  
-----LEEEIIEP--SNSPWRAQVLVAREG---SKKPRMVIDYSQTVNVFTELDAYPLPSIESIVNKV--  
TQDKVYSSDLRSAYHQIPLKDSDRPFTAFEA-----EGQLYQYKRLPFGVTNGVSAFQRIINRFI  
QDNHLNKV----  
YAYLDDITVTGETLEEHRNLKLLVA AKRHNL TINEEKSKLRMTSIDFLGYRISYGDARPD  
PERLRPLLNLPPPDPRELKRIQGMFAYYAKWISRFSA-----  
>Tor1  
-----EDAGIIEKA-SGSSFNAPLQLVRKS---SGGYRICVDMR-SLNNRLAESKWPLPSLAETLES  
L--  
AGTAFVSCVDIRQAFFHMALTDESKHLTAFSA-----LNCQYQFRRLPMGLKISPSVYQMAMK  
ETLGNLGNKA----  
VVYLLDDVLTGRTEDHEALDVLDRLRKAGFLNPKCILGVKKTTFGLGHEVTTEGYYPKTDN  
LAAIREFPKPTNKALRRFIGMTAFYSTLVPKLQ-----  
>Tor2  
-----AKDGIIEP--DGKGFHSPLVIVRKK---TGGLRICSDFKSSLNQCLDETTWPLPQMDH  
LFANI--  
HGHRIFTSLDVSKAYWNLLIDPRDRHKTNFTE-----DNKCWMYVRLPFGKLFSGDAFCRSIS  
SMLDRVSKSNF----  
CNYVDDVLA YSSDCETHVKVLQQIFSACRHFGARLGAKKCTFGQASTAFMGRISAEGISIPPEN  
METILALKPPTTRKQVQSLIGNFCWLKSWVSANL-----  
>HERV-L  
QYCIP-GGIAEISATIKDLKDAGVVIP--TTSPFN SPIWPVQKT---DGSWRMTVDYH-  
KLNQVVTPIAVPVDPVVSLLLEQINTSPGTWYAAIDLANAFFSIPVHKAHQKQFAFSW-----

QGQQYTFTVLPQGYINSPALCHNLIQRDLDDLHLPQDITLVHYIDDIMLIGSSEQEVANTLDLLVRHLHARGWEINLTK  
 IQGPSTSVKFLGVLVQWCACDIVPSKVVDKLLHLAPPTTKKEAQCLVGLFGFWRQHIPHLGVLLWPI-----  
 >MuERV-L  
 QYCIP-GEIAEITATIKDLKDAGVVVP--TSPFNSPIWPVQKT---DGSWRMTVDYR-  
 KLNQVVTPIAAAVDPDVSLLEQINTSPGTWYAAIDLANAFFSVPVHKDHQKQIAFSW-----  
 QGQQYTFTVLPQVYINSPALCHNLRDLDRLD-  
 LPQSITLVHYIDDIMLVGPSEQEVATTLDSLVTMIRIRGWEINPTKIQGPSTSVKFLG--  
 VQWCACRDIPSKVDKLLHLAPPTTKKEAQRLVGLFGFWRQHIPHLGVLLRPI-----  
 >SRV-1  
 QWPLTSEKLAQAQLVQEQLEAGHITE--SNSPWNTPIFVIKKK---SGKWRLQDLR-AVNATMVLMGALQPGLPS-  
 PVAI--  
 PQGYLKIIIDLKDCFFSIPLHPSDQKRFAFSLPSTNFKPEMQRQFQWKVLPQRMANSPTLCQKYVATAIHKVRHAWKQMYI  
 IHYMDDILLIAGKDGQVLCFDQLKQELTIAGLHIAPEKIQ-LQDPYTYLGFELNGPKITNQKA---  
 VIRKDKLQTLNDFQKLLGDINWLRPYLKLTTADLKLPLFDTLKGDSNPNS----  
 >MMTV  
 QWPLKQEKLQALQQLVTEQLQLGHLEE--SNSPWNTPVFVIKKK---SGKWRLQDLR-AVNATMHDMGALQPGLPS-  
 PVAV--  
 PKGWEIIIIDLQDCFFNIKLPEDCKRFAFSPSPNFKRPYQRFQWKVLPQGMKNSPTLCQKFVDKAILTVRDKYQDSYI  
 VHYMDDILLAHPSRSIVDEILTSMIQALNKHGLVVSTEKIQ-KYDNLKYLGTHTIQGDSVSYQKL---  
 QIRTDKLRTLNDFQKLLGNINWIRPFLKLTGELKPLFEILNGDSNPIS----  
 >JSRV  
 -----MMHMGALQPGLPT-PSAI--  
 PDKSYIIVIDLKDCFYTIPLAPQDCKRFAFSLPSVNFKEPMQRYQWRVLPQGMTNSPTLCQKFVATAIAPVRQRFQLYL  
 VHYMDDILLAHTDEHLLYQAFSILKQHLSLNGLVIADEKIQ-THFPYNYLGFSLYPRVYNTQLV---  
 KLQTDHLKTLNDFQKLLGDINWIRPYLKLPTYTLQPLFDILKGSDPAS----  
 >LDV  
 QWPLTAQKLDVQNIQDILLKDGRIIP--SRSQWNSPIFVIQKK---DSKFRMLHDLR-AVNALIKDWGALQPPTPW-PGAI--  
 PSEWPIAMDISDCFFSIPLAERDSEFAFTIPSPNLREPAKRYQWTVLPQGMKNSPYICQVVAEVIRPIRERFRDAVIII  
 YMDDILIAAAEERQTEVIFEAVKTTCEKGLKINEAKTQ-RAPEVSYLGWRVMETGIAPLT-----  
 VQLPETVTNLVQLQRLGIIQWLKPILSLRPEQLQVFYDLLKGGKTRPEE----  
 >RSV  
 QWPLPEGKLVALTQLVEKELQLGHIEP--SLSCWNTPVFVIRKA---SGSYRLLHDLR-AVNAKLVPFQAVQQGAPV-LSAL-  
 -  
 PRGWPLMVLDLKDCFFSIPLAEQDREAFATLPSVNNQAPARRFQWKVLPQGMTCSPTICQLVVGQVLEPLRLKHPSLC  
 MLHYMDLILLAASSHDGLEAAGEEVISTLERAGFTISPDKVQ-REPGVQYLGYKLGSTYVAPVG-----  
 LVAEPRIATLWDVQKLVGSLQWLRPALGIPRMLGPFYEQLRGSDPNEA----  
 >HIV-1  
 QWPLTEEKIKALVEICTEMEKEGKISKIGPENPYNTPVFAIKKK---STKWRKLVDFR-ELNKRTQDFWEVQLGIPH-PAGL-  
 -  
 KKKKSVTVLDVGDAYFSVPLDEDFRKYTAFTIPSPINNETPGIRYQYNVLPQGWKGSFAIFQSSMTKILEPFRKQNPDIYI  
 QYMDDLIVGSDEIGQHRTKIEELRQHLLRWGLTTPDKKHQ-KEPPFLWMGYELHPDKWTVQPI---  
 VLPEKDSWTVNDIQKLVGKLNWASQIYPGIK--VRQLCKLLRGTKALTE----  
 >FIV  
 QWPLTNEKIEALTEIVERLEREGKVKRADPNPNWNTPVFAIKKK---SGKWRLIDFR-ELNKLTEKGAEVQLGLPH-  
 PAGL--  
 QIKKQVTVLDIGDAYFTIPLDPDYAPYTAFTLPRKNNAGPGRRFVWCSLPQGWLSPLIYQSTLDNIIQPFIRQNPQLDIYQ  
 YMDDIYIGSNSKKEHKEKVEELRKLWWGFETPEDKLQ-EPPYTWMGYELHPLTWTIQQK---  
 QLDIPEQPTLNELQKLAGKINWASQAIPDLS--IKALTNMMRGNQNLNSTRQW  
 >EIAV  
 QWPLTKEKLEGAKEIVQRLLESEGKISEASDNNPNYNSPIFVIKKR---SGKWRLQDLR-ELNKTVQVGTSEISRGLPH-PGGL--  
 IKCKHMTVLDIGDAYFTIPLDPEFRPYTAFTIPSPINHQPDKRYVWKCLPQGFVLSPIYIYQKTLQEIQLPFRERYPEVQLY  
 QYMDDLFMGSNSKKQHKELIILRAILLEKGFETPDDKLQ-EVPPYSWLGYLQCPENWKVQKM---  
 QLDMVKNPTLNDVQKLMGNITWMSSGIPGLT--VKHIAATTKGCLELNQKVIW  
 >HTLV-2  
 PISFKPERLQALNDLVSKALEAGHIEP--YSGPGNNPVFPVKKP---NGKWRFIHDLR-ATNAITTTLSPSPGPPD-LTSLP-  
 TALPHLQITIDLTAFFQIPLPKQYQPYFAFTIPQPCNYGPGTRYAWTVLPQGFKNSTPLFEQQLAAVLNPMRKMFPSTI  
 VQYMDDILLASPTNEELQQLSQLTLQALTTHTGLPISQEKTOQTGQIRFLGQVISPNHITYEST---  
 PTIPIKSQWTLTELQVILGEIQVWSKGTPILRKHLQSLYSALHGYPDRA----  
 >BLV  
 QFPLNLERLQALQDLVHRSLEAGYISP--WDGPGNNPVFPVRKP---NGTWRFVHDLR-ATNALTKPIPALSPGPPD-LTAIP-  
 THLPHIICLDLKAFFQIPVEDRFRSYFAFTLPTPGGLQPHRRFAWRVLPQGFINSALFERALQEPLRQVSAAFSQSLLVS

YMDDILIASPTEEQRSQCYQALAARLRDLGFQVASEKTRQTPSPVPFLGQMVHNQIVTYQSL---  
PTLQISSPISLHQLQAVLGDLQWVSRGTPTRRPLQLLYSSLKGIDDPRA----

**Dataset S4.** RT alignment generated by PROMALS3D and used to reconstruct the phylogenetic tree in Fig. 2.

```
>SURL
-----VITPVDTDWVSSLVVMKK-NGQLRVCLDPRDLNRAIKREHYQLPSRAEITAHFA--
GAKYFSKLDASSGFWQIQLDDESSKLCFTFIP-----YGRYKFLRLPFGICSAPEVYHKIVHQMFAHIP-----
GVNTMMDDVIVWGTTQOEHDNRLREVL SIARRMNLKLNKDKCEFSVKKLTFIGDLISDQGVQDPKVSAILNMERPK
CRKDVQRFLGMINYQKGFIPDLA-----
>Cigr-1
-----IIEPSNSPWRAQVLVAREG-SKKPRMVIDYSTVNVFTELDAYPLPSIESIVNKVT--
QDKVYSSLDLRSAYHQIPLKSDRPFTAFAEAE-----GQLYQYKRLPFGVTNGVSAFQRIINRFIQDNHL----
NKVYAYLDDITVTGETLEEHDRLKLLVAAKRHNLTINEEKSKLRMTSIDFLGYRISYGDARPDPERLRPLLNLPPDPT
PRELKRIQGMFAYYAKWISRFS-----
>Amn-san
-----LQRGFIRPSTSPAGAGFFFVEKK-DGGLRPCIDYRGLNKITVKNRYPLPLISELFDQLK--
GAKIFSKLDLRGAYNLIRIREGDEWKTA FNTR-----DGHYEYLVMPFGLCNAPAVFQEFVNDIFRDLLG----
KSVVVYLDLIFSDLETHRSQVKEALSRLRENFLFAKLEKCTFEVPKISFLGYIISRRGFEMDPAKVSIAIQKWPLPQSTK
AIQRFIFGANYYRQFIKDFS-----
>Sushi-ichi
-----LASGIIRPSSSPLAAGFFVAKE-DGGLRPCIDFRKLNNITVKNKYPLPLMSSTFEPLT--
HARVFTKLDLRLNAYHLVQIRKGDEWKTA FNTH-----LGHFEYLVMPFGLSNAPAVFQELVNDVLRDMIN----
V FVVVYLDLIFSRTEEEHQHVRLVLRQLLENRLFIAEKCFHSASVGYLGYIVVEGRVRADPAKIQAVVEWPRPTD
RTQLRRFLGFAGFIRRFIKGFA-----
>Reina
-----LEQGVIOHSSSPFASPVLVKKK-DGEWRLCVDYRRLNAHTVKNRYPMVPVDFEIVDEL C--
GTKIFTKLDHRSYHQIRIKEGDEFKTA FQTH-----NGHYEYRVMFPFGLTGAPATFQDFMKNILTPFLR----
KCVVYFLDDVLIYSRDMEEHVLQVKQVFQKLDHQLKLSKCRFAQTTFLEFLGHIISAEGIATDPEKVQVIRDWPINN
VKEVRSFLGMAGYRRFVAHYA-----
>Del
-----LNKGFIRGSTSPWGAHVLFDPKK-DDSKRMCIDY-KLNSVTVKNKYPLPRIDDLFDQLN---
GAYFSKIDLRFYHQQLRIRA-DIPKTA FRTR-----YGHYEFLVMPFGLTNVPTAFMNLMMNRVFREYLD----
KFIVVFDVYVLIYSRTQKDHEHHLRISLQLLRNQLYAKLSKCEFWMKVKFLGHVVSREGIVDPVKVAVMNWELP
KNIFEIRSFLGLAGYRRFIK GFA-----
>CRM
-----LDKGYVRESLSPCAVPVILVPKK-DGTWRMCVDCRAINNITIRYRHPIPRLDDMLDELS--
GAIVFSKVDLRSGYHQIRMKLGDEWKTA FKTK-----FGLYEWLVMPFGLTNAPSTFMRLMNEVLRAFIG----
KFVVVYFDLILYSKSMDEHVDHMRAVFNALRDARLFGNLEKCTFCTDRVSFLGYVVTPOGIEVDQAKVEAIHGWPMP
KTITQVRSFLGLAGFYRRFVKDFS-----
>Galadriel
-----LDAGLIQPSKAPYGAPVLFQKKQ-DGTMRMCVDYRALNKATIKNKYSVPLVQDLMDRLS--
KACWFTKLDLRAGYWQVRIAEGDEPKTTCVTR-----YGSYEFLVMPFGLTNAPATFCNLMNNVLFDYLD----
DFVVVYLDLIVYSRTLEEHNHLSLVLSQLRKYTLYVKMEKCEFAQQEIKFLGHLVSKNQVRMDPKKVQAIVDWQAP
RHVKDLRSFLGLANYYRKFIA GYS-----
>Skippy
-----IRKGYIRPSKSSAGFPVMFVPKP-NSNLRLLVVDYRQLNEITEKDRTSLPLITELKDRLF--
GKKWFTALDLKSAYNLIRIKEADEWKTA FRTK-----YGLFEYLVMPFGLTNAPAVFQRMITNVLREYLD----
IFVVCYLDLIFSDTEEEHTEHVHVKLQANMLVEPTKSHFHQSQVTYLGHEISHNEIRMDRRKIAAVA EWKVPTS
VKETQSFLGANYYRFIK DFA-----
>Maggy
-----LKKGFIRPSSSSVSPVLFVKKQ-GGGLRFCVDYRALNNITVKDRYPLPLVRETLNLA--
GMKFFSKIDIVSAFNRIKKGEEYLTAFRTR-----FGLYESLVMPFGLTGAPATFQRYINDSLREYLD----
VFCTAYLDDLIVSRTRTEHEHLKLVLEALRKAGLYANAACEFFVTETKFLGLLVGVGKMDPEKITAVLDWQTPK
KLTDVQAFLGFGNFYRRFIR DFA-----
>Pyggy
-----LDKGFIRVSSLLAFLVLFAKKL-EGGLRLCIDYWALNAITGKNRYLLPLIRETLNNS--
KAKWFTKLDVIAAFYKIRVAEGDEWKTA FRTR-----FSLYEWLVTPFGMANSLTFQRYINWTLREYLD----
EFCSAYLDDVLIYTDLSLEQHQDHVRKVLRLQESGLNVDIKKCEFGVKSTKYLGLIIDAEGIRMDPEKVKAIMWE-----
-----
>TF1
-----LKSGIRESKAINACPVMFVPKK-EGTLRMVVDYKPLNKYVKPNYPLPLIEQLLAKIQ--
GSTIFTKLDLKSAYHLIRVRKGDEHKLA FRCP-----RGVFEYLVMPYGI STAPAHFYFINTILGEAKE----
```



SHVVCYMDLILHKSSESEHVKHVKDVLQKLKNNANLIINQAKCEFHSQVVKFIGYHISEKGFTPCQENIDKVLQWKQPK  
NRKELRQFLGSVNYLRKFIPKTS-----  
>Kabuki  
-----QELGICRPSKIAWASPLHIVPKK-NGDLRPCGDYRQLNAITKPDYPIPRRHDFTYILD--  
DKKIFSKLDINRAFHCDVAPEDIEKTAIITP-----FGLFEFPKMTFGLRNAPQTFQRFMNNTVLHGL----  
EFLFSYLDDVIIASESPTQHNEHLRIVFERFNSYGITINLDCFCGQPKVEFLGHEVSVNGITPLKNKVEAIINFPKPEVSD  
LRRFLGMVNFYRPHLPNSA-----  
>Cer3  
-----IQSGRIVESNTPWTSPIVLIKKK-NGSLRVCLDFRKLNEVTPDNYPLPRIDSIEEQIG--  
GSKYFTSLDMANGYLQRLDAESSDKCGFITE-----NKVYAYTHLPFGLRSAASYFQRDLKQVLGLEK-----  
EVTVYIDDLVIFSKTFEEHLNSLRKVLERFRKFNLK VSPNKCEFFKQSITFLGHEINADNYKPNRINVDIAIVNLPTPRNVG  
DVRRFIGMSGFFRKFLPNFS-----  
>Mdg3  
-----LENGFIRPSDSEYASPIVLVKKK-TGDLRMCVDFRKLNKMTMKDNYPLPLIDDLDRMN--  
EKTVFTKLDLKNQFFHVHVKKESIKYTSFVTP-----LGQYEWLRMPFGLKNAPSVFQRFVNFADMIEMIE----  
NKVVVYMDLILATENINEHLETLKEIFKRLVENKLELRIDKCEFMQSSIKYLGFIINKDGIMPNDKGIEAIKNFPIPNVH  
TVQSFLGLCSYFRFFIKDFS-----  
>Cer4  
-----LDLEVLEPITSDWAAPIVVIRKK-DGKVRVCADFCKSLNNSIEIHLPLTSDDLFGTLQ--  
GCIFSKIDLKDAYLQIALDSESOQLAVINTH-----KGLFKYRRMTFGLKPAPAKFQKIIDKMIAGLP-----  
GVAAAYLDDVIVSANSLEEHEKVLHELLKRIKDYGFRISPEKCNFAQSEITFLGFIDKRGRRPDPKTSVIRSMKAPTQK  
QLMSFLGAICFYGRFVPMKMS-----  
>Mag  
-----LAAGVIKPVDSWATPLVVVRKA-DGGLRICADYKTLNKVLAIDRFVPMKEDLFSNLS--  
GNKFFTKLDLSQAYNQIVLSERSSEYTVINTH-----RGLFKYSRLVYGLASSPGIFQKLMVNMFKNVP-----  
NVVVVYDDILIRNQDLDSLKSIKEVLDILERYGLKIKRSCFEMVTEVRYLGFIDQNGVRVDPEKVKSIATMPHPNNV  
TELKSFIGMVNFYSKFIQDLA-----  
>SPM  
-----GKAGVIKVKSRWAAPIVVIRKK-DGKVRVCADFCKSLNNSIEIHLPLTSDDLFGTLQ--  
GGKVFSKIDLSNAYLQLELTDKSKELLTIHTH-----KGLYQYERLFPFVSTAPAVFQSVMDRILGGMK-----  
GVCCYLDDILISSENEEDHIKTLNEVLGRLQEYGVKAKKEKCSFMVSRVIYLGHEIDGKGVHPTKEKVEGICDAKRPEN  
KDELRTFIGIVVYAKFVFNLA-----  
>Athila4-1  
-----STWVSPVHCVPKK-GTGHRCIDYRKLNAASRKDHFPPLPFIDQMLERLA--  
NHPYYCFLDGYSGFQIPIHPNDQEKTTFTCP-----YGTFAKRMFPFGLCNAPATFQRCMTSIFSDFLE----  
EMVEVFMDDFSVYGPSFSSCLLNLGRVLRCEETNLVLNWEKCHFMVKEGIVLDHKISEKGIEVDKGGKVEVMMQLQPP  
KTVKDIRSFLGHAGFYRRFIKDFA-----  
>Diaspora  
-----SQWVSPVQVVPKK-TNNWRVCIHYRRLNQVTKKDHFPPLPFIDQILECLA--  
GKSHYCFLDGFSGYMQITALEDQEKTTFTCL-----FGTFAKRMFPFGLCNAPATFQRCMISIFSDFLE----  
NCIEEFMDDFTVYSSFDGCLDSLEKVLNRRRIETNLVLNFEKCHFMVKEGIVLDHKISEKGIEVDPAKISVISQLPYPCV-  
EVRSFLGHAGFYRCFIRDFS-----  
>Gypsy  
-----LKDGIIIRSPSPYNSPTWVVDKK-NPNKRLVIDFRKLNEKTIPDRYPMPSPMILANLG--  
KAKFFTTLDLKSQYHQIYLAEHDRKTSFSVN-----GGKYEFKRLPFGLRNASSIFQALDDVLREQIG----  
KICYVYVDDVIFSENESDHRHIDTVLKLIDANMRVSEQEKTRFFKESVEYLGFIYVSKDGTGSDPEKVKAIQYEPEDCV  
YKVRSLGLASYYRVFIKDFA-----  
>Tom  
-----LEQGLIRESNSPYNSPTWVVPKK-KAKYRVVIDYRKLNEITIPDRFPIPNMDEILGKLG--  
KCQYFTTIDLARGFHQIEMDSESIQKTAFTK-----RGHYEYVRMPFGLRNAPATFQRCMNNILRPLIN----  
KHCLVYLDLDMIFSTSLDEHLNSLQLVFEKLSLNLKQLDKCEFLKKEATFLGHIVTPDGKPNPLKVEAIASYPITKVK  
EIRAFLGMTGYRKFIPSYA-----  
>Zam  
-----LDQQIIRSSHSPWSAPVWVVPKK-NRKWRLVIDYRKLNDKTISDRYPININDILDSIG--  
KAKYFSTLDLTSFGHQIEMNPKDIAKTAFTVE-----GGHYEFTRMPFGLKNAPATFQRMDSVLGDLNG----  
TICFLYLDLDMIFSTSLQKHLIDIKMVFEKLRANFKLQPSKSEFLRKEIEFLGHIVTQDGVKPNPNKISAIKKFCPTNRAI  
KSFLGLGYRKFIRDFA-----  
>Mdg1  
-----IKDGIVEQSISEYNSPLLLVPKK-EKRWRLVVDYRQINKKLLADKFLPRIEDILDQLG--  
RAKYFSCLDLMSGFHQIELDERSRNITSFSTS-----TGAYRYTRLPFGLKIAPNSFQRMMLAFSGLTP----  
SQAFLYMDDL VVIGCSEKHMLKNTDVFKLQRHNLKLHPEKCTFFMKEVYTLGHKCTDKGILPDDSKYEVIKNYPKP  
VNADEARRFVAFCNYYRFFIKNFA-----

>Tor4a

-----LENKLIIEPCSSPWNSPSSLVVRKK-DGRFRLVIDYRRLNDATLQMHHPNLEDSISYLE--  
KSRVYSMCDMIKGFHQIDLDEDSKQKTAFSNE-----FGQFQYTRMPMGCKNAPSFMRIMDKALLGVKK----  
TEIIAYMDDLCHSQTEVEHIKILEKLFQILAVNNLRINSKKAFFTDVSNFCGYDISNGKICPSQDKIEAIQKLIKIPRTKDA  
AQSLFGALNYHRRFIRNFA-----

>Gmr1

-----LKLGVIEESRSAWASPIVLVPKP-DGTHRFCNDFRRLNEVSDFSDSYPMPRVDELIERLG--  
PARYLSTLDLTKGYWQVPLAPSSREKTAFAFP-----GGLFQYTVLPGVHGAPATFQRMMDQVLRPHS----  
SYAAAYIDDIIHSASWDEHVKHVRAVLNGLRAAGLTANPAKCRLGREETAYLGYRVGRGNVRPQEDKVA AireWPQP  
QTKKQVRSFLGLVGYQRFIPGYA-----

>Woot

-----LDLGVIKREASPYASPMTVGKKK-DGTVRICLDARMINSKMIADCESPPAADELLRRFH--  
EIRYMSTIDLRSSYWQIPLSPESRQYTAFLYN-----GRSYTYQVLPFGLKTA VGSFSRAMDVVLGTEVR----  
EFVVNYIDDLLVASETLNEHLEHLRQVFEKLKQARMTINLEKSNFIQKEVKFLGHILTINGIKADPEKISAIRNFPVPQKTK  
HVRAFLGLCNFYRKFCARYA-----

>RetroSor1

-----LDAKVIREVIPEWLANVVLVPPK-NGKMRCIDFTDLNKACVKDSFPLPRIDTSVDKAA--  
GCQRFSLDCFSGYHQIWLKKEDEGKASFTP-----FGTYCYTRMPEGLKNAGATFSRMMGKVLGSQLQ----  
RNIIAYVDDVVMMSKRKEDHIKDLQETFVNLRSAGLKNPEKCVFVSGKMLGYIISSEGIRANPDKTKAIMSMAEPS  
NKKEVQRLTGRIAALNRFISRSA-----

>Tat4-1

-----LGAGSIVEVKPEWLANPVVVKKK-NGKLRVCIDFTDLNKACPKDSFPLPHIDRMVEATT--  
GNELLSFMDAFSGYNQIPMHKDDQEKTSFITD-----RGTYCYKVMPPFGLKNAGARYQRLVNQMFAPQLG----  
KTMEVYIDDMLVKSKKADHIEHLTACFETLNKYNMKNLPAKCSFGVTSGEFLGYIVTKRGIEANPKQIQAILDLKSPRN  
KKEVQRLTGRIAALNFIARST-----

>Tor2

-----AKDGIIEPCPKGFHSPLVIVRKK-TGGLRICSDFKSSLNQCCTDIWPLQMDHLFANIE-  
HGHRIFTSLDVSKAYWNLLIDPRDRHKTNFTFD-----NKCWMYVRLPFGLKFSGDAFCRSISSMLDRVSK----  
SNFCNYVDDVLA YSSDCETHVKVLQQIFSACRHFGARLGAKKCTFGQASTAFMGRIISAEGISIPPENMETILALKPPTTR  
KQVQSLIGNFCWLKSWVSANL-----

>SRV-1

QWPLTSEKLAQAQLVQEQLLEAGHITESNSPWNTPIFVIKKK-SGKWRLQLDLRAVNATMVLMGALQPGLPSPAIP---  
QGYLKIIIDLKDCFFSIPLHPSDQKRFASFSLPSTNFKPMQRFQWKVLPQRMANSPTLCQKYVATAIHKVRHAWKQMYII  
HYMDDILIAAGKDGQVQLQCFDQLKQELTIAGLHIAPEKIQL-QDPYTYLGFELNGPKITNQKAVIR---  
KDKLQTLNDFQKLLGDINWLRPYLKLTTADLKLPLFDTLKGDSPNS

>MMTV

QWPLKQEKLQALQQLVTEQLQLGHLEESNSPWNTPVFVIKKK-SGKWRLQLDLRAVNATMHDMGALQPGLPSPAIVP-  
--  
KGWEIIIDLQDCFFNIKLHPEDCKRFAFSVSPNFKRPYQRFQWKVLPQGMKNSPTLCQKFVDKAILTVRDKYQDSYIV  
HYMDDILLAHPRSIVDEILTSMIQALNKHGLVVSTEKIQK-YDNLKYLGTHIQGDSVSYQKLQIR---  
TDKLRTLNDFQKLLGNINWIRPFLKLTGELKPLFEILNGDSNPIS

>JSRV

-----MHMGALQPGLTPSAIP---  
DKSYIIVIDLKDCFYTIPLAPQDCKRFAFSLPSVNFKEPMQRYQWRVLPQGMTNSPTLCQKFVATAIAPVRQRFPLYL  
HYMDDILLAHTDEHLLYQAFSILKQHLNGLVIADEKIQT-HFPYNYLGFSLYPRVYNTQLVKLQ----  
TDHLKTLNDFQKLLGDINWIRPYLKLPTYTLQPLFDILKGDSDPAS

>LDV

QWPLTAQKLDVQNIQDILLKDGRIIPSRSQWNSPIFVIQKK-DSKFRMLHDLRAVNALI-KDWGALQPGTPWPGAIP--  
SEWPVIAMDISDCFFSIPLAERDSERFAFTIPSNLREPAKRYQWTVLPQGMKNSPYICQVVAEVIPIRERFRDAVIIHY  
MDDILIAAAEERQTEVIFEAVKTTCEKGLKINEAKTQR-APEVSYLGWRVWETGIAPLTVQL-----  
PETVTNLVQLQRLGIIQWLKPILSRPEQLQVFYDILLKGTREE

>RSV

QWPLPEGKLVALTQLVEKELQLGHIEPSLSCWNTPVFVIRKA-SGSYRLLHDLRAVNAKL-VPFGAVQQGAPVLSALP--  
RGWPLMVLDLKDCFFSIPLAEQDREAFATLPSVNNQAPARRFQWKVLPQGMTCSPTICQLVVGQVLEPLRLKHPSLC  
MLHYMDDLLAASSHDGLEAAGEEVISTLERAGFTISPDKVQR-EPGVQYLGYKLGSTYVAPVGLVA-----  
EPRIATLWDVQKLVGSLQWLRPALGIPPRMGPFFYEQLRGSDPNEA

>HIV

QWPLTEEKIKALVEICTEMEKEGKISKIGNPNYTPVFAIKKK-STKWRKLVDFRELNKRT-QDFWEVQLGIPHPAGLK--  
KKKSVTVLDVGDAYFSVPLDEDFRKYTAFTIPSINNETPGIRYQYNVLPQGWKGSIPAIFQSSMTKILEPFRKQNPDIYIYQ  
YMDDL YVGSDEIGHQRTKIEELRQHLLRWGLTTPDKKHQK-EPPFLWMGYELHPDKWTVQPIVLP----  
EKDSWTVNDIQKLVGKLNWASQIYPGIK--VRQLCKLLRGTKALTE

>FIV

QWPLTNEKIEALTEIVERLEREGKVKRADNPWNTPVFAIKKK-SGKWRMLIDFRELNKLT-EKGAEVQLGLPHPAGLQ--  
 IKKQVTVLDIGDAYFTIPLDPDYAPYTAFTLPRKNNAGPGRRFVWCSLPQGWILSPLIYQSTLDNIIQPFIRQNPQLDIYQY  
 MDDIYIGSNSKKEHKEKVEELRKLWVWFETPEDKLQE-EPYTWMGYELHPLTWTIQKQLD----  
 IPEQPTLNELQKLAGKINWASQAIPDLS--IKALTNMMRGNQNLNS  
 >EIAV  
 QWPLTKEKLEGAKEIVQRLLSEGKISEASNPYNSPIFVIKKR-SGKWRLQDLRELNKTV-QVGTEISRGLPHPGGLI--  
 KCKHMTVLDIGDAYFTIPLDPEFRPYTAFTIPSINHQEPDKRYVWKCLPQGFVLSPIYQKTLQEILQPFREYRYPEVQLYQ  
 YMDDLFMGSNSKKQHKEIILRAILLEKGFETPDDKLQE-VPPYSWLGYLCPENWKVQKMQLD----  
 MVKNPTLNDVQKLMGNITWMSSGIPGLT--VKHIAATTKGCLELNQ  
 >MuLV  
 QYPMSQEARLGKPHIQRLLDQGILVPCQSPWNTPLLPVKKPGTNDYRPVQDLREVNKRVEDIHPTVPNPYNLLSGLP-  
 PSHQWYTVLDLKDFAFFCLRLHPTSQSLFAFEWRDPE-  
 MGISGQLTWTRLPQGFKNSTPLFDEALHRDLADFRIQHPDLILLQYVDDLLAATSELDCQQGTRALLQTLGDLGYRAS  
 AKKAQICQKQVKYLYLLKEGQRWLTEARKETVMGQPTPKTPRQLREFLGTAGFCRLWIPGFAEMAAPLYPLTKTGT  
 FEW  
 >KoRV  
 QYPMSKEAREGIRPHIQRFLDLGILVPCQSPWNTPLLPVKKPGTNDYRPVQDLREVNKRVQDIHPTVPNPYNLLSSLP-  
 PSHTWYSVLDLKDFAFFCLRLHNSQPLFAFEWRDPE-  
 KGNTGQLTWTRLPQGFKNSTPLFDEALHRDLASFRALNPQVVMLQYVDDLLVAAPTYRDCKEGTRRLQELSKLGYR  
 VSAKKAQLCREEVTYLGYLLKGGKRWLTPARKATVMKIPTPTTPRQVREFLGTAGFCRLWIPGFAELAAPLYPLTREK  
 PFTW  
 >FLV  
 QYPMPEAYQGKPHIRMLDQGILKPCQSPWNTPLLPVKKPGTNDYRPVQDLREVNKRVEDIHPTVPNPYNLLSTLP-  
 PSHPWYTVLDLKDFAFFCLRLHSESQLLFAFEWRDPE-  
 IGLSGQLTWTRLPQGFKNSTPLFDEALHSDLAADFRVYPALVLLQYVDDLLAAATRTECLEGKALLETGNKGYRAS  
 AKKAQICLQEVTYLGYSLKDGQRWLTARKEAILSIPVKNRSRQVREFLGTAGYCRWLWIPGFAELAAPLYPLTRPGTLFQ  
 W  
 >REV  
 QYPITLAKRSLRETIHKFRAAGILRPVHSPWNTPLLVRKSGTSEYRMVQDLREVNKRVETIHTVPNPYTLLSLLP-  
 PDRIWYSVLDLKDFAFFCIPLAPESQLIFAFEWADAE-  
 EGESGQLTWTRLPQGFKNSTPLFDVALNRDLQGFRLDHPVSLLQYVDDLLIAADTQAACL SATRDLLMTLAE LGYR  
 SGKKAQLCQEEVTYLGFKIHKGSRSLSNSRTQAILQIPVPKTKRQVREFLGTIGYCRWLWIPGFAELAAPLYAATRGGNDP  
 LV  
 >Tor1  
 -----MEDAGIIEKASSFNAPLQLVRKS-SGGYRICVDMRSLNNRLAESKWPLPSLAETLESLEA--  
 GTAFFSCVDIRQAFFHMALTDESKHLTAFSAL-----NCQYQFRRLPMGLKISPSVYQMAMKETLGNLDGN---  
 KAVVYLDLVTGRTEDEHLEALDVLDRLRKAGFLLNPKCILGVKKTTFGLGHEVTTEGYYPKTDNLAAIREFPKPT  
 NKKALRRFIGMTAFYSTLVPKLQ-----  
 >Loki-Xla  
 QYRLPLAAYESLSEIVKNLEKKGIIRPVHSSFNHPILGVLPK-NGQFRLCSDLRQLNKRVMYMSGWVPVYIDQCLAQIQ--  
 GSKIFTALDCAQGYWTIKIDERDQHKLAFTFG-----KQYAWTRLPFGYINAGHEFAVFMHKAMPDAAE---  
 RGTLSYVDDILIKSTTFEEHIAELKYVL-----  
 KLSLQKAQWCRSKVNFLGHEVTAEGINPQKKKVEAIKNTKSPTNLKELRSFLGMMNYSRK FIDNYAEITKPLLQLLKKG  
 AKWEW  
 >Loki-Xtr  
 QYRLPLAAYESLSEIVKNLEKKGIIRPVHSSFNHPILGVLPK-NGQFRLCSDLRQLNKRVMYMSGWVPVYIDQCLAQIQ--  
 GSKIFTALDCAQGYWTIKIDERDQYKLAFTFG-----KQYAWTRLPFGYINAGHEFAVFMHKAMPDAAE---  
 RGTLSYVDDILIKSTTFGEHIAELRYVLNQLKKAGVKLSLQKAQWCRSKVNFLGHEITAEINPQ-----  
 VMNYSRK FIDNYAEITKPLLQLLKKGAKWKW  
 >Loki-Npa  
 QYRLPLACYDSLAEIIRNLKERVIRSVHSSYNNPILGVLPK-NGQWRLCADLRQLNKRVMYMSGWVPVYIDQCLVQM--  
 GARIFTALDCAQGYWTIKVSPEDQYKLAFTFG-----KEQYTWTRMPFGYINSGHEFAVFLHKAMPDATE---  
 RGNTLYVDDILIKSTSFEEKHVQEIRHVLNQLREAGVKISLQKAQWCRTKVNFLGHEVTSEGLNPQKKKVEAVMKS  
 TPTNSELRSFLGMMNYSRK FIDNYAEISKPLLTLKKDVPWMW  
 >Loki-Rca  
 QYRLPLASYESLAEIIRKLHERGIIRPIHSSYNHPILGVLPK-NGQWRLCADLRQLNKRVMYMSGWVPVYIDQCLAQLQ--  
 SQVFSALDCAQGYWTIKVSEEDQYKLAFTFG-----NQYCWVRMPFGYINSGHEFAVFMHKAMPDALE---  
 RGTLAYVDDILIKSTDMTKHL TELRHILGQLR-  
 AGVKLSIQKAQWCRTVNFLGHEVTSEGLNPQKKKVEAVFNCKVPTNLKELRSFLGMVNYSRK FIDNYAEISKPLLHL  
 KKDTEWSW  
 >Loki-Sri

QYKIPLASYEPVQEIIDNLLKGIIRPCNSTYSAPLWPVLKP-NGKWRLTIDYRKLNQVPLSRWPMTQLEQELPKIR--  
 DAKYFSTLDIASGFWTIPVHVADQHKLAFTFA-----NRQYTFTRCPFGYANSPAEFNIFLNKACPDAND----  
 RGTLIYVDDILMRSSTLDTHLEEDHVLQLETAAGAKISLSKQWCKTKVNYVGLLVGPRGVEPQINRVQGVNTNIKAPT  
 NVSELSFLGVCNYSRQFIENYADLAKPLTELLRKDALFWW  
 >Loki-Ape  
 QYKIPLAAYESIQEILDKLLEKRIVRECSTYNSPIWGALKP-TGKWRLTIDYRPLNKQVPLSRWPMIHLDQELAKVK--  
 EARFFSTVDVANGFWTMTVDPVDQYKLAFSFC-----NRQYTNRCPCFGYSNSPAEFNIFLHKAMSDASA----  
 RGNLIYVDDILMRSRFDHDLAEIRHVLGQLAAAGAKLAIAGQWCRTKVEYVGLTVGANGIEPKAERIRAIQDIMAPV  
 NVSKLQSFLGVCNYSRQFIADYAEIARPLTELLGKDKPFLW  
 >Loki-Pfl  
 QYKIPLAAYESIQEILDKLLEKQIVRECSTYNSPIWPVLKP-TGKWRLTIDYRPLNKQVPLSRWPMIHLDQELAKVK--  
 EARFFSTVDVANGFWTMRVDPVDQYKLAFSFC-----NRQYTNRCPCFGYSNSPAEFNIFLHKAMSDASA----  
 RGNLIYVDDILMRSRFDHDLAEIRHILGQLAAAGAKLAIAGQWCRTKVEYVGLTVGANGIEPKAERMRAIQDIMAPV  
 NVSKLRSFLGVCNYSRQFIADYAEIARPLTELLGKDKPFLW  
 >Loki-Pyo  
 QYKIPLAAYESIQDILDTLLEKRIIRECSTYNSPIWPVLKP-TGKWRLTIDYRPLNKQVPLSRWPMIHLDQELAKVK--  
 GATFFSTVDVANGFWTMDQADQYKLAFSFC-----GSQYTNRCPCFGYSNSPSEFNIFLHKAMSDAAT----  
 RGNLIYVDDILMRSQTFEDHITEIRHVLTLQSNAGAKLALTKGQWCRTKVKYVGLTVGADGIEPQAGRIRAIQDIKAPTR  
 LTELRSFLGVCNYSRQFIADYAEIARPLNELLHKDKPFWE  
 >Loki-Sau  
 QYRIPLAAYESIQDILDLLKQIIRECSTYNSPIWPVLKP-TGKWRLTIDYRPLNKQVPLSRWPMIHLDQELAKVK--  
 GACFFSTVDIANGFWTMDVDPADQYKLAFSFC-----NRQYTNRCPCFGYSNSPAEFNIFLHKAMSDAAA----  
 RGNLIYVDDILMRSCTFETHLAEIRHVLNQLTRAGAKLAIAGQWCRTKVEYVGLTVGGSGIEPQTGRIRAIQDIKAPT  
 VSELSFLGVCNYSRQFIADYAEIARPLTELLCKDKLQW  
 >Loki-Ofa  
 QYRIPLAAYESIQEILDNLLKQIIRECSTYNSPIWPVLKP-TGKWRLTIDYRPLNKQVPLSRWPMIHLDQELAKVK--  
 GACFFSTVDVANGFWTMRVNPADQYKLAFSFC-----NRQYTNRCPCFGYSNSPAEFNIFLHKAMSDAAA----  
 RGNLIYVDDILMRSRTLE-  
 HLAEIRHVLNQLSAAGAKLAIAGQWCRTKVEYVGLTVGADGIEPQAGRIRAIQDIKAPTGVSELSFLGVCNYSRQFIE  
 DYAEIARPLTELLRKDKSFEW  
 >Loki-Bsp  
 QYRIPLAAYESIQEILDLLKKEIIRECSTYNSPIWPVLKP-TGKWRLTIDYRPLNKQVPLSRWPMIHLDQELAKIK--  
 DAHFFSTVDVANGFWTMRVDPADQYKLAFSFC-----NRQYTNRCPCFGYSNSPAEFNIFLHKAMSDAAA----  
 RGNLIYVDDILMRSQTFEGHLAEIRHVLSQLLAAGAKLALTKGQWCRTKVKYVGLTVGQHIEPQADRIQAIRTIKAPN  
 TLSGLRSFLGVCNYSRQFVEDYAEIARPLTELLRNDTPYIW  
 >Loki-Cne  
 QYKIPLAAYGSIQEILNLLKNIIRECSTYNSPIWPVLKP-TGKWRLTIDYRALNKQVPLSRWPMIHLDQELAKVK--  
 DARFFSTVDVANGFWTMDVDPADRYKLAFSFC-----NRQY--NRCPCFGYSNSPAEFNIFLHKAMSDATE----  
 RGNLIYVDDILMRSRTFKEHLEEI-  
 HVLGQLAAAGAKLALSQGWCRKKVDYVGLTVGPNGIEPQADRIRAIQDIAAPTNLSELSFLGVCNYSRQFIADYAD  
 MARPLTELLRKNTPFDL  
 >Loki-Lch  
 QYRIPLSSYESVQEILHTLMEREIIRECSTYNSPIWPVLKP-NGKWRLTIDYRQLNKQVPLSHWPMTYLDQNLTKIA--  
 GAKYFTTLDIANGFWTVKVDPKDQYKLAFSFC-----KRQYTNRCPCFGYLNSPADFNIFLHKAMPDAEE----  
 RGNLIYVDDILIKSNSASDHLDEIRYVLTQLKNAGAKLSLTKGQWCRTKRVNYLGYDVGPDGLRPQQNRKAIQAIRSPT  
 NITELRSFLGVCNYSRQFIENYAEISQPLTKLLRKNPWWV  
 >Loki-Str  
 QYKIPLAAYA AVQEIISLLAKRIIRECSTYSAPVWPVLKP-TGKWRLTIDYRQLNKLVPVPLSRWPMTQLDQELPKVA--  
 NAKYFSTVDVANGFWTMTVDPDQHKLAFSFS-----NKLFTFNRCPCFGYANSPSEFNIFLHKAMPDAAS----  
 RGTIYVDDVLMRSETWSHHLNEMDHVLTQLGTAGAKLAIMKGQWCRTKVNYYVGLLVGAEGILPQSNRIQAVRNIKT  
 TNLHEVRSFLGVCNYSRQFIENYADLSKPLTHLLQKDTPFVW  
 >Loki-Tfu  
 QYKIPLASYEPVQEIINSMLEKGVIRLCNSTCSAPIWPVLTP-NGKWRLTIDYRKLNQVPLSRWPMTQLEQEIPRVK--  
 GATIFSTLDVANGFWTIPVHPDDQHKLAFMFC-----NRYTFTRCPFGYANSPAEFNIFLNKACPDARV----  
 RGNLIYVDDVLMKSTTMDHLKEIDHVLQQLTKAGAKIALHKGQWCRTKVNYYVGLPIAPQGIERTNRIQAIQNIKPPA  
 NISELSFLGVCNYSRQFIKDYSDIARPLMALLKKDPSFTW  
 >Loki-Lro  
 QYKIPLASYEPVQDIITSMLEKGVIRPCNSTYSAPIWPVLKP-NGKWRLTIDYRKLNQVPLSRWPMTQLEQEIPRIR--  
 GATIFSTLDVANGFWTIPVHPDDQHKLAFRFD-----NRQYTFTRCPFGYANSPAEFNIFLNKACPDARV----  
 RGNLVFVDDILLKHTTVADHLKEIDHILNQLTTAGAKIALHKGQWCRTKIKVNYYVGLLIGPQIEPQTNRQAIQNIKPPAN  
 VSELSFLGVCNYSRQFIENYSDIARPLTALLKKDCPFIV  
 >Loki-Dcl

QYKIPLASYEPVQEIIDSMLEKGVIRPCNSTYSAPIWPVLKP-NGKWRTIDYRKLNQVPLSRWPMTQLEQEIPRIR--  
 GATIFSTLDVASGFWTIPVHPDDQHKLAFSTFA-----NRQYTFTRCPFGYANSPAEFNIFLNKACPDARV----  
 RGNLIYVDDVLMKSMTVADHLKEIDHVLHQLTAAGAKIALHKGQWGKSKVNYVGLLIGPQGIEPQSSRIQAIQTIKPPV  
 NVSELSRFLGVCNYSRQFIENYSDIARPLTLLKKKDCPFAW  
 >Loki-Sme  
 QYKIPLASYEPVQEIIDLLHRGIIRPCNSTYSAPVWPVLKP-NGKWRTIDYRKLNQVPLSRWPMTQLNQELPKVK--  
 DAKYFSSMDIASGFWTIPVHIADQHKLAFSTFA-----GRQYTFTRCPFGYANSPAEFNIFLNKSCPDASE----  
 RGTLIYVDDILIRTPMTKGHIDEIEHVLQDLTTAGAKISLSKCQWCKTKVNYVGLLVGSNGVEPQTNRVQGMNIKTPT  
 NISELSRFLGVCNYSRQFIPDFADIAPLTDLLKKKDSLFTF  
 >Loki-Oja  
 QYKIPLASYEPVQEIIDDLTNKGIIRPCNSTYSAPIWPVRKP-NGKWRTIDYRRLNQVPLSRWPMTQLEQEELPRVK--  
 EAKYFSTLDVASGFWTIPVHPDDQHKLAFSTFA-----RQYTFTRCPFGYANSPAEFNIFLNKACPDATQ----  
 RGTLIYVDDILIRNATLEDHIEIEHVLKQLTSAGAKISLSKCQWCRKTKVNYVGLLVGPTGVQPQVGRVQGLKDIAAPT  
 LKELRSFLGVCNYSRQFIEDYADIAPLTELKLDVPPFRW  
 >Loki-Ame  
 QYKIPLASYGPVQEIIDDLTKGIIRPCNSTYSAPLWPVLKP-NGKWRTIDYRRLNQVPLSRWPMTQLEQEELPRVR--  
 DAKYFSTLDVASGFWTIPVHVEDQHKLAFSTFA-----GRQYTFTRCPFGYANSPAEFNIFLNKACPDARE----  
 RGTLIYVDDILIRNNSLDAHLEEIDHVLQDLTKAGAKISLAKCQWCKTKVNYVGLLVGPDGVLQPQCRAQGIVDIAEPK  
 TIHALRSFLGVCNYSRQFIENFAELAKPLYQLLKQDVPIFW  
 >Loki-Bpe  
 QYKIPLASYEPIQEIIDDLTKGVIRPCNSTYSAPIWPVLKP-NGKWRTVDYRQLNTRVPLSRWPMTQLGQDLPKVR--  
 DAKYFSTLDIASGFWTIPVHPDDQHKLAFSFA-----NRQYTFTRCPFGYANSPAEFNIFLNKACPNAAAS----  
 RGTLIYVDDILIRTTLLDDHLKEIDHVLQDLTSAGAKISLSKCQWCKTKVNYVGLL-----  
 RSSRIQGITNLKVPANVSELSRFLGVCNYSRQFVEHYAELAKPLTDLLKKDETFWSW  
 >Loki-Lca  
 QYKIPLAAYESIQUETLENLKKNIIRECNSTYNSPIWPVLKP-TGKWRTIDYRQLNKTVPPLSRWPMAEIDHGLNQIK--  
 GAKVLTMTDLANGFWTMPVKETDQYKLAFTFD-----RIQYTWNRCPFGYANSPADFNIFLHKAMGDAKE----  
 RGTIVYVDDILVKDSSWQEHLSLQHTLEQLKEAGAKISIQKQWARKRVDYLGFGQIGTEGLLPQTNRIEALLALKSPNT  
 VPTLRSFLGICNYLRQFVDDYAGITRPLVKLLQKDEPWEW  
 >Loki-Pma  
 QYKIPLAAYESIQUETLENLKKNIIRKCNSTYNSPIWPVLKP-TGKWRTIDYRQLNKTVPPLSRWPMAEIDQNLNQIK--  
 GAKILTTMDLSN-FWTMPVKEADQYKL--TFN-----GIQYTWNRCPFGYANSPAD-NIFLHKAMGDAKE----  
 RGTIVYVDDILVKDSSWEEHLESQHTLEQLE--AAKISIQKQWARKRVDYLGFGQIGT-  
 GMLPQTKRLEALLALKPPTVTTLRSFLGICNYLRQFVDDYAGIARPLVKLLQKDEPWEW  
 >Loki-Aro  
 KYRIPIAAHDPVQDITTEILHAGIIRKCNSTYNSPIWPVLKP-SGKQSLTVDYRKLNKQVPLSRCLWPTWMKPLQKS--  
 RMPHTSQADISNGFCTIPVREQDQHKLAFSFN-----NVQWTWVTPFGYANSPAEFNIFHKAIPDVNS----  
 KNIAIYVDDILMWSDSWGEHQQLLSYVLRSLQAGAKISLDKGQWCKRAVNYLGFQVGGDGIIRPTEAP---  
 KAIPAPTTLQKLSFLGICNFSQHVFVADYAKISQPLTRLLKKDVPWTW  
 >ZFERV-2  
 QYPINKSALPEIKITIEELKRKGIIEVDAPNTSPIQAVAKP-DGGWRLVTNYKALNKQTPDTRYLINARDATGAAP--  
 EGRLLSKIDLANGFWSVPLKPESRARTAFSTFE-----NKQYVYNVLPQGFKNSPNAFQAIMMEILKGL-----  
 PIVVYIDDILIVTNDDEEHLKILDETLRSLTKEGFRNLNYKKMEIAKDDVEFLGFQITGNERFLSQTENKLEITTLKQ  
 LQSMGLTLNFVRDLIPGYARHAKPLYNATKGGV-LTW  
 >AciFLERV  
 QYPLNPGAVKEMDLIVRELLTLGVIRQELPITNSPIQAVKKP-GGGWRPVINFKALNRRTVANRASLINPQGTLKTLK--  
 LKPFKSCIDLANGFFSLRLTRGSQGKTAFTHK-----GRSYVWERLPQGYKNSPNVFQAAMVDVLDGL-----  
 GATIYIDVFIADDTTEEHLDRLOKIVERLTAAGLKLNLKCKQFGRKRVDYLGFGVSD-  
 DLGLSEVYRKKIEQIEPPSSLNELQKVLGLCNYVRDYVPGYQRYAKPLYAKLKKPDETA  
 >AliFLERV  
 QYPLHPEAVAEMDKIVKELHALGIREEPPLTNSPIQAVKKP-GGGWRPVINFKALNRRTVANRASLINPQGALKTLR--  
 VKKYKSCIDLANGFFSLRLARESOGKTAFTHK-----GKSYVWQRLPQGYRNSPNVFSQAVLEILEDV-----  
 GASVYIDDVFIADDTTEEHLKRLVEVVKRISAAGLKLNLAKCQFGQFKVNYLGFQVTT-  
 DLGLSDGYREKIQQIPPCENDLQKILGLCNYVRDHPVNYQKYAKPLYACLKKEATTEG  
 >EFV  
 QYRINPKAKADIQIVDDLLKQGVLKQQTSPMNTVPYPVPKP-DGRWRMVLVDYRAVNKVTPIATQNCBSASLLNTLY--  
 RGQYKTTLDLANGFWAHPIQESDQWITSFTWN-----GKSYVWTTLPQGFNLSPALFTADVVDLLKDIP-----  
 NVEVYVDDVYFSDNTEEEHLKTMDDLQKQLQTAGYIVSLKSKLQHTVDFLGFQITQGRGLTDSYKSKLLDITPPNT  
 LKQLQSILGLLNFAFNIPNYSELITPLYQLIPLAKGIYI  
 >FFV  
 QYHINPKAKPDIQIVINDLLKQGVLIQKESTMNTVPYPVPKP-NGRWRMVLVDYRAVNKVTPLIAVQNQHSYGILGSLF--  
 KGRYKTITDLSNGFWAHPVPEYDWTAFSTWQ-----GKQYCWTVLPQGFNLSPGLFTGDVVDLLQGIP-----

NVEVYVDDVYISHDSEKEHLEYLDILFNRLKEAGYIISLKKSNANSIVDFLGFQITNEGRGLTDTFKEKLENITAPPTLKQ  
 LQSILGLLNFARNFIPDFTELIAPLYALIPKSTKNYV  
 >BFV  
 QYHINPRAKADIQIVIDLLRQGVLRQQNSEMNTPVYPVPKA-DGRWRMVLVDYREVNKVTPLVATQNCHSASILNTLY-  
 -RGPYKSTLDLANGFWAHPKPEDYWITAFTWG-----GKTYCWTVLPQGFLNSPALFTADVVDILKDIP-----  
 NVQVYVDDVYVSSATEQEHLDILETIFNRLSTAGYIVSLKSKLAKETVEFLGFSISQNGRGLTDSYKQKLMIDLQPPTTL  
 RQLQSILGLINFARNFLPNFAELVAPLYQLIPKAKGQCI  
 >SFV  
 QYHINPKAKPSIQIVINDLLKQGVLRQSTSPMNTPVYPVPKP-DGKWRMVLVDYRAVNKTIPLIAAQNHSLGILTNI--  
 RHKYKSTIDLSNGFWAHPITEDSQWITAFTWE-----GKQHVWTRLPGQFLNSPALFTADVVDILKEVP-----  
 GVSVYVDDIYISSPTMEEHFQVLDSIFRKLLETGYIVSLKKSALARYEVNFLGFVISETGRGLTSEFRERLQEITPPTTLKQ  
 LQSILGFLNFARNFVFNSELVQPLYQLISTASGNFI  
 >CoEFV  
 QYPINTKAIPSIQVIVINELLEQGVLVKQTSPTNMAVLPVPKP-DGTWRLVLDYRALNKHSEPVRAQNQHSSGILANIE--  
 RKAYKSSVDLANGFWSHPREEDWPKMAFTWC-----GFQYLWTRLPGQFLNSPALFSADVISLVGQLP-----  
 GVYCYVDDIYLTHTDEEHLKILDQVLEILIKAGYVINIKKSKLCKRVVDFLGFSLSDEGRGLSDQYREKLAAIKPPQTLR  
 QLQSVMGLLNFSRLFVKGFSELAAPLYDL-----  
 >WDSV  
 QYPLPKDKTEGLRPLISSLENQGILIKCHSPCNTPIPIKAGRDEYRMIHDLRAINNVAPLTAVVASPTTVLSNLA-  
 PSLHWFTVIDLSNAFFSVPIHKDSQYLFAFTFE-----GHQYTWTVLPQGFHISPTLFSQALYQSLHKIKFKIS-  
 SEICIYMDVLIASKDRDNLKDTAVMLQHLASEGHKVSKKLQLCQEQEVVYLGQLLTPEGRKILPDRKVTVSQFQPT  
 TIRQIRAFGLGVGYCRHWIPEFSIHSKFLEKQLKDTAEPF  
 >Xen-1  
 QYPLKPAQSESINKQLQTLENGAIKRQSSPCNTPLFPVKEKGEDKYRLVQDLRAVNEATVMETPLVSNPHTILSGIP-  
 PSATHFRAVDLTNAFYSIPLREDCQYLFAFHE-----  
 RQQYVWTVLPQGAQNSPHTFSLALTSILDSWISSHPEITLLQYVDDLLLAPDLPTCEASSTDLLSFLADQGCKASKEKL  
 QWCQTTVVFLGQCISQGRHITEGRIKTLQDIPLPKGHKPLHAFLGLISYCRSWIPEASLLMQPLYDVVLKSDPFTM-  
 >SnRV  
 QYPVPDASHASIKETVEALLEQGVLRKCNSTVNSAIWVPGKP-DGSWRLTIDYRPLNSAVSCPYPYPTVASTPELFAKLE-  
 KKYQVYSSLDISNGFWSIRLEECCQYLFAFTFD-----  
 TQQYTWTRLPGGFHASPGIFHQALYNGLASCKTESQGCKLLQYVDDILLMSEDRDHHLRSLAILLQGLKDLGVKINPKK  
 SHFCKDQVQYLVGNVVGADTRSLIDARSQIRLTDIPLTVQGLRSALGLFNFRCRAWIPEFSRKTQSLYDMLKGDCKDKL  
 >HERV-L  
 QYCIP-GGIAEISATIKDLKDAGVVIPTTSPFNPIWVQKT-  
 DGSWRMTVDYHKLNVVIAAAVPPDVVSLLEQINTSPGTWYAAIDLANAFFSIPVHKAHQKQFAFSWQ-----  
 GQQYTFTVLPQGYINSPALCHNLQRDLDDLHLPQDITLVHYIDDIMLIGSSEQEVANTLDLLVRHLHARGWEINLTKI  
 QGPSTSVKFLGVLVQWCACDIVPSKVDKLLHLAPPTTKKEAQCLVGLFGFWRQHIPHLGVLLWPIYQVTQKAASFEW  
 >MuEV-L  
 QYCIP-GEIAEITATIKDLKDAGVVVPTTSPFNPIWVQKT-  
 DGSWRMTVDYRKLNVVTPIAAAVPPDVVSLLEQINTSPGTWYAAIDLANAFFSVPVHKDHQKQIAFSWQ-----  
 GQQYTFTVLPQVYINSPALCHNLVRRDLDRDL-  
 LPQSITLVHYIDDIMLVGPSEQEVATLDSLVTMIRIRGWEINPTKIQQPSTSVKFLG--  
 VQWCACRDIPSKVDKLLHLAPPTTKKEAQRLVGLFGFWRQHIPHLGVLLRPIYQVTRKAASFEW  
 >HTLV-2  
 PISFKPERLQALNDLVSKALEAGHIEPYSGPGNNPVFPVKKP-NGKWRFIHDLRATNAITTTLTSPSPGPPDLTSLPT--  
 ALPHLQITDLTDAFFQIPLPKYQPYFAFTIPQCNYGPGTRYAWTVLPQGFKNSTLFEQQLAAVLNPMRKMFPSTIV  
 QYMDDILLASPTNEELQQLSQLTLQALTTGLPISQEKTTQTPGQIRFLGQVISPNHITYESTPTI---  
 PIKSQWTLTELQVILGEIQVWSKGTPILRKHLQSLYSALHGYRDPRA  
 >BLV  
 QFPLNLERLQALQDLVHRSLEAGYISPWDGPGNNPVFPVRKP-NGTWRFVHDLRATNALTKPIPALSPGPPDLTAIPT--  
 HLPHIICLDLDAFFQIPVEDRFRSYFAFTLPTPGGLQPHRRFAWRVLPQGFINSALFERALQEPLRQVSAAFSQSLLVSY  
 MDDILIASPTEEQRSQYQALAAARLRLDGFQVASEKTRQTPSPVFLGQMVHNQIVTYQSLPTL---  
 QISSPISLHQLQAVLGDQLQVWSRGTPTTRRPLQLLYSSLKGIDDPRA

**Dataset S5.** RH alignment generated by Mafft 7.402 and used to reconstruct the phylogenetic tree in Fig. 3.

>Athila4-1  
EIMCDASDYA-----VGAVLGQKID----KKLHVIIYASRTLDD--AQGRYATTEKELLAVVFAFEKFRSYL-VG-----  
SKVTVYTDH-ALRHLYAKKD-----TKPRL--LRW----ILLL-----QEFDM-EIVDKKGI-----ENGAADHLSR---  
>Diaspora  
ELMCDASNYA-----LGAVLAQKID----KLPRVVIYASRTLDA--AQANYTTTEKELLAIVFALEKFRSYL-LG-----  
THIIVYTDHAALKYLLKKVD-----SKPRL--IRW----MLWL-----QEFDL-EIRDERSGA-----QNLVADHLSR---  
>Gmr1  
TLQTDASEVG-----LGGVLSQARN-E---REEHPVITYLSRKLLP--HERNYSTVEKEALAIKWAVNKLTYYL-LG-----  
-HQFVLVTDHAPLKWATAKD-----TNARI--TRW----FLSL-----QPFSF-TVEHRPGR-----EHTNADALSR---  
>Mdg1  
CITTDASKQA-----CGAVLSQDHN----GQQLPVAYASRSFTK--GESNKSTTEQELAAIHWAINHFRPYV-YG-----  
RHFLVQSDHRPLSYLFSMRN-----PSSKL--TRM----RLDL-----EEFEF-TVEYLKGGK-----DNHVADALFR---  
>Zam  
ILTTDASNFA-----LGAVLSQGSF----QNDRPVCFASRTLSD--TEVNYSTIEKEMLAIIWAVKYFRPYI-YG-----  
VKFTIVTDHKLPLIWLNFKE-----PNSKI--IRW----RLQL-----MEYNF-EIHKKGS-----QNVADALSR---  
>Tom  
VLTTDASNLA-----LGAVLSQ-----DNHPISFISRTLND--HELNYSSTIEKELLAIVWATKTRHYL-LG-----  
RHFQIASDHQPLRWLHNLKE-----PNAKL--QRW----RIRL-----AEFDF-HIEYIKGGK-----QNSIADALSR---  
>Gypsy  
DLTTDASASG-----IGAVLSQ-----EGRPITMISR TLKQ--PEQNYATNERELLAIVWALGKLQNFL-YG-----  
SREINIFTDHQPLTFAVADRN-----TNAKI--KRW----KSYI-----DQHNA-KVFYKPGK-----ENFVADALSR---  
>Woot  
YVQTDSSGYG-----LGAELYQIQE--D---GSRGVIAFASRSLRG--PELNYTTTEKELLGVIFALHKFRYI-QV-----  
TKIIRTDHQALKFLSRCL-----LSERL--TRW----TLIL-----GQYDY-EIELVKGGK-----GNVVADILSR---  
>Mag  
VLTVDASARG-----LGAVLAQRGP--G---CQERVVAYASRALTT--HELHYSQIHKEALAVFAVEKFHQYL-YG-----  
-RFILRTDHKPLVSIFGNIGI-----PSAAASRL--QRW----AIKL-----SAYDF-EIEYVRTD-----KN-VADALSR---  
>SPM  
VLACDASPYG-----LGVVLSHLM E--D---GEERP VAYASRTLTK--SEQNYSQIEKESLAIYGVTKFHKYL-YG-----  
RKFTLLTDHQALTIIFGSKKGI-----PSLAAARL--QRW----ALIL-----MAHQY-EIKYRKST-----EHANADVLSR---  
-  
>Cer4  
IVAADASKYG-----IGGVILHVN P--D---GVEVPIAHFARSLTE--TEKRYSQIEKEALALIYTVKSKHKFV-FG-----  
RRFKLQTDHRPLLALFGDNRDL-----PVHSQNRI--VRW----ATTL-----MSYDF-ELSYVATE-----  
KFAKADWLSR---  
>Galadriel  
EVHTDASDKA-----IGGVLVQ-----EGHPVAFESRKLND--AEQRYSTHEKEMVAVVHCLQVWRVYL-LG-----  
TRFVVRTDNVANTFFKTQKK-----LSPKQ--ARW----QEFL-----AEYDF-MWEHKPGK-----HNQVADALSR---  
--  
>CRM  
ELEC DASGIG-----LGGVLLQ-----EGKPVAYFSEKLSG--SVLNYSSTYDKELYALVRTLETWQHLYL-WP-----  
KEFVIHSDHESLKHIRSQK-----LNRRH--AKW----VEFI-----ESFPY-VIKHKKGGK-----ENIADALSR---  
>Del  
VVIYTDASLAG-----LEGVLMQ-----DGRVVAYASRQLKV--HENNYPTHLELAVVIFILKLWRHYL-YG-----  
EDFELYCDHKSLKYISTQKD-----LNLR--QRW----IEVL-----KDFDF-SIFYHPGK-----ANVVADALSR---  
>Cigr-1  
QVETDASDYA-----IAAVLSQ-----SGRPVAYMSRTLNT--CERNYPAIEKEATAVVEAVRKWSHFL-KG-----  
KSFTLVTDQRSVSFMDQRN-----KNSKI--LMW----RLEL-----SQFTY-DIVHRPGR-----DNFVPDALSR---  
>Reina  
VVETDASGSG-----IGAVLQQ-----KGHP IAYISKALGP--KNLGLSTYEKEYLAILFAVDHWRPYL-QH-----  
GEFFIKTDQQSLTHLEDQKL-----STIWQ--QKA----ITKL-----LGLQF-RIYKKGK-----ENRVADALSR---  
>Cer3  
HIFTDASAVA-----QGAVLMQOME--D--STKDYAAIAYTSRTLSD--TESRWPAIQTELGAIFALRQFRPYI-GQ-----  
SRTTIHSDHRPPMYLLGKSK-----VNDNL--ARW----LIEL-----AQYDT-RIVHIDGK-----KNTVADCLSR---  
>SURL  
KLSADASKNG-----IGAVLLQ QHD-----ENWVPIAYASRSMTD--AETRYAQIEKELLAITYACERFHQYI-YG-----  
QQVEVETDHKPLIPLFVKSL-----CPLRI--QRL----LIRV-----QRYDL-KVMYTPGK-----YMYTADTLSR---  
>Sushi-ichi

IVEVDASDAG-----IGAVLSQRSE-AD---QKIHPDAYFSRRFDP--AERNYDVGNRELLAVYGALVEWKHWL-EG-----  
--HPFLVWSDHKNLTYVRTAKR-----LNPRQ--GRW----AL-F-----SRFDF-TLTFRPGS-----KNIRADALSR---  
>Amn-san  
FIEVDASDVG-----AGAILSQRHS-AD---GKLHPCAYFSKKFSS--AEQNYDIGNRELLAVKLALEEWRLHLL-EG-----  
HPVTIYTDHKNLEFLQSLKR-----QNPRQ--ARW----SLFF-----SRFNF-VLTYRPGT-----KNRKADALSR---  
>Maggy  
ILETDASDYV-----SAGILSQYGD--D--GILRPVAFFSKKHTA--TECNYEYDKELLAIIIRCFEEWRPEL-EG-----  
SPVQIITDHRNLEYFTTTKM-----LNRRQ--ARW----AEFL-----SRFNF-RITYRPGK-----QGAKPDALTR---  
>Skippy  
ELETDASDFA-----LGGQIGQRDD--N--GVLHPIAFYSHKMHG--AELNYPIYDKEFLAIVNCFKEFRHYL-RG-----  
HPVKVFTDHNIAFYFATTQE-----LNRRQ--LRY----AEYL-----CEDF-TIAHCKGT-----DNGRADAISR---  
>TF1  
LLETDASDVA-----VGAVLSQKHD--D--DKYYPVGYYSKMSK--AQLNYSVSDKEMLAIIKSLKHWRHYL-ES-----  
--EPFKILTDHRNLGRITNES-----ENKRL--ARW----QLFL-----QDFNF-EINYRPGS-----ANHIADALSR---  
>Pyggy  
ILECDSSGYA-----TGGVLSQYDD--E--GVLRPCAYFSKKNNV--HECNYEIHDKELLAIVVRCLEEWDAEL-RS-----  
-SFKVITDHNLDVLYEAKM-----LTNVK--S-----V-----GQAAE-SIQYGAGK-----QNVRADALSR---  
>Mdg3  
ELHCDASSSG-----FGAVLMQKKE--D--QKWHPVSFSSKRTTD--IESKYHSFELETLAIVYSLRRFRVYL-HW-----  
RTFKIVTDCNSLILTLSSKE-----LNPRI--ARW----ALEF-----QGYDF-EIVHRAGS-----RMQHVDALSR---  
>Tor4a  
VLETDASDKG-----YGGVLYICES--D--NSNCLIPVCYNSGNFSP--VQQNYTIVEKELLSGKLCMEKWAIYL-AF-----  
-KKFQWITDNSNIKYVRTLRT-----NNQKI--ARW----LTDL-----QSFSF-TISQRPSS-----KMKISDFLSR---  
>Tor2  
ILLSASELA-----AGSVLMQNID----KRQRLIAVSSKTFSE--TERKWSATERECYSLIGCEKFEYYL-KG-----  
VGFIALVDHKALLALDKRYL-----ANSKL--KRW----QTRL-----AEFKF-TVQYVEGR-----SHVFADMLSR---  
>CaMV  
IIETDASDDY-----WGGMLKAIKI-NE-GTNTLICRYASGSFKA--AEKNYHSNDKETLAVINTIKKFSIYL-TP-----  
VHFLIRTDNTHFKSFVNLNYK-----GDSKL--IRW----QAWL-----SHYSF-DVEHIKGT-----DNHFADFLSR---  
>PVCV  
ILQTDASDQY-----WSAVLLEEHN-----GKRKICGFASGFKV--SEQHYHSTFKEILAVKNGIKKFNFFL-IH-----  
TNFLVEMDMRAFPKMIRLNPK-----PNSQL--LRW----AQWF-----SPYQF-EVKHLK GK-----DNILADFLSR---  
>SbCMV  
IVETDASQHS-----WSGCLRALPKKQD--THNELLCKYVSGTFTD--TETRYPIAELEVLAVGKVLKWRIDL-LQ-----  
---TRFLLRTDSKYFAGFCRYNIK-----RNGRL--IRW----QLRL-----QAYQP-YVELIKSE-----NNPFADTLTR---  
>CSVMV  
IIEVDASNNA-----YGSCLYKPK---NSKIEYLCRYNSGTFKE--NEQKYDINRKELIAVYQGLQSYSLFT-CE-----  
GNKLVRTDNSQVYYWIKNDTN-----KKSIEFRN--IKYL---LAKI-----AVYNF-EIQLIDGK-----TNIADYLSR---  
>Tor1  
IVTTDASDTG-----YGGMLSQKIG--D--DPEQPLGFTSGFFRG--PSTRWAINKEKELFAFIKTLEVFHHHT-YG-----  
RAFTWRTDSCRCLAFICAETNG-----TKRPSAKK--LRW----LEKL-----GEYDF-SISHVSGT-----EMAVPDGLSR---  
-  
>RTBV  
IIETDASEEG-----WGAVLVCKPDKYS-GKDTEKIAGYASGNFG--EKKTWTSLDYEIEAINEALNKFQIYL-----  
KDFTIRTDCIAIVKGIKTEDY-----KKRSK--TRWIKLRDNLK-----DGYKP-TFEHIKGN-----KNFLPNFLSR---  
-  
>ComYMV  
IIETDGCMTG-----WGAVCKWKMSKHD-PRSTERICAYASGSFNP----IKSTIDAEIQAAIHGLDKFKIYY-LD-----  
KELIIRSDCEAIIKFYKNTNE-----NKPSR--VRWLTFSDFLTG-----LGITV-TFEHIDGK-----HNGLADALSR---  
>Kabuki  
ALMTDASDTC-----MGAVLQKQVN-----GVWQPLGYFSRKLSP--AEQKYCTYDRELLAIYKAMIYFRKLF-EG-----  
--RPLTVYTDTPCVMHSVKYVK-----IKKRL--ARG-----SLGEFTTVLQSPGN-----PRPRASAKTI---  
>PreDIRS  
VFATDASATG-----VGAVKL-----NPKDLTELSSAYREFDE--YGGNDLEHHRELLAVQFALHHYLASK-----  
NTVVTVRTDNQNPRIKAGSGVQELN-----ELVLQVTEWCEQ-----RKVEL-MTTWIPRA-----  
MNSAADRASR---  
>CbrDIRS  
FLYTDASARG-----IGLL-----KNERQDILWKMTEIGD--NFEKQSSAWRELTAVEVASARISSNL-----  
KGRVQVLVDSQAAVSLRRGSMKPELH-----SLAERVWHNLE-----NVGES-SFLWIPRK-----  
ENVEADEAS-----  
>AliFLERV



VLFTDGSRKGPD---ETAYW---GYIL-----TQNGKEQHRARGKV-----SGSAQAGEVTAVLEGLLELTK---RK-----  
 IKAARVVTDSYYCAQALKEDLSIWIENGFESARGKTVAHK---ELWEKIAELR-----TQLDL-DVEHQKAHTKE--  
 GSYWEGNDEVDRFVQQRKI  
 >AciFLERV  
 TLFTDGSRKGPD---DTAYW---GFIL-----KLKGKEQTRQRGKA-----PGSAQAGEVTAVLEGLLELEK---RK-----  
 IKRAKIITDSYYCAQALKEDLTIWEENGYETAKGKKVAHE---DLWKKIAELR-----MNLDL-EVVHQKAHVKE--  
 GAHWRGNEEVDRFVQMRKI  
 >ZFERV-2  
 CYYTDGTTEQ----GITRW---GWIR-----KKGRKVTESDKSLE-----GLSAQAAEVKAFRKALEKAKQ---LN-----  
 DLKCFIVTDSYIYQAVEEHLGAWKNDFNTSKGKPLKQA---DDWRVIDELIT-----EITP-TVLHQTSHTSQN-  
 TTAAIGNKEVDSYVRRVRA  
 >SFV  
 VFYTDGSAIKSPKT-EQTHSAGMGIVM-VVYT-----PEPNITQQWSIPLG-----DHTAQYAEISAVEFACKKASL---L-----  
 QGPVLIVTDSYVARSANKELPFWRNGLNKKKPLKHI---SKWKNISDSLL-----LKRNI-  
 TIVHEPGHQPSKTSIHTLGNLADKLAVQGSY  
 >BFV  
 IFYTDGSAIRSPKP-NKTHSAGMGIIQ-AKFE-----PDFRIVHLWSFPLG-----DHTAQYAEIAAFEFAIRRATG---I-----  
 RGPVLIVTDSNYVAKSYNEELPYWESNGFVNNKKKTLKHI---SKWKAIAECKN-----LKADI-  
 HVIHEPGHQPAEASPHAQGNALADKQAVSGSY  
 >EFV  
 VFYTDGSSIKSPKK-DKQHSAGMGIIA-VRYQ-----PQMNIQEWISIPLG-----DHTAQFAEIAAFEFALKQAIR---K-----  
 MGPVLIVTDSYVAKSYNQELDFWVSNFVNNKKKPLKHV---SKWKSADCKK-----HKADI-  
 HVIHEPGHQNDLQSPYAMGNNAADKLAVKASY  
 >FFV  
 IFYTDGSAITSPTK-EGHLNAGMGIVYFINKD-----GNLQKQEWISISLG-----NHTAQFAEIAAFEFALKKCLP---L-----  
 GGNILVVTDSNYVAKAYNEELDVWASNGFVNNKKKPLKHI---SKWKSADCKK-----LRPDV-  
 VVTHEPGHQKLDSSPHAYGNLADQLATQASF  
 >CoEFV  
 VYYS DGSAKRNOQK---NYAGIGIVK-----THFEPEETKAVPLG-----PASAQYAEVMALLDAVKQATD-----  
 TGPVLICTDSVYAQRGYTEDLHYWAIRNFHDSRNALKYA---DKWKQLDQLKR-----DKPLV-RVIHVPGHPTPGT--  
 VHSCGNGLADSLAQGGTY  
 >Loki-Xla  
 CVYVDGCSFHTEEA-EKMLVAGIGIVW-----NNIFPEISIGYKIG-----PKSSQVAELAAVYKAIQMAIE---YD-----  
 LKEFVLITDSYVRNSFVEYFPGWKRNSNMLRSNKKPVKHG---KLFCKIDELVTT-----YGLTI-YWKKVRGHSKHP-  
 GADKDGNDLADSLAKKAAI  
 >Loki-Xtr  
 CVYVDGCSFHTEEA-EKMLVAGIGIVW-----NNIFPEISTGYKIG-----SKSSQVAELAAVYKAVQMAIE---YD-----  
 IKEFVLITDSYVRNSFVEYFPGWKRNSNMMRSNKKPVKHG---KLFCKIDELVTT-----HGLNI-YWKKVRGHSKHP-  
 GADKDGNDLADSLAKKAAI  
 >Loki-Npa  
 CVYIDGCA YHTTVGDERKL VAGIGITW-----TSEFPDVS VGYSIG-----AKSSQVAELAAVYKTVQIALE---HN-----  
 ITEFVIVTDSNYVRNSFVEYLPWKRNNMLRSNKKPVKHA---KLF GAIDELVKS-----NDLTI-YWKKTKGHSKTQ-  
 NMDKEGNDLADKLAKQGAI  
 >Loki-Rca  
 CVYVDGCA YHHKDKDQLQLVAGIGI IW-----TQGVAPISVGYKLG-----PRSSQVAELAAILKAVEMAID---YH-----  
 LKEFAIITDSNYVRNSFVEYLPWKRNNMVKSNHKPVKHG---KLFQCIDQLVRE-----HEITL-YFKKTKGHSKVL-  
 GEEKEGNDQADTLAKEGAL  
 >Loki-Sme  
 TAYVDGCSFHH---ETQVRSGAGVLW-----VHDT PCEPQCFQLG-----SQSSQYAEIAAILITLQLAKE---ND-----  
 VKNLTICTDSNYARLSFTSHLPLWIKNGFMTSNRKPVKHK---ELFIACKQLVDT-----CDMQI-YWKKVRGHSRVP-  
 GADKDLNDQADKLAKQGAI  
 >Loki-Sri  
 TAYVDGCSFHH---ETQIRAGVGVVW-----VHDTYPKPMFKLG-----SQSSQYAEIAGILITLQLAVE---KE-----  
 IKTLVICTDSNYARLSFSCHLPLWQRNGFITSNRKPVKHK---ELFVACNHLVDT-----QDMQV-YWKKVRGHSRVP-  
 GQDKELNDLDTLAKRGAV  
 >Loki-Oja  
 TAYVDGCSFRK---DKELLAGVGI AW-----LHDDPCEPKSFHLG-----SQTSQYAEIAAVLIVLQLAVS---LN-----  
 IHTLVICTDSNYARLSFSCHLDLWKQNNFQTSNRKPVKNK---ELFVACDHLITS-----HNIQI-YWKKVRGHSRIP-  
 GQDKVMNDLSDSMAKQAL  
 >Loki-Bpe

TVYVDGCSFHH---EATVRAGAGTVW-----LNNDPCEPEKFQLG-----AQTSQYAEISAVLIALNQAAA---HD-----  
 VDTFVICSDSNYARLSFSCHLPLWKSNGFLTAAKKSVKHK---ELFIACDRLVET-----KNMKV-YWKKVVRGHSREP-  
 GPDKELNDRADALAKQAL  
 >Loki-Ame  
 TVYVDGCSFRH---DQELKAGAGIVW-----LDDNPCEPQQFKLG-----SQTSQYAEIAAILITIQLAID---QG-----  
 VKTLVICSDSNYARLSFTCHLPIWKTGFLTSGRKAVKHT---ELFTAADYLVVR-----HDMLV-YWKKVVRGHSRVP-  
 GTDKTYNDQADSLAKRGAL  
 >Loki-Lro  
 TAYVDGCSYNH---EGLLKAGAGVLW-----LNDRPCPPQHFKLG-----PQSSQYAEVAAILITLQIASA---HN-----  
 IRDLICTDSNYARLSFTCHLPNWKQNGFKTANNKPVKHQ---HLFQICDDLTSK-----HDMII-YWKKVKGHSKQP-  
 GTDKDLNDQTDALAKAGAL  
 >Loki-Dcl  
 TAYVDGCSYNQ---EGKLGAGAGVLW-----LDNRPCPPQHFKLG-----PQSSQYAEIAAILITLQIAST---HN-----  
 IRELLICTDSNYARLSFMCHLPNWKQNGFKTANKKPVKHQ---QLFQACDNITRE-----HDMIV-YWKKVKGHSKQP-  
 GLDKDLNDQTDALATAGAL  
 >Loki-Tfu  
 TAYVDGCSYNH---EGNLKAGAGVLW-----M--XPCQPQHFRG-----PQSSQYAEIAAVLIALQIASA---HN-----  
 IRDLICTDSNYARLSFTCHLPSWKKNGFRTANNKQVKHK---HLFLACEDITNE-----HDMTI-YCKKVKGHSKQP-  
 GTNKDLNDQTDALAKAGAL  
 >Loki-Str  
 MAFVDGCSYRH---LDHLQAGVGLVW-----HNDIPCKPLQFQLG-----NKTSQFAEVAGVLITLQTAVK---HE-----  
 LAELAICTDSNYARLTFLCHLPFWKQKHMTTSSGKEVKNK---ELILACDDLITK-----HDIQV-YWKKVKGHSKSP-  
 GRDKLGNDHADSMASGAI  
 >Loki-Sau  
 KVYVDGCSFHH---ESQLRAGVGIVW-----DHKNDEPDHYHLG-----PKLSQYAEIAAVLIVLQQAQ---LD-----  
 VVQLVICSDSNYARHSFISHFPTWKVNDMKNARNKPVKHA---ELFQACDLLVTD-----KGIMV-YWKKVKGHSQIP-  
 GPEKDGNDADRLAKLGAE  
 >Loki-Ofa  
 RVYVDGCSFHH---ESQTRAGVGIVW-----VNHKVDEPNHYQLG-----PKTSQYAEIAAVLITLQQAQ---LA-----  
 IVQLVICSDSNYARHSFISHFPTWKENGKMKARNKEVKHS---ELFLACDQLVTD-----RGMIV-YWKKVKGHSQTA-  
 GPKDKGNDADRLAKLGAE  
 >Loki-Pyo  
 KVYVDGCSFHH---QSHLRAGVGIAW-----VDYNCSEPTHYQLG-----PKTSQYAEIAAILIALQQAQ---LA-----  
 ITQFVICSDSNYARHSFISHFPLWKEKGKMKARNKEVKHS---ELFLTCDQLVTE-----KGLIV-YWKKVKGHSQIA-  
 GPKDKGNDADRLAKLGAE  
 >Loki-Bsp  
 EVYVDGCSFRC---DSQLRAGVGIVW-----ANRQFEENHYLLG-----PKTSQYAEIAAALIAIQQAAR---QA-----  
 QSQLVICSDSNYARHSFISHFPTWKASGMKNARNKPVKHA---ELFLACDQLVTD-----KGMTV-YWRKVKGHSQTS-  
 GPDKEGNDADRLARLGAE  
 >Loki-Pfl  
 EVYVDG-SFHH---ESQTQAGVGIVW-----VKYRSEEPSHYQLG-----PKTSQYAEIAAGFIALQQAAR---QK-----  
 ISQLVICSDSNYARYSFIAHFPWKEKGMKNARNKEIKHA---KLFLACDRLVSQ-----QGMTV-YWRKVKGHSQIS-  
 GGDKEGNDADRLAKLGAS  
 >Loki-Ape  
 EVYVDGCSFHH---ESQTQAGVGIVW-----VNRYRSEEPSHYQLG-----PKTSQYAEIAAGFIALQQAAR---QK-----  
 ISQLVICSDSNYARYSFVAHFPWKEKGMKNARNKEIKHA---KLFLACDRLVSQ-----QGMTV-YWRKVKGHSQIS-  
 GGDKEGNDADRLAKLGAS  
 >Loki-Cne  
 RVYTDGCAFMH---EHQLRAGVGIVW-----TGIDSILITIQAAA---LN-----  
 QKQLVICSDSNYARLSFISHLPVWKTNGMKARNKEVKHS---NIFLACEKLTTE-----NDMTI-YWKKVKGHSRTL-  
 GQDKGNDADRLARLGAE  
 >Loki-Lch  
 KAYVDGCSFHR---EGQLQAGIGIFW-----EGNFPCTPLQYKLG-----PKSSQFSEIAAVFVAIETAVK---NK-----  
 LSDIVICTSDYARHSFCKFLPTWKANGMKNRSRGTVKHA---ELILAVDQLVLE-----NEITV-YWKKVKGHAKDS-  
 SQDKYGNLADKLAKEGAI  
 >Loki-Pma  
 MVYIDGCSKMK---ENKLHAGSGIVW-----E---TGPLTGIQEGFQLG-----PKSNQYAEIAGVHIAVQMASN---NQ-----  
 IQTMVVCTDSNYVQHSFLHLLPIWKKNGMKNHRNKPIHHQ---ELFEAIDTMVQN-----KDMKI-FWKKVKGHSKIP-  
 GQKGTGNDQADALAKVGS  
 >Loki-Lca

RYVIDGCAKMK---ENKLHAGAGIMW-----E---SGPLTGIQEGFQLG-----PKSNQYAELAGVHIALQMAAD---NK-----  
 IQTMVVCTDSDYVQYSFLNHLPIWRKNGMKNHRNRPIHHR---ELFEAIDTMIQQ-----NDMKI-FWRKVKGHSKIP-  
 GQEKAGNDRADALAKLGSL  
 >Loki-Aro  
 MYYMDGSAHRK---TGTPGAGVGLLW-----TNCDLPPQKFKLG-----PKSSQYAELAGTLIALXAAQN-----  
 YHDLVICTDSDYTVRSFLDFLPNWLANNMIKSDGKLV AHT---ELFTAVQHLLDT-----HNLTV-YWKKVPGHSKLD-  
 SPNKHGNDQADTLVKEGVS  
 >Homo\_sapiens\_RNase\_H  
 VVYTDGCCSSNGRRR---PRAGIGVYW-----GPGHPLNVGIRLPG-----RQTNQRAEIHAACKAIEQAKT---QN-----  
 INKLVLVYTDSMFTINGITNWVQGWKKNWKTSTAGKEVINK---EDFVALERLT-----QGMDI-QWMHVPGHSGFI-----  
 GNEEADRLAREGAK  
 >Caenorhabditis\_elegans\_RNase\_H  
 VVYTDGACSSNGTKN---AKAGWGVYW-----GDDSEDNEFGPVYG-----APTNNRGELIAVQKAIEKAIE---KR-----  
 LPKVVIKTDSNLLVQSMNIWIHGWRKKGWKTSTGSEVLNQ---DVLMKIDNLR-----QKLV-KFLHVRGHAGID-----  
 GNEKADELARKGAQ  
 >Trypanosoma\_brucei\_RNase\_H  
 VVYVDGACRNNGSRSEERRPRAGFGGFY-----GDGDSRNFKFPLPA-----PQTNQRAELSALIHVLRVALD---SH-----  
 CYNLCVYSDSKYTVMGVNSYLHRWERNGFKTAGGGDVANI---DLWSQFTKLRNRHLS--RCAERVAL-  
 QLKHVPGHAGVY----GNEMADRLAVEACE  
 >Candida\_orthopsilosis\_RNase\_H  
 RIYVDGASRGNGQS--KSAPSGYGVYY-----GPGDSRNAAVGLHE-----TPTNQRAELHGMKHALTNIKDDSSSTS-----  
 -SPRYDIYSDSKYAIQSINWSDKWQSNWKTSTGQPVANS---DLIKDAVQLKNEINQLYRERDVKPL-  
 EFHHVKGHSGDV----GNEAADRLANQCAD  
 >Komagataella\_phaffii\_RNase\_H  
 IYTDGATRNGKFG---AKGGYGVFF-----KENDLRNISKPLTG-----VQTNQRAELSAVRDALIIIKDLASG-----  
 KKHYTIRTDSTRYTINSITKWVTKWKQNDWRTATG-PVQNR---DLIEPTNLIESVNSKYKELGMPPL-NIEYVKGHSGDY-  
 ----GNEMADKLATAGAD  
 >Helicobacter\_pylori\_RNase\_H  
 EIFCDGSSLGNP-----GPGGYAAIL-----RYKDKEKTISG-----GENFTTNNRMELRALNEALKVLKR-----  
 PCHITLYSDSQYVCQAINVWLTNWQKKNF---SKVKNV---DLWKEFLEVS-----KGHSI-MAVWIKGHNGHA-----  
 ENERCDSLAKLEAQ  
 >Buchnera\_aphidicola\_RNase\_H  
 KIFSDGSCSLGNP-----GPGGYSFII-----QHLEYENISS-----GFYLTNNRMELMGIIVATESLKQ-----  
 PCCITSTDSQYVQKGIYWIKNWKTGWKTSRKYVKNV---DLWLRLEKSL-----NLHQV-TWKWIKSHSGNK-----  
 KNEQCDHLARESAK  
 >Shewanella\_denitrificans\_RNase\_H  
 NIYTDGSCSLGNP-----GPGGYGIVM-----QYKQHSKEIAD-----GFALTNNRMELMELLAPIIALEALME-----  
 PCIVTLTSDSQYMRQGITQWIHGWKKGWMTSNKQAVKNV---DLWKRLDSVS-----QRHNI-DWRWVKGHTGHK---  
 ---QNERCDKLARDAAE  
 >KoRV  
 AWYTDGSSFIM---DGRRQAGAAIVD-----NKRTVWASNLPE-----GTSQAQKAEIALTQALRLAE-----  
 GKSINIYTDSTRYAFATAHVHGAIIYKQRGLLTSAGKDIKKN---EILALLEAIH-----LPKRV-AIHCPCGHQRT-  
 DPVATGNRKADEAAKQAAQ  
 >MuLV  
 TWYTDGSSFLQ---EGQRKAGAAVTT-----ETEYVWAKALPA-----GTSQAQRAELIALTQALKMAE-----  
 GKCLNVYTDSTRYAFATAHIGEIYRRRGLLTSEGKEIKNK---DEILALLKALF-----LPKRL-SIHCPCGHQKGN-  
 RAEARGNRMADQAAREVAT  
 >FLV  
 TWYTDGSSFIR---NGEREAGAAVTT-----ESEVIWAAPLPP-----GTSQAQRAELIALTQALKMAE-----  
 GKCLTVYTDSTRYAFATTHVHGEIYRRRGLLTSEGKEIKNK---NEILALLEALF-----LPKRL-SIHCPCGHQKGD-  
 SPQAKGNRLADDTAKKAAT  
 >REV  
 TLFTDGSSYVR---DGKRYAGAAVVT-----LDSVIWAEPLPI-----GTSQAQKAEIALTKALEWSK-----  
 DKSVNIYTDSTRYAFATLHVHGMIIYRERGLLTAGGKAIKNA---PEILALLTAVW-----LPKRV-AVMHCKGHQKDD-  
 APTSTGNRRADEVAREVAI  
 >WDSV  
 TLFSDGSYTT-----GRGGAAVVV-----TDDFIIHQPG-----GASAQTAELLALAAACHLAT-----  
 DKTVNIYTDSTRYAYGVVHDFGHLWMHRGFVTSAGTPIKNH---KEIEYLLKQIM-----KPKQV-SVIKIEAHTKGV-  
 SMEVRGNAAADEAAKNAVF  
 >Xen-1

TLFVDGSRFSD---SGKFHTGYAVTT-----TDSVLEAQPLPA----SCSAQEAEKALTAACKLAA-----  
 GKCRANIFSDSRYAQGVALDFGTIWKTRGYLTATGSPKNG---RSVADLMEALT-----LPEQV-AVLKVKAHGRLT-  
 SPEAIGNHLADTTAKEIAV  
 >SnRV  
 KWWIDGSRWD----GGYVTGWAALE-----DKKNQLGGALEG-----HVSAQVAELVALREALRL-----  
 QRPLTLYTDSTYVLGICTKYLA VVKRRGMVNADGSQISNQ---NILQEIWQLIE-----STQTL-GIVKVKHAHTQRK-  
 STHEQQNNDVDQPAKQYAK  
 >HERV-L  
 AWFTDGSADMQ---ATTWQKWTAAL-----QPLSRTSLKDS----GESSQWAELAVHLVVLHFAWK-----  
 KWPVYLLTDSWAVANGLAGWSGTWKKHDWKIGDDKEIWGRG--GMWMDLS-----KTVKI-FVSHVSAHQSVT-  
 SAEDFNNQVDRMTHSVDT  
 >MuERV-L  
 AWFTDGSARYA---GT-TQKWTAAL-----QPLSGTTLKDT----RKSSQWAELRAVHMLVQFVCK-----  
 KWPVRLFTDSWAVANGLAGWSGTWKDHNWKIG-EKDIWGR--SMWIDISKWA-----KDVKI-FVSHVNAHQKVT-  
 SAEFEFNNQVDMKTRSVDS  
 >JSRV  
 LIFTDGSNGT-----AALII-----NHQTYAQT-----FSSAQVVELFAVHQALLTV-----  
 PTSFNLFDTSSYVVGALQMIETVP-----NLFTLIQQVL-----RQHPC-FFGHIRAHSTLP-  
 GALVQGNHTADVLTQVFF  
 >BLV  
 CLFSDGATGR-----GAYCLW-----KDHLDFQAVPA----PESAKGELAGLLAGLAAAP-----  
 PEPLNIWVDSKYLYSLLRRTLVLGA-----YALLYKSL-----RHPAI-FVGHVRSASSAS-  
 HPIASLNNYVDQLLPLETP  
 >HTLV-2  
 CLFSDGSPQK-----AAYVLW-----DQTILQQDI-----HESAKGELLALICGLRAAK-----  
 PWPLNIFLDSKYLIKYLHSLAIGA-----TLQAALPLL-----QGKTI-YLHHVRSHTNLP-  
 DPSTFNEYTDSLILAPLV  
 >SRV-1  
 LVFTDGSSTGM-----AAYTL-----ADTTIKFQTN-----LNSAQLVELQALIAVLSAFP-----  
 NQPLNIYTD S AYLAHSIPLLETVA-----KLFLQCQQLIYN-----RSIPF-YIGHVRAHSGLP-  
 GPIAHGNQKADLATKTVAS  
 >MMTV  
 VIFTDGSANGR-----VTYIQ-----GREPIIKENT-----QNTAQQAIEIVAVITAFEEV-----  
 SQPFNL Y TDSKYVTGLFPEIETAT-----TELKHLQRLHK-----RQEKF-YIGHIRGHTGLP-  
 GPLAQGNAYADSLTRILTA  
 >RSV  
 TVFTDASSSTH-----KGVVVWR-----EGPRWEIKEIADL-----GASVQQLERAVAMALLLW-----  
 TTPTNVVTDSAFVAKMLLKMGQEG-----AAAFILEDALSQ-----RSAMA-AVLHVRSHSEVP-  
 GFFTEGNDVADSQATFQAY  
 >LDV  
 TVFTDASSQTA-----MAVAVWQ-----ENGRWKKVTECSP-----GSSVQQLERAVQLASDAF-----  
 TEALNVVTDSLYVARLVSRMATPG-----LASPWLYNSLSR-----RTAPL-FICHVQAHQSLE-GLHT-  
 GNDAADRAAK-GLW  
 >HIV-1  
 TFYVDGAANRE-----KLGKAGYVT-----NRGRQKVVTLT-----DTTNQKTELQAIYLALQDS-----  
 GLEVNIVTDSQYALGIIQAQPDQS-----ELVNQIEQLI-----KKEKV-YLAWVPAHKIG-----  
 GNEQVDKLVSAGIR  
 >FIV  
 TWYIDGGRKL-----GKAACAAYW-----TDTGKWQVM-----EGSNQKAEIQALLLALKAG-----  
 SEEMNIITDSQYVINIILQPPDMM-----GIWQEVLEELE-----KKTAI-FIDWVPGHKGIP-----  
 GDGILDKRSEDAGY  
 >EIAV  
 TIYTDGGKQN-----GEGIAAYVT-----SNGRTKQKRLG-----PVTHQVAERMAIQMALEDTR-----  
 DKQVNIVTDSYCCWKNITEGLGLE-----SPWWPIIQNIR-----EKEIV-YFAWVPGHKGIY-----  
 GNQLADEAAKDAGF  
 >Lian-Aa1  
 VCYTDGSLLE-----GRAGAGVYS-----RELRLNQFSLG-----NCTVFQAEIFALMCGVQSALQ--QR-----  
 GKVIYFCSDSQAAIKALASANSRS-----KLVIA CRTQIEELN-----SVNSV-NLVWVPGHSSIA-----  
 GNELADELARDGAS  
 >TRASI

RIFTDGSKIE-----GRVGAALSIW-----DGEVEIRSLKLALA-----YCTVYQAELLALSAYVKEAQL---RN-----  
GSTFGVFSKSKAALLTVINHGSLH-----PLAVDIRKMLKQCAL-----QNKTV-ALYWIKAHAGLE-----  
GNERADQLAKEAA-  
>CATS  
-IFTDGSKIE-----GRVGAALSIW-----EGTGEIKTKKLLKLG-----YCTVYQAELLALLKATEEVLS---GG-----  
AATYNIFCDARSTLDVIASGESLH-----PLAFKITKNLKTITE-----RNQEI-RLFVWIKAHIGLE-----  
GNERADVLAKEAAL  
>You  
-IYTDGSKVT-----GATTFVVD-----SNRKIIAGGRLPS-----YNSIFTAEAFAILKACQFASK-----  
AGKSVICTDSSLASAIRNWNHND-----PTTQEVRLHILSS-----HPKKI-TLLWVPSHQGIH-----  
GNELADKAAQEMRL  
>I  
-IFTDGSKIN-----YTISFAITT-----ETDVLKYGILPP-----YSSVLTSETIAILEAIELTKN-----  
RGKFIICSDSLSAVDSIQNTNNS-----FYPSRIRSLITQ-----HAPKI-KIMWIPGHSGIK-----  
GNELADQAAKSASS  
>CgT1  
-VYSDGSKAPN-----GATGFGFVIY-----RGSRRIAQGCGRLG-----IAEVFDGEAEGARAGLRALL---TS-----  
GQPIHICIDNTSVIQGIRSNIPDSSQA-----IQAVA-----RIYNI-QTHWSPGHQGIK-----GNEEADILAKEGT  
>MGR583  
VVYTDGSEKHEN-----VQIGYGWAAF-----RAGLEFAARAASIT-----ESHVFDAAEIGALKGLQAAAK---AQ-----  
GARIWICVDSTSVIWLGRGDAPRSSQW-----LEFHNLVDLLRK-----QSTEV-RVRWCPGHQGIK-----  
GNDRADELAKAGSA  
>Pisum\_sativum\_RNase\_H  
TLMFDGAVNMNG-----NGVGAVL-----INPK-GAHMPFSARLTF-----DVTNNEAEYEACIMGIEEAID---LR-----  
IKTLDFGDSALVVNQVNGDWNTNQP-----LIPYRDYTRRILT-----FFKKV-KLYHVPRD-----  
ENQMADALATL---  
>Arabidopsis\_thaliana\_RNase\_H  
TIEFDGASKGNP-----GKAGAGAVL-----RASD-NSVLFYLRREGVG-----NATNNVAEYRALLGLRSALD---KG-----  
FKNVHVLGDSMLVCMQVQGAWKTNHPK-----MAELCKQAKELMN-----SFKTF-DIKHIARE-----  
KNSEADKQANSAL-  
>Oryza\_sativa\_RNase\_H  
-LHFDGASKGNP-----GKAGAGAVL-----MTED-GRVISRLREGLG-----IVTNNVAEYRGLILGLRYAIR---HG-----  
FKKIIVYGDSQLVCYQVKGTWQTKNQ-----MMELCKEVRKLKE-----NFVSF-EINHIRE-----  
WNAEADRQANIAI-  
>Ostreococcus\_tauri\_RNase\_H  
VLEFDGASRGNP-----GEAGAGALL-----RRKRDDRVEELLEYL-----ERTVNEAEYAALCLGLRKAIE---LG-----  
ITKIEVRGDSKLVNQVDGFSFKLSEN-----LRSMHAEAVSLK-----KFAEF-KISHVKRE-----  
FNKHADHLANMAVD  
>Haloarcula\_marismortui\_RNase\_H  
--YFDGASRGNP-----GPASVGYVL-----VNDS--GIVTEGGETIG-----TATNNQAEYKALIRAVEVARD---YG-----  
FDDVHIRGDSSELIVKQVRGEWDTNDPE-----LREHRVRVRELLT-----DFDDW-QIEHVPRE-----  
INRADELANDALD  
>Natrinema\_pellirubrum\_RNase\_H  
-VYFDGASRGNP-----GPAAIGWVI-----VTGD--GIVAEDGETIG-----TATNNQAEYEALIAGLEAARD---YG-----  
YDEVHVRGDSSELIVKQVRGEYDTNDPD-----LRENRTVHELLR-----AFDEW-TLEYVPRE-----  
VNDRADGLVNEALD  
>Halorhabdus\_utahensis\_RNase\_H  
-VYVDGASRGNP-----GPAAIGWVI-----LTGD--GGIVTEGGKRIG-----STTNNRAEYEALIALEIAAD---YG-----  
FDSVEVRSDSELAVRQVRGEWDTNDPD-----LRERRVRVRELF-----EFDDW-SIEHVPRE-----  
INERADALANE--  
>Halorubrum\_lacusprofundi\_RNase\_H  
-VYFDGASRGNP-----GPGAVGWCL-----VTAD--GIVAEGGERIG-----RVTNNQAEYAALIRALEAADE---YD-----  
FDEIDVRGDSQLIVKQVRGEWNANDPE-----LRERRVRVRELLE-----RFDRW-SIGHVPRE-----  
INERADDLANEALD  
>Mycolicibacterium\_gilvum\_RNase\_H  
IVECDGASRGNP-----GPAGYGAVV-----WSADRESVLAEARSAIG-----TATNNVAEYRGLIAGLESAAQ---TG-----  
ATEVEVRMDSKLIVEQMAGRWRVKHPD-----LAALHRQAADLAR-----RFEHI-TYSWIPRE-----  
QNSYADRLANEAMD  
>Mycobacteriaceae\_RNase\_H  
LVEADGASRGNP-----GPAGYGSVV-----WSEDRSSVLAEAQSIG-----RATNNVAEYRGLIAGLEEAAN---VG-----  
ATEVAVSMDSKLIVEQMAGRWRVKHPD-----LIPLYQRARELAE-----GFDRV-TYSWIPRA-----  
ANARADRLANEAMD

>Micromonospora\_aurantiaca\_RNase\_H  
VIEADGGSRGNP-----GPAGYGAVV-----RDPETGEVLAERSESIG-----TATNNVAEYRGLIAGLEAAAE---LG-----  
AAEVEARMDSKLVVEQMCGRWQIKHPG-----LRPLAAQAAGLVS-----RFAAV-RFTWVPRE-----  
RNRHADALANAAMD

>Ignicoccus\_hospitalis\_RNase\_H  
ELYFDGLCEPVNPG---GVATYGFVV-----KEGGKVLCSGKGLVG----DVTNNVAEY TALIKALECLLE--KG-----  
GAEVVVKGDSQLAIRQLRGEYKVRSPR-----IAPLYKRAKELLS-----KFKA--ELQWVPRE-----  
LNEEADALSREAFR

>Vulcanisaeta\_moutnovskia\_RNase\_H  
-VYFDGACEPKNPG---GVGTYGFAV-----YNDN-DTISEGYGIACE-----NCTNNVAEY TGLIKALECLLL--YG-----  
ESSIVVHGDSQLVIKQLTGIYNVRTEH-----LKPLFEKAHELLS-----HF-RV-RLEWVPRE-----  
LNSKADEL SKRAY-

>Ferroglobus\_placidus\_RNase\_H  
VLYFDGACLPVNPG---GIATYGFVI-----ITPS-GEIVKEKGIAAE-----KGTNNIAEY TALIRGLEKALE--LG-----  
IDELIVRGDSQLAIYQMNGVYAVKSPN-----IIPLWQRAMELAG-----KFRKI-RFEWVPRE-----  
QNSAADELSTQAY-

>Mars1  
VFYSYDGSKLD-----NKIGAGVYL-----RPSRAIPAESHFSLSG-----TSEVFDAELQACYACVRAKA---RN-----  
TITDCWVFLDNTSVIHRLRHTSPTAG-----

>Bel  
HGFADASSHA-----YGAVVYARVA-VG-CSFQVTLVAAKTR---VAPIKPV SIPRELELNAALLSRLLSIVK-TSLTI---  
PLFSTSCWTDSEIVLHWLSAPRRRWNTY--VCNRTSEILSDF-----PRS--CWNHVRTEDNP-----  
ADCASR----

>Tamy  
HTFVDASETA-----YAAACYWRAE---TEVIHVALIAGKAR---VSPAKPVTIPRELEQAALLGARLARTVT-EEIDL----  
QVTDRYFWSDSSTVLQWLKADPRRFKPF--VAHRLAEIKDLS-----KPH--EWRWVPTRDNP-----  
ADIATR----

>Zebel  
HIFCDASERA-----YGSVAYLRAS-DDQGHVAVTFVLARSR---VAPRKCLSMPRELELSAALTGAQLAQVIQ-NELTL-  
---PIDSVTLWSDSTTVLYWLTAESCRYKVF--VGGRVAEIQTLT-----ETA---EWRVYVDSANNP-----  
ADHITR----

>Purbel  
CIFCDASEIA-----YGACAYLRWK-TDDDKYEVRFVSAKSK---VAPLKALTIPRELELAGVLAARMHEAIS-NEMRL-  
---QVEKVVFFTD SMIVLQWIKSSARTYKAF--VSSRVGEIQTLT-----NPA---DWKHIPGEVNI-----  
ADK VSR----

>Kobel  
HAFADASEIG-----YGCVIYLRQI-NSENHCSFVFAKAR---VTPLKKITIPRELETAATLAVRLVSIVQ-RELDL----  
KIDKAIYWDSTAVLRIRNDRARYHTF--VANRVQVIREAT-----VPE---QWHHVDTKRNP-----  
ADLASR----

>Cer10-1  
IMFSDASTDI-----YATAVYVQYS-YKSRKPVTRLLTSKSK-----KNEMWTIPKLELLGIECSSNLARTII-AELGTL---  
KIKKVRFLTDRACALYWILSHKTTRV--WVANRVSQIQANQ-----CGIET-SLHHCPTKENP-----  
ADLATR----

>Koala  
SGYSADADWAGNGDD---RRSTGGFAVFL-----GNSLVSW SAR---KQPTVSRSTESEYKAMANATAEIMWIQ-  
TLLKEIHVSNSPTARLWCDNLSAKYLSSNPIFHARTK-HIEVDYHFVRERV-----QQKLL-EVGFVPTGDQI----  
-----ADGFTK----

>SIRE1-4  
VGYCDADWAGSADD---RKSTSGGCFYL-----GNNLISWFSK---KQNCVSLSTAEAEYIAAGSSCSQLVWMK-  
QMLKEYNV-EQDVM TLYCDNMSAINISKNPVQHSRTK-HIDIRHHYIRD LV-----DDKVI-TLKHVDTEEQI---  
-----ADIFTK----

>Tnt-1  
KGYTDADMAGDIDN---RKSTGYLFTF-----SGGAISWQSK---LQKCV ALSTTEAEYIAATETGKEMIWLK-  
RFLQELGL-HQKEYVVYCD SQAIDLSKNSMYHARTK-HIDVRYHWIREMV-----DDESL-KVLKISTNENP--  
-----ADMLTK----

>Vitico1-1  
VGYTDS DWAGCLED---RKNTSSYMFSL-----G-----SVWLR-  
RILADISQEHEESTIICYDNKAAIAMTKNPAYHGRTK-HVDIRVHFIRDLV-----VEGKV-VLQYCNTNEQV--  
-----ADVLT K----

>Copia

IGYVDSWAGSEID---RKSTTGylfkm-----DFNLICWNTK---RQNSVAASSTEAEYMALFEAVREALWLK-  
 FLLTSINIKLENPIKIYEDNQGCISIANNPSCHKRAK-HIDIKYHFAREQV-----QNNVI-CLEIYPTENQL-----  
 --ADIFTK----  
 >Hydra1-2  
 VAYCDADFASDLND---RRSTTGyCfSL-----NGPLISWksK---KQSTVALSTCEAEYMALTVTTQESMYLV-  
 QLLDSMNDCMYMPVQIFEDNQGAIALSKNPVCRQRCK-HVDVRYHFIRSAL-----SDGKV-  
 TVEYCPTEDMV-----ADVMTK----  
 >pCretro6  
 VGYSADADWGANPDD---QKSISGYVfLL-----GGAPVCWASR---KQKSVALSSMEAEYMAGSTAASQALWCR-  
 MLEELGFAQPNPTLLYMDNQSALALARNTGTQGRAK-HIDIRYHFLRDKI-----SSKEI-SVAHCPGEDNP--  
 -----ADIFTK----  
 >1731  
 TGFVDADWGGDRLD---RKSYTGYVfFL-----SGGPVSWRSE---KQQSVALSSTEAEYMALTTACKEAIALR-  
 RLIVEICGDLKTPTVMHGDnkCAAQLAKNPVHHSRTK-HIDIRYH--REVM-----KEGHV-VLEYTSTNEMI--  
 -----ADINTK----  
 >CoDi6.3  
 VCYSDDYAGDPDT---RRSVSGyILYV-----KGVPICWRSK---AQRSITLSSSEAEWIALSEATKEIMFVL-  
 QLLESLYIKVQLPITVRVDNIGAIWMSQNVNTSSRTK-HVDIRTKYVNEYC-----EDGVL-KIIFVKSADND---  
 -----SDIMTK----  
 >CoDi6.7  
 EVYADADFSGDPDT---ARSRTGfAIFy-----AGCPVTWQSK---LQTEISLSTTESEFVSLSTALRTALPLI-  
 GLAKEMDISVTVPVAFDDNMGAIEIALVPKMRPRTK-HINVKYHHFRQHV-----DNGDI-TIQHVDSedQI--  
 -----ADFLTK----  
 >Ty1B  
 VVISDASYGNQPY----YKSQIGNIYLL-----NGKVIGGKST---KASLTCTSTTEAEIHAISESVPLLNLS-YLIQEL---  
 DKKPITLLTDSKSTISHIISNNEEKFRNRFFGTKAMRLRDEV-----SGNHL-HVCYIETKkNI-----  
 ADVMTK----  
 >Ty4  
 IAITDASVGSEYD----AQRIGVILWY-----GMNIFNVYSN---KSTNRCVSSTEAEELHAIYEGYRDSETLK-  
 VTLKELGEGDNNDIVMITDSKPAIQGLNRSYQPKEK-FTWIKTEIIEKEL-----KRS---ITVKITGKGNi-----  
 --ADLLTN----  
 >Zeco1  
 VVFSASLGNLPD----GGTQGGTLIGL-----KFSPLCWQSK---KIRRVVRSTLAGETLALSdgIDNAIFLT-  
 TLFSELAELNTPPLICVTDNHSldALKSTKQVSEKR--LRLEISSIKDLM-----QSKKIKKVLWSDTKTQL-----  
 ----ADCLTK----

**Dataset S6.** RH alignment generated by PROMALS3D and used to reconstruct the phylogenetic tree in Fig. 3.

```
>PreDIRS
VFATDASATG-----VGAVKLNPK-----LTEL-SAYREFDEYGGNDLEHHRELLAVQFALHHYLAS-----
KNTVVTVRTDNQNIPIRL-AKGS-----ELVLQVTEW-CEQ-----RKVELMTTWIP-RA-----
MNSAADRASRETD-
>CbrDIRS
FLYTDASARG-----IGGLLKNER-----QDILWK-MTEIGDGN-FEKQSSAWRELTAVEVASARISSN-----
LKGRVQVLVDSQAAVSVL-RRGS-----LHSLAERV-WHNL-----ENVGESSFLWIP-RK-----ENVEADEAS---
--
>Mars1
VFYSDGSKLDNKIG-----AGVYLRPSR-----AIPAES-HSFSL-----GSTSEVFDAELQACYACVRAKAL-----
TITDCWVFLDNTSVIHRL-RHTSPTAGQ-----ALAIGVHEV--RTP-----LTTWE-----
>RSV
TVFTDASSSTH-----KGVVVWREG-----RWEIKE---IA---DLGASVQQLEARAVAMALLLWP-----
TPTNVVTDSAFVAKML-LKMGF-----AAAFILEDALS-----QRSAMA AVLHVR-SHSEVPG-
FFTEGNDVADSQATFQAY
>LDV
TVFTDASSQTA-----MAVAVWQEN-----RWKKVT---EC---SPGSSVQQLEARAVQLASDAFP-----
TEALNVVTDSLYVARLV-SRMAD-----LASPWLYNSLS-----RRTAPLFICHVQ-AHQSL-
GLHTGNDAADRAAKGLW-
>BLV
CLFSDGATR-----GAYCLWKDH-----L-LDFQ---AV---PAPESAQKGELAGLLAGLAAAP-----
PEPLNIWVDSKYLYSLL-RTLVLGAW-----LPDPVPSYALLYKSL-----LRHPAIFVGHVR-SHSSASH-
PIASLNNYVDQLPLETP
>HTLV-2
CLFSDGSP-----AAYVLWDQT-----LQQDIT---PL---PSHESAQKGELLALICGLRAAK-----
PWPLNIFLDSKYLIKYL-HSLAIGAF-----L TSAHQTLQAALPPL-----LQGTKIYLHHVR-SHTNLPD-
PISTFNEYTDSLILAPLV
>JSRV
LIFTDGSSNG-----TAALIINHQ-----TYYAQ-----TSFSSAQVVELFAVHQALLTV-----
PTSFNLFDTSSYVVGAL-QMIETVPI-----IEVLNLF TLIQQVLH-----CRQHPCFFGHIR-AHSTLPG-
ALVQGNHTADVLTQVFF
>SRV-1
LVFTDGSSSTG-----MAAYTLADT-----TIKFQ-----TNLNSAQLVELIAVLSAFPNQ-----
PLNIYTDSAYLAHSI-PLLETVAQ-----IETAKLFLQCQQLIY-----NRSIPFYIGHVR-AHSGLP-
PIAHGNQKADLATKTVAS
>MMTV
VIFTDGSANG-----SVTYIQGRE-----PIIKE-----NTQNTAQAEIVAVITAFEEV-----
SQPFNLYTDSKYVTGLF-PEIETAKI-----YTELK--HLQ-RLIH-----KRQEKFYIGHIR-GHTGLPG-
PLAQGNAYADSLTRILTA
>FLV
TWYTDGSSFIRNGERE-----AGAAVTTES-----EVIWAA---PL---PPGTSAQRAELIALTQALKMAE-----
GKKLTVYTDSRYAFATT-HVHG EIYRRRGLLTSSEGKEIKNKNEILAL-LEAL-----FLPKRLSIIHCP-GHQKGDS-
PQAKGNRLADDTAKKAAT
>KoRV
AWYTDGSSFIMDGRRQ-----AGAAIVDNK-----RTVWAS---NL---PEGTSAQKAELIALTQALRLAE-----
GKSINIYTDSRYAFATA-HVHGAIYKQRGLLTSAGKDIKNKEEILAL-LEAI-----HLPKRVAIIHCP-GHQRGTD-
PVATGNRKADEAAKQAAQ
>MuLV
TWYTDGSSFLQEGQRK-----AGAAVTTET-----EVLWAK---AL---PAGTSAQRAELIALTQALKMAE-----
GKKLNVYTDSRYAFATA-HIHGEIYRRRGLLTSSEGKEIKNKDEILAL-LKAL-----FLPKRLSIIHCP-GHQKGNR-
AEARGNRMADQAAREVAT
>REV
TLFTDGSSYVRDGKRY-----AGAAVVTLD-----SVIWAE---PL---PIGTSAQKAELIALTKALEWSK-----
DKSVNIYTDSRYAFATL-HVHGMIYRERGLLTAGGKAIKNAPEILAL-LTAV-----WLPKRVA VMHCK-GHQKDDA-
PTSTGNRRADEVAREVAI
>Xen-1
TLFVDGSRFSDASGKFH---TGYAVTTTD-----SVLEAQ---PL---PASCQAQAEELKALTAACKLAA-----
GKRANIFSDSRYAQGVA-LDFGTIWKTRGYLTATGSPIKNGRSVADL-MEAL-----TLPEQVAVLKVK-AHGRLTS-
PEAIGNHLADTTAKEIAV
```



>WDSV  
 TLFS DG SY TT GR GGA-----AVV VTD----DF IIIH----QQ----PGGASAQTAELLALAAACHLAT-----  
 DKTVNIYTD SRYAYGVV-HDFGHLWMHRGFVTSAGTPIKNHKEIEYL-LKQI-----MKPKQVSVIKIE-AHTKGVS-  
 MEVRGNAAADEAAKNAVF  
 >SnRV  
 KWWIDGSRVYTG-----WAALEDKKN-----QLGG---AL---EGHVSAQVAELVALREALRLQ-----  
 RPLTYLTDSTYVLGIC-TKYLA VWKRRGMVNADGSQISNQNILQEI-WQLI-----DSTQTLGIVKVK-  
 AHTQRKCSTHEQQNNDVDQPAKQYAK  
 >EIAV  
 TIYTDGGKQNGEG-----IAAYVTSNG-----RTKQ---KR---LGPVTHQVAERMAIQMALEDTR-----  
 DKQVNI VTD SY YCWKNI-TEGLGLEGPQ-----SPWWPII-QNIR-----EKEIVYFAWVP-GHKGI-----  
 YGNQLADEAAKDAGF  
 >HIV-1  
 TFYVDGAANRET KL GK-----AGYVTNRGR-----QKV---VT---LTDTTNQT ELQAIYLALQDS-----  
 GLEVNIVTDSQYALGII-QAQP-----SESEVNQII-EQLI-----KKEKVYLAWVP-AHKGI-----GGNEQ-----  
 >FIV  
 TWYIDG-GRKLGKAAK-----AAYWTD TGK-----WQV---ME---LEGSNQKAEIQALLLALKAG-----  
 SEEMNIITDSQYVINII-LQPP-----MEGIWQEV L-EEEL-----KKTAFIDWVP-GHKGI-----PGNEE-----  
 >Lian-Aa1  
 VCYTDGSLLEGRAG-----AGVYSRERL-----NQFY---SL---GRNCTVFQAEIFALMCGVQSALQQ-----  
 MGKVYIFCSDSQA AIKAL-ASANSRL-----VIACRTQ-IEEL-----NSVNSVNLVWVP-GHSSI-----  
 AGNELADELARDGAS  
 >TRASI  
 RIFTDGSKIEGRVGAA-----LSIWDGEVE----IRSLKL---AL---APYCTVYQAE L LALS YAVKEAQLR-----  
 NGSTFGVFSDSKAALLTV-INHGS-----LAVDIRKML-KQCA-----LQNKTVALYWIW-AHAGL-----  
 EGNERADQLAKEAA-  
 >CATS  
 -IFTDGSKIEGRVGAA-----LSIWEGTGE----IKTKKL---KL---GSYCTVYQAE L LALLKATEEVL SG-----  
 GAATYNIFCDARSTLDVI-ASGES-----LAFKITKNL-KTIT-----ERNQEIRLFWIK-AHIGL-----  
 EGNERADVLAKEAAL  
 >Caenorhabditis elegans RNase H  
 VVYTDGACSSNGTKNAKA--GWGVYWGDDS-----EDNEFG---PV---YGAPTNNRGELIAVQKAIEKAIEK-----  
 RLPKVVIKTDSNLLVQSM-NIWIHGWK RKGWKTSTGSEVLNQDVL MKI-DNLR-----QKLVKFLHVR-GHAGI-----  
 DGNEKADELARKGAQ  
 >Candida orthopsilosis RNase H  
 RIYVDGASRGNGQSKSAPS-GYGVYYGPGD-----SRNAAV-GLHEVDNINKYTPTNQRAELHGMKHALTNIKDD-----  
 SSPRYDIYSDSKYAIQSI-NEWSDKWQSNGWKTSTGQPVANS DLIKDA-VQLKNEINQLYRERD WKP LEFHVK-  
 GHSGD-----VGNEAADRLANQGAD  
 >Komagataella phaffii RNase H  
 IIYTDGATRNGKFGAKG--GYGVFFKEND-----LRNISK---PL---TGVQTNQRAELSAVRDALIII EK D-----  
 SKKH Y TIR TDSRYTINSI-TKWVTKWKQNDWRTAT-GPVQNRDLIEPC-TN LIESVNSKYKELGMPPLNIEYVK-GHSGD--  
 ---YGNEMADKLATAGAD  
 >MGR583  
 VVYTDGSEKHENNCVQ--IGYGWAAFRAG-----LEFAAR---AASI--TPESHVFD AEAIGALKGLQAAAKA-----  
 PGARIWICVDSTSVIWGL-RGDAPRSS-----QWAFLEFHNLV-DLLR-----KQSTEVRVRWCP-GHQGI-----  
 PGNDRADELAKAGSA  
 >Homo sapiens RNase H  
 VVYTDGCCSSNGRRRP---RAGIGVYWGG---HPLNVGI---RL---PGRQTNQRAEIIHAACKAIEQAKTQ-----  
 NINKLVLYTDSMFTINGI-TNWVQGWKKNGWKTSAGKEVINKEDFVAL-ERLT-----QGMDIQWMHVP-GHSGF-----  
 IGNEEADRLAREGAK  
 >CgT1  
 -VYSDGSKAPNGATG-----FGFVIYRGS-----RIAQGC---GR---LGIAEVFDGEAEGARAGLRRALLT-----  
 QGQPIHICIDNTSVIQGI-RSNIPDS-----SQA AFLE-IQAV-----ARIYNIQTHWSP-GHQGI-----  
 KGNEEADILAKEGTT  
 >You  
 -IYTDGSKVTGATT-----FAVVDSNKI-----IAGG---RL---PSYNSIFTAEAFAILKACQFASKN-----  
 AGKSVICTDSSL SLSAI-RNWNHND-----PTTQEV R-HILS-----SHPKKITLLWVP-SHQGI-----  
 HGNELADKAAQEMRL  
 >I  
 -IFTDGSKINYTIS-----FAIT TETVL-----KYG---IL---PPYSSVLTSETIAILEAIELTKNR-----  
 RGKFIICSDSLSAVDSI-QNTNNNS-----FYPSRIR-SLIT-----QHAPKIKIMWIP-GHSGI-----  
 KGNELADQAAKSASS

>Ostreococcus\_tauri\_RNase\_H  
 VLEFDGASRGNGPGEAG----AGALLRRKR----DRVVEE-LLEYL----GSERTVNEAEY AALCLGLRKAIEL-----  
 GITKIEVRGDSKLIVNQV-DGSFKLKS-----ENLRSMHAEA-VSLK-----KKFAEFKISHVK-RE-----  
 FNKHADHLANMAVD  
 >Helicobacter\_pylori\_RNase\_H  
 EIFCDGSSSLGNPGPGG----YAAILRYKD----KEKTIS-GGE-----NFTTNNRMELRALNEALKVLKR-----  
 PCHITLYSDSQYVCQAI-NVWLTNWQKKNFS----KVKNVDLWKEF-LEVS-----KGHSIMAVWIK-GHNGH-----  
 AENERCDSLAKLEAQ  
 >Buchnera\_aphidicola\_RNase\_H  
 KIFSDGSCSLGNPGPGG----YSFIIQHLE----YENISS-SGF-----YLTTNNRMELMGIIVATESLKQ-----  
 PCCITISTDSQYVQKGI-LYWIKNWTKGWKTSRKTYVKNVDLWLRL-EKSL-----NLHQVTWKWIK-SHSGN-----  
 KKNEQCDHLARESAK  
 >Shewanella\_denitrificans\_RNase\_H  
 NIYTDGSCSLGNPGPGG----YGIVM QYKQ----HSKEIA-DGF-----ALTTNNRMELMELAPIIALEALME-----  
 PCIVTLTSDSQYMRQGI-TQWIHG WKKKGWMTSNKQAVKNVDLWKRL-DSVS-----QRHNIDWRWVK-GHTGH-----  
 KQNERCDKLARDAAE  
 >Arabidopsis\_thaliana\_RNase\_H  
 TIEFDGASKGNPGKAG----AGAVLRASD----NSVLFY--LREG---VGNATNNVAEYRALLGLRSALDK-----  
 GFKNVHVLGDSMLVCMQV-QGAWKTNH-----PKMAELCKQA-KELM-----NSFKTFDIKHIA-RE-----  
 KNSEADKQANSAL-  
 >Oryza\_sativa\_RNase\_H  
 -LHFDGASKGNPGKAG----AGAVLMTED----GRVISR--LREG---LGIVTNNVAEYRGLILGLRYAIRH-----  
 GFKKIIVYGDSQLVCYQV-KGTWQTKN-----QNMELCKEV-RKLLK-----ENFVSFEINHIR-RE-----  
 WNAEADRQANIAL-  
 >Haloarcula\_marismortui\_RNase\_H  
 --YFDGASRGNGPGAS----VG YVLVND S----GIVTEG---GET---IGTATNNQAEYKALIRAVEVARDY-----  
 GFDDVHIRGDSSELIVKQV-RGEWDTND-----PELREHRVRV-RELL-----TDFDDWQIEHVP-RE-----  
 INDRADELANDALD  
 >Halorhabdus\_utahensis\_RNase\_H  
 -VYVDGASRGNGPAA----IGWVILTGD----GIVTEG---GKR---IGSTTNNRAEY EALIHAEIAADY-----  
 GFDSVEVRSDSELAVRQV-RGEWDTND-----PDLRERRVRV-RELF-----REFDDWSIEHVP-RE-----  
 INERADALANEA--  
 >Natriema\_pellirubrum\_RNase\_H  
 -VYFDGGSRGNGPAA----IGWVIVTGD----GIVAED---GET---IGTATNNQAEY EALIAGLEAARDY-----  
 GYDEVHVRGDSSELIVKQV-RGEYDTND-----PDLRENVRTV-HELL-----RAFDEWTLEYVP-RE-----  
 VNDRADGLVNEALD  
 >Halorubrum\_lacusprofundi\_RNase\_H  
 -VYFDGASRGNGPGA----VGWCLVTAD----GIVAEG---GER---IGRVTNNQAEY AALIRALEAADEY-----  
 DFDEIDVRGDSQLIVKQV-RGEWNAND-----PELREHRVRV-RELL-----ERFDRWSIGHVP-RE-----  
 INERADDLANEALD  
 >Mycolicibacterium\_gilvum\_RNase\_H  
 IVECDGGSRGNGPGAG----YGAVVWSAD----RESVLA-EARSA---IGTATNNVAEYRGLIAGLESAAQT-----  
 GATEVEVRMDSKLIVEQM-AGRWRVKH-----PDLAALHRQA-ADLA-----RRFEHITYSWIP-RE-----  
 QNSYADRLANEAMD  
 >Mycobacteriaceae\_RNase\_H  
 LVEADGGSRGNGPGAG----YGSVVWSED----RSSVLA-EAKQS---IGRATNNVAEYRGLIAGLEEAANV-----  
 GATEVAVSMDSKLIVEQM-AGRWRVKH-----PDLIPLYQRA-RELA-----EGFDRVTYSWIP-RA-----  
 ANARADRLANEAMD  
 >Micromonospora\_aurantiaca\_RNase\_H  
 VIEADGGSRGNGPGAG----YGAVVRDPE----TGEVLA-ERSES---IGTATNNVAEYRGLIAGLEAAAEL-----  
 GAAEVEARMDSKLIVEQM-CGRWQIKH-----PGLRPLAAQA-AGLV-----SRFAAVRFTWVP-RE-----  
 RNRHADALANAAMD  
 >Vulcanisaeta\_moutnovskia\_RNase\_H  
 -VYFDGACEPKNPGGVG---TYGFVYND-----NDTISE---GY---GINCTNNVAEYTGLIKALECLLLH-----  
 DYGSIVVHGDSQLVIKQL-TGIYNVRT-----EHLKPLFEKA-HELL-----SHFRVRLEWIP-RE-----  
 LNSKADEL SKRAY-  
 >Ignicoccus\_hospitalis\_RNase\_H  
 ELYFDGLCEPVNPGGVA---TYGFVVKEG----GKVLCS---GK---GLDVTNNVAEY TALIKALECCLLEK-----  
 GLEEVVVKGDSQLAIRQL-RGEYK VRS-----PRIAPLYKRA-KELL-----SKFKAELQWVP-RE-----  
 LNEEADALSREAFR  
 >Ferroglobus\_placidus\_RNase\_H

VLYFDGACLPVNPGGIA---TYGFVIITP----SGEIVK---EK---GIKGTNNIAEYTAIRGLEKALEL-----  
 GIDELIVRGDSQLAIYQM-NGVYAVKS-----PNIIPWLQRA-MELF-----RKIRFEWVP-RE-----  
 QNSAADELSTQAY-  
 >Bel  
 HGFADASSHA-----YGAVVYARVAV-GCSFQVTL-VAAKTRVAPIKVSIPRLELNAALLSRLLSIVKTS---  
 LTIPLFSTSCWTDSEIVLHWL-SAPPRRW-----NTYVCNRTSEIL-----SDFPRSCWNHVR-TE-----DN-  
 PADCASR----  
 >Tamy  
 HTFVDASETA-----YAAACYWRAET--EVIHVAL-IAGKARVSPAKPVTIPRLELQAALLGARLARTVTEE---  
 IDLQVTDRYFWSDSSTVLQWL-KADPRRF-----KPFVAHRLAEIK-----DLSKPHEWRWVP-TR-----DN-  
 PADIATR----  
 >Zebel  
 HIFCDASERA-----YGSVAYLRASD-DQGHVAVTVFLARSRVAPRKCLSMRLELSAALTGAQLAQVIQNE---  
 LTLPIDSVTLWSDSTTVLYWL-TAESCRY-----KVFVGGRVAEIQ-----TLTETAEWRYVD-SA-----NN-  
 PADHITR----  
 >Purbel  
 CIFCDASEIA-----YGACAYLRWKT-DDDKYEVRFVSAKSKVAPLKALTIPLRELLAGVLAARMHEAISNE---  
 MRLQVEKVVFFTDMSMIVLQWI-KSSARTY-----KAFVSSRVGEIQ-----TLTNPADWKHIP-GE-----VN-  
 IADKVSER----  
 >Kobel  
 HAFADASEIG-----YGCVIYLRQIN-SSENIHCSFVFAKARVTPKKITIPRLELTAATLAVRLVSIVQRE---  
 LDFKIDKAIYWDSTAVLRYI-RNDRARY-----HTFVANRVQVIR-----EATVPEQWHHVD-TK-----RN-  
 PADLASR----  
 >Cer10-1  
 IMFSDASTDI-----YATAVYVQYSY-KSRKPVTRLLTSKSKIRSAKMWTIPKLELLGIECSSNLARTIAT---  
 LATKIKKVRFLTDRACALYWI-LSHKTTR-----VSQIQANQKILE-----ECGIETSLHHCP-TK-----EN-  
 PADLATR----  
 >Tor1  
 IVTTDASDTGY-----GGMLSQKIGD--DPEQPLG-FTSGFFRGPSTRWAINKEKELFAFIKTLEVFHHHT-----  
 YGRAFTWRTDSCRCLAFIC-AETNGK-----PSAKKLRW-LEKL-----GEYDFSISHVS-G-----TEMAVPDGLSR-  
 ---  
 >HERV-L  
 AWFTDGSADMQATTTKWQK-WTAAALQPLSR---TSLKDS---GE---DSGESSQWAEALAVHLVVLHFAWKE-----  
 KWPVYLLTDSWAVANGL-AGWSGTWKKHDWKIGDDKEIWGRGMVGMW-MDLS-----KTVKIFVSHVS-  
 AHQSVTS-AEEDFNNQVDRMTHSVDT  
 >MuERV-L  
 AWFTDGSARYAGTT-QKW---TAAALQPLSG---TTLKDT-----GERKSSQWAEALRAVHMVLQFVCKK-----  
 KWPVRLFTDSWAVANGL-AGWSGTWKDHNWKIG-EKDIWGR---SMW-IDIS-----AKDVKIFVSHVN-AHQKVT-  
 AEEEFNNQVDMTRSVDS  
 >Loki-Npa  
 CVYIDGCAYHTTVGDERKL-VAGIGITWSE---FPDVSVG---YS---IGAKSSQVAELA AVYKTVQIALEH-----  
 NITEFVIVTDSNYVRNSF-VEYLPTWKRNNMLRSNKPVKHAKLFGAI-DELV-----KSNDLTIYWKKTK-GHSKTQN-  
 MDKEGNDLADKLAQGAI  
 >Loki-Xla  
 CVYVDGCSFHTEEAEMKML--VAGIGIVWNNI--FPEISIG---YK---IGPKSSQVAELA AVYKAIQMAIEY-----  
 DLKEFVLITDSYVRNSF-VEYFPGWKRNSNMLRSNKKPVKHGKLFCKI-DELV-----TTYGLTIYWKKVR-GHSKHPG-  
 ADKDGNDLADSLAKKAAI  
 >Loki-Xtr  
 CVYVDGCSFHTEEAEMKML--VAGIGIVWNNI--FPEISTG---YK---IGSKSSQVAELA AVYKAVQMAIEY-----  
 DIKEFVLITDSYVRNSF-VEYFPGWKRNSNMLRSNKKPVKHGKLFCKI-DELV-----TTHGLNIYWKKVR-GHSKHPG-  
 ADKDGNDLADSLAKKAAM  
 >Loki-Rca  
 CVYVDGCA YHHKDKDQLQL-VAGIGIWTQG---VAPISVG---YK---LGPRSSQVAELAAILKAVEMAIDY-----  
 HLKEFAIITDSNYVRNSF-VEYLPWRKRNNMVKSNHKPVKHGKLFQCI-DQLV-----REHEITLYFKKTK-GHSKVLG-  
 EEKEGNDQADTLAKEGAL  
 >Loki-Ofa  
 RYVVDGCSFHESQTR-----AGVGIVWVNH---KVDEPNH---YQ---LGPKTSQYAEIAAVLITLQQAACL-----  
 AIVQLVICSDSNYARHSF-ISHPVWKENGKMNARNKEVKHSEFLAC-DQLV-----TDRGMTVYWKVK-GHSQTAG-  
 PDKDGNDLADSLAKLGAEL  
 >Loki-Sme

TAYVDGCSFHETQVR----SGAGVLWVHD---TPCEPQC----FQ----LGSQSSQYAEIAAILITLQLAKEN-----  
DVKNLTICTDSNYARLSF-TSHLPLWIKNGFMTSNRKPVKHKELFIAC-KQLV-----DTCDMQIYWKKVR-GHSRVPG-  
ADKDLNDQADKLAKQGA  
>Loki-Sri  
TAYVDGCSFHETQIR----AGVGVVWVHD---TPYKPM----FK----LGSQSSQYAEIAGILITLQLAVEK-----  
EIKTLVICTDSNYARLSF-SCHLPLWQRNGFITSNRKPVKHKELFVAC-NHLV-----DTQDMQVYWKKVR-GHSRVPG-  
QDKELNDLTDLAKRGAV  
>Loki-Oja  
TAYVDGCSFRKDKELL----AGVGIAWLHD---DPCEPKS----FH----LGSQTSQYAEIAAVLIVLQLAVSL-----  
NIHTLVICTDSNYARLSF-SCHLDLWKQNNFQTSNRKPVKNKELFVAC-DHLI-----TSHNIQIYWKKVR-GHSRIPG-  
QDKVMNDLSDSMAKQGA  
>Loki-Bpe  
TVYVDGCSFHHEATVR----AGAGTVWLNN---DPCEPEK----FQ----LGAQTSQYAEISAVLIALNQAAAH-----  
DVDTFVICTDSNYARLSF-SCHLPLWKSNGFLTAAKKSVKHKELFIAC-DRLV-----ETKNMKVYWKKVR-GHSREPG-  
PDKELNDRADALAKQGA  
>Loki-Ame  
TVYVDGCSFRHDQEGK----AGAGIVWLDD---NPCEPQ----FK----LGSQTSQYAEIAAILITIQLAIDQ-----  
GVKTLVICTDSNYARLSF-TCHLPIWTKGFLTSGRKA VKHTELFATA-DYLV-----VRHDMLVYWKKVR-GHSRVPG-  
TDKTYNDQADSLAKRGAL  
>Loki-Lro  
TAYVDGCSYNHEGLLK----AGAGVLWLDN---RPCPPQH----FK----LGPQSSQYAEVAAILITLQIASAH-----  
NIRDLLICTDSNYARLSF-TCHLPNWKQNGFKTANNKPVKHQHLFQIC-DDLT-----SKHDMIIYWKKVK-GHSHKQPG-  
TDKDLNDQTDALAKAGAL  
>Loki-Dcl  
TAYVDGCSYNQEGK----AGAGVLWLDN---RPCPPQH----FK----LGPQSSQYAEIAAILITLQIASTH-----  
NIRELLICTDSNYARLSF-MCHLPNWKQNGFKTANKKPVKHQQLFQAC-DNIT-----REHDIMVYWKKVK-GHSHKQPG-  
LDKDLNDQTDALATAGAL  
>Loki-Tfu  
TAYVDGCSYNHEGNLK----AGAGVLWM----XPCQPQH----FR----LGPQSSQYAEIAAVLIALQIASAH-----  
NIRDLLICTDSNYARLSF-TCHLPSWKKNGFRTANNKQVKKHKLFLAC-EDIT-----NEHDMTIYCKKVK-GHSHKQPG-  
TNKDLNDQTDALAKAGAL  
>Loki-Str  
MAFVDGCSYRHLHLQ----AGVGLVWHND---IPCKPLQ----FQ----LGNKTSQFAEVAGVLITLQTAVKH-----  
ELAELAICTDSNYARLTF-LCHLPFWKQKHMTTSSGKEVKNKELILAC-DDLI-----TKHDIQVYWKKVK-GHSHKSPG-  
RDKLGNHDHADSMAKSGAI  
>Loki-Sau  
KVYVDGCSFHESQLR----AGVGVVWDH---KNDEPDH---YH----LGPKLSQYAEIAAVLIVLQQAAL-----  
DVVQLVICSDSNYARHSF-ISHFPTWKVNDMKNARNKPVKHAELFQAC-DLLV-----TDKGIMVYWKKVK-GHSQIPG-  
PEKDGNDLADRLAKLGAE  
>Loki-Pyo  
KVYVDGCSFHHSQSLR----AGVGVVWDH---KNDEPDH---YH----LGPKLSQYAEIAAVLIVLQQAAL-----  
AITQVICSDSNYARHSF-ISHFPLWKEKGMKNARNKEVKHSELFLTC-DQLV-----TEKGLIVYWKKVK-GHSQIAG-  
PDKDGNDLADRLAKLGAE  
>Loki-Bsp  
EVYVDGCSFRCDSQLR----AGVGIVWANR---QFEPPH---YL----LGPKTSQYAEIAAALIAIQAARQ-----  
AQSQVICSDSNYARHSF-ISHFPTWKASGMKNARNKPVKHAELFLAC-DQLV-----TDKGMTVYWRKVK-GHSQTSG-  
PDKEGNDLADRLARLGAE  
>Loki-Ape  
EVYVDGCSFHESQTQ----AGVGIYVWNY---RSEEPSH---YQ----LGPKTSQYAEIAAGFIALQQAARQ-----  
KISQVICSDSNYARYSF-VAHFPAWKEKGMKNARNKEIKHAKLFLAC-DRLV-----SQQGMTVYWRKVK-GHSQISG-  
GDKEGNDLADRLAKLGAS  
>Loki-Pfl  
EVYVDG-SFHESQTQ----AGVGIYVWNY---RSEEPSH---YQ----LGPKTSQYAEIAAGFIALQQAARQ-----  
KISQVICSDSNYARYSF-IAHFPAWKEKGMKNARNKEIKHAKLFLAC-DRLV-----SQQGMTVYWRKVK-GHSQISG-  
GDKEGNDLADRLAKLGAS  
>Loki-Cne  
RVYTDGCAFMHEHQLR----AGVGIVWTG-----IDSILITIQQAAL-----  
NQKQLVICSDSNYARLSF-ISHLVWKTNGMKNARNKEVKHSNIFLAC-EKLT-----TENDMTIYWKKVK-GHSRTL-  
QDKDGNDLADRLARLGAE  
>Loki-Lch

KAYVDGCSFHREGQLQ----AGIGIFWEGN---FPCTPLQ----YK----LGPKSSQFSEIAAVFVAIETAVKN-----  
 KLSDIVICTDSYARHSF-CKFLPTWKANGMKNRSGKTVKHAELILAV-DQLV-----LENEITVYWKVKV-GHAKDSS-  
 QDKYGNLADKLAKEGAI  
 >Loki-Pma  
 MVYIDGCSKMKENKLNH---AGSGIVWETGPL---TGIQEGF-----Q----LGPKSNQYAELAGVHIAVQMASNN-----  
 QIQTMVVCTDSNYVQHSF-LHHLPIWKKNGMKNHRNKPIHHQELFEAI-DTMV-----QNKDMKIFWKKVK-GHSKIPG-  
 QEKTGNDQADALAKVGS  
 >Loki-Lca  
 RVIYIDGCAKMKENKLNH---AGAGIMWESGPL---TGIQEGF-----Q----LGPKSNQYAELAGVHIALQMAADN-----  
 KIQTMVVCTDSYVQYSF-LNHLPIWRKNGMKNHRNRPIHHRELFEAI-DTMI-----QQNDMKIFWRKVK-GHSKIPG-  
 QEKAGNDRADALAKLGS  
 >Loki-Aro  
 MVYMDGSAHRKTGTP----GAGVGLLWTNC---DLPPQKF-----K----LGPKSSQYAELAGTLIALXAAQNN-----  
 YHDLVICTDSYTVRSF-LDFLPNWLANNMIKSDGKLVAAHTELFATV-QHLL-----DTHNLTVYWKVKVP-GHKLDS-  
 PNKHGNDQADTLVKEGVS  
 >AliFLERV  
 VLFTDGSRKGPDE----TAYWGYILTQNGK----EQHRA-RGK-----VSGSAQAGEVTAVLEGLLELTKR-----  
 KIKAAARVVTDSYCAQAL-KEDLSIWIENGFESARGKTVAHKELWEKIAELRT-----QLDLDEVEHQK-AHTKEG--  
 SYWEGNDEVDRFVQ---  
 >AciFLERV  
 TLFTDGSRKGPDD----TAYWGFILKLGK-----EQTRQ-RGK-----APGSAQAGEVTAVLEGLLELEKR-----  
 KIKRAKIITDSYCAQAL-KEDLTIWEEENGYETAKGKVAHEDLWKKIAELRM-----NLDLEVVHQK-AHVKEG--  
 AHWRGNEEVDRFVQ---  
 >ZFERV-2  
 CYYTDGTTTEQGIT----RWGWGWIRKKGRK---VTESDKG-SLE-----AGLSAQAAEVKAFRKALEKAKQL-----  
 NDLKCFIVTDSYIYQAV-EEHLGAWKNDFNTSKGKPLKQADDWRVI-DELI-----TEITPTVLHQT-SHTSQNT-  
 TAAIGNKEVDSYVRRVRA  
 >CoEFV  
 VVYSDGSAKRNOQ----KNYAGIGIVKGF---HFEPEET-KAVP----LGPASAQYAEVMALLDAVKQATD-----  
 TGPVLICTDSVYAQRGY-TEDLHYWAIRNFHDSRNAKLYADKWKQL-DQLK-----RDKPLVRVIHVP-GHTPGT--  
 VHSCGNGLADSLAQGGTY  
 >EFV  
 VFYTDGSSIKSPKDKQHSAGMGIIAVRYQP---QMNIQE-WSIP----LGDHTAQFAEIAAFEFALKQAIRK-----  
 MGPVLIVTDSYVAKSY-NQELDFWVSNVNGFVNNKKKPLKHVSKWKS-ADCK-----KHKADIHVIHEP-  
 GHQNDLQSPYAMGNNAADKLAVKASY  
 >SFV  
 VFYTDGSAIKSPKTEQTHSAGMGIVMVVYTP---EPNITQQ-WSIP----LGDHTAQYAEISAVEFACKKASLL-----  
 QGPVLIVTDSYVARSA-NKELPFWRSNGFLNKKKPLKHISKWKNI-SDSL-----LLKRNITIVHEP-  
 GHQPSKTSIHTLGNSLADKLAVQGSY  
 >BFV  
 IFYTDGSAIRSPKPNKTHSAGMGIIQAKFEP---DFRIVHL-WSFP----LGDHTAQYAEIAAFEFAIRRATGI-----  
 RGPVLIVTDSNYVAKSY-NEELPYWESNGFVNNKKKTLKHISKWKAI-AECK-----NLKADIHVIHEP-  
 GHQPAEASPHAQGNALADKQAVSGSY  
 >FFV  
 IFYTDGSAITSPTKEGHLNAGMGIVYFINKDG--NLQKQOE-WSIS----LGNHTAQFAEIAAFEFALKKCLPL-----  
 GGNILVVTDSNYVAKAY-NEELDVWASNGFVNNRKKPLKHISKWKS-ADLK-----RLRPDVVVTHEP-  
 GHQKLDSSPHAYGNLADQLATQASF  
 >Trypanosoma\_brucei\_RNase\_H  
 VVYVDGACRNNRSRERER-GFGGFYGDGDS---RNFKFPL----PA----HEPQTNQRAELSALIHVLRVALDS-----  
 PCYNLCVYSKTYVMGV-NSYLHRWERNGFKTAGGGDVANIDLWSQF-TKLR-----AERVALQLKHVP-GHAGV----  
 --YGNEMADRLAVEACE  
 >Pisum\_sativum\_RNase\_H  
 TLMFDGAVNG-----VGAVLINPKG-----AHMP-FSARLTF---DVTNNEAEYEACIMGIEEIDL-----  
 RIKTLDIFGDSALVVNQV-NGDWNTL-----IPYRDYR-RRIL-----TFFKKVKLYHVP-RD-----  
 ENQMADALATL---  
 >Cer3  
 HIFTDASAVA-----QGAVLMQMED-STKDYAAIAYTSRTLSDTESRWPAIQTELGAIFALRQFRPYI-----  
 GQSRTHSDHRPPMYLL-GKSKV-----NDNLARW-LIEL-----AQYDTRIVHID-GK-----KNTVADCLSR---  
 -  
 >Tor2

ILLSDASELA-----AGSVLMQNIDK--RQRLIA-VSSKTFSETERKWSATERECYSLIGCEKFEYYL-----  
 KGPVGFIALVDHKALLALD-KRYLA-----NSKLRW-QTRL-----AEFKFTVQYVE-GR-----  
 SHVFADMLSR----  
 >Ty1B  
 VVISDASYGNQPYI-KSQ--IGNIYLLNGK-----VIG-GKSTKAS--LTCTSTTEAEIHAISESVPLLNLSYI---  
 QELDKKPITLLTDSKSTISII-ISNNEEFRN-----RFFGTKAMRL-RDEV-----SGNHHLHVCYIE-TK-----KN-  
 IADVMTK----  
 >Ty4  
 IAITDASVGEYDA-QSR--IGVILWYGMN-----IFN-VYSNKST--NRCVSSTEAELHAIYEGYRDSETLKVL---  
 GEGDNDIVMITDSKPAIQGL-NRSYQQPKE-----KFTWIKTEII-KEKL-----KRSITVKIT-GK-----GN-  
 IADLLTN----  
 >CSVMV  
 IIEVDASNNA-----YGSCLKYKPKN--KIEYLCR-YNSGTFKENEQKYDINRKELIAVYQGLQSYSLFT-----  
 CEGNKLVRTDNSQVYYWI-KNDTNK-----IEFRNIKYL-LAKI-----AVYNFEIQLID-GK-----TNIADYLSR---  
 >SbCMV  
 IVETDASQHS-----WSGCLRALPKG--NELLLCK-YVSGTFTDTETRYPIAELEVLAVGK VLEK WRIDL-----  
 LQTRFLLRTDSKYFAGFC-RYNIKT-----YRNGRLIRW-QLRL-----QAYQPYVELIK-SE-----NNPFADTLTR--  
 --  
 >CaMV  
 IIETDASDDY-----WGGMLKAIKIN--NTELICR-YASGSFKAEEKNYHSNDKETLAVINTIKKFSIYL-----  
 TPVHFLIRTDNTHFKSFV-NLNYKG-----SKLGRNIRW-QAWL-----SHYSFDVEHIK-GT-----DNHFADFLSR-  
 ---  
 >PVCV  
 ILQTDASDQY-----WSAVLLEEHN--GKRKICG-FASGKFKVSEQHYHSTFKEILAVKNGIKKFNFFL-----  
 IHTNFLVEMDMRAFPKMI-RLNPKI-----VPNSQLLRW-AQWF-----SPYQFEVKHLK-GK-----  
 DNILADFLSR----  
 >Kabuki  
 ALMTDASD-----MGAVLQQKV---VWQPLG-YFSRKLSPAEQKYCTYDRELLAIYKAMIYFRKL-----  
 EGRPLTVYTDTPCVMHS-VKYVI-----KKRLDARGICFS-----LGEFTTVLQSPGN-----  
 >Tor4a  
 VLETDASDKG-----YGGVLYICESD--NCLIPVC-YNSGNFSPVQQNYTIVEKELLSGKLCMEKWAIYL-----  
 AFKKFQWITDNSNIKYVR-TLR-----TNNQKIARW-LTDL-----QSFSFTISQRP-SS-----KMKISDFLSR---  
 >RTBV  
 IIETDASEEG-----WGAVLVCKPKD--KDTEKIA-GYASGNFGEKKTWTSLDYEIEAINEALNKFQIYL-----  
 DKDFTIRTDCEAIVKGI-KTED-----YKKRSKTRW-IKLG-----DGYKPTFEHIK-GN-----KNFLPNFLSR---  
 >ComYMV  
 IIETDGCMTG-----WGAVCKWKMSKHRSTERICA-YASGSFNPIK--STIDAEIQAAIHGLDKFKIYY-----  
 LDKKELIIRSDCEAIKIFY-NKTN-----ENVRWLTf-SDFL-----TGLGITVTFEHID-GK-----HNGLADALS---  
 -  
 >Skippy  
 ELETDASDFA-----LGGQIGQRDDN--GVLHPIA-FYSHKMHGAELNYPYDKEFLAIVNCFKEFRHYL-----  
 RGSKHPVKVFTDHNIAFYA-TTQE-----LNRRQLRY-AEYL-----CEFDFTIAHCK-GT-----  
 DNGRADAISR----  
 >Amn-san  
 FIEVDASDVG-----AGAILSQRHSA--GKLHPCA-YFSKKFSSAEQNYDIGNRELLAVKLALAEWRHLL-----  
 EGASHPVTIYTDHKNLEFLQ-SLKR-----QNPRQARW-SLFF-----SRFNFLTYRP-GT-----  
 KNRKADALS---  
 >Sushi-ichi  
 IVEVDASDAG-----IGAVLSQRSEA--QKIHPCA-YFSRRFPAERNYDVGNRELLAVYGALVEWKHWL-----  
 EGAKHPFLVWSDHKNLTYVR-TAKR-----LNPRQGRW--ALF-----SRFDFTLTFRP-GS-----  
 KNIRADALS---  
 >TF1  
 LLETDASDVA-----VGAVLSQKHDD--DKYYPVG-YYSKMSKAQLNYSVSDKEMLAIKSLKHWRHYL-----  
 ESTIEPFKILTDHRNLIGRITNESE-----ENKRLARW-QLFL-----QDFNFEINYRP-GS-----ANHIADALS---  
 >Maggy  
 ILETDASDYV-----SAGILSQYGDD--GILRPVA-FFSKKHTATECNYEYDKELLAIIRCFFEEWRPEL-----  
 EGTSSPVQIITDHRNLEYFT-TTKM-----LNRRQARW-AEFL-----SRFNFRITYRP-GK-----QGAKPDALTR-  
 ---  
 >Pyggy  
 ILECDSSGYA-----TGGVLSQYDDE--GVLRPCA-YFSKKNNVHECNYEIHDKELLAVVRCLEEWDAEL-----  
 RSVKSFKVITDHNLDVLY-EAKM-----LTVVGGQA-----AESIQYGA-GK-----QNVRADALS---  
 >Mdg3

ELHCDASSSG-----FGAVLMQKKE---DQKWHPVSFFSKRTTDIESKYHSFELETLAIVYSLRRFRVYL-----  
 HWRTFKIVTDCNSLILTL-SKKE-----LNPRIARW-ALEF-----QGYDFEIVHRA-GS-----RMQHVDALSR---  
 >Mdg1  
 CITTDASKQA-----CGAVLSQDHN--GQQLPVA-YASRSFTKGESNKSTTEQELAAIHWAINHFRPYV-----  
 YGRHFLVQSDHRPLSYLF-SMRN-----PSSKLTRM-RLDL-----EEFEFTVEYLK-GK-----DNHVADALFR---  
 -  
 >SPM  
 VLACDASPYG-----LGVVLSHLMED--GEERPVA-YASRTLTKSEQNYSQIEKESLAIYGVTKFHKYL-----  
 YGRKFTLLTDHQALTIIF-GSKKG-----IAAARLQRW-ALIL-----MAHQYEIKYRK-ST-----EHANADVLSR--  
 --  
 >Mag  
 VLTVDASARG-----LGAVLAQRGPG--CQERVVA-YASRALTHELHYSQIHKEALAIVFAVEKFHQYL-----  
 YGRKFILRTDHPKPLVSIF-GPNIG-----IAASRLQRW-AIKL-----SAYDFEIEYVR--T-----DKNVADALSR---  
 >Cer4  
 IVAADASKYG-----IGGVILHVNPDP--GVEVPIA-HFARSLTETEKRYSQIEKEALALIYTVKKSCHKV-----  
 FGRRFKLQTDHRPLLALF-GDNRD-----LSQNRIVRW-ATTL-----MSYDFELSYVA-TE-----  
 KFAKADWLSR---  
 >SURL  
 KLSADASKNG-----IGAVLLQQHD--ENWVPIA-YASRSMTDAETRYAQIEKELLAITYACERFHQYI-----  
 YGQQVEVETDHPKPLIF-VKSLG-----DIQRLLRV-----QRYDLKVMYTP-GK-----YMYTADTLR---  
 >Zam  
 ILTTDASNFA-----LGAVLSQGS--QNDRPVC-FASRTLSDEVNYSTIEKEMLAIIWAVKYFRPYI-----  
 YGVKFTIVTDHPKPLIWLW-NFKE-----PNSKILRW-RLQL-----MEYNFEIHKK-GS-----QNVIADALSR---  
 >Cigr-1  
 QVETDASDYA-----IAAVLSQS-----GRPVA-YMSRTLNTCERNYPAIEKEATAVVEAVRKWSHFL-----  
 KGKSFTLVTDQRSVSFMF-DQRNRG-----KNSKILMW-RLEL-----SQFTYDIVHRP-GR-----DNFVPDALSR-  
 ---  
 >Gmr1  
 TLQTDASEVG-----LGGVLSQARNE--REEHPVT-YLSRKLPHERNYSTVEKEALAIKWAVNKLTYYL-----  
 LGHQFVLVTDHAPLKWMA-TAKD-----TNARITRW-FLSL-----QPFSFTVEHRP-GR-----EHTNADALSR--  
 --  
 >Tom  
 VLTTDASNLA-----LGAVLSQ-----DNHPIS-FISRTLNDHELNYSTIEKELLAIVWATKTFRHYL-----  
 LGRHFQIASDHQPLRWLH-NLKE-----PNAKLQRW-RIRL-----AEFDFHIEYIK-GK-----QNSIADALSR---  
 >Diaspora  
 ELMCDASNYA-----LGAVLAQKID--KLPRVIY-YASRTLDAAQANYTTTEKELLAIVFALEKFRSYL-----  
 LGTHIIVYTDHAALKYLL-KKVD-----SKPRLIRW-MLWL-----QEFDLEIRDRS-GA-----QNLVADHLSR---  
 -  
 >Athila4-1  
 EIMCDASDYA-----VGAVLGQKID--KKLHVYI-YASRTLDAAQGRYATTEKELLAIVVFAFEKFRSYL-----  
 VGSKVTVYTDH-ALRHLY-AKGD-----TKPRLLRW-ILL-----QEFDMEIVDKK-GI-----ENGAADHLSR--  
 -  
 >Woot  
 YVQTDSSGYG-----LGAELYQIQED--GSRGVIA-FASRSLRGPENYTTTEKELLGVIFALHKFRYI-----  
 QVTKIIRTDHQALFSL-RCRL-----LSERLTRW-TLIL-----GQYDYEIELVK-GK-----GNVVADILSR---  
 >Gypsy  
 DLTTDASASG-----IGAVLSQEG-----RPIT-MISRTLKQPEQNYATNERELLAIVWALGKLQNFL-----  
 YGSREINIFTDHPQLTFAV-ADRN-----TNAKIKRW-KSYI-----DQHNAKVFYKP-GK-----ENFVADALSR-  
 ---  
 >Reina  
 VVETDASGSG-----IGAVLQKKG-----HPIA-YISKALGPKNLGLSTYEKEYLAILFAVDHWRPYL-----  
 QHGEFFIKTDQSLTHLE-DQKL-----STIWQKA-ITKL-----LGLQFRIYKK-GV-----ENRVADALSR---  
 >Galadriel  
 EVHTDASDKA-----IGGVLVQEG-----HPVA-FESRKLNDAEQRYSTHEKEMVAVVHCLQVWRVYL-----  
 LGTRFVVRTDNVANTFFK-TQKK-----LSPKQARW-QEFL-----AEYDFMWEHKP-GK-----  
 HNQVADALSR---  
 >CRM  
 ELECDASGIG-----LGGVLLQEG-----KPVA-YFSEKLSGSLVNYSTYDKELYALVRTLETWQHLY-----  
 WPKEFVIHSDHESLKHIR-SQK-----LNRHAKW-VEFI-----ESFPYVIKHKK-GK-----ENIADALSR---  
 >Del  
 VVYTDASLAG-----LEGVLMQDG-----RVVA-YASRQLKVHENNYPTHDELEAVVIFILKLWRHYL-----  
 YGEDFELYCDHKSLEYIS-TQKD-----LNLQRW-IEVL-----KDFDFSIFYHP-GK-----ANVVADALSR---

>Koala  
 SGYSDADWAGNGDDRRST---GGFAVFLGN-----SLVS-WSARKQP--  
 TVSRSTESEYKAMANATAEIMWIQTLLKEIHVSNSPARLWCDNLSAKYLS-SNPIFHARTK-----HIEVDYHFV-  
 RERV-----QKLELVGFVP-TG-----DQIADGFTK----

>Hydra1-2  
 VAYCDADFASDLNDRRST---TGYCFSLSA-----PLIS-WKSKKQS--  
 TVALSTCEAEYMALTVTTQESMYLVQLLSMENDCMYMPVQIFEDNQGAIALS-KNPVCRQRCK-----HVDVRYHFI-  
 RSAL-----SDGKVTVEYCP-TE-----DMVADVMTK----

>pCretro6  
 VGYSADWGANPDDQKSI---SGYVFLGG-----APVC-WASRKQK--  
 SVALSSMEAEYMAGSTAASQALWCRMLLEELGFAQNPPTLLYMDNQSALALA-RNTGTQGRAK-----HIDIRYHFL-  
 RDKI-----SSKEISVAHCP-GE-----DN-PADIFTK----

>Vitic1-1  
 VGYTDSWAGCLEDRKNT---SSYMFLG-----  
 SVWLRRILADISQEHEESTIYCDNKAAIAMT-KNPAYHGRTK-----HVDIRVHFI-RDLV-----VEGKVVLQYCN-  
 TN-----EQVADVLTK----

>Tnt-1  
 KGYTDADMAGDIDNRKSS---TGylFTFSG-----GAIS-WQSKLQK--CVALSTTEAEYIAATETGKEMIWLKRFL-  
 QELGLHQKEYVVYCDQSALDLS-KNSMYHARTK-----HIDVRYHWI-REMV-----DDESLKVLKIS-TN-----EN-  
 PADMLTK----

>SIRE1-4  
 VGYCDADWAGSADDRKST---SGGCFYLG-----NLIS-WFSKKQN--CVSLSTAEAEYIAAGSSCSQLVWMKQML-  
 KEYNVEQDVMPLYCDNMSAINIS-KNPVQHSRTK-----HIDIRHHYI-RDLV-----DDK VITLKHVD-TE-----  
 EQIADIFTK----

>Copia  
 IGYVDSWAGSEIDRKST---TGylFKMFD-----NLIC-WNTRKQN--  
 SVAASSTEAEYMALFEAVREALWLKFLLTINIKLENPIKIYEDNQGCISIA-NNPSCHKRAK-----HIDIKYHFA-REQV-  
 -----QNNVICLEYIP-TE-----NQLADIFTK----

>CoDi6.7  
 EVYADADFGDPDTARSR---TGFAIFYAG-----CPVT-WQSKLQT--  
 EISLSTTESEFVSLSTALRTALPLIGLALGFDISVTVPVAFDDNMGAIEIA-LVPKMRPRTK-----HINVKYHHF-RQHV-  
 -----DNGDITIQHVD-SE-----DQIADFLTK----

>1731  
 TGFVDADWGGDRLDRKSY---TGYVFFLSG-----GPVS-WRSEKQK--  
 SVALSSTEAEYMALTTACKEAIALRRLIEIVCGDLKTPTVMHGDNLKAAQLA-KNPVHHSRTK-----HIDIRYH--  
 REVM-----KEGHVVLEYTS-TN-----EMIADINTK----

>CoDi6.3  
 VCYSDDYAGDPDTRRSV---SGYLYVKG-----VPIC-WRSKAQR--SITLSSSEAEWIALSEATKEIMFVLQLL--  
 LYIKVQLPITVRVDNIGAIWMS-QNVNTSSRTK-----HVDIRTKYV-NEYC-----EDGVLKIIFVK-SA-----DN-  
 DSDIMTK----

>Zeco1  
 VVFSADSLGNLPDGGTQ---GGTLIGLCW-----QSKKIR--  
 RVVRSSTLAGETLALS DGIDNAIFLTTLFTIGNAELNTPPLICVTDNHSLFDA--LKSTKQR-----LRLEISSI--KDLQ-----  
 ---SKKIKKVLWSD-TK-----TQLADCLTK----



**Dataset S7.** IN alignment generated by Mafft 7.402 and used to reconstruct the phylogenetic tree in Fig. 4.

```

>Loki-Xla
HDA-PTAGHRGEKITYELLRDYAYWPHMLQDVRTYCOGCLVCPQFQPQG-PNHRAPLMKR----GISMPWSDIQIDFIGPV-
TTS----SKGNRYML-TVTCLFTKWVECLPCKTC-SSSVCASLLINHIF--SRFGLPQRIESDRGSHFTSEV-----
MTKMWEIL-GVKRKLHAIYRPASSGGVERYNQSIIVNILKKFV-----KE---SGKDWDVKLPLVLMAIRATPSAA-T-----
KLSPFEMITGRKMVLPQHL
>Loki-Xtr
HDA-PTAGHRGEKITYELLRDYAYWPHMLQDVRTYCOGCLICPQFQPQG-PNHRAPLMKR----GISMPWSDLQIDFIGPV-
TTS----SKGNRYML-TVTCLFTKWVECLPCKTC-SSSVCASLLINHIF--SRFGLPQRIESDRGSHFTSEV-----
MTKMWEIL-GVKRKLHAIYRPASSGGVERYNQSIINILKKFV-----KE---SGKDWDVKLPLVLMAIRATPSAA-T-----
KISPFEMITGRKMVLPQHL
>Loki-Npa
HDA-PTAGHRGEKITYELLRDYAYWPHMLKDVTYCOGCLVCAQFQPQG-PTHRAPLQKK----
GFSLPWSLQIDVFIGPV-TRS----SRGNKYML-TVTCVFTKWVECLPAHNN-TAETCATLLINHVF--
SRYGLPLRIDTDRGSHFISEV-----MSKMWKIL-GVKRKLHAIYRPASSGSGVERYNQSIIVNILKKFV-----KE---
SGKDWDVKLPLVLMAIRATPSAA-T-----KMSPFELMTGRKMVLPQHL
>Loki-Rca
HDA-PTSGHRGEKITYEILRDYAYWPHMLRDVKAYCOGCLICPQFQPAS-PTHRAPLQKR----GICMPWSDLQMDFIGPV-
TKS----SRGNRYML-TVTCLFTKYV-CIPAPNN-SSDTCAALLINHIF--SRFGLPQRIESDRGTHFTSEV-----
MTKLWKIL-GVKRKLHAIYRPASSGGVERYNQTIIVNILKKFV-----KE---TGKDWDVKLPLVLMALRATPNTV-T-----
KMSPFELMTGRRMVLPQHL
>Loki-Sme
HDS-PCSGHRGIKATLKSLEAVYWPHMQKDVLDIYKGLVCCQFQPAS-TLHRAPLQRR----
GVSPWSDLQIDWVGPL-TKS----TRGNKYFL-TVVCAFTKWVECLPAPND-TAQTAYLLMNHIF--
SRFGLPGRVNSDRGTHFTAEM-----MQLWQLL-GVKANFHISYRPQSSGQVERANRTVVNLRKYV-----SS---
NHKDWDVKLPLVLMAIRATPHES-T-----GLSPFELMTGRQMTLPLHL
>Loki-Sri
HDS-PCAGHKGSKATYNALRQVAYWPQMRKDVADYIKGLVCCQFQPAN-PVHRAPLQRR----
GISFPWSDLQIDWVGPL-TKS----TRGNKYFL-TVTCVFTKWVECLPAPND-TAQTAYLLMNHIF--
SRFGLPSRVNSDRGTHFTAADV-----MQELWQIL-GVKANFHISHHPQASGQVERANRTVVSVLKKYV-----TS---
NHRDWDVKLPLVLMAIRATPHEA-T-----GFSPFEMMTGRQMTLPLHL
>Loki-Oja
HDL-PSSGHKGINATYSALKQIAFWPHMKKDVTDYVNGCLVCCQFQPTN-PTHRAPLQKK----GISFPWSDLQIDWVGPL-
TKS----SRGNKYFL-TVTCVFTKWVECLPAPND-TAQMALLLMNHVF--SRFGLPMRVNSDRGTHFTAEV-----
MQQVWNTL-GVKANFHVSHHPQSSGQVERANRTVVNLRKYV-----AA---SHKDWDIKLPLVMMAIRATPHES-T-----
GTSFEMMTGRQMTLPLHL
>Loki-Ame
HDS-PSAGHKGIKETYRTLKQVAFWPRMREHVASYIKGLVCCQFQPAN-PLHRAPLQRR----
GLTFPWSLQMDWVGPL-TKS----ARGNKYFL-TVTCVFTKWVECLPAAND-TAITACLIVNHIF--
TRFGLPCRVDSDRGTHFTAEV-----MQQMWHVL-GVKAKLHVSYHPQSSGQVERANRTVVSILKKFV-----AT--
-HHRDWDVKLPLVLMAIRATPHDS-T-----GVSPFEMMTGRQMTLPLHL
>Loki-Lro
HDA-ACAGHHGTRATYETLKQVAYWPGMQQDVAEYVKGCLVCCQFQPAN-PNHRAPLQRR----
GVTFPWSLQIDWVGPL-PRS----TRGNKYFL-TVVCQFTKWVECLPAPND-TAQTAYLLMNHIF--
SRFGLPLKVNDRGTHFTAEL-----MQQIWKLL-GIHAQLHISHHPISGQVERSNTVVSMLRKYV-----SA---
NQKDWDVKLPLVLMAIRATPNES-T-----GVSPFELMTGRLMTLPLHL
>Loki-Tfu
HDA-PCAGHHGKATYETLKQVVYWPGMQQDVTEYVKGCLRCCQFQPAN-PNYRAPLQRR----
GVTFPWSLQIDCVGPL-PRS----TRGNKYFI-TVVCQFTKWVECLPAPND-TAHTTAYLLMNHIF--
NRFGLPLRVNSDRGTHFTAEV-----MQQIWKLL-GVKAKLHISHHPISGQVERTNRTVVSMLRKYV-----AA---
NQXDWDVKLPLVLMAIKATPQES-T-----GISPFELMTGRQMTLPLHL
>Loki-Bpe
HDT-PVAGHRGVQATYQALQVAYWPHMRKDVQEYTKGCLVCCQFQPSR-PLHRAPLHKR----
GITFPWSLQIDWVGGL-TKS----ARGNKYIL-MVTCVFTKWVEGLPAPND-TAQTAFLLMNHVF--
SRFGLPCKIDSDQGHFTAASV-----MSELWQTL-GVKATFHISHHPMASGQVERTNRTVINILKKYV-----SA---
NQRDWDVKLPLVLMAIRATPNKS-T-----GISPFEMMTGRQMTLPLHL
>Loki-Dcl
HDT-PSARHHGTSTTYETLEQAAYWPSMQQDLAEYVKEFFPCYQFQPTK-TNHRASLQRR----
GVTFPWSLQSDWVGPL-PRS----TRGYKYFL-TVVFQFTKWVECLPAPND-TAQTAYLLMNHIF--

```

SRFGLPLRVNSDRGTHFTAEL-----MQQTWKLL-GIARLHISQHPASRQVERMNRRTVVSMLRKFV-----SP---  
 NQKDWDVKLPLVLMAIRATPNEA-T-----GVSPFELMTGRQMTLPLHL  
 >Loki-Str  
 HDE-PCGGHRGVKATCETLRQVAHWPHMEQDVARYVRGCLVCCQFQPTK-PLHRAPLQKR----  
 GVSYPWSSIQIDWVGPV-ARS----ARGNKYLL-TVTCAFTKWVECLPATND-TAETTAVLLLNHFV--  
 SRFGLPGEVDSDRGTHFSAAV-----MTELWKLL-GVKAKLHIAHYHPRSSGGVERSNQSVIRILRKYV-----AA---  
 NHKDWDKLLPLVLMAIRATRNRST-T-----GMTPFEMMTGRQMTLPLHL  
 >Loki-Sau  
 HDT-PIGGHRSYKATLTKLQVAYWPFMARDTKLYVQGCLICCFQPSR-PLNRAPLQER----GITFPWSHLQVDWIGPV-  
 PKS---SRGNKYLL-TVTCSTFKWVECLPAPND-TAVTTAVLLMNHVF--SRWGLPLSIDS DRGTHFTSSV-----  
 TTALYDIL-GVEAKFHIAHYHPQSSGQVERANRTIVNMLKKYV-----GS---NGKDWDKLLPLVLMAIRSTPHRS-T-----  
 GVTPEFEMMTGRQMTLPIHL  
 >Loki-Ofa  
 HDS-PVGGHRGYRATLQTLQVAYWPLMARDTKSYVQGCLVCCQFQPSR-PLGRAPLQKR----  
 GVTFPWSHLQVDWVGPV-PKS---SRGNKYLL-TVTCAFTKWVECLPAPND-TAMTTATLLLNHFV--  
 SRWGLPLSVDS DRGTHFTSSV-----MTTLYDIL-GVEVKFHISHHPQSSGQVERANRTIVSMLKKYV-----SS---  
 NGKDWDVKLPLVLMAIRSTPHRS-T-----GVTPEFEMMTGREMTLPLHL  
 >Loki-Bsp  
 HDS-PVGGHRGYKATLQTLQVAYWPSMSKDVKIHVQSLVCCQFNPSR-PLNRAPLQKR----  
 GMTFPWSHIQVDWIGPV-PKS---SRGNKYLL-TVTCAFTKWVECLPAPND-TAVTTAVLLLNHFV--  
 SRWGLPLSVDTDRGTHFTSHV-----MTELYHIL-GVNVRFHISHHPQSSGQVERANRTIVQMLKKYV-----SS---  
 HGKDWDKLLPLVLMAIRATPHRA-T-----GVTPEFEMMTGRQMTLPLHL  
 >Loki-Pfl  
 HDS-PVGGHRGPQP-XETLRQVAYWPTNRDVKAYVRGCLVCCQFQPSQ-PLGRAPLQKR----  
 GVTFPWSHLQVDWVGPV-PRS---SRGNKYLL-TVTCAFTKWVECLPAPND-TATTTAVLLLNHFV--  
 SRWGLPLSVDS DRGTHFTSGV-----MTAMYDIL-GVKTRFHIPYHPQSSGQVERANRTIVNMLKKYV-----NG---  
 SARDWDVKLPLVLMAIRSTPHRT-T-----GITPEFEMMTGREMTLPLHL  
 >Loki-Ape  
 HDS-PVGGHRGPQTLETLRQVAYWPSMSRDVKAYVKGCLVCCQFQPSR-PLGRAPLQKR----  
 GVTFPWSHLQVDWVGPV-PRS---SRGNKYLL-TVTCAFTKWVECLPAPND-TATTTAVLLLNHFV--  
 SRWGLPLSVNSDQGTHTSGV-----MTAMYDIL-GVKARFHIPYHPQSSGQVERANRTIVNMLKKYV-----NG---  
 SARDWDVKLPLVLMAIRSTPHRT-T-----GITPEFEMMTGREMTLPLHL  
 >Loki-Pyo  
 HDS-PVGGHRGTRLLXSTLQVGYWPSMSNDTMSYVRGCLTCCQFQPSQ-PLNRAPLQGR----  
 GVSFPWSHLQIDWIGPV-PKS---SRGNKYLL-TVTCAFTKWVECLPASNG-TAVTIAVLLLNHFV--  
 SRWGLSISIDS DRGTHFTSHV-----MTSLCKIL-GVEVRFHISHHPQSSGQVERANRTIIMLKKYV-----GS---  
 NGKDWDIKLPLVLMAIRLTPHRS-T-----GVTPEFEMMTGRQMTLPLHL  
 >Loki-Cne  
 HDS-PVGGHRGYKATLHTLQVAYWPLMAND-----XRR---GVTFPWSHIQIDWVGPV-PRS---  
 ARGNKYFL-TVTCSTFKWVECLPAPND-TATTTAVLLLNHFV--SRWGLPLSVDS DRGTHFTSNV-----  
 MTALFEML-GVEVRFHISYHPQSSGQVERMNRRTVVMMLRKYV-----DS---HAKDWDVKLPLVLMAIRFTPQTS-T-----  
 GVTPEFEMMTGRQMTLPLHL  
 >Loki-Lch  
 HDE-ECGGHRADRATYETLKQVAYWPNMYQDVQDYTKGCLVCCRFQSSS-PKHRAPLQTK----  
 GITMPWSDLQIDWIGPV-TRS---SRGNKYLL-TVTCLFTKWIECLPAPND-TAETTAMLLLNHFV--  
 SCWDLPMRIESDRGSHFTGKV-----IENVWNTL-GVQRKLVSHHPQSSGQVERANKTIVNILKKYI-----ST---  
 SGKNWDVKLPLVLMAIKATPNKS-T-----GVTPEFEMMTGREMTLPLHL  
 >Loki-Pma  
 HDE-PCSGHRCEMNTGQMLRQVAYWPKMGEDIHKHVSNCLVCCKYQPTT-SQHRAPLQKR----  
 GTDYPWSNLQIDWIGPV-NRS---TKGNKYML-TVTCAFSKWIECLPAPNN-TAETTAILLINQIF--  
 SRWGLPSTIDS DKGSHFTA EV-----ITEVWKML-GVKRQLHVAYHPQSSGQVERANRTIVSLLKKYV-----ST---  
 TGRDWDTKLPLVLMAMRATPNRA-T-----GRTPEFEMMTGRLMTPVHL  
 >Loki-Lca  
 HNE-PCSGHRCEMNTGQMLRQVAYWPKMGEDVHKHVSNCLVCCKYQPTN-SQHRAPLQKR----  
 GTDFPWSNLQIDWIGPV-NRS---TKGNKYML-TVTCAFSKWIECLPAPNN-TAETTATLLVNQIF--  
 SRWGLPSTIDS DKGSHFTADV-----IAEVWKTG-LGKRLHVAYHPQSSGQVERANRTIVSLLKKYV-----ST---  
 TGCDWDTKLPLVLMAIRATPNRA-T-----GRTPEFEMMTGRQMTLPLVHL  
 >Loki-Aro  
 HDE-PCGGHRGEQPTIHMWLQVAYWFKIWTVDVKDYVNGCTICHKFQPV-PRHRAPLQSA----  
 PSAQPWSHIQIDWIGPV-TRS---TWGNXYAL-TITDRFTKWTCLTALAD-TAETTAVLLMKHFV--  
 THWGLPQSVDS DGGTHFTATI-----MEEVWKTG-LGKRLHIAHYQPSSGQVERANQTVINMLKQK-----DA---  
 NQKDWDIKLPLVLMITXAMPSKA-T-----QVSLFEMMTDRQIVLPLHL

>Gmr1  
 RDA-LLGAHLGMDKTRERVVARFYWPGVRRDVARVYQCQPCDCQVRVRPRA-VERSPLIPMP----IIETPFERIALDIVGPL-  
 PRT---SRGHRYLL-VILDYATRYPEALPLRAA-TSKAYAR--ISATL--SRVGLPKEILDQGSFCMSRV-----  
 VKELLKLL-QVSQLRTSVYHPQTDGLVERFNQTIKRMLKXSI-----EA---DGKNWDQLLPHVLFVFAIREVPQAS-T-----  
 GFSPFELLYGRRPRGILD

>ApGIN7a  
 HDS-LLGGHAGVSRVTKRKLKLNYNWRHMKKDIKHAIKHCICQKNKSHL-KTKKPLMITS---TIVKPFKNCLDIVGPL-  
 PKT---LTGNMYIL-TLQDELSRFLAIVLSTT-DAQTVAQAFVE----VSYGIPESILTDRGTNLFVDV-----  
 FKSMCKLL-DIKKSKTTPWHPQGNCFLESHKTLTKYLRSFVD-----KDSNWDKLLCYATFCYNTTVHVS-T-----  
 NFTP-----

>Mdg1  
 DDP-SEGGHSGISRTLKMKNCWPRMTKAISEYVETCLKCQAKTK-HTKTPLTITE---TPATAFDKVLIDTIGPL-  
 PRS---ENGNEYAV-TIICDLTKYLVTVPINPK-SAKSVAKAIFENFI--LKYGPMKTITTDMGTEYKNQI-----  
 IDDLCKYM-KIKNITSTAHHHQTLGTVERSHTFNEVRSYI-----SV---DKTDWDIWIQYFTYCFNTTPSVV-H-----  
 EYCPYELVFGRLPRQFIDF

>Cer3  
 HES-LGGGHFGYRKTLLHKIKRNYWPNMRSVVKWTLQCKICQKRNPH-PSTRELQKIV---ITTKVFEKVGVDLTGGL-  
 RMT---ASGNKY---MVCWFTKVFISVPLPNA-STETVADAMMKELL--LKFGTSPQLVSDRASTFTSEA-----  
 FRAFCKRL-EIQHLAIPYHSHKNGGATERTFRTFHNMVSKHV-----NK---THTDWDQILPYMTFVYNTTVHDT-T-----  
 GETPFLIFGRDPVFAIDK

>DrGIN2-2  
 HFN-DIGHHLGQKKTVHRIQSKYYWLGIVKDVVDWIKVCETCQHAERSK--NLARTVRPI---KVDGPWEILAIEIIGPF-  
 PGT---HGGNTHIV-IITDYYSKWVEAFPVQKK-DGLCVARCISS-SV--CRFGPSKTIFCSQNAADFCEEV-----  
 MKQLCERW-NITVRVLSVDQPQRNALYDRSCNLLRDTIKQMV-----VE--KQVEWDDFLDPLAIFRTSVNPT-T-----  
 KFTP-----

>HmGINA1  
 YDS-NHAAHVGLNNTRAKLKGFSYWLGMVNDITKCVKECDKQRMKIR--TIAPELXSI---KVNGLWDFLGLIDLIRPL-  
 PIT---KLGNYIL-TITDLWSKYIEAFPDK-PAFYVSKCLTT-LF--YRFGPPKKILSDQGREFVNSL-----  
 NEQLFFLF-QIKHLITSAIYHPQIGQDERTNQTIKKSLKLS-----ND---TQDNWDELLEAVLFGRLTCVQKS-T-----KFTP-  
 -----

>HmGINO1  
 HND-AGGAHQGIVRTQNKIKNLYWMSITSVVEAWIKTCKQCQSFKEIK--TIAPQLHPI---QVTERWAVLGVDLIGPL-  
 PET---VNGNKYVL-TITDLFTKWVVARVLPDK-SAAAVATALVN-NF--HTYGPPKKVITDQGREFVNEV-----  
 KTKIFQLM-GIKHSVTSAYHPQSNQDERTNQTFCALSKYT-----NN---EMNDWDRFSSXIAIYGLNISCQKS-T-----  
 KVTP-----

>HmGINNY1  
 HSAILGGGHFGRDKTLAKISERYWKGVMVNDVRSFKYCDKQCRANRAF-EKHSALHPI-K--  
 VKDEVWSTVGLDGLIGPL-PLT---EKGNKYII-TATCLFSKWPEAASLSDK-TATSAAEFLYT-CF--  
 TRHGCEVQISDQGREFVNEV-----NHELKMM-GTKCNVTSAYHPQSNGEDERFNQTLQRQLLKYV-----DE--  
 -KQNTWDLYESILFSYRVSQDS-T-----KQTP-----

>HmGINGER1  
 EKAVALASHLGINAVRKQISSRFWHSIVEDITKHVAQCERCQKTSNRN-LKVSALKPV-K--VEQQVMKQVGVDLI-KL-  
 PES---NGFNAYI-VLIDYFSKWTEAEPLIDK-TAVSVAFLYR-VI--CRHGCFQIQINDQGREFVNSV-----  
 SIALHDMS-GVQQRVTSAYHPQANGLVERQNQTIKKAIVKVL-----NE--NVKSRAVLDGILFALRVKVQDS-M-----  
 GYSP-----

>HsGIN1  
 HEN-DSGAHHGISRTLTLVESNYWTSVTNDKQWVYACQHCQVAKNTV--IVAPKQHLL---  
 KVENPWSLVTVDLMGPF-HTS---NRSHVYAI-IMTDLFTKWVILPLCDV-SASEVSKAII-IF--  
 FLYGPPQKIIMDQRDEFIQI-----NIELYRLF-GIKQIVIS-HTSGTVNPMESTPNTIKAFLSKHC-----AD---  
 HPNNWDDHLSAVSFAFNVTLEP-T-----KNTP-----

>Amn-san  
 HSS-KQAGHPGSEKTELLRRLVWVPTIRKDVDRDFVAACVCAATKASH-SRPCGLLHPL-P--IPSRPWTHLGMDFIVEL-  
 PPS---CGNTVIW-VVIDRFSKMAHFIPLRKLPSAVELAHFIQHIF--RLHGFVPEIVSDRGSQFVSRF-----  
 WRSLSKSL-GVSLQFSSAYHPQNGAAERNQALEQFLRNHV-----SL---CQDDWSDLLPWAFAHNNASHSS-T-----  
 GRSPFLSVYGGHPLAFPOD

>Sushi-ichi  
 HSS-CFACHPGVRRTAEFVQRRFWPNLQEDVREFVACTVCARSKASH-RSPAGLLHPL-P--  
 VPSRPWSHVALDFVTGL-PVS---QGNNTIL-TIVDRFSKGVHFVALPKLPSAAETAELLVSHV--  
 RLHGIPLDVSDRGPQFTSRV-----WQAFCKGI-GATVSLSSGYHPQSNQAERANQAMEAALRCVT-----TS---  
 NPASWSKFLPWVEYSLNAMESSA-T-----GMSPFQCFGLYQPPLFPQ

>Maggy

HDS-PVAGHPGKAKTYDLLSREYYWPGMLHYVSLWVKKCQTCRRINPSR-EGHQGLLRPL-P--  
 TPERSWQHLSMDFITHL-PQS-----NGHDAIL-VVVDRLTKMRHFVPCCKGTCAEDTANLYLHHVW--  
 KLHGLPLTIVSDRGTQFVSKF-----WKHLTTRL-KIDSLSTAHHPETDGTQTERFNASLEQYLRAVYV-----AY---  
 LQDDWESWPLAEFTANSHKSET-T-----GTSPLYATYGFHPRMGFE-  
 >Galadriel  
 YDS-AWAGHPGVERMLALLSRVYFWPKMEDDIEAYVKTCHVCQVDKTER-KKEAGLLQPL-P--  
 IPERPWLSVSMDFISGF-PKV-----DGKASIM-VVVDVRFKYSVFIAAPELCSSEVAAELFYKHVI--  
 KYFGVPADIVSDRDTRFTGRF-----WTALFNMM-GTELKFSTANHPQTDGQTERINHLLLEEYLRHYV-----TA---  
 SQRNWVELLDTAQFCYNLHKSSA-T-----EMSPFEIVLGKQPMPLDV  
 >Reina  
 HDS-PIGGHSGFPVYTHRIKKLFYWAGMKGOIKEFVQSCEICTKAKADR-NRYPGLLLPL-P--IPDQAWQVISLDFISGL-  
 PTS----RRFNCIL-VVVDKFSKYAHFLAMSHPFTALSVAKLFLSQVY--KLHGLPLSIISDRDPIFTSNL-----  
 WQELFKLV-GTKLCLSSAYHPQSDGQTEWVNQCVEAYLRFCV-----HG---CPKQWSNWLSLAEFWYNTCFHTA-L-----  
 GQSPFEVLYGHTPSQLGLS  
 >CRM  
 HGG-GLMGHFGAKKTEDILAGHFFWPKMRRDVVRLVARCTTCQKAKSRL--NPHGLYLPL-P--  
 VPSAPWEDISMDVFLGL-PRT---RKGRDSVF-VVVDVRFKMAHFIPCHKTDATHIADLFFREIV--  
 RLHGVPNTIVSDRDAKFLSHF-----WRTLWAKL-GTKLLFSTTCHPQTDGQTEVVNRTLSTMLRAVL-----KK---  
 NIKMWEDCLPHIEFAYNRSLHST-T-----KMCQFQIVYGLLRAPIDL  
 >Del  
 HRS-KFTIHPGSKMYRNLKINFWWSGIKREVVEYVSRLICQVQKADH-HHHSGLLQPL---PVSEKWEHILMDFIIGF-  
 PLS---KRCHDSIW-VIVDRFTKSAHFIPHIHTTISGKDLA-LYIKEII--RLHGIPPTIVTDRDTKFTSRF-----WGLS-  
 KSL-GTELFSTAFHPQTDG-SERTIQILEDMLRSCS-----LD---FKGNWEEHLPLVEFAYNNSYQSS-I-----  
 GMAPFEALYGRPCRSPTCW  
 >Skippy  
 HAH-PLHGHQGVTKMKRLQELGYRHFKKGOVEKVIKQCDLCAKTKAQR-HKPYGQLQPL-P--  
 VAQRPWDSITMDFITKL-PLS---STGYDSIM-VIVDRLTKFSYYLPYREATDAEELSYVFRHIV--  
 SIHGLPTEILSDRGPTFAATF-----WQSLMARL-GLNHRLTAFRPQVDGQTERMNQVLEQYLRCYI-----NY---  
 EQNDWVEKLPQAYNTAYNES-T-----KLTAYANFGFTPNAYHNA  
 >TF1  
 HEE-GKLIHPGIELLNTILRRFTWKGLRQIQEYVQNCHTCQINKSRN-HKPYGPHPI-P--PPERWESLSMDFITAL-  
 PES-----SGYNALL-VVVDVRFKMAILLPCTKSITAEQTARMFDQRFVI--AYFGNPKIADNDHIFTSQT-----  
 WKDFAHKY-NFVMKFSLPYRQTDGQTERNTQVEKLLRCVC-----ST---HPNTWVDHISLVQSSYNNAIHSAT-----  
 QMTPFEIVHRYSPALSPL  
 >Athila4-1  
 HGS-AYGGHFATFKTVKILQAGFWWPTMFKDAQEFVSKCDSCQRKGNIN-RRNEMPQNPI---LEVEIFDVWGDIFMGPF-  
 PSS----YGNKYIL-VAVDYVSKWVEAIASPTN-DAKVVLKLFKTIIF--PRFGVPRVVISDGGKHFINKV-----  
 FENLLKKH-GVK-----QVEISNREIKTILEKTV-----GI---TRKDWSAKLDDALWAYRTAFKTP-I-----  
 GTTPFNLLYGKLCPLVEL  
 >Diaspora  
 HSS-APGGHLGVQRTAKVLDCGFYWPTIFKDAWKICSTCEQCQRAGNLT-WRQQMPQQPM---  
 LFCEVFDVWGDIFMGPF-PVS-----FGYVYIL-LAVDYVSKWVEAKPTRTN-DAKVVADFVRSNLF--  
 CRFGVPKAIVSDQGTHFCNKT-----MHALLKNY-GVVHRVSTPYHPQTNGQAEISNREIKRILEKIV-----QP---  
 SRKDWSTRLLDALWAHRTAYKAP-I-----GMSPYRVVFGKACHLPVEI  
 >RetroSor1  
 HSG-MCGSHIGPRALSKALRQGFYWPTHIRDAEEIVKTCKACQTFSPIQ-SGPSALTQLI---PASWPLQRWGMDLVGPM-  
 PTA---QGGNKFAV-VAIEYFTRWIEAKPLTTI-TSETIRKFFWQNVIV--CRFGVPRLLTVDNGKQFDSN-----  
 FKEFCHLI-GTKIAFASVYHPESNGAVERANRTIFSAISKTL-----LNL--RKGKWEELPRVVWSHNTTVSRA-T-----  
 GFTPFKLLYGEEAMLPEEI  
 >Tat4-1  
 HEG-AGGNHSGGRSLAAKIKKHQYWPTMITDCIRFVAKCEPCQRHASII-HSPTEALTTS---TAPYPFMRWAMDIVGPL-  
 PSS----NGKRFML-IMTDYFTKWVEAEAYNKI-QAGEVQRFVWKNII--CRHGLPYEITDNGSQFISRQ-----  
 FEDFCAKW-RIRLNKSTPRYPQNGQAEATNKIILDGLKRL-----EA---KKGAWADELDGVL-SHRTTPRRS-T-----  
 GATPFSPTYGIEAMAPAEV  
 >KoRV  
 HQL---THLGPDKLLQLVGRTFHIPNLQSVVREITSKQVCAVNAVT-TYREPGRRQ----RGDRPGVYWEVDFTEVK-  
 PGR-----YGNRYLL-VFIDTFSGWVEAFPTKTE-TALTVCKKILEEIL--PRFGIPKVLGSDNGPAFVAQV-----  
 SQGLATQL-GIDWKLHCAYPQSSGQVERMNRTIKETLTKLA-----LET--GGKDWVTLPLALLRARNTPGQF-----  
 GLTPYEILHGGPPVVLASG  
 >MuLV  
 HQL----THLSFSKTKALLERNYYMLNRDRTLKDITETCQACAQVNASK-SAVKQGTRV-----RGHRPGTHWEIDFTEVK-  
 PGL-----YGYKYLL-VFIDTFSGWVEAFPTKKE-TAKVVTKLLEEIF--PRFGMPQVLGTDNGPAFVSKV-----

SQTVADLL-GVDWKLHCAAYRPQSSGQVERMNRITIKETLTKLT-----LAT--GSRDWVLLLPLALYRARNTPGPH-----  
 GLTPYEILYGAPPLVNF  
 >FLV  
 HKL---THLSARKMKTLLEFYLPRDLHLRQVTESCRACAQINAGK-IKFGPDVRA----RGRPPGTHWEVDFTEIK-  
 PGM----YGYKYLL-VFIDTFSGWAEAYPAKHE-TAKVVAKKLEEIF--PRYGIPQVLGSDNGPAFISQV-----  
 SQSVATLL-GINWKLHCAAYRPQSSGQVERMNRISIKETLTKLT-----LET--GSKDWVLLLPLVLYRVRNTPGPH-----  
 GLTPFEILYGAPPPMAHFF  
 >REV  
 HRA----THLGESKLTTELVRKHYLICGIYRAARDITTRCVACAQVNPQA-APVEKGLNSR---IRGAAPGEHWEADFTEMI-  
 TAK----GGYKYLL-VLVDTFSGWVEAYPAKRE-TSQVVIKHLIHDII--PRFGLPVQIGSDNGPAFVAKV-----  
 TQQLCEAL-NVSWKLHCAAYRPQSSGQVERMNRITKETIAKLR-----KE--TGGDWVSLLPQALLRARCTPGRE-----  
 GLSPFEILYGLKPPVVP--  
 >Xen-1  
 HGP----THVSKNLMNLSKLYFAPGITTLTRNYTAACTICAQCNPGR-MEKPPVLNLA---KPLYPFQRIQIDHIQM--PRC--  
 ---GRFEYVL-VVVDVDFSGWPEAFPVANM-TAKTTAKKLLSEIV--CRYGVPEVIESDQGPVFTASV-----  
 TKDIWTAL-GVTLHFHTPYHPQSSGKVERMNGTLTKMLKMS-----QD---SGMLWPDSPALFVRYTPRGV-N-----  
 NLSPEILFGCAPRL----  
 >WDSV  
 HGV---SHTHKGIMSYFSKFWTHPKASQTIDLILGHCQICLKHNPKY-KSRLQGHRP----LPSRPF AHLQIDFVQMC-----  
 -VKKPMYAL-VIIDVFSKWPEIIPCNE-DAKTVCDILMKDII--PRWGLPDQIDSDQGTHTAKI-----SQELTHSI-  
 GVAWKLHCPGHPRSSGIVERTNRTLKSKIIKAQ-----EQL--QLSKWTEVLPYVLEMRATPKKH-----  
 GLSPHEIVMGRPMKTTYLS  
 >Kabuki  
 HNL----SHPGIRTRKMITNTFFWPNMKNKDIGMWAKPCIRCQESKIYR-HTISDLGNF----VDAGRFEHIIHVDIVGPL-PTS--  
 --PQGFYCI-TIIDRCTRWEAFPVHDI-TADKVAKTIYDGWI--TRFGCPVRIITSDQGRQFESNL-----FLKLTKLL-  
 GINKICTTPYHPQSNGAVERWHRSLKVALMTRL-----NDTSWDELSTAMFGLRASVRTD-S-----  
 GVSAAQLTYGKNIRLPGDF  
 >FFV  
 HNI---SHAGREAVLLKIQENYWWPKMKKDISSFLSTCNVCKMVNPLN-LKPISPQAIV---HPTKPFDFKYMDYIGPL-  
 PPS----EGYVHVL-VVVDAATGFTWLYPTKAQ-TSKATIKVLNH--L--TGLAIPKVLHSDQGSFTSEE-----  
 FAQWAKER-NIQLEFSTPYHPQSSGKVERKNSEIKLLTKL-----VG---RPLKWYNLISSVQLALNNTHVVS-T-----  
 KYTPHQLMFGIDCNLPFAN  
 >SFV  
 HEL---AHTGREATLLKLTQTHWPNMRKDIITVLRQCKPCLQTDSTN-LTPIPPVSQP---RPVKPFDFKFIDYIGPL-PPS--  
 --HGFSYVL-VIVDARTGFTWLYPTKAP-STNATINSLN--L--LGT AIPKVLHSDQGSFTSAT-----FAEWAKDR-  
 SIQLEFSTPYHPQSSGMVERKNKEIKRLITKLL-----VG---RPTK WYPLLPVQLALNNTYSPR-T-----  
 KLTPHKL LFGVDGNVPFAN  
 >BFV  
 HDG-PGSAHLGRSALLLKLQKYWWPRMHIDASRIVLNCTVCAQTNSTN-QKPRPPLVIP---  
 HDTKPFQVWYMDYIGPL-PPS----NGYQHAL-VIVDAGTGTWYPTKAQ-TANATVKALH--L--  
 TGTAVPKVLHSDQGPAFTSSI-----LADWAKDR-GIQLEHSAPYHPQSSGKVERKNSEIKRLLTKL-----AG--  
 RPTK WYPLIPIVQLALNNTPNTR-Q-----KYTPHQLMYGADCNL PFEN  
 >EFV  
 HKG-PGSGHLGKNTMYIKILNKYWWPNLIKDISKYIRTCTNCIITNTDN-VPNKSYIVQE---KTGLPFQKYMDYIGPL-  
 PPS----DGYHVL-VIVDEGTGYTWLYPTKAQ-TANATVKALNH--L--TGT AIPKVLHSDQGSFTSAT-----  
 LVAWAKDK-GIQMEYSSPYHPQSSGKVERKNSEIKRLLTKL-----VG---RPTK WYPLIPIVQLALNNTPNAK-I-----  
 GKTPHQLMYGVDCNL PFQD  
 >CoEFV  
 HCG-IGHIHLGGNNTGKTLRRLYWWPGLYTECKRYVANCPCLAVNVTPT-TTRPPNLRP----PRGALFDKIFLDFVGPL-  
 PRS----NGYTAIL-ILVESLSSFTWLLPCRDQ-SASTVTALSA-FF--PASIEPKCFHSDQGGDFTSQL-----  
 FKKMC SER-NIRVEYSTPHHPQSAGVVERKNRGLKAALTKLV-----RN---RPRKWFQVLDIVQTGLNNTPIAR-N-----  
 HGATPFFLMYGQHMNTPLTN  
 >ApGIN5c  
 D-----LKKIGKIMNVCVTCILANRKQ-GKKEGFLHSI-D--KSDTPLAMWHIDFLGPL-TPT---PKGYRHIL-  
 SVIDGFTKFCWLFPTKSV-TAQEVIEKLTVM--ATFGNPGKIVCDRGTAFSTKD-----FGDYCSGR-  
 EIRHILITIGVPRANGQVERLNTIINVLTKLS-----LN--KTQWYRQYQSIKEAV-----  
 >Mdg3  
 HNE---LGHVGRDKMIEAIMKNYWPNLKQKCSHISNCLKCISFSPKT-GKTEGFLHNI-P--KGNKPF EIIHIDHYGPV-----  
 --RPKKHIL-VIVDAFTK FVRLYATKTT-NTKEVIQSLND-YF--RAYSRPKCIISDRGACFTSGD-----FDSFLKEC-  
 NVKHIKIATGSPQANGQVERINRSLGPMISKLI-----EP---DGLHWDLVLEKVEYTLNNTLHRS-I-----  
 KQYPSIMLFG LQKQGQIMD  
 >Tor2



>AciFLERV  
HEA---LGHAGADPTRRELKKQLWIP--VREIRRVLKDCVECGRYNAGR-RGQRMGGLTI---KSTVPWGSICMDVAGPL-  
GIT---GMKGEKYLL-VLVDSMSGYVAVKPVRQA-NGSSVVSMLDQ-AC--CYMGIPKELRTDNGTHFRNAK-----  
VDQWCQEN-GVMRVYSPPYTPQANGVVERTIGLVKSWIGKNA-----NGKEWSTKVLELVKTLNDSPAEE-L-----  
NQRPFTSIQGVEQLKPVDP  
>AiiFLERV  
HEA---LGHAGLLPTRRGLVKQLWIP--MKQIQQLKRCVCGKYNAGR-RGKRTEGLTI---KSTIPWGSICMDVAGPM-  
GVT---GTKGEKYLI-VLVDSMSGFVVVRPVRKA-NGNSVVSMLDY-TC--ACLGIPRELRTDNGTHFKNVQ-----  
VNRWCEQH-GVMRVYSPPYTPQANGVAECTIGLVKNWLAKNA-----NSKEWSLKSVDIGRALNDSPSDE-L-----  
NQRPFVTIQGVEQLKPALG  
>Cigr-1  
HNN---LGHPGFSRLYHFIFIKTRNL-PFSSEEAKIICRQCKTCAEVKPRF-YKPASRNLI----KAMRPWERLSMDFKGPV-----  
KGRNSYLL-IIVDEYSRFPFVPCRM-TSAVVIQCLTN-LF--CLFGFPAYVHSDRGLSFISHE-----VKVFLTER-  
GIATSKSTPYHPQGSQCERVNQTIWRTVKLLL-----HGK--LEEQWEEVLPQALHAIRSLVCLA-T-----  
NETPHERFFNFSRRS----  
>JSRV  
HDL---HHQNSHSL-----RLQFKISREAAARQIVKSCSTCPQFFVLP---QYGVNP----RGLRPNHLWQTDVTHIP-----  
QFGRLLKYVH-VSIDTFSNFLMASLHTGE-STRHCIQHLLF-CF--STSGIPQTLKTDNGPGYTSRS-----FQRFLCSF-  
QIHHTGIPYNPQGGIVERAHRQRIKHQLLKQK-----KGN--ESPSPHNALNHALYVLNFLTLDT-E-----  
GNSAAQRFWGERSSC----  
>SRV-1  
HTL---HHLNAQTL-----KLMFNIPREARQIVRQCPCATYLPVP---HLGVNP----RGLLPNMIWQMDVTHYS-----  
EFGNLKYIH-VSIDTFSGFLATLQTGE-TTKHVITHLLH-CF--SIIGLPKQIKTDNGPGYTSKN-----FQEFCSL-  
QIKHVTGIPYNPQGGIVERAHLKTTIEKIK-----KGE--WKGTPRNILNHAFILNFLNLDL-Q-----  
NHSAADRFWHSNPRK----  
>MMTV  
HAL---HHQNAAAL-----RFQFHITREQAREIVKLCPCPDWGHAP---QLGVNP----RGLKPRVLWQMDVTHVS-----  
EFGKLYVH-VTVDTYSHFTFATARTGE-ATKDVQLHLAQ-SF--AYMGIPQKIKTDNAPAYVSR-----  
IQEFLARW-KISHVTGIPYNPQQAIVERTHQNIKAQLNKLQ-----KAG--KYYPHLLLAHALFVLNHNMDN-Q-----  
GHTAAERHWGPISAD----  
>RSV  
HTA---LHIGPRALSKAC-----NISMQQAREVVQTCPCNSAPALE----AGVNP----RGLGPLQIWQTDFTLEP-----  
RMAPRSWLA-VTVDTASSAIVVTQHGRV-TSVAVQHHWAT-AI--AVLGRPKAIKTDNGSCFTSKS-----  
TREWLRW-GIAHTTGIPGNSQGMVERANRLKDRIRVLA----EGD--GTSKQGELLAKAMYALNHFERGE-N-----  
TKTPIQKHWRPTVLT----  
>LDV  
HAF---LHLGAKALAEQEC-----NIPLTEVERLVKSCSHCQKTPLWM---AGVNP----RGLPNQIWQTDFTMYP-----  
PFRPNHWLA-VTVDTYSGVIVATAHRGT-KSRHAIHHWTA-AI--AYLGRPSVIKTDNGSAFTSKA-----  
ATAWAQRW-HITLKHGIAYNSSQQAIVERANRTLKARLEALG-----EGE--GPEHQPELLYRALYSMNFFARST-----  
EQTSVARHWSHQRLP----  
>BLV  
HKL---THCN-----SRSRWPNSAWDPRSPATLCETCQRLNPTG-GGKMRTIQ-----RGWAPNHIWQADITHYK-----  
YKQFTYALHVFVDTYSGATHASAKRGL-TTQMTIEGLLE-AI--VHLGRPCKLNTDQGANYTSKT-----  
FVRFCQQF-GISLHHVPYNPTSSGLVERTNGLLKLKLLSKYH-----LDE--PHLPMTQALSRLWTHNQINLLP-I-----  
LKTRWELHHSP-----  
>HTLV-2  
HGL---THCN-----QRVSGATPREAKSLVQTCHTCQTINSQH-HMPRGYIR-----RGLLPNHIWQGDVTHYK-----  
YKKYKYLHVWVDTFSGAVSVSCKKKE-TSCETISAVLQ-AI--SLLGKPLHINTDNGPAFLSQE-----FQEFCTSY-  
RIKHSTHIPPYNTSSGLVERTNGVIKLNLLNKYL-----LDC--PNLPLDNAIHKALWTLNQLNVMN-S-----GKTRWQIHHSP-  
-----  
>HERV-L  
HEQ---SGHGGRDGGYWAQNQQHGLPLTKADLATATAECPICQQQRPTL-SPRYGTI---P--QGDQPATWWQVDYIGPL-  
PSW-----KGQRFVL-TGIDTYSYGFAYPACNA-SAKTTIHGLTE-LI--HHHGIPHSIASDQGTHTAKE-----  
VWQWASVQ-GIHWSYHVPHPHPEAAGLIERWNGLLKSQLQCQL-----GDN--TLQGWGKVLQKAVYALNQHPHYG-----  
TVSPIARIHGSQTMP----  
>MuERV-L  
HEQ---SGHGGRDGGYPWA-QQHGLPLTKADLATAAADQCICQQQKPTL-SPRYGTI---P--RGDQPATWWQVDYVGPL-  
PSW-----KGQRFVL-TGVDTYSYGFAPARNA-SAKTTIHGLTE-LI--YRHGIPHSIASDQGTHTARE-----  
VRQWAHDH-GIHWSYHVPHPHPEAAGLIERWNGLLKMLQHQQL-----GGN--SLEGWGRVLQKAVYALNQRSIYG-----  
TVSPIARIHGS-----  
>HIV-1

HEK----YHSNW---RAMASDFNLPPV--VAKEIVASCDKCQLKGEQV-----DCSPGIWQLDCT-----  
 HLEGKVL--VAVHVASGYIEAEVIPAE-TGQETAYFLK-LA--GRWPV-KTIHTDNGSNFTGAT-----  
 VRAACWWA-GIKQEFGIPYNPQSQGVVSMNKELKKIIGQVRD-----QAEHLKTAVQMAVFIHNFKRKGGIG-----  
 GYSAGERIVDIIATD----  
 >FIV  
 HEK----FHSDP---QYLRTEFNLPKM--VAEEIRRKCPVCRIRGEQL-----KIGPGIWQMDCT-----HFDGKIIL-  
 VGIHVESGYIWAQIISQE-TADCTVKA VLQ-LL--SAHNV-TELQTDNGPNFKNQK-----MEGVLYNM-  
 GVKHKFGIPGNPQSQUAL VENVNHTLKVWIRKFLP-----ETTSLDNALSLAVHSLNFKRRGRIG-----  
 GMAPYELLAQQESLR----  
 >EIAV  
 HEN---WHTSP---KILARNYKIPLT--VAKQITQECPHCTKQGSCV-----MRSPNHWQADCT-----HLDNKIIL-  
 TFVESNSGYIHATLLSKE-NALCTSLAILERLF-----SPKSLHTDNGTNFVAEP-----VVNLLKFL-  
 KIAHTTGIPYHPESQGIVERANRTLKEKIQSHRD-----NTQTLEAALQLALITCNKGRESM-G-----  
 GQTPWEVFITNQAQV----  
 >Gypsy  
 HNR----HRAAQENIKQVLRDYYFPMGSLAKEVAVANCRVCTQAKYDR-HPKKQELGET-P--IPSYTGEMVHIDIF-----  
 -STDRKFL-TCIDKFSKYAIVQPVVS-R-TIVDITAPLLQ-II--NLFPNIKTVYCDNEPAFNSET-----VTSMLKNS-  
 GIDIVNAPPLHSSSNGQVERFHSTLAEIARCLK-----LDK--KTNDTVELILRATIEYNKTVHSV-T-----RERPIEVVHP-----  
 --  
 >Zam  
 NSN----HRGIDETFLHLKRETYFPNMKNKISELIRNCETCLKLYDR-QPQNVFETP-E--TPSKPLDIIHIDIY-----  
 TINNNFNL-TIIDKFSKFAAVYPIPNR-NGINCIAIKN-FF--SQFGLPKLIHQDQVEFCNDI-----FRKFCSQY-  
 NILHVTFSQSSSNPVERLHSSLTEIYRILL-----DTRK-KPTDHEEIMSETVITYNNAIHST-T-----  
 KHTPFELFNGRTHLF----  
 >Tom  
 HEK----HPGIQKMTLKFENHYFPNSQLLIQNIINECRVCNLAKTEH-RNTKMPFKVT-P--SPGHCRDKFVIDIY-----  
 SSEGKHYL-SCIDIYSKFATLEQIKTK-DWIECKNALMR-IF--NQLGKPTLLKADRDGAFSSLA-----LKQWLESE-  
 GVLEQLNTAKTG VAD--VERLHKTINEKIRIIN-----SSK--NDEIKLGKMENILYIYNHTRHDT-T-----  
 GQTPAHIFLYAGQPT----  
 >Tor4a  
 -----HTGIDQTFSKIAKKYVWPRMNMAIREFIRTCDFCQKDKPNF-HPNRAPVLSF-R--TPNGPYEYIGFDLITL--PPT---  
 DFGNKYVM-VMIDFFSKFAYCEPLKSR-NSSYLLSKFRN-IF--KNPFFPKMVVLDNAREHSE-----LAKFMTNN-  
 NIEPHFTPPRHPSSNGQVENFNRTLKSRRAK C-----KYENWDLVLQEILHDINASEHSV-T-----  
 KKSPFFIQSGAECPHNIFD  
 >DpCIN1  
 F-----VQKGINDTWQIDL VEMI-PFYK---EKGYRYLL-  
 TVIDTFSKFAYAVPVKSK-TALDVL SALKK-IL--KSKHKPKNIQSDQGEFFNVA-----FGELMKKI-NINHYHT-  
 YTHLKASICERFNRTLKNRMWKIF-----SMQ--GNHTWIYILHDLLKDYNN SYHRT-I-----KMRP-----  
 >DrCIN1  
 V-----VVGMDTQFQADLVDMT-AYSTE--NDGNKFML-T-  
 IDVFSKYAWSRVLKNK-SGVEVTKAFES-IL--EEGRVPRKLTQDQGEFFNKH-----FQDLMKKH-DINH FAT--  
 ATDLKASVVERFNRTLKSRMWRFL-----TAT--NSRRYINVLQDIMTYNNSYHKT-I-----KMRP-----  
 >SmCIN1  
 Y-----KTMGVDDLWQMDL MEMI-PFSKI--NKGYKYIL-  
 TCVDIFSRFARAIPKTK-SANEMAEAIKE-LF---IDGKPRNLQTDLGKEFYNSK-----VREIHK---GINHYSV--  
 FSQFKAHVVERFNRTLDRLLK KYF-----VYK--GNKTWINVLQKAIYSYNYSRPHGLN-----GMRP-----  
 >ApGINGER2a  
 YDTHSAIGHGGRNRMVSELKNNYC-NITNETIMVFLKLC AECHKKTVCS---KVGLAPK-PF-LQPTFNSRAQVDLIDMQ-  
 SQR----HNDYRFIM-NYQEHLTKYIVL KPLKSK-CAE EIAYNLID-IY--TLFGAPTILQSCSGKKFVTSI-----  
 INKLNVIWDEIKIDYGPWKHSESQESVERTNRDVQEMLSAWM-----TKK--DSL DWPSALKFIQFKK NRTFHSG-I-----  
 GTSPYEAMFGCTARIGYES  
 >BmGINGER2a  
 HDAHLATGHGGRNRLVKGINNKYK-NITTEAVMLYLSLCEACQKKGK-----KKGIAIK-P--TTAEMNSRCQMDLIDLQ-  
 TSP----DNEFKFIS-NYQDNL-NFVVLRLPLKTK-TASEVVKQLMD-IF--TLLGAPSS-NVINDREFANKI-----  
 IQELANMRDGVKIIHGKPRHSQSQSIERANQDVQNMITTWL-----ITN--QTTKWS-----  
 >FeSCAND3  
 HNTHLSIGHGGRTRMEKELQAKYK-NITKEVIMLYLTL CGPCQKHSKL---KKVLTSK---PIKEVSSRCQVDLIDMQ-  
 LNP----DGEYKFIM-HYQDLR TKLSFLRSLKSK-RPKEVAHALLD-IF--TIIGAPSVLQSDNGREFSSQI-----  
 VYELSNIWPELKIVHGKPOPCQSQSSMNQTNDDIQKRIISWM-----QTN--NSSHWA EFLWFIQMIQNQPYHRG-M-----  
 QPNPFEGTFSSEAKPGLCH  
 >HsSCAND3



HNTLSIGHGGRTRMEKELQAKYK-NITKEVIMLYLTLCKPCQKNSKL----KKVLTSK----SIKEVSSRCQVDLIDMQ-  
 LNP----DGEYRFIL-HYQDLCTKLTFLRSLKSK-RPTEVAHALLD-IF--TIIGAPSVLQSDNGREFSSQV-----  
 VSELSNIWPELKIVHGKSTCQSQSSAEQT-EDIRKRIFSWM-----QTN--NSSHWTEFLWFIQMSQNPYHRS-M-----  
 QQTPCESAFSSEAKLGLSH  
 >MeSCAND3  
 HDTHLNIRHGGGRTRMEKELQPKYH-KRGYNVI--FNSLQTLSAKEFKVT---KKCIVSK---PIKEVNSRCQVELIDMQ-LNP-  
 ---DGEYKFIM-SYQDHQTKLSFLRPLKSR-RCEEVAHALLD-IF--TIIGAPSILQSEHGRDILSQL-----  
 VNELNMMWSKLVHGKPRPCQGHGSVVPKEDIQNMISWM-----QKN--SSLHWSEGLWFIQMMKNRPFHRD-T-----  
 QHSPREIVFDEKST---  
 >HsKRBA2  
 HDTHLSIGHGGRTRMLKELQGKYG-NVTKEVIVLYLTLCKQCHQKPNVP---KRGLAPK-PM-TFKDIDSTCQVEILDMQ-  
 SSA---DGEFKFIL-YYQDHSTKFIILRPLRTK-QAHEVVSVLLD-IF--TILGTPSVLSDSDSGVEFTNQV-----  
 VHELNELWPDKIVSGKYHPGQSQGSLEGASRDVKNMISTWM-----QSN--HSHHWAKGLRFMQMVRNQAQFDVS-L-----  
 --QQSPFEAMFGYKAKFGLYS  
 >BtKRBA2  
 HDTHLNIGHGGRTRMLKELQGKYG-NVTKEVIVLYLTLCKQCHQKPNVP---KRGLAPK-PM-  
 PCKDNDSRCQVEILDMQ-SNA---DGEFKFIL-YYQDHLTKFIILRPLKAK-QAHEVVSVLLD-IF--  
 TILGPPSVLESDSGMEFTNQV-----VNELNEVWPDKIVLGKSHPGQGGFLERVS RDVK TMLSAWM-----QSN-  
 -HSHHWTEGLRFMQMVRNQAQFDGS-L-----QQSPYEAMFGCKAKFGLYS  
 >LaKRBA2  
 HETHLNIGHGGWTCMLKELQGKYG-NVTKEVIVLYLTLYKQCHQKPNVP---KKGLVPN-ST-  
 TLKDVNSRCQVEILDVQ-SNA---NAEFKFIILCYQDHLTTFIILXPLKAR-QVHEVVSVLLD-IF--  
 IILGTPRVLESNSGIEFTNQ-----VNEVSEVWPDKNIVSSQYHTGXGQGSKEQXNEDVQNTMSARM-----QSN-  
 HSHHWTEVLXFPMPVGNQVFNVS-L-----HQS----LQCKVTGLYS  
 >HmGINGER2-1  
 CQN---GLHLGALKTYKIIIEGYA-NIARKAVEIFISFCPTCNLNRQL---KKAPLQPI---ISTGFLQRLQIDLIAME-SKP---  
 DKEFRYIG-HVVDHFHFKFHLFPMRNLK-TALETANLKR-VL--SYFGLPAILHSDNGSEFVNDV-----  
 IKSLLLTWPKTQIVNGSPRHSQSQGLVEQGNFTIERLISSRE-----YDS--GQSNWSEWLVEIQCKFNV-----  
 -----  
 >Zeco1  
 HKQ---FGHASADRLQRLMHSSCF-----AILQQIVDDCEICKKYKRTK-PKPAVGL---P--MASEYNETMAVDLHELE-PSI---  
 -----WYL-HIIDHFTRFSAGSIVKTK-KSSEIVNSFIH-WI--SVHGAPQKLYSDNGGEFNNQE-----IRDMAENF-  
 NIEIRTTAGYSPWSNGLLERHNQTLTEILKV-----KE--NGCDWHTALDWALMAKNSMLNVH-----GYSPYQLVFG---  
 -----  
 >I731  
 HKR---NGHLNNTSSLQEMVRKKMVY-GVEKVVFKPDAVCKTCMLAKIHV-QPFPKTRRS-----  
 RAEELLDMIHSDLCGPFSTPS---LAGSKYFL-TFIDDKSRRIFVYFLRKKDEVFTKFEVFKK-  
 LVERQTGRKIKCIRSDNGGEFVNNV-----FDDYLKAH-GIARQLTIPHTPQQNGVAERANRTL VEMARCML-----  
 LQSELGEALWAEAINAVYLRNRSTSRALQ-----SKTPMEEWTG-----  
 >Tnt-1  
 HKR---MGHMSEKGLQILAKKSISY----AKGTTVKPCDYCLFGKQHR-VSFQTSSE-----RKLNILDVYSDVCGPMEIES--  
 -MGGNKYFV-TFIDDASRKLWVYILKTKDQVQVQFQKPHA-LVERETGRKLRKLRSDNGGEYTSRE-----  
 FEEYCSSH-GIRHEKTVPGTPQHNGVAERMNRTIVEKVRSM-----RMAKLPKSFWGEAVQTACYLINRSPVPLA-----  
 FEIPERVWTN-----  
 >Vitico1-1  
 HLR---YGHLNVKGLKLLSKKEMVFGL---PKIDSVNVEGCIYKQSK-KPFPKGRSR-----RASSCLEIHHADLCGPMQIAS--  
 --FGGSRYFL-LFTDDHSRMSWVYFLQSK-----VLRTDRGGEFLSND-----FKVFCEEE-  
 GLHRELTPYSPEQNGVVERKNRTVEMARSM-----KAKNLSNHFWAEGVATAVYLLNISPTKAVL-----  
 NRTPYEAWYG-----  
 >SIRE1-4  
 HQR---FGHLHLRGMKKIIDKGAV-RGIPNLKIEEGRICGECQIGKQVK-MSHQKLQHQ----  
 TTSRVLELLHMDLMGPMQVES---LGKRYAY-VVVDDFSRTWVKFIREKSETFEVKELSL-  
 RLQREKDCVIKIRSDHGREFENS-----LTEFACTSE-GITHEFSAAITPQQNGIVERKNRTLQEAARVML-----  
 HAKELPYNLWAEAMNTACYIHNRTVLRRT-----PTTLYEIKW-----  
 >Copia  
 HER---FGHISDGKLEIKRKNMFSQDQLLNLELSCEICEPCLNGKQAR-LPFKQLKDKT---  
 HIKRPLFVHSDVCGPITPVT---LDDKNYFV-IFVDQFTHYCVTYLIKYSDFSMFQDFVA-  
 KSEAHFNKVVYLYIDNGREYLSNE-----MRQFCVKK-GISYHLTVPHTPQLNGVSERMIRTTITEKARTMV-----  
 SGAKLDKSFWGEAVLTATYLINRIPSRALS-----SKTPYEMWHN-----  
 >pCretro6  
 HRI---LGHASLASIKRLCLGLA--EGVDVDMTSDQFCESCVRAKQHV-QPFPDQATRT-P--  
 DKLKVGIVASDTWGAQVRS---VHSFYFYM-SMTDLKSRFSGVYFSAQKSLAKMALTEFRG-

LIRRRGTSSIMCLRIDNGTEFINNE-----FLQYCKSQ-GIVVETTAPYSPAQNGVAERLNRTLRESARAML-----  
LAAELPRKFWPEAVSYACLKNRNLPHAAALK-----GMTPTYQALTG-----  
>Hydra1-2  
HEI---LGHCNYEKLQNVVK----GMITGKIDKSNLNCKICTQGKFVQ-SRNREPDT-----RAKAALELVHTDLGAPIDPEA---  
-KDGFKYAL-AFTDDYSGAVFVYFLKAKSDTARATEKFIA-DT--APYGRIKCVRSNGTEFTAKE-----  
FQSLLSKN-GIRHETSAPYSPHQNGTAERNWRTLFEARCM-----LESGLPKMLWTYAVMTAAVIRNRCYNSRIH-----  
QTPYYALTG-----  
>Koala  
HSR---LGHPAFPIVKRIVQSHKL--SCLDVESNNISVCDACQKAKSHQ-LPFGSLSTS-----EVHSPFELVYSDVWGPA-PTS---  
VGGKKYYV-SFIDAYSRTWIYLLKFKSEVFEKFHEFQN-HVERFFDRKIKTIQTDWGGGEY--QK-----LNSFFNKI-  
GILHHVSCPHTHQQNGSAERKRRHIVEVGLSLL-----AHAFIPLKFWDEAFSSAVYLINRIPTKVLQ-----YRSPLEQLYN--  
-----  
>CoDi6.3  
HCA---LGHPCEATTRATAKAFV-----RLIGQMKPCKDCALSKAKA-KKISKVPVK-----RASKPGGRLCIDISSPS-TKS---  
VGGKCHWL-LVVDDCTDYAWSFFLNKKSETNDIMIALIK-LK--QYDIDVKTIRCDNSGE--NNA-----  
LQRSCKQE-GITFEYTAPNTPQQNGRVERFRPTLYGRVAML-----RDVSVSKRLWAEANTATDLDNMLLKQG-----  
ETTNSFHKFFG-----  
>Ty1B  
HRM---LAHANAQTIRYSLKNNTYFNESDVDWSSAIDYCPDCLIGKSTK-HRHIKGSRLKYQ--  
NSYEPFYQLHTDIFGPVHNL-----KSAPSYFI-SFTDETTKFRWVYPLHDR-REDSILDVFTT-IL--  
AFQASVLIQMDRGSEYTNRT-----LHKFLEKN-GITPCYTTTADSRAHGVAERLNRTLDDCRTQL-----  
QCSGLPNHLWFSIAIEFSTIVRNSLASPK-S-----KKSARQ-----  
>Ty4  
HKR---MGHTGIQQIENSIKHNHY--EESDLIKEPNEFCQTCKISKATK-RNHYTGSMNNHS--TDHEPGSSWCMDIFGPV-  
SSS---ADTKRYML-IMVDNTRYCMTSTHFNK-NAETILAQVRK-NI--QFDRKREINSDRGTEFTNDQ-----  
IEEYFISK-GIHILTSTQDHAANGRAERYIRTIITDATTLL-----RQSNLRVKFWEYAVTSATNIRNCLEHKS-T-----  
GKLLPKA-----  
>ISSc  
W-----QVERPGALWHGDVCHVT-GCT---VGGPLRIH-  
GLLDDASRYVVALEAHTTEKEIDMLAMTVD-AL--RRHGKPDALYLDNGSTYRGDV-----LKTACARL-  
GITLLHAKPYDPEARGMERFWRTLREGCLTYL-----GAVAINTLRA---FLDRRYHPAPHAGLL-----GQTP-----  
-  
>ISaf  
F-----AYDQINELWQGDLSHGP-TIR---VNGKTFLI-  
AYIDDCSRFVYPYAQFFPS-EKFDGLRIVTK-AV--LRCGKPKRIYSDNGKIYRSEV-----LQYACAEM-  
GITLIHTQPYDPQSKGKIERFFRTVQTRFYPLLELDPKSLLELNERFWR---WLEEEYHRKPHASLD-----GKTP-----  
---  
>ISLa  
FER-----SRPNQMWQTDIFSFR-----LGGAAYLL-  
AFIDDYSRYMVGLGLYRRQTAENLLEVYRR-AT--GEYNCPAEMLTDNGRQYGTTR-----FEKELKGD-  
RIKHRSQPHHPMTLGKIERFWKTIWTEFLDRCQFD-----CMETAQQRITLWIKYYNHRPHQIG-----GLCP-----  
-  
>ISTv1  
Y-----WALSPNLIWHADVHYFR-----GVRGQYIY-  
GIIDDFSRLVACIQIPDMLAATTANVAAS-AF--IEFGAPYCFWTDNGSE--NA-----FQDLLDLW-  
GVQWRHTDSHPYQNGKIERFWPTLERCQSIQ-----AIPAFIWEYNNTPHEDLT-----GTP-----  
>ISEc  
F-----YASGPNQKWAGDITYLR-----DEGWLYLA-  
VVIDLWSRAVIGWSMSPRMTAQLACDALQM-AL--WRRKRPRNVHTDRGGQYCSAD-----YQAQLKRH-  
NLRGMSAKGCCYDNACVESFFHSLKVECHFIS-----REIMRATVFNYIECDYNRRRHSWCG-----GLSP-----  
>CoDi6.7  
HHR---LGHASMTKIRMLAKVGLL-PASLKECQ--IPLCTSCLYGKATR-RPWRTKGSSTAS--  
KVNGPGQCISVDQLVSTTPGY---LRGYHAAT-VFVDNFSRLSYVHVQKGT-SAEETIQAKHA-YA--  
RSHGVVTKYHADNGI-FADNK-----FREA VKED-RQTLFCGVNAHFQNGIAERRIRELQDHARTML-----IHA--  
TSHLWPYALRMANELHNHPLSLR-G-----SVPIEIFA-----  
>ApBIN1j  
HIR---LLYIGPQGLLAHIHRKYWPIRGRSLARQTVHKCMICFRKPRM-LQPVMAPLPSVRD-TRCRAFERAGVDLCGPI-  
NIRSGL-RKVKHIA-VFVCMVTRAVIWSLFEIC-----LRMRS-FL--CYSGA-KKILSSWASDLKESK-----  
LNDQSEL-GIEWQFILPSAPHSGLWESAVKSAKQHLVKSS-----  
NGSLLTYEETSTLLCRNEAVLNSRPLTATSSDPDFNVLTP-----  
>Tas

HEE---LLHAGISSILAKMREAYWIPRGRQAIKRALNNCFHCRRWKSQPFQMPMPYPPEERV-SKHPPFENTGVDYIGPF-  
TIRSMK-RITQNDGS-VYSLVSQLELYISKSPLTPDQVSFSVYVR-FV--SRRGLPKRMLSDNGTQFVWAR---  
SVLTSVSKHQTDNAILDYCAAH-NIQWSFITPLVPWQGGIYERMVGPVKGSMKKT-----  
GWKRLTQEELQTLTTDIEAVVNCRPIIPLTSE--NTTVLRPVDLFLPHGNSSP---  
>Cer7  
HGK----YHTNEQQTMEATREKAWIPCLRRQVKKIIGKCVKCQRYNRAPMKYPNMADMPFRV-  
RRSRPFENTGLDYFGPM-TFRKEDGSTESCWGC-VLSCATTRLTHIELVQQC-STKAFINAIIR-FV--  
SERGIPDRIVSDNAPQFLGQILEVSARASKENALDKDILEYLGNT-SIEWSFITPYAPWQGGMYERMMSIKQAIYKSI--  
---GKNILTLDDLETVMKEVSGIINSRPLTYVTEGAG--TTICPKDFINPEMRMT----  
>Kobel  
HST---VGHLGRNSILAKVREKYWIYGASQLAKRVARSCVTCQRYHAAP-  
CEQVMAELPADRVVAEVSPTFCGMDYFAPL-TVRRGR-SEVKRYGV-IFTCFSSRAVHLEIAHSL-ETDACINAIIR-FM--  
ARRGPVRSIRSDNGTNLVGE---KELRHAEGLDQSRMNDVLCAE-GIEWHFNPPAASHFGGVWERMIRSIRKILYSLL--  
---REQPVDDDELSTLFCENIVNNRPLTTTSSDPNDLLPLTPNM-----  
>Tamy  
HRR---FCHANHATVVNELRQTYWILSLRDAVKKVLHQCQWCRTKMKP-  
QMPPTGDLPVERLRYGSHPTCTAVDYFGPM-FVTIGR-RKEKRWGA-LFTCLTTRAVHLELVPSTL-STSSMIMALRR-MS-  
-ARRGTPIVYSDNGTNGIFAN---HELREEIGLKKNELIDANQE-GIRWKFIPPGAPNMGGAWERMVRTVKTALSAIL--  
----NERSPPEEVLHTLLTEVEHTVNSRPLTHLSVNPEDEESLTPNHFLIGRSCGS----  
>Zebel  
QR----LLHPGSEVLAELRRQYWVLRGREAIRKHQHTCRDCQFWRAKP-  
QTPQMADLPSSRLQLYKPPFYSTGVDCFGPF-TVKVGR-RQEKRWGV-LYKCMTRCVHLDLLEQL-DTDAFLLSLRR-  
FI--ARRGKPMELCDNGTNFVGGD---RELRETFNAMAPK-LQEQLAEQ-  
RIRFRFNPPSAPHFGGTWEREVKSVKSALRVIL-----  
REQSVPEAVLQTLLEVEGILNSKPLGYISSDVADLDPVTPNLLLMGRRDAS---  
>Purbel  
HE----LGHHGVAVTAKTRRKYWILQGYRLAKTVKHRCVTCRAAECRR-  
ETQIMANLPSCLAPFTPPPHYTSCDYFGPY-LVKVGRNKKAKHYGI-IFTCLNTRAVHLEMATDC-STMEFLQALRR-FI-  
AVRGQPAQFLSDNGTQFVGAE---RELREMGVRSERELKDFCAEK-  
RVVWKVFTPGAPHQNGCAEAMVKSCFKALKRAI-----  
GEQVLTPELEYTCFLEVANLVNERPIGRVGNPDGGLYCPNDLLGRSSSK----  
>ApBIN1h  
-----LGCIAPVPLTQDINKLYLQVRRATGAAVNGSAPCVSASATP-----LRNRVDYAGPL-  
QMRELRLRVFKIYA-VFVCFITKAVHLEVVSDEL-STDAFFAAAFDR-FV--ARRGLPNEVFSDCGTNFVGAD---  
RQMRSLINSAEQAIGNARA---TCDWHFNPPSAPHFGGLWEVAVRSTKRLLRVI-----  
GNHIFTYEEFSTILARVEAVLNSRPLTPASTDPHDLCLT-----  
>Bel  
HVS---YLHTGVDATFTNLRQYWILGARNLVRKAVFQCKSCFLQRKGT-SNQIMGELPIPRV-QASRCFQHTGLDYAGPI-  
AIKESKGRIGKAWFS-IFVCLTTKALHIEVVSEL-TTQAFIAAFQR-FI--  
ARRAKPTDLYSDNGTTFHGGKKTDDMRRLAIQQAKDEELAGFFANE-  
GISWHFIPPSAPHFGGMWEAGVRSIKLHMKRIL-----GSKALTFEELSTVLTQIEAILNSRPLCPTGDN--  
SLDPLTPAHFLTGPSYTA----  
>Cer10-1  
HEI--NGHLPEQYTLKALTYWIPCLKALVRSVISNCKKCVFGLPYPYNTKQLPGCRT-EPSKPFKAVGLDYLGPI-  
EYLRDDQSIGKAYVL-LYTCLVTRAAVLRVVPDA-TTESYLMALRT-IF--HQVGVSEVHSDNGAKMTNDD---IREGSEI--  
--DEIFTCFLASQ-EIKFIYITPWSWQGGVYERIIIGLLKHQIHKIC-----  
GDQKLDFFSLQYVVSSAQAMINNRPLVAHARSNDMITLRPMDFMIPG-----  
>Pyggy  
HES-----HTRGEPKIDNLPFRFFWAHEDRSIRRYVRNCDVCEKTYRE-KVLRITNT-----RPDIEKEISIDFIKGL-PTS-----  
EGITYLI-VVTNRLSKGSIFILLPNI-KTETVVRAFLR-VV---AYYLLEAITSDRGS-FVS---V-----LERLCEIL-  
KIRRRLLISFY-LTNGSTERIN-SVEAYTRAFI-----SAQIDASLCSIAQIAINSRDATL-TGV-----

**Dataset S8.** IN alignment generated by PROMALS3D and used to reconstruct the phylogenetic tree in Fig. 4.

>ApGIN7a  
HDSLL-GGHAGVSR--TVKRLKLNYNWRHMKKDIKHYYKHCEICQKNKSHLKTTPML----ITSTI--  
VKPFKNCCLDIVGPLPK-TLTGNMYILTLQDELSRFLAIVLSTT---DAQT-VAQAFV-EVSYGIPESILTDRGTNFI-----  
---FDVFKSMCKLL-DIKKSKTTPWHPQGNCFLESHKTLKTYLRSFVDKD---SNWDKLLCYATFCYNTTVHTSTN-----  
FTP-----  
>Cer3  
HESLG-GGHFGYRK--TLHKIKRNYWPNMRSVDLKWTLQCKICQQRNPHSTRELQ---KIVIT--  
TKVFEKVGVDLTGPLRM---TASGNKYMVCWFTKFKVISVPLPNASTETVAD-AMMKEL-LLKFGTSPQLVSDRASTFT---  
-----SEAFRAFCKRL-EIQQLAIPYHSGKNGATERTFRTFHNMVSKHVNKTH---TDWDQILPYMTFVYNTTVHDTTG-  
-----ETPFLLIFGRDPVFAIDK  
>Mdg1  
DDPSE-GGHSGISR--TLRKMKNCCCWPRMTKAISEYVETCLKCQQAQTTKHTKTPLT---ITETP--  
ATAFDKVLIDTIGPLPR-SENGNEYAVTICDLTKYLVTVPINPKSAKSVAK-AIFENF-ILKYGPMKTITDMDGTEYK-----  
-----NQIIDLCKYM-KIKNITSTAHHQTLGTVERSHRTFNEYVRSYISVDK---TDWDIWIQYFTYCFNTTTPSVVHE-----  
YCPYELVFGRLPRQFIDF  
>DrGIN2-2  
HFNDI-GHHLGQKK--TVHRIQSKYYWLGIVKDVVDWIKVCETCQHAERSKNLARTV----RPIKV--  
DGPWEILAIIEIGPFGTVHGGNTHIVITDYYSKWVEAFPVQKDKGLCVA--RCISSV-VCRFGPSKTIFCSQNADFC-----  
-----EVMKQLCERW-NITVRVLSVDQPQRNALYDRSCNLLRDTIKQMVVEKQ---VEWDDFLDPLAIFRTSVNPTTK-----  
--FTP-----  
>Tat4-1  
HEGAG-GNHSGGRS--LAAKIKKHQYWPTMITDCIRFVAKCEPCQRHASIIHSPTEAL---TTSTA--  
PYPFMRWAMDIVGPLPS--SNGKRFMLIMTDYFTKWVEAEAYNKIQAGEVQR-FVWKNI-ICRHGLPYEITDNGSQFI----  
-----SRQFEDFCAKW-RIRLNKSTPRYPQGNQAEATNKIILDGLKKRLEAKK---GAWADELD-GVLSHRTTPRRSTG--  
-----ATPFSLYGIEAMAPAEV  
>Gmr1  
RDALL-GAHLGMDK--TRERVVARFYWPGVRRDVARYCQECPCQVRPRPRAVERSPLI---PMPII--  
ETPFERIALDIVGPLPR-TSRGHRYL VILDYATRYPEALPLRAA-TSKAY--ARISAT-LSRVGLPKIETDQGSFCM-----  
---SRVVKELKLL-QVSLRQRTSVYHPQTDGLVERFNQTIKRLKKSIEADG---KNWDQLLPHVLFVLAIREVPQASTG-----  
FSPFELLYGRRRPRGILDL  
>SURL  
-----GHLGIEK--CKKRAREVIYWPRINADIAEMVQSCSCLMYKPKQAESLH----PHAVP--SRPWEKVAVDLFTL-----  
NKREYMVIVDYYSQFIEVCTMTSTSSKAVI--NHMKAI-FARHGTPCELMSDNGPQFA-----SQEFKSAKEW-  
DFHHTTSSPHYQSNGLAENAVKIVKNLLLS-----QHCGQDIHRALQVYRSSPL-ACG-----  
KSPAELLYNRRRLRSNLPM  
>HmGINO1  
HNDAG-GAHQGIVR--TQNKIKNLYWMSITSVVEAWIKTCKQCQSFEEKIATPQL----HPIQV--  
TERWAVLGVDLIGLPLPE-TVNGNKYVL TITDLFTKWVVARVLPDKSAAAVA--TALVNN-FHTYGPPKKVITDQGREFV--  
-----NEVKTIFQLM-GIKHSVTSAYHPQSNQDERTNQTFCALSKYTNEM---  
NDWDRFSSXIAYGLNISCQKSTK-----VTP-----  
>HmGINA1  
YDSNH-AAHVGLNN--TRAKLKGsfyWLGmVNDITKCVKECDKCQRMEKIRTIAPEL----KSIKV--  
NGLWDFLGIDLIRPLPI-TKLGNKYIL TITDLWSKYIEAFPIPKPAFYVS--KCLTTL-FYRFGPPKKILSDQGREFV-----  
---NSLNEQLFFLF-QIKHLITSAYYPQTIGQDERTNQTIKKSLKSLSDNTQ---DNWDELLEAVLFGRLTCVQKSTK-----  
FTP-----  
>HmGINNY1  
-----GGHFGGRDK--TLAKISERYWKGmVNDVRSFCKYCDKCQRANRFEKHSael----HPIKV--  
DEVWSTVIGIDLIGLPL-TEKGNKYIITATCLFSKWPEAASLSDKTATSAA--EFLYTC-FTRHGCEVQISDQGREFV-----  
-----NEVNHELKMM-GTKCNVTSAYHPQSNGEDERFNQTLQRQLLYVDEKQ---NTWDLVIESILFSYRVSVQDSTK--  
-----QTP-----  
>HmGINGER1  
-----ASHLGINA--VRKQISSRFWHSIVEDITKHVAQCERCQKTSNRNLKVSP--ALK-PVKVE--QQVMKQVGVLDLIKPE-  
--SNGFNAYIVLIDYFSKWTEAEPLIDKTAVSVA--AFLYRV-ICRHGCFQIQINDQGREFV-----NSVSIALHDMS-  
GVQQRVTSAYHPQANGLVERQNQTIKKAIVKVLNENV---KSRASVLDGILFALRVKVQDSMG-----YSP-----  
>HsGIN1  
HENDS-GAHHGISR--TLTLVESNYYWTSVTNDAKQWVYACQHCQVAKNTVIVAPKQ----HLLKV--  
ENPWSLVTVDLMGPFHT-SNRSHVYAIIMTDLFTKWIVILPLCDVSASEVS--KAIINI-FFLYGPPQKIIMDQRDEFI-----  
---QQINIELYRLF-GIKQIVIS-HTSGTVNPMESTPNTIKAFLSKHCADHP---NNWDDHLSAVSFAFNVTHTLEPTK-----  
NTP-----

>RetroSor1  
HSGMC-GSHIGPRA--LSAKALRQFYWPTHIRDAEEIVKTCKACQTFSPIQSGPSALT----QLIPA--  
SWPLQRWGM DLVGPMP T-AQGGNKFAVVAIEYFTRWIEAKPLTTITSETI-RKFFWQNI-VCRFGVPRLLTVDNGKQFD---  
-----SDNFKEFCHLI-GTKIAFASVYHPESNGAVERANRTIFSAISK TLLNLR---GKWVEELPRV VWSHNTTVSRATG---  
-----FTPFKLLYGEEAMLPEEI

>Kabuki  
HN----LSHPGIRT--TRKMITNTFFWPNMNDIGMWA KPCIRCQESKIYRHTISDL-----GNFVD--AGRFEHIVDIVGPLPT-  
SPQGRYCIITIDRCTRWP EAFPVHDITADKV-AKTIYDGW-ITRFGCPVRITSDQGRQFE-----SNLFLKLT KLL-  
GINKICTTPYHPQSNGAVERWHRSLKVALMTRLND-----TSWVDELSTAMFGLRASVRTDSG-----  
VSAAQLTYGKNIRLPGDF

>Tor1  
HL----PGHARTTN--MLGSMRDTVIFPKMAKKIKQKIMTCPTCLATGSTERPRFTPI---TPPKE--SHPYMTVTVDLLGPLPS-  
TPTRKKYILAAIDNLTRWIELRCIPDKTAAHVA--KALMDI-FFLRGPPRAVSCDNGREFS-----NTLLRELLASF-  
GTCINYGTYPYRPGQGLIERANREIVKHLKGLNIEE---HKWDTFIPSIQLSMNLTYHSALG-----  
SSPFQAMHGWT LAEPLFS

>Tor2  
HDL---KGHLGVDR--TAQFLSW-CWWPHKMDDIRTYVASCANCLKQKGYDMQPSRP-----HLYRA--  
TRPHEIHYCDFITLPTS-SRSGKRHALTVMCGFSRWLQVYAVHRCRSIDAA--RGLMNY-FLQFDFPRTLSSDRGRHFE-----  
-----NELLADLCKLL-QIRQNLHCAYRPESSGVIERCHKTLKSSLWAMVRDNP---LDWELALPSVVSAMNRSTNAATK--  
-----VSPYKCIFGRDPSFNGLA

>Mdg3  
HNE---LGHVGRDK--MIEAIMKNYWFNPKQK CSTHISNCLKCISFSPKTKGTEG--FLH-NIPKG--  
NKPFEIHHIDHYGPVDL--ARPKKHILVIVDAFTK FVRLYATKTTNTK-EVI-QSLNDY-FRAYS RPKCIISDRGACFT-----  
---SGDFDSFLKEC-NVKHIIATGSPQANGQVERINRSLGPMISKLIEPDQG--LHWDLVLEKVEYTLNNTLHRSIK-----  
QYPSIMLFLGQQKGQIMD

>Woot  
HQL---LGHFGATK--VYNSMKREYYWPNMYRTIKRRLRSCDLCQKTKSSNRPHQGPL---TPILY--  
DHIGDLVCVDFYGPLPT-GRLGASYV FVIDVFSKFLKLYPLRKATAK-IAA-KRLIED-FSGYIKPKCVLSDHGTQFI-----  
-----SNTWQNSLRAA-DIQPTLSSIRHPESNP-SERVMRELGRIFRAYCRENH---ASWVNHL SNIEDCLNYVPHISTG-----  
FSPYEILYGRTPPNPLDA

>ApGIN4c  
HDY---YAHTGPLK--TAHALKNICYFPSFNKTIRCI VQACELCQKCKPKTTRIAGPL---QPILS--NQPLDKLLVDFYGPLPT-  
GIFQFSYIFVVDNFTRFVKLYPLQSANAK-ICI-KKLT TDYFPPNYGIPKNIVSDHGRQFI-----SNYWQTS LKKY-  
KVQVSHTSVYHPQSNP-AERVMRELGRMFRTYCHEQH--SLWPQYVPIEWTLNVRHESTH-----NTP-----

>CRM  
HGGGL-MGHFGAKK--TEDILAGHFFWPKMRRDVVRLVARCTTCQKAKSRLNPHGLYL---PLPVP--  
SAPWEDISMD FVLGLPR-TRKGRDSV FVVDRFSKMAHFIPCHKTD DATHIADLFFREI-VRLHGVPNTIVSDRDAKFL---  
-----SHFWRTLWAKL-GTKLLFSTTCHPQTDGQTEVVNRILTSTMLRAVLKKNI---  
KMWEDCLPHIEFAYNRSLHSTTK-----MCPFQIVYGLLPRAPIDL

>Del  
HRSKF-TIHPGSTK--MYRNLKINFWWSGIKREVVEYVSRCLICQVKADHHHHSGLL---QPLPV--  
SEKWEHILMDFIIGFPS--KRCHDSIWVIVDRFTKSAHFIPHTTISGKDLA-LYKEI-IRLHGIPPTIVDRDTKFT-----  
SRFWGSLKSL--GTELFFSTAFHPQTD-GSERTIQILEDMLRSCSLDFK---GNWEEHLPLVEFAYNNSYQSSIG-----  
MAPFEALYGRPCRSPTCW

>Galadriel  
YDSAW-AGHPGVER--MLALLSRVYFWPKMEDDIEAYVKTCHVCQVDKTERKKEAG--LLQ-PLPIP--  
ERPWLSVSMDFISGFPK--VDGKASIMV VVDRFSKYSVFIAAPELCSSEVA AELFYKHV-IKYFGVPADIVSDRDTRFT-----  
-----GRFWTALFNMM-GTELKFSTANHPQTDGQTERINHLL EYLRHYVTASQ---RNWVELLDTAQFCYNLHKSSATE-  
-----MSPFEIVLGKQPMTPLDV

>Amn-san  
HSSKQ-AGHPGSEK--TLELLRRLVWVPTIRKDVRDFVA ACTVCATTKASHSRPCG--LLH-PLPIP--  
SRPWTHLGMDFIVELPP--SCGNTVIWVVIDRFSKMAHFIPRLKLP SAVEDLAHLFIQHI-FRLHGFPVEIVSDRGSQFV-----  
-----SRFWRSLCKSL-GVSLQFSSAYHPQTNGAAERVNQALEQFLRNHVSLCQ---DDWSDLLPWA EFAHNASHSSTG---  
-----RSPFLSVYQGHPLAFPQD

>Sushi-ichi  
HSSCF-ACHPGVRR--TAEFVQRRFWPNLQEDVREFVGACTVCARSKASHRSPAG--LLH-PLPVP--  
SRPWSHVALDFVTGLPV--SQGNDTILTIVDRFSKGVHFVALPKLP SAAETAELLVSHV-VRLHGIPLDVSDRGPQFT-----  
-----SRVWQAFCKGI-GATVSLSSGYHPQSNQAERANQAMEAALRCVTTSNP---  
ASWSKFLPVVEYSLNAMESSATG-----MSPFQCFLGYQPPLFPQQ

>Reina  
HDSPI-GGHSGFPV--TYHRIKLFYWAGMKGQIKEFVQSCEICTKAKADRNRYPG--LLL-PLPIP--  
DQAWQVISLDFISGLPT--SRRFNCILVVVDKFSKYAHFLAMSHPTALSVAKLFLSQV-YKLHGLPLSIISDRDPIFT-----

----SNLWQELFKLV-GTKLCLSSAYHPQSDGQTEWVNQCVEAYLRCFVHGCP---KQWSNWLSLAEFWYNTCFHTALG--  
 -----QSPFEVLYGHTPSQLGLS  
 >Maggy  
 HDSPV-AGHPGKAK--TYDLLSREYYWPGMLHYVSLVWKKCQTCRRINPSREGHQG--LLR-PLPTP--  
 ERSWQHLSDMFITHLPQ--SNGHDAILVVVDRLTKMRHFVPCCKGTCNAEDTANLYLHHV-WKLHGLPLTIVSDRGTQFV-  
 -----SKFWKHLTTRL-KIDSLLSTAHPETDGTQTERFNASLEQYLRAVAYLQ---  
 DDWESWLPLAEFTANSHKSETTG-----TSPFYATYGFHPRMGFE-  
 >Skippy  
 HAHPL-HGHQGVTK--TMKRLQELGYRHFKKGQVEKVIKQCDLCAKTKAQRHKPYG--QLQ-PLPVA--  
 QRPWDSITMDFITKLPT--GIFYDSIMVIVDRLTKFSYLLPYREATDAEELSYVFYRHI-VSIHGLPTEILSDRGPTFA-----  
 ---ATFWQSLMARL-GLNHRLTTAFRPQVDGQTERMNQVLEQYLRCYINYEQ---NDWVEKLPILAQLAYNTAYNESTK---  
 ---LTPAYANFGFTPNAHYNA  
 >TF1  
 HEEGK-LIHPGIEL--LTNTILRRFTWKGLRQIQEYVQNCHTCQINKSRNHKPYG--PLH-PIPPP--  
 ERPWESLSMDFITALPE--SSGYNALLVVVDRFSKMAILPCTKSITAEQTARMFDQRV-IAFYGNPKIADNDHIFT-----  
 -----SQTWKDFAHKY-NFVMKFSLPYRPQTDGQTERTNQTVKLLRCVCSTHP---NTWVDHISLVQOSYNNAIHSATQ---  
 ---MTPFEIVHRYSPALSPL  
 >Diaspora  
 HSSAP-GGHLGVQR--TARKVLDCFYWPTIFKDAWKICSTCEQCQRAGNTLTWRQQ--MPQ-QPMLF--  
 CEVFDVWGIDFMGPFV--SFGYVYILLAVDYVSKWVEAKPRTNDKVVAD-FVRSNL-FCRFVGPKAIVSDQGTHFC--  
 -----NKTMHALLKNY-GVVHRVSTPYHPQTNGQAEISNREIKRILEKIVQPSR---  
 KDWSTRLDDALWAHRTAYKAPIG-----MSPYRVVFGKACHLPVEI  
 >Athila4-1  
 HGSAY-GGHFATFK--TVSKILQAFWWPTMFKDAQEFVSKCDSQRKGN-INRRNE--MPQ-NPILE--  
 VEIFDVWGIDFMGPFPS--SYGNKYILVAVDYVSKWVEAIASPTNDKVVVK-LFKTII-FPRFGVPRVVISDGGKHFI-----  
 -----NKVFENLLKKH-GV-----KQVEISNREIKTILEKTVGITR---KDWSAKLDDALWAYRTAFKTPIG-----  
 TTPFNLLYGKLCPLPVEL  
 >ApGIN3c  
 -----MVE--YESIARSYFWWPSIDKEIEDMARNNECINARPNPPKSVLT----PWKWP--QRQWTRVHCDFLGPY-----  
 KNKTFLIIVDATTKWLEVFQVNSMTAQTVI--TKLSEL-IARFGIPRTITDNDKCFN-----GDEFQSYCKTL-  
 GIRHLTGAPFHPASNGFAESGVKIVKQFFNKC-----STSLHHLNKFLLMYRNTVHSTN-----ETP-----  
 >Mag  
 HD----PHMGIVK--TKSLARSYVWVWPGI-DEAETECRACTVCAAVADAPSTHAPR----SWPWP--SRPWSRLHLDLFLGPI--  
 ---GGVTYLVVVDSCSKWIEAIKMQRRTAQAVI--SVLRDL-WSKFGLPKQTVSDNGPPFS-----SSDFQKFLIHN-  
 GIKHIYSAPYHPASNGAAENAVKICKRAIKKALKQN---LNVDALCRFLLAYRNTEHATTG-----  
 DSPANILQGRSLRMLDN  
 >SPM  
 HQ----EHTGIVR--MKAVARSYFWYPKLDADIEKLSQSCEACLRMRNDPPKVPFV----PWSNA--RKPWERVHVDFFELE-  
 -----GKDYLVLVDITYSKWVNVELMTSTTSAKTI--ETLRSW-FAIFGLPETLVSDNGPQFT-----SEEMEVFLSKN-  
 GVKHVLVPPYHPASNGAAERTVQIVKRTLQKYFLSDK---VSIRHRLDNFLFSYRTPQTVTG-----  
 VSPYELVFKFAPRTRFSL  
 >Cer4  
 HE----GHPGVVR--MKQKACSFVFWTGIDKDVEKLVRCENCQESAKMPRVAPLR----PWPEP--  
 QKAWSRVHIDFAGPV-----NGHWFLVIVDAKSKYAEVKMTKTISASATV--SLLEEV-FATHGYPELLVSDNGTQFT-----  
 -----SNQFKLMCQEY-GMEHKTSAVYYPRSNAAERFVDSLKRGLAKITRSG---VVTQQALNKFLICYRNTPHSALA----  
 ---ATPAECHFRKIRTKMSL  
 >CoDi6.7  
 HHR---LGHASMTK--IRMLAKVGLLPASLKECQI--PLCTSCLYGKATRPPWRT-ASTR-SIHKV--  
 NGPGQCISVDQLVSTPPTLKRYHAATVVDNFSRLSYVHVQKGTSAEETIQAKHAFAER-YARSHGVVTHYHADNGIFA-  
 -----DNKFREAVKED-  
 RQTLFSGVNAHFQNGIAERRIRELQDHARTMLIHATKDSHLWPYALRMANELHNHLPSLRGS-----VPPIEIFA-----  
 >pCretro6  
 HRI---LGHAHLAS--IKRLCLGLAEGVD-VDMTSDDQFQCESCVRAKQHVQPPFD--QAT-RTPDK--  
 LKVGEIVASDTWGPAQVRSVHSFYYYMSMTDLKSRFSGVYFSAQKSGLAKMALRGLIRR-MSRTGSSIMLRIDNGTEFI-  
 -----NNEFLQYCKSQ-  
 GIVVETTAPYSPAQNGVAERLNRTLRESARAMLLAELPRKFWPEAVSYACLIKNRPLPHAALK-----MTPYQALTG----  
 ----  
 >BFV  
 HDGPG-SAHLGRSA--LLLKLQKQYWWPRMHIDASRIVLNCTVCAQTNSTNQKPRPPL----VIPHD--  
 TKPFQVWYMDYIGLPP--SNGYQHALVIVDAGTGFTWIYPTKAQTANAT---VKALH-LTGTAVPKVLHSDQGPFT---  
 -----SSILADWAKDR-GIQLEHSAPYHPQSSGKVERKNSEIKRLLTKLLAGRP---TKWYPLIPIVQLALNNTPNTRQK---  
 ---YTPHQLMYGADCNLPFEN

>EFV  
HKGGP-SGHLGKNT--MYIKILNKYWWPNLIKDISKYIRTCTNCIITNTDNPVNSYI---VQEKT--  
GLPFQKYMDYIGPLPP--SDGYHVLVIVDEGTGYTWLYPTKAQTANAT---VKALNH-LTGTAIPKVLHSDQGSFT----  
-----SATLVAWAKDK-GIQMEYSSPYHPQSSGKVERKNSEIKRLLTKLLVGRP---TKWYPLIPTVQLALNNTPNKIG--  
-----KTPHQLMYGVDCNLPFQD

>SFV  
HE----LAHTGREA--TLLKLQTTTHWWPNMRKDIITVLRQCKPCLQTDSTNLTPIPPV----SQPRP--VKPFDKFFIDYIGPLPP--  
SHGFSYVLVIVDARTGFTWL YPTKAPSTNAT---INSLNL-LLGTAIPKVLHSDQGSFT-----SATFAEWAKDR-  
SIQLEFSTPYHPQSSGMVERKNKEIKRLITKLLVGRP---TKWYPLPTVQLALNNTYSPRTK-----  
LTPHKLLFGVDGNVPFAN

>FFV  
HN---ISHAGREA--VLLKIQENYWWPKMKKDISSFLSTCNVCKMVNPLNLKPISPQ---AIVHP--  
TKPFDKFYMDYIGPLPP--SEGYPVHVLVVDAATGFTWLYPTKAQTSKAT---IKVLNH-LTGTAIPKVLHSDQGSFT----  
-----SEEFAQWAKER-NIQLEFSTPYHPQSSGKVERKNSEIKLLTKLLVGRP---LKWYNLISSVQLALNNTHVSTK----  
---YTPHQLMFGIDCNLPFAN

>MuERV-L  
HEQ---SGHGGRDG--GYPWAQQ-HGLPLTKADLATAAADQCQKPTLSPRYG-----TIPRG--  
DQPATWWQVDYVGPLPS--WKGQRFVLTGVDYTSYGYGFAFPARNASAKTT-IHGLTECL-IYRHGIPHSIASDQGTHTFT----  
-----AREVRQWAHDH-GIHWSYHVPHPHPEAAGLIERWNGLLKMQQLQHQLGGNS---  
EGWGRVLQKAVYALNQRSIYGT-----VSPARIHGS-----

>HERV-L  
HEQ---SGHGGRDA--GGYHWAQNQHGLPLTKADLATAAECPICQQQRPTLSPRYG-----TIPQG--  
DQPATWWQVDYIGPLPS--WKGQRFVLTGIDYTSYGYGFAYPACNASAKTT-IHGLTECLLIHHHGIPHSIASDQGTHTFT----  
-----AKEVWQWAHGM-GIHWSYHVPHPHPEAAGLIERWNGLLKSQLQCQLGDNT---  
QGWGKVLQKAVYALNQHPHYGT-----VSPARIHGSQT-----

>CoEFV  
HCG---IGHGGNNT--GKTLRRL-YWVWPLYTECKRYVANCPVCVNTPTTRPPNL-----RPPRG--ALFDKIF-LDFVGPLPR-  
-SNGYTAILILVESLSSFTWLLPCRDQSASTT-VTALSARF-FPASIEPKCFHSDQGGDFT-----SQLFKKMCSER-  
NIRVEYSTPHHPQSAGVVERKNRGLKAALT-KLVRNR---RKWFQVLDIVQTGLNNTPIARNE-----  
ATPFFLMYGQHMNTPLTN

>ApGIN5c  
-----YSTSDLKKIGKIMNNVTCILANRKQKKEG-----SIDKS--DTPLAMWHIDFLGPLTP-  
TPKGYRHILSVIDGFTKFCWLFPTKSVTAQEV--EKLTVM-EATFGNPGKIVCDRGTFT-----SKDFGDYCSGR-  
EIRHILITIGVPRANGQVERLNTIINVLTKLSLNT--DQWYRQYQSIKEAVELEYVRCHE-----

>Xen-1  
HG---PTHVSKNL--MNNLISKLYFAPGITTLTRNYTAACTICAQCNPGRMEKPP-----NLAKP--LYPFQRIQIDHIQMPR--  
CGRFEYVLVVDMFSGWPEAFPVANMTAKTT-AKKLLSEI-VCRYGVPEVIESDQGPVFT-----ASVTKDIWTAL-  
GVTLHFHTPYHPQSSGKVERMNGTLTKMLKMSQDSG---MLWPDSLPIALFSVRYTPRGVNN-----  
LSPFEILFGCAPRL----

>SnRV  
HL---YGHPSSEES--LRKVLTKRFVWEDMGQHCKEITNTCLTCAKYKVLRAAGPPMG----VGRSA--  
EGPCQKLQVDHVGPLGP-GTHGYRYLTTMVDVYTGWFVWAKPCRGPPTGATI--AALEEH-ISIWGVVPSIQSDNGTFT--  
-----SKAMQEWANTY-GIEWKVGAIYHPQSQKVERKHRLKDRLKATHEG---KNWVQALPSILLFINSM-  
HPRDQ-----FSAYELMTGRVPHL----

>MuLV  
HQ---LTHLSFSK--TKALLERNYYMLNRDRLTKDITETCQACAQVNASKSAVKQG----TRVRG--  
HRPGTHWEIDFTEVKPG--LYGYKYL VFDITFSGWVEAFPTKKTAKVV-TKKLLEEI-FPRFGMPQVLGTDNGPAFV---  
-----SKVSTVADLL-GVDWKLHCAAYRPQSSGQVERMNRITIKETLTKLTLATGS--RDWVLLLPLALYRARNTPG-  
PHG-----LTPYEILYGAPPPLVNF

>KoRV  
HQ---LTHLGPDK--LLQLVGRTFHIPNLQSVVREITSKCQVCAVTNAVTTYREPG----RRQRG--  
DRPGVYWEVDFTEVKPG--RYGNRYLLVFDITFSGWVEAFPTKTETALTV-CKKILEEI-LPRFGIPKVLGSDNGPAFV----  
-----AQVSQGLATQL-GIDWKLHCAAYRPQSSGQVERMNRITIKETLTKLALETGG--KDWTLLPLALLRARNTPG-QFG--  
-----LTPYEILHGGPPVVLASG

>FLV  
HK---LTHLSARK--MKTLEREFYLPNRDLHLRQVTESCRACAQINAGKIKFGPD----VRARG--  
RRPGTHWEVDFTEIKPG--MYGYKYL VFDITFSGWAEAYPAKHETAKVV-AKKLLEEI-FPRYGIPQVLGSDNGPAFI----  
-----SQVSQSVA TLL-GINWKLHCAAYRPQSSGQVERMNRISIKETLTKLTLETGS--KDWTLLPLVLYRVRNTPG-PHG--  
-----LTPFEILYGAPPMAHFF

>REV  
HR----ATHLGESK--LTELVRKHLYICGIYRAARDITTRCVACAQVNPAAAPVEKGL----SRIRG--  
AAPGEHWEADFTEMITA--KGGYKYL VLDITFSGWVEAYPAKRETSQVV-IKHLIHI-IPRFGPLVQIGSDNGPAFV----

-----AKVTQQLCEAL-NVSWKHLHCA YRPQSSGQVERMNRTLKETIAKLRKETGG---DWVSLLPQALLRARCTPG-REG-  
-----LSPFEILYGLKPPVVP--  
>Loki-Ofa  
HDSPV-GGHRGYRA--TLQTLQVAYWPLMARDTKSYVQGCLVCCQFQPSRPLGRAPL----QKRGV--  
TFPWSHLQVDWVGPVVK-SSRGNKYLLTVTCAFTKWVECLPAPNDTAMTT-ATLLLNHV-  
FSRWGLPLSVDSDRGTHFT-----SSVMTLYDIL-GVEVKFHSHHPQSSGQVERANRTIVSMLKKYVSSNG---  
KDWDVKLPLVLMAIRSTPHRSTG-----VTPFEMMTGREMTLPLHL  
>Loki-Aro  
HDEPC-GGHRGEQP--TIHMLWQVAYWFKIWTVDVKDYVNGCTICHKFQPVLP RHRAPL----QSAPS--  
AQPWSHIQIDWIGPVTR-STWGNXYALTITDRFTKWTCKLTALADTAETT-AVLLMKHV-FTHWGLPQSVSDSGGTHFT-  
-----ATIMEIEWKTL-GVKRQLHIA YQPQSSGQVERANQTVINMLKKQLDANQ---  
KDWDIKLPLVLMITXAMPSKATQ-----VSLFEMMTDRQIVLPLHL  
>Loki-Xla  
HDAPT-AGHRGEKI--TYELLRDYAYWPHMLQDVRTY CQGCLVCPQFQPGPNHRAPL----MKRGI--  
SMPWSDIQIDFIGPVTT-SSKGNRYMLTVTCLFTKWVECLPCKTCSSSVC-ASLLINHI-FSRFGLPQRIESDRGSHFT-----  
-----SEVMTKMWEIL-GVKRKLHIA YRPASSGGVERYNQSI VNILKKFKVESG---KDWDVKLPLVLMAIRATPSAATK-----  
--LSPFEMITGRKMVLPQHL  
>Loki-Xtr  
HDAPT-AGHRGEKI--TYELLRDYAYWPHMLQDVRTY CQGCLICPQFQPGPNHRAPL----MKRGI--  
SMPWSDIQIDFIGPVTT-SSKGNRYMLTVTCLFTKWVECLPCKTCSSSVC-ASLLINHI-FSRFGLPQRIESDRGSHFT-----  
-----SEVMTKMWEIL-GVKRKLHIA YRPASSGGVERYNQSI IINILKKFKVESG---KDWDVKLPLVLMAIRATPSAATK-----  
--ISPFEMITGRKMVLPQHL  
>Loki-Npa  
HDAPT-AGHRGEKI--TYELLRDYAYWPHMLKDVQTY CQGCLVCAQFQPGPTHRAPL----QKKGF--  
SLPWSDIQVDFIGPVTR-SSRGNKYMLTVTCVFTKWVECLPAHNNTAETC-ATLLINHV-FSRYGLPLRIDTDRGSHFI-----  
-----SEVMSKMWKIL-GVKRKLHIA YRPASSG SVERYNQSI VNILKKFKVESG---KDWDVKLPLVLMAIRATPSAATK---  
-----MSPFELMTGRKMVLPQHL  
>Loki-Rca  
HDAPT-SGHRGEKI--TYEILRDYAYWPHMLRDVKA YCQGCLICPQFQPASPTHAPL----QKRGV--  
CMPWSDLQMDFIGPVTK-SSRGNR YMLTVTCLFTKYV-CIPAPNNSDTC-AALLINHI-FSRFGLPQRIESDRGTHFT-----  
-----SEVMTKLWKIL-GVKRKLHIA YRPASSGGVERYNQTI VNILKKFKKETG---KDWDVKLPLVLMALRATPNTVTK---  
-----MSPFELMTGRRMVLPQHL  
>Loki-Pma  
HDEPC-SGHRCEMN--TGQMLRQVAYWPKMGEDIHKHVS NCLVCCKYQPTTSQHRAPL----QKRGT--  
DYPWSNLQIDWIGPVNR-STKGNKYMLTVTCAFSKWIECLPAPNNTAETT-AILLINQI-FSRWGLPSTIDSDKGSHFT-----  
-----AEVITEVWKML-GVKRQLHVAYHPQSSGQVERANRTIVSLLKKYVSTTG---  
RDWDTKLPLVLMAMRATPNRATG-----RTPFEIMTGRLMTPVHL  
>Loki-Lca  
HNEPC-SGHRCEMN--TGQMLRQVAYWPKMGEDVHKHVS NCLVCCKYQPTNSQHRAPL----QKRGT--  
DFPWSNLQIDWIGPVNR-STKGNKYMLTVTCAFSKWIECLPAPNNTAETT-ATLLVNQI-FSRWGLPSTIDSDKGSHFT----  
-----ADVIAEVWKT L-GVKRQLHVAYHPQSSGQVERANRTIVSLLKKYVSTTG---  
CDWDTKLPLVLMAIRATPNRATG-----RTPFEIMTG RQMTLPVHL  
>Loki-Dcl  
HDTPS-ARHHGTST--TYETLEQAAYWPSMQQDLAEYVKEFFPCYQFQPTKTNHRASL----QRRGV--  
TSPWSDLQSDWVGPLPR-STRGYKYFLTVVFQFTKWVECLPAPNDTAQTT-AYLLMNHI-FSRFGLPLRVNSDRGTHFT--  
-----AEIMQQTWKL L-GIARLHISQHP IASRQVERMNRTVVSMLRKFVSPNQ---  
KDWDVKLPLVLMAIRATPNEATG-----VSPFELMTGRQMTLPLHL  
>Loki-Lch  
HDEEC-GGHRADRA--TYETLKQVAYWPNMYQDVQDYTKGCLVCCR FQSSSPKHRAPL----QTKGI--  
TMPWSDLQIDWIGPVTR-SSRGNKYLLTVTCLFTKWIECLPAPNDT AETT-AMLLINHV-FSCWDLPMRIESDRGSHFT----  
-----GKVIENVWNTL-GVQRKLHVSHHPQSSGQVERANKTIVN ILLKKYISTSG---KNWDVKLPLVLMAIKATPNKSTG-  
-----VTPFEMMTGREMTLPLHL  
>Loki-Str  
HDEPC-GGHRGVKA--TCETLRQVAHWPHMEQDVARYVRGCLVCCQFQPTKPLHRAPL----QRKGV--  
SYPWSSIQIDWVGPVAR-SARGNKYLLTVTCAFTKWVECLPATNDTAETT-AVLLLNHV-FSRFGLPGEVSDRGTHFTS---  
-----AAVMTELWKLL-GVKAKLHIA YHPRSSGGVERSNQSI VRILRKYVAANH---  
KDWDKLLPLVLMAIRATRN RSTG-----MTPFEMMTGRQMTLPLHL  
>Loki-Lro  
HDAAC-AGHHGTRA--TYETLKQVAYWPGMQQDVAEYVKGCLVCCQFQPANPNHRAPL----QRRGV--  
TFPWSDLQIDWVGPLPR-STRGNKYFLTVVCQFTKWVECLPAPNDTAQTT-AYLLMNHI-FSRFGLPLKVNDRGTHFT---  
-----AEIMQQIWKL L-GIHAQLHISHHP ISSGQVERSNQTVVSMLRKYV SANQ---KDWDVKLPLVLMAIRATPNESTG-  
-----VSPFELMTGRLMTPVHL



>Loki-Tfu  
HDAPC-AGHHGTKA--TYETLKQVVYWPQMDDVTEYVKGCLRCCQFQPANPNYRAPL----QRRGV--  
TFPWSDLQIDCVGPLPR-STRGNKYFITVVCQFTKWVECLPAPNDTAHTT-AYLLMNI-FNRFGLPLRVNSDRGTHFT----  
-----AEVMQQIWKLL-GVKAKLHISHHPISGQVERTNRTVVSMRLKRYVAANQ---  
XDWDVKLPLVLMAIKATPQESTG-----ISPFELMTGRQMTLPLHL

>Loki-Oja  
HDLPS-SGHKGINA--TYSALKQIAFWPHMKKDVTDYVNGCLVCCQFQPTNPTHRAPL----QKKGI--  
SFPWSDIQIDWVGPLTK-SSRGNKYFLTVCFTKWVECLPAPNDTAQMT-ALLLMNHV-FSRFGLPMRVNSDRGTHFT--  
-----AEVMQQVWNTL-GVKANFHVSHHPQSSGQVERANRTVVNLLKRYVAASH---  
KDWDIKLPLVMMAIRATPHESTG-----TSPFEMMTGRQMTLPLHL

>Loki-Ame  
HDSPS-AGHKGIKE--TYRTLKQVAFWPRMREHVASIYKGLVCCQFQPANPLHRAPL----QRKGL--  
TFPWSDLQMDWVGPLTK-SARGNKYFLTVCFTKWVECLPAANDTAITT-ACLLVNIH-FTRFGLPCRVDSDRGTHFT--  
-----AEVMQQMWHVL-GVKAKLHVSYHPQSSGQVERANRTVVVILKRFVATHH---  
RDWDVKLPLVLMAIRATPHDSTG-----VSPFEVMTGRQMTLPLHL

>Loki-Sme  
HDSPC-SGHRGIKA--TLKSLQEVAYWPHMQKDVLDYIKGCLVCCQFQPASTLHRAPL----QRRGV--  
SFPWSDIQIDWVGPLTK-STRGNKYFLTVCFTKWVECLPAPNDTAQTT-AYLLMNIH-FSRFGLPGRVNSDRGTHFT--  
-----AEMMQQLWQLL-GVKANFHISYRPOSSGQVERANRTVVNLLRKYVSSNH---  
KDWDVKLPLVLMAIRATPHESTG-----LSPFELMTGRQMTLPLHL

>Loki-Sri  
HDSPC-AGHKGSKA--TYNALRQVAYWPQMRKDVADYIKGCLVCCQFQPANPVHRAPL----QRRGI--  
SFPWSDIQIDWVGPLTK-STRGNKYFLTVCFTKWLECLPAPNDTAQTT-AYLLMNIH-FSRFGLPSRVNSDRGTHFT--  
-----ADVMQELWQIL-GVKANFHISHHPQASGQVERANRTVVSVLKKYVTSNH---  
RDWDVKLPLVLMAIRATPHEATG-----FSPFEMMTGRQMTLPLHL

>Loki-Cne  
HDSPV-GHGRGYKA--TLHTLQVAYWPLMAND-----XRRGV--TFPWSHIQIDWVGVPVR-  
SARGNKYFLTVCFTKWVECLPAPNDTATTT-AVLLLNHV-FSRWGLPLSVDSDRGTHFT-----  
SNVMTALFEML-GVEVRFHISYHPQSSGQVERMNRRTVVNMLRKYVDSHA---KDWDVKLPLVLMAIRFTPQTSTG-----  
VTPFEMMTGRQMTLPLHL

>Loki-Sau  
HDTPV-GGHRYSKA--TLKTLQVAYWPFMARDTKLYVQGCLICCFQPSRPLNRAPL----QERGI--  
TFPWSHLQVDWIGPVPK-SSRGNKYLLTVTCSFTKWVECLPAPNDTAVTT-AVLLMNIH-FSRWGLPLSIDS DRGTHFT--  
-----SSVTTALYDIL-GVEAKFHIAHYHPQSSGQVERANRTIVNMLKRYVGSNG---  
KDWDVKLPLVLMAIRSTPHRSTG-----VTPFEMMTGRQMTLPIHL

>Loki-Bsp  
HDSPV-GHGRGYKA--TLQTLQVAYWPSMSKDVKIHVQSLVCCQFNPSRPLNRAPL----QKRGV--  
TFPWSHIQVDWIGPVPK-SSRGNKYLLTVTCAFTKWVECLPAPNDTAVTT-AVLLLNHV-FSRWGLPLSVDTDRGTHFT--  
-----SHVMTELYHIL-GVNVRFHISHHPQSSGQVERANRTIVQMLKRYVSSHG---  
KDWDVKLPLVLMAIRATPHRATG-----VTPFEMMTGRQMTLPLHL

>Loki-Ape  
HDSPV-GHGRGPQP--TLETLRQVAYWPSMSRDVKAYVKGCLVCCQFQPSRPLGRAPL----QKRGV--  
TFPWSHLQVDWVGVPVR-SSRGNKYLLTVTCAFTKWVECLPAPNDTATTT-AVLLLNHV-FSRWGLPLSVNSDQGTHTFT--  
-----SGVMTAMYDIL-GVKARFHIPYHPQSSGQVERANRTIVNMLKRYVNGSA---  
RDWDVKLPLVLMAIRSTPHRTTG-----ITPFEMMTGREMTLPLHL

>Loki-Pfl  
HDSPV-GHGRGPQP---XETLRQVAYWPSTNRDVKAYVRGCLVCCQFQPSQPLGRAPL----QKRGV--  
TFPWSHLQVDWVGVPVR-SSRGNKYLLTVTCAFTKWVECLPAPNDTATTT-AVLLLNHV-FSRWGLPLSVDSDRGTHFT--  
-----SGVMTAMYDIL-GVKTRFHIPYHPQSSGQVERANRTIVNMLKRYVNGSA---  
RDWDVKLPLVLMAIRSTPHRTTG-----ITPFEMMTGREMTLPLHL

>Loki-Pyo  
HDSPV-GHGRGTRL--LXSTLQVGYWPSMSNDTMSYVRGCLTCCQFQPSQPLNRAPL----QGRGV--  
SFPWSHLQIDWIGPVPK-SSRGNKYLLTVTCAFTKWVECLPASNGTAVTI-AVLLLNHV-FSRWGLSISIDS DRGTHFT-----  
-----SHVMTSLCKIL-GVEVRFHISHHPQSSGQVERANRTIIMLKRYVGSNG---KDWDIKLPLVLMAIRLTPHRSTG-----  
---VTPFEMMTGRQMTLPLHL

>Loki-Bpe  
HDTPV-AGHRGVQA--TYQALQVAYWPHMRKDVQEYTKGCLVCCQFQPSRPLHRAPL----HKRGI--  
TFPWSDLQIDWVGLLTK-SARGNKYILMVTCAFTKWVEGLPAPNDTAQTT-AFLLMNHV-FSRFGLPCKIDS DQGTHTFT--  
-----AAVMSELWQTL-GVKATFHISHHPMASGQVERTNRTVINILKRYVVSANQ---  
RDWDVKLPLVLMAIRATPNKSTG-----ISPFEMMTGRQMTLPLHL

>MmCGINI

HDSPI-GEHQGLD--TYKTVRLLGWWPQMVDHVRDYCRSCLFCIPRNLIGGELKV-IESP-WPLRS--  
TAPWSSLQIEVVGPIVTV-SEEGHKHVLIVADANTRWVEAFPLKPYTHVAV-AQVLLQHV-FARWGVPIRLEAAQGPQFA-  
-----RHVLVSCGLAL-GAQTTLSTRALQFPCLMSSEAYWEFKRALKEFIFLYG---  
KKWAASLPLLHLAFRASTTEATP-----  
>HsCGIN1  
HDIPL-GAHRPEE--TYKKLRLLGWWPQMVEHVVDYCRSCLFCIPRNLIGSELKV-IESP-WPLRS--  
TAPWSNLQIEVVGPIVTV-SEEGHKHVLIVADPNTRWVEAFPLKPYTHVAV-AQVLLQHV-FARWGVPIRLEAAQGPQFA-  
-----RHVLVSCGLAL-GAQVASLSDLRQFPCLTSSGAYWEFKRALKEFIFLHG---  
KKWAASLPLLHLAFRASSTDATP-----  
>ISSc  
-----LRWQV--  
ERPGALWHGDVCHVTGCGGKAMPLRIHGLDDASRYVVALEAHTTKEIDML--AMTVDA-  
LRRHGKPDALYLDNGSTYR-----GDVLKTACARL-GITLLHAKPYDPEARGKMERFWRTL--REGCLTYLGA--  
VASLVDINTTLRAYHPAPHAGLL-----QTP-----  
>AciFLERV  
HEA--LGHAGADP--TRRELKKQQLWIPV-REIRRVKDCVECGRYNAGRRGQRMGG---LTIKS--  
TVPWGSICMDVAGPLGITGMKGEKYLVLVDSMSGYVAVKPVQRANGSSVV--SMLDQA-  
CCYMGIPKELRTDNGTHFR-----NAKVDQWCQEN-  
GVMRVYSPYTPQANGVVERTIGLVKSWIGKNANGKEWKVLELVKTLNDRHRQGRPSAEELN-----  
QRPFTSIQGVQQLKPVDP  
>AliFLERV  
HEA--LGHAGLLP--TRRGLVKQNLWIPM-KQIQQVLKRCVCGKYNAGRRGKRTEG---LTIKS--  
TIPWGSICMDVAGPMGVTGKGEKYLIVLVDMSGFVVVRPVKANGNSVV--SMLDYT-CACLGIPRELRTDNGTHFK-  
-----NVQVNRWCEQH-  
GVMRVYSPYTPQANGVAECTIGLVKNWLAKNANSKEWKSVDIGRALNDRDRAGRPSDELN-----  
QRPFVTIQGVQQLKPALG  
>JSRV  
HD---LHHQNSHS-----LRLQFKISR--EAARQIVKSCSTCPQFFVLPQYG-----VNPRG--LRPNHLWQTDVTHIP---  
QFGRLLKYVHVSIDTFSNFLMASLHTGESTRHCI--QHLLFC-FSTSGIPQTLKTDNGPGYT-----SRSFQRFCLSF-  
QIHHKTGIPYNPQGGQIVERAHQRIKHQLLKQKKNELYSPPHNALNHALYVLNFLTLDTEG-----  
NSAAQRFWGERSSC---  
>SRV-1  
HT---LHHLNAQT-----LKLMFNIPR--EQARQIVRQCPCATYLPVPHLG-----VNPRG--LLPNMIWQMDVTHYS---  
EFGNLKYIHVSIDTFSGFLATLQGETTKHVI--THLLHC-FSIIGLPKQIKTDNGPGYT-----SKNFQEFCSL-  
QIKHVTGIPYNPQGGQIVERAHLKTTIEKIKKGEWYTKGTPRNLNHALFILNFLNLDQDQ-----  
HSAADRFWHSNPRK---  
>MMTV  
HA---LHHQNAAA-----LRFQFHITR--EQAREIVKLCPCPDWGHAPQLG-----VNPRG--LKPRVLWQMDVTHVS---  
EFGKLLKYVHVTVDTYSHFTFATARTGEATKDVLL--QHQAQS-FAYMGIPQKIKTDNAPAYV-----SRSIQEFARW-  
KISHVTGIPYNPQGGQAIVERTHQNIKAQLNKLQKAGKYY--TPHLLHALFVLNHNVMNDNQ-----  
HTAAERHWGPISAD---  
>RSV  
HT---ALHIGPRA-----LSKACNISM--QQAREVVQTCPHCNSAPALEAG-----VNPRG--LGPLQIWQTDFTLEP---  
RMAPRSWLAVTVDTASSAIVTQHGRVTSVAVQ--HHWATA-IAVLGRPKAIKTDNGSCFT-----  
SKSTREWLARW-GIAHTTGIPGNSQGGQAMVERANRLKDRIRVLAEGDGFPTSKQGELLAKAMYALNHFERGENT-----  
-KTPIQKHWRPTVLT---  
>LDV  
HA---FLHLGAKA-----LAQECNIPL--TEVERLVKSCSHCQKTPLWMAG-----VNPRG--LEPNQIWQTDFTMYP---  
PFRPNHWLAVTVDYSGVIVATAHRGTSRHAII--HHWATA-IAVLGRPVIKTDNGSAFT-----  
SKAATAWAQRW-HITLKHGAIYNSQGGQAIVERANRTLKARLEALGEGEGWPPEHQPELLYRALYSMNFFAR-STE-----  
QTSVARHWSHQRLP---  
>EIAV  
HE---NWHSTPKI-----LARNYKIPL--TVAKQITQECPHCTKQGGSPAGCV-----MRSPNHWQADCTH-----  
LDNKIILTFVESNSGYIHATLLSKENALCTS--LAILEW-ARL-FSPKSLHTDNGTNFV-----AEPVVNLLKFL-  
KIAHTTGIPYHPESQGIVERANRTLKEKIQSHRDNT---QTLAALQLALITCNKGRESMGG-----QTPWEVFITNQAQV--  
--  
>HIV  
HE---KYHSNWRA-----MASDFNLPP--VVAKEIVASCDKQQLKGEAMHGQV-----DCSPGIWQLDCTHL-----  
EGKVILVAVHVASGYIEAEVIPAETGQETA--YFLLKL-AGR-WPVKTIHTDNGSNFT-----GATVRAACWWA-  
GIKQEFGIPYNPQSGGVVESMKNELKKIIGQVRDQA---EHLKTAVQMAVFIHNFKRKGGIG-----YSAGERIVDIIATD--  
--  
>FIV

HE----KFHSDPQY-----LRTEFNLPK--MVAEEIRRKCPVCRIRGEQVGGQL-----KIGPGIWQMDCTHF-----  
 DGKILVGIHVESGYIWAQIISQETADCTV--KAVLQL-LSA-HNVTELQTDNGPNFK-----NQKMEGVLNYM-  
 GVKHKFGIPGNPQSQUALVENVNHTLKVWIRKFLPET----TSLDNALSLAVHSLNFKRRGRIG-----  
 MAPYELLAQQESLR----  
 >HmGINGER2-1  
 -----NGLHLGALK--TYKKIIE-GYANIARKAVEIFISFCPTCNLNRQLKKAPL-----QPIIS--TGFLQRLQIDLIAMESK-  
 PDKEFRYIGHVVDHFSKFHILFPMRNKTALETA--NNLKRFLVLSYFGLPAILHSDNGSEFV-----NDVIKSLLLTW-  
 KTQIVNGSPRHSQSGLVEQGNFTIERLISSREYDSGQ--SNWSEWLVEIQCKFNV-----  
 >1731  
 HKR---NGHLNTSS--LQEMVRK-KMVGVEKVVFKPDAVCKTCMLAKIHVQFPFKT-----TRSRA--  
 EELDMIHSDLCGPFSTPSLAGSKYFLTFIDDKSRRIFVYFLRKKDEVFTKF-VEFKKLVERQTRKIKCIRSDNGGEFV-----  
 -----NNVFDYDLKAH-  
 GIARQLTIPHTPQQNGVAERANRTLVEARCMLLQSELGEALWAEAINAVYLRNRSTSRALQ-----KTPMEEWTG----  
 -----  
 >Tnt-1  
 HKR---MGHMSEKG--LQILAKK-SLISYA---KGTTVKPCDYCLFGKQHRVSFQT-----SSERK--  
 LNILDVYSDVCGPMEIESMGGNKYFVTFIDDASRKLWVYLKTKDQVFQVF-  
 QKFHALVERETRKLKRLRSDNGGEYT-----SREFEEYCSSH-  
 GIRHEKTVPGTPQHNGVAERMNRITVEKVRSMRLMAKLPKSFWGEAVQTACYLINRSPSVPLA-----EIPERVWTN----  
 ----  
 >Hydra1-2  
 HEI---LGHCNYED--ISKLQNV-VKGMKITGKIDKSNLNCKICTQGKQVQSRNRE-----PDTRA--  
 KAALELVHTDLAGPIDPEAKDGFKYALAFDDYSGAVFVYFLKAKSDTARAT-EKFIAD-TAPYGRICKVRSDNGTEFT--  
 -----AKEFQSLLSKN-  
 GIRHETSAPYSPHQNGTAERNWRTLFEARCMILESGLPKMLWTYAVMTAAVIRNRCYNSRIH-----QTPYYALTG---  
 -----  
 >ISTv1  
 -----VRYWA--LSPNLIWHADVHYFRG----  
 VRGQYIYGIIDDFSRKVLACIQIPDLAATTA--NVAASA-FIEFGAPYCFWTDNGSEN-----GAFQDLLDLW-  
 GVQWRHTDHSHPYQNGKIERFWPTLERCQ-----SIQAIPAFIWEYNNNTPHEDL-----  
 >CoDi6.3  
 HCA---LGHPCEAT--TRATAKAFGVRL-----IGQMKPCKDCALSKAKAKKISKV----PVKRA--SKPGGRLCIDISSPSTK-  
 SVGGKCHWLLVDDCTDYAWSFFLNKKTNDIMI--ALIKEL-KQAYDIDVKIRCDNSGENN-----ALQRSCQEG-  
 GITFEYAPNTPPQNGRVERFRPTLYGRVRAMLRDVSVNKRLWAEAAANTATDLDNMLLKQGET-----TNSFHKFFG---  
 -----  
 >Cer7  
 HG---KYHTNEQQ--TMEATREKA WIPCLRRQVKKIIGKCVKQRYNRAPMKYPNMADMPSFRVRR--  
 SRPFENTGLDYFGPMTFDGSTESWGCVLSCATTRLTHIELVQQCSTKAFI--NAIRRF-  
 VSERGIPDRIVSDNAPQFLGQILNRASKENALDKDILEYLGNT-  
 SIEWSFITPYAPWQGGMYERMMSIKQAIYK SIGKNILTLDDLETVMKEVSGIINSRPLTYVT-----EGAGTTICPKDFIN-  
 ---  
 >Cer10-1  
 HEI---NGHLPEQY--TLSALKTMYWIPLCKALVRSVISNCKICKKVFGLPYYPNTKQLPGCRTEP--  
 SKPFAKVGLDYLGPEYQESIGKAYVLLYTCLVTRAAVLRVVPDATTESYL--MALRTI-  
 FHQVGPSEVHSDNAAIFKLGAKMTDIREGSEIDEIFTCFLASQ-  
 EIKFIYITPSPWQGGVYERIIGLLKHQIHKICGDQKLDFFSLQYVVSSAQAMINRPLVAHA-----RSPNDMITLRPM--  
 ---  
 >Bel  
 HVS---YLHTGVDA--TFTNLRQY WILGARNLVRKAVFQCKSCFLQRKGTSNQIMGELPI-PRVQA--  
 SRCFQHTGLDYAGPIAITPRIGKAWFSIFVCLTTKALHIEVVSELTTQAFI--AAFQRF-  
 IARRAKPTDLYSDNGTTFHGGKTLRLAIQAKDEELAGFFANE-  
 GISWHFIPPSAPHFGGMWEAGVRSIKLHMKRILGSKALTFEELSTVLTQIEAILNSRPLCP-----TGDNSLDPLTPAHF--  
 -  
 >ApBIN1h  
 -----RQVRRATGAAVN-GRSA-PCVSA--  
 SATPLRNRVDYAGPLQMSRVFKIYIAVFCFTTKAVHLEVVDLSTDAFF--AAFDRF-  
 VARRGLPNEVSDCGTNFVGADRQMRSLNSAEGQAAIG-NARA-  
 TCDWHFNPPSAPHFGGLWEVAVRSTKRLLRVIGNHIFTYEEFSTILARVEAVLNSRPLTPAS-----TDPHDLCLT-----  
 -  
 >Kobel  
 HST---VGHLGRNS--ILAKVREKYWIYGASQLAKRVARSCVTCQRYHAAPCEQVMAELPA-DRVVA--  
 VSPFTFCGMDYFAPLTVVKR----YGVIFTCFSSRAVHLEIAHSLETDACI--NAIRRF-

MARRGPVRSIRSDNGTNLVGSEKELRHALEGLDQSRMNDVLCAE-  
GIEWHFNPPAASHFGGVWERMIRSIRKILYSLREQPRDDETLSTLFC EAENIVNNRPLTTTS-----SDPNDLLPLTPNM---  
--  
>Tas  
HEE---LLHAGISS--ILAKMREAYWIPRGRQAIKRALNCFHCRRWKS KPFQMPMPYPYPERVSK--  
HPPFENTGV DYGPF TIRITQNDGSVYSLVS--QLELYISK SPLTYPDQVSF-SVYVRF-  
VSRRLPKRMLSDNGTQFVWARSVLSVSKVHQTDNAILDYCAAH-  
NIQWSFITPLVPWQGGIYERMVGPVKGSMKKTIGWKRLTQEELQTLTTDIEAVVNCRPIIPLTSEN--  
TTVLRPVDFLLPHGN-----  
>Zebel  
-----LLHPGSER--VLAELRRQYWVLRGREAIRKHQHTCRDCQFWRAKQTPQMADLPSSRLQLY--  
KPPFYSTGVDCFGPFTVGRRQEKRWGVLYKCM TTRCVHLDLLEQLD TDAFL--LSLRRF-  
IARRGKPMELLCDNGTNFVGDREL-RETFNAMAPKLQEQLAEQ-  
RIRFRFNPPSAPHFGGTWEREVKSVKSALRVILREQSVPEAVLQTLTLLVEVEGILNSKPLGYISSDVADLDPVTPNLLLMGR  
RDAS----  
>Tamy  
HRR---FCHANHAT--VVNELRQTYWILSLRDAVKKVLHQCWCRTRKMKPQMPPTGDL PVERLRYG--  
SHPFTCTAVDYFGPMFVGRRKEKRWGALFTCLTTRAVHLELVPSLSTSSMI--MALRRM-  
SARRGTPRVIYSDNGTNFIGANHELREEIGK LKKNELIDAANQE-  
GIRWKFI PP GAPNMGGAWERMVRTVK TALSAILNERSPPEEVLHTLLTEVEHTVNSRPLTHLSVNPEDDES LTPNHFLIG  
RSCGS----  
>Purbel  
HE----LGHHGVAV--TTAKTRK YWILQGYRLAKTVKHRCVTCRAAECRRETQIMANLPSCRLAPF--  
TPPFHYTSCDYFGPYLVRNKKAKHYGIIFTCLNTRAVHLEMATDCSTMEFL--QALRRF-  
IAVRGQPAQFLSDNGTQFVGAERELREMRVGRWSERELKDFCAEK-  
RVVWKFTVPGAPHQNGCAEAMVKSKCFALKRAIQEQLTPLELYTCFLEVANLVNERPIGRVGNPD DGGYLCPNDLL  
LGRSSSK----  
>Cigr-1  
HNN---LGHPGFSR--LYHF I KTRN-LPFSSEEAKIICRQCKTCAEVKPRFYK PASR-----NLIKA--MRPWERLSMDFKGPVK---  
-GRNSYLLIIVDEYSRFPFVPCKRMTSAVVI--QCLTNL-FCLFGFPA YVHSDRGLSFI-----SHEVKVFLTER-  
GIATSKSTPYHPQGN SQCERVNQTIWRTVKLLLHGKLM AEEQWEEVLPQALHAIRSLVCLATN-----  
ETPHERFFNF SRRS----  
>ApBIN1j  
HIR---LLYIGPQG--LLAHIHRKYWPIRGRSLARQTVHKCMICFRFKPRMLQPVMAPLPS-VRDTR--  
CRAFERAGVDLCGPINIKV TPLKH YIAVFVCMVTRAVIWSLFEIC-----LRMRSF-LCYSGAKKILSSWASDLK-----  
---ESKLN DQ LSEL-GIEWQF ILPSAPHSGGLWESA VKS AKQHLVKSSNGSLLTYEETSTLLCRNEAVLNSRPLTATS-----  
SDPSNVLTP-----  
>Gypsy  
HN----RAHRAAQE--NIKQVLRDY YFPKMGSLAKEVVANCRVCTQAKYDRHPKKQ--ELG-ETPIP--SYTGEMVHIDIFST--  
-----DRKLF L T CIDKFSKYAIVQP VVSRTIVDIT--APLLQI-INLFPNIKTVYCDNEPAFN-----  
SETVTSMLKNSFGIDIVNAPPLHSSNGQVERFHSTLAEIARCLKLDKK---NDTVELILRATIEYNKTVH SVTR-----  
ERPIEVVHP-----  
>Tom  
HEK---LLHPGIQK--MTKLFKENHYFPNSQLLIQNIINECRVCNLAKTEHRNTKM--PFK-VTPSP--GHCRDKFVIDIYSS-----  
-EGKH YLSCIDIYSKFATLEQIKTKDWIECK--NALMRI-FNQLGKPTLLKADR DGAFS-----SLALKQWLESE-  
GVELQLNTAKTG--VADVERLHK TINEKIRIINSSKN---EIKLGKMENILYIYNHKTRHDTT-----QTPAIFLYAGQP-----  
>Zam  
-----NSNHRGIDE--TFLHLKRETYFPNMKNKISELIRNCETCLKLYDRQPQNI--VFE-TPETP--SKPLDIIHIDIYTI-----  
NNNFNLTIIDKFSKFAAVYPIPNRNGINCI--KA IKNF-FSQFGLPKKLIHDQGV EFC-----NDIFRKFC SQY-  
NILLHVTSFQQSSNSPVERLHSSLTEIYRILLDRK---TDHEEIMSETVITYNNAIHSTTK-----HTPFELFNGRTH-----  
>DpCIN1  
-----RRKFVQ--  
KGINDTWQIDL VEMIPFYKEKGYRYLLTVIDTFSKFAYAVPVKSKTALDVL--SALKKI-LKISHKPKNIQSDQGKEFF-----  
-----NVAFGELMKKI-NIN--HYHTYTHLKASICERFNRTLKNRMWKIFSMQGN--HTWIYILHDLLKDYNN SYHRTIK---  
---MRP-----  
>DrCIN1  
-----RNRVVV--  
YGM DTQFQADLVDMTAYSTENDGNKFM LTIDVFSKYAWSRVLKNKSGVEVT--KAFESI-  
LEEGRVPRKLQTDQGKEFF-----NKHFQDLMKKH-DIN--HFATATDLKASVVERFNRTLKSRMWRFLTATNS--  
RRYINVLQDIMTGYNNSYHKTIK-----MRP-----  
>SmCIN1

-----TRSYKT--  
 MGVDLWQMDLMEPIFKINKGYKYILTCVDIFSRFARAIPTKTKSANEMA--EAIKEL--FIDGKPRNLQTDLGKEFY----  
 -----NSK VREIIGI-----NHYSVFSQFKA AHVERFNRTLDRDLKKYFYVYKGN--KTWINVLQKAIYSYNYSPHRGLN-----  
 --MRP-----  
 >HTLV-2  
 HG---LTHCN-----QRALVSGATPREAKSLVQTCHTCQTINSQHHMPRG-----YIRRG--LLPNHIWQGDVTHYKY---  
 KKYKYCLHVVDVTFSGAVSVSCKKKKETSCEI--SAVLQA-ISLLGKPLHINTDNGPAFL-----SQEFQEFCTSY-  
 RIKHSTHIPYNPTSSGLVERTNGVIKNLLNKYLLDCPN--LPLDNAIHKALWTLNQLNVMNPS-----KTRWQIHHSP-----  
 -  
 >BLV  
 HK---LTHCN-----SRALSRWPNSAWDPRSPATLCETCQRLNPTGGGKMR-----TIQRG--WAPNHIWQADITHYKY---  
 KQFTYALHVFVDVTSYGATHASAKRGLTTQMTI--EGLLEA-IVHLGRPKKLNTDQGANYS-----SKTFVRFCCQF-  
 GISLSHHVYPYNPTSSGLVERTNGLLKLKLLSKYHLDEPH--LPMTQALSRALWTHNQINLLPIL-----KTRWELHHSP-----  
 >WDSV  
 HG---VSHTHKGG--IMSYFSKFWTHPKASQTIDLILGHCQICLKHNPYKYSRLQG-----HRPLP--SRPFAHLQIDFVQMCV--  
 --KKPMYALVIIDVFSKWPEIIPCNEKEDAKTV---ILMKDI-IPRWGLPDQIDSQDQTHFT-----AKISQELTHSI-  
 GVAWKLHCPGHPRSSGIVERTNRTLKSKIIKAQEQLQL--SKWTEVLPYVLEMRATPK-KHG-----  
 LSPHEIVMGRPMKTTYLS  
 >ApGINGER2a  
 HSA---IGHGGRNR--MVSELKN-NYCINITETIMVFLKCAECHKKTVCSEKVLAP-----KPFLQ--  
 PTFNSRAQVDLIDMQSQ-RHNDYRFIMNYQEHLTKYIVLKPLKSKCAEEIA--YNLIDI-YTLFGAPTILQSCSGKFKV-----  
 -----TSIINKLNVIWDEIKIDYGPWKHSESQESVERTNRDVQEMLSAWMTKKDS--LDWPSALKFIQFKNRTFHSGIG----  
 ---TSPYEAMFGCTARIGYES  
 >BmGINGER2a  
 HDAHLATGHGGRNR--LVKGINN-KYKNITTEAVMLYLSLCEACQKKG--KKKGIAI-----KPTT--  
 AEMNSRCQMDLIDLQTS-PDNEFKFISNYQDNL-NFVVLRLPKTKTASEVV--KQLMDI-FTLGAPS-SNVINDREFA-----  
 -----NKIIQELANMRDGVKIIHGKPRHSQSQGSIERANQDVQNMITTWLITNQI--TKWS-----  
 ---  
 >HsSCAND3  
 HNTHLSIGHGGRTR--MEKELQAKYKNI-TKEVIMLYLTLCKPCQKNSKLLKVL-----TSKSI--  
 KEVSSRCQVDLIDMQLN-PDGEYRFILHYQDLCTKLTFLRSLKSKRPTEVA--HALLDI-FTHIGAPSVLQSDNGREFS-----  
 -----SQVVSSELSNIWPELKIVHGKSQTCQSQSSAEQT-EDIRKRIFSWMQTNNS--SHWTEFLWFIQMSQNPYHRSMQ----  
 --QTPCESAFSSEAKLGLSH  
 >FcSCAND3  
 HNTHLSIGHGGRTR--MEKELQAKYKNI-TKEVIMLYLTLCGPCQKHSKLLKVL-----TSKPI--  
 KEVSSRCQVDLIDMQLN-PDGEYKFIMHYQDLRSLKSLKSKRPKEVA--HALLDI-FTHIGAPSVLQSDNGREFS-----  
 -----SQIVYELSNIWPELKIVHGKQPCQSQSSMNQTNDDIQKRIISWMQTNNS--SHWAEFLWFIQMIQNQPYHRGMQ--  
 -----PNPFEGTFSSEAKPGLCH  
 >MeSCAND3  
 HDTHLNIRHGGRTR--MEKELQPKYHKR-GYNNVI--FNSLQTLSAFEKVTKKCI-----VSKPI--KEVNSRCQVELIDMQLN-  
 PDGEYKFIMSYQDHQTKLSFLRPLKSRRCCEVA--HALLDI-FTHIGAPSILQSEHGRDIL-----  
 SQLVNELNMMWSKLIKIVHGKPRPCQGHGSSVVPKEDIQNMIIISWMQKNSS--LHWSEGLWFIQMMKNRPFHRDTQ-----  
 --HSPREIVDFSEK-----  
 >HsKRBA2  
 HDTHLSIGHGGRTR--MLKELQKYGYNV-TKEVIVLYLTLCKQCHQKNPVPRGL-----  
 APKPMTFKDIDSTCQVEILDMQSS-ADGEFKFILYYQDHSTKFIILRPLRTKQAHEVV--SVLLDI-  
 FTILGTPSVLSDSGVEFT-----NQVVHELNELWPDKIVSGKYHPGQSQGSLEGASRDVKNMISTWMQSNHS--  
 CHWAKGLRFMQMVRNQAFDVSLQ-----QSPFEAMFGYKAKFGLYS  
 >BtKRBA2  
 HDTHLNIGHGGRTR--MLKELQKYGYNV-TKEVIVLYLTLCKQCHQKNPVPRGL-----  
 APKPMPCKDNDSRCQVEILDMQSN-ADGEFKFILYYQDHLTKFIILRPLKAKQAHEVV--SVLLDI-  
 FTILGPPSVLESDSGMEFT-----NQVVNELNEVWPDKIVLKGSHPGQGQGLFLERSRVDVKTMLSAWMQSNHS--  
 HHWTEGLRFMQMVRNQAFDGLSQ-----QSPYEAMFGCKAKFGLYS  
 >LaKRBA2  
 HETHLNIGHGGWTC--MLKELQKYGYNV-TKEVIVLYLTLKYKQCHQKNPVPRGL-----  
 VPNSTTLKDVNSRCQVEILDVQSN-ANAEFKFILCYQDHLTFIILXPLKARQVHEVV--SVLLDI-  
 FIILGTPRVLESNSGIEFT-----NQVNEVSEVWPDNLIVSSQYHTGXGQGSKEQXNEDVQNTMSARMQSNHS--  
 HHWTEVLXFMPMVGNQVFNLSLH-----QSLQCKVTLGLYS  
 >Tor4a  
 -----HTGIDQ--TFSKIAKKYVWPRMNMAIREFIRTCDFCQKDKPNFHPNRA--PVL-SFRTP--NGPYEYGFDLITLPP--  
 TDFGNKYVMVIDFFSKFAYCEPLKSRNSSYLL-SKFRNVI-FKNPFFPKMVVLDNAREHS-----ELAKFMTNN-

NIEPHFTPPRHPSSNGQVENFNRTLKSRRAKCKYE----NWDLVLQEILHDINASEHSVTK-----  
 KSPFFIQSGAECPHNIFD  
 >Pyggy  
 HESLS-SGHTRGERLPIKDNLPRFFWAHEDRSIRRYVRNCDVCEK TNYREKVLRTI----TNTRP--EDIEKEISIDFIKGLPT-  
 -SEGITYLIVVTNRLSKGSIFILLPNIKTETVV--RAFLR--VVAYYLLEAITSDRGSFVS-----VLERLCEIL-  
 KIRRRLLISFYL-TNGSTERINSV-EAYTRAFISAQI----DASLCSIAQIAINSRDATLTG-----VALFFLQHRYNVD-PLQL  
 >Ty1B  
 HRM--LAHANAQT--IRYSLKNNTITYFDVDWSSAIDYQCPDCLIGKSTKHRHIK-GSRL-KYQNS--  
 YEPFQYLHTDIFGPVHNLPKSAPSYFISFTDETTKFRWVYPLHDRREDSIL--DVFTTI-LAFIASVLVIQMDRGSEYT-----  
 -----NRTLHKFLEKN-GITPCYTTTADSRAHGVAERLNRLLDDCRTQLQCSGLPNHLWFSIAIEFSTIVRNSLASPKSK-----  
 -----  
 >Ty4  
 HKR---MGHTGIQQ--IENSIKHNHYEESLDLIKNEFWCQTKISKATKRNHYT-GSMN-NHSTD--  
 HEPGSSWCMDIFGPVSSNADTKRYMLIMVDNTRYCMTSTHFNKNAETIL--AQVRKN-IQYVRKVREINSDRGTEFT--  
 -----NDQIEEYFISK-GIHHILTSTQDHAANGRAERYIRTIITDATTLLRQSNLRVKFWEYAVTSATNIRNCLEHKSTG--  
 -----  
 >ZFERV-2  
 -----KIKVNCPCNRKAIDSRFNDY-----GSIKT--  
 DHENDEISMDFAGPIRPQTKKKNCYFLLITDNASEYTQIFPCKQATEEVI--ESLQQW-FKFRGVPNVRADGAFNLS----  
 -----GRKVEQFIKDS-GAKLIKSVKYQPSSNGIAERRIKEVKNYFCKNSD-----LPWDEQLIDCLKFVNY-----  
 -----  
 >ISEc  
 -----SGPNQKWAGDITYLR--  
 TDEGWLYLAVVIDLWSRAVIGWSMSPRMTAQLAC-DALQMA-LWRRRPRNVVHTDRGGQYC-----  
 SADYQAQLKRH-NLRGSMGSAKGCYDNACVESFFHSLKVECIHGEHFIS--EIMRATVNYIECDYNRWRRHSSWC-----  
 LSP-----  
 >ISLa  
 -----RFFER--SRPNQMWQTDIFSFRG--  
 GQAAYLLAFIDDYSRYMVGLGLYRRQTAENLL-EVYRRA-TGEYNCPAEMLTDNGRQYG-----TTRFEKELKKD-  
 RIKHIRSQPHPMTLGKIERFWKTIWTEFLDRCQFDC--ETAQQRITLWIKYYNHQRPHQGG-----LCP-----  
 >ISaf  
 -----KRFAY--  
 DQINELWQGDLSHGPTINGKAQKTFLIAYIDDCSRFPYAQFFPSKFDGLR--IVTKEA-VLRCGKPKRIYSDNGKIYR-----  
 -----SEVLQYACAEM-GITLIHTQPYDPQSKGKIERFFRTVQTRFYPLELDP--PKSLEELNERFWRYHRKPHASLD-----  
 -KTP-----  
 >Koala  
 HSR---LGHPAFPI--VKRIVQSHKL--SCLDVESNNISVCDACQKAKSHQLPFGL-----STSEV--HSPFELVYSDVWGPAPT-  
 SVGGKYYVVSFIDAYSRTWIYLLKFKSEVFEKFHEFQNHV-ERFFDRKIKIQTDWGGE-----YQKLSNFFNKI-  
 GILHHVSCPHTHQQNGSAERKHRHIVEVGLSLLAHAFIPLKFWDEAFSSAVYLINRIPTKVLQ-----RSPLEQLYN-----  
 >Vitico1-1  
 HLR---YGHNLVKG--LKLLSKKEMVFLPKIDS--VNVCEGCIYKQSKKPFPGK----RSRRA--  
 SSCELIHADLCGPMQIASFGGSRYFLLFTDDHSRMSWVYFLQSKV-----LRTDRGGEFL-----  
 SNDFKVFCEEE-GLHRELTPYSPEQNGVVERKNRTVEMARSMKAKNLSNHFWAEGVATAVYLLNISPTKAVL-----  
 --RTPYEAWYG-----  
 >SIRE1-4  
 HQR---FGHLHLRG--MKKIIDKGAVR-GIPNLKIEEGRICGECQIGKQVKMSHQKL----QHQT--  
 SRVLELLHMDLMGPMQVESLGGKRYAYVVDDFSRFTWVKFIREKSETFEVFKELSLRL-QREKCVIKRIRSDHGREFE-  
 -----NSRLTEFCTSE-  
 GITHESAAITPQQNGIVERKNRTLQEAARVMLHAKELPYNLWAEAMNTACYIHNRTLRRTG-----TTLYEIKWG-----  
 ----  
 >Copia  
 HER---FGHISDGG--LLEIKRKNMFSQDQLLNLELSCEICEPCLNGKQARLPFKQLK---DKTHI--  
 KRPLFVVHSDVCGPITPVTLDDKNYFVIFVDQFTHYCVTYLIKYSDFVSMFQDFVAKS-EAHFLKVVVLYIDNGREYL--  
 -----SNEMRQFCVKK-  
 GISYHLTVPHTPQLNGVSERMIRTITEKARTMVSGAKLDFWGEAVLTATYLINRIPSRLV-----KTPYEMWHN-----  
 ---  
 >Zecol  
 HKQ---FGHASADR--LQRLMHSSNKDKCEFAILQQIVDDCEICKKYKRTKPKPAV-----GLPMA--SEYNETMAVDLHELE-  
 -----PSIWYLHIIDHFRFSAGSIVKTKKSSEI-VNSFIHTW-ISVHGAPQKLYSDNGGEFN-----NQEIRDMAENF-  
 NIEIRTTAGYSPWSNGLLERHNQTLTEILKVKENG---CDWHTALDWALMAKNSMLN-VHG-----YSPYQLVFG-----
